# Supplementary material
Source: PubMed Central journal article supplement (PMC2955827)
Supplement: NIHMS231952-supplement-1_si_001.pdf [file NIHMS231952-supplement-1_si_001.pdf]

# Systematic Analysis of Helical Protein Interfaces Reveals Targets for Synthetic Inhibitors

Andrea L. Jochim and Paramjit S. Arora

*Department of Chemistry*

*New York University*

*New York, NY 10003*

## Supporting Information

|                                                                                                                                 | Page |
|---------------------------------------------------------------------------------------------------------------------------------|------|
| Description of methods                                                                                                          | 2    |
| <b>Figure S2.</b> Classification of (a) helical interfaces with binding clefts and (b) extended helical interfaces by function. | 6    |
| <b>Table S1.</b> Affinity data for small molecule inhibitors of binding cleft protein targets.                                  | 7    |
| <b>Table S2.</b> Dataset of HIPP interactions with Binding Clefts                                                               | 8    |
| <b>Table S3.</b> Dataset of Extended Interface HIPP interactions                                                                | 25   |
| <b>Table S4.</b> Dataset of Weak Interface HIPP interactions                                                                    | 56   |
| <b>Table S5.</b> Full Set of HIPP Interactions                                                                                  | 202  |

## Methods used to Identify HIPP Interactions

Protein structures were obtained from the Protein Data Bank (<http://www.pdb.org/>). In addition to using Rosetta, we wrote computer code in Perl, C and C++ programming language to identify and analyze HIPP interactions. The key steps to identifying HIPP interactions are listed below and shown in Figure S1.

1) Using the advanced search function on the PDB website, we extract all structures with more than one protein entity.

2) Sequence alignment of all complexes was performed using the CD-HIT clustering algorithm. CD-HIT clusters similar chains according to a similarity threshold. Although this method allows for all unique chains to be clustered it does not allow for all unique protein complexes to be clustered. To overcome this problem we removed chain identifiers in the FASTA files. The popular BLAST(36) method was not used because the computing of “all versus all” similarities would likely not be able to identify unique complexes properly since the chain identifiers in the FASTA files were removed. Since CD-HIT uses a “short word filter” method it can cluster properly even with these FASTA file modifications.

3) **Perl script to construct individual PDB files for each interacting chain within the parent PDB file.** This script reads a PDB, identifies atoms from different chains that interaction with each other, then creates a new formatted PDB file with those two chains. This process is repeated until all interacting chains have a new PDB file. If the parent PDB file contains more than one structure (*ei.* NMR structure), only the first structure is considered.

**Perl script to identify protein partner chains between separate entities.** This script reads a PDB file, identifies chains that belong to separate entities within the PDB file, and creates a list of the PDB code and partnering chains that are part of the separate entities. This enables us to find those helix interfaces that are between separate protein entities as opposed to helical interfaces between chains in a single protein.

4) **Modifications within Rosetta written in C++ programming language to identify helical interfaces between interacting protein chains.** Rosetta contains programs that identify interface residues and assigns

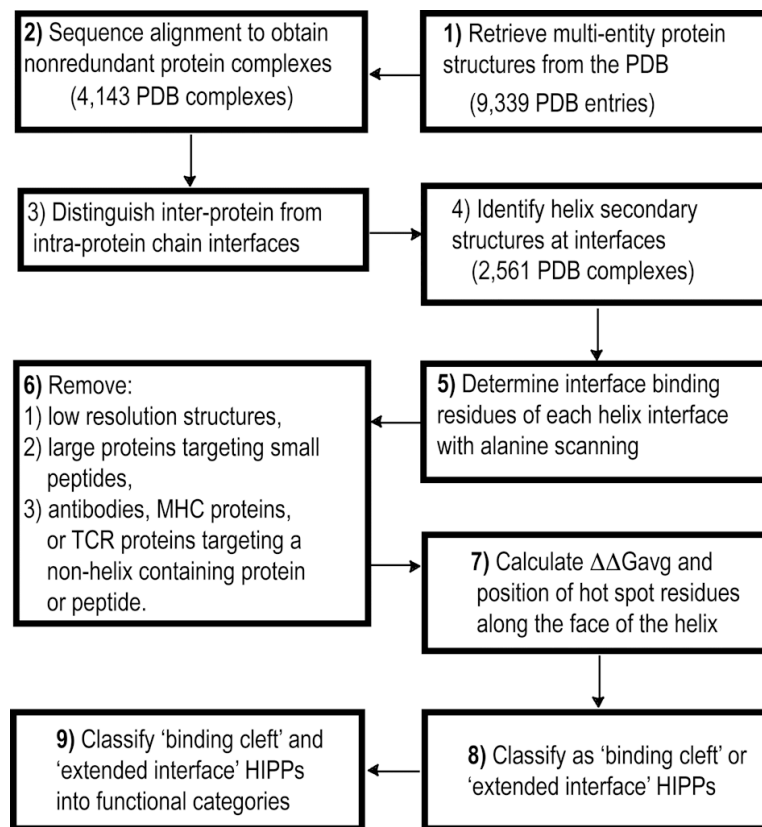

**Figure S1.** Protocol for the evaluation of structures from the Protein Data Bank to identify and assess helical interfaces in protein-protein (HIPP) interactions.

secondary structure to a protein backbone using  $\phi$  and  $\varphi$  dihedral angle analysis. We then link the interface and secondary structure assignment subroutines to find protein chains with interface residues that lie within a helix. We define helical segment as one that contains at least four contiguous residues with  $\phi$  and  $\varphi$  angles that are characteristic of the  $\alpha$ -helix ( $\phi = -47^\circ \pm 25^\circ$ ,  $\varphi = -57^\circ \pm 25^\circ$ ).

The Dictionary of Secondary Structure of Proteins (DSSP)(37) and STRIDE(38) are common methods for obtaining information on protein secondary structure of proteins in the PDB. DSSP relies on hydrogen-bonding patterns in proteins to determine secondary structure and STRIDE uses a knowledge-based structure assignment. Although these methods are reliable for determining secondary structure, similar results are also obtained with  $\phi$  and  $\varphi$  analysis as in Rosetta.(38) We performed random checks on secondary structures as calculated by Rosetta and defined by DSSP and STRIDE and found that the three methods are comparable. We used Rosetta for secondary structure analysis to retain consistency across our computer codes.

Often, protein-protein interfaces are defined according to geometrically continuous patches of residues on the surface of a protein that exclude solvent by binding to another chain.(39) This definition might include some residues that are not really involved in the interaction or exclude some residues that play a key role in the interaction.(40) Therefore, we use a distance threshold between residues of different chains. When parsing PDB files, it is difficult to determine when contacting chains reflect crystal packing or a genuine biological assembly. The problem is amplified when hundreds of PDB files are automatically parsed. Two approaches are suggested for remedying this problem. One calculates the reduction of solvent accessibility due to oligomerisation(41) and while the other is based on measuring the conservation of contacting residues.(42) Instead of relying on these prediction algorithms, we visually inspected each candidate target in categories 1-3 for crystal packing multimers and eliminated those few interactions that were artifacts of crystal packing.

5) Hot spot residues were predicted by a computational alanine scan on each of the complexes in the dataset using the Rosetta 2.0 software. There are additional methods, besides Rosetta alanine scanning, for predicting hot spot residues. These methods are either based on determining hot spot residues based on amino acid sequence or a scoring function.(43-46) Glycine and proline residues were exempted from mutation to alanine as any such event may result in a conformational change in the protein backbone. In cases of multiple side chain orientations for the same residue in a PDB file, we eliminated the residue from consideration as a hot spot residue.

6) The HIPPIE dataset of 2,561 complexes was further analyzed to screen for potential receptors with binding clefts and extended interfaces that may be targeted by small molecules and helix mimetics, respectively. Any such undertaking inevitably involves a number of subjective decisions.(47) Our procedure involved (1) removal of all entries with resolution  $>4.00 \text{ \AA}$  and all structures determined by methods other than X-ray crystallography or NMR spectroscopy. We note that hot spot analysis becomes increasingly unreliable with lower resolution structures. (2) Visually inspection of structures to eliminate complexes that we considered too large or complex to target with a small molecule or oligomer; examples include structures of nucleosomes, ribosomes, proteasomes, rubisco, and viral capsids. We also eliminated structures where proteins containing a helix are complexed with a non-helical peptide such as T-cell receptor proteins, MHC proteins, and antibodies. Duplicate sequences and instances where a protein was identified to target a single helix or a protein with a helix targeting a non-helical peptide of length less than 12 residues were removed by automated procedures and verified by visual inspection.

- 7) We identified HIPP interactions with a  $\Delta\Delta G_{\text{avg}} \geq 2$  kcal/mol and calculated the end-to-end separation of the hot spot residues in the identified helix using a C++ program.
- 8) HIPPs with a  $\Delta\Delta G_{\text{avg}} \geq 2$  kcal/mol from step 7) were classified as ‘binding cleft’ or ‘extended interface’. A binding cleft was defined as having an end-to-end separation of five or less residues while an extended interface was defined as having an end-to-end separation of greater than five but less than twenty-one residues. Twenty residues represent roughly five helical turns or 30 Å. Entries that contain longer sequences are included in Table S3.
- 9) The ‘binding cleft’ and ‘extended interface’ HIPP interactions were classified according to molecular function. The categories were derived from those listed in the header of the PDB file.

## Supplemental References

36. Altschul, S., Gish, W., Miller, W., Myers, E., and Lipman, D. (1990) Basic local alignment search tool, *Journal of Molecular Biology* 215, 403-410.
37. Kabsch, W., and Sander, C. (1983) Dictionary of Protein Secondary Structure: Pattern Recognition of Hydrogen-Bonded and Geometrical Features, *Biopolymers* 22, 2577-2637.
38. Dmitriy, F., and Argos, P. (1995) Knowledge-Based Protein Secondary Structure Assignment, *Proteins: Structure, Function, and Genetics* 23, 566-579.
39. Jones, S., and Thornton, J. M. (1997) Analysis of protein-protein interaction sites using surface patches, *Journal of Molecular Biology* 272, 121-132.
40. Ofran, Y., and Rost, B. (2003) Analysing Six Types of Protein-Protein Interfaces, *Journal of Molecular Biology* 325, 377-387.
41. Henrick, K., and Thornton, J. M. (1998) PQS: a protein quaternary structure file server, *Trends in Biochemical Sciences* 23, 358-361.
42. Elcock, A. H., and McCammon, J. A. (2001) Identification of protein oligomerization states by analysis of interface conservation., *Proceedings of the National Academy of Sciences USA* 98, 2990-2994.
43. Guney, E., Tuncbag, N., Keskin, O., and Gursoy, A. (2008) HotSprint: database of computational hot spots in protein interfaces, *Nucleic Acids Research* 36, D662-D666.
44. Schymkowitz, J., Borg, J., Stricher, F., Nys, R., Rousseau, F., and Serrano, L. (2005) The FoldX web server: an online force field, *Nucleic Acids Research* 33, W382-W388.
45. Massova, I., and Kollman, P. A. (1999) Computational Alanine Scanning to Probe Protein-Protein Interactions: A Novel Approach to Evaluate Binding Free Energies, *J. Am. Chem. Soc.* 121, 8133-8143.
46. Ofran, Y., and Rost, B. (2007) Protein-Protein Interaction Hotspots Carved into Sequences, *PLoS Comput Biol* 3, e119.
47. Tsai, C.-J., Lin, S. L., Wolfson, H. J., and Nussinov, R. (1996) A Dataset of Protein-Protein Interfaces Generated with a Sequence-order-independent Comparison Technique, *Journal of Molecular Biology* 260, 604-620.

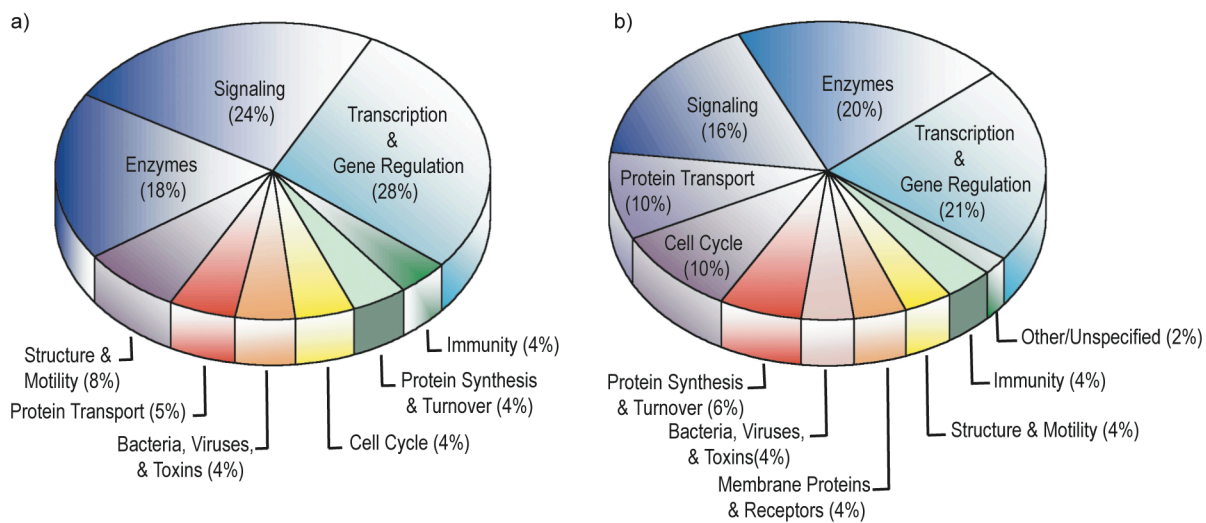

**Figure S2.** Classification of (a) helical interfaces with binding clefts and (b) extended helical interfaces by function.

**Table S1.** Known Small molecule inhibitors of binding cleft protein targets (HIPP, Category 1).

| Protein target (PDB code)<br>Protein partner<br>Small molecule <sup>a</sup> | $\Delta\Delta G_{\text{avg/helix}}$<br>(kcal/mol) <sup>b</sup> | Hot spot<br>residue helix<br>position <sup>c</sup> |
|-----------------------------------------------------------------------------|----------------------------------------------------------------|----------------------------------------------------|
| Bcl-xL (1bx1)<br>Bak peptide<br>ABT-737                                     | 2.4                                                            | <i>i, i+3</i>                                      |
| HDM2 (1ycr)<br>p53 peptide<br>nutlin                                        | 3.7                                                            | <i>i, i+3, i+4</i>                                 |
| HPV E2 (1tue)<br>E1 Regulator<br>Indandione inhibitor                       | 2.7                                                            | <i>i, i+3, i+4</i>                                 |
| $\beta$ -catenin (1jpw)<br>Tcf4<br>PNU-74654                                | 2.9                                                            | <i>i, i+3, i+4</i>                                 |

<sup>a</sup>Chains in the complex featuring a helix at the interface; candidate helix to be mimicked is part of the indicated chain. <sup>b</sup> $\Delta\Delta G_{\text{avg/helix}}$  is derived from Rosetta computational alanine mutagenesis studies and indicates the average free energy penalty for mutating two or more key residues at the interface to alanine. <sup>c</sup>Relative positioning of the hot spot residues on a helix.

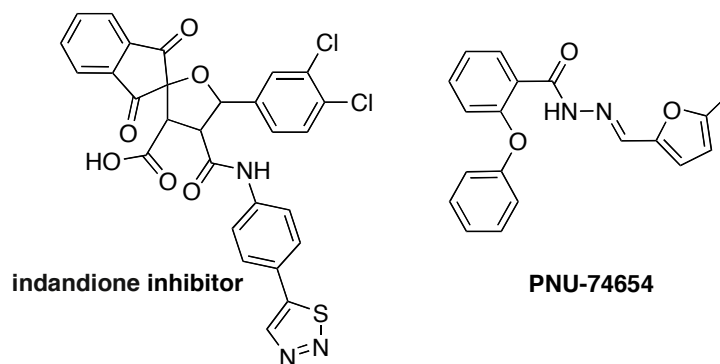

**Indandione inhibitor:** Wang, Y., Coulombe, R., Cameron, D. R., Thauvette, L., Massariol, M. J., Amon, L. M., Fink, D., Titolo, S., Welchner, E., Yoakim, C., Archambault, J., and White, P. W. (2004) Crystal structure of the E2 transactivation domain of human papillomavirus type 11 bound to a protein interaction inhibitor, *J Biol Chem* 279, 6976-6985.

**PNU-74654:** Trosset, J. Y., Dalvit, C., Knapp, S., Fasolini, M., Veronesi, M., Mantegani, S., Gianellini, L. M., Catana, C., Sundstrom, M., Stouten, P. F., and Moll, J. K. (2006) Inhibition of protein-protein interactions: the discovery of druglike beta-catenin inhibitors by combining virtual and biophysical screening, *Proteins* 64, 60-67.

**Table S2.** Dataset of HIPP interactions with Binding Clefts

## Description of Entries:

- A. PDB code of predicted target.
- B. Chains in the complex featuring a helix at the interface.
- C. Candidate helix to be mimicked is part of the indicated chain.
- D. Title of PDB entry.
- E. Function of protein complex.
- F.  $\Delta\Delta G_{\text{avg}}/\text{helix}$  is derived from Rosetta computational alanine mutagenesis studies and indicates the average free energy penalty for mutating two or more key residues in the helix at the interface to alanine.
- G.  $\Delta\Delta G_{\text{sum}}/\text{helix}$  is derived from Rosetta computational alanine mutagenesis studies and indicates the average free energy penalty for mutating two or more key residues at the interface to alanine.
- H.  $\Delta\Delta G_{\text{sum}}/\text{chain}$  is derived from Rosetta computational alanine mutagenesis studies and indicates the sum free energy penalty for mutating two or more key residues in the helix at the interface to alanine.
- I. Helix contribution refers to the proportion of key contact residues positioned on the candidate helix as compared to the chain (see text for a detailed explanation).
- J. Number of hot spot residues in helix.
- K. Relative positioning of the hot spot residues on a helix.
- L. Hot spot residues derived from Rosetta computational alanine scanning mutagenesis.
- M. Number of residues separating end hot spot residues (see Methods for more details).
- N. Length of candidate helix to be mimicked.
- O. First residue of the candidate helix segment.
- P. Last residue of the candidate helix segment.
- Q. Sequence of candidate helix to be mimicked.
- R. Resolution of PDB structure (NOT APP indicates NMR structure).



| A. PDB<br>CODE | B. INTERFACE |          | D. TITLE                                                                                  |
|----------------|--------------|----------|-------------------------------------------------------------------------------------------|
|                | CHAINS       | C. CHAIN |                                                                                           |
| 1A00           | A B          | A        | CHEY-BINDING DOMAIN OF CHEA IN COMPLEX WITH CHEY                                          |
| 1A00           | C D          | D        | CHEY-BINDING DOMAIN OF CHEA IN COMPLEX WITH CHEY                                          |
| 1A4Y           | D E          | E        | RIBONUCLEASE INHIBITOR-ANGIOGENIN COMPLEX                                                 |
| 1A9N           | A B          | B        | CRYSTAL STRUCTURE OF THE SPLICEOSOMAL U2B"-U2A' PROTEIN COMPLEX BOUND TO A FRAGMENT OF 1  |
| 1AY7           | A B          | B        | RIBONUCLEASE SA COMPLEX WITH BARSTAR                                                      |
| 1B0N           | A B          | B        | SINR PROTEIN/SINI PROTEIN COMPLEX                                                         |
| 1B27           | B E          | E        | STRUCTURAL RESPONSE TO MUTATION AT A PROTEIN-PROTEIN INTERFACE                            |
| 1B9X           | A B          | B        | STRUCTURAL ANALYSIS OF PHOSDUCIN AND ITS PHOSPHORYLATION- REGULATED INTERACTION WITH TI   |
| 1BDJ           | A B          | B        | COMPLEX STRUCTURE OF HPT DOMAIN AND CHEY                                                  |
| 1BXL           | A B          | B        | STRUCTURE OF BCL-XL/BAK PEPTIDE COMPLEX, NMR, MINIMIZED AVERAGE STRUCTURE                 |
| 1D2Z           | C B          | C        | THREE-DIMENSIONAL STRUCTURE OF A COMPLEX BETWEEN THE DEATH DOMAINS OF PELLE AND TUBE      |
| 1DE4           | G I          | G        | HEMOCHROMATOSIS PROTEIN HFE COMPLEXED WITH TRANSFERRIN RECEPTOR                           |
| 1DML           | C D          | D        | CRYSTAL STRUCTURE OF HERPES SIMPLEX UL42 BOUND TO THE C- TERMINUS OF HSV POL              |
| 1DOA           | A B          | A        | STRUCTURE OF THE RHO FAMILY GTP-BINDING PROTEIN CDC42 IN COMPLEX WITH THE MULTIFUNCTION,  |
| 1DOA           | A B          | B        | STRUCTURE OF THE RHO FAMILY GTP-BINDING PROTEIN CDC42 IN COMPLEX WITH THE MULTIFUNCTION,  |
| 1DS6           | A B          | A        | CRYSTAL STRUCTURE OF A RAC-RHO GDI COMPLEX                                                |
| 1E44           | B A          | B        | RIBONUCLEASE DOMAIN OF COLICIN E3 IN COMPLEX WITH ITS IMMUNITY PROTEIN                    |
| 1EM8           | A B          | B        | CRYSTAL STRUCTURE OF CHI AND PSI SUBUNIT HETERODIMER FROM DNA POL III                     |
| 1ES7           | A D          | D        | COMPLEX BETWEEN BMP-2 AND TWO BMP RECEPTOR IA ECTODOMAINS                                 |
| 1ES7           | C B          | B        | COMPLEX BETWEEN BMP-2 AND TWO BMP RECEPTOR IA ECTODOMAINS                                 |
| 1EUV           | A B          | A        | X-RAY STRUCTURE OF THE C-TERMINAL ULP1 PROTEASE DOMAIN IN COMPLEX WITH SMT3, THE YEAST O  |
| 1EUV           | A B          | A        | X-RAY STRUCTURE OF THE C-TERMINAL ULP1 PROTEASE DOMAIN IN COMPLEX WITH SMT3, THE YEAST O  |
| 1F47           | B A          | A        | THE BACTERIAL CELL-DIVISION PROTEIN ZIPA AND ITS INTERACTION WITH AN FTSZ FRAGMENT REVEAL |
| 1FM6           | U X          | U        | THE 2.1 ANGSTROM RESOLUTION CRYSTAL STRUCTURE OF THE HETERODIMER OF THE HUMAN RXRALPH     |
| 1FOE           | C D          | C        | CRYSTAL STRUCTURE OF RAC1 IN COMPLEX WITH THE GUANINE NUCLEOTIDE EXCHANGE REGION OF TL    |
| 1FOE           | C D          | C        | CRYSTAL STRUCTURE OF RAC1 IN COMPLEX WITH THE GUANINE NUCLEOTIDE EXCHANGE REGION OF TL    |
| 1FOE           | C D          | C        | CRYSTAL STRUCTURE OF RAC1 IN COMPLEX WITH THE GUANINE NUCLEOTIDE EXCHANGE REGION OF TL    |
| 1FOE           | C D          | D        | CRYSTAL STRUCTURE OF RAC1 IN COMPLEX WITH THE GUANINE NUCLEOTIDE EXCHANGE REGION OF TL    |
| 1FQV           | A B          | A        | INSIGHTS INTO SCF UBIQUITIN LIGASES FROM THE STRUCTURE OF THE SKP1-SKP2 COMPLEX           |
| 1FQV           | E F          | E        | INSIGHTS INTO SCF UBIQUITIN LIGASES FROM THE STRUCTURE OF THE SKP1-SKP2 COMPLEX           |
| 1H2M           | A S          | S        | FACTOR INHIBITING HIF-1 ALPHA IN COMPLEX WITH HIF-1 ALPHA FRAGMENT PEPTIDE                |
| 1H30           | A B          | B        | CRYSTAL STRUCTURE OF THE HUMAN TAF4-TAF12 (TAFII135-TAFII20) COMPLEX                      |
| 1H4L           | A D          | D        | STRUCTURE AND REGULATION OF THE CDK5-P25(NCK5A) COMPLEX                                   |
| 1H59           | A B          | B        | COMPLEX OF IGF1R WITH IGF-1                                                               |
| 1H6K           | A X          | X        | NUCLEAR CAP BINDING COMPLEX                                                               |
| 1HE1           | A C          | A        | CRYSTAL STRUCTURE OF THE COMPLEX BETWEEN THE GAP DOMAIN OF THE PSEUDOMONAS AERUGINOS      |
| 1HH4           | A D          | A        | RAC1-RHO GDI COMPLEX INVOLVED IN NADPH OXIDASE ACTIVATION                                 |
| 1HH4           | B E          | B        | RAC1-RHO GDI COMPLEX INVOLVED IN NADPH OXIDASE ACTIVATION                                 |
| 1HH4           | B E          | E        | RAC1-RHO GDI COMPLEX INVOLVED IN NADPH OXIDASE ACTIVATION                                 |
| 1HV2           | A B          | B        | SOLUTION STRUCTURE OF YEAST ELONGIN C IN COMPLEX WITH A VON HIPPEL-LINDAU PEPTIDE         |
| 1HWM           | A B          | A        | EBULIN, ORTHORHOMBIC CRYSTAL FORM MODEL                                                   |
| 1I7W           | C D          | D        | BETA-CATENIN/PHOSPHORYLATED E-CADHERIN COMPLEX                                            |
| 1IWQ           | A B          | A        | CRYSTAL STRUCTURE OF MARCKS CALMODULIN BINDING DOMAIN PEPTIDE COMPLEXED WITH CA2+/CA1     |
| 1J1D           | B C          | C        | CRYSTAL STRUCTURE OF THE 46KDA DOMAIN OF HUMAN CARDIAC TROPONIN IN THE CA2+ SATURATED I   |
| 1J2J           | A B          | A        | CRYSTAL STRUCTURE OF GGA1 GAT N-TERMINAL REGION IN COMPLEX WITH ARF1 GTP FORM             |
| 1JPW           | B E          | E        | CRYSTAL STRUCTURE OF A HUMAN TCF-4 / BETA-CATENIN COMPLEX                                 |
| 1KBH           | A B          | A        | MUTUAL SYNERGISTIC FOLDING IN THE INTERACTION BETWEEN NUCLEAR RECEPTOR COACTIVATORS C1    |
| 1KI1           | A B          | A        | GUANINE NUCLEOTIDE EXCHANGE REGION OF INTERSECTIN IN COMPLEX WITH CDC42                   |
| 1L2W           | A I          | I        | CRYSTAL STRUCTURE OF THE YERSINIA VIRULENCE EFFECTOR YOPE CHAPERONE-BINDING DOMAIN IN C   |
| 1L8C           | A B          | B        | STRUCTURAL BASIS FOR HIF-1ALPHA/CBP RECOGNITION IN THE CELLULAR HYPOXIC RESPONSE          |
| 1LB1           | C D          | D        | CRYSTAL STRUCTURE OF THE DBL AND PLECKSTRIN HOMOMOLOGY DOMAINS OF DBS IN COMPLEX WITH RI  |
| 1LB1           | E F          | F        | CRYSTAL STRUCTURE OF THE DBL AND PLECKSTRIN HOMOMOLOGY DOMAINS OF DBS IN COMPLEX WITH RI  |
| 1LQB           | B C          | B        | CRYSTAL STRUCTURE OF A HYDROXYLATED HIF-1 ALPHA PEPTIDE BOUND TO THE PVHL/ELONGIN-C/ELOI  |
| 1LQB           | B C          | C        | CRYSTAL STRUCTURE OF A HYDROXYLATED HIF-1 ALPHA PEPTIDE BOUND TO THE PVHL/ELONGIN-C/ELOI  |
| 1LTX           | A R          | A        | STRUCTURE OF RAB ESCORT PROTEIN-1 IN COMPLEX WITH RAB GERANYLGERANYL TRANSFERASE AND 1    |
| 1LTX           | A R          | R        | STRUCTURE OF RAB ESCORT PROTEIN-1 IN COMPLEX WITH RAB GERANYLGERANYL TRANSFERASE AND 1    |
| 1MDU           | A B          | A        | CRYSTAL STRUCTURE OF THE CHICKEN ACTIN TRIMER COMPLEXED WITH HUMAN GELSOLIN SEGMENT 1     |

TABLE S2

Jochim, et al

| A. PDB<br>CODE | E. FUNCTION                                | F. $\Delta\Delta G_{AVG,HELIX}$<br>(KCAL/MOL) | G. $\Delta\Delta G_{SUM,HELIX}$<br>(KCAL/MOL) | H. $\Delta\Delta G_{SUM,CHAIN}$<br>(KCAL/MOL) | I. HELIX<br>CONTRIBUTION |
|----------------|--------------------------------------------|-----------------------------------------------|-----------------------------------------------|-----------------------------------------------|--------------------------|
| 1A00           | CHEMOTAXIS                                 | 2.0                                           | 4.1                                           | 4.1                                           | 100%                     |
| 1A00           | CHEMOTAXIS                                 | 2.2                                           | 4.4                                           | 4.4                                           | 100%                     |
| 1A4Y           | COMPLEX (INHIBITOR/NUCLEASE)               | 2.0                                           | 3.9                                           | 5.1                                           | 76%                      |
| 1A9N           | RNA BINDING PROTEIN/RNA                    | 2.0                                           | 3.9                                           | 3.9                                           | 100%                     |
| 1AY7           | COMPLEX (ENZYME/INHIBITOR)                 | 2.2                                           | 4.4                                           | 7.7                                           | 57%                      |
| 1B0N           | TRANSCRIPTION REGULATOR                    | 2.0                                           | 5.9                                           | 27.4                                          | 22%                      |
| 1B27           | HYDROLASE/HYDROLASE INHIBITOR              | 3.2                                           | 6.3                                           | 11.2                                          | 56%                      |
| 1B9X           | SIGNALING PROTEIN                          | 2.4                                           | 7.2                                           | 18.4                                          | 39%                      |
| 1BDJ           | COMPLEX (CHEMOTAXIS/TRANSFERASE)           | 2.1                                           | 4.1                                           | 8.0                                           | 51%                      |
| 1BXL           | COMPLEX (APOPTOSIS/PEPTIDE)                | 2.4                                           | 4.8                                           | 7.1                                           | 68%                      |
| 1D2Z           | APOPTOSIS                                  | 2.0                                           | 4.0                                           | 5.7                                           | 70%                      |
| 1DE4           | METAL TRANSPORT INHIBITOR/RECEPTOR         | 2.0                                           | 3.9                                           | 14.5                                          | 27%                      |
| 1DML           | DNA BINDING PROTEIN/TRANSFERASE            | 3.8                                           | 7.6                                           | 14.4                                          | 53%                      |
| 1DOA           | CELL CYCLE                                 | 2.0                                           | 6.0                                           | 8.4                                           | 71%                      |
| 1DOA           | CELL CYCLE                                 | 2.3                                           | 4.5                                           | 10.4                                          | 43%                      |
| 1DS6           | SIGNALING PROTEIN                          | 2.5                                           | 4.9                                           | 13.4                                          | 37%                      |
| 1E44           | RIBONUCLEASE                               | 4.0                                           | 8.0                                           | 11.4                                          | 70%                      |
| 1EM8           | GENE REGULATION                            | 3.5                                           | 7.0                                           | 11.5                                          | 61%                      |
| 1ES7           | CYTOKINE                                   | 2.5                                           | 4.9                                           | 4.9                                           | 100%                     |
| 1ES7           | CYTOKINE                                   | 2.1                                           | 4.2                                           | 4.2                                           | 100%                     |
| 1EUV           | HYDROLASE                                  | 3.5                                           | 6.9                                           | 23.4                                          | 29%                      |
| 1EUV           | HYDROLASE                                  | 2.6                                           | 5.1                                           | 23.4                                          | 22%                      |
| 1F47           | CELL CYCLE                                 | 2.3                                           | 4.5                                           | 7.4                                           | 61%                      |
| 1FM6           | TRANSCRIPTION                              | 2.1                                           | 4.2                                           | 5.6                                           | 75%                      |
| 1FOE           | SIGNALING PROTEIN, IMMUNE SYSTEM/SIGNALING | 3.5                                           | 10.6                                          | 24.2                                          | 44%                      |
| 1FOE           | SIGNALING PROTEIN, IMMUNE SYSTEM/SIGNALING | 2.9                                           | 8.6                                           | 24.2                                          | 36%                      |
| 1FOE           | SIGNALING PROTEIN, IMMUNE SYSTEM/SIGNALING | 4.0                                           | 7.8                                           | 24.2                                          | 32%                      |
| 1FOE           | SIGNALING PROTEIN, IMMUNE SYSTEM/SIGNALING | 2.0                                           | 4.0                                           | 32.8                                          | 12%                      |
| 1FQV           | LIGASE                                     | 2.0                                           | 8.1                                           | 11.7                                          | 69%                      |
| 1FQV           | LIGASE                                     | 3.3                                           | 6.6                                           | 12.5                                          | 53%                      |
| 1H2M           | TRANSCRIPTION ACTIVATOR/INHIBITOR          | 2.3                                           | 4.5                                           | 5.5                                           | 82%                      |
| 1H30           | TRANSCRIPTION/TBP-ASSOCIATED FACTORS       | 2.1                                           | 4.1                                           | 14.3                                          | 29%                      |
| 1H4L           | KINASE/KINASE ACTIVATOR                    | 2.8                                           | 5.6                                           | 11.7                                          | 48%                      |
| 1H59           | INSULIN                                    | 2.2                                           | 4.4                                           | 6.1                                           | 72%                      |
| 1H6K           | NUCLEAR PROTEIN                            | 2.2                                           | 4.3                                           | 9.4                                           | 46%                      |
| 1HE1           | SIGNALING PROTEIN                          | 2.4                                           | 4.7                                           | 9.5                                           | 49%                      |
| 1HH4           | SIGNALING PROTEIN/INHIBITOR                | 2.6                                           | 5.1                                           | 9.1                                           | 56%                      |
| 1HH4           | SIGNALING PROTEIN/INHIBITOR                | 2.2                                           | 4.3                                           | 13.6                                          | 32%                      |
| 1HH4           | SIGNALING PROTEIN/INHIBITOR                | 2.2                                           | 4.3                                           | 7.1                                           | 61%                      |
| 1HV2           | SIGNALING PROTEIN                          | 2.2                                           | 4.3                                           | 4.3                                           | 100%                     |
| 1HWM           | HYDROLASE                                  | 2.1                                           | 4.1                                           | 9.2                                           | 45%                      |
| 1I7W           | CELL ADHESION                              | 2.1                                           | 4.1                                           | 22.7                                          | 18%                      |
| 1IWQ           | METAL BINDING PROTEIN/PROTEIN BINDING      | 2.5                                           | 4.9                                           | 22.1                                          | 22%                      |
| 1J1D           | CONTRACTILE PROTEIN                        | 2.0                                           | 4.0                                           | 19.6                                          | 20%                      |
| 1J2J           | PROTEIN TRANSPORT                          | 2.4                                           | 4.7                                           | 8.3                                           | 57%                      |
| 1JPW           | CELL ADHESION                              | 2.1                                           | 4.1                                           | 14.0                                          | 29%                      |
| 1KBH           | TRANSCRIPTION                              | 2.2                                           | 4.3                                           | 7.8                                           | 55%                      |
| 1K1I           | SIGNALING PROTEIN                          | 2.7                                           | 5.3                                           | 7.3                                           | 73%                      |
| 1L2W           | CHAPERONE                                  | 2.1                                           | 4.1                                           | 8.3                                           | 49%                      |
| 1L8C           | GENE REGULATION                            | 2.3                                           | 4.6                                           | 16.8                                          | 27%                      |
| 1LB1           | SIGNALING PROTEIN                          | 2.1                                           | 4.1                                           | 16.3                                          | 25%                      |
| 1LB1           | SIGNALING PROTEIN                          | 2.0                                           | 3.9                                           | 10.6                                          | 37%                      |
| 1LQB           | GENE REGULATION                            | 2.3                                           | 4.5                                           | 13.8                                          | 33%                      |
| 1LQB           | GENE REGULATION                            | 2.5                                           | 7.6                                           | 10.6                                          | 72%                      |
| 1LTX           | TRANSFERASE/PROTEIN BINDING                | 2.4                                           | 4.7                                           | 6.6                                           | 71%                      |
| 1LTX           | TRANSFERASE/PROTEIN BINDING                | 3.2                                           | 6.3                                           | 9.7                                           | 65%                      |
| 1MDU           | STRUCTURAL PROTEIN                         | 2.2                                           | 6.5                                           | 11.0                                          | 59%                      |

TABLE S2

Jochim, et al

| A. PDB CODE | J. # HOTSPOT RESIDUES | K. HOTSPOT RESIDUES, RESIDUE #, $\Delta\Delta G$ (KCAL/MOL) | L. HOTSPOT RESIDUE HELIX POSITIONS | M. HOTSPOT RESIDUE END TO END LENGTH |
|-------------|-----------------------|-------------------------------------------------------------|------------------------------------|--------------------------------------|
| 1A0O        | 2                     | K122, 2.0; E125, 2.0;                                       | i; i+3;                            | 4                                    |
| 1A0O        | 2                     | V211, 1.1; F214, 3.3;                                       | i; i+3;                            | 4                                    |
| 1A4Y        | 2                     | R5, 1.9; H8, 2.0;                                           | i; i+3;                            | 4                                    |
| 1A9N        | 2                     | R28, 1.8; Y31, 2.1;                                         | i; i+3;                            | 4                                    |
| 1AY7        | 2                     | D35, 1.5; D39, 2.9;                                         | i; i+4;                            | 5                                    |
| 1B0N        | 3                     | I32, 1.1; Y35, 2.6; L36, 2.2;                               | i; i+3; i+4;                       | 5                                    |
| 1B27        | 2                     | D36, 1.5; D40, 4.8;                                         | i; i+4;                            | 5                                    |
| 1B9X        | 3                     | F540, 3.8; Y543, 2.4; V544, 1.0;                            | i; i+3; i+4;                       | 5                                    |
| 1BDJ        | 2                     | E750, 1.3; E754, 2.8;                                       | i; i+4;                            | 5                                    |
| 1BXL        | 2                     | L578, 2.7; I581, 2.1;                                       | i; i+3;                            | 4                                    |
| 1D2Z        | 2                     | N112, 1.6; R115, 2.4;                                       | i; i+3;                            | 4                                    |
| 1DE4        | 2                     | E146, 1.6; H150, 2.3;                                       | i; i+4;                            | 5                                    |
| 1DML        | 2                     | F1231, 5.2; L1234, 2.4;                                     | i; i+3;                            | 4                                    |
| 1DOA        | 3                     | R66, 2.8; L67, 2.2; R68, 1.0;                               | i; i+1; i+2;                       | 3                                    |
| 1DOA        | 2                     | Y51, 2.8; L55, 1.7;                                         | i; i+4;                            | 5                                    |
| 1DS6        | 2                     | R66, 1.6; L67, 3.3;                                         | i; i+1;                            | 2                                    |
| 1E44        | 2                     | F2, 5.4; Y5, 2.6;                                           | i; i+3;                            | 4                                    |
| 1EM8        | 2                     | R118, 1.6; W122, 5.4;                                       | i; i+4;                            | 5                                    |
| 1ES7        | 2                     | F785, 3.3; K788, 1.6;                                       | i; i+3;                            | 4                                    |
| 1ES7        | 2                     | F285, 2.6; K288, 1.6;                                       | i; i+3;                            | 4                                    |
| 1EUV        | 2                     | D451, 4.6; E455, 2.3;                                       | i; i+4;                            | 5                                    |
| 1EUV        | 2                     | F474, 3.3; T477, 1.8;                                       | i; i+3;                            | 4                                    |
| 1F47        | 2                     | F11, 2.1; I8, 2.4;                                          | i; i+3;                            | 4                                    |
| 1FM6        | 2                     | E394, 1.2; Y397, 3.0;                                       | i; i+3;                            | 4                                    |
| 1FOE        | 3                     | K1195, 4.4; L1198, 5.0; L1199, 1.2;                         | i; i+3; i+4;                       | 5                                    |
| 1FOE        | 3                     | I1187, 1.2; I1190, 3.6; Q1191, 3.8;                         | i; i+3; i+4;                       | 5                                    |
| 1FOE        | 2                     | I1231, 3.7; N1232, 4.1;                                     | i; i+1;                            | 2                                    |
| 1FOE        | 2                     | R66, 2.1; L67, 1.9;                                         | i; i+1;                            | 2                                    |
| 1FQV        | 4                     | K137, 1.9; R138, 1.2; W139, 2.5; Y140, 2.5;                 | i; i+1; i+2; i+3;                  | 4                                    |
| 1FQV        | 2                     | K131, 2.8; S133, 3.8;                                       | i; i+2;                            | 3                                    |
| 1H2M        | 2                     | L818, 2.1; L819, 2.4;                                       | i; i+1;                            | 2                                    |
| 1H3O        | 2                     | L66, 2.6; V70, 1.5;                                         | i; i+4;                            | 5                                    |
| 1H4L        | 2                     | W258, 3.2; L262, 2.4;                                       | i; i+4;                            | 5                                    |
| 1H59        | 2                     | L70, 3.1; L74, 1.3;                                         | i; i+4;                            | 5                                    |
| 1H6K        | 2                     | Y100, 2.6; R99, 1.7;                                        | i; i+1;                            | 2                                    |
| 1HE1        | 2                     | Q182, 2.0; Q183, 2.7;                                       | i; i+1;                            | 2                                    |
| 1HH4        | 2                     | H103, 3.1; H104, 2.0;                                       | i; i+1;                            | 2                                    |
| 1HH4        | 2                     | R66, 2.4; L67, 1.9;                                         | i; i+1;                            | 2                                    |
| 1HH4        | 2                     | Y351, 2.5; L355, 1.8;                                       | i; i+4;                            | 5                                    |
| 1HV2        | 2                     | L158, 3.2; R161, 1.1;                                       | i; i+3;                            | 4                                    |
| 1HWM        | 2                     | E235, 2.8; I239, 1.3;                                       | i; i+4;                            | 5                                    |
| 1I7W        | 2                     | K717, 1.1; L718, 3.0;                                       | i; i+1;                            | 2                                    |
| 1IWQ        | 2                     | L105, 1.2; M109, 3.7;                                       | i; i+4;                            | 5                                    |
| 1J1D        | 2                     | K72, 2.9; L76, 1.1;                                         | i; i+4;                            | 5                                    |
| 1J2J        | 2                     | L77, 2.7; H80, 2.0;                                         | i; i+3;                            | 4                                    |
| 1JPW        | 2                     | V44, 2.0; K45, 2.1;                                         | i; i+1;                            | 2                                    |
| 1KBH        | 2                     | I34, 3.0; V38, 1.3;                                         | i; i+4;                            | 5                                    |
| 1KI1        | 2                     | L67, 3.0; L70, 2.3;                                         | i; i+3;                            | 4                                    |
| 1L2W        | 2                     | Y39, 1.9; L43, 2.2;                                         | i; i+4;                            | 5                                    |
| 1L8C        | 2                     | L141, 2.4; L145, 2.2;                                       | i; i+4;                            | 5                                    |
| 1LB1        | 2                     | L69, 1.9; L72, 2.2;                                         | i; i+3;                            | 4                                    |
| 1LB1        | 2                     | H105, 2.0; F106, 1.9;                                       | i; i+1;                            | 2                                    |
| 1LQB        | 2                     | L101, 1.4; L104, 3.1;                                       | i; i+3;                            | 4                                    |
| 1LQB        | 3                     | L158, 3.5; K159, 1.2; R161, 2.9;                            | i; i+1; i+3;                       | 4                                    |
| 1LTX        | 2                     | Q216, 2.4; F220, 2.3;                                       | i; i+4;                            | 5                                    |
| 1LTX        | 2                     | R275, 3.5; F279, 2.8;                                       | i; i+4;                            | 5                                    |
| 1MDU        | 3                     | I79, 2.3; F80, 3.2; V82, 1.0;                               | i; i+1; i+3;                       | 4                                    |

TABLE S2

| A. PDB CODE | N. HELIX LENGTH | O. HELIX START RESIDUE # | P. HELIX END RESIDUE # | Q. HELIX SEQUENCE        | R. RESOLUTION |
|-------------|-----------------|--------------------------|------------------------|--------------------------|---------------|
| 1A00        | 14              | 113                      | 126                    | AATLEEKLNKIFEK           | 2.95          |
| 1A00        | 12              | 205                      | 216                    | EDDITAVLCFVI             | 2.95          |
| 1A4Y        | 9               | 5                        | 13                     | RYTHFLTQH                | 2.00          |
| 1A9N        | 12              | 23                       | 34                     | KEELKRSLYALF             | 2.38          |
| 1AY7        | 9               | 34                       | 42                     | LDALWDCLT                | 1.70          |
| 1B0N        | 11              | 29                       | 39                     | PEEIRKYLLLN              | 1.90          |
| 1B27        | 9               | 35                       | 43                     | LDALWDALT                | 2.10          |
| 1B9X        | 14              | 533                      | 546                    | VSKCCEEFRDYVEE           | 3.00          |
| 1BDJ        | 15              | 744                      | 758                    | WEDNVGEWIEEMKEE          | 2.68          |
| 1BXL        | 9               | 576                      | 584                    | RQLAIGDD                 | NOT APP       |
| 1D2Z        | 7               | 111                      | 117                    | HNAMRLI                  | 2.00          |
| 1DE4        | 12              | 140                      | 151                    | AWPTKLEWERHK             | 2.80          |
| 1DML        | 16              | 1220                     | 1235                   | AEETRRMLHRAFDTLA         | 2.70          |
| 1DOA        | 5               | 65                       | 69                     | DRLRP                    | 2.60          |
| 1DOA        | 12              | 46                       | 57                     | ESLRKYKEALLG             | 2.60          |
| 1DS6        | 5               | 65                       | 69                     | DRLRP                    | 2.35          |
| 1E44        | 6               | 2                        | 7                      | FKDYGH                   | 2.40          |
| 1EM8        | 14              | 115                      | 128                    | PTARAALWQQICTY           | 2.10          |
| 1ES7        | 7               | 783                      | 789                    | SDFQCKD                  | 2.90          |
| 1ES7        | 7               | 283                      | 289                    | SDFQCKD                  | 2.90          |
| 1EUV        | 14              | 451                      | 464                    | DTIIEFFMKYIEKS           | 1.60          |
| 1EUV        | 10              | 473                      | 482                    | SFFYTNLSER               | 1.60          |
| 1F47        | 9               | 8                        | 16                     | IPAFLRKQA                | 1.95          |
| 1FM6        | 23              | 386                      | 408                    | PAEVEALREKVVYASLEAYCKHKY | 2.10          |
| 1FOE        | 12              | 1195                     | 1206                   | KYPLLLRELFAL             | 2.80          |
| 1FOE        | 8               | 1187                     | 1194                   | IKPIQRVL                 | 2.80          |
| 1FOE        | 8               | 1226                     | 1233                   | KVASHINE                 | 2.80          |
| 1FOE        | 5               | 65                       | 69                     | DRLRP                    | 2.80          |
| 1FQV        | 8               | 137                      | 144                    | KRWYRLAS                 | 2.80          |
| 1FQV        | 9               | 126                      | 134                    | LPELLKVSG                | 2.80          |
| 1H2M        | 7               | 816                      | 822                    | EELLRAL                  | 2.50          |
| 1H3O        | 12              | 60                       | 71                     | KKKLQDLVREVD             | 2.30          |
| 1H4L        | 15              | 254                      | 268                    | KEAFWDRCLSVINLM          | 2.65          |
| 1H59        | 7               | 69                       | 75                     | PLHALLH                  | 2.10          |
| 1H6K        | 12              | 91                       | 102                    | RADAENAMRYIN             | 2.00          |
| 1HE1        | 5               | 181                      | 185                    | LQQWG                    | 2.00          |
| 1HH4        | 13              | 93                       | 105                    | VRAKWYPEVRHHC            | 2.70          |
| 1HH4        | 5               | 65                       | 69                     | DRLRP                    | 2.70          |
| 1HH4        | 12              | 346                      | 357                    | ESLRKYKEALLG             | 2.70          |
| 1HV2        | 14              | 158                      | 171                    | LKERCLQVVRSLVK           | NOT APP       |
| 1HWM        | 9               | 233                      | 241                    | FEELYKITG                | 2.80          |
| 1I7W        | 7               | 716                      | 722                    | KKLADMY                  | 2.00          |
| 1IWQ        | 11              | 102                      | 112                    | AAELRHVMTNL              | 2.00          |
| 1J1D        | 18              | 63                       | 80                     | REAEERRGEKGRALSTRA       | 2.61          |
| 1J2J        | 7               | 75                       | 81                     | RPLWRHY                  | 1.60          |
| 1JPW        | 6               | 42                       | 47                     | ADVKSS                   | 2.50          |
| 1KBH        | 8               | 34                       | 41                     | IPELVNQG                 | NOT APP       |
| 1KI1        | 7               | 67                       | 73                     | LRPLSYP                  | 2.30          |
| 1L2W        | 8               | 38                       | 45                     | QYANNLAG                 | 2.00          |
| 1L8C        | 11              | 139                      | 149                    | EELLRALDQVN              | NOT APP       |
| 1LB1        | 7               | 69                       | 75                     | LRPLSYP                  | 2.81          |
| 1LB1        | 19              | 89                       | 107                    | PDSLENIPEKWTPVKHFC       | 2.81          |
| 1LQB        | 11              | 100                      | 110                    | ALELLMAANFL              | 2.00          |
| 1LQB        | 11              | 158                      | 168                    | LKERCLQVVR               | 2.00          |
| 1LTX        | 18              | 205                      | 222                    | ENVLLKELELVQNAFFTD       | 2.70          |
| 1LTX        | 7               | 275                      | 281                    | RADVFNS                  | 2.70          |
| 1MDU        | 18              | 71                       | 88                     | QDESAAAAIFTVQLDDYL       | 2.20          |

TABLE S2

Jochim, et al

| A. PDB<br>CODE | B. INTERFACE |          | D. TITLE                                                                                   |
|----------------|--------------|----------|--------------------------------------------------------------------------------------------|
|                | CHAINS       | C. CHAIN |                                                                                            |
| 1MF8           | AB           | A        | CRYSTAL STRUCTURE OF HUMAN CALCINEURIN COMPLEXED WITH CYCLOSPORIN A AND HUMAN CYCLO        |
| 1MZN           | CD           | D        | CRYSTAL STRUCTURE AT 1.9 ANGSTROMS RESOLUTION OF THE HOMODIMER OF HUMAN RXR ALPHA LIG      |
| 1N1J           | AB           | B        | CRYSTAL STRUCTURE OF THE NF-YB/NF-YC HISTONE PAIR                                          |
| 1NRL           | BD           | D        | CRYSTAL STRUCTURE OF THE HUMAN PXR-LBD IN COMPLEX WITH AN SRC-1 COACTIVATOR PEPTIDE AND    |
| 1NU7           | EF           | E        | STAPHYLOCOAGULASE-THROMBIN COMPLEX                                                         |
| 1OL5           | AB           | B        | STRUCTURE OF AURORA-A 122-403, PHOSPHORYLATED ON THR287, THR288 AND BOUND TO TPX2 1-43     |
| 1OOK           | AB           | A        | CRYSTAL STRUCTURE OF THE COMPLEX OF PLATELET RECEPTOR GPIIb/IIIa AND HUMAN ALPHA-THRC      |
| 1OR7           | AC           | A        | CRYSTAL STRUCTURE OF ESCHERICHIA COLI SIGMAE WITH THE CYTOPLASMIC DOMAIN OF ITS ANTI-SIG   |
| 1OR7           | AC           | A        | CRYSTAL STRUCTURE OF ESCHERICHIA COLI SIGMAE WITH THE CYTOPLASMIC DOMAIN OF ITS ANTI-SIG   |
| 1OSV           | BD           | D        | STRUCTURAL BASIS FOR BILE ACID BINDING AND ACTIVATION OF THE NUCLEAR RECEPTOR FXR          |
| 1QLS           | AD           | D        | S100C (S100A11), OR CALGIZZARIN, IN COMPLEX WITH ANNEXIN I N-TERMINUS                      |
| 1R4A           | AE           | E        | CRYSTAL STRUCTURE OF GTP-BOUND ADP-RIBOSYLATION FACTOR LIKE PROTEIN 1 (ARL1) AND GRIP DOM  |
| 1R8Q           | AE           | A        | FULL-LENGTH ARF1-GDP-MG IN COMPLEX WITH BREFELDIN A AND A SEC7 DOMAIN                      |
| 1RP3           | AB           | B        | COCRYSTAL STRUCTURE OF THE FLAGELLAR SIGMA/ANTI-SIGMA COMPLEX, SIGMA-28/FLGM               |
| 1T0F           | BD           | D        | CRYSTAL STRUCTURE OF THE TNSA/TNSC(504-555) COMPLEX                                        |
| 1TTW           | AB           | B        | CRYSTAL STRUCTURE OF THE YERSINIA PESTIS TYPE III SECRETION CHAPERONE SYCH IN COMPLEX WITH |
| 1TUE           | AB           | B        | THE X-RAY STRUCTURE OF THE PAPILLOMAVIRUS HELICASE IN COMPLEX WITH ITS MOLECULAR MATCHI    |
| 1TUE           | HJ           | H        | THE X-RAY STRUCTURE OF THE PAPILLOMAVIRUS HELICASE IN COMPLEX WITH ITS MOLECULAR MATCHI    |
| 1TY4           | AC           | C        | CRYSTAL STRUCTURE OF A CED-9/EGL-1 COMPLEX                                                 |
| 1U0S           | YA           | A        | CHEMOTAXIS KINASE CHEA P2 DOMAIN IN COMPLEX WITH RESPONSE REGULATOR CHEY FROM THE THEI     |
| 1U0S           | YA           | Y        | CHEMOTAXIS KINASE CHEA P2 DOMAIN IN COMPLEX WITH RESPONSE REGULATOR CHEY FROM THE THEI     |
| 1U7B           | AB           | B        | CRYSTAL STRUCTURE OF HPCNA BOUND TO RESIDUES 331-350 OF THE FLAP ENDONUCLEASE-1 (FEN1)     |
| 1U8T           | BF           | F        | CRYSTAL STRUCTURE OF CHEY D13K Y106W ALONE AND IN COMPLEX WITH A FLIM PEPTIDE              |
| 1VCB           | BC           | B        | THE VHL-ELONGIN-C-ELONGIN-B STRUCTURE                                                      |
| 1X86           | GH           | H        | CRYSTAL STRUCTURE OF THE DH/PH DOMAINS OF LEUKEMIA-ASSOCIATED RHOGEF IN COMPLEX WITH R     |
| 1XCG           | AB           | B        | CRYSTAL STRUCTURE OF HUMAN RHOA IN COMPLEX WITH DH/PH FRAGMENT OF PDZRHOGEF                |
| 1XIU           | AE           | E        | CRYSTAL STRUCTURE OF THE AGONIST-BOUND LIGAND-BINDING DOMAIN OF BIOPHALARIA GLABRATA       |
| 1XL3           | AC           | A        | COMPLEX STRUCTURE OF Y. PESTIS VIRULENCE FACTORS YOPN AND TYEA                             |
| 1XLS           | AE           | A        | CRYSTAL STRUCTURE OF THE MOUSE CAR/RXR LBD HETERODIMER BOUND TO TCPOBOP AND 9CRA AND /     |
| 1XV9           | CG           | G        | CRYSTAL STRUCTURE OF CAR/RXR HETERODIMER BOUND WITH SRC1 PEPTIDE, FATTY ACID, AND 5B-PRE   |
| 1Y3A           | AE           | E        | STRUCTURE OF G-ALPHA-I1 BOUND TO A GDP-SELECTIVE PEPTIDE PROVIDES INSIGHT INTO GUANINE NU  |
| 1YCR           | AB           | B        | MDM2 BOUND TO THE TRANSACTIVATION DOMAIN OF P53                                            |
| 1YOK           | AB           | B        | CRYSTAL STRUCTURE OF HUMAN LRH-1 BOUND WITH TIF-2 PEPTIDE AND PHOSPHATIDYLGLYCEROL         |
| 1Z2C           | AB           | A        | CRYSTAL STRUCTURE OF MDIA1 GBD-FH3 IN COMPLEX WITH RHOC- GMPPNP                            |
| 1Z56           | AC           | A        | CO-CRYSTAL STRUCTURE OF LIF1P-LIG4P                                                        |
| 1ZNV           | CD           | C        | HOW A HIS-METAL FINGER ENDONUCLEASE COLE7 BINDS AND CLEAVES DNA WITH A TRANSITION METAL    |
| 1ZOQ           | AC           | C        | IRF3-CBP COMPLEX                                                                           |
| 1ZOQ           | BD           | D        | IRF3-CBP COMPLEX                                                                           |
| 1ZVV           | BP           | P        | CRYSTAL STRUCTURE OF A CCPA-CRH-DNA COMPLEX                                                |
| 2A19           | AB           | B        | PKR KINASE DOMAIN- EIF2ALPHA- AMP-PNP COMPLEX.                                             |
| 2A45           | AB           | A        | CRYSTAL STRUCTURE OF THE COMPLEX BETWEEN THROMBIN AND THE CENTRAL "E" REGION OF FIBRIN     |
| 2A4J           | AB           | B        | SOLUTION STRUCTURE OF THE C-TERMINAL DOMAIN (T94-Y172) OF THE HUMAN CENTRIN 2 IN COMPLEX   |
| 2AGH           | BC           | C        | STRUCTURAL BASIS FOR COOPERATIVE TRANSCRIPTION FACTOR BINDING TO THE CBP COACTIVATOR       |
| 2B5L           | AC           | C        | CRYSTAL STRUCTURE OF DDB1 IN COMPLEX WITH SIMIAN VIRUS 5 V PROTEIN                         |
| 2C9W           | AC           | C        | CRYSTAL STRUCTURE OF SOCS-2 IN COMPLEX WITH ELONGIN-B AND ELONGIN-C AT 1.9A RESOLUTION     |
| 2CCL           | CD           | D        | THE S45A, T46A MUTANT OF THE TYPE I COHESIN-DOCKERIN COMPLEX FROM THE CELLULOSOME OF CLC   |
| 2DWZ           | AB           | B        | STRUCTURE OF THE ONCOPROTEIN GANKYRIN IN COMPLEX WITH S6 ATPASE OF THE 26S PROTEASOME      |
| 2EHB           | AD           | D        | THE STRUCTURE OF THE C-TERMINAL DOMAIN OF THE PROTEIN KINASE ATSO2 BOUND TO THE CALCIUM    |
| 2EKV           | AB           | A        | THE CRYSTAL STRUCTURE OF RIGOR LIKE SQUID MYOSIN S1 IN THE ABSENCE OF NUCLEOTIDE           |
| 2EKV           | AB           | A        | THE CRYSTAL STRUCTURE OF RIGOR LIKE SQUID MYOSIN S1 IN THE ABSENCE OF NUCLEOTIDE           |
| 2ERJ           | FH           | H        | CRYSTAL STRUCTURE OF THE HETEROTRIMERIC INTERLEUKIN-2 RECEPTOR IN COMPLEX WITH INTERLEU    |
| 2F93           | AB           | B        | K INTERMEDIATE STRUCTURE OF SENSORY RHODOPSIN II/TRANSDUCER COMPLEX IN COMBINATION WIT     |
| 2FM8           | BC           | C        | CRYSTAL STRUCTURE OF THE SALMONELLA SECRETION CHAPERONE INVb IN COMPLEX WITH SIPA          |
| 2FNJ           | AC           | A        | CRYSTAL STRUCTURE OF A B30.2/SPRY DOMAIN-CONTAINING PROTEIN GUSTAVUS IN COMPLEX WITH ELO   |
| 2FO1           | DE           | D        | CRYSTAL STRUCTURE OF THE CSL-NOTCH-MASTERMIND TERNARY COMPLEX BOUND TO DNA                 |
| 2FO1           | BD           | D        | SYNTHESIS, BIOLOGICAL ACTIVITY, AND X-RAY CRYSTAL STRUCTURAL ANALYSIS OF DIARYL ETHER INH  |
| 2G30           | AP           | P        | BETA APPENDAGE OF AP2 COMPLEXED WITH ARH PEPTIDE                                           |

TABLE S2

Jochim, et al

| A. PDB<br>CODE | E. FUNCTION                              | F. $\Delta\Delta G_{AVG,HELIX}$<br>(KCAL/MOL) | G. $\Delta\Delta G_{SUM,HELIX}$<br>(KCAL/MOL) | H. $\Delta\Delta G_{SUM,CHAIN}$<br>(KCAL/MOL) | I. HELIX<br>CONTRIBUTION |
|----------------|------------------------------------------|-----------------------------------------------|-----------------------------------------------|-----------------------------------------------|--------------------------|
| 1MF8           | HYDROLASE, LIGASE                        | 2.9                                           | 8.6                                           | 33.6                                          | 26%                      |
| 1MZN           | TRANSCRIPTION                            | 2.1                                           | 6.2                                           | 7.8                                           | 79%                      |
| 1N1J           | DNA BINDING PROTEIN                      | 2.6                                           | 5.1                                           | 43.7                                          | 12%                      |
| 1NRL           | TRANSCRIPTION                            | 2.0                                           | 6.0                                           | 6.0                                           | 100%                     |
| 1NU7           | HYDROLASE/PROTEIN BINDING                | 2.2                                           | 4.3                                           | 5.3                                           | 81%                      |
| 1OL5           | TRANSFERASE/CELL CYCLE                   | 3.0                                           | 6.0                                           | 18.6                                          | 32%                      |
| 1OOK           | HYDROLASE                                | 2.1                                           | 6.2                                           | 15.3                                          | 41%                      |
| 1OR7           | TRANSCRIPTION                            | 2.2                                           | 4.4                                           | 31.9                                          | 14%                      |
| 1OR7           | TRANSCRIPTION                            | 2.0                                           | 4.0                                           | 31.9                                          | 13%                      |
| 1OSV           | DNA BINDING PROTEIN                      | 2.3                                           | 4.6                                           | 4.6                                           | 100%                     |
| 1QLS           | METAL-BINDING PROTEIN/INHIBITOR          | 7.8                                           | 15.5                                          | 15.5                                          | 100%                     |
| 1R4A           | PROTEIN TRANSPORT                        | 2.1                                           | 4.2                                           | 10.5                                          | 40%                      |
| 1R8Q           | PROTEIN TRANSPORT/EXCHANGE FACTOR        | 2.5                                           | 4.9                                           | 14.3                                          | 34%                      |
| 1RP3           | TRANSCRIPTION                            | 2.2                                           | 4.4                                           | 31.0                                          | 14%                      |
| 1T0F           | DNA BINDING PROTEIN                      | 2.2                                           | 4.4                                           | 18.9                                          | 23%                      |
| 1TTW           | CHAPERONE                                | 2.2                                           | 4.3                                           | 11.4                                          | 38%                      |
| 1TUE           | REPLICATION                              | 2.7                                           | 8.1                                           | 13.8                                          | 59%                      |
| 1TUE           | REPLICATION                              | 2.5                                           | 5.0                                           | 16.6                                          | 30%                      |
| 1TY4           | APOPTOSIS                                | 2.0                                           | 6.0                                           | 13.8                                          | 43%                      |
| 1U0S           | SIGNALING PROTEIN                        | 2.5                                           | 7.4                                           | 7.4                                           | 100%                     |
| 1U0S           | SIGNALING PROTEIN                        | 2.1                                           | 4.1                                           | 13.7                                          | 30%                      |
| 1U7B           | REPLICATION                              | 3.0                                           | 6.0                                           | 6.0                                           | 100%                     |
| 1U8T           | SIGNALING PROTEIN                        | 2.0                                           | 5.9                                           | 7.6                                           | 78%                      |
| 1VCB           | TRANSCRIPTION                            | 2.1                                           | 4.1                                           | 10.1                                          | 41%                      |
| 1X86           | SIGNALING PROTEIN/MEMBRANE PROTEIN       | 3.1                                           | 6.1                                           | 14.8                                          | 41%                      |
| 1XCG           | SIGNALING PROTEIN ACTIVATOR/SIGNALING PR | 2.9                                           | 5.8                                           | 18.5                                          | 31%                      |
| 1XIU           | TRANSCRIPTION/TRANSFERASE                | 2.2                                           | 8.8                                           | 8.8                                           | 100%                     |
| 1XL3           | CELL INVASION                            | 4.0                                           | 12.0                                          | 16.6                                          | 72%                      |
| 1XLS           | TRANSCRIPTION                            | 3.3                                           | 6.6                                           | 9.5                                           | 69%                      |
| 1XV9           | DNA BINDING PROTEIN                      | 2.7                                           | 5.4                                           | 6.4                                           | 84%                      |
| 1Y3A           | SIGNALING PROTEIN                        | 3.1                                           | 9.3                                           | 9.3                                           | 100%                     |
| 1YCR           | COMPLEX (ONCOGENE PROTEIN/PEPTIDE)       | 3.7                                           | 11.1                                          | 12.9                                          | 86%                      |
| 1YOK           | TRANSCRIPTION                            | 2.8                                           | 8.3                                           | 8.3                                           | 100%                     |
| 1Z2C           | SIGNALING PROTEIN                        | 2.6                                           | 5.1                                           | 15.1                                          | 34%                      |
| 1Z56           | LIGASE                                   | 4.3                                           | 12.9                                          | 12.9                                          | 100%                     |
| 1ZNV           | HYDROLASE/PROTEIN BINDING                | 2.5                                           | 4.9                                           | 9.5                                           | 52%                      |
| 1ZOQ           | TRANSCRIPTION/TRANSFERASE                | 2.1                                           | 4.2                                           | 7.6                                           | 55%                      |
| 1ZOQ           | TRANSCRIPTION/TRANSFERASE                | 2.0                                           | 4.0                                           | 8.2                                           | 49%                      |
| 1ZVV           | TRANSCRIPTION/DNA                        | 2.2                                           | 4.4                                           | 4.4                                           | 100%                     |
| 2A19           | PROTEIN SYNTHESIS/TRANSFERASE            | 3.4                                           | 6.7                                           | 6.7                                           | 100%                     |
| 2A45           | BLOOD CLOTTING                           | 2.1                                           | 4.1                                           | 4.1                                           | 100%                     |
| 2A4J           | STRUCTURAL PROTEIN                       | 3.1                                           | 6.2                                           | 14.7                                          | 42%                      |
| 2AGH           | TRANSCRIPTION                            | 2.3                                           | 6.9                                           | 8.2                                           | 84%                      |
| 2B5L           | PROTEIN BINDING/VIRAL PROTEIN            | 2.4                                           | 4.7                                           | 8.4                                           | 56%                      |
| 2C9W           | TRANSCRIPTION REGULATION                 | 2.1                                           | 6.3                                           | 9.1                                           | 69%                      |
| 2CCL           | CELL ADHESION                            | 2.8                                           | 5.6                                           | 8.3                                           | 67%                      |
| 2DWZ           | ONCOPROTEIN                              | 2.4                                           | 7.2                                           | 12.5                                          | 58%                      |
| 2EHB           | SIGNALING PROTEIN/TRANSFERASE            | 3.0                                           | 8.9                                           | 17.9                                          | 50%                      |
| 2EKV           | CONTRACTILE PROTEIN                      | 2.9                                           | 8.6                                           | 16.3                                          | 53%                      |
| 2EKV           | CONTRACTILE PROTEIN                      | 3.0                                           | 5.9                                           | 16.3                                          | 36%                      |
| 2ERJ           | IMMUNE SYSTEM/CYTOKINE                   | 2.0                                           | 3.9                                           | 9.7                                           | 40%                      |
| 2F93           | MEMBRANE PROTEIN                         | 2.2                                           | 4.3                                           | 7.2                                           | 60%                      |
| 2FM8           | CHAPERONE/CELL INVASION                  | 2.2                                           | 4.3                                           | 4.3                                           | 100%                     |
| 2FNJ           | PROTEIN TRANSPORT/SIGNALING PROTEIN      | 3.1                                           | 6.1                                           | 6.1                                           | 100%                     |
| 2FO1           | GENE REGULATION/SIGNALING PROTEIN/DNA    | 2.2                                           | 4.3                                           | 5.3                                           | 81%                      |
| 2FO1           | OXIDOREDUCTASE                           | 2.9                                           | 5.7                                           | 8.9                                           | 64%                      |
| 2G30           | ENDOCYTOSIS/EXOCYTOSIS                   | 3.3                                           | 6.6                                           | 11.1                                          | 59%                      |

TABLE S2

Jochim, et al

| A. PDB CODE | J. # HOTSPOT RESIDUES | K. HOTSPOT RESIDUES, RESIDUE #, $\Delta\Delta G$ (KCAL/MOL) | L. HOTSPOT RESIDUE HELIX POSITIONS | M. HOTSPOT RESIDUE END TO END LENGTH |
|-------------|-----------------------|-------------------------------------------------------------|------------------------------------|--------------------------------------|
| 1MF8        | 3                     | F350, 4.8; W352, 1.4; L354, 2.4;                            | i; i+2; i+4;                       | 5                                    |
| 1MZN        | 3                     | L1475, 2.2; L1478, 1.4; L1479, 2.6;                         | i; i+3; i+4;                       | 5                                    |
| 1NIJ        | 2                     | R47, 1.5; I51, 3.6;                                         | i; i+4;                            | 5                                    |
| 1NRL        | 3                     | L690, 2.6; H691, 1.0; L694, 2.4;                            | i; i+1; i+4;                       | 5                                    |
| 1NU7        | 2                     | E14, 2.6; L14, 1.7;                                         | i; i+1;                            | 2                                    |
| 1OL5        | 2                     | W34, 2.8; F35, 3.2;                                         | i; i+1;                            | 2                                    |
| 1OOK        | 3                     | E14, 1.9; E14, 2.3; L14, 2.0;                               | i; 1; 1;                           | 4                                    |
| 1OR7        | 2                     | R171, 1.3; F175, 3.1;                                       | i; i+4;                            | 5                                    |
| 1OR7        | 2                     | F22, 1.3; L24, 2.7;                                         | i; i+2;                            | 3                                    |
| 1OSV        | 2                     | L5, 3.3; R6, 1.3;                                           | i; i+1;                            | 2                                    |
| 1QLS        | 2                     | F6, 1.0; L7, 14.5;                                          | i; i+1;                            | 2                                    |
| 1R4A        | 2                     | E2174, 1.3; Y2177, 2.9;                                     | i; i+3;                            | 4                                    |
| 1R8Q        | 2                     | L77, 3.0; Y81, 1.9;                                         | i; i+4;                            | 5                                    |
| 1RP3        | 2                     | V60, 1.6; K64, 2.8;                                         | i; i+4;                            | 5                                    |
| 1T0F        | 2                     | L521, 1.5; R522, 2.9;                                       | i; i+1;                            | 2                                    |
| 1TTW        | 2                     | F45, 1.9; V49, 2.4;                                         | i; i+4;                            | 5                                    |
| 1TUE        | 3                     | I20, 1.7; Y23, 4.9; E24, 1.5;                               | i; i+3; i+4;                       | 5                                    |
| 1TUE        | 2                     | F460, 2.8; I461, 2.2;                                       | i; i+1;                            | 2                                    |
| 1TY4        | 3                     | D63, 2.5; F65, 2.5; D66, 1.0;                               | i; i+2; i+3;                       | 4                                    |
| 1U0S        | 3                     | R195, 2.5; Y197, 2.9; L198, 2.0;                            | i; i+2; i+3;                       | 4                                    |
| 1U0S        | 2                     | I91, 2.2; I94, 1.9;                                         | i; i+3;                            | 4                                    |
| 1U7B        | 2                     | L340, 2.8; F343, 3.2;                                       | i; i+3;                            | 4                                    |
| 1U8T        | 3                     | I11, 2.0; D12, 1.5; Q8, 2.4;                                | i; i+3; i+4;                       | 5                                    |
| 1VCB        | 2                     | L101, 1.5; L104, 2.6;                                       | i; i+3;                            | 4                                    |
| 1X86        | 2                     | D67, 3.5; L69, 2.6;                                         | i; i+2;                            | 3                                    |
| 1XCG        | 2                     | L69, 3.7; L72, 2.1;                                         | i; i+3;                            | 4                                    |
| 1XIU        | 4                     | L690, 1.8; H691, 2.2; L693, 1.9; L694, 2.9;                 | i; i+1; i+3; i+4;                  | 5                                    |
| 1XL3        | 3                     | F278, 4.7; W279, 4.4; F282, 2.9;                            | i; i+1; i+4;                       | 5                                    |
| 1XLS        | 2                     | R426, 2.0; S427, 4.6;                                       | i; i+1;                            | 2                                    |
| 1XV9        | 2                     | I632, 4.3; L633, 1.1;                                       | i; i+1;                            | 2                                    |
| 1Y3A        | 3                     | W5, 4.2; F8, 3.3; L9, 1.8;                                  | i; i+3; i+4;                       | 5                                    |
| 1YCR        | 3                     | F19, 2.5; L22, 2.5; W23, 6.1;                               | i; i+3; i+4;                       | 5                                    |
| 1YOK        | 3                     | L745, 2.9; L748, 2.7; L749, 2.7;                            | i; i+3; i+4;                       | 5                                    |
| 1Z2C        | 2                     | R68, 4.0; L69, 1.1;                                         | i; i+1;                            | 2                                    |
| 1Z56        | 3                     | R209, 1.4; M211, 1.3; M212, 10.2;                           | i; i+2; i+3;                       | 3                                    |
| 1ZNV        | 2                     | D52, 1.3; Y55, 3.6;                                         | i; i+3;                            | 4                                    |
| 1ZOQ        | 2                     | Q2085, 2.2; I2089, 2.0;                                     | i; i+4;                            | 5                                    |
| 1ZOQ        | 2                     | L2096, 1.6; F2100, 2.4;                                     | i; i+4;                            | 5                                    |
| 1ZVV        | 2                     | I47, 2.4; M51, 2.0;                                         | i; i+4;                            | 5                                    |
| 2A19        | 2                     | F489, 5.3; E490, 1.4;                                       | i; i+1;                            | 2                                    |
| 2A45        | 2                     | E14, 1.6; L14, 2.5;                                         | i; 1;                              | 2                                    |
| 2A4J        | 2                     | 2, 4.2; 5, 2.0;                                             | i; i+3;                            | 4                                    |
| 2AGH        | 3                     | I849, 2.0; F852, 3.8; V853, 1.1;                            | i; i+3; i+4;                       | 5                                    |
| 2B5L        | 2                     | V24, 2.1; F27, 2.6;                                         | i; i+3;                            | 4                                    |
| 2C9W        | 3                     | L101, 2.2; L103, 1.0; L104, 3.1;                            | i; i+2; i+3;                       | 4                                    |
| 2CCL        | 2                     | K18, 1.9; R19, 3.7;                                         | i; i+1;                            | 2                                    |
| 2DWZ        | 3                     | R338, 2.1; R339, 1.4; R342, 3.7;                            | i; i+1; i+4;                       | 5                                    |
| 2EHB        | 3                     | F313, 5.6; M315, 1.3; I316, 2.0;                            | i; i+2; i+3;                       | 4                                    |
| 2EKV        | 3                     | W828, 6.2; W829, 1.1; L831, 1.3;                            | i; i+1; i+3;                       | 4                                    |
| 2EKV        | 2                     | K819, 2.5; L821, 3.4;                                       | i; i+3;                            | 3                                    |
| 2ERJ        | 2                     | H16, 2.9; L19, 1.0;                                         | i; i+3;                            | 4                                    |
| 2F93        | 2                     | I69, 2.1; I73, 2.2;                                         | i; i+4;                            | 5                                    |
| 2FM8        | 2                     | F54, 3.0; I58, 1.3;                                         | i; i+4;                            | 5                                    |
| 2FNJ        | 2                     | L241, 4.7; C245, 1.4;                                       | i; i+4;                            | 5                                    |
| 2FO1        | 2                     | L69, 3.1; H70, 1.2;                                         | i; i+1;                            | 2                                    |
| 2FOI        | 2                     | F368, 3.9; I369, 1.8;                                       | i; i+1;                            | 2                                    |
| 2G30        | 2                     | L11, 1.5; F8, 5.1;                                          | i; i+3;                            | 4                                    |

TABLE S2

Jochim, et al

| A. PDB CODE | N. HELIX LENGTH | O. HELIX START RESIDUE # | P. HELIX END RESIDUE # | Q. HELIX SEQUENCE            | R. RESOLUTION |
|-------------|-----------------|--------------------------|------------------------|------------------------------|---------------|
| 1MF8        | 10              | 349                      | 358                    | VFTWSLPFVG                   | 3.10          |
| 1MZN        | 9               | 1473                     | 1481                   | KILHRLQD                     | 1.90          |
| 1NIJ        | 9               | 45                       | 53                     | LARIKKIMK                    | 1.67          |
| 1NRL        | 9               | 688                      | 696                    | KILHRLQE                     | 2.00          |
| 1NU7        | 8               | 14                       | 14                     | ERELLESY                     | 2.20          |
| 1OL5        | 9               | 33                       | 41                     | SWFEKANL                     | 2.50          |
| 1OOK        | 7               | 14                       | 14                     | ERELLES                      | 2.30          |
| 1OR7        | 20              | 167                      | 186                    | VGTVRSRIFRAREAIDNKVQ         | 2.00          |
| 1OR7        | 11              | 19                       | 29                     | QKAFNLLVVRY                  | 2.00          |
| 1OSV        | 8               | 3                        | 10                     | ALLRYLLD                     | 2.50          |
| 1QLS        | 9               | 2                        | 10                     | MVSAFLKQA                    | 2.30          |
| 1R4A        | 15              | 2173                     | 2187                   | TEFEYLRKVLFEYMM              | 2.30          |
| 1R8Q        | 8               | 75                       | 82                     | RPLWRHYF                     | 1.86          |
| 1RP3        | 14              | 56                       | 69                     | LEKKVKELKEKIEK               | 2.30          |
| 1T0F        | 7               | 521                      | 527                    | LRYIYSQ                      | 1.85          |
| 1TTW        | 7               | 44                       | 50                     | RFAYAVL                      | 2.38          |
| 1TUE        | 23              | 4                        | 26                     | PKETLSERLSALQDKIIDHYEND      | 2.10          |
| 1TUE        | 14              | 460                      | 473                    | FITFLGALKSFLKG               | 2.10          |
| 1TY4        | 6               | 63                       | 68                     | DDFDAQ                       | 2.20          |
| 1U0S        | 15              | 192                      | 206                    | KSARIYLVFHKLEEL              | 1.90          |
| 1U0S        | 10              | 87                       | 96                     | QAMVIEAIKA                   | 1.90          |
| 1U7B        | 5               | 340                      | 344                    | LDFFF                        | 1.88          |
| 1U8T        | 7               | 8                        | 14                     | QAEIDAL                      | 1.50          |
| 1VCB        | 15              | 97                       | 111                    | PEIALELLMAANFLD              | 2.70          |
| 1X86        | 5               | 67                       | 71                     | DRLRP                        | 3.22          |
| 1XCG        | 7               | 69                       | 75                     | LRPLSYP                      | 2.50          |
| 1XIU        | 10              | 688                      | 697                    | KILHRLQEG                    | 2.50          |
| 1XL3        | 6               | 278                      | 283                    | FWQFFS                       | 2.20          |
| 1XLS        | 29              | 414                      | 442                    | RFAKLLRLPALRSIGLKCLEHLFFFKLI | 2.96          |
| 1XV9        | 7               | 631                      | 637                    | KILHRL                       | 2.70          |
| 1Y3A        | 6               | 5                        | 10                     | WYDFLM                       | 2.50          |
| 1YCR        | 6               | 19                       | 24                     | FSDLWK                       | 2.60          |
| 1YOK        | 9               | 743                      | 751                    | ALLRYLLDK                    | 2.50          |
| 1Z2C        | 5               | 67                       | 71                     | DRLRP                        | 3.00          |
| 1Z56        | 6               | 209                      | 214                    | RAMMVT                       | 3.92          |
| 1ZNV        | 6               | 51                       | 56                     | TDLIYY                       | 2.00          |
| 1ZOQ        | 13              | 2080                     | 2092                   | PQQQQVNLILKS                 | 2.37          |
| 1ZOQ        | 12              | 2094                     | 2105                   | PQLMAAFIKQRT                 | 2.37          |
| 1ZVV        | 8               | 47                       | 54                     | IMGLMSLA                     | 2.98          |
| 2A19        | 12              | 488                      | 499                    | AFETSKFFDRLR                 | 2.50          |
| 2A45        | 8               | 14                       | 14                     | ERELLESY                     | 3.65          |
| 2A4J        | 8               | 2                        | 9                      | WLLAKGL                      | NOT APP       |
| 2AGH        | 12              | 847                      | 858                    | SDIMDFVLKNTP                 | NOT APP       |
| 2B5L        | 11              | 23                       | 33                     | TVEYFTSQQVT                  | 2.85          |
| 2C9W        | 11              | 100                      | 110                    | ALELLMAANFL                  | 1.90          |
| 2CCL        | 12              | 11                       | 22                     | STDLTMLKRSVL                 | 2.03          |
| 2DWZ        | 14              | 338                      | 351                    | RRQKRLIFSTITSK               | 2.40          |
| 2EHB        | 6               | 312                      | 317                    | AFEMIT                       | 2.10          |
| 2EKV        | 5               | 828                      | 832                    | WWRLF                        | 3.40          |
| 2EKV        | 11              | 815                      | 825                    | RNVKRWLVLRN                  | 3.40          |
| 2ERJ        | 26              | 4                        | 29                     | SSSTKKTQLQLEHLLLDLQMILNGIN   | 3.00          |
| 2F93        | 27              | 53                       | 79                     | AAAVQEAASAILGLIILLGINLGLVA   | 2.00          |
| 2FM8        | 17              | 54                       | 70                     | FPALIKQASLDALFKCG            | 2.20          |
| 2FNJ        | 10              | 241                      | 250                    | LMDLCRRITR                   | 1.80          |
| 2FO1        | 17              | 68                       | 84                     | ELHRQRSELARANYEKA            | 3.12          |
| 2FO1        | 12              | 368                      | 379                    | FIDYAIYESEKY                 | 2.50          |
| 2G30        | 11              | 5                        | 15                     | DEAFSRLAQSR                  | 1.60          |



TABLE S2

| A. PDB<br>CODE | B. INTERFACE |          | D. TITLE                                                                                  |
|----------------|--------------|----------|-------------------------------------------------------------------------------------------|
|                | CHAINS       | C. CHAIN |                                                                                           |
| 2G4D           | A B          | A        | CRYSTAL STRUCTURE OF HUMAN SENP1 MUTANT (C603S) IN COMPLEX WITH SUMO-1                    |
| 2GPV           | A G          | G        | ESTROGEN RELATED RECEPTOR-GAMMA LIGAND BINDING DOMAIN COMPLEXED WITH 4-HYDROXY-TAM        |
| 2HRK           | A B          | B        | STRUCTURAL BASIS OF YEAST AMINOACYL-TRNA SYNTHETASE COMPLEX FORMATION REVEALED BY CR      |
| 2HUE           | A B          | B        | STRUCTURE OF THE H3-H4 CHAPERONE ASF1 BOUND TO HISTONES H3 AND H4                         |
| 2HUE           | B C          | C        | STRUCTURE OF THE H3-H4 CHAPERONE ASF1 BOUND TO HISTONES H3 AND H4                         |
| 2HWN           | A E          | E        | CRYSTAL STRUCTURE OF RII ALPHA DIMERIZATION/DOCKING DOMAIN OF PKA BOUND TO THE D-AKAP2 P  |
| 2I2R           | A E          | E        | CRYSTAL STRUCTURE OF THE KCHIP1/KV4.3 T1 COMPLEX                                          |
| 2I2R           | B F          | B        | CRYSTAL STRUCTURE OF THE KCHIP1/KV4.3 T1 COMPLEX                                          |
| 2I3S           | C D          | D        | BUB3 COMPLEX WITH BUB1 GLEBS MOTIF                                                        |
| 2I3T           | C D          | D        | BUB3 COMPLEX WITH MAD3 (BUBR1) GLEBS MOTIF                                                |
| 2IV8           | A P          | P        | BETA APPENDAGE IN COMPLEX WITH B-ARRESTIN PEPTIDE                                         |
| 2I59           | A M          | M        | CRYSTAL STRUCTURE OF THE ARF1:ARHGAP21-ARFBD COMPLEX                                      |
| 2JTT           | A C          | C        | SOLUTION STRUCTURE OF CALCIUM LOADED S100A6 BOUND TO C- TERMINAL SIAH-1 INTERACTING PRO1  |
| 2K8B           | A B          | B        | SOLUTION STRUCTURE OF PLAA FAMILY UBIQUITIN BINDING DOMAIN (PFUC) CIS ISOMER IN COMPLEX W |
| 2KA6           | A B          | B        | NMR STRUCTURE OF THE CBP-TAZ2/STAT1-TAD COMPLEX                                           |
| 2OCF           | A D          | D        | HUMAN ESTROGEN RECEPTOR ALPHA LIGAND-BINDING DOMAIN IN COMPLEX WITH ESTRADIOL AND THI     |
| 2OF5           | C J          | J        | OLIGOMERIC DEATH DOMAIN COMPLEX                                                           |
| 2OZN           | A B          | B        | THE COHESIN-DOCKERIN COMPLEX OF NAGJ AND NAGH FROM CLOSTRIDIUM PERFRINGENS                |
| 2P5T           | E F          | E        | MOLECULAR AND STRUCTURAL CHARACTERIZATION OF THE PEZAT CHROMOSOMAL TOXIN-ANTITOXIN S      |
| 2PHE           | A C          | C        | MODEL FOR VP16 BINDING TO PC4                                                             |
| 2PMS           | A C          | C        | CRYSTAL STRUCTURE OF THE COMPLEX OF HUMAN LACTOFERRIN N- LOBE AND LACTOFERRIN-BINDING     |
| 2POP           | C D          | C        | THE CRYSTAL STRUCTURE OF TAB1 AND BIR1 COMPLEX                                            |
| 2PQR           | B D          | D        | CRYSTAL STRUCTURE OF YEAST FIS1 COMPLEXED WITH A FRAGMENT OF YEAST CAF4                   |
| 2PV2           | A E          | E        | CRYSTALLOGRAPHIC STRUCTURE OF SURA FIRST PEPTIDYL-PROLYL ISOMERASE DOMAIN COMPLEXED W     |
| 2PV9           | A B          | A        | CRYSTAL STRUCTURE OF MURINE THROMBIN IN COMPLEX WITH THE EXTRACELLULAR FRAGMENT OF M      |
| 2QB0           | A D          | D        | STRUCTURE OF THE 2TEL CRYSTALLIZATION MODULE FUSED TO T4 LYSOZYME WITH AN ALA-GLY-PRO LI  |
| 2RHK           | A C          | C        | CRYSTAL STRUCTURE OF INFLUENZA A NS1A PROTEIN IN COMPLEX WITH F2F3 FRAGMENT OF HUMAN CE   |
| 2UZ6           | E O          | O        | ACHBP-TARGETED A-CONOTOXIN CORRELATES DISTINCT BINDING ORIENTATIONS WITH NACHR SUBTYPEI   |
| 2V1S           | E L          | L        | CRYSTAL STRUCTURE OF RAT TOM20-ALDH PRESEQUENCE COMPLEX                                   |
| 2V1Y           | A B          | B        | STRUCTURE OF A PHOSPHOINOSITIDE 3-KINASE ALPHA ADAPTOR- BINDING DOMAIN (ABD) IN A COMPLEX |
| 2V52           | B M          | M        | STRUCTURE OF MAL-RPEL2 COMPLEXED TO G-ACTIN                                               |
| 2VGO           | A D          | D        | CRYSTAL STRUCTURE OF AURORA B KINASE IN COMPLEX WITH REVERSINE INHIBITOR                  |
| 2VZD           | B D          | D        | CRYSTAL STRUCTURE OF THE C-TERMINAL CALPONIN HOMOLOGY DOMAIN OF ALPHA PARVIN IN COMPLI    |
| 2W2X           | B C          | B        | COMPLEX OF RAC2 AND PLCG2 SPPH DOMAIN                                                     |
| 2W2X           | B C          | C        | COMPLEX OF RAC2 AND PLCG2 SPPH DOMAIN                                                     |
| 2W84           | A B          | B        | STRUCTURE OF PEX14 IN COMPEX WITH PEX5                                                    |
| 2WAX           | A B          | B        | STRUCTURE OF THE HUMAN DDX6 C-TERMINAL DOMAIN IN COMPLEX WITH AN EDC3-FDF PEPTIDE         |
| 2Z2S           | G H          | H        | CRYSTAL STRUCTURE OF RHODOBACTER SPHAEROIDES SIGE IN COMPLEX WITH THE ANTI-SIGMA CHRR     |
| 2ZFD           | A B          | B        | THE CRYSTAL STRUCTURE OF PLANT SPECIFIC CALCIUM BINDING PROTEIN ATCBL2 IN COMPLEX WITH TH |
| 2ZNV           | A B          | A        | CRYSTAL STRUCTURE OF HUMAN AMSH-LP DUB DOMAIN IN COMPLEX WITH LYS63-LINKED UBIQUITIN DI   |
| 2ZSH           | A B          | B        | STRUCTURAL BASIS OF GIBBERELLIN(GA3)-INDUCED DELLA RECOGNITION BY THE GIBBERELLIN RECEPT  |
| 3A1G           | A B          | B        | HIGH-RESOLUTION CRYSTAL STRUCTURE OF RNA POLYMERASE PB1-PB2 SUBUNITS FROM INFLUENZA A V   |
| 3BLH           | A B          | B        | CRYSTAL STRUCTURE OF HUMAN CDK9/CYCLINT1                                                  |
| 3BS5           | A B          | A        | CRYSTAL STRUCTURE OF HCNK2-SAM/DHYP-SAM COMPLEX                                           |
| 3CJT           | A B          | A        | RIBOSOMAL PROTEIN L11 METHYLTRANSFERASE (PRMA) IN COMPLEX WITH DIMETHYLATED RIBOSOMAI     |
| 3CPH           | G A          | G        | CRYSTAL STRUCTURE OF SEC4 IN COMPLEX WITH RAB-GDI                                         |
| 3CQX           | B C          | C        | CHAPERONE COMPLEX                                                                         |
| 3D24           | A B          | B        | CRYSTAL STRUCTURE OF LIGAND-BINDING DOMAIN OF ESTROGEN- RELATED RECEPTOR ALPHA (ERRALP    |
| 3D48           | P R          | P        | CRYSTAL STRUCTURE OF A PROLACTIN RECEPTOR ANTAGONIST BOUND TO THE EXTRACELLULAR DOMA      |
| 3DA7           | A D          | D        | A CONFORMATIONALLY STRAINED, CIRCULAR PERMUTANT OF BARNASE                                |
| 3DAB           | A B          | B        | STRUCTURE OF THE HUMAN MDMX PROTEIN BOUND TO THE P53 TUMOR SUPPRESSOR TRANSACTIVATION     |
| 3DAB           | E F          | F        | STRUCTURE OF THE HUMAN MDMX PROTEIN BOUND TO THE P53 TUMOR SUPPRESSOR TRANSACTIVATION     |
| 3DAW           | A B          | B        | STRUCTURE OF THE ACTIN-DEPOLYMERIZING FACTOR HOMOLOGY DOMAIN IN COMPLEX WITH ACTIN        |
| 3DD7           | A B          | B        | STRUCTURE OF DOCH66Y IN COMPLEX WITH THE C-TERMINAL DOMAIN OF PHD                         |
| 3EBA           | A B          | B        | CABHUL6 FGLW MUTANT (HUMANIZED) IN COMPLEX WITH HUMAN LYSOZYME                            |
| 3ECH           | A C          | C        | THE MARR-FAMILY REPRESSOR MEXR IN COMPLEX WITH ITS ANTIREPRESSOR ARMR                     |
| 3EG5           | A B          | A        | CRYSTAL STRUCTURE OF MDIA1-TSH GBD-FH3 IN COMPLEX WITH CDC42-GMPPNP                       |

TABLE S2

Jochim, et al

| A. PDB<br>CODE | E. FUNCTION                              | F. $\Delta\Delta G_{AVG,HELIX}$<br>(KCAL/MOL) | G. $\Delta\Delta G_{SUM,HELIX}$<br>(KCAL/MOL) | H. $\Delta\Delta G_{SUM,CHAIN}$<br>(KCAL/MOL) | I. HELIX<br>CONTRIBUTION |
|----------------|------------------------------------------|-----------------------------------------------|-----------------------------------------------|-----------------------------------------------|--------------------------|
| 2G4D           | HYDROLASE/PROTEIN BINDING                | 3.6                                           | 10.8                                          | 17.9                                          | 60%                      |
| 2GPV           | TRANSCRIPTION                            | 2.1                                           | 4.2                                           | 4.2                                           | 100%                     |
| 2HRK           | LIGASE/RNA BINDING PROTEIN               | 2.7                                           | 5.3                                           | 8.9                                           | 60%                      |
| 2HUE           | DNA BINDING PROTEIN                      | 2.1                                           | 4.2                                           | 7.2                                           | 58%                      |
| 2HUE           | DNA BINDING PROTEIN                      | 2.3                                           | 4.5                                           | 22.5                                          | 20%                      |
| 2HWN           | TRANSFERASE                              | 2.1                                           | 4.1                                           | 4.1                                           | 100%                     |
| 2I2R           | TRANSPORT PROTEIN                        | 2.0                                           | 3.9                                           | 8.3                                           | 47%                      |
| 2I2R           | TRANSPORT PROTEIN                        | 3.4                                           | 6.7                                           | 19.2                                          | 35%                      |
| 2I3S           | CELL CYCLE                               | 2.8                                           | 8.4                                           | 15.4                                          | 55%                      |
| 2I3T           | CELL CYCLE                               | 2.8                                           | 5.5                                           | 17.7                                          | 31%                      |
| 2IV8           | ENDOCYTOSIS/REGULATOR                    | 2.7                                           | 5.4                                           | 9.1                                           | 59%                      |
| 2J59           | HYDROLASE                                | 2.1                                           | 4.2                                           | 4.2                                           | 100%                     |
| 2JTT           | CALCIUM BINDING PROTEIN/ANTITUMOR PROTEI | 2.5                                           | 5.0                                           | 5.0                                           | 100%                     |
| 2K8B           | PROTEIN BINDING                          | 2.1                                           | 6.4                                           | 6.4                                           | 100%                     |
| 2KA6           | TRANSCRIPTION REGULATOR                  | 2.6                                           | 10.5                                          | 19.6                                          | 54%                      |
| 2OCF           | HORMONE/GROWTH FACTOR                    | 2.2                                           | 4.4                                           | 4.4                                           | 100%                     |
| 2OF5           | APOPTOSIS                                | 3.5                                           | 7.0                                           | 7.0                                           | 100%                     |
| 2OZN           | TOXIN                                    | 2.3                                           | 4.5                                           | 7.0                                           | 64%                      |
| 2P5T           | TRANSCRIPTION REGULATOR                  | 2.1                                           | 4.2                                           | 17.9                                          | 23%                      |
| 2PHE           | TRANSCRIPTION                            | 2.5                                           | 7.6                                           | 7.6                                           | 100%                     |
| 2PMS           | METAL TRANSPORT, HYDROLASE               | 2.0                                           | 4.0                                           | 8.1                                           | 49%                      |
| 2POP           | SIGNALING PROTEIN/APOPTOSIS              | 2.3                                           | 7.0                                           | 7.0                                           | 100%                     |
| 2PQR           | APOPTOSIS                                | 2.9                                           | 5.7                                           | 22.6                                          | 25%                      |
| 2PV2           | ISOMERASE                                | 2.8                                           | 5.6                                           | 11.4                                          | 49%                      |
| 2PV9           | HYDROLASE                                | 2.2                                           | 4.4                                           | 8.5                                           | 52%                      |
| 2QB0           | HYDROLASE REGULATOR                      | 2.1                                           | 4.2                                           | 10.6                                          | 40%                      |
| 2RHK           | VIRAL PROTEIN/NUCLEAR PROTEIN            | 2.0                                           | 4.0                                           | 13.8                                          | 29%                      |
| 2UZ6           | RECEPTOR                                 | 4.2                                           | 8.4                                           | 10.6                                          | 79%                      |
| 2V1S           | OXIDOREDUCTASE                           | 2.8                                           | 5.5                                           | 5.5                                           | 100%                     |
| 2V1Y           | TRANSFERASE                              | 2.7                                           | 5.3                                           | 7.8                                           | 68%                      |
| 2V52           | STRUCTURAL PROTEIN/CONTRACTILE PROTEIN   | 2.0                                           | 6.0                                           | 13.8                                          | 43%                      |
| 2VGO           | TRANSFERASE                              | 2.0                                           | 3.9                                           | 20.1                                          | 19%                      |
| 2VZD           | CELL ADHESION                            | 2.6                                           | 5.1                                           | 7.6                                           | 67%                      |
| 2W2X           | SIGNALING PROTEIN/HYDROLASE              | 2.1                                           | 4.1                                           | 4.1                                           | 100%                     |
| 2W2X           | SIGNALING PROTEIN/HYDROLASE              | 2.9                                           | 5.8                                           | 5.8                                           | 100%                     |
| 2W84           | PROTEIN TRANSPORT                        | 4.1                                           | 8.1                                           | 8.1                                           | 100%                     |
| 2WAX           | HYDROLASE                                | 2.0                                           | 3.9                                           | 18.7                                          | 21%                      |
| 2Z2S           | TRANSCRIPTION                            | 2.0                                           | 3.9                                           | 9.5                                           | 41%                      |
| 2ZFD           | SIGNALING PROTEIN/TRANSFERASE            | 2.8                                           | 11.1                                          | 23.2                                          | 48%                      |
| 2ZNV           | HYDROLASE/SIGNALING PROTEIN              | 2.2                                           | 4.4                                           | 9.0                                           | 49%                      |
| 2ZSH           | HORMONE RECEPTOR                         | 2.4                                           | 4.8                                           | 12.3                                          | 39%                      |
| 3A1G           | TRANSFERASE                              | 2.1                                           | 6.4                                           | 9.1                                           | 70%                      |
| 3BLH           | TRANSCRIPTION                            | 2.7                                           | 5.3                                           | 11.8                                          | 45%                      |
| 3BS5           | SIGNALING PROTEIN/MEMBRANE PROTEIN       | 2.2                                           | 4.4                                           | 8.3                                           | 53%                      |
| 3CJT           | TRANSFERASE/RIBOSOMAL PROTEIN            | 4.0                                           | 8.0                                           | 24.6                                          | 33%                      |
| 3CPH           | PROTEIN TRANSPORT                        | 2.4                                           | 4.8                                           | 8.8                                           | 55%                      |
| 3CQX           | CHAPERONE                                | 2.2                                           | 4.4                                           | 7.4                                           | 59%                      |
| 3D24           | TRANSCRIPTION                            | 2.1                                           | 6.4                                           | 7.5                                           | 85%                      |
| 3D48           | HORMONE/HORMONE RECEPTOR                 | 2.4                                           | 7.2                                           | 16.3                                          | 44%                      |
| 3DA7           | PROTEIN BINDING                          | 3.6                                           | 7.1                                           | 14.6                                          | 49%                      |
| 3DAB           | CELL CYCLE                               | 3.5                                           | 7.0                                           | 8.9                                           | 79%                      |
| 3DAB           | CELL CYCLE                               | 3.5                                           | 6.9                                           | 8.2                                           | 84%                      |
| 3DAW           | STRUCTURAL PROTEIN/STRUCTURAL PROTEIN RE | 2.4                                           | 7.3                                           | 8.3                                           | 88%                      |
| 3DD7           | RIBOSOME INHIBITOR                       | 3.6                                           | 7.1                                           | 12.2                                          | 58%                      |
| 3EBA           | IMMUNE SYSTEM/HYDROLASE                  | 3.6                                           | 7.2                                           | 11.4                                          | 63%                      |
| 3ECH           | TRANSCRIPTION, TRANSCRIPTION REGULATION  | 5.7                                           | 11.3                                          | 12.4                                          | 91%                      |
| 3EG5           | SIGNALING PROTEIN                        | 2.6                                           | 7.8                                           | 17.2                                          | 45%                      |

TABLE S2

Jochim, et al

| A. PDB CODE | J. # HOTSPOT RESIDUES | K. HOTSPOT RESIDUES, RESIDUE #, $\Delta\Delta G$ (KCAL/MOL) | L. HOTSPOT RESIDUE HELIX POSITIONS | M. HOTSPOT RESIDUE END TO END LENGTH |
|-------------|-----------------------|-------------------------------------------------------------|------------------------------------|--------------------------------------|
| 2G4D        | 3                     | D468, 3.2; E469, 1.2; N472, 6.4;                            | i; i+1; i+4;                       | 5                                    |
| 2GPV        | 2                     | I1324, 2.0; L1328, 2.2;                                     | i; i+4;                            | 5                                    |
| 2HRK        | 2                     | R102, 2.2; Y106, 3.1;                                       | i; i+4;                            | 5                                    |
| 2HUE        | 2                     | L126, 2.5; I130, 1.7;                                       | i; i+4;                            | 5                                    |
| 2HUE        | 2                     | R36, 1.8; L37, 2.7;                                         | i; i+1;                            | 2                                    |
| 2HWN        | 2                     | V13, 2.8; M17, 1.3;                                         | i; i+4;                            | 5                                    |
| 2I2R        | 2                     | I77, 1.5; Y78, 2.4;                                         | i; i+1;                            | 2                                    |
| 2I2R        | 2                     | F11, 1.7; W8, 5.0;                                          | i; i+3;                            | 4                                    |
| 2I3S        | 3                     | E337, 3.5; E338, 1.9; L340, 3.0;                            | i; i+1; i+3;                       | 4                                    |
| 2I3T        | 2                     | E383, 2.3; L385, 3.2;                                       | i; i+2;                            | 3                                    |
| 2IV8        | 2                     | D3, 1.5; F6, 3.9;                                           | i; i+3;                            | 4                                    |
| 2I59        | 2                     | I1053, 2.0; I1057, 2.2;                                     | i; i+4;                            | 5                                    |
| 2JTT        | 2                     | I211, 1.8; W215, 3.2;                                       | i; i+4;                            | 5                                    |
| 2K8B        | 3                     | M105, 1.4; F106, 2.3; Q109, 2.7;                            | i; i+1; i+4;                       | 5                                    |
| 2KA6        | 4                     | E730, 1.8; F731, 4.5; E733, 3.0; V734, 1.2;                 | i; i+1; i+3; i+4;                  | 5                                    |
| 2OCF        | 2                     | L78, 2.3; L82, 2.1;                                         | i; i+4;                            | 5                                    |
| 2OF5        | 2                     | D864, 5.2; E867, 1.8;                                       | i; i+3;                            | 4                                    |
| 2OZN        | 2                     | I1588, 3.1; L1591, 1.4;                                     | i; i+3;                            | 4                                    |
| 2P5T        | 2                     | H123, 2.1; Y127, 2.1;                                       | i; i+4;                            | 5                                    |
| 2PHE        | 3                     | F475, 3.0; E476, 1.1; F479, 3.5;                            | i; i+1; i+4;                       | 5                                    |
| 2PMS        | 2                     | E182, 2.8; N183, 1.2;                                       | i; i+1;                            | 2                                    |
| 2POP        | 3                     | E2212, 2.4; D2213, 1.4; F2216, 3.2;                         | i; i+1; i+4;                       | 5                                    |
| 2PQR        | 2                     | F101, 3.8; R102, 1.9;                                       | i; i+1;                            | 2                                    |
| 2PV2        | 2                     | F6, 4.6; I9, 1.0;                                           | i; i+3;                            | 4                                    |
| 2PV9        | 2                     | E14(E), 2.5; L14(F), 1.9;                                   | i; i+1;                            | 2                                    |
| 2QB0        | 2                     | D79, 2.4; V80, 1.8;                                         | i; i+1;                            | 2                                    |
| 2RHK        | 2                     | Y97, 1.7; F98, 2.3;                                         | i; i+1;                            | 2                                    |
| 2UZ6        | 2                     | C8, 7.0; N11, 1.4;                                          | i; i+3;                            | 4                                    |
| 2V1S        | 2                     | R17, 2.0; Y21, 3.5;                                         | i; i+4;                            | 5                                    |
| 2V1Y        | 2                     | F494, 4.3; E496, 1.0;                                       | i; i+2;                            | 3                                    |
| 2V52        | 3                     | L118, 2.7; K119, 1.6; I122, 1.7;                            | i; i+1; i+4;                       | 5                                    |
| 2VGO        | 2                     | L833, 1.4; L836, 2.5;                                       | i; i+3;                            | 4                                    |
| 2VZD        | 2                     | L7, 3.1; L8, 2.0;                                           | i; i+1;                            | 2                                    |
| 2W2X        | 2                     | L67, 2.5; L70, 1.6;                                         | i; i+3;                            | 4                                    |
| 2W2X        | 2                     | F102, 3.5; V98, 2.3;                                        | i; i+4;                            | 5                                    |
| 2W84        | 2                     | W103, 4.9; F107, 3.2;                                       | i; i+4;                            | 5                                    |
| 2WAX        | 2                     | F206, 2.3; L210, 1.6;                                       | i; i+4;                            | 5                                    |
| 2Z2S        | 2                     | S65, 1.0; L66, 2.9;                                         | i; i+1;                            | 2                                    |
| 2ZFD        | 4                     | F313, 5.1; D314, 1.0; I315, 2.1; I316, 2.9;                 | i; i+1; i+2; i+3;                  | 4                                    |
| 2ZNV        | 2                     | E329, 1.4; F332, 3.0;                                       | i; i+3;                            | 4                                    |
| 2ZSH        | 2                     | L50, 2.1; E51, 2.7;                                         | i; i+1;                            | 2                                    |
| 3A1G        | 3                     | R3, 2.8; I4, 2.2; L7, 1.4;                                  | i; i+1; i+4;                       | 5                                    |
| 3BLH        | 2                     | F89, 2.2; K93, 3.1;                                         | i; i+4;                            | 5                                    |
| 3BS5        | 2                     | R57, 2.4; R61, 2.0;                                         | i; i+4;                            | 5                                    |
| 3CJT        | 2                     | W59, 4.5; W63, 3.5;                                         | i; i+4;                            | 5                                    |
| 3CPH        | 2                     | R248, 3.5; I252, 1.3;                                       | i; i+4;                            | 5                                    |
| 3CQX        | 2                     | Q156, 1.6; I160, 2.8;                                       | i; i+4;                            | 5                                    |
| 3D24        | 3                     | L210, 2.6; Y213, 2.1; L214, 1.7;                            | i; i+3; i+4;                       | 5                                    |
| 3D48        | 3                     | R177, 4.6; H180, 1.1; K181, 1.5;                            | i; i+3; i+4;                       | 5                                    |
| 3DA7        | 2                     | D36, 1.3; D40, 5.8;                                         | i; i+4;                            | 5                                    |
| 3DAB        | 2                     | F19, 2.8; W23, 4.2;                                         | i; i+4;                            | 5                                    |
| 3DAB        | 2                     | F19, 3.3; W23, 3.6;                                         | i; i+4;                            | 5                                    |
| 3DAW        | 3                     | R267, 1.2; R269, 4.7; M270, 1.4;                            | i; i+2; i+3;                       | 4                                    |
| 3DD7        | 2                     | F56, 2.8; F60, 4.3;                                         | i; i+4;                            | 5                                    |
| 3EBA        | 2                     | D91, 2.0; C95, 5.2;                                         | i; i+4;                            | 5                                    |
| 3ECH        | 2                     | W45, 7.0; Y48, 4.3;                                         | i; i+3;                            | 4                                    |
| 3EG5        | 3                     | R66, 4.7; L67, 1.3; L70, 1.8;                               | i; i+1; i+4;                       | 5                                    |

TABLE S2

Jochim, et al

| A. PDB CODE | N. HELIX LENGTH | O. HELIX START RESIDUE # | P. HELIX END RESIDUE # | Q. HELIX SEQUENCE                 | R. RESOLUTION |
|-------------|-----------------|--------------------------|------------------------|-----------------------------------|---------------|
| 2G4D        | 17              | 468                      | 484                    | DEIINFYMNMLMERSKE                 | 2.80          |
| 2GPV        | 10              | 1321                     | 1330                   | EAIIRKALMG                        | 2.85          |
| 2HRK        | 14              | 98                       | 111                    | RHILRWIDYMQNLL                    | 2.05          |
| 2HUE        | 11              | 121                      | 131                    | PKDIQLARRIR                       | 1.70          |
| 2HUE        | 11              | 31                       | 41                     | KPAIRRLARRG                       | 1.70          |
| 2HWN        | 17              | 4                        | 20                     | LAWKIAKMIVSDVMQQC                 | 1.60          |
| 2I2R        | 12              | 71                       | 82                     | EDTFKQIYAQFF                      | 3.35          |
| 2I2R        | 8               | 8                        | 15                     | WLPFARAA                          | 3.35          |
| 2I3S        | 9               | 336                      | 344                    | TEEILAMIK                         | 1.90          |
| 2I3T        | 9               | 381                      | 389                    | LEEVLAISR                         | 2.80          |
| 2IV8        | 12              | 2                        | 13                     | DDIVFEDFARQR                      | 2.80          |
| 2I59        | 22              | 1042                     | 1063                   | EEDTGVTNRDLISRRIKEYNNL            | 2.10          |
| 2JTT        | 14              | 205                      | 218                    | DDMKRTINKAWVES                    | NOT APP       |
| 2K8B        | 17              | 104                      | 120                    | PMFLDQVAKFIIDNTKG                 | NOT APP       |
| 2KA6        | 12              | 728                      | 739                    | PEEFDEVSRIVG                      | NOT APP       |
| 2OCF        | 7               | 78                       | 84                     | LRLMLAG                           | 2.95          |
| 2OF5        | 12              | 863                      | 874                    | QDVAEEVRVLE                       | 3.20          |
| 2OZN        | 10              | 1588                     | 1597                   | IGDLAMVSKN                        | 1.60          |
| 2P5T        | 19              | 110                      | 128                    | PWILMSDDLSDLIHTNIYL               | 3.20          |
| 2PHE        | 6               | 475                      | 480                    | FEQMFT                            | NOT APP       |
| 2PMS        | 19              | 174                      | 192                    | PQAKIAELENQVHRLEQEL               | 2.91          |
| 2POP        | 11              | 2212                     | 2222                   | EDELFRLSQLG                       | 3.10          |
| 2PQR        | 9               | 97                       | 105                    | SATTFRILA                         | 1.88          |
| 2PV2        | 8               | 3                        | 10                     | TLKFWDIF                          | 1.30          |
| 2PV9        | 6               | 14E                      | 14F                    | EKELLD                            | 3.50          |
| 2QB0        | 14              | 78                       | 91                     | GDVLYELLQHILKQ                    | 2.56          |
| 2RHK        | 6               | 97                       | 102                    | YFYSKF                            | 1.95          |
| 2UZ6        | 7               | 6                        | 12                     | PPCILNN                           | 2.40          |
| 2V1S        | 9               | 15                       | 23                     | LSRLLSYAG                         | 2.05          |
| 2V1Y        | 25              | 481                      | 505                    | RTAIEAFNETIKIFEEQCQTQERY          | 2.40          |
| 2V52        | 9               | 116                      | 124                    | DYLKRRKIRS                        | 1.45          |
| 2VGO        | 5               | 833                      | 837                    | LEELF                             | 1.70          |
| 2VZD        | 10              | 2                        | 11                     | DDL DALLADL                       | 2.10          |
| 2W2X        | 9               | 65                       | 73                     | DRLRPLSYP                         | 2.30          |
| 2W2X        | 16              | 98                       | 113                    | VEELFEWFQSIREITW                  | 2.30          |
| 2W84        | 17              | 94                       | 110                    | VADLALSENWAQEFLAA                 | NOT APP       |
| 2WAX        | 7               | 206                      | 212                    | FEGNLAL                           | 2.30          |
| 2Z2S        | 5               | 65                       | 69                     | SLASV                             | 2.70          |
| 2ZFD        | 7               | 312                      | 318                    | AFDIISG                           | 1.20          |
| 2ZNV        | 10              | 329                      | 338                    | EELFNVQDQH                        | 1.60          |
| 2ZSH        | 16              | 43                       | 58                     | MADVAQKLEQLEVMMS                  | 1.80          |
| 3A1G        | 8               | 3                        | 10                     | RIKELRNL                          | 1.70          |
| 3BLH        | 16              | 80                       | 95                     | GNSVAPAALFLAAKVE                  | 2.48          |
| 3BS5        | 7               | 56                       | 62                     | GRALLRI                           | 2.00          |
| 3CJT        | 8               | 59                       | 66                     | WLEAWRRD                          | 2.30          |
| 3CPH        | 15              | 239                      | 253                    | LGELPQGFARLSAIY                   | 2.90          |
| 3CQX        | 10              | 153                      | 162                    | QKFQSIIVGC                        | 2.30          |
| 3D24        | 8               | 208                      | 215                    | SELLKYLT                          | 2.11          |
| 3D48        | 34              | 161                      | 194                    | EESRLSAYYNLLHCLRRDSHKIDNYLKLKCRII | 2.50          |
| 3DA7        | 9               | 35                       | 43                     | LDALWDCLT                         | 2.25          |
| 3DAB        | 8               | 19                       | 26                     | FSDLWKLL                          | 1.90          |
| 3DAB        | 8               | 19                       | 26                     | FSDLWKLL                          | 1.90          |
| 3DAW        | 10              | 266                      | 275                    | IRERMLYSSC                        | 2.55          |
| 3DD7        | 9               | 55                       | 63                     | EFASLFDTL                         | 1.70          |
| 3EBA        | 11              | 90                       | 100                    | ADAVACAKRVV                       | 1.85          |
| 3ECH        | 7               | 44                       | 50                     | AWDLYGE                           | 1.80          |
| 3EG5        | 9               | 65                       | 73                     | DRLRPLSYP                         | 2.70          |

| A. PDB<br>CODE | B. INTERFACE<br>CHAINS | C. CHAIN | D. TITLE                                                                                  |
|----------------|------------------------|----------|-------------------------------------------------------------------------------------------|
| 3EJB           | G H                    | G        | CRYSTAL STRUCTURE OF P450BIOI IN COMPLEX WITH TETRADECANOIC ACID LIGATED ACYL CARRIER PR  |
| 3EZQ           | C D                    | C        | CRYSTAL STRUCTURE OF THE FAS/FADD DEATH DOMAIN COMPLEX                                    |
| 3F75           | A P                    | P        | ACTIVATED TOXOPLASMA GONDII CATHEPSIN L (TGCP L) IN COMPLEX WITH ITS PROPEPTIDE           |
| 3F9K           | B C                    | B        | TWO DOMAIN FRAGMENT OF HIV-2 INTEGRASE IN COMPLEX WITH LEDGF IBD                          |
| 3FMP           | A B                    | B        | CRYSTAL STRUCTURE OF THE NUCLEOPORIN NUP214 IN COMPLEX WITH THE DEAD-BOX HELICASE DDX19   |
| 3FUB           | C D                    | C        | CRYSTAL STRUCTURE OF GDNF-GFRALPHA1 COMPLEX                                               |
| 3G9V           | A B                    | A        | CRYSTAL STRUCTURE OF A SOLUBLE DECOY RECEPTOR IL-22BP BOUND TO INTERLEUKIN-22             |
| 3GCG           | A B                    | B        | CRYSTAL STRUCTURE OF MAP AND CDC42 COMPLEX                                                |
| 3H2U           | A B                    | A        | HUMAN RAVR1 RRM1, RRM2, AND RRM3 DOMAINS IN COMPLEX WITH HUMAN VINCULIN TAIL DOMAIN V     |
| 3H9R           | A B                    | A        | CRYSTAL STRUCTURE OF THE KINASE DOMAIN OF TYPE I ACTIVIN RECEPTOR (ACVR1) IN COMPLEX WITH |

**TABLE S2**

Jochim, et al

| A. PDB<br>CODE | E. FUNCTION                     | F. $\Delta\Delta G_{\text{AVG,HELIX}}$<br>(KCAL/MOL) | G. $\Delta\Delta G_{\text{SUM,HELIX}}$<br>(KCAL/MOL) | H. $\Delta\Delta G_{\text{SUM,CHAIN}}$<br>(KCAL/MOL) | I. HELIX<br>CONTRIBUTION |
|----------------|---------------------------------|------------------------------------------------------|------------------------------------------------------|------------------------------------------------------|--------------------------|
| 3EJB           | OXIDOREDUCTASE/LIPID TRANSPORT  | 2.3                                                  | 9.3                                                  | 13.5                                                 | 69%                      |
| 3EZQ           | APOPTOSIS                       | 2.0                                                  | 4.0                                                  | 7.0                                                  | 57%                      |
| 3F75           | HYDROLASE                       | 2.6                                                  | 5.1                                                  | 19.6                                                 | 26%                      |
| 3F9K           | VIRAL PROTEIN, RECOMBINATION    | 2.0                                                  | 3.9                                                  | 5.4                                                  | 72%                      |
| 3FMP           | ONCOPROTEIN/HYDROLASE           | 2.1                                                  | 6.2                                                  | 8.7                                                  | 71%                      |
| 3FUB           | HORMONE                         | 2.1                                                  | 4.2                                                  | 5.3                                                  | 79%                      |
| 3G9V           | CYTOKINE/CYTOKINE RECEPTOR      | 2.7                                                  | 5.4                                                  | 12.8                                                 | 42%                      |
| 3GCG           | SIGNALING PROTEIN/TRANSCRIPTION | 2.2                                                  | 4.4                                                  | 13.7                                                 | 32%                      |
| 3H2U           | CELL ADHESION                   | 2.6                                                  | 5.1                                                  | 7.2                                                  | 71%                      |
| 3H9R           | ISOMERASE/PROTEIN KINASE        | 2.0                                                  | 3.9                                                  | 6.6                                                  | 59%                      |

TABLE S2

Jochim, et al

| A. PDB<br>CODE | J. # HOTSPOT<br>RESIDUES | K. HOTSPOT RESIDUES, RESIDUE #, $\Delta\Delta G$ (KCAL/MOL) | L. HOTSPOT RESIDUE HELIX POSITIONS | M. HOTSPOT RESIDUE<br>END TO END LENGTH |
|----------------|--------------------------|-------------------------------------------------------------|------------------------------------|-----------------------------------------|
| 3EJB           | 4                        | L57, 3.4; D58, 1.9; V60, 1.3; E61, 2.7;                     | i; i+1; i+3; i+4;                  | 5                                       |
| 3EZQ           | 2                        | Y291, 1.9; I295, 2.1;                                       | i; i+4;                            | 5                                       |
| 3F75           | 2                        | R170, 2.6; F173, 2.5;                                       | i; i+3;                            | 4                                       |
| 3F9K           | 2                        | M128, 1.3; W131, 2.6;                                       | i; i+3;                            | 4                                       |
| 3FMP           | 3                        | D255, 1.7; Q256, 1.2; R259, 3.3;                            | i; i+1; i+4;                       | 5                                       |
| 3FUB           | 2                        | R171, 2.5; I175, 1.7;                                       | i; i+4;                            | 5                                       |
| 3G9V           | 2                        | W123, 1.3; E125, 4.1;                                       | i; i+2;                            | 3                                       |
| 3GCG           | 2                        | I156, 1.3; F159, 3.1;                                       | i; i+3;                            | 4                                       |
| 3H2U           | 2                        | L928, 1.2; E932, 3.9;                                       | i; i+4;                            | 5                                       |
| 3H9R           | 2                        | W245, 2.1; F246, 1.8;                                       | i; i+1;                            | 2                                       |

**TABLE S2**

Jochim, et al

| A. PDB<br>CODE | N. HELIX<br>LENGTH | O. HELIX START<br>RESIDUE # | P. HELIX END<br>RESIDUE # | Q. HELIX SEQUENCE                 | R. RESOLUTION |
|----------------|--------------------|-----------------------------|---------------------------|-----------------------------------|---------------|
| 3EJB           | 14                 | 57                          | 70                        | LDTVELVMALEEEF                    | 2.00          |
| 3EZQ           | 33                 | 287                         | 319                       | KKEAYDTLIKDLKKANLCTLAEKIQTIILKDIT | 2.73          |
| 3F75           | 8                  | 170                         | 177                       | RDEFRRKY                          | 1.99          |
| 3F9K           | 11                 | 124                         | 134                       | QEVKMVAWWIG                       | 3.20          |
| 3FMP           | 11                 | 253                         | 263                       | HQDQSIRIORM                       | 3.19          |
| 3FUB           | 15                 | 165                         | 179                       | DTCKKYRSAYITPCT                   | 2.35          |
| 3G9V           | 5                  | 122                         | 126                       | PWWET                             | 2.76          |
| 3GCG           | 24                 | 155                         | 178                       | PITRFNTQTKMIEQVSQEIFERNF          | 2.30          |
| 3H2U           | 21                 | 918                         | 938                       | DIIAAAKRMALLMAEMSRLVR             | 2.75          |
| 3H9R           | 14                 | 242                         | 255                       | EKSWFRETELYNTV                    | 2.35          |



**Table S3.** Dataset of HIPP interactions with Extended Interfaces

## Description of Entries:

- A. PDB code of predicted target.
- B. Chains in the complex featuring a helix at the interface.
- C. Candidate helix to be mimicked is part of the indicated chain.
- D. Title of PDB entry.
- E. Function of protein complex.
- F.  $\Delta\Delta G_{\text{avg}}/\text{helix}$  is derived from Rosetta computational alanine mutagenesis studies and indicates the average free energy penalty for mutating two or more key residues in the helix at the interface to alanine.
- G.  $\Delta\Delta G_{\text{sum}}/\text{helix}$  is derived from Rosetta computational alanine mutagenesis studies and indicates the average free energy penalty for mutating two or more key residues at the interface to alanine.
- H.  $\Delta\Delta G_{\text{sum}}/\text{chain}$  is derived from Rosetta computational alanine mutagenesis studies and indicates the sum free energy penalty for mutating two or more key residues in the helix at the interface to alanine.
- I. Helix contribution refers to the proportion of key contact residues positioned on the candidate helix as compared to the chain (see text for a detailed explanation).
- J. Number of hot spot residues in helix.
- K. Relative positioning of the hot spot residues on a helix.
- L. Hot spot residues derived from Rosetta computational alanine scanning mutagenesis.
- M. Number of residues separating end hot spot residues (see Methods for more details).
- N. Length of candidate helix to be mimicked.
- O. First residue of the candidate helix segment.
- P. Last residue of the candidate helix segment.
- Q. Sequence of candidate helix to be mimicked.
- R. Resolution of PDB structure (NOT APP indicates NMR structure).

TABLE S3

| A. PDB CODE | B. INTERFACE CHAINS | C. CHAIN | D. TITLE                                                                                  |
|-------------|---------------------|----------|-------------------------------------------------------------------------------------------|
| 1A93        | A B                 | B        | NMR SOLUTION STRUCTURE OF THE C-MYC-MAX HETERODIMERIC LEUCINE ZIPPER, NMR, MINIMIZED      |
| 1AVO        | C D                 | D        | PROTEASOME ACTIVATOR REG(ALPHA)                                                           |
| 1AVO        | E F                 | E        | PROTEASOME ACTIVATOR REG(ALPHA)                                                           |
| 1BCC        | D H                 | H        | CYTOCHROME BC1 COMPLEX FROM CHICKEN                                                       |
| 1BH8        | A B                 | B        | HTAFII18/HTAFII28 HETERODIMER CRYSTAL STRUCTURE                                           |
| 1BIQ        | A B                 | A        | RIBONUCLEOSIDE-DIPHOSPHATE REDUCTASE 1 BETA CHAIN MUTANT E238A                            |
| 1BIQ        | A B                 | B        | RIBONUCLEOSIDE-DIPHOSPHATE REDUCTASE 1 BETA CHAIN MUTANT E238A                            |
| 1BP3        | A B                 | A        | THE XRAY STRUCTURE OF A GROWTH HORMONE-PROLACTIN RECEPTOR COMPLEX                         |
| 1BPL        | A B                 | B        | GLYCOSYLTRANSFERASE                                                                       |
| 1CDL        | A E                 | E        | TARGET ENZYME RECOGNITION BY CALMODULIN: 2.4 ANGSTROMS STRUCTURE OF A CALMODULIN-PEF      |
| 1CKK        | A B                 | B        | CALMODULIN/RAT CA2+/CALMODULIN DEPENDENT PROTEIN KINASE FRAGMENT                          |
| 1CP9        | A B                 | A        | CRYSTAL STRUCTURE OF PENICILLIN G ACYLASE FROM THE BRO1 MUTANT STRAIN OF PROVIDENCIA R    |
| 1CUL        | A B                 | A        | COMPLEX OF GS-ALPHA WITH THE CATALYTIC DOMAINS OF MAMMALIAN ADENYL CYCLASE: COMPI         |
| 1D8D        | A B                 | A        | CO-CRYSTAL STRUCTURE OF RAT PROTEIN FARNESYLTRANSFERASE COMPLEXED WITH A K-RAS4B PEP1     |
| 1DE4        | G I                 | G        | HEMOCHROMATOSIS PROTEIN HFE COMPLEXED WITH TRANSFERRIN RECEPTOR                           |
| 1DKF        | A B                 | A        | CRYSTAL STRUCTURE OF A HETERODIMERIC COMPLEX OF RAR AND RXR LIGAND-BINDING DOMAINS        |
| 1DML        | A B                 | B        | CRYSTAL STRUCTURE OF HERPES SIMPLEX UL42 BOUND TO THE C- TERMINUS OF HSV POL              |
| 1DP5        | A B                 | B        | THE STRUCTURE OF PROTEINASE A COMPLEXED WITH A IA3 MUTANT INHIBITOR                       |
| 1DX5        | A M                 | A        | CRYSTAL STRUCTURE OF THE THROMBIN-THROMBOMODULIN COMPLEX                                  |
| 1E0F        | A D                 | A        | CRYSTAL STRUCTURE OF THE HUMAN ALPHA-THROMBIN-HAEMADIN COMPLEX: AN EXOSITE II-BINDIN      |
| 1E3A        | A B                 | A        | A SLOW PROCESSING PRECURSOR PENICILLIN ACYLASE FROM ESCHERICHIA COLI                      |
| 1E3A        | A B                 | A        | A SLOW PROCESSING PRECURSOR PENICILLIN ACYLASE FROM ESCHERICHIA COLI                      |
| 1E7P        | E F                 | E        | QUINOL:FUMARATE REDUCTASE FROM WOLINELLA SUCCINOGENES                                     |
| 1EER        | A C                 | A        | CRYSTAL STRUCTURE OF HUMAN ERYTHROPOIETIN COMPLEXED TO ITS RECEPTOR AT 1.9 ANGSTROMS      |
| 1EFU        | C D                 | D        | ELONGATION FACTOR COMPLEX EF-TU/EF-TS FROM ESCHERICHIA COLI                               |
| 1F51        | D H                 | D        | A TRANSIENT INTERACTION BETWEEN TWO PHOSPHORELAY PROTEINS TRAPPED IN A CRYSTAL LATTICI    |
| 1F6F        | A B                 | A        | CRYSTAL STRUCTURE OF THE TERNARY COMPLEX BETWEEN OVINE PLACENTAL LACTOGEN AND THE E       |
| 1F80        | A E                 | A        | HOLO-(ACYL CARRIER PROTEIN) SYNTHASE IN COMPLEX WITH HOLO- (ACYL CARRIER PROTEIN)         |
| 1FM6        | A D                 | A        | THE 2.1 ANGSTROM RESOLUTION CRYSTAL STRUCTURE OF THE HETERODIMER OF THE HUMAN RXRALF      |
| 1FM6        | U V                 | V        | THE 2.1 ANGSTROM RESOLUTION CRYSTAL STRUCTURE OF THE HETERODIMER OF THE HUMAN RXRALF      |
| 1FQJ        | A B                 | A        | CRYSTAL STRUCTURE OF THE HETEROTRIMERIC COMPLEX OF THE RGS DOMAIN OF RGS9, THE GAMMA      |
| 1G5J        | A B                 | B        | COMPLEX OF BCL-XL WITH PEPTIDE FROM BAD                                                   |
| 1G73        | A C                 | A        | CRYSTAL STRUCTURE OF SMAC BOUND TO XIAP-BIR3 DOMAIN                                       |
| 1GX7        | A D                 | A        | BEST MODEL OF THE ELECTRON TRANSFER COMPLEX BETWEEN CYTOCHROME C3 AND [FE]-HYDROGE        |
| 1GX7        | A D                 | D        | BEST MODEL OF THE ELECTRON TRANSFER COMPLEX BETWEEN CYTOCHROME C3 AND [FE]-HYDROGE        |
| 1GZL        | A C                 | A        | CRYSTAL STRUCTURE OF C14LINKMID/IQN17: A CROSS-LINKED INHIBITOR OF HIV-1 ENTRY BOUND TO T |
| 1H2S        | A B                 | A        | MOLECULAR BASIS OF TRANSMENBRANE SIGNALLING BY SENSORY RHODOPSIN II-TRANSDUCER COMF       |
| 1H30        | A B                 | B        | CRYSTAL STRUCTURE OF THE HUMAN TAF4-TAF12 (TAFII135-TAFII20) COMPLEX                      |
| 1H4L        | B E                 | E        | STRUCTURE AND REGULATION OF THE CDK5-P25(NCK5A) COMPLEX                                   |
| 1H1A        | A B                 | B        | KALLIKREIN COMPLEXED WITH HIRUSTASIN                                                      |
| 1HL6        | A B                 | B        | A NOVEL MODE OF RBD-PROTEIN RECOGNITION IN THE Y14-MAGO COMPLEX                           |
| 1HX1        | A B                 | B        | CRYSTAL STRUCTURE OF A BAG DOMAIN IN COMPLEX WITH THE HSC70 ATPASE DOMAIN                 |
| 1I1R        | A B                 | B        | CRYSTAL STRUCTURE OF A CYTOKINE/RECEPTOR COMPLEX                                          |
| 1I2M        | C D                 | C        | RAN-RCC1-SO4 COMPLEX                                                                      |
| 1I5K        | A C                 | C        | STRUCTURE AND BINDING DETERMINANTS OF THE RECOMBINANT KRINGLE-2 DOMAIN OF HUMAN PLA       |
| 1IBR        | A B                 | B        | COMPLEX OF RAN WITH IMPORTIN BETA                                                         |
| 1ID5        | L H                 | L        | CRYSTAL STRUCTURE OF BOVINE THROMBIN COMPLEX WITH PROTEASE INHIBITOR ECOTIN               |
| 1IHF        | A B                 | A        | INTEGRATION HOST FACTOR/DNA COMPLEX                                                       |
| 1IHF        | A B                 | B        | INTEGRATION HOST FACTOR/DNA COMPLEX                                                       |
| 1J7D        | A B                 | A        | CRYSTAL STRUCTURE OF HMMS2-HUBC13                                                         |
| 1JEK        | A B                 | B        | VISNA TM CORE STRUCTURE                                                                   |
| 1JFI        | A B                 | B        | CRYSTAL STRUCTURE OF THE NC2-TBP-DNA TERNARY COMPLEX                                      |
| 1JFI        | B C                 | B        | CRYSTAL STRUCTURE OF THE NC2-TBP-DNA TERNARY COMPLEX                                      |
| 1JM7        | A B                 | A        | SOLUTION STRUCTURE OF THE BRCA1/BARD1 RING-DOMAIN HETERODIMER                             |
| 1JYO        | A F                 | A        | STRUCTURE OF THE SALMONELLA VIRULENCE EFFECTOR SPTP IN COMPLEX WITH ITS SECRETION CHAI    |
| 1JYO        | C F                 | F        | STRUCTURE OF THE SALMONELLA VIRULENCE EFFECTOR SPTP IN COMPLEX WITH ITS SECRETION CHAI    |
| 1LDK        | A D                 | A        | STRUCTURE OF THE CUL1-RBX1-SKP1-F BOXSKP2 SCF UBIQUITIN LIGASE COMPLEX                    |

TABLE S3

Jochim, et al

| A. PDB<br>CODE | E. FUNCTION                             | F. $\Delta\Delta G_{\text{AVG,HELIX}}$<br>(KCAL/MOL) | G. $\Delta\Delta G_{\text{SUM,HELIX}}$<br>(KCAL/MOL) | H. $\Delta\Delta G_{\text{SUM,CHAIN}}$<br>(KCAL/MOL) | I. HELIX<br>CONTRIBUTION |
|----------------|-----------------------------------------|------------------------------------------------------|------------------------------------------------------|------------------------------------------------------|--------------------------|
| 1A93           | LEUCINE ZIPPER                          | 2.0                                                  | 7.9                                                  | 7.9                                                  | 100%                     |
| 1AVO           | PROTEASOME ACTIVATOR                    | 2.0                                                  | 7.8                                                  | 18.5                                                 | 42%                      |
| 1AVO           | PROTEASOME ACTIVATOR                    | 2.8                                                  | 19.9                                                 | 19.9                                                 | 100%                     |
| 1BCC           | OXIDOREDUCTASE                          | 5.5                                                  | 11.0                                                 | 15.5                                                 | 71%                      |
| 1BH8           | TRANSCRIPTION REGULATION COMPLEX        | 2.0                                                  | 9.8                                                  | 16.0                                                 | 61%                      |
| 1BIQ           | OXIDOREDUCTASE                          | 2.4                                                  | 7.2                                                  | 37.3                                                 | 19%                      |
| 1BIQ           | OXIDOREDUCTASE                          | 2.2                                                  | 6.7                                                  | 33.2                                                 | 20%                      |
| 1BP3           | HORMONE/GROWTH FACTOR                   | 2.0                                                  | 3.9                                                  | 14.4                                                 | 27%                      |
| 1BPL           | GLYCOSYLTRANSFERASE                     | 2.9                                                  | 17.1                                                 | 48.5                                                 | 35%                      |
| 1CDL           | CALCIUM-BINDING PROTEIN                 | 2.4                                                  | 21.8                                                 | 23.3                                                 | 94%                      |
| 1CKK           | CALMODULIN-PEPTIDE COMPLEX              | 2.6                                                  | 5.1                                                  | 11.6                                                 | 44%                      |
| 1CP9           | HYDROLASE                               | 2.9                                                  | 11.5                                                 | 68.9                                                 | 17%                      |
| 1CUL           | LYASE/LYASE/SIGNALING PROTEIN           | 2.3                                                  | 4.5                                                  | 9.3                                                  | 48%                      |
| 1D8D           | TRANSFERASE                             | 2.1                                                  | 10.7                                                 | 49.1                                                 | 22%                      |
| 1DE4           | METAL TRANSPORT INHIBITOR/RECEPTOR      | 2.7                                                  | 10.6                                                 | 14.5                                                 | 73%                      |
| 1DKF           | HORMONE/GROWTH FACTOR RECEPTOR          | 2.6                                                  | 5.2                                                  | 8.1                                                  | 64%                      |
| 1DML           | DNA BINDING PROTEIN/TRANSFERASE         | 3.1                                                  | 9.2                                                  | 12.1                                                 | 76%                      |
| 1DP5           | HYDROLASE/HYDROLASE INHIBITOR           | 2.0                                                  | 16.0                                                 | 22.0                                                 | 73%                      |
| 1DX5           | SERINE PROTEINASE                       | 2.2                                                  | 8.7                                                  | 10.7                                                 | 81%                      |
| 1E0F           | COAGULATION/CRYSTAL STRUCTURE/HEPARIN-B | 2.0                                                  | 3.9                                                  | 6.1                                                  | 64%                      |
| 1E3A           | ANTIBIOTIC RESISTANCE                   | 2.4                                                  | 11.9                                                 | 110.8                                                | 11%                      |
| 1E3A           | ANTIBIOTIC RESISTANCE                   | 2.8                                                  | 19.7                                                 | 110.8                                                | 18%                      |
| 1E7P           | OXIDOREDUCTASE                          | 2.5                                                  | 5.0                                                  | 14.7                                                 | 34%                      |
| 1EER           | COMPLEX (CYTOKINE/RECEPTOR)             | 2.1                                                  | 4.1                                                  | 4.1                                                  | 100%                     |
| 1EFU           | COMPLEX (TWO ELONGATION FACTORS)        | 2.9                                                  | 8.8                                                  | 19.5                                                 | 45%                      |
| 1F51           | TRANSFERASE                             | 2.2                                                  | 8.9                                                  | 8.9                                                  | 100%                     |
| 1F6F           | HORMONE/GROWTH FACTOR/HORMONE RECEPTOR  | 2.3                                                  | 9.0                                                  | 10.7                                                 | 84%                      |
| 1F80           | TRANSFERASE                             | 2.3                                                  | 9.2                                                  | 12.3                                                 | 75%                      |
| 1FM6           | TRANSCRIPTION                           | 2.0                                                  | 6.1                                                  | 7.6                                                  | 80%                      |
| 1FM6           | TRANSCRIPTION                           | 2.1                                                  | 6.4                                                  | 6.4                                                  | 100%                     |
| 1FQJ           | SIGNALING PROTEIN                       | 2.0                                                  | 5.9                                                  | 5.9                                                  | 100%                     |
| 1G5J           | APOPTOSIS                               | 2.3                                                  | 4.6                                                  | 4.6                                                  | 100%                     |
| 1G73           | APOPTOSIS/APOPTOSIS INHIBITOR           | 3.3                                                  | 13.2                                                 | 13.2                                                 | 100%                     |
| 1GX7           | OXIDOREDUCTASE                          | 2.8                                                  | 8.5                                                  | 40.2                                                 | 21%                      |
| 1GX7           | OXIDOREDUCTASE                          | 2.2                                                  | 13.3                                                 | 51.0                                                 | 26%                      |
| 1GZL           | GLYCOPROTEIN                            | 2.6                                                  | 5.1                                                  | 5.1                                                  | 100%                     |
| 1H2S           | MEMBRANE PROTEIN                        | 2.0                                                  | 4.0                                                  | 9.0                                                  | 44%                      |
| 1H30           | TRANSCRIPTION/TBP-ASSOCIATED FACTORS    | 2.0                                                  | 5.9                                                  | 14.3                                                 | 41%                      |
| 1H4L           | KINASE/KINASE ACTIVATOR                 | 2.3                                                  | 6.9                                                  | 9.1                                                  | 76%                      |
| 1H1A           | COMPLEX (PROTEASE/INHIBITOR)            | 2.9                                                  | 5.8                                                  | 27.9                                                 | 21%                      |
| 1HL6           | SIGNAL PROTEIN                          | 3.0                                                  | 11.9                                                 | 26.6                                                 | 45%                      |
| 1HX1           | CHAPERONE/CHAPERONE INHIBITOR           | 2.5                                                  | 4.9                                                  | 11.1                                                 | 44%                      |
| 1I1R           | CYTOKINE                                | 2.3                                                  | 7.0                                                  | 8.2                                                  | 85%                      |
| 1I2M           | CELL CYCLE                              | 2.1                                                  | 8.2                                                  | 13.3                                                 | 62%                      |
| 1I5K           | BLOOD CLOTTING                          | 2.7                                                  | 8.0                                                  | 8.0                                                  | 100%                     |
| 1IBR           | CELL CYCLE,TRANSLATION                  | 2.1                                                  | 4.1                                                  | 20.4                                                 | 20%                      |
| 1ID5           | HYDROLASE                               | 2.7                                                  | 13.5                                                 | 13.5                                                 | 100%                     |
| 1IHF           | TRANSCRIPTION/DNA                       | 2.0                                                  | 18.3                                                 | 38.1                                                 | 48%                      |
| 1IHF           | TRANSCRIPTION/DNA                       | 2.4                                                  | 11.9                                                 | 32.3                                                 | 37%                      |
| 1J7D           | UNKNOWN FUNCTION                        | 2.2                                                  | 6.6                                                  | 6.6                                                  | 100%                     |
| 1JEK           | VIRAL PROTEIN                           | 2.2                                                  | 8.6                                                  | 12.5                                                 | 69%                      |
| 1JF1           | TRANSCRIPTION/DNA                       | 2.3                                                  | 9.0                                                  | 16.5                                                 | 55%                      |
| 1JF1           | TRANSCRIPTION/DNA                       | 2.7                                                  | 8.1                                                  | 8.1                                                  | 100%                     |
| 1JM7           | ANTITUMOR                               | 3.0                                                  | 12.0                                                 | 15.8                                                 | 76%                      |
| 1JYO           | CHAPERONE                               | 2.5                                                  | 5.0                                                  | 6.5                                                  | 77%                      |
| 1JYO           | CHAPERONE                               | 2.3                                                  | 9.3                                                  | 26.1                                                 | 36%                      |
| 1LDK           | LIGASE                                  | 2.3                                                  | 6.9                                                  | 6.9                                                  | 100%                     |

TABLE S3

| A. PDB CODE | J. # HOTSPOT RESIDUES | K. HOTSPOT RESIDUES, RESIDUE #, $\Delta\Delta G$ (KCAL/MOL)                                        |
|-------------|-----------------------|----------------------------------------------------------------------------------------------------|
| 1A93        | 4                     | N10, 2.3; H13, 1.9; I17, 1.7; L20, 2.0;                                                            |
| 1AVO        | 4                     | H202, 1.4; Y209, 2.7; V216, 1.3; R220, 2.4;                                                        |
| 1AVO        | 7                     | L29, 1.3; Y32, 4.0; F33, 2.7; K36, 6.9; I37, 1.6; L40, 1.2; L44, 2.2;                              |
| 1BCC        | 2                     | F59, 3.8; F74, 7.2;                                                                                |
| 1BH8        | 5                     | M154, 1.1; K159, 1.0; F161, 4.5; V162, 1.7; V166, 1.5;                                             |
| 1BIQ        | 3                     | D158, 3.2; Y166, 1.4; L169, 2.6;                                                                   |
| 1BIQ        | 3                     | L82, 1.3; I86, 1.0; R89, 4.4;                                                                      |
| 1BP3        | 2                     | H18, 1.0; F25, 2.9;                                                                                |
| 1BPL        | 6                     | E211, 1.0; I212, 1.3; W215, 3.5; W218, 5.1; Y219, 4.4; E222, 1.8;                                  |
| 1CDL        | 9                     | R798, 2.1; K799, 2.2; W800, 7.1; H805, 2.3; V807, 2.1; R808, 2.1; I810, 1.2; R812, 1.3; L813, 1.4; |
| 1CKK        | 2                     | W7, 3.5; K14, 1.6;                                                                                 |
| 1CP9        | 4                     | L25, 2.4; F26, 2.3; Y29, 5.0; D36, 1.8;                                                            |
| 1CUL        | 2                     | V413, 1.9; D424, 2.6;                                                                              |
| 1D8D        | 5                     | N234, 3.2; S235, 2.9; W237, 1.9; N238, 1.6; H241, 1.1;                                             |
| 1DE4        | 4                     | H74, 1.9; T77, 2.8; V78, 4.2; W81, 1.7;                                                            |
| 1DKF        | 2                     | E395, 1.7; Y402, 3.5;                                                                              |
| 1DML        | 3                     | L1227, 1.2; F1231, 5.3; L1234, 2.7;                                                                |
| 1DP5        | 8                     | V8, 2.9; I11, 1.5; F12, 2.8; L19, 1.6; D22, 2.0; V25, 1.0; V26, 1.9; F30, 2.3;                     |
| 1DX5        | 4                     | E14, 2.0; E14, 2.1; L14, 1.0; Y14, 3.6;                                                            |
| 1E0F        | 2                     | E14, 1.0; Y14, 2.9;                                                                                |
| 1E3A        | 5                     | E152, 3.2; I153, 2.1; D154, 1.7; N155, 2.6; L158, 2.3;                                             |
| 1E3A        | 7                     | W25, 3.5; L27, 3.0; F28, 1.9; Y29, 1.2; Y31, 6.1; Y33, 2.3; D38, 1.7;                              |
| 1E7P        | 2                     | Q225, 3.6; V236, 1.4;                                                                              |
| 1EER        | 2                     | R103, 2.9; L108, 1.2;                                                                              |
| 1EFU        | 3                     | F271, 4.4; V275, 3.4; M278, 1.0;                                                                   |
| 1F51        | 4                     | H630, 3.4; N634, 2.6; L638, 1.4; K640, 1.5;                                                        |
| 1F6F        | 4                     | H177, 1.7; R178, 4.6; S181, 1.5; K182, 1.2;                                                        |
| 1F80        | 4                     | R21, 1.7; R24, 2.4; F25, 1.2; R28, 3.9;                                                            |
| 1FM6        | 3                     | E394, 1.8; Y397, 3.1; E401, 1.2;                                                                   |
| 1FM6        | 3                     | I632, 3.2; L636, 1.2; L637, 2.0;                                                                   |
| 1FQJ        | 3                     | E203, 1.1; K206, 3.5; H209, 1.3;                                                                   |
| 1G5J        | 2                     | R313, 1.0; F319, 3.6;                                                                              |
| 1G73        | 4                     | H92, 5.3; Y95, 2.8; L96, 1.3; E99, 3.8;                                                            |
| 1GX7        | 3                     | F147, 2.5; W154, 4.1; E155, 1.9;                                                                   |
| 1GX7        | 6                     | K40, 1.3; Y42, 2.7; M43, 1.4; R46, 1.9; I47, 1.0; Y51, 5.0;                                        |
| 1GZL        | 2                     | L29, 1.0; W35, 4.1;                                                                                |
| 1H2S        | 2                     | T191, 1.2; L196, 2.8;                                                                              |
| 1H3O        | 3                     | F91, 2.3; I92, 1.8; V96, 1.8;                                                                      |
| 1H4L        | 3                     | W258, 3.6; L262, 1.8; I265, 1.5;                                                                   |
| 1HIA        | 2                     | W237, 2.8; I242, 3.0;                                                                              |
| 1HL6        | 4                     | Y125, 2.7; S136, 1.7; L140, 2.6; H141, 4.9;                                                        |
| 1HX1        | 2                     | R237, 2.8; D252, 2.1;                                                                              |
| 1HIR        | 3                     | L11, 1.1; R15, 2.4; W18, 3.5;                                                                      |
| 1I2M        | 4                     | N103, 1.0; R106, 3.2; D107, 2.0; R110, 2.0;                                                        |
| 1I5K        | 3                     | L310, 2.5; L313, 1.5; R317, 4.0;                                                                   |
| 1IBR        | 2                     | E281, 2.7; D288, 1.4;                                                                              |
| 1ID5        | 5                     | E14, 2.4; E14, 2.6; F14, 1.7; L14, 3.0; Y14, 3.8;                                                  |
| 1IHF        | 9                     | D22, 1.4; E25, 1.4; L26, 1.4; F30, 2.9; F31, 4.0; E33, 1.0; R35, 2.7; L38, 1.8; E39, 1.7;          |
| 1IHF        | 5                     | E28, 4.2; M29, 1.9; L30, 2.3; H32, 2.3; M33, 1.2;                                                  |
| 1J7D        | 3                     | F13, 4.6; E17, 1.0; E20, 1.0;                                                                      |
| 1JEK        | 4                     | W631, 1.7; I635, 1.3; H638, 3.1; L642, 2.5;                                                        |
| 1JFI        | 4                     | L138, 2.0; F146, 3.4; I147, 2.6; H148, 1.0;                                                        |
| 1JFI        | 3                     | L219, 1.1; Q222, 1.2; L225, 5.8;                                                                   |
| 1JM7        | 4                     | Q81, 1.1; E85, 2.2; L86, 7.7; D96, 1.0;                                                            |
| 1JYO        | 2                     | E111, 2.2; E118, 2.8;                                                                              |
| 1JYO        | 4                     | F83, 4.5; H85, 1.1; E89, 1.3; K90, 2.4;                                                            |
| 1LDK        | 3                     | M43, 1.3; Y46, 1.0; Y50, 4.6;                                                                      |

TABLE S3

Jochim, et al

| A. PDB CODE | L. HOTSPOT RESIDUE HELIX POSITIONS             | M. HOTSPOT RESIDUE END TO END LENGTH | N. HELIX LENGTH | O. HELIX START RESIDUE # | P. HELIX END RESIDUE # |
|-------------|------------------------------------------------|--------------------------------------|-----------------|--------------------------|------------------------|
| 1A93        | i; i+3; i+7; i+10;                             | 11                                   | 29              | 6                        | 34                     |
| 1AVO        | i; i+7; i+14; i+18;                            | 19                                   | 39              | 195                      | 233                    |
| 1AVO        | i; i+3; i+4; i+7; i+8; i+11; i+15;             | 16                                   | 38              | 8                        | 45                     |
| 1BCC        | i; i+15;                                       | 16                                   | 23              | 55                       | 77                     |
| 1BH8        | i; i+5; i+7; i+8; i+12;                        | 13                                   | 29              | 148                      | 176                    |
| 1BIQ        | i; i+8; i+11;                                  | 12                                   | 19              | 153                      | 171                    |
| 1BIQ        | i; i+4; i+7;                                   | 8                                    | 32              | 67                       | 98                     |
| 1BP3        | i; i+7;                                        | 8                                    | 30              | 6                        | 35                     |
| 1BPL        | i; i+1; i+4; i+7; i+8; i+11;                   | 12                                   | 18              | 206                      | 223                    |
| 1CDL        | i; i+1; i+2; i+7; i+9; i+10; i+12; i+14; i+15; | 16                                   | 17              | 798                      | 814                    |
| 1CCK        | i; i+7;                                        | 8                                    | 11              | 7                        | 17                     |
| 1CP9        | i; i+1; i+4; i+11;                             | 12                                   | 16              | 22                       | 37                     |
| 1CUL        | i; i+11;                                       | 12                                   | 22              | 409                      | 430                    |
| 1D8D        | i; i+1; i+3; i+4; i+7;                         | 8                                    | 13              | 234                      | 246                    |
| 1DE4        | i; i+3; i+4; i+7;                              | 8                                    | 28              | 59                       | 86                     |
| 1DKF        | i; i+7;                                        | 8                                    | 23              | 391                      | 413                    |
| 1DML        | i; i+4; i+7;                                   | 8                                    | 16              | 1220                     | 1235                   |
| 1DP5        | i; i+3; i+4; i+11; i+14; i+17; i+18; i+22 ;    | 23                                   | 29              | 3                        | 31                     |
| 1DX5        | i; i+2 ; i+3 ; i+7;                            | 8                                    | 9               | 14                       | 14                     |
| 1E0F        | i; i+5;                                        | 6                                    | 11              | 14A                      | 14J                    |
| 1E3A        | i; i+1; i+2; i+3; i+6;                         | 7                                    | 15              | 152                      | 166                    |
| 1E3A        | i; i+2; i+3; i+4; i+6; i+8; i+13;              | 14                                   | 16              | 24                       | 39                     |
| 1E7P        | i; i+11;                                       | 12                                   | 14              | 224                      | 237                    |
| 1EER        | i; i+5;                                        | 6                                    | 25              | 89                       | 113                    |
| 1EFU        | i; i+4; i+7;                                   | 8                                    | 9               | 271                      | 279                    |
| 1F51        | i; i+4; i+8; i+10;                             | 11                                   | 23              | 620                      | 642                    |
| 1F6F        | i; i+1; i+4; i+5;                              | 6                                    | 34              | 162                      | 195                    |
| 1F80        | i; i+3; i+4; i+7;                              | 8                                    | 10              | 21                       | 30                     |
| 1FM6        | i; i+3; i+7;                                   | 8                                    | 23              | 386                      | 408                    |
| 1FM6        | i; i+4; i+5;                                   | 6                                    | 9               | 631                      | 639                    |
| 1FQJ        | i; i+3; i+6;                                   | 7                                    | 10              | 201                      | 210                    |
| 1G5J        | i; i+6;                                        | 7                                    | 15              | 306                      | 320                    |
| 1G73        | i; i+3; i+4; i+7;                              | 8                                    | 48              | 72                       | 119                    |
| 1GX7        | i; i+7; i+8;                                   | 9                                    | 20              | 146                      | 165                    |
| 1GX7        | i; i+2; i+3; i+6; i+7; i+11;                   | 12                                   | 18              | 39                       | 56                     |
| 1GZL        | i; i+6;                                        | 7                                    | 43              | 2                        | 44                     |
| 1H2S        | i; i+5;                                        | 6                                    | 34              | 190                      | 223                    |
| 1H3O        | i; i+1; i+5;                                   | 6                                    | 22              | 85                       | 106                    |
| 1H4L        | i; i+4; i+7;                                   | 8                                    | 15              | 254                      | 268                    |
| 1HIA        | i; i+5;                                        | 6                                    | 11              | 235                      | 245                    |
| 1HL6        | i; i+11; i+15; i+16;                           | 17                                   | 27              | 117                      | 143                    |
| 1HX1        | i; i+15;                                       | 16                                   | 27              | 231                      | 257                    |
| 1HIR        | i; i+4; i+7;                                   | 8                                    | 27              | 9                        | 35                     |
| 1I2M        | i; i+3; i+4; i+7;                              | 8                                    | 13              | 101                      | 113                    |
| 1I5K        | i; i+3; i+7;                                   | 8                                    | 22              | 306                      | 327                    |
| 1IBR        | i; i+7;                                        | 8                                    | 26              | 273                      | 298                    |
| 1IDS        | i; i+2 ; i+3 ; i+4 ; i+7;                      | 8                                    | 9               | 14                       | 14                     |
| 1IHF        | i; i+3; i+4; i+8; i+9; i+11; i+13; i+16; i+17; | 18                                   | 21              | 20                       | 40                     |
| 1IHF        | i; i+1; i+2; i+4; i+5;                         | 6                                    | 21              | 19                       | 39                     |
| 1J7D        | i; i+4; i+7;                                   | 8                                    | 15              | 11                       | 25                     |
| 1JEK        | i; i+4; i+7; i+11;                             | 12                                   | 33              | 629                      | 661                    |
| 1JFI        | i; i+8; i+9; i+10;                             | 11                                   | 29              | 133                      | 161                    |
| 1JFI        | i; i+3; i+6;                                   | 7                                    | 28              | 215                      | 242                    |
| 1JM7        | i; i+4; i+5; i+15;                             | 16                                   | 19              | 80                       | 98                     |
| 1JYO        | i; i+7;                                        | 8                                    | 22              | 103                      | 124                    |
| 1JYO        | i; i+2; i+6; i+7;                              | 8                                    | 15              | 77                       | 91                     |
| 1LDK        | i; i+3; i+7;                                   | 8                                    | 14              | 40                       | 53                     |

TABLE S3

| A. PDB<br>CODE | Q. HELIX SEQUENCE                                 | R. RESOLUTION |
|----------------|---------------------------------------------------|---------------|
| 1A93           | MRRKNDTHQQDIDDLKRQNALLEQQVRAL                     | NOT APP       |
| 1AVO           | GDYRQLVHELDEAEYRDIRLMVMEIRNAYAVLYDIILKN           | 2.80          |
| 1AVO           | PEAQAKVDVFREDLCTKTENLLGSYFPKKISELDAFLK            | 2.80          |
| 1BCC           | TEELFDLHARDHCVAHKLFNSL                            | 3.16          |
| 1BH8           | QNVVIAMSGISKVFGVGEVVEEALDVCEKW                    | 3.00          |
| 1BIQ           | ISSYYDELIEMTSYWHLG                                | 2.05          |
| 1BIQ           | EHEKHIFISNLKYQTLSDSIQGRSPNVALLPL                  | 2.05          |
| 1BP3           | LSRLFDNAMLRAHRLHQLAFDITYQEFEEAY                   | 2.90          |
| 1BPL           | PDVAAEIKRWGTWYANEL                                | 2.20          |
| 1CDL           | RKWQKTGHAVRAIGRLS                                 | 2.00          |
| 1CKK           | WTTVILVKSML                                       | NOT APP       |
| 1CP9           | TYSLFYGYGYAVAQDR                                  | 2.50          |
| 1CUL           | AQELVMTLNELFARFDKLAEN                             | 2.40          |
| 1D8D           | NSVWNQRHFVISN                                     | 2.00          |
| 1DE4           | SQMWLQLSQLKGDHMFVDFWTFIMEN                        | 2.80          |
| 1DKF           | PAEVEALREKVYASLEAYCKHKY                           | 2.50          |
| 1DML           | AEETRRMLHRAFDTLA                                  | 2.70          |
| 1DP5           | TDQQKVSEIFQSSKEKLQGDAAKVVSDAFM                    | 2.20          |
| 1DX5           | ERELLESYI                                         | 2.30          |
| 1E0F           | KTERELLESYI                                       | 3.10          |
| 1E3A           | EIDNLALLTALKDKY                                   | 1.80          |
| 1E3A           | TWHLFYGYGYVVAQDR                                  | 1.80          |
| 1E7P           | LQSKIAYLRRKMVS                                    | 3.10          |
| 1EER           | EPLQLHVDKAVSGLRSLTLLRALG                          | 1.90          |
| 1EFU           | FAAEVAAMS                                         | 2.50          |
| 1F51           | ELIHLLGHSRHDWMNKLQLIKGN                           | 3.00          |
| 1F6F           | ENVRRVAFYRLFHCLHRDSSKIYTYLRILKCRLT                | 2.30          |
| 1F80           | RQKRFAERIL                                        | 2.30          |
| 1FM6           | PAEVEALREKVYASLEAYCKHKY                           | 2.10          |
| 1FM6           | KILHRLLEQE                                        | 2.10          |
| 1FQJ           | RSERKKWIHC                                        | 2.02          |
| 1G5J           | QRYGRELRRMSDEFV                                   | NOT APP       |
| 1G73           | EEEEDEVWQVIIGARAEMTSKHQEYLKLETTWMTAVGLSEMAAAEAYQT | 2.00          |
| 1GX7           | EFTADVTIWEEGSEFVERLT                              | NOT APP       |
| 1GX7           | IKDYMLDRINGVYGADAK                                | NOT APP       |
| 1GZL           | MKQIEDKIEEIESKQKKIENEIARIKLLQLTVWGIKQLQARI        | 1.80          |
| 1H2S           | PTVDVALIVYLDLVTKVGFIALDAAATLRAEH                  | 1.93          |
| 1H30           | LQIADDFIESVVTAAACQLARHR                           | 2.30          |
| 1H4L           | KEAFWDRCLSVINLM                                   | 2.65          |
| 1HIA           | LDWIDDTITEN                                       | 2.40          |
| 1HL6           | PEGLRCFYLVQDLKCLVFSLIGLHFK                        | 2.50          |
| 1HX1           | KDSRLKRKGLVKKVQAFLAECDTVEQN                       | 1.90          |
| 1I1R           | KDLLIQRNLNMLWVIDEFCFRDLCYRTG                      | 2.40          |
| 1I2M           | VPNWHRDLVRVCE                                     | 1.76          |
| 1I5K           | ADAELQRLKNERHEEAELERLK                            | 2.70          |
| 1IBR           | DEVALQGIEFWSNVCDEEMDLAIEAS                        | 2.30          |
| 1ID5           | EKELFESYI                                         | 2.50          |
| 1IHF           | KRDAKELVELFFEEIRRALEN                             | 2.20          |
| 1IHF           | AKTVEDAVKEMLEHMASTLAQ                             | 2.20          |
| 1J7D           | RNFRLLLEELEEGQKG                                  | 1.85          |
| 1JEK           | QQWEEIEQHEGNLSLLLREAALQVHIAQRDAR                  | 1.50          |
| 1JFI           | NDARELVVNCCTEFIHLSSEANEICNKS                      | 2.62          |
| 1JFI           | EEELLRQQQELFAKARQQQAEQAQEWL                       | 2.62          |
| 1JM7           | SQLVEELLKIICAFQLDTG                               | NOT APP       |
| 1JYO           | TYHIISQLESFVNQAEALKNIL                            | 1.90          |
| 1JYO           | QKILQTFLHALTEKY                                   | 1.90          |
| 1LDK           | SRYMELYTHVYNYC                                    | 3.10          |

TABLE S3

Jochim, et al

| A. PDB CODE | B. INTERFACE CHAINS | C. CHAIN | D. TITLE                                                                                |
|-------------|---------------------|----------|-----------------------------------------------------------------------------------------|
| 1LQB        | A B                 | B        | CRYSTAL STRUCTURE OF A HYDROXYLATED HIF-1 ALPHA PEPTIDE BOUND TO THE PVHL/ELONGIN-C/EL  |
| 1LUJ        | A B                 | A        | CRYSTAL STRUCTURE OF THE BETA-CATENIN/ICAT COMPLEX                                      |
| 1M1E        | A B                 | A        | BETA-CATENIN ARMADILLO REPEAT DOMAIN BOUND TO ICAT                                      |
| 1M63        | A B                 | A        | CRYSTAL STRUCTURE OF CALCINEURIN-CYCLOPHILIN-CYCLOSPORIN SHOWS COMMON BUT DISTINCT I    |
| 1MF8        | A B                 | A        | CRYSTAL STRUCTURE OF HUMAN CALCINEURIN COMPLEXED WITH CYCLOSPORIN A AND HUMAN CYCI      |
| 1MXE        | A E                 | E        | STRUCTURE OF THE COMPLEX OF CALMODULIN WITH THE TARGET SEQUENCE OF CAMKI                |
| 1N1J        | A B                 | A        | CRYSTAL STRUCTURE OF THE NF-YB/NF-YC HISTONE PAIR                                       |
| 1N1J        | A B                 | A        | CRYSTAL STRUCTURE OF THE NF-YB/NF-YC HISTONE PAIR                                       |
| 1N1J        | A B                 | B        | CRYSTAL STRUCTURE OF THE NF-YB/NF-YC HISTONE PAIR                                       |
| 1N2D        | A C                 | C        | TERNARY COMPLEX OF MLC1P BOUND TO IQ2 AND IQ3 OF MYO2P, A CLASS V MYOSIN                |
| 1N4Q        | E F                 | F        | PROTEIN GERANYLGERANYLTRANSFERASE TYPE-I COMPLEXED WITH A GGPP ANALOG AND A KKKSKTI     |
| 1NGM        | E F                 | F        | CRYSTAL STRUCTURE OF A YEAST BRFI-TBP-DNA TERNARY COMPLEX                               |
| 1NH2        | B D                 | B        | CRYSTAL STRUCTURE OF A YEAST TFIIA/TBP/DNA COMPLEX                                      |
| 1NH2        | B D                 | B        | CRYSTAL STRUCTURE OF A YEAST TFIIA/TBP/DNA COMPLEX                                      |
| 1NH2        | B D                 | D        | CRYSTAL STRUCTURE OF A YEAST TFIIA/TBP/DNA COMPLEX                                      |
| 1NU7        | B D                 | D        | STAPHYLOCOAGULASE-THROMBIN COMPLEX                                                      |
| 1NU9        | D F                 | F        | STAPHYLOCOAGULASE-PRETHROMBIN-2 COMPLEX                                                 |
| 1NVM        | G H                 | G        | CRYSTAL STRUCTURE OF A BIFUNCTIONAL ALDOLASE-DEHYDROGENASE : SEQUESTERING A REACTIVE    |
| 1NX0        | A C                 | C        | STRUCTURE OF CALPAIN DOMAIN 6 IN COMPLEX WITH CALPASTATIN DIC                           |
| 1O00        | A B                 | A        | CRYSTAL STRUCTURE OF THE DROSOPHILA MAGO NASHI-Y14 COMPLEX                              |
| 1OQP        | A B                 | B        | STRUCTURE OF THE CA2+/C-TERMINAL DOMAIN OF CALTRACTIN IN COMPLEX WITH THE CDC31P-BINDI  |
| 1OQS        | A B                 | A        | CRYSTAL STRUCTURE OF RV4/RV7 COMPLEX                                                    |
| 1OR0        | A B                 | A        | CRYSTAL STRUCTURES OF GLUTARYL 7-AMINOCEPHALOSPORANIC ACID ACYLASE: INSIGHT INTO AUTC   |
| 1OR0        | A B                 | A        | CRYSTAL STRUCTURES OF GLUTARYL 7-AMINOCEPHALOSPORANIC ACID ACYLASE: INSIGHT INTO AUTC   |
| 1OR0        | C D                 | C        | CRYSTAL STRUCTURES OF GLUTARYL 7-AMINOCEPHALOSPORANIC ACID ACYLASE: INSIGHT INTO AUTC   |
| 1OR7        | A C                 | C        | CRYSTAL STRUCTURE OF ESCHERICHIA COLI SIGMAE WITH THE CYTOPLASMIC DOMAIN OF ITS ANTI-SI |
| 1OR7        | A C                 | C        | CRYSTAL STRUCTURE OF ESCHERICHIA COLI SIGMAE WITH THE CYTOPLASMIC DOMAIN OF ITS ANTI-SI |
| 1OXX        | A B                 | B        | COMPLEX BETWEEN YPD1 AND SLN1 RESPONSE REGULATOR DOMAIN IN SPACE GROUP P3(2)            |
| 1P27        | A B                 | A        | CRYSTAL STRUCTURE OF THE HUMAN Y14/MAGOH COMPLEX                                        |
| 1PGR        | E F                 | E        | 2:2 COMPLEX OF G-CSF WITH ITS RECEPTOR                                                  |
| 1PQ1        | A B                 | B        | CRYSTAL STRUCTURE OF BCL-XL/BIM                                                         |
| 1PZL        | A B                 | B        | CRYSTAL STRUCTURE OF HNF4A LBD IN COMPLEX WITH THE LIGAND AND THE COACTIVATOR SRC-1 PEI |
| 1QZ7        | A B                 | B        | BETA-CATENIN BINDING DOMAIN OF AXIN IN COMPLEX WITH BETA- CATENIN                       |
| 1R4M        | A B                 | A        | APPBP1-UBA3-NEDD8, AN E1-UBIQUITIN-LIKE PROTEIN COMPLEX                                 |
| 1R8U        | A B                 | A        | NMR STRUCTURE OF CBP TAZ1/CITED2 COMPLEX                                                |
| 1RF8        | A B                 | B        | SOLUTION STRUCTURE OF THE YEAST TRANSLATION INITIATION FACTOR EIF4E IN COMPLEX WITH M7G |
| 1RIW        | B C                 | C        | THROMBIN IN COMPLEX WITH NATURAL PRODUCT INHIBITOR OSCILLARIN                           |
| 1RK8        | A B                 | B        | STRUCTURE OF THE CYTOSOLIC PROTEIN PYM BOUND TO THE MAGO- Y14 CORE OF THE EXON JUNCTIO  |
| 1RM1        | B C                 | B        | STRUCTURE OF A YEAST TFIIA/TBP/TATA-BOX DNA COMPLEX                                     |
| 1RM1        | B C                 | B        | STRUCTURE OF A YEAST TFIIA/TBP/TATA-BOX DNA COMPLEX                                     |
| 1RP3        | A B                 | B        | COCRYSTAL STRUCTURE OF THE FLAGELLAR SIGMA/ANTI-SIGMA COMPLEX, SIGMA-28/FLGM            |
| 1RP3        | E F                 | E        | COCRYSTAL STRUCTURE OF THE FLAGELLAR SIGMA/ANTI-SIGMA COMPLEX, SIGMA-28/FLGM            |
| 1SA0        | C D                 | C        | TUBULIN-COLCHICINE: STATHMIN-LIKE DOMAIN COMPLEX                                        |
| 1SB0        | A B                 | B        | SOLUTION STRUCTURE OF THE KIX DOMAIN OF CBP BOUND TO THE TRANSACTIVATION DOMAIN OF C-A  |
| 1SYQ        | A B                 | B        | HUMAN VINCULIN HEAD DOMAIN VH1, RESIDUES 1-258, IN COMPLEX WITH HUMANTALIN'S VINCULIN B |
| 1TCO        | A B                 | A        | TERNARY COMPLEX OF A CALCINEURIN A FRAGMENT, CALCINEURIN B, FKBP12 AND THE IMMUNOSUPP   |
| 1TI2        | A B                 | B        | CRYSTAL STRUCTURE OF PYROGALLOL-PHLOROGLUCINOL TRANSHYDROXYLASE FROM PELOBACTER         |
| 1TN6        | A B                 | A        | PROTEIN FARNESYLTRANSFERASE COMPLEXED WITH A RAP2A PEPTIDE SUBSTRATE AND A FPP ANALOG   |
| 1TQY        | A B                 | B        | THE ACTINORHODIN KETOSYNTHASE/CHAIN LENGTH FACTOR                                       |
| 1TQY        | C D                 | C        | THE ACTINORHODIN KETOSYNTHASE/CHAIN LENGTH FACTOR                                       |
| 1TQY        | E F                 | E        | THE ACTINORHODIN KETOSYNTHASE/CHAIN LENGTH FACTOR                                       |
| 1TUE        | H J                 | J        | THE X-RAY STRUCTURE OF THE PAPILLOMAVIRUS HELICASE IN COMPLEX WITH ITS MOLECULAR MATC   |
| 1TY4        | A C                 | C        | CRYSTAL STRUCTURE OF A CED-9/EGL-1 COMPLEX                                              |
| 1UKL        | A C                 | C        | CRYSTAL STRUCTURE OF IMPORTIN-BETA AND SREBP-2 COMPLEX                                  |
| 1UKV        | G Y                 | G        | STRUCTURE OF RABGDP-DISSOCIATION INHIBITOR IN COMPLEX WITH PRENYLATED YPT1 GTPASE       |
| 1VCB        | K L                 | L        | THE VHL-ELONGIN-C-ELONGINB STRUCTURE                                                    |
| 1VF6        | A C                 | C        | 2.1 ANGSTROM CRYSTAL STRUCTURE OF THE PALS-1-L27N AND PATJ L27 HETERODIMER COMPLEX      |

TABLE S3

Jochim, et al

| A. PDB<br>CODE | E. FUNCTION                           | F. $\Delta\Delta G_{\text{AVG,HELIX}}$<br>(KCAL/MOL) | G. $\Delta\Delta G_{\text{SUM,HELIX}}$<br>(KCAL/MOL) | H. $\Delta\Delta G_{\text{SUM,CHAIN}}$<br>(KCAL/MOL) | I. HELIX<br>CONTRIBUTION |
|----------------|---------------------------------------|------------------------------------------------------|------------------------------------------------------|------------------------------------------------------|--------------------------|
| 1LQB           | GENE REGULATION                       | 2.3                                                  | 9.0                                                  | 12.1                                                 | 74%                      |
| 1LUJ           | STRUCTURAL PROTEIN                    | 2.0                                                  | 7.9                                                  | 10.0                                                 | 79%                      |
| 1M1E           | STRUCTURAL PROTEIN                    | 2.4                                                  | 4.8                                                  | 15.4                                                 | 31%                      |
| 1M63           | HYDROLASE/ISOMERASE                   | 2.0                                                  | 9.9                                                  | 22.4                                                 | 44%                      |
| 1MF8           | HYDROLASE, LIGASE                     | 2.1                                                  | 10.4                                                 | 33.6                                                 | 31%                      |
| 1MXE           | METAL BINDING PROTEIN                 | 2.4                                                  | 23.8                                                 | 27.5                                                 | 87%                      |
| 1N1J           | DNA BINDING PROTEIN                   | 4.3                                                  | 17.3                                                 | 23.2                                                 | 75%                      |
| 1N1J           | DNA BINDING PROTEIN                   | 2.0                                                  | 4.0                                                  | 23.2                                                 | 17%                      |
| 1N1J           | DNA BINDING PROTEIN                   | 2.5                                                  | 17.2                                                 | 43.7                                                 | 39%                      |
| 1N2D           | CELL CYCLE                            | 2.0                                                  | 15.7                                                 | 15.7                                                 | 100%                     |
| 1N4Q           | TRANSFERASE                           | 2.0                                                  | 7.9                                                  | 46.8                                                 | 17%                      |
| 1NGM           | TRANSCRIPTION/DNA                     | 2.6                                                  | 5.2                                                  | 15.8                                                 | 33%                      |
| 1NH2           | TRANSCRIPTION/DNA                     | 2.2                                                  | 8.7                                                  | 20.3                                                 | 43%                      |
| 1NH2           | TRANSCRIPTION/DNA                     | 2.5                                                  | 10.0                                                 | 20.3                                                 | 49%                      |
| 1NH2           | TRANSCRIPTION/DNA                     | 2.3                                                  | 6.8                                                  | 9.3                                                  | 73%                      |
| 1NU7           | HYDROLASE/PROTEIN BINDING             | 2.0                                                  | 6.1                                                  | 15.2                                                 | 40%                      |
| 1NU9           | HYDROLASE/PROTEIN BINDING             | 3.2                                                  | 6.3                                                  | 7.4                                                  | 85%                      |
| 1NVM           | LYASE/OXIDOREDUCTASE                  | 2.1                                                  | 6.3                                                  | 17.2                                                 | 37%                      |
| 1NX0           | HYDROLASE                             | 2.2                                                  | 6.7                                                  | 9.8                                                  | 68%                      |
| 1O00           | SIGNALING PROTEIN                     | 2.2                                                  | 13.0                                                 | 20.8                                                 | 63%                      |
| 1OQP           | PROTEIN BINDING                       | 2.5                                                  | 12.7                                                 | 12.7                                                 | 100%                     |
| 1OQS           | HYDROLASE                             | 3.0                                                  | 5.9                                                  | 17.4                                                 | 34%                      |
| 1OR0           | HYDROLASE                             | 2.2                                                  | 10.8                                                 | 58.0                                                 | 19%                      |
| 1OR0           | HYDROLASE                             | 4.0                                                  | 7.9                                                  | 58.0                                                 | 14%                      |
| 1OR0           | HYDROLASE                             | 3.2                                                  | 9.7                                                  | 63.2                                                 | 15%                      |
| 1OR7           | TRANSCRIPTION                         | 2.0                                                  | 5.9                                                  | 33.3                                                 | 18%                      |
| 1OR7           | TRANSCRIPTION                         | 2.2                                                  | 11.1                                                 | 33.3                                                 | 33%                      |
| 1OXK           | SIGNALING PROTEIN                     | 2.7                                                  | 8.2                                                  | 11.7                                                 | 70%                      |
| 1P27           | RNA BINDING PROTEIN                   | 2.3                                                  | 7.0                                                  | 15.0                                                 | 47%                      |
| 1PGR           | CYTOKINE                              | 2.2                                                  | 6.5                                                  | 7.9                                                  | 82%                      |
| 1PQ1           | APOPTOSIS                             | 2.3                                                  | 20.4                                                 | 20.4                                                 | 100%                     |
| 1PZL           | TRANSCRIPTION                         | 2.2                                                  | 8.7                                                  | 8.7                                                  | 100%                     |
| 1QZ7           | CELL ADHESION                         | 2.0                                                  | 10.1                                                 | 10.1                                                 | 100%                     |
| 1R4M           | CELL CYCLE                            | 2.1                                                  | 6.3                                                  | 24.4                                                 | 26%                      |
| 1R8U           | TRANSCRIPTION/TRANSCRIPTION ACTIVATOR | 2.1                                                  | 6.2                                                  | 13.8                                                 | 45%                      |
| 1RF8           | BIOSYNTHETIC PROTEIN, TRANSLATION     | 2.1                                                  | 6.4                                                  | 15.1                                                 | 42%                      |
| 1RIW           | HYDROLASE/BLOOD CLOTTING              | 2.8                                                  | 11.2                                                 | 64.3                                                 | 17%                      |
| 1RK8           | TRANSLATION                           | 2.5                                                  | 10.0                                                 | 15.4                                                 | 65%                      |
| 1RM1           | TRANSCRIPTION/DNA                     | 2.1                                                  | 8.5                                                  | 29.3                                                 | 29%                      |
| 1RM1           | TRANSCRIPTION/DNA                     | 2.0                                                  | 9.8                                                  | 29.3                                                 | 33%                      |
| 1RP3           | TRANSCRIPTION                         | 2.2                                                  | 17.7                                                 | 31.0                                                 | 57%                      |
| 1RP3           | TRANSCRIPTION                         | 2.0                                                  | 10.0                                                 | 25.0                                                 | 40%                      |
| 1SA0           | CELL CYCLE                            | 2.6                                                  | 7.8                                                  | 22.0                                                 | 35%                      |
| 1SB0           | TRANSCRIPTION                         | 2.2                                                  | 6.5                                                  | 6.5                                                  | 100%                     |
| 1SYQ           | CELL ADHESION                         | 2.0                                                  | 14.1                                                 | 14.1                                                 | 100%                     |
| 1TCO           | COMPLEX (HYDROLASE/ISOMERASE)         | 2.3                                                  | 16.1                                                 | 22.5                                                 | 72%                      |
| 1TI2           | OXIDOREDUCTASE                        | 2.1                                                  | 6.3                                                  | 52.3                                                 | 12%                      |
| 1TN6           | TRANSFERASE                           | 2.0                                                  | 6.0                                                  | 55.1                                                 | 11%                      |
| 1TQY           | TRANSFERASE                           | 2.2                                                  | 8.8                                                  | 30.6                                                 | 29%                      |
| 1TQY           | TRANSFERASE                           | 2.0                                                  | 3.9                                                  | 38.9                                                 | 10%                      |
| 1TQY           | TRANSFERASE                           | 2.0                                                  | 5.9                                                  | 28.4                                                 | 21%                      |
| 1TUE           | REPLICATION                           | 3.3                                                  | 10.0                                                 | 10.0                                                 | 100%                     |
| 1TY4           | APOPTOSIS                             | 2.1                                                  | 8.4                                                  | 13.8                                                 | 61%                      |
| 1UKL           | PROTEIN TRANSPORT/DNA BINDING PROTEIN | 2.0                                                  | 3.9                                                  | 6.8                                                  | 57%                      |
| 1UKV           | PROTEIN TRANSPORT                     | 2.3                                                  | 9.0                                                  | 18.5                                                 | 49%                      |
| 1VCB           | TRANSCRIPTION                         | 2.0                                                  | 7.8                                                  | 7.8                                                  | 100%                     |
| 1VF6           | PROTEIN BINDING/PROTEIN TRANSPORT     | 2.0                                                  | 3.9                                                  | 21.9                                                 | 18%                      |



TABLE S3

| A. PDB CODE | J. # HOTSPOT RESIDUES | K. HOTSPOT RESIDUES, RESIDUE #, $\Delta\Delta G$ (KCAL/MOL)                                                   |
|-------------|-----------------------|---------------------------------------------------------------------------------------------------------------|
| 1LQB        | 4                     | H68, 3.0; M75, 1.1; Y79, 1.4; R82, 3.5;                                                                       |
| 1LUJ        | 4                     | T653, 1.3; Y654, 1.8; F660, 2.7; R661, 2.1;                                                                   |
| 1M1E        | 2                     | T653, 1.1; F660, 3.7;                                                                                         |
| 1M63        | 5                     | F350, 4.8; W352, 1.5; L354, 1.1; K360, 1.1; V361, 1.4;                                                        |
| 1MF8        | 5                     | V361, 1.6; M364, 3.7; L365, 1.8; V368, 1.8; L369, 1.5;                                                        |
| 1MXE        | 10                    | F298, 2.8; K302, 1.6; W303, 6.9; K304, 1.1; F307, 2.6; V312, 1.4; V313, 1.6; R314, 2.1; H315, 1.8; M316, 1.9; |
| 1N1J        | 4                     | Y128, 2.4; L132, 1.5; Y135, 1.4; L136, 12.0;                                                                  |
| 1N1J        | 2                     | V84, 1.1; I92, 2.9;                                                                                           |
| 1N1J        | 7                     | V67, 1.1; L68, 2.7; F69, 4.7; K71, 1.5; I75, 1.3; I77, 3.0; W85, 2.9;                                         |
| 1N2D        | 8                     | K812, 1.4; L814, 2.5; Q815, 2.8; I818, 1.7; F821, 2.4; I822, 1.4; I823, 1.1; R824, 2.4;                       |
| 1N4Q        | 4                     | K243, 1.7; R250, 2.1; W251, 2.2; I253, 1.9;                                                                   |
| 1NGM        | 2                     | S480, 1.5; W487, 3.7;                                                                                         |
| 1NH2        | 4                     | L38, 2.1; W42, 3.7; K45, 1.6; L46, 1.3;                                                                       |
| 1NH2        | 4                     | V9, 1.0; Y10, 5.0; I13, 2.4; V17, 1.6;                                                                        |
| 1NH2        | 3                     | I15, 3.3; L19, 2.0; L26, 1.5;                                                                                 |
| 1NU7        | 3                     | L67, 3.0; Q71, 2.1; L74, 1.0;                                                                                 |
| 1NU9        | 2                     | K59, 4.9; L67, 1.4;                                                                                           |
| 1NVM        | 3                     | M328, 1.6; D331, 3.6; D335, 1.1;                                                                              |
| 1NX0        | 3                     | I603, 2.4; L606, 2.9; D609, 1.4;                                                                              |
| 1OOO        | 6                     | Y125, 1.9; D129, 1.8; L133, 1.2; S136, 1.7; L140, 2.5; H141, 3.9;                                             |
| 1OQP        | 5                     | E245, 1.4; K247, 1.0; W248, 5.7; L251, 2.4; L252, 2.2;                                                        |
| 1OQS        | 2                     | F3, 4.4; I9, 1.5;                                                                                             |
| 1OR0        | 5                     | F39, 1.7; Y40, 2.8; Y42, 2.5; Q46, 2.5;                                                                       |
| 1OR0        | 2                     | F100, 3.8; F107, 4.1;                                                                                         |
| 1OR0        | 3                     | E74, 1.8; V78, 1.0; W79, 6.9;                                                                                 |
| 1OR7        | 3                     | I55, 1.9; V59, 1.9; I63, 2.1;                                                                                 |
| 1OR7        | 5                     | W33, 2.8; H37, 2.4; L38, 1.2; I39, 2.4; M43, 2.3;                                                             |
| 1OXX        | 3                     | V1098, 1.7; R1105, 2.9; M1106, 3.6;                                                                           |
| 1P27        | 3                     | Y124, 2.6; S135, 2.2; H140, 2.2;                                                                              |
| 1PGR        | 3                     | K17, 1.3; E20, 3.4; R23, 1.8;                                                                                 |
| 1PQ1        | 9                     | F101, 4.3; Y105, 2.8; E87, 1.7; I90, 1.5; E93, 1.0; L94, 1.9; R95, 1.6; I97, 2.0; D99, 3.6;                   |
| 1PZL        | 4                     | L10, 2.3; H11, 1.1; L14, 3.5; Q15, 1.8;                                                                       |
| 1QZ7        | 5                     | E470, 1.0; L473, 2.9; D474, 2.3; H476, 2.9; V480, 1.0;                                                        |
| 1R4M        | 3                     | T492, 1.3; F496, 1.5; Q503, 3.5;                                                                              |
| 1R8U        | 3                     | E225, 1.7; L228, 2.1; L231, 2.4;                                                                              |
| 1RF8        | 3                     | F282, 6.6; K287, 2.5; K289, 2.4;                                                                              |
| 1RIW        | 4                     | W279, 6.0; I280, 1.6; V283, 1.7; I284, 1.9;                                                                   |
| 1RK8        | 4                     | L133, 1.0; S136, 2.0; L140, 2.7; H141, 4.3;                                                                   |
| 1RM1        | 4                     | T14, 1.2; I15, 4.0; L23, 1.2; L26, 2.1;                                                                       |
| 1RM1        | 5                     | L36, 3.0; R39, 1.6; V40, 1.3; V47, 1.9; L52, 2.0;                                                             |
| 1RP3        | 8                     | D76, 1.8; K78, 1.5; V79, 1.4; V80, 1.7; L83, 2.3; I84, 1.7; F86, 2.5; F87, 4.8;                               |
| 1RP3        | 5                     | K190, 1.8; Q194, 2.1; L195, 1.2; F197, 2.4; Y198, 2.5;                                                        |
| 1SA0        | 3                     | H406, 2.1; W407, 4.5; E411, 1.2;                                                                              |
| 1SB0        | 3                     | E105, 1.1; L95, 2.0; L99, 3.4;                                                                                |
| 1SYQ        | 7                     | L608, 2.2; L609, 1.1; K613, 1.1; L615, 3.0; L622, 3.0; L623, 2.5; R624, 1.2;                                  |
| 1TCO        | 7                     | V349, 1.3; F350, 5.1; L354, 1.8; F356, 3.0; K360, 1.0; M364, 1.6; L369, 2.3;                                  |
| 1TI2        | 3                     | N18, 1.4; D25, 1.5; E26, 3.4;                                                                                 |
| 1TN6        | 3                     | Y355, 1.8; Y358, 2.6; R361, 1.6;                                                                              |
| 1TQY        | 4                     | F109, 1.0; F116, 3.8; L119, 1.7; W120, 2.3;                                                                   |
| 1TQY        | 2                     | P149, 1.1; W154, 2.8;                                                                                         |
| 1TQY        | 3                     | L114, 1.1; Y118, 3.8; L119, 1.0;                                                                              |
| 1TUE        | 3                     | I19, 2.4; Y23, 5.5; E24, 2.1;                                                                                 |
| 1TY4        | 4                     | I50, 1.5; I54, 3.3; K57, 1.1; L58, 2.5;                                                                       |
| 1UKL        | 2                     | R371, 1.7; Y376, 2.2;                                                                                         |
| 1UKV        | 4                     | E241, 1.9; Q244, 2.2; R248, 3.9; I252, 1.0;                                                                   |
| 1VCB        | 4                     | L158, 3.4; R161, 2.4; V166, 1.0; L169, 1.0;                                                                   |
| 1VF6        | 2                     | F159, 1.4; H166, 2.5;                                                                                         |

TABLE S3

Jochim, et al

| A. PDB CODE | L. HOTSPOT RESIDUE HELIX POSITIONS                   | M. HOTSPOT RESIDUE END TO END LENGTH | N. HELIX LENGTH | O. HELIX START RESIDUE # | P. HELIX END RESIDUE # |
|-------------|------------------------------------------------------|--------------------------------------|-----------------|--------------------------|------------------------|
| 1LQB        | i; i+7; i+11; i+14;                                  | 15                                   | 17              | 67                       | 83                     |
| 1LUJ        | i; i+1; i+7; i+8;                                    | 9                                    | 14              | 649                      | 662                    |
| 1M1E        | i; i+7;                                              | 8                                    | 15              | 649                      | 663                    |
| 1M63        | i; i+2; i+4; i+10; i+11;                             | 12                                   | 15              | 349                      | 363                    |
| 1MF8        | i; i+3; i+4; i+7; i+8;                               | 9                                    | 12              | 359                      | 370                    |
| 1MXE        | i; i+4; i+5; i+6; i+9; i+14; i+15; i+16; i+17; i+18; | 19                                   | 21              | 298                      | 318                    |
| 1N1J        | i; i+4; i+7; i+8;                                    | 9                                    | 15              | 126                      | 140                    |
| 1N1J        | i; i+8;                                              | 9                                    | 29              | 78                       | 106                    |
| 1N1J        | i; i+1; i+2; i+4; i+8; i+10; i+18;                   | 19                                   | 29              | 63                       | 91                     |
| 1N2D        | i; i+2; i+3; i+6; i+9; i+10; i+11; i+12;             | 12                                   | 46              | 808                      | 853                    |
| 1N4Q        | i; i+7; i+8; i+10;                                   | 11                                   | 13              | 242                      | 254                    |
| 1NGM        | i; i+7;                                              | 8                                    | 15              | 477                      | 491                    |
| 1NH2        | i; i+4; i+7; i+8;                                    | 9                                    | 17              | 32                       | 48                     |
| 1NH2        | i; i+1; i+4; i+8;                                    | 9                                    | 18              | 4                        | 21                     |
| 1NH2        | i; i+4; i+11;                                        | 12                                   | 16              | 14                       | 29                     |
| 1NU7        | i; i+4; i+7;                                         | 8                                    | 40              | 56                       | 95                     |
| 1NU9        | i; i+8;                                              | 9                                    | 40              | 56                       | 95                     |
| 1NVM        | i; i+3; i+7;                                         | 8                                    | 15              | 326                      | 340                    |
| 1NX0        | i; i+3; i+6;                                         | 7                                    | 9               | 602                      | 610                    |
| 1OO0        | i; i+4; i+8; i+11; i+15; i+16;                       | 17                                   | 26              | 117                      | 142                    |
| 1OQP        | i; i+2; i+3; i+6; i+7;                               | 8                                    | 14              | 240                      | 253                    |
| 1OQS        | i; i+6;                                              | 7                                    | 13              | 2                        | 14                     |
| 1OR0        | i; i+1; i+3; i+7;                                    | 8                                    | 16              | 35                       | 50                     |
| 1OR0        | i; i+7;                                              | 8                                    | 21              | 98                       | 118                    |
| 1OR0        | i; i+4; i+5;                                         | 6                                    | 10              | 74                       | 83                     |
| 1OR7        | i; i+4; i+8;                                         | 9                                    | 11              | 55                       | 65                     |
| 1OR7        | i; i+4; i+5; i+6; i+10;                              | 11                                   | 18              | 27                       | 44                     |
| 1OXX        | i; i+7; i+8;                                         | 9                                    | 14              | 1097                     | 1110                   |
| 1P27        | i; i+11; i+16;                                       | 17                                   | 26              | 116                      | 141                    |
| 1PGR        | i; i+3; i+6;                                         | 7                                    | 29              | 12                       | 40                     |
| 1PQ1        | i; i+3; i+6; i+7; i+8; i+10; i+12; i+14; i+18;       | 19                                   | 27              | 86                       | 112                    |
| 1PZL        | i; i+1; i+4; i+5;                                    | 6                                    | 11              | 8                        | 18                     |
| 1QZ7        | i; i+3; i+4; i+6; i+10;                              | 11                                   | 12              | 470                      | 481                    |
| 1R4M        | i; i+4; i+11;                                        | 12                                   | 21              | 491                      | 511                    |
| 1R8U        | i; i+3; i+6;                                         | 7                                    | 12              | 225                      | 236                    |
| 1RF8        | i; i+5; i+7;                                         | 8                                    | 12              | 280                      | 291                    |
| 1RIW        | i; i+1; i+4; i+5;                                    | 6                                    | 10              | 277                      | 286                    |
| 1RK8        | i; i+3; i+7; i+8;                                    | 9                                    | 26              | 117                      | 142                    |
| 1RM1        | i; i+1; i+9; i+12;                                   | 13                                   | 16              | 14                       | 29                     |
| 1RM1        | i; i+3; i+4; i+11; i+16;                             | 17                                   | 22              | 34                       | 55                     |
| 1RP3        | i; i+2; i+3; i+4; i+7; i+8; i+10; i+11;              | 11                                   | 13              | 76                       | 88                     |
| 1RP3        | i; i+4; i+5; i+7; i+8;                               | 9                                    | 13              | 187                      | 199                    |
| 1SA0        | i; i+1; i+5;                                         | 6                                    | 8               | 405                      | 412                    |
| 1SB0        | i; i+4; i+10;                                        | 11                                   | 21              | 89                       | 109                    |
| 1SYQ        | i; i+1; i+5; i+7; i+14; i+15; i+16;                  | 17                                   | 20              | 608                      | 627                    |
| 1TCO        | i; i+1; i+5; i+7; i+11; i+15; i+20;                  | 21                                   | 22              | 349                      | 370                    |
| 1TI2        | i; i+7; i+8;                                         | 9                                    | 12              | 18                       | 29                     |
| 1TN6        | i; i+3; i+6;                                         | 7                                    | 15              | 353                      | 367                    |
| 1TQY        | i; i+7; i+10; i+11;                                  | 12                                   | 15              | 109                      | 123                    |
| 1TQY        | i; i+5;                                              | 6                                    | 12              | 145                      | 156                    |
| 1TQY        | i; i+4; i+5;                                         | 6                                    | 12              | 111                      | 122                    |
| 1TUE        | i; i+4; i+5;                                         | 6                                    | 22              | 5                        | 26                     |
| 1TY4        | i; i+4; i+7; i+8;                                    | 9                                    | 11              | 50                       | 60                     |
| 1UKL        | i; i+5;                                              | 6                                    | 21              | 371                      | 391                    |
| 1UKV        | i; i+3; i+7; i+11;                                   | 12                                   | 15              | 239                      | 253                    |
| 1VCB        | i; i+3; i+8; i+11;                                   | 12                                   | 13              | 158                      | 170                    |
| 1VF6        | i; i+7;                                              | 8                                    | 13              | 157                      | 169                    |

TABLE S3

| A. PDB<br>CODE | Q. HELIX SEQUENCE                              | R. RESOLUTION |
|----------------|------------------------------------------------|---------------|
| 1LQB           | SHVLSKVCMYFTYKVRY                              | 2.00          |
| 1LUJ           | EGVATYAAAVLFRM                                 | 2.50          |
| 1M1E           | EGVATYAAAVLFRMS                                | 2.10          |
| 1M63           | VFTWSLPFVGEKVTE                                | 2.80          |
| 1MF8           | EKVTEMLNVNLN                                   | 3.10          |
| 1MXE           | FAKSKWKQAFNATAVVRHMRK                          | 1.70          |
| 1N1J           | DSYVEPLKLYLQKFR                                | 1.67          |
| 1N1J           | KDAKECVQECVSEFISFITSEASERCHQE                  | 1.67          |
| 1N1J           | AEAPVLFKAAQIFITELTLRAWIHTEDN                   | 1.67          |
| 1N2D           | SQAIKYLQNNIKGFIRQRVNDEMKNVNCATLLQAAYRGHSIRANVF | 2.00          |
| 1N4Q           | EKELNRIKRWCIM                                  | 2.40          |
| 1NGM           | EEASKLKERIWGLN                                 | 2.95          |
| 1NH2           | EQTLQDLKNIWQKKLTE                              | 1.90          |
| 1NH2           | AEASRVYEIIVESVVNEV                             | 1.90          |
| 1NH2           | TIGNSLVDALDTLISD                               | 1.90          |
| 1NU7           | KDAKDKLMTRILGEDQYLLERKKVQYEEYKLYKYYKEEN        | 2.20          |
| 1NU9           | KDAKDKLMTRILGEDQYLLERKKVQYEEYKLYKYYKEEN        | 2.20          |
| 1NVM           | EDMIVDVALDLLAAH                                | 1.70          |
| 1NX0           | AIDALSSDF                                      | 2.30          |
| 1O00           | PEGLRCFYLLVQDLKCLVFLSLIGLHF                    | 1.85          |
| 1OQP           | KRELIESKWHRLLF                                 | NOT APP       |
| 1OQS           | LFQFGEMILQKTG                                  | 1.90          |
| 1OR0           | APSAFYGYGWAQARSH                               | 2.00          |
| 1OR0           | PDFRANLDAFAAGINAYAQQN                          | 2.00          |
| 1OR0           | EQTTVWLLTN                                     | 2.00          |
| 1OR7           | ISSRVMAAIEE                                    | 2.00          |
| 1OR7           | PEMQKTWESYHLIRDSMR                             | 2.00          |
| 1OXX           | HVNQEVIKRMLNLE                                 | 2.10          |
| 1P27           | PEGLRVFYLLVQDLKCLVFLSLIGLHF                    | 2.00          |
| 1PGR           | QSFLKCLEQVRKIQGDGAALQEKLCATY                   | 3.50          |
| 1PQ1           | PEIRIAQELRRIGDEFNETYTRRVFAN                    | 1.65          |
| 1PZL           | KILHRLQEGS                                     | 2.10          |
| 1QZ7           | ESILDEHVQRVM                                   | 2.20          |
| 1R4M           | HTIAAFLGAAAQEVIKIITK                           | 3.00          |
| 1R8U           | EEVLMSLVIEMG                                   | NOT APP       |
| 1RF8           | PTFLLQFKDKLN                                   | NOT APP       |
| 1RIW           | KKWIQKVIDQ                                     | 2.04          |
| 1RK8           | PEGLRCFYLLVQDLKCLVFLSLIGLHF                    | 1.90          |
| 1RM1           | TIGNSLVDALDTLISD                               | 2.50          |
| 1RM1           | ASLAMRVLETFDKVVVAETLKDN                        | 2.50          |
| 1RP3           | DEKVVKGLIEFFT                                  | 2.30          |
| 1RP3           | EREKLVQLIFYE                                   | 2.30          |
| 1SA0           | VHWYVGEG                                       | 3.58          |
| 1SB0           | EKRIKELELLLMSTENELKGQ                          | NOT APP       |
| 1SYQ           | LLQAAKGLAGAVSELLRSAQ                           | 2.42          |
| 1TCO           | VFTWSLPFVGEKVTEMLNVNLN                         | 2.50          |
| 1TI2           | NCFMGCMEHEL                                    | 2.35          |
| 1TN6           | KEYWRYIGRSLQSKH                                | 1.80          |
| 1TQY           | FDFTHREFRKLWSEG                                | 2.00          |
| 1TQY           | PSVMPAEVAWAV                                   | 2.00          |
| 1TQY           | ATSLEREYLLS                                    | 2.00          |
| 1TUE           | KETLSERLSALQDKIIDHYEND                         | 2.10          |
| 1TY4           | IGYEIGSKLAA                                    | 2.20          |
| 1UKL           | RKAIDYIKYLQQVNHKLRQEN                          | 3.00          |
| 1UKV           | LGELPQGFARLSAIY                                | 1.50          |
| 1VCB           | LKERCLQVVRSLV                                  | 2.70          |
| 1VF6           | RDFQNAFKIHNAV                                  | 2.10          |

| A. PDB CODE | B. INTERFACE CHAINS | C. CHAIN | D. TITLE                                                                                                       |
|-------------|---------------------|----------|----------------------------------------------------------------------------------------------------------------|
| 1VG9        | G H                 | G        | THE CRYSTAL STRUCTURES OF THE REP-1 PROTEIN IN COMPLEX WITH C-TERMINALLY TRUNCATED RAE                         |
| 1VYT        | A E                 | E        | BETA3 SUBUNIT COMPLEXED WITH AID                                                                               |
| 1WA8        | AB                  | A        | SOLUTION STRUCTURE OF THE CFP-10.ESAT-6 COMPLEX. MAJOR VIRULENCE DETERMINANTS OF PATHO                         |
| 1WA8        | AB                  | B        | SOLUTION STRUCTURE OF THE CFP-10.ESAT-6 COMPLEX. MAJOR VIRULENCE DETERMINANTS OF PATHO                         |
| 1WPX        | AB                  | A        | CRYSTAL STRUCTURE OF CARBOXYPEPTIDASE Y INHIBITOR COMPLEXED WITH THE COGNATE PROTEIN                           |
| 1WPX        | AB                  | B        | CRYSTAL STRUCTURE OF CARBOXYPEPTIDASE Y INHIBITOR COMPLEXED WITH THE COGNATE PROTEIN                           |
| 1XB2        | AB                  | A        | CRYSTAL STRUCTURE OF BOS TAURUS MITOCHONDRIAL ELONGATION FACTOR TU/TS COMPLEX                                  |
| 1XB2        | AB                  | B        | CRYSTAL STRUCTURE OF BOS TAURUS MITOCHONDRIAL ELONGATION FACTOR TU/TS COMPLEX                                  |
| 1XKP        | B C                 | C        | CRYSTAL STRUCTURE OF THE VIRULENCE FACTOR YOPN IN COMPLEX WITH ITS HETERODIMERIC CHAP                          |
| 1XLS        | E M                 | M        | CRYSTAL STRUCTURE OF THE MOUSE CAR/RXR LBD HETERODIMER BOUND TO TCPOBOP AND 9CRA ANI                           |
| 1Y74        | AD                  | A        | SOLUTION STRUCTURE OF MLIN-2/MLIN-7 L27 DOMAIN COMPLEX                                                         |
| 1Y76        | CB                  | C        | SOLUTION STRUCTURE OF PATJ/PALS1 L27 DOMAIN COMPLEX                                                            |
| 1YDI        | AB                  | B        | HUMAN VINCULIN HEAD DOMAIN (VH1, 1-258) IN COMPLEX WITH HUMAN ALPHA-ACTININ'S VINCULIN-I                       |
| 1YFN        | DH                  | H        | VERSATILE MODES OF PEPTIDE RECOGNITION BY THE AAA+ ADAPTOR PROTEIN SSPB- THE CRYSTAL STI                       |
| 1YKE        | CD                  | D        | STRUCTURE OF THE MEDIATOR MED7/MED21 SUBCOMPLEX                                                                |
| 1YOV        | AB                  | A        | INSIGHTS INTO THE UBIQUITIN TRANSFER CASCADE FROM THE REFINED STRUCTURE OF THE ACTIVATI                        |
| 1Z8U        | CD                  | C        | CRYSTAL STRUCTURE OF OXIDIZED ALPHA HEMOGLOBIN BOUND TO AHSP                                                   |
| 1ZDT        | AP                  | P        | THE CRYSTAL STRUCTURE OF HUMAN STEROIDOGENIC FACTOR-1                                                          |
| 1ZL8        | AB                  | A        | NMR STRUCTURE OF L27 HETERODIMER FROM C. ELEGANS LIN-7 AND H. SAPIENS LIN-2 SCAFFOLD PRO                       |
| 1ZUN        | AB                  | A        | CRYSTAL STRUCTURE OF A GTP-REGULATED ATP SULFURYLASE HETERODIMER FROM PSEUDOMONAS S                            |
| 1ZUZ        | AB                  | B        | CALMODULIN IN COMPLEX WITH A MUTANT PEPTIDE FROM HUMAN DRP- 1 KINASE                                           |
| 1ZW3        | AB                  | B        | VINCULIN HEAD (0-258) IN COMPLEX WITH THE TALIN ROD RESIDUES 1630-1652                                         |
| 2A6Q        | AE                  | A        | CRYSTAL STRUCTURE OF YEFM-YOEB COMPLEX                                                                         |
| 2A6Q        | AE                  | A        | CRYSTAL STRUCTURE OF YEFM-YOEB COMPLEX                                                                         |
| 2A6Q        | CF                  | F        | CRYSTAL STRUCTURE OF YEFM-YOEB COMPLEX                                                                         |
| 2AFF        | AB                  | B        | THE SOLUTION STRUCTURE OF THE KI67FHA/HNIFK(226-269)3P COMPLEX                                                 |
| 2AST        | BC                  | C        | CRYSTAL STRUCTURE OF SKP1-SKP2-CKS1 IN COMPLEX WITH A P27 PEPTIDE                                              |
| 2AVU        | BE                  | E        | STRUCTURE OF THE ESCHERICHIA COLI FLHDC COMPLEX, A PROKARYOTIC HETEROMERIC REGULATOR                           |
| 2B87        | AB                  | A        | STRUCTURAL BASIS FOR MOLECULAR RECOGNITION IN AN AFFIBODY:AFFIBODY COMPLEX                                     |
| 2B9S        | AB                  | B        | CRYSTAL STRUCTURE OF HETERODIMERIC L. DONOVANI TOPOISOMERASE I-VANADATE-DNA COMPLEX                            |
| 2BCX        | AB                  | B        | CRYSTAL STRUCTURE OF CALMODULIN IN COMPLEX WITH A RYANODINE RECEPTOR PEPTIDE                                   |
| 2BE6        | BE                  | E        | 2.0 Å CRYSTAL STRUCTURE OF THE CAV1.2 IQ DOMAIN-CA/CAM COMPLEX                                                 |
| 2BGN        | BE                  | E        | HIV-1 TAT PROTEIN DERIVED N-TERMINAL NONAPEPTIDE TRP2-TAT (1-9) BOUND TO THE ACTIVE SITE OF                    |
| 2BNQ        | AE                  | A        | STRUCTURAL AND KINETIC BASIS FOR HEIGHTENED IMMUNOGENICITY OF T CELL VACCINES                                  |
| 2BYK        | DC                  | D        | HISTONE FOLD HETERODIMER OF THE CHROMATIN ACCESSIBILITY COMPLEX                                                |
| 2BYK        | DC                  | D        | HISTONE FOLD HETERODIMER OF THE CHROMATIN ACCESSIBILITY COMPLEX                                                |
| 2BZW        | AB                  | B        | THE CRYSTAL STRUCTURE OF BCL-XL IN COMPLEX WITH FULL-LENGTH BAD                                                |
| 2C2V        | BC                  | C        | CRYSTAL STRUCTURE OF THE CHIP-UBC13-UEV1A COMPLEX                                                              |
| 2C5I        | TP                  | P        | N-TERMINAL DOMAIN OF TLG1 COMPLEXED WITH N-TERMINUS OF VPS51 IN DISTORTED CONFORMATIO                          |
| 2C9W        | BC                  | C        | CRYSTAL STRUCTURE OF SOCS-2 IN COMPLEX WITH ELONGIN-B AND ELONGIN-C AT 1.9Å RESOLUTION                         |
| 2CJS        | AC                  | A        | STRUCTURAL BASIS FOR A MUNC13-1 DIMERIC - MUNC13-1 - RIM HETERODIMER SWITCH: C2-DOMAINS /                      |
| 2D10        | AE                  | E        | CRYSTAL STRUCTURE OF THE RADIXIN FERM DOMAIN COMPLEXED WITH THE NHERF-1 C-TERMINAL TA                          |
| 2D1P        | GI                  | I        | CRYSTAL STRUCTURE OF HETEROHEXAMERIC TUSBCD PROTEINS, WHICH ARE CRUCIAL FOR THE TRNA                           |
| 2D7D        | AB                  | A        | STRUCTURAL INSIGHTS INTO THE CRYPTIC DNA DEPENDENT ATP-ASE ACTIVITY OF UVRB                                    |
| 2D7D        | AB                  | B        | STRUCTURAL INSIGHTS INTO THE CRYPTIC DNA DEPENDENT ATP-ASE ACTIVITY OF UVRB                                    |
| 2DOI        | XC                  | C        | THE X-RAY CRYSTALLOGRAPHIC STRUCTURE OF THE ANGIOGENESIS INHIBITOR, ANGIOSTATIN, BOUND                         |
| 2DOQ        | AD                  | D        | CRYSTAL STRUCTURE OF SFI1P/CDC31P COMPLEX                                                                      |
| 2DOQ        | BD                  | D        | CRYSTAL STRUCTURE OF SFI1P/CDC31P COMPLEX                                                                      |
| 2DSR        | BI                  | I        | STRUCTURAL BASIS FOR THE INHIBITION OF INSULIN-LIKE GROWTH FACTORS BY IGF BINDING PROTEIN                      |
| 2DYM        | EF                  | F        | THE CRYSTAL STRUCTURE OF SACCHAROMYCES CEREVISIAE ATG5- ATG16(1-46) COMPLEX                                    |
| 2E30        | AB                  | B        | SOLUTION STRUCTURE OF THE CYTOPLASMIC REGION OF NA <sup>+</sup> /H <sup>+</sup> EXCHANGER 1 COMPLEXED WITH ES: |
| 2E9X        | AC                  | A        | THE CRYSTAL STRUCTURE OF HUMAN GINS CORE COMPLEX                                                               |
| 2E9X        | AD                  | A        | THE CRYSTAL STRUCTURE OF HUMAN GINS CORE COMPLEX                                                               |
| 2E9X        | AD                  | D        | THE CRYSTAL STRUCTURE OF HUMAN GINS CORE COMPLEX                                                               |
| 2E9X        | AD                  | D        | THE CRYSTAL STRUCTURE OF HUMAN GINS CORE COMPLEX                                                               |
| 2E9X        | BC                  | B        | THE CRYSTAL STRUCTURE OF HUMAN GINS CORE COMPLEX                                                               |
| 2E9X        | BC                  | C        | THE CRYSTAL STRUCTURE OF HUMAN GINS CORE COMPLEX                                                               |

TABLE S3

Jochim, et al

| A. PDB<br>CODE | E. FUNCTION                             | F. $\Delta\Delta G_{\text{AVG,HELIX}}$<br>(KCAL/MOL) | G. $\Delta\Delta G_{\text{SUM,HELIX}}$<br>(KCAL/MOL) | H. $\Delta\Delta G_{\text{SUM,CHAIN}}$<br>(KCAL/MOL) | I. HELIX<br>CONTRIBUTION |
|----------------|-----------------------------------------|------------------------------------------------------|------------------------------------------------------|------------------------------------------------------|--------------------------|
| 1VG9           | PROTEIN BINDING/PROTEIN TRANSPORT       | 2.2                                                  | 6.6                                                  | 10.1                                                 | 65%                      |
| 1VYT           | TRANSPORT PROTEIN                       | 2.9                                                  | 14.5                                                 | 14.5                                                 | 100%                     |
| 1WA8           | TUBERCULOSIS                            | 4.2                                                  | 12.6                                                 | 29.6                                                 | 43%                      |
| 1WA8           | TUBERCULOSIS                            | 4.4                                                  | 8.7                                                  | 13.6                                                 | 64%                      |
| 1WPX           | HYDROLASE                               | 2.4                                                  | 4.7                                                  | 16.8                                                 | 28%                      |
| 1WPX           | HYDROLASE                               | 2.6                                                  | 5.2                                                  | 20.3                                                 | 26%                      |
| 1XB2           | TRANSLATION                             | 2.2                                                  | 6.7                                                  | 10.7                                                 | 63%                      |
| 1XB2           | TRANSLATION                             | 2.5                                                  | 5.0                                                  | 23.0                                                 | 22%                      |
| 1XKP           | MEMBRANE PROTEIN/CHAPERON               | 2.1                                                  | 8.5                                                  | 12.2                                                 | 70%                      |
| 1XLS           | TRANSCRIPTION                           | 2.1                                                  | 6.2                                                  | 9.1                                                  | 68%                      |
| 1Y74           | TRANSPORT PROTEIN                       | 4.7                                                  | 14.2                                                 | 18.8                                                 | 76%                      |
| 1Y76           | TRANSPORT PROTEIN                       | 5.9                                                  | 17.7                                                 | 24.0                                                 | 74%                      |
| 1YDI           | CELL ADHESION, STRUCTURAL PROTEIN       | 2.4                                                  | 16.6                                                 | 16.6                                                 | 100%                     |
| 1YFN           | PROTEIN BINDING                         | 2.4                                                  | 4.7                                                  | 11.7                                                 | 40%                      |
| 1YKE           | GENE REGULATION                         | 2.9                                                  | 8.7                                                  | 11.9                                                 | 73%                      |
| 1YOV           | SIGNALING PROTEIN                       | 2.0                                                  | 6.1                                                  | 32.9                                                 | 19%                      |
| 1Z8U           | ELECTRON TRANSPORT                      | 2.0                                                  | 8.0                                                  | 8.0                                                  | 100%                     |
| 1ZDT           | TRANSCRIPTION                           | 2.0                                                  | 8.1                                                  | 8.1                                                  | 100%                     |
| 1ZL8           | PROTEIN BINDING                         | 2.2                                                  | 4.3                                                  | 25.2                                                 | 17%                      |
| 1ZUN           | TRANSFERASE                             | 2.0                                                  | 6.0                                                  | 14.8                                                 | 41%                      |
| 1ZUZ           | METAL BINDING PROTEIN/TRANSFERASE       | 2.6                                                  | 21.1                                                 | 22.7                                                 | 93%                      |
| 1ZW3           | PROTEIN BINDING                         | 2.2                                                  | 8.6                                                  | 10.0                                                 | 86%                      |
| 2A6Q           | TOXIN INHIBITOR/TOXIN                   | 2.1                                                  | 8.5                                                  | 15.0                                                 | 57%                      |
| 2A6Q           | TOXIN INHIBITOR/TOXIN                   | 2.4                                                  | 9.5                                                  | 15.0                                                 | 63%                      |
| 2A6Q           | TOXIN INHIBITOR/TOXIN                   | 2.2                                                  | 6.7                                                  | 22.9                                                 | 29%                      |
| 2AFF           | CELL CYCLE                              | 3.0                                                  | 11.9                                                 | 11.9                                                 | 100%                     |
| 2AST           | CELL CYCLE/LIGASE/PROTEIN TURNOVER      | 2.6                                                  | 12.9                                                 | 18.6                                                 | 69%                      |
| 2AVU           | TRANSCRIPTION ACTIVATOR                 | 2.8                                                  | 5.5                                                  | 8.4                                                  | 65%                      |
| 2B87           | PROTEIN BINDING                         | 2.3                                                  | 7.0                                                  | 11.1                                                 | 63%                      |
| 2B9S           | ISOMERASE/DNA                           | 2.0                                                  | 8.1                                                  | 28.1                                                 | 29%                      |
| 2BCX           | CALCIUM BINDING PROTEIN                 | 2.2                                                  | 15.1                                                 | 15.1                                                 | 100%                     |
| 2BE6           | MEMBRANE PROTEIN                        | 2.1                                                  | 14.9                                                 | 14.9                                                 | 100%                     |
| 2BGN           | HYDROLASE                               | 2.3                                                  | 6.8                                                  | 15.1                                                 | 45%                      |
| 2BNQ           | IMMUNE SYSTEM/RECEPTOR                  | 2.2                                                  | 6.6                                                  | 6.6                                                  | 100%                     |
| 2BYK           | DNA-BINDING PROTEIN                     | 2.5                                                  | 10.1                                                 | 26.1                                                 | 39%                      |
| 2BYK           | DNA-BINDING PROTEIN                     | 2.7                                                  | 5.4                                                  | 26.1                                                 | 21%                      |
| 2BZW           | TRANSCRIPTION                           | 2.4                                                  | 12.2                                                 | 18.3                                                 | 67%                      |
| 2C2V           | CHAPERONE                               | 5.5                                                  | 16.4                                                 | 16.4                                                 | 100%                     |
| 2C5I           | PROTEIN TRANSPORT                       | 2.1                                                  | 6.4                                                  | 9.4                                                  | 68%                      |
| 2C9W           | TRANSCRIPTION REGULATION                | 2.4                                                  | 4.7                                                  | 12.0                                                 | 39%                      |
| 2CJS           | EXOCYTOSIS                              | 2.1                                                  | 6.2                                                  | 11.6                                                 | 53%                      |
| 2D10           | CELL ADHESION                           | 2.9                                                  | 8.6                                                  | 9.9                                                  | 87%                      |
| 2D1P           | TRANSLATION                             | 2.6                                                  | 15.5                                                 | 15.5                                                 | 100%                     |
| 2D7D           | HYDROLASE/DNA                           | 2.5                                                  | 7.6                                                  | 12.7                                                 | 60%                      |
| 2D7D           | HYDROLASE/DNA                           | 3.1                                                  | 9.3                                                  | 10.5                                                 | 89%                      |
| 2DOI           | HYDROLASE                               | 2.0                                                  | 6.1                                                  | 6.1                                                  | 100%                     |
| 2DOQ           | CELL CYCLE                              | 2.5                                                  | 7.6                                                  | 7.6                                                  | 100%                     |
| 2DOQ           | CELL CYCLE                              | 3.4                                                  | 13.7                                                 | 13.7                                                 | 100%                     |
| 2DSR           | PROTEIN BINDING/HORMONE/GROWTH FACTOR   | 2.4                                                  | 4.7                                                  | 8.0                                                  | 59%                      |
| 2DYM           | PROTEIN TURNOVER/PROTEIN TURNOVER       | 2.2                                                  | 13.0                                                 | 25.8                                                 | 50%                      |
| 2E30           | METAL BINDING PROTEIN/TRANSPORT PROTEIN | 2.6                                                  | 7.7                                                  | 9.2                                                  | 84%                      |
| 2E9X           | REPLICATION                             | 2.0                                                  | 8.0                                                  | 13.1                                                 | 61%                      |
| 2E9X           | REPLICATION                             | 2.2                                                  | 4.3                                                  | 15.1                                                 | 28%                      |
| 2E9X           | REPLICATION                             | 2.6                                                  | 10.4                                                 | 21.8                                                 | 48%                      |
| 2E9X           | REPLICATION                             | 2.5                                                  | 7.4                                                  | 21.8                                                 | 34%                      |
| 2E9X           | REPLICATION                             | 2.1                                                  | 4.1                                                  | 27.3                                                 | 15%                      |
| 2E9X           | REPLICATION                             | 2.4                                                  | 14.2                                                 | 32.0                                                 | 44%                      |

TABLE S3

| A. PDB CODE | J. # HOTSPOT RESIDUES | K. HOTSPOT RESIDUES, RESIDUE #, $\Delta\Delta G$ (KCAL/MOL)                             |
|-------------|-----------------------|-----------------------------------------------------------------------------------------|
| 1VG9        | 3                     | Q382, 1.0; R386, 3.0; V390, 2.6;                                                        |
| 1VYT        | 5                     | L430, 1.0; L434, 1.1; Y437, 4.8; W440, 5.9; I441, 1.7;                                  |
| 1WA8        | 3                     | F17, 1.9; D23, 1.0; L24, 9.7;                                                           |
| 1WA8        | 2                     | I625, 7.5; L636, 1.2;                                                                   |
| 1WPX        | 2                     | W231, 3.5; Y239, 1.2;                                                                   |
| 1WPX        | 2                     | F507, 4.0; S514, 1.2;                                                                   |
| 1XB2        | 3                     | E193, 2.6; L194, 1.7; E198, 2.4;                                                        |
| 1XB2        | 2                     | K60, 1.4; R67, 3.6;                                                                     |
| 1XKP        | 4                     | R66, 1.6; M69, 2.9; Q70, 1.3; L73, 2.7;                                                 |
| 1XLS        | 3                     | L744, 1.4; L745, 2.9; L749, 1.9;                                                        |
| 1Y74        | 3                     | L19, 1.8; D22, 5.2; L33, 7.2;                                                           |
| 1Y76        | 3                     | L35, 3.7; F38, 11.8; L42, 2.2;                                                          |
| 1YDI        | 7                     | W743, 5.8; L746, 1.5; L747, 2.6; I750, 1.8; I754, 1.7; E758, 1.2; I761, 2.0;            |
| 1YFN        | 2                     | P6, 1.1; K11, 3.6;                                                                      |
| 1YKE        | 3                     | M15, 2.6; F19, 4.4; L23, 1.7;                                                           |
| 1YOV        | 3                     | Y478, 1.2; E481, 1.3; R484, 3.6;                                                        |
| 1Z8U        | 4                     | D43, 1.7; F47, 2.8; Y48, 1.0; Y51, 2.5;                                                 |
| 1ZDT        | 4                     | L744, 1.9; L745, 2.8; L748, 1.2; L749, 2.2;                                             |
| 1ZL8        | 2                     | L5, 1.6; L15, 2.7;                                                                      |
| 1ZUN        | 3                     | L11, 2.9; R20, 1.6; H7, 1.5;                                                            |
| 1ZUZ        | 8                     | R304, 1.9; W305, 6.6; L307, 1.6; F309, 3.2; V312, 2.2; L314, 1.6; H317, 2.3; L318, 1.7; |
| 1ZW3        | 4                     | L1633, 1.6; V1640, 1.6; L1647, 3.2; I1648, 2.2;                                         |
| 2A6Q        | 4                     | E53, 1.0; E59, 2.9; Y62, 2.6; L63, 2.0;                                                 |
| 2A6Q        | 4                     | N69, 1.4; R72, 2.9; L73, 1.8; L80, 3.4;                                                 |
| 2A6Q        | 3                     | W10, 2.5; Y13, 2.2; E8, 2.0;                                                            |
| 2AFF        | 4                     | F241, 1.8; L242, 3.9; R245, 2.8; V249, 3.4;                                             |
| 2AST        | 5                     | E3040, 2.1; S3041, 1.4; E3042, 6.5; R3044, 1.7; N3045, 1.2;                             |
| 2AVU        | 2                     | V71, 2.1; F82, 3.4;                                                                     |
| 2B87        | 3                     | W11, 1.2; W14, 3.5; F17, 2.3;                                                           |
| 2B9S        | 4                     | R226, 2.1; I227, 1.6; I228, 1.0; W231, 3.4;                                             |
| 2BCX        | 7                     | L3623, 2.3; K3626, 1.0; R3628, 2.7; R3629, 1.6; V3632, 1.5; V3633, 1.8; F3636, 4.2;     |
| 2BE6        | 7                     | T1614, 1.3; K1617, 1.5; F1618, 4.5; Y1619, 1.6; F1622, 2.6; L1623, 1.0; I1624, 2.4;     |
| 2BGN        | 3                     | L132, 2.1; Q135, 2.4; E139, 2.3;                                                        |
| 2BNQ        | 3                     | R65, 1.7; Q72, 3.3; T73, 1.6;                                                           |
| 2BYK        | 4                     | F81, 3.6; L85, 2.1; L89, 1.1; Y92, 3.3;                                                 |
| 2BYK        | 2                     | I37, 1.9; F44, 3.5;                                                                     |
| 2BZW        | 5                     | Y105, 2.8; L109, 2.5; D114, 2.0; F116, 3.7; E117, 1.2;                                  |
| 2C2V        | 3                     | F42, 1.8; L45, 13.1; L48, 1.5;                                                          |
| 2C5I        | 3                     | R20, 2.3; L23, 2.5; F27, 1.6;                                                           |
| 2C9W        | 2                     | H68, 3.6; R82, 1.1;                                                                     |
| 2CJS        | 3                     | E137, 2.1; W141, 2.4; L145, 1.7;                                                        |
| 2D10        | 3                     | W348, 2.8; K351, 1.7; F355, 4.1;                                                        |
| 2D1P        | 6                     | Y79, 3.5; T80, 1.4; F82, 3.7; V83, 3.3; R84, 1.3; V87, 2.3;                             |
| 2D7D        | 3                     | F644, 3.7; E645, 1.6; R651, 2.3;                                                        |
| 2D7D        | 3                     | F644, 4.0; E645, 1.5; R651, 3.8;                                                        |
| 2DOI        | 3                     | L310, 3.1; K314, 1.9; H318, 1.1;                                                        |
| 2DOQ        | 3                     | F237, 2.3; W240, 3.8; L245, 1.5;                                                        |
| 2DOQ        | 4                     | F258, 3.2; L264, 2.6; F268, 2.2; W271, 5.7;                                             |
| 2DSR        | 2                     | E9, 1.4; F16, 3.3;                                                                      |
| 2DYM        | 6                     | L28, 1.8; I29, 1.5; R31, 1.8; L32, 2.6; R35, 3.9; E39, 1.4;                             |
| 2E30        | 3                     | I522, 5.5; H523, 1.0; E535, 1.2;                                                        |
| 2E9X        | 4                     | R71, 3.3; R74, 1.9; Y81, 1.3; R86, 1.5;                                                 |
| 2E9X        | 2                     | W113, 2.2; Y124, 2.1;                                                                   |
| 2E9X        | 4                     | F129, 3.3; F133, 2.8; Y140, 3.1; L141, 1.2;                                             |
| 2E9X        | 3                     | Y87, 3.4; R94, 2.5; L97, 1.5;                                                           |
| 2E9X        | 2                     | W121, 1.9; R129, 2.2;                                                                   |
| 2E9X        | 6                     | M1171, 1.3; L1175, 3.6; K1181, 1.2; D1185, 1.3; F1186, 2.8; W1189, 4.0;                 |

TABLE S3

Jochim, et al

| A. PDB CODE | L. HOTSPOT RESIDUE HELIX POSITIONS       | M. HOTSPOT RESIDUE END TO END LENGTH | N. HELIX LENGTH | O. HELIX START RESIDUE # | P. HELIX END RESIDUE # |
|-------------|------------------------------------------|--------------------------------------|-----------------|--------------------------|------------------------|
| 1VG9        | i; i+4; i+8;                             | 9                                    | 15              | 377                      | 391                    |
| 1VYT        | i; i+4; i+7; i+10; i+11;                 | 12                                   | 22              | 424                      | 445                    |
| 1WA8        | i; i+6; i+7;                             | 8                                    | 34              | 7                        | 40                     |
| 1WA8        | i; i+11;                                 | 12                                   | 34              | 610                      | 643                    |
| 1WPX        | i; i+8;                                  | 9                                    | 22              | 230                      | 251                    |
| 1WPX        | i; i+7;                                  | 8                                    | 12              | 507                      | 518                    |
| 1XB2        | i; i+1; i+5;                             | 6                                    | 14              | 193                      | 206                    |
| 1XB2        | i; i+7;                                  | 8                                    | 15              | 57                       | 71                     |
| 1XKP        | i; i+3; i+4; i+7;                        | 8                                    | 14              | 62                       | 75                     |
| 1XLS        | i; i+1; i+5;                             | 6                                    | 9               | 743                      | 751                    |
| 1Y74        | i; i+3; i+14;                            | 15                                   | 19              | 19                       | 37                     |
| 1Y76        | i; i+3; i+7;                             | 8                                    | 15              | 30                       | 44                     |
| 1YDI        | i; i+3; i+4; i+7; i+11; i+15; i+18;      | 19                                   | 22              | 743                      | 764                    |
| 1YFN        | i; i+5;                                  | 6                                    | 6               | 6                        | 11                     |
| 1YKE        | i; i+4; i+8;                             | 9                                    | 22              | 4                        | 25                     |
| 1YOV        | i; i+3; i+6;                             | 7                                    | 11              | 476                      | 486                    |
| 1Z8U        | i; i+4; i+5; i+8;                        | 9                                    | 21              | 34                       | 54                     |
| 1ZDT        | i; i+1; i+4; i+5;                        | 6                                    | 9               | 743                      | 751                    |
| 1ZL8        | i; i+10;                                 | 11                                   | 17              | 4                        | 20                     |
| 1ZUN        | i; i+4; i+13;                            | 14                                   | 20              | 7                        | 26                     |
| 1ZUZ        | i; i+1; i+3; i+5; i+8; i+10; i+13; i+14; | 14                                   | 16              | 304                      | 319                    |
| 1ZW3        | i; i+7; 15; 16;                          | 16                                   | 19              | 1631                     | 1649                   |
| 2A6Q        | i; i+6; i+9; i+10;                       | 11                                   | 16              | 51                       | 66                     |
| 2A6Q        | i; i+3; i+4; i+11;                       | 12                                   | 16              | 67                       | 82                     |
| 2A6Q        | i; i+2; i+5;                             | 6                                    | 12              | 7                        | 18                     |
| 2AFF        | i; i+1; i+4; i+8;                        | 9                                    | 14              | 239                      | 252                    |
| 2AST        | i; i+1; i+2; i+4; i+5;                   | 7                                    | 8               | 3040                     | 3047                   |
| 2AVU        | i; i+11;                                 | 12                                   | 20              | 67                       | 86                     |
| 2B87        | i; i+3; i+6;                             | 7                                    | 15              | 4                        | 18                     |
| 2B9S        | i; i+1; i+2; i+5;                        | 6                                    | 10              | 225                      | 234                    |
| 2BCX        | i; i+3; i+5; i+6; 10; 11; 14;            | 14                                   | 23              | 3617                     | 3639                   |
| 2BE6        | i; i+3; i+4; i+5; i+8; 10; 11;           | 11                                   | 13              | 1613                     | 1625                   |
| 2BGN        | i; i+3; i+7;                             | 8                                    | 19              | 126                      | 144                    |
| 2BNQ        | i; i+7; i+8;                             | 9                                    | 29              | 57                       | 85                     |
| 2BYK        | i; i+4; i+8; i+11;                       | 12                                   | 19              | 79                       | 97                     |
| 2BYK        | i; i+7;                                  | 8                                    | 29              | 31                       | 59                     |
| 2BZW        | i; i+4; i+9; i+11; i+12;                 | 13                                   | 20              | 100                      | 119                    |
| 2C2V        | i; i+3; i+6;                             | 7                                    | 14              | 40                       | 53                     |
| 2C5I        | i; i+3; i+7;                             | 8                                    | 14              | 16                       | 29                     |
| 2C9W        | i; i+14;                                 | 15                                   | 17              | 67                       | 83                     |
| 2CJS        | i; i+4; i+8;                             | 9                                    | 20              | 135                      | 154                    |
| 2D10        | i; i+3; i+7;                             | 8                                    | 10              | 348                      | 357                    |
| 2D1P        | i; i+1; i+3; i+4; i+5; i+8;              | 9                                    | 11              | 79                       | 89                     |
| 2D7D        | i; i+1; i+7;                             | 8                                    | 11              | 644                      | 654                    |
| 2D7D        | i; i+1; i+7;                             | 8                                    | 16              | 644                      | 659                    |
| 2DOI        | i; i+4; i+8;                             | 9                                    | 20              | 307                      | 326                    |
| 2DOQ        | i; i+3; i+8;                             | 9                                    | 26              | 224                      | 249                    |
| 2DOQ        | i; i+6; i+10; i+13;                      | 14                                   | 41              | 252                      | 292                    |
| 2DSR        | i; i+7;                                  | 8                                    | 12              | 8                        | 19                     |
| 2DYM        | i; i+1; i+3; i+4; i+7; i+11;             | 12                                   | 18              | 24                       | 41                     |
| 2E30        | i; i+1; i+13;                            | 14                                   | 21              | 518                      | 538                    |
| 2E9X        | i; i+3; i+10; i+15;                      | 16                                   | 37              | 58                       | 94                     |
| 2E9X        | i; i+11;                                 | 12                                   | 22              | 108                      | 129                    |
| 2E9X        | i; i+4; i+11; i+12;                      | 13                                   | 24              | 124                      | 147                    |
| 2E9X        | i; i+7; i+10;                            | 11                                   | 32              | 72                       | 103                    |
| 2E9X        | i; i+8;                                  | 9                                    | 29              | 110                      | 138                    |
| 2E9X        | i; i+4; 11; 15; 16; 19;                  | 19                                   | 22              | 1170                     | 1191                   |

TABLE S3

| A. PDB<br>CODE | Q. HELIX SEQUENCE                         | R. RESOLUTION |
|----------------|-------------------------------------------|---------------|
| 1VG9           | QGELPQCFCRMCAVF                           | 2.50          |
| 1VYT           | LREKQQLEEDLKG YLDWITQAE                   | 2.60          |
| 1WA8           | AATLAQEAGNFERISGDLKTQIDQVESTAGSLQG        | NOT APP       |
| 1WA8           | GIEAAASAIQGNVTSIHSLLDEGKQSLTKLAAAW        | NOT APP       |
| 1WPX           | VWSCVPATYICNNAQLAPYQRT                    | 2.70          |
| 1WPX           | FAQASIDSYKKH                              | 2.70          |
| 1XB2           | ELVELEIRELLTEF                            | 2.20          |
| 1XB2           | ASSKELLMKLRRTG                            | 2.20          |
| 1XKP           | VTLLRSLMQALAW                             | 1.70          |
| 1XLS           | ALLRYLLDK                                 | 2.96          |
| 1Y74           | LERDVSRAVELLERLQRSG                       | NOT APP       |
| 1Y76           | TQNEKLSAFYETLKS                           | NOT APP       |
| 1YDI           | WEQLLTTIARTINEVENQILTR                    | 1.80          |
| 1YFN           | PHQWQK                                    | 1.80          |
| 1YKE           | RLTQLQICLDQMTEQFCATLNY                    | 3.30          |
| 1YOV           | DDYVHEFCRYG                               | 2.60          |
| 1Z8U           | EEDMVTVVEDWMNFYINYYRQ                     | 2.40          |
| 1ZDT           | ALLRYLLDK                                 | 2.10          |
| 1ZL8           | NLERDVQRILELMEHVQ                         | NOT APP       |
| 1ZUN           | HLKQLEAESIHIREVAAEF                       | 2.70          |
| 1ZUZ           | RWKLDFSIVSLCNHLT                          | 1.91          |
| 1ZW3           | SVLAGHSRTVSDSIKLLIT                       | 3.30          |
| 2A6Q           | LEEYNSLEETAYLLRS                          | 2.05          |
| 2A6Q           | PANARRLMDSIDSLKS                          | 2.05          |
| 2A6Q           | EESWDDYLYWQE                              | 2.05          |
| 2AFF           | PTFLERRKSQVAEL                            | NOT APP       |
| 2AST           | ESEWRNLG                                  | 2.30          |
| 2AVU           | WEQNVHASMFCAWQFLLKT                       | 3.00          |
| 2B87           | KFNKELGWATWEIFN                           | NOT APP       |
| 2B9S           | PRHCSWAKA                                 | 2.27          |
| 2BCX           | KAVWHKLLSKQRRRAVVACFRMT                   | 2.00          |
| 2BE6           | VTVGKFYATFLIQ                             | 2.00          |
| 2BGN           | PDEVVSLVNQGLQEGERDF                       | 3.15          |
| 2BNQ           | PEYWDGETRKKVKAHSQTHRVDLGTLRGYY            | 1.70          |
| 2BYK           | ESFVPSLTQDLEVYRKVVK                       | 2.40          |
| 2BYK           | KEARAAIARAASVFAIFVTSSTALAHKQ              | 2.40          |
| 2BZW           | WAAQRYGRELRRMSDEFEGS                      | 2.30          |
| 2C2V           | RNFRLLEELEEGQK                            | 2.90          |
| 2C5I           | LNKDRRLLREFYN                             | 2.30          |
| 2C9W           | SHVLSKVCMYFTYKVRY                         | 1.90          |
| 2CJS           | EEEARYWAKKLEQLNAKLNS                      | 1.78          |
| 2D10           | WSKKNELFSN                                | 2.50          |
| 2D1P           | YTDFVRLTVKH                               | 2.15          |
| 2D7D           | FERAAELRDLL                               | 2.10          |
| 2D7D           | FERAAELRDLLLELKA                          | 2.10          |
| 2DOI           | DAELQRLKNERHEEAELERL                      | 3.10          |
| 2DOQ           | FANQAKLRVQEAIFYIWSDKTLKYSQ                | 3.00          |
| 2DOQ           | NDEAESFRNTWLLFRSFQQWITLTQTFKEQSRLADQAFLNK | 3.00          |
| 2DSR           | AELVDALQFVCG                              | 2.10          |
| 2DYM           | MDDLIRRLTDRNDKEAH                         | 2.20          |
| 2E30           | INEEHTQFLDHLLTGIEDIC                      | NOT APP       |
| 2E9X           | LIPTIKFRHCSSLRNRRTVAYLYDRLLRIRALRWEY      | 2.30          |
| 2E9X           | AEEMEFNFKRSLATYMRSLG                      | 2.30          |
| 2E9X           | PEELAFAREFMANTESYLKNVALK                  | 2.30          |
| 2E9X           | DLKVSIIHQMEMERIRYVLSYLRCRLMKIEKF          | 2.30          |
| 2E9X           | ADEIRTLVKDMWDTRIAKLRVSADSFVRQ             | 2.30          |
| 2E9X           | EMERGLFQTGQKGLNDFQCWEK                    | 2.30          |



TABLE S3

Jochim, et al

| A. PDB CODE | B. INTERFACE CHAINS | C. CHAIN | D. TITLE                                                                                  |
|-------------|---------------------|----------|-------------------------------------------------------------------------------------------|
| 2E9X        | F G                 | G        | THE CRYSTAL STRUCTURE OF HUMAN GINS CORE COMPLEX                                          |
| 2E9X        | F G                 | G        | THE CRYSTAL STRUCTURE OF HUMAN GINS CORE COMPLEX                                          |
| 2EFC        | AB                  | A        | ARA7-GDP/ATVPS9A                                                                          |
| 2EHB        | AD                  | A        | THE STRUCTURE OF THE C-TERMINAL DOMAIN OF THE PROTEIN KINASE ATOS2 BOUND TO THE CALCIUM   |
| 2EHO        | BD                  | B        | CRYSTAL STRUCTURE OF HUMAN GINS COMPLEX                                                   |
| 2EHO        | EF                  | E        | CRYSTAL STRUCTURE OF HUMAN GINS COMPLEX                                                   |
| 2EHO        | JL                  | L        | CRYSTAL STRUCTURE OF HUMAN GINS COMPLEX                                                   |
| 2EQB        | AB                  | B        | CRYSTAL STRUCTURE OF THE RAB GTPASE SEC4P, THE SEC2P GEF DOMAIN, AND PHOSPHATE COMPLEX    |
| 2ES4        | AD                  | D        | CRYSTAL STRUCTURE OF THE BURKHOLDERIA GLUMAE LIPASE- SPECIFIC FOLDASE IN COMPLEX WITH     |
| 2EY4        | AE                  | E        | CRYSTAL STRUCTURE OF A CBF5-NOP10-GAR1 COMPLEX                                            |
| 2F66        | AB                  | A        | STRUCTURE OF THE ESCRT-I ENDOSOMAL TRAFFICKING COMPLEX                                    |
| 2F66        | AC                  | A        | STRUCTURE OF THE ESCRT-I ENDOSOMAL TRAFFICKING COMPLEX                                    |
| 2F66        | AC                  | C        | STRUCTURE OF THE ESCRT-I ENDOSOMAL TRAFFICKING COMPLEX                                    |
| 2FK0        | QR                  | R        | CRYSTAL STRUCTURE OF A H5N1 INFLUENZA VIRUS HEMAGGLUTININ.                                |
| 2FO1        | AD                  | D        | CRYSTAL STRUCTURE OF THE CSL-NOTCH-MASTERMIND TERNARY COMPLEX BOUND TO DNA                |
| 2FOT        | AC                  | C        | CRYSTAL STRUCTURE OF THE COMPLEX BETWEEN CALMODULIN AND ALPHAII-SPECTRIN                  |
| 2FUG        | AC                  | C        | CRYSTAL STRUCTURE OF THE HYDROPHILIC DOMAIN OF RESPIRATORY COMPLEX I FROM THERMUS TH      |
| 2G38        | AB                  | B        | A PE/PPE PROTEIN COMPLEX FROM MYCOBACTERIUM TUBERCULOSIS                                  |
| 2G38        | AB                  | B        | A PE/PPE PROTEIN COMPLEX FROM MYCOBACTERIUM TUBERCULOSIS                                  |
| 2GGM        | AC                  | C        | HUMAN CENTRIN 2 XERODERMA PIGMENTOSUM GROUP C PROTEIN COMPLEX                             |
| 2GL7        | DE                  | E        | CRYSTAL STRUCTURE OF A BETA-CATENIN/BCL9/TCF4 COMPLEX                                     |
| 2GMI        | AB                  | B        | MMS2/UBC13-UBIQUITIN                                                                      |
| 2GOX        | CD                  | D        | CRYSTAL STRUCTURE OF EFB-C / C3D COMPLEX                                                  |
| 2HQW        | AB                  | B        | CRYSTAL STRUCTURE OF CA2+/CALMODULIN BOUND TO NMDA RECEPTOR NR1C1 PEPTIDE                 |
| 2HUE        | BC                  | B        | STRUCTURE OF THE H3-H4 CHAPERONE ASF1 BOUND TO HISTONES H3 AND H4                         |
| 2HUE        | BC                  | B        | STRUCTURE OF THE H3-H4 CHAPERONE ASF1 BOUND TO HISTONES H3 AND H4                         |
| 2HUE        | BC                  | C        | STRUCTURE OF THE H3-H4 CHAPERONE ASF1 BOUND TO HISTONES H3 AND H4                         |
| 2HV8        | AD                  | D        | CRYSTAL STRUCTURE OF GTP-BOUND RAB11 IN COMPLEX WITH FIP3                                 |
| 2I2R        | BF                  | F        | CRYSTAL STRUCTURE OF THE KCHIP1/KV4.3 T1 COMPLEX                                          |
| 2IBF        | AB                  | B        | HUMAN VINCULIN'S HEAD DOMAIN (VH1, RESIDUES 1-258) IN COMPLEX WITH TWO VINCULIN BINDING S |
| 2IO5        | BC                  | B        | CRYSTAL STRUCTURE OF THE CIA- HISTONE H3-H4 COMPLEX                                       |
| 2IZV        | BC                  | C        | CRYSTAL STRUCTURE OF SOCS-4 IN COMPLEX WITH ELONGIN-B AND ELONGIN-C AT 2.55A RESOLUTION   |
| 2J9U        | CD                  | C        | 2 ANGSTROM X-RAY STRUCTURE OF THE YEAST ESCRT-I VPS28 C- TERMINUS IN COMPLEX WITH THE NZ  |
| 2JF9        | BQ                  | Q        | ESTROGEN RECEPTOR ALPHA LBD IN COMPLEX WITH A TAMOXIFEN- SPECIFIC PEPTIDE ANTAGONIST      |
| 2JFA        | AP                  | P        | ESTROGEN RECEPTOR ALPHA LBD IN COMPLEX WITH AN AFFINITY- SELECTED COREPRESSOR PEPTIDE     |
| 2JRI        | AC                  | A        | SOLUTION STRUCTURE OF THE JOSEPHIN DOMAIN OF ATAXIN-3 IN COMPLEX WITH UBIQUITIN MOLECU    |
| 2K2I        | AB                  | B        | NMR SOLUTION STRUCTURE OF THE C-TERMINAL DOMAIN (T94-Y172) OF THE HUMAN CENTRIN 2 IN COI  |
| 2NLA        | AB                  | B        | CRYSTAL STRUCTURE OF THE MCL-1:MNOXAB BH3 COMPLEX                                         |
| 2NNU        | AB                  | B        | CRYSTAL STRUCTURE OF THE PAPILLOMAVIRUS DNA TETHERING COMPLEX E2:BRD4                     |
| 2NOJ        | AB                  | B        | CRYSTAL STRUCTURE OF EHP / C3D COMPLEX                                                    |
| 2NUP        | BC                  | C        | CRYSTAL STRUCTURE OF THE HUMAN SEC23A/24A HETERODIMER, COMPLEXED WITH THE SNARE PROT      |
| 2O60        | AB                  | B        | CALMODULIN BOUND TO PEPTIDE FROM NEURONAL NITRIC OXIDE SYNTHASE                           |
| 2O8A        | BJ                  | J        | RAT PP1CGAMMA COMPLEXED WITH MOUSE INHIBITOR-2                                            |
| 2O8F        | AB                  | B        | HUMAN MUTSALPHA (MSH2/MSH6) BOUND TO DNA WITH A SINGLE BASE T INSERT                      |
| 2OBH        | AC                  | C        | CENTRIN-XPC PEPTIDE                                                                       |
| 2ODE        | AB                  | A        | CRYSTAL STRUCTURE OF THE HETERODIMERIC COMPLEX OF HUMAN RGS8 AND ACTIVATED G1 ALPHA 3     |
| 2OF5        | EK                  | E        | OLIGOMERIC DEATH DOMAIN COMPLEX                                                           |
| 2ONL        | BD                  | B        | CRYSTAL STRUCTURE OF THE P38A-MAPKAP KINASE 2 HETERODIMER                                 |
| 2OT3        | AB                  | A        | CRYSTAL STRUCTURE OF RABEX-5 VPS9 DOMAIN IN COMPLEX WITH NUCLEOTIDE FREE RAB21            |
| 2OZA        | AB                  | B        | STRUCTURE OF P38ALPHA COMPLEX                                                             |
| 2PIL        | AB                  | B        | STRUCTURE OF THE BCL-XL:BECLIN 1 COMPLEX                                                  |
| 2PIN        | DE                  | D        | MECHANISM OF AUXIN PERCEPTION BY THE TIR1 UBIQUITIN LIGASE                                |
| 2P22        | AC                  | A        | STRUCTURE OF THE YEAST ESCRT-I HETEROTETRAMER CORE                                        |
| 2P22        | AC                  | C        | STRUCTURE OF THE YEAST ESCRT-I HETEROTETRAMER CORE                                        |
| 2PBI        | AB                  | A        | THE MULTIFUNCTIONAL NATURE OF GBETA5/RGS9 REVEALED FROM ITS CRYSTAL STRUCTURE             |
| 2PBI        | AB                  | A        | THE MULTIFUNCTIONAL NATURE OF GBETA5/RGS9 REVEALED FROM ITS CRYSTAL STRUCTURE             |
| 2PBI        | AB                  | A        | THE MULTIFUNCTIONAL NATURE OF GBETA5/RGS9 REVEALED FROM ITS CRYSTAL STRUCTURE             |

TABLE S3

Jochim, et al

| A. PDB<br>CODE | E. FUNCTION                            | F. $\Delta\Delta G_{\text{AVG,HELIX}}$<br>(KCAL/MOL) | G. $\Delta\Delta G_{\text{SUM,HELIX}}$<br>(KCAL/MOL) | H. $\Delta\Delta G_{\text{SUM,CHAIN}}$<br>(KCAL/MOL) | I. HELIX<br>CONTRIBUTION |
|----------------|----------------------------------------|------------------------------------------------------|------------------------------------------------------|------------------------------------------------------|--------------------------|
| 2E9X           | REPLICATION                            | 3.2                                                  | 9.6                                                  | 16.9                                                 | 57%                      |
| 2E9X           | REPLICATION                            | 2.0                                                  | 8.0                                                  | 16.9                                                 | 47%                      |
| 2EFC           | TRANSPORT PROTEIN                      | 2.7                                                  | 8.0                                                  | 15.5                                                 | 52%                      |
| 2EHB           | SIGNALLING PROTEIN/TRANSFERASE         | 2.0                                                  | 5.9                                                  | 17.9                                                 | 33%                      |
| 2EHO           | REPLICATION                            | 3.6                                                  | 10.7                                                 | 14.4                                                 | 74%                      |
| 2EHO           | REPLICATION                            | 2.4                                                  | 4.7                                                  | 15.7                                                 | 30%                      |
| 2EHO           | REPLICATION                            | 2.1                                                  | 6.2                                                  | 13.7                                                 | 45%                      |
| 2EQB           | ENDOCYTOSIS/EXOCYTOSIS                 | 2.3                                                  | 6.9                                                  | 6.9                                                  | 100%                     |
| 2ES4           | HYDROLASE                              | 2.0                                                  | 4.0                                                  | 9.5                                                  | 42%                      |
| 2EY4           | ISOMERASE/BIOSYNTHETIC PROTEIN         | 2.0                                                  | 7.8                                                  | 18.6                                                 | 42%                      |
| 2F66           | TRANSPORT PROTEIN                      | 2.2                                                  | 13.1                                                 | 15.5                                                 | 85%                      |
| 2F66           | TRANSPORT PROTEIN                      | 3.4                                                  | 10.2                                                 | 11.3                                                 | 90%                      |
| 2F66           | TRANSPORT PROTEIN                      | 2.6                                                  | 20.5                                                 | 21.5                                                 | 95%                      |
| 2FK0           | VIRAL PROTEIN                          | 2.0                                                  | 3.9                                                  | 10.6                                                 | 37%                      |
| 2FO1           | GENE REGULATION/SIGNALLING PROTEIN/DNA | 2.2                                                  | 4.4                                                  | 5.4                                                  | 81%                      |
| 2FOT           | METAL BINDING, STRUCTURAL PROTEIN      | 2.9                                                  | 20.3                                                 | 20.3                                                 | 100%                     |
| 2FUG           | OXIDOREDUCTASE                         | 3.4                                                  | 6.8                                                  | 7.9                                                  | 86%                      |
| 2G38           | STRUCTURAL GENOMICS, UNKNOWN FUNCTION  | 2.4                                                  | 7.2                                                  | 22.9                                                 | 31%                      |
| 2G38           | STRUCTURAL GENOMICS, UNKNOWN FUNCTION  | 2.5                                                  | 4.9                                                  | 22.9                                                 | 21%                      |
| 2GGM           | CELL CYCLE                             | 3.1                                                  | 12.2                                                 | 12.2                                                 | 100%                     |
| 2GL7           | TRANSCRIPTION                          | 2.1                                                  | 6.3                                                  | 13.6                                                 | 46%                      |
| 2GMI           | LIGASE, HUMAN PROTEIN                  | 2.6                                                  | 7.9                                                  | 9.5                                                  | 83%                      |
| 2GOX           | CELL ADHESION/TOXIN                    | 2.3                                                  | 6.8                                                  | 8.0                                                  | 85%                      |
| 2HQW           | METAL BINDING PROTEIN                  | 3.2                                                  | 12.6                                                 | 14.5                                                 | 87%                      |
| 2HUE           | DNA BINDING PROTEIN                    | 3.1                                                  | 9.3                                                  | 24.8                                                 | 38%                      |
| 2HUE           | DNA BINDING PROTEIN                    | 2.1                                                  | 10.3                                                 | 24.8                                                 | 42%                      |
| 2HUE           | DNA BINDING PROTEIN                    | 2.5                                                  | 17.2                                                 | 22.5                                                 | 76%                      |
| 2HV8           | PROTEIN TRANSPORT                      | 2.4                                                  | 7.2                                                  | 7.2                                                  | 100%                     |
| 2I2R           | TRANSPORT PROTEIN                      | 3.7                                                  | 7.3                                                  | 46.4                                                 | 16%                      |
| 2IBF           | CELL ADHESION, STRUCTURAL PROTEIN      | 3.3                                                  | 19.8                                                 | 27.9                                                 | 71%                      |
| 2IO5           | CHAPERONE/STRUCTURAL PROTEIN           | 2.0                                                  | 7.8                                                  | 13.3                                                 | 59%                      |
| 2IZV           | TRANSCRIPTION                          | 2.0                                                  | 6.1                                                  | 10.3                                                 | 59%                      |
| 2J9U           | PROTEIN TRANSPORT                      | 2.0                                                  | 3.9                                                  | 3.9                                                  | 100%                     |
| 2JF9           | TRANSCRIPTION                          | 2.2                                                  | 10.9                                                 | 10.9                                                 | 100%                     |
| 2JFA           | TRANSCRIPTION                          | 2.3                                                  | 6.8                                                  | 6.8                                                  | 100%                     |
| 2JRI           | HYDROLASE/SIGNALING PROTEIN            | 2.0                                                  | 6.0                                                  | 17.9                                                 | 34%                      |
| 2K2I           | CELL CYCLE                             | 4.6                                                  | 9.2                                                  | 9.2                                                  | 100%                     |
| 2NLA           | APOPTOSIS                              | 2.2                                                  | 8.6                                                  | 8.6                                                  | 100%                     |
| 2NNU           | TRANSCRIPTION                          | 2.6                                                  | 10.2                                                 | 14.3                                                 | 71%                      |
| 2NOJ           | IMMUNE SYSTEM                          | 2.0                                                  | 6.1                                                  | 6.1                                                  | 100%                     |
| 2NUP           | PROTEIN TRANSPORT                      | 2.5                                                  | 10.1                                                 | 14.1                                                 | 72%                      |
| 2O60           | METAL BINDING PROTEIN                  | 2.5                                                  | 25.1                                                 | 25.1                                                 | 100%                     |
| 2O8A           | HYDROLASE/INHIBITOR                    | 2.1                                                  | 6.4                                                  | 25.3                                                 | 25%                      |
| 2O8F           | DNA BINDING PROTEIN/DNA                | 2.1                                                  | 4.2                                                  | 25.5                                                 | 16%                      |
| 2OBH           | CELL CYCLE                             | 3.6                                                  | 14.4                                                 | 14.4                                                 | 100%                     |
| 2ODE           | SIGNALING PROTEIN                      | 2.1                                                  | 6.3                                                  | 8.6                                                  | 73%                      |
| 2OF5           | APOPTOSIS                              | 2.8                                                  | 5.5                                                  | 9.3                                                  | 59%                      |
| 2ONL           | TRANSFERASE                            | 2.6                                                  | 10.5                                                 | 14.1                                                 | 74%                      |
| 2OT3           | PROTEIN TRANSPORT                      | 2.7                                                  | 5.4                                                  | 11.2                                                 | 48%                      |
| 2OZA           | SIGNALING PROTEIN/TRANSFERASE          | 2.2                                                  | 6.6                                                  | 27.8                                                 | 24%                      |
| 2P1L           | APOPTOSIS                              | 2.0                                                  | 10.2                                                 | 10.2                                                 | 100%                     |
| 2P1N           | SIGNALING PROTEIN                      | 2.1                                                  | 4.1                                                  | 12.4                                                 | 33%                      |
| 2P22           | TRANSPORT PROTEIN                      | 3.2                                                  | 12.8                                                 | 27.7                                                 | 46%                      |
| 2P22           | TRANSPORT PROTEIN                      | 2.0                                                  | 8.0                                                  | 19.9                                                 | 40%                      |
| 2PBI           | SIGNALING PROTEIN                      | 2.4                                                  | 7.1                                                  | 45.7                                                 | 16%                      |
| 2PBI           | SIGNALING PROTEIN                      | 2.1                                                  | 8.2                                                  | 45.7                                                 | 18%                      |
| 2PBI           | SIGNALING PROTEIN                      | 2.7                                                  | 10.7                                                 | 45.7                                                 | 23%                      |

TABLE S3

| A. PDB CODE | J. # HOTSPOT RESIDUES | K. HOTSPOT RESIDUES, RESIDUE #, $\Delta\Delta G$ (KCAL/MOL)                                      |
|-------------|-----------------------|--------------------------------------------------------------------------------------------------|
| 2E9X        | 3                     | L175, 2.3; F186, 3.3; W189, 4.0;                                                                 |
| 2E9X        | 4                     | L139, 1.1; F142, 1.4; F146, 3.4; M150, 2.1;                                                      |
| 2EFC        | 3                     | Y225, 4.7; T228, 1.0; F236, 2.3;                                                                 |
| 2EHB        | 3                     | L132, 1.6; L139, 2.0; E142, 2.3;                                                                 |
| 2EHO        | 3                     | R74, 1.0; D82, 1.1;                                                                              |
| 2EHO        | 2                     | Y87, 3.3; R94, 1.4;                                                                              |
| 2EHO        | 3                     | W71, 1.5; L72, 3.2; L76, 1.5;                                                                    |
| 2EQB        | 3                     | E102, 2.4; D103, 1.3; F109, 3.2;                                                                 |
| 2ES4        | 2                     | R268, 1.0; D276, 3.0;                                                                            |
| 2EY4        | 4                     | R45, 2.8; K49, 2.2; R50, 1.4; L53, 1.4;                                                          |
| 2F66        | 6                     | L356, 2.7; F359, 1.0; R368, 1.1; F371, 3.0; W375, 2.3; H376, 3.0;                                |
| 2F66        | 3                     | V332, 2.4; D340, 6.5; M348, 1.3;                                                                 |
| 2F66        | 8                     | F184, 1.0; I185, 1.7; Y188, 4.9; L189, 1.7; R192, 4.1; H196, 2.4; L197, 2.4; E200, 2.3;          |
| 2FK0        | 2                     | V100, 1.9; H111, 2.0;                                                                            |
| 2FO1        | 2                     | R71, 2.3; Y81, 2.1;                                                                              |
| 2FOT        | 7                     | W1192, 4.5; R1196, 2.1; L1197, 2.8; V1199, 2.3; T1204, 1.2; F1205, 4.4; K1209, 3.0;              |
| 2FUG        | 2                     | M107, 5.1; L113, 1.7;                                                                            |
| 2G38        | 3                     | W31, 3.5; E37, 2.0; F45, 1.7;                                                                    |
| 2G38        | 2                     | Y153, 3.0; L161, 1.9;                                                                            |
| 2GGM        | 4                     | W848, 5.4; L851, 2.1; L855, 2.9; L856, 1.8;                                                      |
| 2GL7        | 3                     | V44, 1.1; L48, 3.6; V49, 1.6;                                                                    |
| 2GMI        | 3                     | L11, 1.0; E18, 1.4; F8, 5.5;                                                                     |
| 2GOX        | 3                     | H130, 2.1; R131, 1.9; N138, 2.8;                                                                 |
| 2HQW        | 4                     | T879, 1.5; F880, 5.0; L887, 4.6; S890, 1.5;                                                      |
| 2HUE        | 3                     | F67, 4.9; I74, 1.4; F78, 3.0;                                                                    |
| 2HUE        | 5                     | L100, 2.0; V101, 1.5; F104, 1.9; L92, 2.8; Y99, 2.1;                                             |
| 2HUE        | 7                     | I50, 2.7; L58, 1.3; K59, 1.0; F61, 2.8; E63, 4.9; I66, 3.3; V70, 1.2;                            |
| 2HV8        | 3                     | Q735, 1.0; D739, 4.0; M746, 2.2;                                                                 |
| 2I2R        | 2                     | F111, 6.2; L118, 1.1;                                                                            |
| 2IBF        | 6                     | I566, 2.4; Y567, 10.2; K571, 1.2; L577, 3.2; S578, 1.1; L581, 1.7;                               |
| 2IO5        | 4                     | L100, 1.9; F104, 3.0; L92, 1.5; Y99, 1.4;                                                        |
| 2IZV        | 3                     | S67, 1.3; H68, 3.6; R82, 1.2;                                                                    |
| 2J9U        | 2                     | H178, 1.7; R190, 2.2;                                                                            |
| 2JF9        | 5                     | L12, 2.1; R5, 1.0; W7, 2.8; F8, 4.0; K9, 1.0;                                                    |
| 2JFA        | 3                     | L13, 2.1; L5, 1.2; I9, 3.5;                                                                      |
| 2JRI        | 3                     | V31, 1.4; S34, 1.5; H38, 3.1;                                                                    |
| 2K2I        | 2                     | L651, 2.2; W658, 7.0;                                                                            |
| 2NLA        | 4                     | L78, 2.8; I81, 1.6; D83, 2.8; V85, 1.4;                                                          |
| 2NNU        | 4                     | I1345, 2.2; F1349, 3.3; D1352, 2.3; L1353, 2.4;                                                  |
| 2NOJ        | 3                     | H74, 1.7; R75, 1.3; N82, 3.1;                                                                    |
| 2NUP        | 4                     | D116, 6.6; Q120, 1.2; K121, 1.2; K124, 1.1;                                                      |
| 2O60        | 10                    | L10, 4.5; E12, 1.0; V14, 2.1; K15, 1.0; F16, 3.9; K19, 1.0; L20, 2.0; F7, 5.0; K8, 1.4; K9, 3.2; |
| 2O8A        | 3                     | K137, 2.1; F141, 2.4; H148, 1.9;                                                                 |
| 2O8F        | 2                     | F1222, 2.8; I1227, 1.4;                                                                          |
| 2OBH        | 4                     | W848, 7.7; L851, 1.7; L855, 3.1; L856, 1.9;                                                      |
| 2ODE        | 3                     | E207, 2.7; K210, 2.4; H213, 1.2;                                                                 |
| 2OF5        | 2                     | R118, 3.1; Q125, 2.4;                                                                            |
| 2ONL        | 4                     | H126, 2.6; F129, 4.4; L130, 2.5; R136, 1.0;                                                      |
| 2OT3        | 2                     | Y354, 3.6; F365, 1.8;                                                                            |
| 2OZA        | 3                     | H126, 2.6; F129, 1.9; Y132, 2.1;                                                                 |
| 2PIL        | 5                     | L112, 1.6; L116, 2.2; K117, 1.3; D121, 2.0; F123, 3.1;                                           |
| 2PIN        | 2                     | V151, 3.0; W157, 1.1;                                                                            |
| 2P22        | 4                     | Y329, 9.2; D340, 1.4; L345, 1.0; R347, 1.2;                                                      |
| 2P22        | 4                     | L150, 2.6; K153, 2.4; L154, 1.0; E169, 2.0;                                                      |
| 2PBI        | 3                     | E69, 2.8; L73, 1.0; F76, 3.3;                                                                    |
| 2PBI        | 4                     | L244, 2.5; I247, 1.4; V248, 1.6; Y250, 2.7;                                                      |
| 2PBI        | 4                     | I226, 1.8; Y228, 3.2; Y229, 2.7; L233, 3.0;                                                      |

TABLE S3

Jochim, et al

| A. PDB CODE | L. HOTSPOT RESIDUE HELIX POSITIONS                | M. HOTSPOT RESIDUE END TO END LENGTH | N. HELIX LENGTH | O. HELIX START RESIDUE # | P. HELIX END RESIDUE # |
|-------------|---------------------------------------------------|--------------------------------------|-----------------|--------------------------|------------------------|
| 2E9X        | i; i+11; i+14;                                    | 15                                   | 23              | 170                      | 192                    |
| 2E9X        | i; i+3; i+7; i+11;                                | 12                                   | 24              | 131                      | 154                    |
| 2EFC        | i; i+3; i+11;                                     | 12                                   | 18              | 222                      | 239                    |
| 2EHB        | i; i+7; i+10;                                     | 11                                   | 15              | 129                      | 143                    |
| 2EHO        | i; i+8;                                           | 9                                    | 35              | 58                       | 92                     |
| 2EHO        | i; i+7;                                           | 8                                    | 14              | 84                       | 97                     |
| 2EHO        | i; i+1; i+5;                                      | 6                                    | 8               | 70                       | 77                     |
| 2EQB        | i; i+1; i+7;                                      | 8                                    | 54              | 84                       | 137                    |
| 2ES4        | i; i+8;                                           | 9                                    | 35              | 263                      | 297                    |
| 2EY4        | i; i+4; i+5; i+8;                                 | 9                                    | 13              | 42                       | 54                     |
| 2F66        | i; i+3; i+12; i+15; i+19; i+20;                   | 21                                   | 26              | 356                      | 381                    |
| 2F66        | i; i+8; i+16;                                     | 17                                   | 29              | 323                      | 351                    |
| 2F66        | i; i+1; i+4; i+5; i+8; i+12; i+13; i+16;          | 14                                   | 26              | 178                      | 203                    |
| 2FK0        | i; i+11;                                          | 12                                   | 24              | 94                       | 117                    |
| 2FO1        | i; i+10;                                          | 11                                   | 17              | 68                       | 84                     |
| 2FOT        | i; i+4; i+5; i+7; 13; 14; 18;                     | 18                                   | 21              | 1191                     | 1211                   |
| 2FUG        | i; i+6;                                           | 7                                    | 17              | 98                       | 114                    |
| 2G38        | i; i+6; i+14;                                     | 15                                   | 29              | 22                       | 50                     |
| 2G38        | i; i+8;                                           | 9                                    | 36              | 129                      | 164                    |
| 2GGM        | i; i+3; i+7; i+8;                                 | 9                                    | 16              | 848                      | 863                    |
| 2GL7        | i; i+4; i+5;                                      | 6                                    | 9               | 42                       | 50                     |
| 2GMI        | i; i+3; i+10;                                     | 11                                   | 14              | 6                        | 19                     |
| 2GOX        | i; i+1; i+8;                                      | 9                                    | 14              | 127                      | 140                    |
| 2HQW        | i; i+1; i+8; i+11;                                | 12                                   | 16              | 877                      | 892                    |
| 2HUE        | i; i+7; i+11;                                     | 12                                   | 16              | 64                       | 79                     |
| 2HUE        | i; i+7; i+8; i+9; i+12;                           | 13                                   | 29              | 86                       | 114                    |
| 2HUE        | i; i+8; i+9; i+11; i+13; i+16; i+20;              | 21                                   | 27              | 50                       | 76                     |
| 2HV8        | i; i+4; i+11;                                     | 12                                   | 31              | 717                      | 747                    |
| 2I2R        | i; i+7;                                           | 8                                    | 14              | 108                      | 121                    |
| 2IBF        | i; i+1; i+5; i+11; i+12; i+15;                    | 16                                   | 18              | 565                      | 582                    |
| 2IO5        | i; i+7; i+8; i+12;                                | 13                                   | 29              | 86                       | 114                    |
| 2IZV        | i; i+1; i+15;                                     | 16                                   | 17              | 67                       | 83                     |
| 2J9U        | i; i+12;                                          | 13                                   | 19              | 174                      | 192                    |
| 2JF9        | i; i+2; i+3; i+4; i+7;                            | 8                                    | 9               | 5                        | 13                     |
| 2JFA        | i; i+4; i+8;                                      | 9                                    | 13              | 2                        | 14                     |
| 2JRI        | i; i+3; i+7;                                      | 8                                    | 22              | 30                       | 51                     |
| 2K2I        | i; i+7;                                           | 8                                    | 10              | 651                      | 660                    |
| 2NLA        | i; i+3; i+5; i+7;                                 | 8                                    | 15              | 77                       | 91                     |
| 2NNU        | i; i+4; i+7; i+8;                                 | 9                                    | 11              | 1345                     | 1355                   |
| 2NOJ        | i; i+1; i+8;                                      | 9                                    | 14              | 71                       | 84                     |
| 2NUP        | i; i+4; i+5; i+8;                                 | 9                                    | 10              | 116                      | 125                    |
| 2O60        | i; i+1; i+2; i+3; i+5; i+7; i+8; i+9; i+12; i+13; | 14                                   | 15              | 7                        | 21                     |
| 2O8A        | i; i+4; i+11;                                     | 12                                   | 18              | 132                      | 149                    |
| 2O8F        | i; i+5;                                           | 6                                    | 20              | 1221                     | 1240                   |
| 2OBH        | i; i+3; i+7; i+8;                                 | 9                                    | 15              | 848                      | 862                    |
| 2ODE        | i; i+3; i+6;                                      | 7                                    | 10              | 205                      | 214                    |
| 2OF5        | i; i+7;                                           | 8                                    | 11              | 117                      | 127                    |
| 2ONL        | i; i+3; i+4; i+10;                                | 11                                   | 21              | 124                      | 144                    |
| 2OT3        | i; i+11;                                          | 12                                   | 18              | 351                      | 368                    |
| 2OZA        | i; i+3; i+6;                                      | 7                                    | 21              | 124                      | 144                    |
| 2PIL        | i; i+4; i+5; i+9; i+11;                           | 12                                   | 21              | 106                      | 126                    |
| 2P1N        | i; i+6;                                           | 7                                    | 14              | 146                      | 159                    |
| 2P22        | i; i+11; i+16; i+18;                              | 19                                   | 30              | 323                      | 352                    |
| 2P22        | i; i+3; i+4; i+19;                                | 20                                   | 25              | 147                      | 171                    |
| 2PBI        | i; i+4; i+7;                                      | 8                                    | 14              | 67                       | 80                     |
| 2PBI        | i; i+3; i+4; i+6;                                 | 7                                    | 15              | 240                      | 254                    |
| 2PBI        | i; i+2; i+3; i+7;                                 | 8                                    | 17              | 219                      | 235                    |

TABLE S3

| A. PDB<br>CODE | Q. HELIX SEQUENCE                                    | R. RESOLUTION |
|----------------|------------------------------------------------------|---------------|
| 2E9X           | EMERGLFQTGQKGLNDFQCWEKG                              | 2.30          |
| 2E9X           | NADISQSLQLTFIGRFRIMDSSQ                              | 2.30          |
| 2EFC           | EAAYFFTNILSAESFISN                                   | 2.09          |
| 2EHB           | REELKEMVVALLHES                                      | 2.10          |
| 2EHO           | LIPTIKFRHCSSLRNRRCTVAYLYDRLLRIRALRW                  | 3.00          |
| 2EHO           | RIRYVLSSYLRCRL                                       | 3.00          |
| 2EHO           | LWLAKGLF                                             | 3.00          |
| 2EQB           | NELRTKAEEDKLNKEVEDLTASLFDEANNMVADARKEKYAIEILNKRLTEQL | 2.70          |
| 2ES4           | PEAAAAAAQMQDDEAWQTRYQAYAAERDRIAAQG                   | 1.85          |
| 2EY4           | GEYRRRWKREVLG                                        | 2.11          |
| 2F66           | LDTFVKQGRELARQQFLVRWHIQRIT                           | 2.80          |
| 2F66           | DGLNQLYNLVAQDYALTDTIEALSRLHR                         | 2.80          |
| 2F66           | ADDLDQFIKNYLDIRTQYHLRREKLA                           | 2.80          |
| 2FK0           | YNAELLVLMENERTLDFHDSNVKN                             | 2.95          |
| 2FO1           | ELHRQRSELARANYEKA                                    | 3.12          |
| 2FOT           | PWKSARLMVHTVATFNSIKER                                | 2.45          |
| 2FUG           | DVVREAQAGMVEFTLLN                                    | 3.30          |
| 2G38           | DSMLAAARAWRSLDVEMTAVQRSFNRTL                         | 2.20          |
| 2G38           | TAQIADLDQEYDDFWDEDGEVMRDYRLRVSDALSCL                 | 2.20          |
| 2GGM           | WLLAKGLLIRERLKR                                      | 2.35          |
| 2GL7           | ADVKSLSVN                                            | 2.60          |
| 2GMI           | RNFRLLELEKGEK                                        | 2.50          |
| 2GOX           | VSAHRKAQKAVNLV                                       | 2.20          |
| 2HQW           | KATFRAITSTLASSFK                                     | 1.90          |
| 2HUE           | KLPFQRLVREIAQDFK                                     | 1.70          |
| 2HUE           | SSAVMALQEASEAYLVALFEDTNLCAIHA                        | 1.70          |
| 2HUE           | IYEETRGVLKVFLENVIRDAVITYTEHA                         | 1.70          |
| 2HV8           | RDELMEAIQKQEEINFRLQDYIDRIIVAIME                      | 1.86          |
| 2I2R           | FEDFVTALSILLRG                                       | 3.35          |
| 2IBF           | AIYEKAKEVSSALSKVLS                                   | 3.20          |
| 2IO5           | SSAVMALQEASEAYLVGLFEDTNLCAIHA                        | 2.70          |
| 2IZV           | SHVLSKVCMYFTYKVRY                                    | 2.55          |
| 2J9U           | KDQLHPLLAELLISINRVT                                  | 2.00          |
| 2JF9           | REWFKDMLS                                            | 2.10          |
| 2JFA           | AFQLRQLILRGLQ                                        | 2.55          |
| 2JRI           | PVELSSIAHQLDEEERMMAEG                                | NOT APP       |
| 2K2I           | LHRALQAWVT                                           | NOT APP       |
| 2NLA           | QLRRIGDKVNLRQKL                                      | 2.80          |
| 2NNU           | IDMNFQSDLLS                                          | 1.59          |
| 2NOJ           | VATHRKAQRAVNL                                        | 2.70          |
| 2NUP           | DTFIQTKKL                                            | 2.80          |
| 2O60           | FKKLAEAVKFSAKLM                                      | 1.55          |
| 2O8A           | PEEREKKRQFEMKRKLHY                                   | 2.61          |
| 2O8F           | TFDGTAIANAVVKELAETIK                                 | 3.25          |
| 2OBH           | WLLAKGLLIRERLK                                       | 1.80          |
| 2ODE           | RSERKKWIHC                                           | 1.90          |
| 2OF5           | DRQINQLAQRL                                          | 3.20          |
| 2ONL           | DDHVQFLIYQILRGLKYIHS                                 | 4.00          |
| 2OT3           | EDGYYFTNLCCAVAFIEK                                   | 2.10          |
| 2OZA           | DDHVQFLIYQILRGLKYIHS                                 | 2.70          |
| 2P1L           | SGTMENLSRRLKVTGDLFDIM                                | 2.50          |
| 2P1N           | EEEEVRRENQWAF                                        | 2.50          |
| 2P22           | DGLNQLYNLVAQDYALTDTIECLSRMLHRG                       | 2.70          |
| 2P22           | DIALKKKLEQNTKKLDEESSQLETT                            | 2.70          |
| 2PBI           | NLEAQNNGNFIVKY                                       | 1.95          |
| 2PBI           | SSVSLGGIVKYSEQF                                      | 1.95          |
| 2PBI           | VTAVRKEIMYYQQALMR                                    | 1.95          |

TABLE S3

Jochim, et al

| A. PDB CODE | B. INTERFACE CHAINS | C. CHAIN | D. TITLE                                                                                |
|-------------|---------------------|----------|-----------------------------------------------------------------------------------------|
| 2PJW        | H V                 | H        | THE VPS27/HSE1 COMPLEX IS A GAT DOMAIN-BASED SCAFFOLD FOR UBIQUITIN-DEPENDENT SORTING   |
| 2PQK        | A B                 | B        | X-RAY CRYSTAL STRUCTURE OF HUMAN MCL-1 IN COMPLEX WITH BIM BH3                          |
| 2PQN        | A B                 | B        | CRYSTAL STRUCTURE OF YEAST FIS1 COMPLEXED WITH A FRAGMENT OF YEAST MDV1                 |
| 2PQR        | A C                 | C        | CRYSTAL STRUCTURE OF YEAST FIS1 COMPLEXED WITH A FRAGMENT OF YEAST CAF4                 |
| 2PRG        | A C                 | C        | LIGAND-BINDING DOMAIN OF THE HUMAN PEROXISOME PROLIFERATOR ACTIVATED RECEPTOR GAMM.     |
| 2PSM        | B C                 | B        | CRYSTAL STRUCTURE OF INTERLEUKIN 15 IN COMPLEX WITH INTERLEUKIN 15 RECEPTOR ALPHA       |
| 2PV2        | D F                 | F        | CRYSTALLOGRAPHIC STRUCTURE OF SURA FIRST PEPTIDYL-PROLYL ISOMERASE DOMAIN COMPLEXED     |
| 2Q0O        | A C                 | C        | CRYSTAL STRUCTURE OF AN ANTI-ACTIVATION COMPLEX IN BACTERIAL QUORUM SENSING             |
| 2QAC        | A T                 | T        | THE CLOSED MTIP-MYOSINA-TAIL COMPLEX FROM THE MALARIA PARASITE INVASION MACHINERY       |
| 2QB0        | A D                 | A        | STRUCTURE OF THE 2TEL CRYSTALLIZATION MODULE FUSED TO T4 LYSOZYME WITH AN ALA-GLY-PRO I |
| 2QIY        | A C                 | C        | YEAST DEUBIQUITINASE UBP3 AND BRE5 COFACTOR COMPLEX                                     |
| 2QL2        | A B                 | B        | CRYSTAL STRUCTURE OF THE BASIC-HELIX-LOOP-HELIX DOMAINS OF THE HETERODIMER E47/NEUROD   |
| 2QLV        | A B                 | A        | CRYSTAL STRUCTURE OF THE HETEROTRIMER CORE OF THE S. CEREVISIAE AMPK HOMOLOG SNF1       |
| 2QXV        | A B                 | B        | STRUCTURAL BASIS OF EZH2 RECOGNITION BY EED                                             |
| 2R17        | A C                 | C        | FUNCTIONAL ARCHITECTURE OF THE RETROMER CARGO-RECOGNITION COMPLEX                       |
| 2RGN        | D E                 | E        | CRYSTAL STRUCTURE OF P63RHOGEF COMPLEX WITH GALPHA-Q AND RHOA                           |
| 2ROC        | A B                 | B        | SOLUTION STRUCTURE OF MCL-1 COMPLEXED WITH PUMA                                         |
| 2ROD        | A B                 | B        | SOLUTION STRUCTURE OF MCL-1 COMPLEXED WITH NOXAA                                        |
| 2SIV        | C D                 | C        | SIV GP41 CORE STRUCTURE                                                                 |
| 2SIV        | C D                 | D        | SIV GP41 CORE STRUCTURE                                                                 |
| 2UXN        | A B                 | A        | STRUCTURAL BASIS OF HISTONE DEMETHYLATION BY LSD1 REVEALED BY SUICIDE INACTIVATION      |
| 2VID        | A B                 | A        | STRUCTURAL BASIS OF LSD1-COREST SELECTIVITY IN HISTONE H3 RECOGNITION                   |
| 2V6Q        | A B                 | B        | CRYSTAL STRUCTURE OF A BHRF-1 : BIM BH3 COMPLEX                                         |
| 2V6X        | A B                 | A        | STRUCTURAL INSIGHT INTO THE INTERACTION BETWEEN ESCRT-III AND VPS4                      |
| 2VE7        | A C                 | A        | CRYSTAL STRUCTURE OF A BONSAI VERSION OF THE HUMAN NDC80 COMPLEX                        |
| 2VE7        | A C                 | A        | CRYSTAL STRUCTURE OF A BONSAI VERSION OF THE HUMAN NDC80 COMPLEX                        |
| 2VE7        | A C                 | C        | CRYSTAL STRUCTURE OF A BONSAI VERSION OF THE HUMAN NDC80 COMPLEX                        |
| 2VE7        | A C                 | C        | CRYSTAL STRUCTURE OF A BONSAI VERSION OF THE HUMAN NDC80 COMPLEX                        |
| 2VGO        | A D                 | D        | CRYSTAL STRUCTURE OF AURORA B KINASE IN COMPLEX WITH REVERSINE INHIBITOR                |
| 2VOF        | C D                 | D        | STRUCTURE OF MOUSE A1 BOUND TO THE PUMA BH3-DOMAIN                                      |
| 2VOI        | A B                 | B        | STRUCTURE OF MOUSE A1 BOUND TO THE BID BH3-DOMAIN                                       |
| 2W85        | A B                 | B        | STRUCTURE OF PEX14 IN COMPEX WITH PEX19                                                 |
| 2WAX        | A B                 | B        | STRUCTURE OF THE HUMAN DDX6 C-TERMINAL DOMAIN IN COMPLEX WITH AN EDC3-FDF PEPTIDE       |
| 2WIN        | H N                 | N        | C3 CONVERTASE (C3BBB) STABILIZED BY SCIN                                                |
| 2WME        | D C                 | D        | CRYSTALLOGRAPHIC STRUCTURE OF BETAINE ALDEHYDE DEHYDROGENASE FROM PSEUDOMONAS AE        |
| 2Z2S        | A B                 | A        | CRYSTAL STRUCTURE OF RHODOBACTER SPHAEROIDES SIGE IN COMPLEX WITH THE ANTI-SIGMA CHR    |
| 2Z2T        | A D                 | A        | CRYSTAL STRUCTURE OF THE COMPLEX BETWEEN GP41 FRAGMENT N36 AND FUSION INHIBITOR SC34EI  |
| 2Z2T        | B E                 | B        | CRYSTAL STRUCTURE OF THE COMPLEX BETWEEN GP41 FRAGMENT N36 AND FUSION INHIBITOR SC34EI  |
| 2Z2T        | C F                 | C        | CRYSTAL STRUCTURE OF THE COMPLEX BETWEEN GP41 FRAGMENT N36 AND FUSION INHIBITOR SC34EI  |
| 2Z3R        | C D                 | C        | CRYSTAL STRUCTURE OF THE IL-15/IL-15RA COMPLEX                                          |
| 2ZL1        | A B                 | B        | MP1-P14 SCAFFOLDING COMPLEX                                                             |
| 3B9F        | L H                 | L        | 1.6 A STRUCTURE OF THE PCI-THROMBIN-HEPARIN COMPLEX                                     |
| 3BC1        | A B                 | B        | CRYSTAL STRUCTURE OF THE COMPLEX RAB27A-SLP2A                                           |
| 3BEG        | A B                 | A        | CRYSTAL STRUCTURE OF SR PROTEIN KINASE 1 COMPLEXED TO ITS SUBSTRATE ASF/SF2             |
| 3BL2        | A C                 | C        | CRYSTAL STRUCTURE OF M11, THE BCL-2 HOMOLOG OF MURINE GAMMA- HERPESVIRUS 68, COMPLEXE   |
| 3BOW        | B C                 | B        | STRUCTURE OF M-CALPAIN IN COMPLEX WITH CALPASTATIN                                      |
| 3BOW        | B C                 | C        | STRUCTURE OF M-CALPAIN IN COMPLEX WITH CALPASTATIN                                      |
| 3BPL        | A B                 | A        | CRYSTAL STRUCTURE OF THE IL4-IL4R-COMMON GAMMA TERNARY COMPLEX                          |
| 3BPQ        | A B                 | A        | CRYSTAL STRUCTURE OF RELB-RELE ANTITOXIN-TOXIN COMPLEX FROM METHANOCOCCUS JANNASCH      |
| 3BRT        | A B                 | B        | NEMO/IKK ASSOCIATION DOMAIN STRUCTURE                                                   |
| 3BRV        | A B                 | B        | NEMO/IKKB ASSOCIATION DOMAIN STRUCTURE                                                  |
| 3BS5        | A B                 | B        | CRYSTAL STRUCTURE OF HCNK2-SAM/DHYP-SAM COMPLEX                                         |
| 3BXK        | A B                 | B        | CRYSTAL STRUCTURE OF THE P/Q-TYPE CALCIUM CHANNEL (CAV2.1) IQ DOMAIN AND CA2+CALMODULI  |
| 3C4M        | A C                 | C        | STRUCTURE OF HUMAN PARATHYROID HORMONE IN COMPLEX WITH THE EXTRACELLULAR DOMAIN O       |
| 3C59        | A B                 | A        | CRYSTAL STRUCTURE OF THE LIGAND-BOUND GLUCAGON-LIKE PEPTIDE- 1 RECEPTOR EXTRACELLULA    |
| 3D7V        | A B                 | B        | CRYSTAL STRUCTURE OF MCL-1 IN COMPLEX WITH AN MCL-1 SELECTIVE BH3 LIGAND                |
| 3DA7        | G H                 | H        | A CONFORMATIONALLY STRAINED, CIRCULAR PERMUTANT OF BARNASE                              |

TABLE S3

Jochim, et al

| A. PDB<br>CODE | E. FUNCTION                            | F. $\Delta\Delta G_{\text{AVG,HELIX}}$<br>(KCAL/MOL) | G. $\Delta\Delta G_{\text{SUM,HELIX}}$<br>(KCAL/MOL) | H. $\Delta\Delta G_{\text{SUM,CHAIN}}$<br>(KCAL/MOL) | I. HELIX<br>CONTRIBUTION |
|----------------|----------------------------------------|------------------------------------------------------|------------------------------------------------------|------------------------------------------------------|--------------------------|
| 2PJW           | ENDOCYTOSIS/EXOCYTOSIS                 | 2.2                                                  | 6.6                                                  | 28.3                                                 | 23%                      |
| 2PQK           | APOPTOSIS                              | 2.2                                                  | 20.0                                                 | 21.1                                                 | 95%                      |
| 2PQN           | APOPTOSIS                              | 2.4                                                  | 12.2                                                 | 14.1                                                 | 87%                      |
| 2PQR           | APOPTOSIS                              | 3.2                                                  | 12.6                                                 | 12.6                                                 | 100%                     |
| 2PRG           | COMPLEX (THIAZOLIDINEDIONE/RECEPTOR)   | 2.0                                                  | 8.1                                                  | 8.1                                                  | 100%                     |
| 2PSM           | CYTOKINE                               | 2.7                                                  | 13.5                                                 | 19.5                                                 | 69%                      |
| 2PV2           | ISOMERASE                              | 2.1                                                  | 10.4                                                 | 11.5                                                 | 90%                      |
| 2Q0O           | TRANSCRIPTION                          | 2.4                                                  | 9.4                                                  | 14.2                                                 | 66%                      |
| 2QAC           | MEMBRANE PROTEIN                       | 2.3                                                  | 18.0                                                 | 18.0                                                 | 100%                     |
| 2QB0           | HYDROLASE REGULATOR                    | 3.0                                                  | 9.0                                                  | 11.5                                                 | 78%                      |
| 2QIY           | SIGNALING PROTEIN/HYDROLASE            | 2.4                                                  | 7.1                                                  | 14.8                                                 | 48%                      |
| 2QL2           | TRANSCRIPTION/DNA                      | 2.0                                                  | 12.0                                                 | 13.8                                                 | 87%                      |
| 2QLV           | TRANSFERASE/PROTEIN BINDING            | 2.6                                                  | 5.1                                                  | 11.9                                                 | 43%                      |
| 2QXV           | GENE REGULATION                        | 2.4                                                  | 14.2                                                 | 14.2                                                 | 100%                     |
| 2R17           | PROTEIN TRANSPORT                      | 2.3                                                  | 4.5                                                  | 9.5                                                  | 47%                      |
| 2RGN           | SIGNALING PROTEIN COMPLEX              | 2.1                                                  | 6.3                                                  | 13.8                                                 | 46%                      |
| 2ROC           | APOPTOSIS                              | 2.4                                                  | 12.1                                                 | 12.1                                                 | 100%                     |
| 2ROD           | APOPTOSIS                              | 2.5                                                  | 12.4                                                 | 12.4                                                 | 100%                     |
| 2SIV           | ENVELOPE GLYCOPROTEIN                  | 2.1                                                  | 8.2                                                  | 9.6                                                  | 85%                      |
| 2SIV           | ENVELOPE GLYCOPROTEIN                  | 2.0                                                  | 3.9                                                  | 9.6                                                  | 41%                      |
| 2UXN           | OXIDOREDUCTASE/TRANSCRIPTION REGULATOR | 2.4                                                  | 9.7                                                  | 26.6                                                 | 36%                      |
| 2V1D           | OXIDOREDUCTASE/REPRESSOR               | 2.0                                                  | 5.9                                                  | 23.3                                                 | 25%                      |
| 2V6Q           | APOPTOSIS                              | 2.1                                                  | 12.7                                                 | 12.7                                                 | 100%                     |
| 2V6X           | PROTEIN TRANSPORT                      | 2.3                                                  | 6.8                                                  | 11.5                                                 | 59%                      |
| 2VE7           | CELL CYCLE                             | 2.4                                                  | 7.2                                                  | 30.1                                                 | 24%                      |
| 2VE7           | CELL CYCLE                             | 2.0                                                  | 4.0                                                  | 30.1                                                 | 13%                      |
| 2VE7           | CELL CYCLE                             | 2.6                                                  | 5.1                                                  | 28.9                                                 | 18%                      |
| 2VE7           | CELL CYCLE                             | 2.7                                                  | 13.4                                                 | 28.9                                                 | 46%                      |
| 2VGO           | TRANSFERASE                            | 2.5                                                  | 4.9                                                  | 20.1                                                 | 24%                      |
| 2VOF           | APOPTOSIS                              | 2.5                                                  | 17.3                                                 | 19.4                                                 | 89%                      |
| 2VOI           | APOPTOSIS                              | 2.1                                                  | 8.2                                                  | 8.2                                                  | 100%                     |
| 2W85           | PROTEIN TRANSPORT                      | 2.0                                                  | 4.0                                                  | 4.0                                                  | 100%                     |
| 2WAX           | HYDROLASE                              | 2.3                                                  | 6.8                                                  | 18.7                                                 | 36%                      |
| 2WIN           | IMMUNE SYSTEM                          | 2.0                                                  | 6.1                                                  | 10.8                                                 | 56%                      |
| 2WME           | OXIDOREDUCTASE                         | 2.3                                                  | 4.5                                                  | 18.4                                                 | 24%                      |
| 2Z2S           | TRANSCRIPTION                          | 2.4                                                  | 7.1                                                  | 27.8                                                 | 26%                      |
| 2Z2T           | VIRAL PROTEIN/INHIBITOR                | 2.4                                                  | 9.4                                                  | 9.4                                                  | 100%                     |
| 2Z2T           | VIRAL PROTEIN/INHIBITOR                | 2.0                                                  | 7.8                                                  | 7.8                                                  | 100%                     |
| 2Z2T           | VIRAL PROTEIN/INHIBITOR                | 2.2                                                  | 6.6                                                  | 9.0                                                  | 73%                      |
| 2Z3R           | CYTOKINE/CYTOKINE RECEPTOR             | 2.8                                                  | 8.3                                                  | 10.4                                                 | 80%                      |
| 2ZL1           | PROTEIN BINDING                        | 2.0                                                  | 6.1                                                  | 14.4                                                 | 42%                      |
| 3B9F           | HYDROLASE/HYDROLASE INHIBITOR          | 2.3                                                  | 9.0                                                  | 17.6                                                 | 51%                      |
| 3BC1           | SIGNALING PROTEIN/TRANSPORT PROTEIN    | 2.1                                                  | 10.6                                                 | 15.3                                                 | 69%                      |
| 3BEG           | TRANSFERASE/SPLICING                   | 3.5                                                  | 7.0                                                  | 12.4                                                 | 56%                      |
| 3BL2           | VIRAL PROTEIN/APOPTOSIS                | 2.4                                                  | 12.1                                                 | 12.1                                                 | 100%                     |
| 3BOW           | HYDROLASE/HYDROLASE INHIBITOR          | 2.0                                                  | 5.9                                                  | 13.7                                                 | 43%                      |
| 3BOW           | HYDROLASE/HYDROLASE INHIBITOR          | 2.2                                                  | 6.5                                                  | 8.8                                                  | 74%                      |
| 3BPL           | CYTOKINE/CYTOKINE RECEPTOR             | 2.0                                                  | 8.1                                                  | 12.6                                                 | 64%                      |
| 3BPQ           | TOXIN                                  | 2.2                                                  | 11.1                                                 | 13.1                                                 | 85%                      |
| 3BRT           | TRANSFERASE/TRANSCRIPTION              | 2.5                                                  | 4.9                                                  | 7.8                                                  | 63%                      |
| 3BRV           | TRANSFERASE/TRANSCRIPTION              | 2.0                                                  | 8.0                                                  | 12.7                                                 | 63%                      |
| 3BS5           | SIGNALING PROTEIN/MEMBRANE PROTEIN     | 2.3                                                  | 11.5                                                 | 11.5                                                 | 100%                     |
| 3B XK          | MEMBRANE PROTEIN, SIGNALING PROTEIN    | 2.1                                                  | 12.3                                                 | 12.3                                                 | 100%                     |
| 3C4M           | MEMBRANE PROTEIN                       | 2.8                                                  | 11.3                                                 | 12.4                                                 | 91%                      |
| 3C59           | SIGNALING PROTEIN/SIGNALING PROTEIN    | 2.2                                                  | 4.3                                                  | 8.6                                                  | 50%                      |
| 3D7V           | APOPTOSIS                              | 2.4                                                  | 17.1                                                 | 17.1                                                 | 100%                     |
| 3DA7           | PROTEIN BINDING                        | 2.7                                                  | 13.7                                                 | 18.3                                                 | 75%                      |

TABLE S3

| A. PDB CODE | J. # HOTSPOT RESIDUES | K. HOTSPOT RESIDUES, RESIDUE #, $\Delta\Delta G$ (KCAL/MOL)                             |
|-------------|-----------------------|-----------------------------------------------------------------------------------------|
| 2PJW        | 3                     | L359, 2.6; E363, 1.6; Y366, 2.4;                                                        |
| 2PQK        | 9                     | L10, 2.2; R11, 3.2; I13, 2.2; D15, 2.7; F17, 2.7; Y21, 2.2; E3, 1.8; W5, 1.0; I6, 2.0;  |
| 2PQN        | 5                     | L148, 1.6; F149, 4.0; F152, 3.9; Y155, 1.5; L156, 1.2;                                  |
| 2PQR        | 4                     | L126, 2.3; F127, 4.6; F130, 4.0; I137, 1.7;                                             |
| 2PRG        | 4                     | K632, 1.1; L633, 2.3; L636, 1.5; L637, 3.2;                                             |
| 2PSM        | 5                     | E46, 4.6; Q48, 1.1; V49, 2.4; H52, 2.0; E53, 3.4;                                       |
| 2PV2        | 5                     | F10, 1.1; T3, 1.2; L4, 1.6; W7, 5.2; D8, 1.3;                                           |
| 2Q0O        | 4                     | R40, 1.8; Y50, 2.6; W53, 3.8; L54, 1.2;                                                 |
| 2QAC        | 8                     | R806, 4.3; V807, 1.7; Q808, 2.2; H810, 3.4; I811, 2.3; R812, 1.1; K813, 2.0; V816, 1.0; |
| 2QB0        | 3                     | E68, 1.3; Y72, 3.4; R73, 4.3;                                                           |
| 2QIY        | 3                     | E216, 1.8; F217, 2.4; R224, 2.9;                                                        |
| 2QL2        | 6                     | K139, 1.1; L143, 3.0; K147, 2.1; Y149, 1.9; I150, 1.9; L153, 2.0;                       |
| 2QLV        | 2                     | L516, 2.5; Y523, 2.6;                                                                   |
| 2QXV        | 6                     | F42, 4.3; R46, 1.5; I49, 2.2; R52, 2.4; L56, 1.7; W60, 2.1;                             |
| 2R17        | 2                     | F534, 3.4; F541, 1.1;                                                                   |
| 2RGN        | 3                     | E215, 1.4; W216, 1.3; Y220, 3.6;                                                        |
| 2ROC        | 5                     | L141, 3.9; I144, 2.1; D146, 1.1; L148, 1.8; Y152, 3.2;                                  |
| 2ROD        | 5                     | F23, 3.6; L27, 2.4; I30, 2.7; D32, 1.1; W38, 2.6;                                       |
| 2SIV        | 4                     | V558, 1.0; L565, 1.8; W571, 2.3; L576, 3.1;                                             |
| 2SIV        | 2                     | W631, 2.6; I642, 1.3;                                                                   |
| 2UXN        | 4                     | I474, 2.4; F478, 3.7; D486, 1.5; Y494, 2.1;                                             |
| 2VID        | 3                     | F478, 2.8; R485, 1.9; D486, 1.2;                                                        |
| 2V6Q        | 6                     | W57, 2.2; I58, 1.8; E61, 3.1; L62, 2.3; R63, 1.4; F69, 1.9;                             |
| 2V6X        | 3                     | F60, 2.1; L64, 1.5; R66, 3.2;                                                           |
| 2VE7        | 3                     | L1128, 1.0; Y1138, 3.8; L1142, 2.4;                                                     |
| 2VE7        | 2                     | W187, 2.1; I194, 1.9;                                                                   |
| 2VE7        | 2                     | F82, 3.5; I98, 1.6;                                                                     |
| 2VE7        | 5                     | F127, 1.1; F130, 4.2; R131, 1.2; Y138, 5.7; F141, 1.2;                                  |
| 2VGO        | 2                     | L807, 1.2; Y815, 3.7;                                                                   |
| 2VOF        | 7                     | W133, 3.2; I137, 2.2; L141, 2.1; R142, 2.7; I144, 1.1; D146, 3.9; L148, 2.1;            |
| 2VOI        | 4                     | I82, 1.5; I86, 2.3; L90, 2.0; D95, 2.4;                                                 |
| 2W85        | 2                     | F105, 1.3; F110, 2.7;                                                                   |
| 2WAX        | 3                     | K215, 1.9; F219, 3.4; I222, 1.5;                                                        |
| 2WIN        | 3                     | F60, 2.7; K61, 1.5; Y68, 1.9;                                                           |
| 2WME        | 2                     | R269, 2.8; M276, 1.7;                                                                   |
| 2Z2S        | 3                     | F30, 3.6; H32, 1.1; K38, 2.4;                                                           |
| 2Z2T        | 4                     | Q1551, 1.0; L1565, 4.2; L1568, 2.2; W1571, 2.0;                                         |
| 2Z2T        | 4                     | H2564, 1.0; L2565, 2.1; L2568, 2.2; W2571, 2.5;                                         |
| 2Z2T        | 3                     | Q3551, 1.6; L3568, 2.3; W3571, 2.7;                                                     |
| 2Z3R        | 3                     | E46, 3.6; V49, 1.0; E53, 3.7;                                                           |
| 2ZL1        | 3                     | I48, 1.5; I52, 1.8; Y56, 2.8;                                                           |
| 3B9F        | 4                     | E14, 1.4; E14, 2.9; L14, 2.1; Y14, 2.6;                                                 |
| 3BC1        | 5                     | I15, 1.3; V18, 1.7; R21, 2.6; L25, 2.0; R32, 3.0;                                       |
| 3BEG        | 2                     | D564, 3.6; E571, 3.4;                                                                   |
| 3BL2        | 5                     | L110, 2.9; L114, 2.5; K115, 1.3; D119, 1.3; F121, 4.1;                                  |
| 3BOW        | 3                     | F103, 1.4; L106, 2.7; L110, 1.8;                                                        |
| 3BOW        | 3                     | I653, 2.7; L656, 2.7; D659, 1.1;                                                        |
| 3BPL        | 4                     | R81, 2.1; R85, 1.0; R88, 3.4; W91, 1.6;                                                 |
| 3BPQ        | 5                     | E21, 3.0; I23, 1.0; L24, 2.4; L28, 2.6; M32, 2.1;                                       |
| 3BRT        | 2                     | R75, 2.0; L93, 2.9;                                                                     |
| 3BRV        | 4                     | R75, 2.4; F82, 2.1; E89, 1.3; F92, 2.2;                                                 |
| 3BS5        | 5                     | I165, 1.7; H167, 2.9; Q168, 1.6; L170, 3.2; E173, 2.1;                                  |
| 3BXK        | 6                     | I1961, 1.9; Y1962, 1.6; M1965, 1.0; I1967, 3.1; Y1971, 2.7; R1972, 2.0;                 |
| 3C4M        | 4                     | R20, 5.9; W23, 1.8; L24, 2.6; L28, 1.0;                                                 |
| 3C59        | 2                     | L32, 1.7; W39, 2.6;                                                                     |
| 3D7V        | 7                     | E55, 2.7; W57, 1.0; I58, 3.3; R63, 2.7; I65, 2.4; D67, 2.9; Y73, 2.1;                   |
| 3DA7        | 5                     | L35, 1.6; D36, 1.5; D40, 6.7; C41, 1.0; W45, 2.9;                                       |



TABLE S3

Jochim, et al

| A. PDB CODE | L. HOTSPOT RESIDUE HELIX POSITIONS             | M. HOTSPOT RESIDUE END TO END LENGTH | N. HELIX LENGTH | O. HELIX START RESIDUE # | P. HELIX END RESIDUE # |
|-------------|------------------------------------------------|--------------------------------------|-----------------|--------------------------|------------------------|
| 2PJW        | i; i+4; i+7;                                   | 8                                    | 16              | 354                      | 369                    |
| 2PQK        | i; i+2; i+3; i+7; i+8; i+10; i+12; i+14; i+18; | 19                                   | 22              | 1                        | 22                     |
| 2PQN        | i; i+1; i+4; i+7; i+8;                         | 9                                    | 16              | 148                      | 163                    |
| 2PQR        | i; i+1; i+4; i+11;                             | 12                                   | 15              | 126                      | 140                    |
| 2PRG        | i; i+1; i+4; i+5;                              | 6                                    | 8               | 631                      | 638                    |
| 2PSM        | i; i+2; i+3; i+6; i+7;                         | 8                                    | 19              | 36                       | 54                     |
| 2PV2        | i; i+1; i+4; i+5; i+7;                         | 8                                    | 9               | 3                        | 11                     |
| 2Q0O        | i; i+10; i+13; i+14;                           | 15                                   | 33              | 25                       | 57                     |
| 2QAC        | i; i+1; i+2; i+4; i+5; i+6; i+7; i+10;         | 8                                    | 13              | 805                      | 817                    |
| 2QB0        | i; i+4; i+5;                                   | 6                                    | 8               | 67                       | 74                     |
| 2QIY        | i; i+1; i+8;                                   | 9                                    | 16              | 214                      | 229                    |
| 2QL2        | i; i+4; i+8; i+10; i+11; i+14;                 | 15                                   | 19              | 139                      | 157                    |
| 2QLV        | i; i+7;                                        | 8                                    | 14              | 516                      | 529                    |
| 2QXV        | i; i+4; i+7; i+10; i+14; i+18;                 | 19                                   | 23              | 41                       | 63                     |
| 2R17        | i; i+7;                                        | 8                                    | 22              | 524                      | 545                    |
| 2RGN        | i; i+1; i+5;                                   | 6                                    | 21              | 210                      | 230                    |
| 2ROC        | i; i+3; i+5; i+7; i+11;                        | 12                                   | 25              | 131                      | 155                    |
| 2ROD        | i; i+4; i+7; i+9; i+15;                        | 16                                   | 19              | 22                       | 40                     |
| 2SIV        | i; i+7; i+13; i+18;                            | 19                                   | 35              | 547                      | 581                    |
| 2SIV        | i; i+11;                                       | 12                                   | 32              | 629                      | 660                    |
| 2UXN        | i; i+4; i+12; i+20;                            | 21                                   | 40              | 474                      | 513                    |
| 2V1D        | i; i+7; i+8;                                   | 9                                    | 34              | 474                      | 507                    |
| 2V6Q        | i; i+1; i+4; i+5; i+6; i+12;                   | 13                                   | 19              | 53                       | 71                     |
| 2V6X        | i; i+4; i+6;                                   | 7                                    | 31              | 50                       | 80                     |
| 2VE7        | i; 11; 15;                                     | 15                                   | 20              | 1124                     | 1143                   |
| 2VE7        | i; i+7;                                        | 8                                    | 22              | 177                      | 198                    |
| 2VE7        | i; i+16;                                       | 17                                   | 21              | 79                       | 99                     |
| 2VE7        | i; i+3; i+4; i+11; i+14;                       | 15                                   | 29              | 114                      | 142                    |
| 2VGO        | i; i+8;                                        | 9                                    | 13              | 805                      | 817                    |
| 2VOF        | i; i+4; i+8; i+9; i+11; i+13; i+15;            | 16                                   | 20              | 133                      | 152                    |
| 2VOI        | i; i+4; i+8; i+13;                             | 14                                   | 21              | 79                       | 99                     |
| 2W85        | i; i+5;                                        | 6                                    | 11              | 102                      | 112                    |
| 2WAX        | i; i+4; i+7;                                   | 8                                    | 12              | 215                      | 226                    |
| 2WIN        | i; i+1; i+8;                                   | 9                                    | 24              | 60                       | 83                     |
| 2WME        | i; i+7;                                        | 8                                    | 11              | 267                      | 277                    |
| 2Z2S        | i; i+2; i+8;                                   | 9                                    | 19              | 23                       | 41                     |
| 2Z2T        | i; i+14; i+17; i+20;                           | 21                                   | 35              | 1547                     | 1581                   |
| 2Z2T        | i; i+1; i+4; i+7;                              | 8                                    | 34              | 2547                     | 2580                   |
| 2Z2T        | i; 18; 21;                                     | 21                                   | 35              | 3547                     | 3581                   |
| 2Z3R        | i; i+3; i+7;                                   | 8                                    | 20              | 36                       | 55                     |
| 2ZL1        | i; i+4; i+8;                                   | 9                                    | 20              | 42                       | 61                     |
| 3B9F        | i; i+2; i+3; i+7;                              | 8                                    | 9               | 14                       | 14                     |
| 3BC1        | i; i+3; i+6; i+10; i+17;                       | 18                                   | 29              | 7                        | 35                     |
| 3BEG        | i; i+7;                                        | 8                                    | 13              | 561                      | 573                    |
| 3BL2        | i; i+4; i+5; i+9; i+11;                        | 12                                   | 17              | 107                      | 123                    |
| 3BOW        | i; i+3; i+7;                                   | 8                                    | 14              | 99                       | 112                    |
| 3BOW        | i; i+3; i+6;                                   | 7                                    | 9               | 652                      | 660                    |
| 3BPL        | i; i+4; i+7; i+10;                             | 11                                   | 26              | 70                       | 95                     |
| 3BPQ        | i; i+2; i+3; i+7; i+11;                        | 12                                   | 22              | 14                       | 35                     |
| 3BRT        | i; i+18;                                       | 19                                   | 60              | 50                       | 109                    |
| 3BRV        | i; i+7; i+14; i+17;                            | 18                                   | 60              | 50                       | 109                    |
| 3BS5        | i; i+2; i+3; i+5; i+8;                         | 9                                    | 19              | 165                      | 183                    |
| 3BXK        | i; i+1; i+4; i+6; 11; 12;                      | 12                                   | 16              | 1961                     | 1976                   |
| 3C4M        | i; i+3; i+4; i+8;                              | 9                                    | 19              | 16                       | 34                     |
| 3C59        | i; i+7;                                        | 8                                    | 22              | 32                       | 53                     |
| 3D7V        | i; i+2; i+3; i+8; i+10; i+12; i+18;            | 19                                   | 22              | 54                       | 75                     |
| 3DA7        | i; i+1; i+5; i+10;                             | 11                                   | 12              | 35                       | 46                     |

TABLE S3

| A. PDB<br>CODE | Q. HELIX SEQUENCE                                           | R. RESOLUTION |
|----------------|-------------------------------------------------------------|---------------|
| 2PJW           | SLRQVLANAERSYNQL                                            | 3.01          |
| 2PQK           | RPEIWIAQELRRIGDEFNAYYA                                      | 2.00          |
| 2PQN           | LFQGFKSYLPIAELAI                                            | 2.15          |
| 2PQR           | LFEGFKATVSIHQQR                                             | 1.88          |
| 2PRG           | HKLVQLLT                                                    | 2.30          |
| 2PSM           | KVTAMNCFLELQVILHEY                                          | 2.19          |
| 2PV2           | TLKFWDIR                                                    | 1.30          |
| 2Q00           | KSELEALAVSAIREHRRLLWADQAVYEEWLRAS                           | 2.00          |
| 2QAC           | MRVQAHIRKRMVA                                               | 1.70          |
| 2QB0           | KEDFRYRS                                                    | 2.56          |
| 2QIY           | EAEFAAASVQRYELNM                                            | 1.69          |
| 2QL2           | KIETLRLAKNYIWALSEIL                                         | 2.50          |
| 2QLV           | LDVMGEIYIALKNL                                              | 2.60          |
| 2QXV           | MFSSNRQKILERTETLNQEWKQR                                     | 1.82          |
| 2R17           | RIRFTLPLVFAAYQLAFRYKE                                       | 2.80          |
| 2RGN           | IQQIYEWHRDYFLQELQRCLK                                       | 3.50          |
| 2ROC           | EEWAREIGAQLRRIADDLNAQYERR                                   | NOT APP       |
| 2ROD           | EFAAQLRKIGDKVYCTWSA                                         | NOT APP       |
| 2SIV           | GIVQQQQQLLDVVKRQQLLRLTVWGKTNLQTRVT                          | 2.20          |
| 2SIV           | QEWERKVDFFLEENITALLEEAQIQEKNMYEL                            | 2.20          |
| 2UXN           | ITAFLVKSKHRDLTALCKEYDELAETQGKLEEKLELEA                      | 2.72          |
| 2VID           | ITAFLVKSKHRDLTALCKEYDELAETQGKLEEK                           | 3.10          |
| 2V6Q           | RPEIWIAQELRRIGDEFNA                                         | 2.70          |
| 2V6X           | PKSKDLIRAKFTEYLNRAEQLKKHLESEEAN                             | 1.98          |
| 2VE7           | NAERLKRQLKSADLYKDRLG                                        | 2.88          |
| 2VE7           | TWPHIVAALVWLIDCIKIHTAM                                      | 2.88          |
| 2VE7           | MEGFLPFSNLVTHLDSFLPIC                                       | 2.88          |
| 2VE7           | AKRTSRFLSGIINFIHFREACRETYMEFL                               | 2.88          |
| 2VGO           | NLLTQAIRQQYYK                                               | 1.70          |
| 2VOF           | WAREIGAQLRRIADDLNAQY                                        | 1.80          |
| 2VOI           | QEEIHNIRHLAQIGDEMDH                                         | 2.10          |
| 2W85           | QEKFFQELFDS                                                 | NOT APP       |
| 2WAX           | KAAVFEEIDTYE                                                | 2.30          |
| 2WIN           | FKKMSEAKYQLQKIYNEIDEALKS                                    | 3.90          |
| 2WME           | LDRAADIIVMA                                                 | 2.10          |
| 2Z2S           | EAAFAELFQHFAPKVKGFL                                         | 2.70          |
| 2Z2T           | DIVQQQNNLLRAIEAQHLLQLTVWGKQLQARIL                           | 2.10          |
| 2Z2T           | DIVQQQNNLLRAIEAQHLLQLTVWGKQLQARI                            | 2.10          |
| 2Z2T           | DIVQQQNNLLRAIEAQHLLQLTVWGKQLQARIL                           | 2.10          |
| 2Z3R           | KVTAMKCFLELQVISLESG                                         | 2.00          |
| 2ZL1           | ARVTAASNIWAAYDRNGN                                          | 2.00          |
| 3B9F           | ERELLESYI                                                   | 1.60          |
| 3BC1           | PEFEEQEAIMKVLQRDAALKRAEEERVH                                | 1.80          |
| 3BEG           | RDEDHIALIHELL                                               | 2.90          |
| 3BL2           | MENLSRRLKVTGDLFDI                                           | 2.30          |
| 3BOW           | EERQFRKLFVQLAG                                              | 2.40          |
| 3BOW           | PIDALSEDL                                                   | 2.40          |
| 3BPL           | AQQFHRHKQLIRFLKRLDRNLWGLAG                                  | 2.93          |
| 3BPQ           | RKEYEKIEEILDIGLAKAMEET                                      | 2.20          |
| 3BRT           | TLQRCLEENQELRDAIRQSNQILRERCEELLHFQASQREEKEFLMCKFQEARLVERLGL | 2.25          |
| 3BRV           | TLQRCLEENQELRDAIRQSNQILRERCEELLHFQASQREEKEFLMCKFQEARLVERLGL | 2.20          |
| 3BS5           | IGHQELILEAVDLLCALNY                                         | 2.00          |
| 3BXK           | IYAAMMIMEYYRQSKA                                            | 2.55          |
| 3C4M           | NSMERVEWLRKQLQDVHNF                                         | 1.95          |
| 3C59           | LWETVQKWREYRRQCQRSLTED                                      | 2.30          |
| 3D7V           | PEIWIAQEARRIGDEANAYYAR                                      | 2.03          |
| 3DA7           | LDALWDCLTGWV                                                | 2.25          |

TABLE S3

Jochim, et al

| A. PDB<br>CODE | B. INTERFACE<br>CHAINS | C. CHAIN | D. TITLE                                                                              |
|----------------|------------------------|----------|---------------------------------------------------------------------------------------|
| 3DCG           | A B                    | B        | CRYSTAL STRUCTURE OF THE HIV VIF BC-BOX IN COMPLEX WITH HUMAN ELONGINB AND ELONGINC   |
| 3DD7           | C D                    | D        | STRUCTURE OF DOCH66Y IN COMPLEX WITH THE C-TERMINAL DOMAIN OF PHD                     |
| 3DI2           | A B                    | A        | CRYSTAL STRUCTURE OF THE COMPLEX OF HUMAN INTERLEUKIN-7 WITH UNGLYCOSYLATED HUMAN I   |
| 3DI2           | C D                    | C        | CRYSTAL STRUCTURE OF THE COMPLEX OF HUMAN INTERLEUKIN-7 WITH UNGLYCOSYLATED HUMAN I   |
| 3DVE           | A B                    | B        | CRYSTAL STRUCTURE OF CA2+/CAM-CAV2.2 IQ DOMAIN COMPLEX                                |
| 3DVU           | B D                    | D        | CRYSTAL STRUCTURE OF THE COMPLEX OF MURINE GAMMA- HERPESVIRUS 68 BCL-2 HOMOLOG M11 AN |
| 3E95           | B C                    | C        | CRYSTAL STRUCTURE OF THE PLASMODIUM FALCIPARUM UBIQUITIN CONJUGATING ENZYME COMPLE    |
| 3EAB           | B H                    | B        | CRYSTAL STRUCTURE OF SPASTIN MIT IN COMPLEX WITH ESCRT III                            |
| 3EAB           | D J                    | J        | CRYSTAL STRUCTURE OF SPASTIN MIT IN COMPLEX WITH ESCRT III                            |
| 3EX7           | A B                    | A        | THE CRYSTAL STRUCTURE OF EJC IN ITS TRANSITION STATE                                  |
| 3EX7           | A C                    | C        | THE CRYSTAL STRUCTURE OF EJC IN ITS TRANSITION STATE                                  |
| 3EZQ           | K L                    | K        | CRYSTAL STRUCTURE OF THE FAS/FADD DEATH DOMAIN COMPLEX                                |
| 3FAL           | C D                    | D        | HUMANRXR ALPHA & MOUSE LXR ALPHA COMPLEXED WITH RETENOIC ACID AND GSK2186             |
| 3FWB           | A B                    | B        | SAC3:SUS1:CDC31 COMPLEX                                                               |
| 3G9V           | C D                    | D        | CRYSTAL STRUCTURE OF A SOLUBLE DECOY RECEPTOR IL-22BP BOUND TO INTERLEUKIN-22         |
| 3GJX           | B A                    | A        | CRYSTAL STRUCTURE OF THE NUCLEAR EXPORT COMPLEX CRM1- SNURPORTIN1-RANGTP              |
| 3GJX           | B A                    | B        | CRYSTAL STRUCTURE OF THE NUCLEAR EXPORT COMPLEX CRM1- SNURPORTIN1-RANGTP              |
| 3GJX           | E D                    | D        | CRYSTAL STRUCTURE OF THE NUCLEAR EXPORT COMPLEX CRM1- SNURPORTIN1-RANGTP              |
| 3H6P           | A C                    | C        | CRYSTAL STRUCTURE OF RV3019C-RV3020C FROM MYCOBACTERIUM TUBERCULOSIS                  |
| 3HHR           | A C                    | A        | HUMAN GROWTH HORMONE AND EXTRACELLULAR DOMAIN OF ITS RECEPTOR: CRYSTAL STRUCTURE (    |
| 3HJW           | A B                    | B        | STRUCTURE OF A FUNCTIONAL RIBONUCLEOPROTEIN PSEUDOURIDINE SYNTHASE BOUND TO A SUBSTI  |

TABLE S3

Jochim, et al

| A. PDB<br>CODE | E. FUNCTION                           | F. $\Delta\Delta G_{\text{AVG,HELIX}}$<br>(KCAL/MOL) | G. $\Delta\Delta G_{\text{SUM,HELIX}}$<br>(KCAL/MOL) | H. $\Delta\Delta G_{\text{SUM,CHAIN}}$<br>(KCAL/MOL) | I. HELIX<br>CONTRIBUTION |
|----------------|---------------------------------------|------------------------------------------------------|------------------------------------------------------|------------------------------------------------------|--------------------------|
| 3DCG           | LIGASE/VIRAL PROTEIN                  | 2.0                                                  | 3.9                                                  | 7.9                                                  | 49%                      |
| 3DD7           | RIBOSOME INHIBITOR                    | 4.9                                                  | 24.4                                                 | 26.6                                                 | 92%                      |
| 3DI2           | CYTOKINE/CYTOKINE RECEPTOR            | 2.4                                                  | 9.7                                                  | 13.5                                                 | 72%                      |
| 3DI2           | CYTOKINE/CYTOKINE RECEPTOR            | 2.1                                                  | 6.4                                                  | 9.2                                                  | 70%                      |
| 3DVE           | MEMBRANE PROTEIN                      | 2.6                                                  | 18.1                                                 | 20.0                                                 | 91%                      |
| 3DVU           | VIRAL PROTEIN/APOPTOSIS               | 2.0                                                  | 7.9                                                  | 9.1                                                  | 87%                      |
| 3E95           | LIGASE                                | 2.2                                                  | 11.2                                                 | 11.2                                                 | 100%                     |
| 3EAB           | CELL CYCLE                            | 2.8                                                  | 8.3                                                  | 9.6                                                  | 86%                      |
| 3EAB           | CELL CYCLE                            | 2.1                                                  | 10.6                                                 | 12.1                                                 | 88%                      |
| 3EX7           | HYDROLASE/RNA BINDING PROTEIN/RNA     | 2.4                                                  | 12.1                                                 | 14.7                                                 | 82%                      |
| 3EX7           | HYDROLASE/RNA BINDING PROTEIN/RNA     | 2.7                                                  | 10.6                                                 | 10.6                                                 | 100%                     |
| 3EZQ           | APOPTOSIS                             | 2.6                                                  | 7.7                                                  | 9.2                                                  | 84%                      |
| 3FAL           | SIGNALING PROTEIN                     | 2.0                                                  | 3.9                                                  | 6.2                                                  | 63%                      |
| 3FWB           | CELL CYCLE, TRANSCRIPTION             | 3.3                                                  | 19.9                                                 | 19.9                                                 | 100%                     |
| 3G9V           | CYTOKINE/CYTOKINE RECEPTOR            | 2.2                                                  | 4.3                                                  | 8.6                                                  | 50%                      |
| 3GJX           | PROTEIN TRANSPORT                     | 2.7                                                  | 5.3                                                  | 13.1                                                 | 40%                      |
| 3GJX           | PROTEIN TRANSPORT                     | 2.1                                                  | 8.3                                                  | 14.9                                                 | 56%                      |
| 3GJX           | PROTEIN TRANSPORT                     | 2.0                                                  | 3.9                                                  | 9.7                                                  | 40%                      |
| 3H6P           | STRUCTURAL GENOMICS, UNKNOWN FUNCTION | 2.1                                                  | 6.4                                                  | 7.5                                                  | 85%                      |
| 3HHR           | HORMONE/RECEPTOR                      | 2.1                                                  | 8.3                                                  | 8.3                                                  | 100%                     |
| 3HJW           | ISOMERASE/RNA                         | 2.1                                                  | 8.3                                                  | 18.7                                                 | 44%                      |

TABLE S3

| A. PDB<br>CODE | J. # HOTSPOT<br>RESIDUES | K. HOTSPOT RESIDUES, RESIDUE #, $\Delta\Delta G$ (KCAL/MOL)                         |
|----------------|--------------------------|-------------------------------------------------------------------------------------|
| 3DCG           | 2                        | H68, 2.6; M75, 1.3;                                                                 |
| 3DD7           | 5                        | E55, 1.6; F56, 2.6; L59, 2.0; F60, 17.0; D61, 1.2;                                  |
| 3DI2           | 4                        | K10, 3.2; V15, 1.8; L16, 3.3; V18, 1.4;                                             |
| 3DI2           | 3                        | D74, 1.0; L77, 1.4; L80, 4.0;                                                       |
| 3DVE           | 7                        | M1854, 1.5; K1856, 1.6; I1863, 3.1; F1864, 1.9; F1866, 3.9; Y1867, 4.3; K1868, 1.8; |
| 3DVU           | 4                        | L112, 1.9; L116, 1.6; D121, 1.2; F123, 3.2;                                         |
| 3E95           | 5                        | F28, 5.1; L31, 1.3; D32, 1.6; L34, 2.2; Q38, 1.0;                                   |
| 3EAB           | 3                        | R117, 1.5; H120, 2.1; F124, 4.7;                                                    |
| 3EAB           | 5                        | E184, 2.9; Q185, 3.7; D186, 1.1; L188, 1.9; R191, 1.0;                              |
| 3EX7           | 5                        | Y124, 2.1; D128, 1.7; S135, 2.4; L139, 1.9; H140, 4.0;                              |
| 3EX7           | 4                        | R387, 2.0; R390, 4.5; D391, 2.2; Q394, 1.9;                                         |
| 3EZQ           | 3                        | Y291, 2.2; I295, 4.5; T305, 1.0;                                                    |
| 3FAL           | 2                        | L400, 1.4; R413, 2.5;                                                               |
| 3FWB           | 6                        | K789, 1.7; L794, 1.0; K795, 3.5; F798, 1.3; F799, 4.1; W802, 8.3;                   |
| 3G9V           | 2                        | P50, 1.4; F57, 2.9;                                                                 |
| 3GJX           | 2                        | F561, 2.4; K568, 2.9;                                                               |
| 3GJX           | 4                        | M1, 1.5; E2, 1.1; L4, 2.9; L8, 2.8;                                                 |
| 3GJX           | 2                        | V518, 1.2; L525, 2.7;                                                               |
| 3H6P           | 3                        | Y21, 3.0; L25, 1.2; I32, 2.2;                                                       |
| 3HHR           | 4                        | D11, 2.1; N12, 2.0; R16, 1.9; R8, 2.3;                                              |
| 3HJW           | 4                        | R45, 2.8; R46, 2.3; K49, 1.7; R50, 1.5;                                             |

TABLE S3

Jochim, et al

| A. PDB<br>CODE | L. HOTSPOT RESIDUE HELIX POSITIONS   | M. HOTSPOT RESIDUE<br>END TO END LENGTH | N. HELIX<br>LENGTH | O. HELIX START<br>RESIDUE # | P. HELIX END<br>RESIDUE # |
|----------------|--------------------------------------|-----------------------------------------|--------------------|-----------------------------|---------------------------|
| 3DCG           | i; i+7;                              | 8                                       | 17                 | 67                          | 83                        |
| 3DD7           | i; i+1; i+4; i+5; i+6;               | 7                                       | 11                 | 53                          | 63                        |
| 3DI2           | i; i+5; i+6; i+8;                    | 9                                       | 18                 | 9                           | 26                        |
| 3DI2           | i; i+3; i+6;                         | 7                                       | 18                 | 74                          | 123                       |
| 3DVE           | i; i+2; i+9; i+10; i+12; i+13; i+14; | 15                                      | 17                 | 1854                        | 1870                      |
| 3DVU           | i; i+4; i+9; i+11;                   | 12                                      | 18                 | 108                         | 125                       |
| 3E95           | i; i+3; i+4; i+6; i+10;              | 11                                      | 15                 | 26                          | 40                        |
| 3EAB           | i; i+3; i+7;                         | 8                                       | 28                 | 110                         | 137                       |
| 3EAB           | i; i+1; i+2; i+4; i+7;               | 8                                       | 19                 | 174                         | 192                       |
| 3EX7           | i; i+4; i+11; i+15; i+16;            | 17                                      | 27                 | 116                         | 142                       |
| 3EX7           | i; i+3; i+4; i+7;                    | 8                                       | 12                 | 385                         | 396                       |
| 3EZQ           | i; i+4; i+14;                        | 15                                      | 32                 | 287                         | 318                       |
| 3FAL           | i; i+13;                             | 14                                      | 30                 | 399                         | 428                       |
| 3FWB           | i; i+5; i+6; i+9; i+10; i+13;        | 14                                      | 52                 | 753                         | 804                       |
| 3G9V           | i; i+7;                              | 8                                       | 17                 | 50                          | 66                        |
| 3GJX           | i; i+7;                              | 8                                       | 14                 | 559                         | 572                       |
| 3GJX           | i; i+1; i+3; i+7;                    | 8                                       | 11                 | 0                           | 10                        |
| 3GJX           | i; i+7;                              | 8                                       | 22                 | 510                         | 531                       |
| 3H6P           | i; i+4; i+11;                        | 12                                      | 19                 | 21                          | 39                        |
| 3HHR           | i; i+3; i+4; i+8;                    | 9                                       | 28                 | 6                           | 33                        |
| 3HJW           | i; i+1; i+4; i+5;                    | 6                                       | 12                 | 42                          | 53                        |

TABLE S3

Jochim, et al

| A. PDB<br>CODE | Q. HELIX SEQUENCE                                    | R. RESOLUTION |
|----------------|------------------------------------------------------|---------------|
| 3DCG           | SHVLSKVCMYFTYKVRY                                    | 2.40          |
| 3DD7           | DAEFASLFDL                                           | 1.70          |
| 3DI2           | GKQYESVLMVSIQLLDS                                    | 2.70          |
| 3DI2           | DFDLHLLKVSEGTTILLK                                   | 2.70          |
| 3DVE           | MGKVYAALMIFDFYKQN                                    | 2.35          |
| 3DVU           | TMENLSRRLKVTGDLFDI                                   | 2.50          |
| 3E95           | RSFRLLDELERGQKG                                      | 2.50          |
| 3EAB           | SMEAERVRVFKQAFEYISIALRIDEDE                          | 2.50          |
| 3EAB           | GSVGTSVASAEQDELSQRL                                  | 2.50          |
| 3EX7           | PEGLRVFYLVQDLKCLVFLIGLHFK                            | 2.30          |
| 3EX7           | DIRILRDIEQYY                                         | 2.30          |
| 3EZQ           | KKEAYDTLIKDLKKNLCTLAEKIQTILKDI                       | 2.73          |
| 3FAL           | PLMFPRMLMKLVSLRTLSSVHSEQVFALRL                       | 2.36          |
| 3FWB           | EANYRKDFIDTMTRELYDAFLHERLYLIYMDSRAELKRNSTLKKKFFEKWQA | 2.50          |
| 3G9V           | PYITNRTFMLAKEASLA                                    | 2.76          |
| 3GJX           | WKFLKTVVKNLFEF                                       | 2.50          |
| 3GJX           | SMEELSQUALAS                                         | 2.50          |
| 3GJX           | EEDEKRFLVTVIKDLLGLCEQK                               | 2.50          |
| 3H6P           | YAGTLQSLGADIASEQAVL                                  | 1.91          |
| 3HRH           | LSRLFDNAMLRAHRLHQLAFDITYQEFEE                        | 2.80          |
| 3HJW           | GEYRRRWKREVL                                         | 2.35          |

**Table S4.** Dataset of Weak Interface HIPP interactions

## Description of Entries

- A. PDB code of predicted target.
- B. Chains in the complex featuring a helix at the interface.
- C. Candidate helix to be mimicked is part of the indicated chain.
- D. Title of PDB entry.
- E. Function of protein complex.
- F.  $\Delta\Delta G_{\text{avg}}/\text{helix}$  is derived from Rosetta computational alanine mutagenesis studies and indicates the average free energy penalty for mutating two or more key residues in the helix at the interface to alanine.
- G.  $\Delta\Delta G_{\text{sum}}/\text{helix}$  is derived from Rosetta computational alanine mutagenesis studies and indicates the average free energy penalty for mutating two or more key residues at the interface to alanine.
- H. Number of hot spot residues in helix.
- I. Length of candidate helix to be mimicked
- J. First residue of the candidate helix segment.
- K. Last residue of the candidate helix segment.
- L. Sequence of candidate helix to be mimicked.
- M. Resolution of PDB structure (NOT APP indicates NMR structure).



| A. PDB CODE | B. INTERFACE CHAINS | C. CHAIN | D. TITLE                                                                               |
|-------------|---------------------|----------|----------------------------------------------------------------------------------------|
| 1A02        | F J                 | F        | STRUCTURE OF THE DNA BINDING DOMAINS OF NFAT, FOS AND JUN BOUND TO DNA                 |
| 1A02        | F J                 | J        | STRUCTURE OF THE DNA BINDING DOMAINS OF NFAT, FOS AND JUN BOUND TO DNA                 |
| 1A00        | C D                 | C        | CHEY-BINDING DOMAIN OF CHEA IN COMPLEX WITH CHEY                                       |
| 1A93        | AB                  | A        | NMR SOLUTION STRUCTURE OF THE C-MYC-MAX HETERODIMERIC LEUCINE ZIPPER, NMR, MINIMIZED   |
| 1A9N        | C D                 | D        | CRYSTAL STRUCTURE OF THE SPLICEOSOMAL U2B''-U2A' PROTEIN COMPLEX BOUND TO A FRAGMENT C |
| 1AGR        | AE                  | A        | COMPLEX OF ALF4-ACTIVATED GI-ALPHA-1 WITH RGS4                                         |
| 1AGR        | DH                  | H        | COMPLEX OF ALF4-ACTIVATED GI-ALPHA-1 WITH RGS4                                         |
| 1AKH        | AB                  | B        | MAT A1/ALPHA2/DNA TERNARY COMPLEX                                                      |
| 1AOK        | AB                  | B        | VIPOXIN COMPLEX                                                                        |
| 1APY        | CB                  | B        | HUMAN ASPARTYLGLUCOSAMINIDASE                                                          |
| 1APY        | CD                  | C        | HUMAN ASPARTYLGLUCOSAMINIDASE                                                          |
| 1AVO        | AB                  | A        | PROTEASOME ACTIVATOR REG(ALPHA)                                                        |
| 1AVO        | AB                  | B        | PROTEASOME ACTIVATOR REG(ALPHA)                                                        |
| 1AVO        | CD                  | D        | PROTEASOME ACTIVATOR REG(ALPHA)                                                        |
| 1AVO        | GH                  | H        | PROTEASOME ACTIVATOR REG(ALPHA)                                                        |
| 1AVO        | IJ                  | J        | PROTEASOME ACTIVATOR REG(ALPHA)                                                        |
| 1AVO        | KL                  | K        | PROTEASOME ACTIVATOR REG(ALPHA)                                                        |
| 1AVO        | KL                  | L        | PROTEASOME ACTIVATOR REG(ALPHA)                                                        |
| 1AVO        | KL                  | L        | PROTEASOME ACTIVATOR REG(ALPHA)                                                        |
| 1AVO        | MN                  | N        | PROTEASOME ACTIVATOR REG(ALPHA)                                                        |
| 1AWC        | AB                  | A        | MOUSE GABP ALPHA/BETA DOMAIN BOUND TO DNA                                              |
| 1AWC        | AB                  | A        | MOUSE GABP ALPHA/BETA DOMAIN BOUND TO DNA                                              |
| 1AWC        | AB                  | B        | MOUSE GABP ALPHA/BETA DOMAIN BOUND TO DNA                                              |
| 1AYY        | AB                  | A        | GLYCOSYLSPARAGINASE                                                                    |
| 1AYY        | CD                  | C        | GLYCOSYLSPARAGINASE                                                                    |
| 1B4U        | AB                  | A        | PROTOCATECHUATE 4,5-DIOXYGENASE (LIGAB) IN COMPLEX WITH PROTOCATECHUATE (PCA)          |
| 1B4U        | AB                  | A        | PROTOCATECHUATE 4,5-DIOXYGENASE (LIGAB) IN COMPLEX WITH PROTOCATECHUATE (PCA)          |
| 1B4U        | AB                  | A        | PROTOCATECHUATE 4,5-DIOXYGENASE (LIGAB) IN COMPLEX WITH PROTOCATECHUATE (PCA)          |
| 1B4U        | AB                  | B        | PROTOCATECHUATE 4,5-DIOXYGENASE (LIGAB) IN COMPLEX WITH PROTOCATECHUATE (PCA)          |
| 1B4U        | AD                  | D        | PROTOCATECHUATE 4,5-DIOXYGENASE (LIGAB) IN COMPLEX WITH PROTOCATECHUATE (PCA)          |
| 1B4U        | CD                  | C        | PROTOCATECHUATE 4,5-DIOXYGENASE (LIGAB) IN COMPLEX WITH PROTOCATECHUATE (PCA)          |
| 1B4U        | CD                  | D        | PROTOCATECHUATE 4,5-DIOXYGENASE (LIGAB) IN COMPLEX WITH PROTOCATECHUATE (PCA)          |
| 1B6C        | AB                  | B        | CRYSTAL STRUCTURE OF THE CYTOPLASMIC DOMAIN OF THE TYPE 1 TGF-BETA RECEPTOR IN COMPLE  |
| 1B6C        | AB                  | B        | CRYSTAL STRUCTURE OF THE CYTOPLASMIC DOMAIN OF THE TYPE 1 TGF-BETA RECEPTOR IN COMPLE  |
| 1B9X        | AB                  | A        | STRUCTURAL ANALYSIS OF PHOSDUCIN AND ITS PHOSPHORYLATION- REGULATED INTERACTION WITH   |
| 1B9X        | AC                  | C        | STRUCTURAL ANALYSIS OF PHOSDUCIN AND ITS PHOSPHORYLATION- REGULATED INTERACTION WITH   |
| 1BB1        | AB                  | A        | CRYSTAL STRUCTURE OF A DESIGNED, THERMOSTABLE HETEROTRIMERIC COILED COIL               |
| 1BB1        | AC                  | A        | CRYSTAL STRUCTURE OF A DESIGNED, THERMOSTABLE HETEROTRIMERIC COILED COIL               |
| 1BB1        | AC                  | C        | CRYSTAL STRUCTURE OF A DESIGNED, THERMOSTABLE HETEROTRIMERIC COILED COIL               |
| 1BB1        | BC                  | C        | CRYSTAL STRUCTURE OF A DESIGNED, THERMOSTABLE HETEROTRIMERIC COILED COIL               |
| 1BCC        | AB                  | B        | CYTOCHROME BC1 COMPLEX FROM CHICKEN                                                    |
| 1BCC        | DF                  | F        | CYTOCHROME BC1 COMPLEX FROM CHICKEN                                                    |
| 1BCC        | DJ                  | D        | CYTOCHROME BC1 COMPLEX FROM CHICKEN                                                    |
| 1BCC        | DJ                  | J        | CYTOCHROME BC1 COMPLEX FROM CHICKEN                                                    |
| 1BCC        | EJ                  | E        | CYTOCHROME BC1 COMPLEX FROM CHICKEN                                                    |
| 1BCC        | EJ                  | J        | CYTOCHROME BC1 COMPLEX FROM CHICKEN                                                    |
| 1BCC        | GH                  | H        | CYTOCHROME BC1 COMPLEX FROM CHICKEN                                                    |
| 1BCP        | AE                  | A        | BINARY COMPLEX OF PERTUSSIS TOXIN AND ATP                                              |
| 1BCP        | BF                  | B        | BINARY COMPLEX OF PERTUSSIS TOXIN AND ATP                                              |
| 1BCP        | CE                  | C        | BINARY COMPLEX OF PERTUSSIS TOXIN AND ATP                                              |
| 1BCP        | EF                  | E        | BINARY COMPLEX OF PERTUSSIS TOXIN AND ATP                                              |
| 1BCP        | EF                  | F        | BINARY COMPLEX OF PERTUSSIS TOXIN AND ATP                                              |
| 1BCP        | IK                  | I        | BINARY COMPLEX OF PERTUSSIS TOXIN AND ATP                                              |
| 1BH8        | AB                  | A        | HTAFIII8/HTAFII28 HETERODIMER CRYSTAL STRUCTURE                                        |
| 1B14        | AB                  | A        | CATALYTIC DOMAIN OF HIV-1 INTEGRASE                                                    |
| 1B14        | AB                  | B        | CATALYTIC DOMAIN OF HIV-1 INTEGRASE                                                    |
| 1BIQ        | AB                  | A        | RIBONUCLEOSIDE-DIPHOSPHATE REDUCTASE 1 BETA CHAIN MUTANT E238A                         |
| 1BIQ        | AB                  | A        | RIBONUCLEOSIDE-DIPHOSPHATE REDUCTASE 1 BETA CHAIN MUTANT E238A                         |
| 1BIQ        | AB                  | A        | RIBONUCLEOSIDE-DIPHOSPHATE REDUCTASE 1 BETA CHAIN MUTANT E238A                         |
| 1BIQ        | AB                  | B        | RIBONUCLEOSIDE-DIPHOSPHATE REDUCTASE 1 BETA CHAIN MUTANT E238A                         |
| 1BP3        | AB                  | A        | THE XRAY STRUCTURE OF A GROWTH HORMONE-PROLACTIN RECEPTOR COMPLEX                      |
| 1BPL        | AB                  | A        | GLYCOSYLTRANSFERASE                                                                    |
| 1BPL        | AB                  | B        | GLYCOSYLTRANSFERASE                                                                    |

TABLE S4

Jochim, et al

| A. PDB<br>CODE | E. FUNCTION                             | F. $\Delta\Delta G_{\text{AVG,HELIX}}$<br>(KCAL/MOL) | G. $\Delta\Delta G_{\text{SUM,HELIX}}$<br>(KCAL/MOL) | H. # HOTSPOT<br>RESIDUES | I. HELIX<br>LENGTH |
|----------------|-----------------------------------------|------------------------------------------------------|------------------------------------------------------|--------------------------|--------------------|
| 1A02           | TRANSCRIPTION/DNA                       | 1.7                                                  | 9.9                                                  | 6                        | 52                 |
| 1A02           | TRANSCRIPTION/DNA                       | 1.5                                                  | 10.4                                                 | 7                        | 50                 |
| 1A00           | CHEMOTAXIS                              | 1.0                                                  | 2.0                                                  | 2                        | 11                 |
| 1A93           | LEUCINE ZIPPER                          | 1.4                                                  | 4.1                                                  | 3                        | 29                 |
| 1A9N           | RNA BINDING PROTEIN/RNA                 | 1.7                                                  | 5.0                                                  | 3                        | 12                 |
| 1AGR           | COMPLEX (SIGNAL TRANSDUCTION/REGULATOR) | 1.6                                                  | 4.7                                                  | 3                        | 10                 |
| 1AGR           | COMPLEX (SIGNAL TRANSDUCTION/REGULATOR) | 1.7                                                  | 3.3                                                  | 2                        | 15                 |
| 1AKH           | DNA BINDING PROTEIN/DNA                 | 1.6                                                  | 3.2                                                  | 2                        | 9                  |
| 1AOK           | HYDROLASE                               | 1.6                                                  | 4.8                                                  | 3                        | 13                 |
| 1APY           | HYDROLASE                               | 1.2                                                  | 2.3                                                  | 2                        | 7                  |
| 1APY           | HYDROLASE                               | 1.6                                                  | 3.1                                                  | 2                        | 13                 |
| 1AVO           | PROTEASOME ACTIVATOR                    | 1.8                                                  | 10.5                                                 | 6                        | 15                 |
| 1AVO           | PROTEASOME ACTIVATOR                    | 1.6                                                  | 6.2                                                  | 4                        | 32                 |
| 1AVO           | PROTEASOME ACTIVATOR                    | 1.5                                                  | 5.9                                                  | 4                        | 32                 |
| 1AVO           | PROTEASOME ACTIVATOR                    | 1.5                                                  | 7.4                                                  | 5                        | 32                 |
| 1AVO           | PROTEASOME ACTIVATOR                    | 1.6                                                  | 10.9                                                 | 7                        | 32                 |
| 1AVO           | PROTEASOME ACTIVATOR                    | 1.8                                                  | 14.2                                                 | 8                        | 38                 |
| 1AVO           | PROTEASOME ACTIVATOR                    | 1.6                                                  | 6.5                                                  | 4                        | 32                 |
| 1AVO           | PROTEASOME ACTIVATOR                    | 1.9                                                  | 7.4                                                  | 4                        | 39                 |
| 1AVO           | PROTEASOME ACTIVATOR                    | 1.5                                                  | 4.6                                                  | 3                        | 32                 |
| 1AWC           | TRANSCRIPTION/DNA                       | 1.1                                                  | 2.1                                                  | 2                        | 19                 |
| 1AWC           | TRANSCRIPTION/DNA                       | 1.5                                                  | 2.9                                                  | 2                        | 10                 |
| 1AWC           | TRANSCRIPTION/DNA                       | 1.9                                                  | 3.7                                                  | 2                        | 8                  |
| 1AYY           | HYDROLASE                               | 1.7                                                  | 5.0                                                  | 3                        | 15                 |
| 1AYY           | HYDROLASE                               | 1.5                                                  | 4.4                                                  | 3                        | 15                 |
| 1B4U           | DIOXYGENASE                             | 1.9                                                  | 3.8                                                  | 2                        | 10                 |
| 1B4U           | DIOXYGENASE                             | 1.4                                                  | 2.8                                                  | 2                        | 11                 |
| 1B4U           | DIOXYGENASE                             | 1.4                                                  | 4.2                                                  | 3                        | 10                 |
| 1B4U           | DIOXYGENASE                             | 1.6                                                  | 4.7                                                  | 3                        | 8                  |
| 1B4U           | DIOXYGENASE                             | 1.4                                                  | 4.2                                                  | 3                        | 14                 |
| 1B4U           | DIOXYGENASE                             | 1.6                                                  | 3.2                                                  | 2                        | 10                 |
| 1B4U           | DIOXYGENASE                             | 1.2                                                  | 4.9                                                  | 4                        | 8                  |
| 1B6C           | COMPLEX (ISOMERASE/PROTEIN KINASE)      | 1.8                                                  | 3.6                                                  | 2                        | 14                 |
| 1B6C           | COMPLEX (ISOMERASE/PROTEIN KINASE)      | 1.9                                                  | 7.5                                                  | 4                        | 10                 |
| 1B9X           | SIGNALING PROTEIN                       | 1.3                                                  | 3.9                                                  | 3                        | 22                 |
| 1B9X           | SIGNALING PROTEIN                       | 1.8                                                  | 7.0                                                  | 4                        | 13                 |
| 1BB1           | DE NOVO PROTEIN DESIGN                  | 1.4                                                  | 4.3                                                  | 3                        | 33                 |
| 1BB1           | DE NOVO PROTEIN DESIGN                  | 1.4                                                  | 4.1                                                  | 3                        | 33                 |
| 1BB1           | DE NOVO PROTEIN DESIGN                  | 1.6                                                  | 4.9                                                  | 3                        | 32                 |
| 1BB1           | DE NOVO PROTEIN DESIGN                  | 1.4                                                  | 5.6                                                  | 4                        | 32                 |
| 1BCC           | OXIDOREDUCTASE                          | 1.5                                                  | 3.0                                                  | 2                        | 17                 |
| 1BCC           | OXIDOREDUCTASE                          | 1.7                                                  | 5.1                                                  | 3                        | 20                 |
| 1BCC           | OXIDOREDUCTASE                          | 1.4                                                  | 4.3                                                  | 3                        | 35                 |
| 1BCC           | OXIDOREDUCTASE                          | 1.6                                                  | 3.2                                                  | 2                        | 23                 |
| 1BCC           | OXIDOREDUCTASE                          | 1.8                                                  | 3.5                                                  | 2                        | 35                 |
| 1BCC           | OXIDOREDUCTASE                          | 1.9                                                  | 3.7                                                  | 2                        | 23                 |
| 1BCC           | OXIDOREDUCTASE                          | 1.4                                                  | 2.8                                                  | 2                        | 23                 |
| 1BCP           | TOXIN                                   | 1.2                                                  | 2.4                                                  | 2                        | 21                 |
| 1BCP           | TOXIN                                   | 1.6                                                  | 3.2                                                  | 2                        | 13                 |
| 1BCP           | TOXIN                                   | 1.7                                                  | 6.9                                                  | 4                        | 13                 |
| 1BCP           | TOXIN                                   | 1.4                                                  | 2.7                                                  | 2                        | 13                 |
| 1BCP           | TOXIN                                   | 1.5                                                  | 4.5                                                  | 3                        | 16                 |
| 1BCP           | TOXIN                                   | 1.5                                                  | 6.1                                                  | 4                        | 14                 |
| 1BH8           | TRANSCRIPTION REGULATION COMPLEX        | 1.5                                                  | 7.6                                                  | 5                        | 25                 |
| 1B14           | DNA INTEGRATION                         | 1.4                                                  | 4.3                                                  | 3                        | 15                 |
| 1B14           | DNA INTEGRATION                         | 1.6                                                  | 3.1                                                  | 2                        | 14                 |
| 1BIQ           | OXIDOREDUCTASE                          | 1.4                                                  | 4.2                                                  | 3                        | 13                 |
| 1BIQ           | OXIDOREDUCTASE                          | 1.9                                                  | 9.4                                                  | 5                        | 27                 |
| 1BIQ           | OXIDOREDUCTASE                          | 1.6                                                  | 3.2                                                  | 2                        | 11                 |
| 1BIQ           | OXIDOREDUCTASE                          | 1.9                                                  | 7.7                                                  | 4                        | 19                 |
| 1BP3           | HORMONE/GROWTH FACTOR                   | 1.6                                                  | 7.9                                                  | 5                        | 31                 |
| 1BPL           | GLYCOSYLTRANSFERASE                     | 1.4                                                  | 4.3                                                  | 3                        | 14                 |
| 1BPL           | GLYCOSYLTRANSFERASE                     | 1.5                                                  | 3.0                                                  | 2                        | 13                 |

TABLE S4

Jochim, et al

| A. PDB<br>CODE | J. HELIX START<br>RESIDUE # | K. HELIX END<br>RESIDUE # |
|----------------|-----------------------------|---------------------------|
| 1A02           | 141                         | 192                       |
| 1A02           | 268                         | 317                       |
| 1A00           | 92                          | 102                       |
| 1A93           | 6                           | 34                        |
| 1A9N           | 23                          | 34                        |
| 1AGR           | 205                         | 214                       |
| 1AGR           | 86                          | 100                       |
| 1AKH           | 194                         | 202                       |
| 1AOK           | 2                           | 14                        |
| 1APY           | 237                         | 243                       |
| 1APY           | 126                         | 138                       |
| 1AVO           | 31                          | 45                        |
| 1AVO           | 108                         | 139                       |
| 1AVO           | 108                         | 139                       |
| 1AVO           | 108                         | 139                       |
| 1AVO           | 108                         | 139                       |
| 1AVO           | 8                           | 45                        |
| 1AVO           | 108                         | 139                       |
| 1AVO           | 195                         | 233                       |
| 1AVO           | 108                         | 139                       |
| 1AWC           | 411                         | 429                       |
| 1AWC           | 322                         | 331                       |
| 1AWC           | 107                         | 114                       |
| 1AYY           | 31                          | 45                        |
| 1AYY           | 31                          | 45                        |
| 1B4U           | 10                          | 19                        |
| 1B4U           | 89                          | 99                        |
| 1B4U           | 35                          | 44                        |
| 1B4U           | 229                         | 236                       |
| 1B4U           | 100                         | 113                       |
| 1B4U           | 115                         | 124                       |
| 1B4U           | 229                         | 236                       |
| 1B6C           | 239                         | 252                       |
| 1B6C           | 195                         | 204                       |
| 1B9X           | 4                           | 25                        |
| 1B9X           | 22                          | 34                        |
| 1BB1           | 2                           | 34                        |
| 1BB1           | 2                           | 34                        |
| 1BB1           | 3                           | 34                        |
| 1BB1           | 3                           | 34                        |
| 1BCC           | 355                         | 371                       |
| 1BCC           | 52                          | 71                        |
| 1BCC           | 199                         | 233                       |
| 1BCC           | 24                          | 46                        |
| 1BCC           | 25                          | 59                        |
| 1BCC           | 24                          | 46                        |
| 1BCC           | 55                          | 77                        |
| 1BCP           | 57                          | 77                        |
| 1BCP           | 146                         | 158                       |
| 1BCP           | 146                         | 158                       |
| 1BCP           | 63                          | 75                        |
| 1BCP           | 51                          | 66                        |
| 1BCP           | 146                         | 159                       |
| 1BH8           | 51                          | 75                        |
| 1B14           | 172                         | 186                       |
| 1B14           | 172                         | 185                       |
| 1BIQ           | 34                          | 46                        |
| 1BIQ           | 102                         | 128                       |
| 1BIQ           | 133                         | 143                       |
| 1BIQ           | 153                         | 171                       |
| 1BP3           | 155                         | 185                       |
| 1BPL           | 80                          | 93                        |
| 1BPL           | 381                         | 393                       |

| A. PDB<br>CODE | L. HELIX SEQUENCE                                   |
|----------------|-----------------------------------------------------|
| 1A02           | RIRRERNKMAAAKSRNRRRELDTLQAETDQLEDEKSALQTEIANLLKEKEK |
| 1A02           | KRMRNRIAASKSRKRKLERIARLEEKVKTLKAQNSELASTANMLREQVAQ  |
| 1A00           | KENIIAAAQAG                                         |
| 1A93           | VQAEEQKLISEEDLLRKRREQLKHKLEQL                       |
| 1A9N           | KEELKRSLYALF                                        |
| 1AGR           | RSERKKWIHC                                          |
| 1AGR           | EENIDFWISCEEYKK                                     |
| 1AKH           | PELADLLSG                                           |
| 1AOK           | LFQFAKMINGKLG                                       |
| 1APY           | GDILMRF                                             |
| 1APY           | SASQALHSDWLAR                                       |
| 1AVO           | SYFPPKISELDAFLK                                     |
| 1AVO           | EKIVVLLQRLKPEIKDVIEQLNLVTTWLQLQI                    |
| 1AVO           | EKIVVLLQRLKPEIKDVIEQLNLVTTWLQLQI                    |
| 1AVO           | EKIVVLLQRLKPEIKDVIEQLNLVTTWLQLQI                    |
| 1AVO           | EKIVVLLQRLKPEIKDVIEQLNLVTTWLQLQI                    |
| 1AVO           | PEAQAKVDVFREDLCTKTENLLGSYFPPKISELDAFLK              |
| 1AVO           | EKIVVLLQRLKPEIKDVIEQLNLVTTWLQLQI                    |
| 1AVO           | GDYRQLVHELDEAEYRDIRLMVMEIRNAYAVLYDILKN              |
| 1AVO           | EKIVVLLQRLKPEIKDVIEQLNLVTTWLQLQI                    |
| 1AWC           | AAELNRLVIECEQKKLARM                                 |
| 1AWC           | LWQFLELLT                                           |
| 1AWC           | ALHWATEH                                            |
| 1AYY           | ALDAVEKGVRLVEDD                                     |
| 1AYY           | ALDAVEKGVRLVEDD                                     |
| 1B4U           | VHAYLAEFDD                                          |
| 1B4U           | VYFLSKLFSTD                                         |
| 1B4U           | YNLNQFAMSL                                          |
| 1B4U           | HIQYLRES                                            |
| 1B4U           | PDLAWHIAQSLILD                                      |
| 1B4U           | QEEYAQMMID                                          |
| 1B4U           | HIQYLRES                                            |
| 1B6C           | ERSWFREAEIYQTV                                      |
| 1B6C           | LLVQRTIART                                          |
| 1B9X           | LDQLRQEAQELKNQIRDARKAC                              |
| 1B9X           | PKGVIINDWRKFKL                                      |
| 1BB1           | EIAAIEYEQAAIKEEIAAIKDIAAIEKYIAAI                    |
| 1BB1           | EIAAIEYEQAAIKEEIAAIKDIAAIEKYIAAI                    |
| 1BB1           | IAAIKYKQAAIKNEIAAIKQEIAAIEQMIAAI                    |
| 1BB1           | IAAIKYKQAAIKNEIAAIKQEIAAIEQMIAAI                    |
| 1BCC           | ENVQAANKLAKYLMS                                     |
| 1BCC           | ENLYDDRMFRIKRALDLNMR                                |
| 1BCC           | DHRKRMGLKMLLMMGLLVPLVYYMKRHKWSVLKSR                 |
| 1BCC           | IVVGALLFERAFDQGADAIYEHI                             |
| 1BCC           | SRESGPSRKGFSYLVTAVTTLGVAAYAAKNVVTQFV                |
| 1BCC           | IVVGALLFERAFDQGADAIYEHI                             |
| 1BCC           | TEELFDLHARDHCVAHKLFNSL                              |
| 1BCP           | RRYTEVYLEHRMQEAVEAERA                               |
| 1BCP           | YSRLRKMLYLIYV                                       |
| 1BCP           | YDALRRLLYMIYM                                       |
| 1BCP           | PMEVMLRAVFMQQ                                       |
| 1BCP           | TWFDTMLGFAISAYAL                                    |
| 1BCP           | YDALRRLLYMIYMS                                      |
| 1BH8           | TESVDILEDLVIEFITEMTHKAMSI                           |
| 1B14           | LKTAVQMAVFIHNNH                                     |
| 1B14           | LKTAVQMAVFIHNNH                                     |
| 1BIQ           | DIFEKLEIQLSF                                        |
| 1BIQ           | PELETWVETWAFSETHSRSFTHIIRN                          |
| 1BIQ           | PSVVFDIVTN                                          |
| 1BIQ           | ISSYYDELIEMTSYWHLLG                                 |
| 1BP3           | ALLKNYGLLYCFRKMDKVETFLRIVQCRSV                      |
| 1BPL           | KGELQSAIKSLHSR                                      |
| 1BPL           | KHKIEPILKARKQ                                       |

| A. PDB<br>CODE | M. RESOLUTION |
|----------------|---------------|
| 1A02           | 2.7           |
| 1A02           | 2.7           |
| 1A00           | 2.95          |
| 1A93           | NOT APP       |
| 1A9N           | 2.38          |
| 1AGR           | 2.8           |
| 1AGR           | 2.8           |
| 1AKH           | 2.5           |
| 1AOK           | 2             |
| 1APY           | 2             |
| 1APY           | 2             |
| 1AVO           | 2.8           |
| 1AVO           | 2.8           |
| 1AVO           | 2.8           |
| 1AVO           | 2.8           |
| 1AVO           | 2.8           |
| 1AVO           | 2.8           |
| 1AVO           | 2.8           |
| 1AVO           | 2.8           |
| 1AVO           | 2.8           |
| 1AWC           | 2.15          |
| 1AWC           | 2.15          |
| 1AWC           | 2.15          |
| 1AYY           | 2.32          |
| 1AYY           | 2.32          |
| 1B4U           | 2.2           |
| 1B4U           | 2.2           |
| 1B4U           | 2.2           |
| 1B4U           | 2.2           |
| 1B4U           | 2.2           |
| 1B4U           | 2.2           |
| 1B4U           | 2.2           |
| 1B4U           | 2.2           |
| 1B6C           | 2.6           |
| 1B6C           | 2.6           |
| 1B9X           | 3             |
| 1B9X           | 3             |
| 1BB1           | 1.8           |
| 1BB1           | 1.8           |
| 1BB1           | 1.8           |
| 1BB1           | 1.8           |
| 1BCC           | 3.16          |
| 1BCC           | 3.16          |
| 1BCC           | 3.16          |
| 1BCC           | 3.16          |
| 1BCC           | 3.16          |
| 1BCC           | 3.16          |
| 1BCC           | 3.16          |
| 1BCP           | 2.7           |
| 1BCP           | 2.7           |
| 1BCP           | 2.7           |
| 1BCP           | 2.7           |
| 1BCP           | 2.7           |
| 1BCP           | 2.7           |
| 1BCP           | 2.7           |
| 1BH8           | 3             |
| 1B14           | 2.5           |
| 1B14           | 2.5           |
| 1BIQ           | 2.05          |
| 1BIQ           | 2.05          |
| 1BIQ           | 2.05          |
| 1BIQ           | 2.05          |
| 1BP3           | 2.9           |
| 1BPL           | 2.2           |
| 1BPL           | 2.2           |

| A. PDB CODE | B. INTERFACE CHAINS | C. CHAIN | D. TITLE                                                                               |
|-------------|---------------------|----------|----------------------------------------------------------------------------------------|
| IBSX        | A X                 | X        | STRUCTURE AND SPECIFICITY OF NUCLEAR RECEPTOR-COACTIVATOR INTERACTIONS                 |
| IBSX        | B Y                 | Y        | STRUCTURE AND SPECIFICITY OF NUCLEAR RECEPTOR-COACTIVATOR INTERACTIONS                 |
| IBTH        | J K                 | J        | STRUCTURE OF THROMBIN COMPLEXED WITH BOVINE PANCREATIC TRYPSIN INHIBITOR               |
| IBUH        | A B                 | A        | CRYSTAL STRUCTURE OF THE HUMAN CDK2 KINASE COMPLEX WITH CELL CYCLE-REGULATORY PROTI    |
| IBVK        | D F                 | F        | HUMANIZED ANTI-LYSOZYME FV COMPLEXED WITH LYSOZYME                                     |
| IBVY        | A F                 | F        | COMPLEX OF THE HEME AND FMN-BINDING DOMAINS OF THE CYTOCHROME P450(BM-3)               |
| IBX2        | A C                 | A        | CRYSTAL STRUCTURE OF HLA-DR2 (DRA*0101,DRB1*1501) COMPLEXED WITH A PEPTIDE FROM HUMAN  |
| IBX2        | B C                 | B        | CRYSTAL STRUCTURE OF HLA-DR2 (DRA*0101,DRB1*1501) COMPLEXED WITH A PEPTIDE FROM HUMAN  |
| IBX2        | D E                 | D        | CRYSTAL STRUCTURE OF HLA-DR2 (DRA*0101,DRB1*1501) COMPLEXED WITH A PEPTIDE FROM HUMAN  |
| IBX2        | D E                 | E        | CRYSTAL STRUCTURE OF HLA-DR2 (DRA*0101,DRB1*1501) COMPLEXED WITH A PEPTIDE FROM HUMAN  |
| IBX2        | E F                 | E        | CRYSTAL STRUCTURE OF HLA-DR2 (DRA*0101,DRB1*1501) COMPLEXED WITH A PEPTIDE FROM HUMAN  |
| ICOG        | S A                 | S        | CRYSTAL STRUCTURE OF 1:1 COMPLEX BETWEEN GELSOLIN SEGMENT 1 AND A DICTYOSTELIUM/TETR   |
| ICAX        | E B                 | E        | DETERMINATION OF THREE CRYSTAL STRUCTURES OF CANAVALLIN BY MOLECULAR REPLACEMENT       |
| ICB7        | A B                 | A        | GLUTAMATE MUTASE FROM CLOSTRIDIUM COCHLEARIUM RECONSTITUTED WITH METHYL-COBALAM        |
| ICB7        | A B                 | A        | GLUTAMATE MUTASE FROM CLOSTRIDIUM COCHLEARIUM RECONSTITUTED WITH METHYL-COBALAM        |
| ICB7        | C D                 | C        | GLUTAMATE MUTASE FROM CLOSTRIDIUM COCHLEARIUM RECONSTITUTED WITH METHYL-COBALAM        |
| ICC0        | A E                 | A        | CRYSTAL STRUCTURE OF THE RHOA.GDP-RHO GDI COMPLEX                                      |
| ICDL        | A E                 | A        | TARGET ENZYME RECOGNITION BY CALMODULIN: 2.4 ANGSTROMS STRUCTURE OF A CALMODULIN-PE    |
| ICDL        | A E                 | A        | TARGET ENZYME RECOGNITION BY CALMODULIN: 2.4 ANGSTROMS STRUCTURE OF A CALMODULIN-PE    |
| ICDL        | A E                 | A        | TARGET ENZYME RECOGNITION BY CALMODULIN: 2.4 ANGSTROMS STRUCTURE OF A CALMODULIN-PE    |
| ICDL        | A E                 | A        | TARGET ENZYME RECOGNITION BY CALMODULIN: 2.4 ANGSTROMS STRUCTURE OF A CALMODULIN-PE    |
| ICDL        | B F                 | B        | TARGET ENZYME RECOGNITION BY CALMODULIN: 2.4 ANGSTROMS STRUCTURE OF A CALMODULIN-PE    |
| ICDL        | B F                 | B        | TARGET ENZYME RECOGNITION BY CALMODULIN: 2.4 ANGSTROMS STRUCTURE OF A CALMODULIN-PE    |
| ICDL        | D G                 | G        | TARGET ENZYME RECOGNITION BY CALMODULIN: 2.4 ANGSTROMS STRUCTURE OF A CALMODULIN-PE    |
| ICDL        | D H                 | D        | TARGET ENZYME RECOGNITION BY CALMODULIN: 2.4 ANGSTROMS STRUCTURE OF A CALMODULIN-PE    |
| ICDL        | D H                 | D        | TARGET ENZYME RECOGNITION BY CALMODULIN: 2.4 ANGSTROMS STRUCTURE OF A CALMODULIN-PE    |
| ICDL        | D H                 | H        | TARGET ENZYME RECOGNITION BY CALMODULIN: 2.4 ANGSTROMS STRUCTURE OF A CALMODULIN-PE    |
| ICFF        | A B                 | A        | NMR SOLUTION STRUCTURE OF A COMPLEX OF CALMODULIN WITH A BINDING PEPTIDE OF THE CA2+-I |
| ICFF        | A B                 | A        | NMR SOLUTION STRUCTURE OF A COMPLEX OF CALMODULIN WITH A BINDING PEPTIDE OF THE CA2+-I |
| ICFF        | A B                 | A        | NMR SOLUTION STRUCTURE OF A COMPLEX OF CALMODULIN WITH A BINDING PEPTIDE OF THE CA2+-I |
| IC16        | A B                 | A        | TRANSCRIPTION FACTOR ATF4-C/EBP BETA BZIP HETERODIMER                                  |
| ICM1        | A B                 | A        | MOTIONS OF CALMODULIN-SINGLE-CONFORMER REFINEMENT                                      |
| ICM1        | A B                 | B        | MOTIONS OF CALMODULIN-SINGLE-CONFORMER REFINEMENT                                      |
| ICP9        | A B                 | A        | CRYSTAL STRUCTURE OF PENICILLIN G ACYLASE FROM THE BRO1 MUTANT STRAIN OF PROVIDENCIA F |
| ICP9        | A B                 | A        | CRYSTAL STRUCTURE OF PENICILLIN G ACYLASE FROM THE BRO1 MUTANT STRAIN OF PROVIDENCIA F |
| ICP9        | A B                 | A        | CRYSTAL STRUCTURE OF PENICILLIN G ACYLASE FROM THE BRO1 MUTANT STRAIN OF PROVIDENCIA F |
| ICP9        | A B                 | A        | CRYSTAL STRUCTURE OF PENICILLIN G ACYLASE FROM THE BRO1 MUTANT STRAIN OF PROVIDENCIA F |
| ICSE        | E I                 | E        | THE HIGH-RESOLUTION X-RAY CRYSTAL STRUCTURE OF THE COMPLEX FORMED BETWEEN SUBTILISIN   |
| ICUL        | A B                 | B        | COMPLEX OF GS-ALPHA WITH THE CATALYTIC DOMAINS OF MAMMALIAN ADENYLYL CYCLASE: COMP     |
| ICUL        | B C                 | B        | COMPLEX OF GS-ALPHA WITH THE CATALYTIC DOMAINS OF MAMMALIAN ADENYLYL CYCLASE: COMP     |
| ICXZ        | A B                 | B        | CRYSTAL STRUCTURE OF HUMAN RHOA COMPLEXED WITH THE EFFECTOR DOMAIN OF THE PROTEIN K    |
| 1D2Z        | A B                 | A        | THREE-DIMENSIONAL STRUCTURE OF A COMPLEX BETWEEN THE DEATH DOMAINS OF PELLE AND TUB    |
| 1D2Z        | C B                 | C        | THREE-DIMENSIONAL STRUCTURE OF A COMPLEX BETWEEN THE DEATH DOMAINS OF PELLE AND TUB    |
| 1D2Z        | C D                 | C        | THREE-DIMENSIONAL STRUCTURE OF A COMPLEX BETWEEN THE DEATH DOMAINS OF PELLE AND TUB    |
| 1D3B        | C D                 | C        | CRYSTAL STRUCTURE OF THE D3B SUBCOMPLEX OF THE HUMAN CORE SNRNP DOMAIN AT 2.0A RESOLI  |
| 1D8D        | A B                 | A        | CO-CRYSTAL STRUCTURE OF RAT PROTEIN FARNESYLTRANSFERASE COMPLEXED WITH A K-RAS4B PEP   |
| 1D8D        | A B                 | A        | CO-CRYSTAL STRUCTURE OF RAT PROTEIN FARNESYLTRANSFERASE COMPLEXED WITH A K-RAS4B PEP   |
| 1D8D        | A B                 | B        | CO-CRYSTAL STRUCTURE OF RAT PROTEIN FARNESYLTRANSFERASE COMPLEXED WITH A K-RAS4B PEP   |
| 1DAN        | L H                 | H        | COMPLEX OF ACTIVE SITE INHIBITED HUMAN BLOOD COAGULATION FACTOR VIIIA WITH HUMAN RECC  |
| 1DE4        | A C                 | A        | HEMOCHROMATOSIS PROTEIN HFE COMPLEXED WITH TRANSFERRIN RECEPTOR                        |
| 1DE4        | A C                 | C        | HEMOCHROMATOSIS PROTEIN HFE COMPLEXED WITH TRANSFERRIN RECEPTOR                        |
| 1DE4        | D F                 | D        | HEMOCHROMATOSIS PROTEIN HFE COMPLEXED WITH TRANSFERRIN RECEPTOR                        |
| 1DEV        | A B                 | B        | CRYSTAL STRUCTURE OF SMAD2 MH2 DOMAIN BOUND TO THE SMAD- BINDING DOMAIN OF SARA        |
| 1DKD        | C G                 | C        | CRYSTAL STRUCTURE OF A GROEL (APICAL DOMAIN) AND A DODECAMERIC PEPTIDE COMPLEX         |
| 1DKF        | A B                 | B        | CRYSTAL STRUCTURE OF A HETERODIMERIC COMPLEX OF RAR AND RXR LIGAND-BINDING DOMAINS     |
| 1DKF        | A B                 | B        | CRYSTAL STRUCTURE OF A HETERODIMERIC COMPLEX OF RAR AND RXR LIGAND-BINDING DOMAINS     |
| 1DKG        | A D                 | D        | CRYSTAL STRUCTURE OF THE NUCLEOTIDE EXCHANGE FACTOR GRPE BOUND TO THE ATPASE DOMAIN    |
| 1DML        | A F                 | F        | CRYSTAL STRUCTURE OF HERPES SIMPLEX UL42 BOUND TO THE C- TERMINUS OF HSV POL           |
| 1DML        | E F                 | F        | CRYSTAL STRUCTURE OF HERPES SIMPLEX UL42 BOUND TO THE C- TERMINUS OF HSV POL           |
| 1DML        | G H                 | H        | CRYSTAL STRUCTURE OF HERPES SIMPLEX UL42 BOUND TO THE C- TERMINUS OF HSV POL           |
| 1DOW        | A B                 | A        | CRYSTAL STRUCTURE OF A CHIMERA OF BETA-CATENIN AND ALPHA- CATENIN                      |
| 1DOW        | A B                 | B        | CRYSTAL STRUCTURE OF A CHIMERA OF BETA-CATENIN AND ALPHA- CATENIN                      |
| 1DS6        | A B                 | B        | CRYSTAL STRUCTURE OF A RAC-RHO GDI COMPLEX                                             |

TABLE S4

Jochim, et al

| A. PDB<br>CODE | E. FUNCTION                              | F. $\Delta\Delta G_{\text{AVG,HELIX}}$<br>(KCAL/MOL) | G. $\Delta\Delta G_{\text{SUM,HELIX}}$<br>(KCAL/MOL) | H. # HOTSPOT<br>RESIDUES | I. HELIX<br>LENGTH |
|----------------|------------------------------------------|------------------------------------------------------|------------------------------------------------------|--------------------------|--------------------|
| IBSX           | HORMONE/GROWTH FACTOR                    | 1.5                                                  | 4.6                                                  | 3                        | 6                  |
| IBSX           | HORMONE/GROWTH FACTOR                    | 1.5                                                  | 4.6                                                  | 3                        | 6                  |
| 1BTH           | COMPLEX (SERINE PROTEASE/INHIBITOR)      | 1.7                                                  | 6.9                                                  | 4                        | 9                  |
| IBUH           | TRANSFERASE                              | 1.6                                                  | 4.7                                                  | 3                        | 12                 |
| IBVK           | COMPLEX (HUMANIZED ANTIBODY/HYDROLASE)   | 1.6                                                  | 3.1                                                  | 2                        | 6                  |
| IBVY           | OXIDOREDUCTASE                           | 1.4                                                  | 2.7                                                  | 2                        | 20                 |
| IBX2           | IMMUNE SYSTEM                            | 1.2                                                  | 5.8                                                  | 5                        | 23                 |
| IBX2           | IMMUNE SYSTEM                            | 1.3                                                  | 5.2                                                  | 4                        | 24                 |
| IBX2           | IMMUNE SYSTEM                            | 1.5                                                  | 2.9                                                  | 2                        | 23                 |
| IBX2           | IMMUNE SYSTEM                            | 1.1                                                  | 2.2                                                  | 2                        | 13                 |
| IBX2           | IMMUNE SYSTEM                            | 1.7                                                  | 6.7                                                  | 4                        | 22                 |
| 1COG           | CONTRACTILE PROTEIN                      | 1.9                                                  | 7.4                                                  | 4                        | 18                 |
| 1CAX           | SEED STORAGE PROTEIN                     | 1.1                                                  | 2.2                                                  | 2                        | 9                  |
| 1CB7           | ISOMERASE                                | 1.5                                                  | 3.0                                                  | 2                        | 15                 |
| 1CB7           | ISOMERASE                                | 1.5                                                  | 4.4                                                  | 3                        | 6                  |
| 1CB7           | ISOMERASE                                | 1.5                                                  | 2.9                                                  | 2                        | 14                 |
| 1CC0           | SIGNALING PROTEIN                        | 1.3                                                  | 2.6                                                  | 2                        | 19                 |
| 1CDL           | CALCIUM-BINDING PROTEIN                  | 1.4                                                  | 2.8                                                  | 2                        | 12                 |
| 1CDL           | CALCIUM-BINDING PROTEIN                  | 1.5                                                  | 4.4                                                  | 3                        | 16                 |
| 1CDL           | CALCIUM-BINDING PROTEIN                  | 1.5                                                  | 4.5                                                  | 3                        | 15                 |
| 1CDL           | CALCIUM-BINDING PROTEIN                  | 1.4                                                  | 4.2                                                  | 3                        | 10                 |
| 1CDL           | CALCIUM-BINDING PROTEIN                  | 1.5                                                  | 3.0                                                  | 2                        | 15                 |
| 1CDL           | CALCIUM-BINDING PROTEIN                  | 1.7                                                  | 3.3                                                  | 2                        | 9                  |
| 1CDL           | CALCIUM-BINDING PROTEIN                  | 1.8                                                  | 3.5                                                  | 2                        | 17                 |
| 1CDL           | CALCIUM-BINDING PROTEIN                  | 1.5                                                  | 4.5                                                  | 3                        | 15                 |
| 1CDL           | CALCIUM-BINDING PROTEIN                  | 1.3                                                  | 4.0                                                  | 3                        | 9                  |
| 1CDL           | CALCIUM-BINDING PROTEIN                  | 1.8                                                  | 16.2                                                 | 9                        | 17                 |
| 1CFF           | CALMODULIN                               | 1.9                                                  | 3.7                                                  | 2                        | 11                 |
| 1CFF           | CALMODULIN                               | 1.6                                                  | 4.8                                                  | 3                        | 12                 |
| 1CFF           | CALMODULIN                               | 1.1                                                  | 2.2                                                  | 2                        | 10                 |
| 1C16           | TRANSCRIPTION                            | 1.6                                                  | 13.1                                                 | 8                        | 55                 |
| 1CM1           | COMPLEX (CALCIUM-BINDING/TRANSFERASE)    | 1.5                                                  | 2.9                                                  | 2                        | 9                  |
| 1CM1           | COMPLEX (CALCIUM-BINDING/TRANSFERASE)    | 1.6                                                  | 11.3                                                 | 7                        | 16                 |
| 1CP9           | HYDROLASE                                | 1.4                                                  | 4.3                                                  | 3                        | 10                 |
| 1CP9           | HYDROLASE                                | 1.6                                                  | 3.2                                                  | 2                        | 6                  |
| 1CP9           | HYDROLASE                                | 1.3                                                  | 2.5                                                  | 2                        | 11                 |
| 1CP9           | HYDROLASE                                | 1.4                                                  | 5.6                                                  | 4                        | 24                 |
| 1CSE           | COMPLEX(SERINE PROTEINASE-INHIBITOR)     | 1.3                                                  | 2.6                                                  | 2                        | 14                 |
| 1CUL           | LYASE/LYASE/SIGNALING PROTEIN            | 1.8                                                  | 11.0                                                 | 6                        | 19                 |
| 1CUL           | LYASE/LYASE/SIGNALING PROTEIN            | 1.4                                                  | 2.8                                                  | 2                        | 19                 |
| 1CXZ           | SIGNALING PROTEIN                        | 1.7                                                  | 3.3                                                  | 2                        | 27                 |
| 1D2Z           | APOPTOSIS                                | 1.4                                                  | 2.7                                                  | 2                        | 13                 |
| 1D2Z           | APOPTOSIS                                | 1.5                                                  | 3.0                                                  | 2                        | 15                 |
| 1D2Z           | APOPTOSIS                                | 1.5                                                  | 2.9                                                  | 2                        | 13                 |
| 1D3B           | RNA BINDING PROTEIN                      | 1.6                                                  | 3.1                                                  | 2                        | 9                  |
| 1D8D           | TRANSFERASE                              | 1.8                                                  | 3.5                                                  | 2                        | 15                 |
| 1D8D           | TRANSFERASE                              | 1.7                                                  | 3.4                                                  | 2                        | 15                 |
| 1D8D           | TRANSFERASE                              | 1.2                                                  | 2.4                                                  | 2                        | 12                 |
| 1DAN           | COMPLEX(SERINE PROTEASE/COFACTOR/LIGAND) | 1.4                                                  | 2.7                                                  | 2                        | 10                 |
| 1DE4           | METAL TRANSPORT INHIBITOR/RECEPTOR       | 1.9                                                  | 3.7                                                  | 2                        | 12                 |
| 1DE4           | METAL TRANSPORT INHIBITOR/RECEPTOR       | 1.8                                                  | 5.5                                                  | 3                        | 23                 |
| 1DE4           | METAL TRANSPORT INHIBITOR/RECEPTOR       | 1.8                                                  | 7.0                                                  | 4                        | 28                 |
| 1DEV           | SIGNALING PROTEIN                        | 1.0                                                  | 2.0                                                  | 2                        | 6                  |
| 1DKD           | CHAPERONE                                | 1.4                                                  | 2.8                                                  | 2                        | 15                 |
| 1DKF           | HORMONE/GROWTH FACTOR RECEPTOR           | 1.0                                                  | 2.0                                                  | 2                        | 23                 |
| 1DKF           | HORMONE/GROWTH FACTOR RECEPTOR           | 1.3                                                  | 2.5                                                  | 2                        | 9                  |
| 1DKG           | COMPLEX (HSP24/HSP70)                    | 1.2                                                  | 2.3                                                  | 2                        | 18                 |
| 1DML           | DNA BINDING PROTEIN/TRANSFERASE          | 1.9                                                  | 3.8                                                  | 2                        | 15                 |
| 1DML           | DNA BINDING PROTEIN/TRANSFERASE          | 1.6                                                  | 4.9                                                  | 3                        | 15                 |
| 1DML           | DNA BINDING PROTEIN/TRANSFERASE          | 1.7                                                  | 12.0                                                 | 7                        | 15                 |
| 1DOW           | CELL ADHESION                            | 1.8                                                  | 5.4                                                  | 3                        | 26                 |
| 1DOW           | CELL ADHESION                            | 1.6                                                  | 4.8                                                  | 3                        | 10                 |
| 1DS6           | SIGNALING PROTEIN                        | 1.7                                                  | 8.6                                                  | 5                        | 12                 |

TABLE S4

Jochim, et al

| A. PDB<br>CODE | J. HELIX START<br>RESIDUE # | K. HELIX END<br>RESIDUE # |
|----------------|-----------------------------|---------------------------|
| IBSX           | 689                         | 694                       |
| IBSX           | 689                         | 694                       |
| 1BTH           | 14                          | 14                        |
| 1BUH           | 208                         | 219                       |
| 1BVK           | 120                         | 125                       |
| 1BVY           | 609                         | 628                       |
| 1BX2           | 56                          | 78                        |
| 1BX2           | 66                          | 89                        |
| 1BX2           | 56                          | 78                        |
| 1BX2           | 52                          | 64                        |
| 1BX2           | 65                          | 86                        |
| 1COG           | 73                          | 90                        |
| 1CAX           | 192                         | 200                       |
| 1CB7           | 17                          | 31                        |
| 1CB7           | 67                          | 72                        |
| 1CB7           | 17                          | 30                        |
| 1CC0           | 89                          | 107                       |
| 1CDL           | 118                         | 129                       |
| 1CDL           | 78                          | 93                        |
| 1CDL           | 6                           | 20                        |
| 1CDL           | 65                          | 74                        |
| 1CDL           | 6                           | 20                        |
| 1CDL           | 138                         | 146                       |
| 1CDL           | 797                         | 813                       |
| 1CDL           | 6                           | 20                        |
| 1CDL           | 65                          | 73                        |
| 1CDL           | 799                         | 815                       |
| 1CFF           | 103                         | 113                       |
| 1CFF           | 118                         | 129                       |
| 1CFF           | 138                         | 147                       |
| 1C16           | 287                         | 341                       |
| 1CM1           | 138                         | 146                       |
| 1CM1           | 295                         | 310                       |
| 1CP9           | 61                          | 70                        |
| 1CP9           | 115                         | 120                       |
| 1CP9           | 38                          | 48                        |
| 1CP9           | 85                          | 108                       |
| 1CSE           | 104                         | 117                       |
| 1CUL           | 909                         | 927                       |
| 1CUL           | 909                         | 927                       |
| 1CXZ           | 71                          | 97                        |
| 1D2Z           | 82                          | 94                        |
| 1D2Z           | 39                          | 53                        |
| 1D2Z           | 82                          | 94                        |
| 1D3B           | 6                           | 14                        |
| 1D8D           | 274                         | 288                       |
| 1D8D           | 166                         | 180                       |
| 1D8D           | 270                         | 281                       |
| 1DAN           | 126                         | 129                       |
| 1DE4           | 140                         | 151                       |
| 1DE4           | 640                         | 662                       |
| 1DE4           | 59                          | 86                        |
| 1DEV           | 686                         | 691                       |
| 1DKD           | 230                         | 244                       |
| 1DKF           | 345                         | 367                       |
| 1DKF           | 371                         | 379                       |
| 1DKG           | 256                         | 273                       |
| 1DML           | 1220                        | 1234                      |
| 1DML           | 1220                        | 1234                      |
| 1DML           | 1220                        | 1234                      |
| 1DOW           | 58                          | 83                        |
| 1DOW           | 133                         | 142                       |
| 1DS6           | 43                          | 54                        |



| A. PDB<br>CODE | L. HELIX SEQUENCE                                       |
|----------------|---------------------------------------------------------|
| IBSX           | ILHRLL                                                  |
| IBSX           | ILHRLL                                                  |
| 1BTH           | ERELLESYI                                               |
| IBUH           | EIDQLFRIFRTL                                            |
| IBVK           | VQAWIR                                                  |
| IBVY           | FEGTYEEWREHMWSDVAAYF                                    |
| IBX2           | AQGALANIAVDKANLEIMTKRSN                                 |
| IBX2           | DILEQARAAVDTCRHNYGVVESF                                 |
| IBX2           | AQGALANIAVDKANLEIMTKRSN                                 |
| IBX2           | ELGRPDAEYWNSQ                                           |
| IBX2           | KDILEQARAAVDTCRHNYGVV                                   |
| 1COG           | QDESGAAAIFTVQLDDYL                                      |
| 1CAX           | KNFLEASYD                                               |
| 1CB7           | AVGNKILDHAFTNAG                                         |
| 1CB7           | GEIDCK                                                  |
| 1CB7           | AVGNKILDHAFTNA                                          |
| 1CC0           | PDSLENIPEKWTPEVKHFC                                     |
| 1CDL           | DEEVDEMIREAD                                            |
| 1CDL           | DTDSEEEIREAFRVFD                                        |
| 1CDL           | EEQIAEFKEAFSLFD                                         |
| 1CDL           | FPEFLTMMAR                                              |
| 1CDL           | EEQIAEFKEAFSLFD                                         |
| 1CDL           | YEEFVQMMT                                               |
| 1CDL           | RRKWQKTGHAVRAIGRL                                       |
| 1CDL           | EEQIAEFKEAFSLFD                                         |
| 1CDL           | FPEFLTMMA                                               |
| 1CDL           | KWQKTGHAVRAIGRLSS                                       |
| 1CFF           | AELRHVMTNLG                                             |
| 1CFF           | DEEVDEMIREAD                                            |
| 1CFF           | YEEFVQMMA                                               |
| 1C16           | QNKTAATRYRQKKRAEQEALTGECKELEKKNEALKERADSLAKEIQYLKDLIEEV |
| 1CM1           | YEEFVQMMT                                               |
| 1CM1           | ARRKLGAILTTMLAT                                         |
| 1CP9           | ISFDKEIRNN                                              |
| 1CP9           | KQFIDY                                                  |
| 1CP9           | LFQMEMAKRST                                             |
| 1CP9           | SQEQDILRGYADGMNAWIKQINTK                                |
| 1CSE           | YSGIVSGIEWATTN                                          |
| 1CUL           | LECLRLLNEIADFDDLLS                                      |
| 1CUL           | LECLRLLNEIADFDDLLS                                      |
| 1CXZ           | GPVELLRGSSRRLLDHLHQQQLQELHAH                            |
| 1D2Z           | ASNEFLNIWGGQY                                           |
| 1D2Z           | LPVRAQLCAHLDALD                                         |
| 1D2Z           | ASNEFLNIWGGQY                                           |
| 1D3B           | PIKVLHEAE                                               |
| 1D8D           | ESAWNYLKGILQDRG                                         |
| 1D8D           | YQVWHHRRVLVEWLK                                         |
| 1D8D           | LKSLQWVTSRQ                                             |
| 1DAN           | RTFSERTLAF                                              |
| 1DE4           | AWPTKLEWERHK                                            |
| 1DE4           | QWLYSARGDFRATSRLTTDFGN                                  |
| 1DE4           | SQMWLQLSQSLKGWDHMFVDFWTIMEN                             |
| 1DEV           | PLQQAQ                                                  |
| 1DKD           | IREMLPVLEAVAKAG                                         |
| 1DKF           | PDRVDMLQEPLLEALKVYVRKRR                                 |
| 1DKF           | PHMFPKMLM                                               |
| 1DKG           | PLAMQRLKEAAEKAKIEL                                      |
| 1DML           | AEETRRMLHRAFDTL                                         |
| 1DML           | AEETRRMLHRAFDTL                                         |
| 1DML           | AEETRRMLHRAFDTL                                         |
| 1DOW           | AHVLAASVEQATENFLEKGDKIAKES                              |
| 1DOW           | KHAVVNLINY                                              |
| 1DS6           | ESLIKYKKTLLG                                            |

| A. PDB<br>CODE | M. RESOLUTION |
|----------------|---------------|
| IBSX           | 3.7           |
| IBSX           | 3.7           |
| 1BTH           | 2.3           |
| 1BUH           | 2.6           |
| 1BVK           | 2.7           |
| 1BVY           | 2.03          |
| 1BX2           | 2.6           |
| 1BX2           | 2.6           |
| 1BX2           | 2.6           |
| 1BX2           | 2.6           |
| 1BX2           | 2.6           |
| 1COG           | 2             |
| 1CAX           | 2.6           |
| 1CB7           | 2             |
| 1CB7           | 2             |
| 1CB7           | 2             |
| 1CC0           | 5             |
| 1CDL           | 2             |
| 1CDL           | 2             |
| 1CDL           | 2             |
| 1CDL           | 2             |
| 1CDL           | 2             |
| 1CDL           | 2             |
| 1CDL           | 2             |
| 1CDL           | 2             |
| 1CDL           | 2             |
| 1CDL           | 2             |
| 1CDL           | 2             |
| 1CDL           | 2             |
| 1CFF           | NOT APP       |
| 1CFF           | NOT APP       |
| 1CFF           | NOT APP       |
| 1C16           | 2.6           |
| 1CM1           | 2             |
| 1CM1           | 2             |
| 1CP9           | 2.5           |
| 1CP9           | 2.5           |
| 1CP9           | 2.5           |
| 1CP9           | 2.5           |
| 1CP9           | 2.5           |
| 1CSE           | 1.2           |
| 1CUL           | 2.4           |
| 1CUL           | 2.4           |
| 1CXZ           | 2.2           |
| 1D2Z           | 2             |
| 1D2Z           | 2             |
| 1D2Z           | 2             |
| 1D3B           | 2             |
| 1D8D           | 2             |
| 1D8D           | 2             |
| 1D8D           | 2             |
| 1DAN           | 2             |
| 1DE4           | 2.8           |
| 1DE4           | 2.8           |
| 1DE4           | 2.8           |
| 1DEV           | 2.2           |
| 1DKD           | 2.1           |
| 1DKF           | 2.5           |
| 1DKF           | 2.5           |
| 1DKG           | 2.8           |
| 1DML           | 2.7           |
| 1DML           | 2.7           |
| 1DML           | 2.7           |
| 1DOW           | 1.8           |
| 1DOW           | 1.8           |
| 1DS6           | 2.35          |

| A. PDB CODE | B. INTERFACE CHAINS | C. CHAIN | D. TITLE                                                                                    |
|-------------|---------------------|----------|---------------------------------------------------------------------------------------------|
| 1DX5        | C O                 | O        | CRYSTAL STRUCTURE OF THE THROMBIN-THROMBOMODULIN COMPLEX                                    |
| 1DX5        | D P                 | P        | CRYSTAL STRUCTURE OF THE THROMBIN-THROMBOMODULIN COMPLEX                                    |
| 1E3A        | AB                  | A        | A SLOW PROCESSING PRECURSOR PENICILLIN ACYLASE FROM ESCHERICHIA COLI                        |
| 1E3A        | AB                  | A        | A SLOW PROCESSING PRECURSOR PENICILLIN ACYLASE FROM ESCHERICHIA COLI                        |
| 1E3A        | AB                  | B        | A SLOW PROCESSING PRECURSOR PENICILLIN ACYLASE FROM ESCHERICHIA COLI                        |
| 1E6E        | AB                  | B        | ADRENODOXIN REDUCTASE/ADRENODOXIN COMPLEX OF MITOCHONDRIAL P450 SYSTEMS                     |
| 1E7P        | AB                  | A        | QUINOL:FUMARATE REDUCTASE FROM WOLINELLA SUCCINOGENES                                       |
| 1E7P        | AB                  | A        | QUINOL:FUMARATE REDUCTASE FROM WOLINELLA SUCCINOGENES                                       |
| 1E7P        | BC                  | C        | QUINOL:FUMARATE REDUCTASE FROM WOLINELLA SUCCINOGENES                                       |
| 1E7P        | DE                  | E        | QUINOL:FUMARATE REDUCTASE FROM WOLINELLA SUCCINOGENES                                       |
| 1E7P        | GH                  | H        | QUINOL:FUMARATE REDUCTASE FROM WOLINELLA SUCCINOGENES                                       |
| 1E7P        | JK                  | K        | QUINOL:FUMARATE REDUCTASE FROM WOLINELLA SUCCINOGENES                                       |
| 1E80        | AB                  | A        | CORE OF THE ALU DOMAIN OF THE MAMMALIAN SRP                                                 |
| 1E80        | CD                  | C        | CORE OF THE ALU DOMAIN OF THE MAMMALIAN SRP                                                 |
| 1E80        | CD                  | D        | CORE OF THE ALU DOMAIN OF THE MAMMALIAN SRP                                                 |
| 1EAY        | AC                  | A        | CHEY-BINDING (P2) DOMAIN OF CHEA IN COMPLEX WITH CHEY FROM ESCHERICHIA COLI                 |
| 1EAY        | AC                  | C        | CHEY-BINDING (P2) DOMAIN OF CHEA IN COMPLEX WITH CHEY FROM ESCHERICHIA COLI                 |
| 1EBD        | BC                  | C        | DIHYDROLIPOAMIDE DEHYDROGENASE COMPLEXED WITH THE BINDING DOMAIN OF THE DIHYDROLI           |
| 1EER        | AC                  | A        | CRYSTAL STRUCTURE OF HUMAN ERYTHROPOIETIN COMPLEXED TO ITS RECEPTOR AT 1.9 ANGSTROMS        |
| 1EJH        | AE                  | E        | EIF4E/EIF4G PEPTIDE/7-METHYL-GDP                                                            |
| 1EJH        | BF                  | B        | EIF4E/EIF4G PEPTIDE/7-METHYL-GDP                                                            |
| 1EJR        | CA                  | A        | CRYSTAL STRUCTURE OF THE D221A VARIANT OF KLEBSIELLA AEROGENES UREASE                       |
| 1EM8        | CD                  | D        | CRYSTAL STRUCTURE OF CHI AND PSI SUBUNIT HETERODIMER FROM DNA POL III                       |
| 1EMU        | AB                  | B        | STRUCTURE OF THE AXIN RGS-HOMOLOGOUS DOMAIN IN COMPLEX WITH A SAMP REPEAT FROM APC          |
| 1F51        | AE                  | A        | A TRANSIENT INTERACTION BETWEEN TWO PHOSPHORELAY PROTEINSTRAPPED IN A CRYSTAL LATTICE       |
| 1F51        | DH                  | H        | A TRANSIENT INTERACTION BETWEEN TWO PHOSPHORELAY PROTEINSTRAPPED IN A CRYSTAL LATTICE       |
| 1F5Q        | AB                  | A        | CRYSTAL STRUCTURE OF MURINE GAMMA HERPESVIRUS CYCLIN COMPLEXED TO HUMAN CYCLIN DEI          |
| 1F5Q        | AB                  | B        | CRYSTAL STRUCTURE OF MURINE GAMMA HERPESVIRUS CYCLIN COMPLEXED TO HUMAN CYCLIN DEI          |
| 1F5Q        | CD                  | C        | CRYSTAL STRUCTURE OF MURINE GAMMA HERPESVIRUS CYCLIN COMPLEXED TO HUMAN CYCLIN DEI          |
| 1F5Q        | CD                  | D        | CRYSTAL STRUCTURE OF MURINE GAMMA HERPESVIRUS CYCLIN COMPLEXED TO HUMAN CYCLIN DEI          |
| 1F60        | AB                  | A        | CRYSTAL STRUCTURE OF THE YEAST ELONGATION FACTOR COMPLEX EEF1A:EEF1BA                       |
| 1F80        | AE                  | E        | HOLO-(ACYL CARRIER PROTEIN) SYNTHASE IN COMPLEX WITH HOLO- (ACYL CARRIER PROTEIN)           |
| 1F80        | AE                  | E        | HOLO-(ACYL CARRIER PROTEIN) SYNTHASE IN COMPLEX WITH HOLO- (ACYL CARRIER PROTEIN)           |
| 1F80        | BD                  | B        | HOLO-(ACYL CARRIER PROTEIN) SYNTHASE IN COMPLEX WITH HOLO- (ACYL CARRIER PROTEIN)           |
| 1F80        | CF                  | C        | HOLO-(ACYL CARRIER PROTEIN) SYNTHASE IN COMPLEX WITH HOLO- (ACYL CARRIER PROTEIN)           |
| 1F93        | AF                  | F        | CRYSTAL STRUCTURE OF A COMPLEX BETWEEN THE DIMERIZATION DOMAIN OF HNF-1 ALPHA AND TH        |
| 1F9E        | AB                  | B        | CASPASE-8 SPECIFICITY PROBED AT SUBSITE S4: CRYSTAL STRUCTURE OF THE CASPASE-8-Z-DEVD-CHO   |
| 1FAV        | AC                  | C        | THE STRUCTURE OF AN HIV-1 SPECIFIC CELL ENTRY INHIBITOR IN COMPLEX WITH THE HIV-1 GP41 TRIM |
| 1FBV        | AC                  | C        | STRUCTURE OF A CBL-UBCH7 COMPLEX: RING DOMAIN FUNCTION IN UBIQUITIN-PROTEIN LIGASES         |
| 1FG9        | AC                  | A        | 3:1 COMPLEX OF INTERFERON-GAMMA RECEPTOR WITH INTERFERON- GAMMA DIMER                       |
| 1FM6        | AD                  | D        | THE 2.1 ANGSTROM RESOLUTION CRYSTAL STRUCTURE OF THE HETERODIMER OF THE HUMAN RXRAL         |
| 1FM6        | DE                  | E        | THE 2.1 ANGSTROM RESOLUTION CRYSTAL STRUCTURE OF THE HETERODIMER OF THE HUMAN RXRALI        |
| 1FM6        | UV                  | U        | THE 2.1 ANGSTROM RESOLUTION CRYSTAL STRUCTURE OF THE HETERODIMER OF THE HUMAN RXRALI        |
| 1FM6        | UX                  | U        | THE 2.1 ANGSTROM RESOLUTION CRYSTAL STRUCTURE OF THE HETERODIMER OF THE HUMAN RXRALI        |
| 1FM6        | UX                  | U        | THE 2.1 ANGSTROM RESOLUTION CRYSTAL STRUCTURE OF THE HETERODIMER OF THE HUMAN RXRALI        |
| 1FM6        | XY                  | Y        | THE 2.1 ANGSTROM RESOLUTION CRYSTAL STRUCTURE OF THE HETERODIMER OF THE HUMAN RXRALI        |
| 1FOE        | AB                  | B        | CRYSTAL STRUCTURE OF RAC1 IN COMPLEX WITH THE GUANINE NUCLEOTIDE EXCHANGE REGION OF         |
| 1FOE        | AD                  | D        | CRYSTAL STRUCTURE OF RAC1 IN COMPLEX WITH THE GUANINE NUCLEOTIDE EXCHANGE REGION OF         |
| 1FOE        | EF                  | E        | CRYSTAL STRUCTURE OF RAC1 IN COMPLEX WITH THE GUANINE NUCLEOTIDE EXCHANGE REGION OF         |
| 1FOE        | EF                  | F        | CRYSTAL STRUCTURE OF RAC1 IN COMPLEX WITH THE GUANINE NUCLEOTIDE EXCHANGE REGION OF         |
| 1FOE        | GH                  | H        | CRYSTAL STRUCTURE OF RAC1 IN COMPLEX WITH THE GUANINE NUCLEOTIDE EXCHANGE REGION OF         |
| 1FOS        | EF                  | E        | TWO HUMAN C-FOS:C-JUN:DNA COMPLEXES                                                         |
| 1FOS        | EF                  | F        | TWO HUMAN C-FOS:C-JUN:DNA COMPLEXES                                                         |
| 1FQ1        | AB                  | B        | CRYSTAL STRUCTURE OF KINASE ASSOCIATED PHOSPHATASE (KAP) IN COMPLEX WITH PHOSPHO-CDK2       |
| 1FQJ        | AB                  | B        | CRYSTAL STRUCTURE OF THE HETEROTRIMERIC COMPLEX OF THE RGS DOMAIN OF RGS9, THE GAMMA        |
| 1FQJ        | AC                  | A        | CRYSTAL STRUCTURE OF THE HETEROTRIMERIC COMPLEX OF THE RGS DOMAIN OF RGS9, THE GAMMA        |
| 1FQJ        | AC                  | A        | CRYSTAL STRUCTURE OF THE HETEROTRIMERIC COMPLEX OF THE RGS DOMAIN OF RGS9, THE GAMMA        |
| 1FQJ        | AC                  | C        | CRYSTAL STRUCTURE OF THE HETEROTRIMERIC COMPLEX OF THE RGS DOMAIN OF RGS9, THE GAMMA        |
| 1FQJ        | DE                  | E        | CRYSTAL STRUCTURE OF THE HETEROTRIMERIC COMPLEX OF THE RGS DOMAIN OF RGS9, THE GAMMA        |
| 1FQV        | AB                  | B        | INSIGHTS INTO SCF UBIQUITIN LIGASES FROM THE STRUCTURE OF THE SKP1-SKP2 COMPLEX             |
| 1FQV        | AB                  | B        | INSIGHTS INTO SCF UBIQUITIN LIGASES FROM THE STRUCTURE OF THE SKP1-SKP2 COMPLEX             |
| 1FQV        | CD                  | C        | INSIGHTS INTO SCF UBIQUITIN LIGASES FROM THE STRUCTURE OF THE SKP1-SKP2 COMPLEX             |

TABLE S4

Jochim, et al

| A. PDB<br>CODE | E. FUNCTION                              | F. $\Delta\Delta G_{\text{AVG,HELIX}}$<br>(KCAL/MOL) | G. $\Delta\Delta G_{\text{SUM,HELIX}}$<br>(KCAL/MOL) | H. # HOTSPOT<br>RESIDUES | I. HELIX<br>LENGTH |
|----------------|------------------------------------------|------------------------------------------------------|------------------------------------------------------|--------------------------|--------------------|
| 1DX5           | SERINE PROTEINASE                        | 1.5                                                  | 2.9                                                  | 2                        | 11                 |
| 1DX5           | SERINE PROTEINASE                        | 1.1                                                  | 2.1                                                  | 2                        | 11                 |
| 1E3A           | ANTIBIOTIC RESISTANCE                    | 1.3                                                  | 4.0                                                  | 3                        | 22                 |
| 1E3A           | ANTIBIOTIC RESISTANCE                    | 1.9                                                  | 5.8                                                  | 3                        | 10                 |
| 1E3A           | ANTIBIOTIC RESISTANCE                    | 1.5                                                  | 8.9                                                  | 6                        | 13                 |
| 1E6E           | OXIDOREDUCTASE                           | 1.8                                                  | 5.3                                                  | 3                        | 9                  |
| 1E7P           | OXIDOREDUCTASE                           | 1.3                                                  | 2.6                                                  | 2                        | 9                  |
| 1E7P           | OXIDOREDUCTASE                           | 1.5                                                  | 4.5                                                  | 3                        | 17                 |
| 1E7P           | OXIDOREDUCTASE                           | 1.2                                                  | 3.5                                                  | 3                        | 15                 |
| 1E7P           | OXIDOREDUCTASE                           | 1.2                                                  | 2.3                                                  | 2                        | 13                 |
| 1E7P           | OXIDOREDUCTASE                           | 1.0                                                  | 2.0                                                  | 2                        | 13                 |
| 1E7P           | OXIDOREDUCTASE                           | 1.1                                                  | 2.1                                                  | 2                        | 13                 |
| 1E80           | ALU RIBONUCLEOPROTEIN PARTICLE           | 1.9                                                  | 7.6                                                  | 4                        | 19                 |
| 1E80           | ALU RIBONUCLEOPROTEIN PARTICLE           | 1.7                                                  | 5.1                                                  | 3                        | 17                 |
| 1E80           | ALU RIBONUCLEOPROTEIN PARTICLE           | 1.0                                                  | 2.0                                                  | 2                        | 16                 |
| 1EAY           | SIGNAL TRANSDUCTION COMPLEX              | 1.4                                                  | 4.1                                                  | 3                        | 16                 |
| 1EAY           | SIGNAL TRANSDUCTION COMPLEX              | 1.2                                                  | 2.3                                                  | 2                        | 13                 |
| 1EBD           | COMPLEX (OXIDOREDUCTASE/TRANSFERASE)     | 1.5                                                  | 2.9                                                  | 2                        | 10                 |
| 1EER           | COMPLEX (CYTOKINE/RECEPTOR)              | 1.1                                                  | 2.2                                                  | 2                        | 18                 |
| 1EJH           | TRANSLATION                              | 1.7                                                  | 5.2                                                  | 3                        | 7                  |
| 1EJH           | TRANSLATION                              | 1.9                                                  | 5.6                                                  | 3                        | 10                 |
| 1EJR           | HYDROLASE                                | 1.1                                                  | 2.2                                                  | 2                        | 19                 |
| 1EM8           | GENE REGULATION                          | 1.1                                                  | 2.1                                                  | 2                        | 10                 |
| 1EMU           | SIGNALING PROTEIN                        | 1.9                                                  | 3.8                                                  | 2                        | 11                 |
| 1F51           | TRANSFERASE                              | 1.3                                                  | 5.1                                                  | 4                        | 31                 |
| 1F51           | TRANSFERASE                              | 1.3                                                  | 2.6                                                  | 2                        | 11                 |
| 1F5Q           | TRANSFERASE                              | 1.8                                                  | 5.4                                                  | 3                        | 13                 |
| 1F5Q           | TRANSFERASE                              | 1.8                                                  | 3.5                                                  | 2                        | 20                 |
| 1F5Q           | TRANSFERASE                              | 1.3                                                  | 2.6                                                  | 2                        | 13                 |
| 1F5Q           | TRANSFERASE                              | 1.8                                                  | 3.5                                                  | 2                        | 20                 |
| 1F60           | TRANSLATION                              | 1.7                                                  | 3.3                                                  | 2                        | 15                 |
| 1F80           | TRANSFERASE                              | 1.5                                                  | 3.0                                                  | 2                        | 7                  |
| 1F80           | TRANSFERASE                              | 1.9                                                  | 9.5                                                  | 5                        | 13                 |
| 1F80           | TRANSFERASE                              | 1.2                                                  | 2.3                                                  | 2                        | 11                 |
| 1F80           | TRANSFERASE                              | 1.5                                                  | 2.9                                                  | 2                        | 9                  |
| 1F93           | TRANSCRIPTION                            | 1.1                                                  | 2.1                                                  | 2                        | 13                 |
| 1F9E           | APOPTOSIS                                | 1.4                                                  | 4.3                                                  | 3                        | 16                 |
| 1FAV           | VIRAL PROTEIN                            | 1.3                                                  | 2.6                                                  | 2                        | 11                 |
| 1FBV           | LIGASE                                   | 1.7                                                  | 10.4                                                 | 6                        | 12                 |
| 1FG9           | IMMUNE SYSTEM                            | 1.7                                                  | 3.3                                                  | 2                        | 13                 |
| 1FM6           | TRANSCRIPTION                            | 1.8                                                  | 3.5                                                  | 2                        | 30                 |
| 1FM6           | TRANSCRIPTION                            | 1.4                                                  | 5.5                                                  | 4                        | 10                 |
| 1FM6           | TRANSCRIPTION                            | 1.8                                                  | 3.6                                                  | 2                        | 6                  |
| 1FM6           | TRANSCRIPTION                            | 1.6                                                  | 3.2                                                  | 2                        | 7                  |
| 1FM6           | TRANSCRIPTION                            | 1.1                                                  | 2.2                                                  | 2                        | 23                 |
| 1FM6           | TRANSCRIPTION                            | 1.8                                                  | 5.4                                                  | 3                        | 9                  |
| 1FOE           | SIGNALING PROTEIN, IMMUNE SYSTEM/SIGNALI | 1.8                                                  | 3.6                                                  | 2                        | 5                  |
| 1FOE           | SIGNALING PROTEIN, IMMUNE SYSTEM/SIGNALI | 1.9                                                  | 5.7                                                  | 3                        | 19                 |
| 1FOE           | SIGNALING PROTEIN, IMMUNE SYSTEM/SIGNALI | 1.0                                                  | 2.0                                                  | 2                        | 12                 |
| 1FOE           | SIGNALING PROTEIN, IMMUNE SYSTEM/SIGNALI | 1.6                                                  | 3.2                                                  | 2                        | 5                  |
| 1FOE           | SIGNALING PROTEIN, IMMUNE SYSTEM/SIGNALI | 1.8                                                  | 5.3                                                  | 3                        | 5                  |
| 1FOS           | TRANSCRIPTION/DNA                        | 1.3                                                  | 8.8                                                  | 7                        | 58                 |
| 1FOS           | TRANSCRIPTION/DNA                        | 1.9                                                  | 11.6                                                 | 6                        | 56                 |
| 1FQ1           | HYDROLASE/TRANSFERASE                    | 1.2                                                  | 2.3                                                  | 2                        | 12                 |
| 1FQJ           | SIGNALING PROTEIN                        | 1.2                                                  | 2.4                                                  | 2                        | 21                 |
| 1FQJ           | SIGNALING PROTEIN                        | 1.0                                                  | 2.0                                                  | 2                        | 14                 |
| 1FQJ           | SIGNALING PROTEIN                        | 1.9                                                  | 5.7                                                  | 3                        | 10                 |
| 1FQJ           | SIGNALING PROTEIN                        | 1.8                                                  | 3.6                                                  | 2                        | 7                  |
| 1FQJ           | SIGNALING PROTEIN                        | 1.3                                                  | 2.6                                                  | 2                        | 22                 |
| 1FQV           | LIGASE                                   | 1.3                                                  | 2.6                                                  | 2                        | 10                 |
| 1FQV           | LIGASE                                   | 1.5                                                  | 2.9                                                  | 2                        | 8                  |
| 1FQV           | LIGASE                                   | 1.5                                                  | 2.9                                                  | 2                        | 8                  |

TABLE S4

Jochim, et al

| A. PDB<br>CODE | J. HELIX START<br>RESIDUE # | K. HELIX END<br>RESIDUE # |
|----------------|-----------------------------|---------------------------|
| IDX5           | 235                         | 245                       |
| IDX5           | 235                         | 245                       |
| 1E3A           | 87                          | 108                       |
| 1E3A           | 63                          | 72                        |
| 1E3A           | 410                         | 422                       |
| 1E6E           | 72                          | 80                        |
| 1E7P           | 346                         | 354                       |
| 1E7P           | 156                         | 172                       |
| 1E7P           | 105                         | 119                       |
| 1E7P           | 36                          | 48                        |
| 1E7P           | 36                          | 48                        |
| 1E7P           | 36                          | 48                        |
| 1E7P           | 36                          | 48                        |
| 1E8O           | 56                          | 74                        |
| 1E8O           | 59                          | 75                        |
| 1E8O           | 76                          | 91                        |
| 1EAY           | 113                         | 128                       |
| 1EAY           | 171                         | 183                       |
| 1EBD           | 133                         | 142                       |
| 1EER           | 9                           | 26                        |
| 1EJH           | 626                         | 632                       |
| 1EJH           | 69                          | 78                        |
| 1EJR           | 3032                        | 3050                      |
| 1EM8           | 52                          | 61                        |
| 1EMU           | 2037                        | 2047                      |
| 1F51           | 15                          | 45                        |
| 1F51           | 1413                        | 1423                      |
| 1F5Q           | 46                          | 58                        |
| 1F5Q           | 17                          | 36                        |
| 1F5Q           | 46                          | 58                        |
| 1F5Q           | 17                          | 36                        |
| 1F60           | 56                          | 70                        |
| 1F80           | 56                          | 62                        |
| 1F80           | 38                          | 50                        |
| 1F80           | 12                          | 22                        |
| 1F80           | 22                          | 30                        |
| 1F93           | 7                           | 19                        |
| 1F9E           | 348                         | 362                       |
| 1FAV           | 128                         | 138                       |
| 1FBV           | 1006                        | 1017                      |
| 1FG9           | 3                           | 15                        |
| 1FM6           | 431                         | 460                       |
| 1FM6           | 688                         | 697                       |
| 1FM6           | 449                         | 454                       |
| 1FM6           | 414                         | 420                       |
| 1FM6           | 421                         | 443                       |
| 1FM6           | 688                         | 696                       |
| 1FOE           | 65                          | 69                        |
| 1FOE           | 87                          | 105                       |
| 1FOE           | 1195                        | 1206                      |
| 1FOE           | 65                          | 69                        |
| 1FOE           | 65                          | 69                        |
| 1FOS           | 140                         | 197                       |
| 1FOS           | 267                         | 322                       |
| 1FQ1           | 208                         | 219                       |
| 1FQJ           | 386                         | 406                       |
| 1FQJ           | 238                         | 251                       |
| 1FQJ           | 201                         | 210                       |
| 1FQJ           | 78                          | 84                        |
| 1FQJ           | 386                         | 407                       |
| 1FQV           | 147                         | 156                       |
| 1FQV           | 132                         | 139                       |
| 1FQV           | 137                         | 144                       |

| A. PDB<br>CODE | L. HELIX SEQUENCE                                          |
|----------------|------------------------------------------------------------|
| IDX5           | KKWIQKVIDQF                                                |
| IDX5           | KKWIQKVIDQF                                                |
| 1E3A           | PEDMSILQGYADGMNAWIDKVN                                     |
| 1E3A           | VKFDKDIRRN                                                 |
| 1E3A           | EVASLLAWTHQMK                                              |
| 1E6E           | DEENDMLDL                                                  |
| 1E7P           | QEICEYFAG                                                  |
| 1E7P           | TGHTMLFAVANECLKLG                                          |
| 1E7P           | YRQYLTFKTHKDLMR                                            |
| 1E7P           | IFIVLNMIRETYD                                              |
| 1E7P           | IFIVLNMIRETYD                                              |
| 1E7P           | IFIVLNMIRETYD                                              |
| 1E80           | AQDVKKIEKFHSQMLRLMV                                        |
| 1E80           | VKKIEKFHSQMLRLMVA                                          |
| 1E80           | VNKFQMAYSNLLRANM                                           |
| 1EAY           | AATLEEKLNKIFEKLG                                           |
| 1EAY           | EVDLLEELGHLT                                               |
| 1EBD           | PSVRKYAREK                                                 |
| 1EER           | SRVLERYLLEAKEAEKIT                                         |
| 1EJH           | REFLLDF                                                    |
| 1EJH           | VEDFWALYNH                                                 |
| 1EJR           | YPESVALISAFIMEGARDG                                        |
| 1EM8           | PLVSDVLRAL                                                 |
| 1EMU           | DDLLQECISSA                                                |
| 1F51           | TALTNELIHLLGHSRHDWMNKLQLIKGNLSL                            |
| 1F51           | SGIRILLNEVF                                                |
| 1F5Q           | STAIRESLLKEL                                               |
| 1F5Q           | EEDCRQMIYRSEREHDARMV                                       |
| 1F5Q           | STAIRESLLKEL                                               |
| 1F5Q           | EEDCRQMIYRSEREHDARMV                                       |
| 1F60           | YAWVLDKKAERERG                                             |
| 1F80           | DEDAEKI                                                    |
| 1F80           | DVVELVMELEDEF                                              |
| 1F80           | LKRIASMAGRQ                                                |
| 1F80           | QKRFAERIL                                                  |
| 1F93           | QLQTELLAALLES                                              |
| 1F9E           | WYIQLCQSLRERCPR                                            |
| 1FAV           | TSLIHSLIEES                                                |
| 1FBV           | RLMKELEEIRKC                                               |
| 1FG9           | PYVKEAENLKKYF                                              |
| 1FM6           | LFKLLQKMTDLRQIVTEHVQLLQVIKkte                              |
| 1FM6           | KILHRLLQEG                                                 |
| 1FM6           | TFLMEM                                                     |
| 1FM6           | RFAKLLL                                                    |
| 1FM6           | RLPALRSIGLKCLEHLFFFKLIG                                    |
| 1FM6           | KILHRLLQE                                                  |
| 1FOE           | DRLRP                                                      |
| 1FOE           | PASFENVRAKWYPEVRHHC                                        |
| 1FOE           | KYPLLLRELFAL                                               |
| 1FOE           | DRLRP                                                      |
| 1FOE           | DRLRP                                                      |
| 1FOS           | RRIRRERNKMAAAKSRNRRRELTDTLQAETDQLEDEKSALQTEIANLLKEKEKLEFIL |
| 1FOS           | KRMRNRIAASKSRKRKLERIARLEEKVKTLKAQNSELASTANMLREQVAQLKQKVM   |
| 1FQ1           | EIDQLFRIFRTL                                               |
| 1FQJ           | DAAQTHIYMLMKKDSYARYLK                                      |
| 1FQJ           | RMHESMKLFDISICN                                            |
| 1FQJ           | RSERKKWIHC                                                 |
| 1FQJ           | LHELAQY                                                    |
| 1FQJ           | DAAQTHIYMLMKKDSYARYLKS                                     |
| 1FQV           | EEEEAQVRKE                                                 |
| 1FQV           | PEEIRKTF                                                   |
| 1FQV           | KRWYRLAS                                                   |

| A. PDB<br>CODE | M. RESOLUTION |
|----------------|---------------|
| IDX5           | 2.3           |
| IDX5           | 2.3           |
| 1E3A           | 1.8           |
| 1E3A           | 1.8           |
| 1E3A           | 1.8           |
| 1E6E           | 2.3           |
| 1E7P           | 3.1           |
| 1E7P           | 3.1           |
| 1E7P           | 3.1           |
| 1E7P           | 3.1           |
| 1E7P           | 3.1           |
| 1E7P           | 3.1           |
| 1E80           | 3.2           |
| 1E80           | 3.2           |
| 1E80           | 3.2           |
| 1EAY           | 2             |
| 1EAY           | 2             |
| 1EBD           | 2.6           |
| 1EER           | 1.9           |
| 1EJH           | 2.2           |
| 1EJH           | 2.2           |
| 1EJR           | 2             |
| 1EM8           | 2.1           |
| 1EMU           | 1.9           |
| 1F51           | 3             |
| 1F51           | 3             |
| 1F5Q           | 2.5           |
| 1F5Q           | 2.5           |
| 1F5Q           | 2.5           |
| 1F5Q           | 2.5           |
| 1F60           | 1.67          |
| 1F80           | 2.3           |
| 1F80           | 2.3           |
| 1F80           | 2.3           |
| 1F80           | 2.3           |
| 1F93           | 2.6           |
| 1F9E           | 2.9           |
| 1FAV           | 3             |
| 1FBV           | 2.9           |
| 1FG9           | 2.9           |
| 1FM6           | 2.1           |
| 1FM6           | 2.1           |
| 1FM6           | 2.1           |
| 1FM6           | 2.1           |
| 1FM6           | 2.1           |
| 1FOE           | 2.8           |
| 1FOE           | 2.8           |
| 1FOE           | 2.8           |
| 1FOE           | 2.8           |
| 1FOE           | 2.8           |
| 1FOS           | 3.05          |
| 1FOS           | 3.05          |
| 1FQ1           | 3             |
| 1FQJ           | 2.02          |
| 1FQJ           | 2.02          |
| 1FQJ           | 2.02          |
| 1FQJ           | 2.02          |
| 1FQJ           | 2.02          |
| 1FQV           | 2.8           |
| 1FQV           | 2.8           |
| 1FQV           | 2.8           |

| A. PDB CODE | B. INTERFACE CHAINS | C. CHAIN | D. TITLE                                                                                    |
|-------------|---------------------|----------|---------------------------------------------------------------------------------------------|
| 1FQV        | C D                 | D        | INSIGHTS INTO SCF UBIQUITIN LIGASES FROM THE STRUCTURE OF THE SKP1-SKP2 COMPLEX             |
| 1FQV        | I J                 | I        | INSIGHTS INTO SCF UBIQUITIN LIGASES FROM THE STRUCTURE OF THE SKP1-SKP2 COMPLEX             |
| 1FQV        | I J                 | J        | INSIGHTS INTO SCF UBIQUITIN LIGASES FROM THE STRUCTURE OF THE SKP1-SKP2 COMPLEX             |
| 1FQV        | K L                 | K        | INSIGHTS INTO SCF UBIQUITIN LIGASES FROM THE STRUCTURE OF THE SKP1-SKP2 COMPLEX             |
| 1FQV        | M N                 | M        | INSIGHTS INTO SCF UBIQUITIN LIGASES FROM THE STRUCTURE OF THE SKP1-SKP2 COMPLEX             |
| 1FS1        | A B                 | A        | INSIGHTS INTO SCF UBIQUITIN LIGASES FROM THE STRUCTURE OF THE SKP1-SKP2 COMPLEX             |
| 1FS1        | C D                 | D        | INSIGHTS INTO SCF UBIQUITIN LIGASES FROM THE STRUCTURE OF THE SKP1-SKP2 COMPLEX             |
| 1FS2        | A B                 | A        | INSIGHTS INTO SCF UBIQUITIN LIGASES FROM THE STRUCTURE OF THE SKP1-SKP2 COMPLEX             |
| 1FS2        | A B                 | B        | INSIGHTS INTO SCF UBIQUITIN LIGASES FROM THE STRUCTURE OF THE SKP1-SKP2 COMPLEX             |
| 1FS2        | A B                 | B        | INSIGHTS INTO SCF UBIQUITIN LIGASES FROM THE STRUCTURE OF THE SKP1-SKP2 COMPLEX             |
| 1FYH        | D E                 | D        | 1:1 COMPLEX BETWEEN AN INTERFERON GAMMA SINGLE-CHAIN VARIANT AND ITS RECEPTOR               |
| 1G1E        | A B                 | A        | NMR STRUCTURE OF THE HUMAN MAD1 TRANSREPRESSION DOMAIN SID IN COMPLEX WITH MAMMAL           |
| 1G1X        | F B                 | B        | STRUCTURE OF RIBOSOMAL PROTEINS S15, S6, S18, AND 16S RIBOSOMAL RNA                         |
| 1G3I        | C I                 | I        | CRYSTAL STRUCTURE OF THE HSLUV PROTEASE-CHAPERONE COMPLEX                                   |
| 1G3N        | A C                 | A        | STRUCTURE OF A P18(INK4C)-CDK6-K-CYCLIN TERNARY COMPLEX                                     |
| 1G3N        | A C                 | C        | STRUCTURE OF A P18(INK4C)-CDK6-K-CYCLIN TERNARY COMPLEX                                     |
| 1G3N        | E G                 | G        | STRUCTURE OF A P18(INK4C)-CDK6-K-CYCLIN TERNARY COMPLEX                                     |
| 1G3N        | E G                 | G        | STRUCTURE OF A P18(INK4C)-CDK6-K-CYCLIN TERNARY COMPLEX                                     |
| 1G4U        | S R                 | S        | CRYSTAL STRUCTURE OF THE SALMONELLA TYROSINE PHOSPHATASE AND GTPASE ACTIVATING PROTI        |
| 1G4Y        | B R                 | B        | 1.60 A CRYSTAL STRUCTURE OF THE GATING DOMAIN FROM SMALL CONDUCTANCE POTASSIUM CHANF        |
| 1G4Y        | B R                 | R        | 1.60 A CRYSTAL STRUCTURE OF THE GATING DOMAIN FROM SMALL CONDUCTANCE POTASSIUM CHANF        |
| 1G73        | B D                 | B        | CRYSTAL STRUCTURE OF SMAC BOUND TO XIAP-BIR3 DOMAIN                                         |
| 1GH6        | A B                 | B        | RETINOBLASTOMA POCKET COMPLEXED WITH SV40 LARGE T ANTIGEN                                   |
| 1GHQ        | A B                 | A        | CR2-C3D COMPLEX STRUCTURE                                                                   |
| 1GPQ        | A D                 | A        | STRUCTURE OF IVY COMPLEXED WITH ITS TARGET, HEWL                                            |
| 1GX7        | A D                 | A        | BEST MODEL OF THE ELECTRON TRANSFER COMPLEX BETWEEN CYTOCHROME C3 AND [FE]-HYDROGE          |
| 1GZL        | B D                 | B        | CRYSTAL STRUCTURE OF C14LINKMID/IQN17: A CROSS-LINKED INHIBITOR OF HIV-1 ENTRY BOUND TO 1   |
| 1GZL        | B D                 | D        | CRYSTAL STRUCTURE OF C14LINKMID/IQN17: A CROSS-LINKED INHIBITOR OF HIV-1 ENTRY BOUND TO 1   |
| 1GZS        | B A                 | A        | CRYSTAL STRUCTURE OF THE COMPLEX BETWEEN THE GEF DOMAIN OF THE SALMONELLA TYPHIMUR          |
| 1GZS        | B A                 | B        | CRYSTAL STRUCTURE OF THE COMPLEX BETWEEN THE GEF DOMAIN OF THE SALMONELLA TYPHIMUR          |
| 1GZS        | D C                 | C        | CRYSTAL STRUCTURE OF THE COMPLEX BETWEEN THE GEF DOMAIN OF THE SALMONELLA TYPHIMUR          |
| 1H1V        | G A                 | G        | GELSOLIN G4-G6/ACTIN COMPLEX                                                                |
| 1H2M        | A S                 | A        | FACTOR INHIBITING HIF-1 ALPHA IN COMPLEX WITH HIF-1 ALPHA FRAGMENT PEPTIDE                  |
| 1H2S        | A B                 | A        | MOLECULAR BASIS OF TRANSMENBRANE SIGNALLING BY SENSORY RHODOPSIN II-TRANSDUCER COM          |
| 1H2S        | A B                 | B        | MOLECULAR BASIS OF TRANSMENBRANE SIGNALLING BY SENSORY RHODOPSIN II-TRANSDUCER COM          |
| 1H30        | A B                 | A        | CRYSTAL STRUCTURE OF THE HUMAN TAF4-TAF12 (TAFII135-TAFII20) COMPLEX                        |
| 1H30        | A B                 | A        | CRYSTAL STRUCTURE OF THE HUMAN TAF4-TAF12 (TAFII135-TAFII20) COMPLEX                        |
| 1H30        | C D                 | C        | CRYSTAL STRUCTURE OF THE HUMAN TAF4-TAF12 (TAFII135-TAFII20) COMPLEX                        |
| 1H30        | C D                 | D        | CRYSTAL STRUCTURE OF THE HUMAN TAF4-TAF12 (TAFII135-TAFII20) COMPLEX                        |
| 1H4L        | B E                 | B        | STRUCTURE AND REGULATION OF THE CDK5-P25(NCK5A) COMPLEX                                     |
| 1H59        | A B                 | A        | COMPLEX OF IGFBP-5 WITH IGF-I                                                               |
| 1H6K        | A X                 | X        | NUCLEAR CAP BINDING COMPLEX                                                                 |
| 1H6K        | B Y                 | Y        | NUCLEAR CAP BINDING COMPLEX                                                                 |
| 1H6K        | B Y                 | Y        | NUCLEAR CAP BINDING COMPLEX                                                                 |
| 1H6K        | B Y                 | Y        | NUCLEAR CAP BINDING COMPLEX                                                                 |
| 1HBX        | B G                 | B        | TERNARY COMPLEX OF SAP-1 AND SRF WITH SPECIFIC SRE DNA                                      |
| 1HE1        | A C                 | A        | CRYSTAL STRUCTURE OF THE COMPLEX BETWEEN THE GAP DOMAIN OF THE PSEUDOMONAS AERUGIN          |
| 1HE1        | A C                 | A        | CRYSTAL STRUCTURE OF THE COMPLEX BETWEEN THE GAP DOMAIN OF THE PSEUDOMONAS AERUGIN          |
| 1HE1        | B D                 | B        | CRYSTAL STRUCTURE OF THE COMPLEX BETWEEN THE GAP DOMAIN OF THE PSEUDOMONAS AERUGIN          |
| 1HE1        | B D                 | B        | CRYSTAL STRUCTURE OF THE COMPLEX BETWEEN THE GAP DOMAIN OF THE PSEUDOMONAS AERUGIN          |
| 1HH4        | A D                 | D        | RAC1-RHOGDI COMPLEX INVOLVED IN NADPH OXIDASE ACTIVATION                                    |
| 1H1A        | X Y                 | Y        | KALLIKREIN COMPLEXED WITH HIRUSTASIN                                                        |
| 1HL6        | A B                 | B        | A NOVEL MODE OF RBD-PROTEIN RECOGNITION IN THE Y14-MAGO COMPLEX                             |
| 1HL6        | C D                 | C        | A NOVEL MODE OF RBD-PROTEIN RECOGNITION IN THE Y14-MAGO COMPLEX                             |
| 1HLU        | A P                 | A        | STRUCTURE OF BOVINE BETA-ACTIN-ACTIN-PROFILIN COMPLEX WITH ACTIN BOUND ATP PHOSPHATES SOLVE |
| 1HLU        | A P                 | P        | STRUCTURE OF BOVINE BETA-ACTIN-ACTIN-PROFILIN COMPLEX WITH ACTIN BOUND ATP PHOSPHATES SOLVE |
| 1HT1        | B F                 | B        | NUCLEOTIDE-DEPENDENT CONFORMATIONAL CHANGES IN A PROTEASE- ASSOCIATED ATPASE HSLU           |
| 1HWM        | A B                 | A        | EBULIN,ORTHORHOMBIC CRYSTAL FORM MODEL                                                      |
| 1HX1        | A B                 | B        | CRYSTAL STRUCTURE OF A BAG DOMAIN IN COMPLEX WITH THE HSC70 ATPASE DOMAIN                   |
| 1HYR        | B C                 | C        | CRYSTAL STRUCTURE OF HUMAN MICA IN COMPLEX WITH NATURAL KILLER CELL RECEPTOR NKG2D          |
| 1I2M        | A B                 | A        | RAN-RCC1-SO4 COMPLEX                                                                        |
| 1I30        | A B                 | A        | CRYSTAL STRUCTURE OF THE COMPLEX OF XIAP-BIR2 AND CASPASE 3                                 |
| 1I4D        | A D                 | A        | CRYSTAL STRUCTURE ANALYSIS OF RAC1-GDP COMPLEXED WITH ARFAPTIN (P21)                        |
| 1I51        | A B                 | A        | CRYSTAL STRUCTURE OF CASPASE-7 COMPLEXED WITH XIAP                                          |



TABLE S4

Jochim, et al

| A. PDB<br>CODE | E. FUNCTION                          | F. $\Delta\Delta G_{AVG,HELIx}$<br>(KCAL/MOL) | G. $\Delta\Delta G_{SUM,HELIx}$<br>(KCAL/MOL) | H. # HOTSPOT<br>RESIDUES | I. HELIX<br>LENGTH |
|----------------|--------------------------------------|-----------------------------------------------|-----------------------------------------------|--------------------------|--------------------|
| 1FQV           | LIGASE                               | 1.1                                           | 2.2                                           | 2                        | 16                 |
| 1FQV           | LIGASE                               | 1.7                                           | 5.1                                           | 3                        | 8                  |
| 1FQV           | LIGASE                               | 1.9                                           | 3.7                                           | 2                        | 14                 |
| 1FQV           | LIGASE                               | 1.4                                           | 4.2                                           | 3                        | 8                  |
| 1FQV           | LIGASE                               | 1.7                                           | 5.0                                           | 3                        | 7                  |
| 1FS1           | LIGASE                               | 1.6                                           | 3.1                                           | 2                        | 9                  |
| 1FS1           | LIGASE                               | 1.2                                           | 2.3                                           | 2                        | 8                  |
| 1FS2           | LIGASE                               | 1.3                                           | 2.6                                           | 2                        | 8                  |
| 1FS2           | LIGASE                               | 1.3                                           | 2.5                                           | 2                        | 16                 |
| 1FS2           | LIGASE                               | 1.3                                           | 2.6                                           | 2                        | 8                  |
| 1FYH           | IMMUNE SYSTEM                        | 1.2                                           | 2.3                                           | 2                        | 7                  |
| 1G1E           | TRANSCRIPTION                        | 1.4                                           | 2.8                                           | 2                        | 13                 |
| 1G1X           | RIBOSOME                             | 1.4                                           | 2.8                                           | 2                        | 11                 |
| 1G3I           | CHAPERONE/HYDROLASE                  | 1.1                                           | 2.2                                           | 2                        | 11                 |
| 1G3N           | CELL CYCLE, SIGNALING PROTEIN        | 1.7                                           | 5.1                                           | 3                        | 17                 |
| 1G3N           | CELL CYCLE, SIGNALING PROTEIN        | 1.2                                           | 2.4                                           | 2                        | 17                 |
| 1G3N           | CELL CYCLE, SIGNALING PROTEIN        | 1.3                                           | 2.5                                           | 2                        | 17                 |
| 1G3N           | CELL CYCLE, SIGNALING PROTEIN        | 1.8                                           | 5.4                                           | 3                        | 15                 |
| 1G4U           | SIGNALING PROTEIN                    | 1.1                                           | 2.2                                           | 2                        | 14                 |
| 1G4Y           | SIGNALING PROTEIN                    | 1.3                                           | 4.0                                           | 3                        | 44                 |
| 1G4Y           | SIGNALING PROTEIN                    | 1.9                                           | 3.8                                           | 2                        | 11                 |
| 1G73           | APOPTOSIS/APOPTOSIS INHIBITOR        | 1.6                                           | 4.7                                           | 3                        | 48                 |
| 1GH6           | ANTITUMOR PROTEIN                    | 1.5                                           | 3.0                                           | 2                        | 11                 |
| 1GHQ           | IMMUNE SYSTEM/VIRAL PROTEIN RECEPTOR | 1.5                                           | 4.4                                           | 3                        | 15                 |
| 1GPQ           | HYDROLASE/INHIBITOR                  | 1.9                                           | 3.7                                           | 2                        | 5                  |
| 1GX7           | OXIDOREDUCTASE                       | 1.7                                           | 3.4                                           | 2                        | 11                 |
| 1GZL           | GLYCOPROTEIN                         | 1.7                                           | 5.1                                           | 3                        | 44                 |
| 1GZL           | GLYCOPROTEIN                         | 1.6                                           | 3.1                                           | 2                        | 11                 |
| 1GZS           | TOXIN/CELL CYCLE                     | 1.5                                           | 5.8                                           | 4                        | 9                  |
| 1GZS           | TOXIN/CELL CYCLE                     | 1.7                                           | 5.1                                           | 3                        | 30                 |
| 1GZS           | TOXIN/CELL CYCLE                     | 1.7                                           | 3.4                                           | 2                        | 9                  |
| 1H1V           | ACTIN-BINDING                        | 1.3                                           | 2.5                                           | 2                        | 18                 |
| 1H2M           | TRANSCRIPTION ACTIVATOR/INHIBITOR    | 1.7                                           | 3.4                                           | 2                        | 9                  |
| 1H2S           | MEMBRANE PROTEIN                     | 1.2                                           | 2.4                                           | 2                        | 28                 |
| 1H2S           | MEMBRANE PROTEIN                     | 1.4                                           | 2.7                                           | 2                        | 27                 |
| 1H3O           | TRANSCRIPTION/TBP-ASSOCIATED FACTORS | 1.3                                           | 3.8                                           | 3                        | 14                 |
| 1H3O           | TRANSCRIPTION/TBP-ASSOCIATED FACTORS | 1.6                                           | 11.4                                          | 7                        | 22                 |
| 1H3O           | TRANSCRIPTION/TBP-ASSOCIATED FACTORS | 1.7                                           | 6.9                                           | 4                        | 24                 |
| 1H3O           | TRANSCRIPTION/TBP-ASSOCIATED FACTORS | 1.9                                           | 3.7                                           | 2                        | 10                 |
| 1H4L           | KINASE/KINASE ACTIVATOR              | 1.5                                           | 3.0                                           | 2                        | 14                 |
| 1H59           | INSULIN                              | 1.3                                           | 2.5                                           | 2                        | 7                  |
| 1H6K           | NUCLEAR PROTEIN                      | 1.8                                           | 3.6                                           | 2                        | 11                 |
| 1H6K           | NUCLEAR PROTEIN                      | 1.8                                           | 3.6                                           | 2                        | 11                 |
| 1H6K           | NUCLEAR PROTEIN                      | 1.5                                           | 3.0                                           | 2                        | 12                 |
| 1HBX           | GENE REGULATION                      | 1.4                                           | 2.7                                           | 2                        | 26                 |
| 1HE1           | SIGNALING PROTEIN                    | 1.8                                           | 3.5                                           | 2                        | 16                 |
| 1HE1           | SIGNALING PROTEIN                    | 1.7                                           | 6.7                                           | 4                        | 25                 |
| 1HE1           | SIGNALING PROTEIN                    | 1.8                                           | 3.5                                           | 2                        | 15                 |
| 1HE1           | SIGNALING PROTEIN                    | 1.6                                           | 3.2                                           | 2                        | 24                 |
| 1HH4           | SIGNALING PROTEIN/INHIBITOR          | 1.9                                           | 3.7                                           | 2                        | 12                 |
| 1H1A           | COMPLEX (PROTEASE/INHIBITOR)         | 1.9                                           | 5.8                                           | 3                        | 11                 |
| 1HL6           | SIGNAL PROTEIN                       | 1.2                                           | 3.6                                           | 3                        | 15                 |
| 1HL6           | SIGNAL PROTEIN                       | 1.6                                           | 6.3                                           | 4                        | 13                 |
| 1HLU           | COMPLEX (ACETYLTATION/ACTIN-BINDING) | 1.5                                           | 3.0                                           | 2                        | 5                  |
| 1HLU           | COMPLEX (ACETYLTATION/ACTIN-BINDING) | 1.5                                           | 5.8                                           | 4                        | 18                 |
| 1HT1           | CHAPERONE                            | 1.3                                           | 4.0                                           | 3                        | 12                 |
| 1HWM           | HYDROLASE                            | 1.7                                           | 5.1                                           | 3                        | 13                 |
| 1HX1           | CHAPERONE/CHAPERONE INHIBITOR        | 1.7                                           | 3.3                                           | 2                        | 19                 |
| 1HYR           | IMMUNE SYSTEM                        | 1.1                                           | 2.1                                           | 2                        | 21                 |
| 1I2M           | CELL CYCLE                           | 1.9                                           | 7.7                                           | 4                        | 13                 |
| 1I3O           | APOPTOSIS                            | 1.7                                           | 3.3                                           | 2                        | 15                 |
| 1I4D           | SIGNALING PROTEIN                    | 1.6                                           | 3.2                                           | 2                        | 50                 |
| 1I51           | HYDROLASE/HYDROLASE INHIBITOR        | 1.5                                           | 4.5                                           | 3                        | 16                 |

TABLE S4

Jochim, et al

| A. PDB<br>CODE | J. HELIX START<br>RESIDUE # | K. HELIX END<br>RESIDUE # |
|----------------|-----------------------------|---------------------------|
| 1FQV           | 113                         | 128                       |
| 1FQV           | 137                         | 144                       |
| 1FQV           | 97                          | 110                       |
| 1FQV           | 137                         | 144                       |
| 1FQV           | 137                         | 143                       |
| 1FS1           | 114                         | 122                       |
| 1FS1           | 132                         | 139                       |
| 1FS2           | 137                         | 144                       |
| 1FS2           | 113                         | 128                       |
| 1FS2           | 132                         | 139                       |
| 1FYH           | 313                         | 319                       |
| 1G1E           | 9                           | 21                        |
| 1G1X           | 4                           | 14                        |
| 1G3I           | 71                          | 81                        |
| 1G3N           | 56                          | 72                        |
| 1G3N           | 93                          | 109                       |
| 1G3N           | 93                          | 109                       |
| 1G3N           | 128                         | 142                       |
| 1G4U           | 207                         | 220                       |
| 1G4Y           | 446                         | 490                       |
| 1G4Y           | 45                          | 55                        |
| 1G73           | 72                          | 119                       |
| 1GH6           | 721                         | 731                       |
| 1GHQ           | 104                         | 118                       |
| 1GPQ           | 118                         | 122                       |
| 1GX7           | 108                         | 118                       |
| 1GZL           | 2                           | 45                        |
| 1GZL           | 629                         | 639                       |
| 1GZS           | 65                          | 73                        |
| 1GZS           | 104                         | 133                       |
| 1GZS           | 65                          | 73                        |
| 1H1V           | 473                         | 490                       |
| 1H2M           | 156                         | 164                       |
| 1H2S           | 154                         | 181                       |
| 1H2S           | 25                          | 51                        |
| 1H3O           | 873                         | 886                       |
| 1H3O           | 896                         | 917                       |
| 1H3O           | 894                         | 917                       |
| 1H3O           | 60                          | 69                        |
| 1H4L           | 44                          | 57                        |
| 1H59           | 54                          | 60                        |
| 1H6K           | 53                          | 63                        |
| 1H6K           | 53                          | 63                        |
| 1H6K           | 91                          | 102                       |
| 1HBX           | 154                         | 179                       |
| 1HE1           | 144                         | 159                       |
| 1HE1           | 96                          | 120                       |
| 1HE1           | 144                         | 158                       |
| 1HE1           | 97                          | 120                       |
| 1HH4           | 346                         | 357                       |
| 1H1A           | 235                         | 245                       |
| 1HL6           | 55                          | 69                        |
| 1HL6           | 17                          | 29                        |
| 1HLU           | 370                         | 374                       |
| 1HLU           | 120                         | 137                       |
| 1HT1           | 55                          | 66                        |
| 1HWM           | 168                         | 180                       |
| 1HX1           | 204                         | 222                       |
| 1HYR           | 154                         | 174                       |
| 1I2M           | 101                         | 113                       |
| 1I3O           | 182                         | 196                       |
| 1I4D           | 29                          | 78                        |
| 1I51           | 90                          | 105                       |

| A. PDB<br>CODE | L. HELIX SEQUENCE                                  |
|----------------|----------------------------------------------------|
| 1FQV           | KGLLDVTCKTVANMIK                                   |
| 1FQV           | KRWYRLAS                                           |
| 1FQV           | QGTLFELILAANYL                                     |
| 1FQV           | KRWYRLAS                                           |
| 1FQV           | KRWYRLA                                            |
| 1FS1           | DELLLGIFS                                          |
| 1FS1           | PEEIRKTF                                           |
| 1FS2           | KRWYRLAS                                           |
| 1FS2           | KGLLDVTCKTVANMIK                                   |
| 1FS2           | PEEIRKTF                                           |
| 1FYH           | LIQVMAE                                            |
| 1G1E           | IQMLLEAADYLER                                      |
| 1G1X           | KEEKQKVIQEF                                        |
| 1G3I           | LLKSAVELAKD                                        |
| 1G3N           | LSTIREVAVLRHLETFE                                  |
| 1G3N           | FQKTGSACLLVASKLRS                                  |
| 1G3N           | FQKTGSACLLVASKLRS                                  |
| 1G3N           | RQELIDQEKELEKLEK                                   |
| 1G4U           | PLRSLMTNLQNLNK                                     |
| 1G4Y           | HAKVRKHQRKFLQAIHQLRSVKMEQRKLNQANTLVDLAKTQLH        |
| 1G4Y           | EAELQDMINEV                                        |
| 1G73           | EEDEDEVQVIIGARAEMTSKHQEYLYKLETTWMTAVGLSEMAEAAAYQT  |
| 1GH6           | FKIIVTAYKDL                                        |
| 1GHQ           | SQVLCGAVKWLILEK                                    |
| 1GPQ           | SLENH                                              |
| 1GX7           | PAVRYALGDAF                                        |
| 1GZL           | MKQIEDKIEEIESKQKKIENEIARIKLLQLTVWGIKQLQARIL        |
| 1GZL           | EEWDREIENYT                                        |
| 1GZS           | DRLRPLSYP                                          |
| 1GZS           | PAYASQTREAILSAVYSKNKDQCCNLLISK                     |
| 1GZS           | DRLRPLSYP                                          |
| 1H1V           | QDEVAASAILTAQLDEEL                                 |
| 1H2M           | RKIVMDFLG                                          |
| 1H2S           | SGIKSLYVRLRNLTVILWAIYPIWLLG                        |
| 1H2S           | VFIFVGALTVLFGAIAYGEVTAATAATG                       |
| 1H30           | QAPLQRRILEIGKK                                     |
| 1H30           | VVSYVSHATQQRLQNLVEKISE                             |
| 1H30           | PDVVSYVSHATQQRLQNLVEKISE                           |
| 1H30           | KKKLQDLVRE                                         |
| 1H4L           | VPSSALREICLLKE                                     |
| 1H59           | LRRLEMY                                            |
| 1H6K           | EEQIYELFSKS                                        |
| 1H6K           | EEQIYELFSKS                                        |
| 1H6K           | RADAENAMRYIN                                       |
| 1HBX           | KLRRYTFFSKRKTGIMKKAYELSTLT                         |
| 1HE1           | ALRSLSTALAGIRAGS                                   |
| 1HE1           | SSAVVFKQMVLLQALPMTLKGLDKA                          |
| 1HE1           | ALRSLSTALAGIRAG                                    |
| 1HE1           | SAVVFKQMVLLQALPMTLKGLDKA                           |
| 1HH4           | ESLRKYKEALLG                                       |
| 1H1A           | LDWIDDITEN                                         |
| 1HL6           | QSVMEELKRIIDSE                                     |
| 1HL6           | EDGDQGIVRLKEK                                      |
| 1HLU           | VHRKC                                              |
| 1HLU           | GGMINKKCYEMASHLRRS                                 |
| 1HT1           | TLFELFERKLEM                                       |
| 1HWM           | RYIEQEVRRSLQQ                                      |
| 1HX1           | DRRVKATIEQFMKILEEID                                |
| 1HYR           | KTHYHAMHADCLQELRRYLKS                              |
| 1I2M           | VPNWHRDLVRVCE                                      |
| 1I30           | TDVDAANLRETFRNL                                    |
| 1I4D           | ELELQIELLRETKRKYESVLQLGRALTAHLYSLLQTQHALGDAFADLSQK |
| 1I51           | TDKDAEALFKCFRSLG                                   |

| A. PDB<br>CODE | M. RESOLUTION |
|----------------|---------------|
| 1FQV           | 2.8           |
| 1FQV           | 2.8           |
| 1FQV           | 2.8           |
| 1FQV           | 2.8           |
| 1FQV           | 2.8           |
| 1FS1           | 1.8           |
| 1FS1           | 1.8           |
| 1FS2           | 2.9           |
| 1FS2           | 2.9           |
| 1FS2           | 2.9           |
| 1FYH           | 2.04          |
| 1G1E           | NOT APP       |
| 1G1X           | 2.6           |
| 1G3I           | 3.41          |
| 1G3N           | 2.9           |
| 1G3N           | 2.9           |
| 1G3N           | 2.9           |
| 1G3N           | 2.9           |
| 1G4U           | 2.3           |
| 1G4Y           | 1.6           |
| 1G4Y           | 1.6           |
| 1G73           | 2             |
| 1GH6           | 3.2           |
| 1GHQ           | 2.04          |
| 1GPQ           | 1.6           |
| 1GX7           | NOT APP       |
| 1GZL           | 1.8           |
| 1GZL           | 1.8           |
| 1GZS           | 2.3           |
| 1GZS           | 2.3           |
| 1GZS           | 2.3           |
| 1H1V           | 3             |
| 1H2M           | 2.5           |
| 1H2S           | 1.93          |
| 1H2S           | 1.93          |
| 1H3O           | 2.3           |
| 1H3O           | 2.3           |
| 1H3O           | 2.3           |
| 1H3O           | 2.3           |
| 1H4L           | 2.65          |
| 1H59           | 2.1           |
| 1H6K           | 2             |
| 1H6K           | 2             |
| 1H6K           | 2             |
| 1HBX           | 3.15          |
| 1HE1           | 2             |
| 1HE1           | 2             |
| 1HE1           | 2             |
| 1HE1           | 2             |
| 1HH4           | 2.7           |
| 1H1A           | 2.4           |
| 1HL6           | 2.5           |
| 1HL6           | 2.5           |
| 1HLU           | 2.65          |
| 1HLU           | 2.65          |
| 1HT1           | 2.8           |
| 1HWM           | 2.8           |
| 1HX1           | 1.9           |
| 1HYR           | 2.7           |
| 1I2M           | 1.76          |
| 1I3O           | 2.7           |
| 1I4D           | 2.5           |
| 1I51           | 2.45          |

TABLE S4

Jochim, et al

| A. PDB CODE | B. INTERFACE CHAINS | C. CHAIN | D. TITLE                                                                                |
|-------------|---------------------|----------|-----------------------------------------------------------------------------------------|
| 1I51        | A B                 | B        | CRYSTAL STRUCTURE OF CASPASE-7 COMPLEXED WITH XIAP                                      |
| 1I51        | C D                 | D        | CRYSTAL STRUCTURE OF CASPASE-7 COMPLEXED WITH XIAP                                      |
| 1I5K        | A D                 | D        | STRUCTURE AND BINDING DETERMINANTS OF THE RECOMBINANT KRINGLE-2 DOMAIN OF HUMAN PL      |
| 1I5K        | B C                 | C        | STRUCTURE AND BINDING DETERMINANTS OF THE RECOMBINANT KRINGLE-2 DOMAIN OF HUMAN PL      |
| 1I7W        | A B                 | A        | BETA-CATENIN/PHOSPHORYLATED E-CADHERIN COMPLEX                                          |
| 1I7W        | C D                 | C        | BETA-CATENIN/PHOSPHORYLATED E-CADHERIN COMPLEX                                          |
| 1I7W        | C D                 | D        | BETA-CATENIN/PHOSPHORYLATED E-CADHERIN COMPLEX                                          |
| 1I1B1       | A E                 | A        | CRYSTAL STRUCTURE OF THE 14-3-3 ZETA:SEROTONIN N- ACETYLTRANSFERASE COMPLEX             |
| 1I1B1       | A E                 | A        | CRYSTAL STRUCTURE OF THE 14-3-3 ZETA:SEROTONIN N- ACETYLTRANSFERASE COMPLEX             |
| 1I1B1       | C G                 | C        | CRYSTAL STRUCTURE OF THE 14-3-3 ZETA:SEROTONIN N- ACETYLTRANSFERASE COMPLEX             |
| 1I1B1       | D H                 | D        | CRYSTAL STRUCTURE OF THE 14-3-3 ZETA:SEROTONIN N- ACETYLTRANSFERASE COMPLEX             |
| 1I1BR       | A B                 | A        | COMPLEX OF RAN WITH IMPORTIN BETA                                                       |
| 1I1BR       | A B                 | B        | COMPLEX OF RAN WITH IMPORTIN BETA                                                       |
| 1I1BR       | A B                 | B        | COMPLEX OF RAN WITH IMPORTIN BETA                                                       |
| 1I1BR       | C D                 | C        | COMPLEX OF RAN WITH IMPORTIN BETA                                                       |
| 1I1BR       | C D                 | D        | COMPLEX OF RAN WITH IMPORTIN BETA                                                       |
| 1I1HF       | A B                 | A        | INTEGRATION HOST FACTOR/DNA COMPLEX                                                     |
| 1I1HF       | A B                 | B        | INTEGRATION HOST FACTOR/DNA COMPLEX                                                     |
| 1I1I8       | A B                 | A        | CRYSTAL STRUCTURE OF THE P. FURIOSUS RAD50 ATPASE DOMAIN                                |
| 1I1I8       | A B                 | B        | CRYSTAL STRUCTURE OF THE P. FURIOSUS RAD50 ATPASE DOMAIN                                |
| 1I1Q5       | A B                 | A        | CALMODULIN/NEMATODE CA2+/CALMODULIN DEPENDENT KINASE KINASE FRAGMENT                    |
| 1I1Q5       | A B                 | A        | CALMODULIN/NEMATODE CA2+/CALMODULIN DEPENDENT KINASE KINASE FRAGMENT                    |
| 1I1Q5       | A B                 | B        | CALMODULIN/NEMATODE CA2+/CALMODULIN DEPENDENT KINASE KINASE FRAGMENT                    |
| 1I1WQ       | A B                 | A        | CRYSTAL STRUCTURE OF MARCKS CALMODULIN BINDING DOMAIN PEPTIDE COMPLEXED WITH CA2+/(     |
| 1I1WQ       | A B                 | A        | CRYSTAL STRUCTURE OF MARCKS CALMODULIN BINDING DOMAIN PEPTIDE COMPLEXED WITH CA2+/(     |
| 1I1XR       | B C                 | B        | RUVA-RUVB COMPLEX                                                                       |
| 1I1XS       | A B                 | A        | STRUCTURE OF RUVB COMPLEXED WITH RUVA DOMAIN III                                        |
| 1I1YJ       | A B                 | A        | STRUCTURE OF A BRCA2-DSS1 COMPLEX                                                       |
| 1I1YJ       | C D                 | C        | STRUCTURE OF A BRCA2-DSS1 COMPLEX                                                       |
| 1I1YJ       | C D                 | D        | STRUCTURE OF A BRCA2-DSS1 COMPLEX                                                       |
| 1I1YJ       | C D                 | D        | STRUCTURE OF A BRCA2-DSS1 COMPLEX                                                       |
| 1J19        | A B                 | A        | CRYSTAL STRUCTURE OF THE RADXIN FERM DOMAIN COMPLEXED WITH THE ICAM-2 CYTOPLASMIC PI    |
| 1J1D        | A B                 | A        | CRYSTAL STRUCTURE OF THE 46KDA DOMAIN OF HUMAN CARDIAC TROPONIN IN THE CA2+ SATURATE    |
| 1J1D        | A B                 | B        | CRYSTAL STRUCTURE OF THE 46KDA DOMAIN OF HUMAN CARDIAC TROPONIN IN THE CA2+ SATURATE    |
| 1J1D        | A C                 | A        | CRYSTAL STRUCTURE OF THE 46KDA DOMAIN OF HUMAN CARDIAC TROPONIN IN THE CA2+ SATURATE    |
| 1J1D        | A C                 | C        | CRYSTAL STRUCTURE OF THE 46KDA DOMAIN OF HUMAN CARDIAC TROPONIN IN THE CA2+ SATURATE    |
| 1J1D        | B C                 | B        | CRYSTAL STRUCTURE OF THE 46KDA DOMAIN OF HUMAN CARDIAC TROPONIN IN THE CA2+ SATURATE    |
| 1J1D        | B C                 | B        | CRYSTAL STRUCTURE OF THE 46KDA DOMAIN OF HUMAN CARDIAC TROPONIN IN THE CA2+ SATURATE    |
| 1J1D        | B C                 | C        | CRYSTAL STRUCTURE OF THE 46KDA DOMAIN OF HUMAN CARDIAC TROPONIN IN THE CA2+ SATURATE    |
| 1J1D        | D E                 | D        | CRYSTAL STRUCTURE OF THE 46KDA DOMAIN OF HUMAN CARDIAC TROPONIN IN THE CA2+ SATURATE    |
| 1J1D        | D F                 | D        | CRYSTAL STRUCTURE OF THE 46KDA DOMAIN OF HUMAN CARDIAC TROPONIN IN THE CA2+ SATURATE    |
| 1J1D        | D F                 | D        | CRYSTAL STRUCTURE OF THE 46KDA DOMAIN OF HUMAN CARDIAC TROPONIN IN THE CA2+ SATURATE    |
| 1J1D        | D F                 | F        | CRYSTAL STRUCTURE OF THE 46KDA DOMAIN OF HUMAN CARDIAC TROPONIN IN THE CA2+ SATURATE    |
| 1J1D        | D F                 | F        | CRYSTAL STRUCTURE OF THE 46KDA DOMAIN OF HUMAN CARDIAC TROPONIN IN THE CA2+ SATURATE    |
| 1J1D        | E F                 | E        | CRYSTAL STRUCTURE OF THE 46KDA DOMAIN OF HUMAN CARDIAC TROPONIN IN THE CA2+ SATURATE    |
| 1J1D        | E F                 | F        | CRYSTAL STRUCTURE OF THE 46KDA DOMAIN OF HUMAN CARDIAC TROPONIN IN THE CA2+ SATURATE    |
| 1J34        | A B                 | A        | CRYSTAL STRUCTURE OF MG(II)-AND CA(II)-BOUND GLA DOMAIN OF FACTOR IX COMPLEXED WITH BIN |
| 1JCH        | A B                 | B        | CRYSTAL STRUCTURE OF COLICIN E3 IN COMPLEX WITH ITS IMMUNITY PROTEIN                    |
| 1JCH        | C D                 | D        | CRYSTAL STRUCTURE OF COLICIN E3 IN COMPLEX WITH ITS IMMUNITY PROTEIN                    |
| 1JEK        | A B                 | A        | VISNA TM CORE STRUCTURE                                                                 |
| 1JEY        | A B                 | A        | CRYSTAL STRUCTURE OF THE KU HETERODIMER BOUND TO DNA                                    |
| 1JEY        | A B                 | A        | CRYSTAL STRUCTURE OF THE KU HETERODIMER BOUND TO DNA                                    |
| 1JEY        | A B                 | A        | CRYSTAL STRUCTURE OF THE KU HETERODIMER BOUND TO DNA                                    |
| 1JEY        | A B                 | A        | CRYSTAL STRUCTURE OF THE KU HETERODIMER BOUND TO DNA                                    |
| 1JEY        | A B                 | B        | CRYSTAL STRUCTURE OF THE KU HETERODIMER BOUND TO DNA                                    |
| 1JFI        | A B                 | A        | CRYSTAL STRUCTURE OF THE NC2-TBP-DNA TERNARY COMPLEX                                    |
| 1JFI        | A B                 | B        | CRYSTAL STRUCTURE OF THE NC2-TBP-DNA TERNARY COMPLEX                                    |
| 1JFI        | A B                 | B        | CRYSTAL STRUCTURE OF THE NC2-TBP-DNA TERNARY COMPLEX                                    |
| 1JIW        | P I                 | P        | CRYSTAL STRUCTURE OF THE APR-APRIN COMPLEX                                              |
| 1JMO        | H A                 | A        | CRYSTAL STRUCTURE OF THE HEPARIN COFACTOR II-S195A THROMBIN COMPLEX                     |
| 1JMO        | L H                 | L        | CRYSTAL STRUCTURE OF THE HEPARIN COFACTOR II-S195A THROMBIN COMPLEX                     |
| 1JMU        | B G                 | G        | CRYSTAL STRUCTURE OF THE REOVIRUS MU1/SIGMA3 COMPLEX                                    |
| 1JMU        | E F                 | F        | CRYSTAL STRUCTURE OF THE REOVIRUS MU1/SIGMA3 COMPLEX                                    |

TABLE S4

Jochim, et al

| A. PDB<br>CODE | E. FUNCTION                           | F. $\Delta\Delta G_{\text{AVG,HELIX}}$<br>(KCAL/MOL) | G. $\Delta\Delta G_{\text{SUM,HELIX}}$<br>(KCAL/MOL) | H. # HOTSPOT<br>RESIDUES | I. HELIX<br>LENGTH |
|----------------|---------------------------------------|------------------------------------------------------|------------------------------------------------------|--------------------------|--------------------|
| 1I51           | HYDROLASE/HYDROLASE INHIBITOR         | 1.2                                                  | 3.7                                                  | 3                        | 13                 |
| 1I51           | HYDROLASE/HYDROLASE INHIBITOR         | 1.6                                                  | 3.1                                                  | 2                        | 13                 |
| 1I5K           | BLOOD CLOTTING                        | 1.2                                                  | 2.4                                                  | 2                        | 22                 |
| 1I5K           | BLOOD CLOTTING                        | 1.7                                                  | 5.2                                                  | 3                        | 22                 |
| 1I7W           | CELL ADHESION                         | 1.7                                                  | 3.3                                                  | 2                        | 17                 |
| 1I7W           | CELL ADHESION                         | 1.2                                                  | 3.5                                                  | 3                        | 10                 |
| 1I7W           | CELL ADHESION                         | 1.2                                                  | 2.4                                                  | 2                        | 10                 |
| 1I1B1          | SIGNALING PROTEIN/TRANSFERASE         | 1.7                                                  | 3.3                                                  | 2                        | 19                 |
| 1I1B1          | SIGNALING PROTEIN/TRANSFERASE         | 1.9                                                  | 3.8                                                  | 2                        | 14                 |
| 1I1B1          | SIGNALING PROTEIN/TRANSFERASE         | 1.4                                                  | 2.7                                                  | 2                        | 31                 |
| 1I1B1          | SIGNALING PROTEIN/TRANSFERASE         | 1.3                                                  | 2.5                                                  | 2                        | 21                 |
| 1I1BR          | CELL CYCLE,TRANSLATION                | 1.2                                                  | 2.3                                                  | 2                        | 10                 |
| 1I1BR          | CELL CYCLE,TRANSLATION                | 1.6                                                  | 3.1                                                  | 2                        | 18                 |
| 1I1BR          | CELL CYCLE,TRANSLATION                | 1.4                                                  | 2.8                                                  | 2                        | 18                 |
| 1I1BR          | CELL CYCLE,TRANSLATION                | 1.6                                                  | 3.1                                                  | 2                        | 14                 |
| 1I1BR          | CELL CYCLE,TRANSLATION                | 1.3                                                  | 2.6                                                  | 2                        | 27                 |
| 1I1HF          | TRANSCRIPTION/DNA                     | 1.9                                                  | 3.8                                                  | 2                        | 9                  |
| 1I1HF          | TRANSCRIPTION/DNA                     | 1.5                                                  | 3.0                                                  | 2                        | 12                 |
| 1I1I8          | REPLICATION                           | 1.5                                                  | 9.2                                                  | 6                        | 32                 |
| 1I1I8          | REPLICATION                           | 1.4                                                  | 2.8                                                  | 2                        | 11                 |
| 1I1Q5          | METAL BINDING PROTEIN/PROTEIN BINDING | 1.9                                                  | 3.8                                                  | 2                        | 11                 |
| 1I1Q5          | METAL BINDING PROTEIN/PROTEIN BINDING | 1.2                                                  | 2.4                                                  | 2                        | 15                 |
| 1I1Q5          | METAL BINDING PROTEIN/PROTEIN BINDING | 1.8                                                  | 10.9                                                 | 6                        | 13                 |
| 1I1WQ          | METAL BINDING PROTEIN/PROTEIN BINDING | 1.8                                                  | 7.3                                                  | 4                        | 12                 |
| 1I1WQ          | METAL BINDING PROTEIN/PROTEIN BINDING | 1.4                                                  | 4.3                                                  | 3                        | 15                 |
| 1I1XR          | HYDROLASE                             | 1.4                                                  | 2.7                                                  | 2                        | 11                 |
| 1I1XS          | HYDROLASE                             | 1.2                                                  | 2.4                                                  | 2                        | 10                 |
| 1I1YJ          | GENE REGULATION/ANTITUMOR PROTEIN     | 1.4                                                  | 2.8                                                  | 2                        | 5                  |
| 1I1YJ          | GENE REGULATION/ANTITUMOR PROTEIN     | 1.6                                                  | 3.2                                                  | 2                        | 5                  |
| 1I1YJ          | GENE REGULATION/ANTITUMOR PROTEIN     | 1.2                                                  | 3.5                                                  | 3                        | 18                 |
| 1I1YJ          | GENE REGULATION/ANTITUMOR PROTEIN     | 1.0                                                  | 2.0                                                  | 2                        | 22                 |
| 1J19           | CELL ADHESION                         | 1.2                                                  | 2.3                                                  | 2                        | 21                 |
| 1J1D           | CONTRACTILE PROTEIN                   | 1.5                                                  | 4.6                                                  | 3                        | 12                 |
| 1J1D           | CONTRACTILE PROTEIN                   | 1.6                                                  | 3.1                                                  | 2                        | 45                 |
| 1J1D           | CONTRACTILE PROTEIN                   | 1.6                                                  | 3.1                                                  | 2                        | 12                 |
| 1J1D           | CONTRACTILE PROTEIN                   | 1.4                                                  | 6.9                                                  | 5                        | 20                 |
| 1J1D           | CONTRACTILE PROTEIN                   | 1.8                                                  | 21.6                                                 | 12                       | 45                 |
| 1J1D           | CONTRACTILE PROTEIN                   | 1.8                                                  | 3.6                                                  | 2                        | 21                 |
| 1J1D           | CONTRACTILE PROTEIN                   | 1.6                                                  | 13.1                                                 | 8                        | 47                 |
| 1J1D           | CONTRACTILE PROTEIN                   | 1.3                                                  | 2.5                                                  | 2                        | 12                 |
| 1J1D           | CONTRACTILE PROTEIN                   | 1.4                                                  | 2.8                                                  | 2                        | 11                 |
| 1J1D           | CONTRACTILE PROTEIN                   | 1.5                                                  | 3.0                                                  | 2                        | 12                 |
| 1J1D           | CONTRACTILE PROTEIN                   | 1.3                                                  | 2.5                                                  | 2                        | 6                  |
| 1J1D           | CONTRACTILE PROTEIN                   | 1.8                                                  | 10.8                                                 | 6                        | 37                 |
| 1J1D           | CONTRACTILE PROTEIN                   | 1.8                                                  | 20.3                                                 | 11                       | 46                 |
| 1J1D           | CONTRACTILE PROTEIN                   | 1.7                                                  | 27.5                                                 | 16                       | 48                 |
| 1J34           | PROTEIN BINDING/BLOOD CLOTTING        | 1.5                                                  | 2.9                                                  | 2                        | 10                 |
| 1JCH           | RIBOSOME INHIBITOR, HYDROLASE         | 1.6                                                  | 4.8                                                  | 3                        | 8                  |
| 1JCH           | RIBOSOME INHIBITOR, HYDROLASE         | 1.6                                                  | 4.8                                                  | 3                        | 8                  |
| 1JEK           | VIRAL PROTEIN                         | 1.8                                                  | 5.4                                                  | 3                        | 39                 |
| 1JEY           | DNA BINDING PROTEIN/DNA               | 1.4                                                  | 4.2                                                  | 3                        | 10                 |
| 1JEY           | DNA BINDING PROTEIN/DNA               | 1.7                                                  | 6.6                                                  | 4                        | 14                 |
| 1JEY           | DNA BINDING PROTEIN/DNA               | 1.6                                                  | 4.7                                                  | 3                        | 15                 |
| 1JEY           | DNA BINDING PROTEIN/DNA               | 1.7                                                  | 8.3                                                  | 5                        | 15                 |
| 1JEY           | DNA BINDING PROTEIN/DNA               | 1.6                                                  | 8.2                                                  | 5                        | 14                 |
| 1JFI           | TRANSCRIPTION/DNA                     | 1.8                                                  | 12.7                                                 | 7                        | 27                 |
| 1JFI           | TRANSCRIPTION/DNA                     | 1.1                                                  | 2.1                                                  | 2                        | 12                 |
| 1JFI           | TRANSCRIPTION/DNA                     | 1.5                                                  | 3.0                                                  | 2                        | 12                 |
| 1JIW           | HYDROLASE/HYDROLASE INHIBITOR         | 1.9                                                  | 5.6                                                  | 3                        | 15                 |
| 1JMO           | BLOOD CLOTTING                        | 1.6                                                  | 4.7                                                  | 3                        | 7                  |
| 1JMO           | BLOOD CLOTTING                        | 1.5                                                  | 4.6                                                  | 3                        | 8                  |
| 1JMU           | VIRAL PROTEIN                         | 1.7                                                  | 3.3                                                  | 2                        | 5                  |
| 1JMU           | VIRAL PROTEIN                         | 1.1                                                  | 2.2                                                  | 2                        | 12                 |

TABLE S4

Jochim, et al

| A. PDB<br>CODE | J. HELIX START<br>RESIDUE # | K. HELIX END<br>RESIDUE # |
|----------------|-----------------------------|---------------------------|
| 1I51           | 240                         | 252                       |
| 1I51           | 240                         | 252                       |
| 1I5K           | 406                         | 427                       |
| 1I5K           | 306                         | 327                       |
| 1I7W           | 375                         | 391                       |
| 1I7W           | 152                         | 161                       |
| 1I7W           | 657                         | 666                       |
| 1IB1           | 165                         | 183                       |
| 1IB1           | 215                         | 228                       |
| 1IB1           | 38                          | 68                        |
| 1IB1           | 112                         | 132                       |
| 1IBR           | 101                         | 110                       |
| 1IBR           | 144                         | 161                       |
| 1IBR           | 15                          | 32                        |
| 1IBR           | 157                         | 170                       |
| 1IBR           | 273                         | 299                       |
| 1IHF           | 85                          | 93                        |
| 1IHF           | 3                           | 14                        |
| 1II8           | 164                         | 195                       |
| 1II8           | 710                         | 720                       |
| 1IQ5           | 83                          | 93                        |
| 1IQ5           | 6                           | 20                        |
| 1IQ5           | 337                         | 349                       |
| 1IWQ           | 118                         | 129                       |
| 1IWQ           | 6                           | 20                        |
| 1IXR           | 179                         | 189                       |
| 1IXS           | 179                         | 188                       |
| 1IYJ           | 58                          | 62                        |
| 1IYJ           | 58                          | 62                        |
| 1IYJ           | 2579                        | 2596                      |
| 1IYJ           | 2547                        | 2568                      |
| 1J19           | 274                         | 294                       |
| 1J1D           | 94                          | 105                       |
| 1J1D           | 226                         | 270                       |
| 1J1D           | 130                         | 141                       |
| 1J1D           | 43                          | 62                        |
| 1J1D           | 226                         | 270                       |
| 1J1D           | 204                         | 224                       |
| 1J1D           | 90                          | 136                       |
| 1J1D           | 94                          | 105                       |
| 1J1D           | 131                         | 141                       |
| 1J1D           | 94                          | 105                       |
| 1J1D           | 151                         | 156                       |
| 1J1D           | 44                          | 80                        |
| 1J1D           | 226                         | 271                       |
| 1J1D           | 90                          | 137                       |
| 1J34           | 23                          | 32                        |
| 1JCH           | 53                          | 60                        |
| 1JCH           | 53                          | 60                        |
| 1JEK           | 547                         | 585                       |
| 1JEY           | 521                         | 530                       |
| 1JEY           | 456                         | 469                       |
| 1JEY           | 481                         | 495                       |
| 1JEY           | 378                         | 392                       |
| 1JEY           | 448                         | 461                       |
| 1JFI           | 32                          | 58                        |
| 1JFI           | 168                         | 179                       |
| 1JFI           | 115                         | 126                       |
| 1JIW           | 169                         | 183                       |
| 1JMO           | 63                          | 69                        |
| 1JMO           | 14                          | 14                        |
| 1JMU           | 331                         | 335                       |
| 1JMU           | 212                         | 223                       |

| A. PDB<br>CODE | L. HELIX SEQUENCE                                 |
|----------------|---------------------------------------------------|
| 1I51           | WVQALCSILEEH                                      |
| 1I51           | WVQALCSILEEH                                      |
| 1I5K           | ADAELQRLKNERHEEAELERLK                            |
| 1I5K           | ADAELQRLKNERHEEAELERLK                            |
| 1I7W           | QRLVQNCLWTLRNLSDA                                 |
| 1I7W           | AIPELTKLLN                                        |
| 1I7W           | IDENLKAADS                                        |
| 1I1B1          | PIRLGLALNFSVFYYEILN                               |
| 1I1B1          | TLIMQLLRDNLTLW                                    |
| 1I1B1          | NEERNLLSVAYKNVVGARRSSWRVVSIEQK                    |
| 1I1B1          | AESKVFYLMKMGDYRYLAEV                              |
| 1I1BR          | VPNWHRDLVR                                        |
| 1I1BR          | EHMKESTLEAIGYICQDI                                |
| 1I1BR          | RLELEAAQKFLERA AVEN                               |
| 1I1BR          | FEKPFLWLARKLIG                                    |
| 1I1BR          | DEVALQGIEFWSNVCDEEMDLAIEASE                       |
| 1I1HF          | QKLKSRVEN                                         |
| 1I1HF          | KSELIERLATQQ                                      |
| 1I1I8          | DKFETAYKKLSELKKTINNRIKEYRDILARTE                  |
| 1I1I8          | ERVKKEIKDLE                                       |
| 1I1Q5          | EEIREAFRVFD                                       |
| 1I1Q5          | EEQIAEFKEAFSLFD                                   |
| 1I1Q5          | LDTLILVKAMGHR                                     |
| 1I1WQ          | DEEVDEMIREAD                                      |
| 1I1WQ          | EEQIAEFKEAFSLFD                                   |
| 1I1XR          | AQDLIKEALKR                                       |
| 1I1XS          | AQDLIKEALK                                        |
| 1I1YJ          | AELEK                                             |
| 1I1YJ          | AELEK                                             |
| 1I1YJ          | PERVLLQLKYRYDVEIDN                                |
| 1I1YJ          | SVWVSNHYRWIVWKLAAAMEFAF                           |
| 1J119          | LRINKRILALCMGNHELYMRR                             |
| 1J11D          | EEELSDLFRMFD                                      |
| 1J11D          | EDQLREKAKELWQTIYNLEAEKFDLQEKFKQQKYEINVLNRIND      |
| 1J11D          | EDDIEELMKDGD                                      |
| 1J11D          | ASRKLQLKTLTLLQIAKQELE                             |
| 1J11D          | EDQLREKAKELWQTIYNLEAEKFDLQEKFKQQKYEINVLNRIND      |
| 1J11D          | EREKKKKILAERRKVLADHDL                             |
| 1J11D          | FAELQDLARQLHARVDK VDEERYDIEAKVTKNITEIADLTQKIFDLR  |
| 1J11D          | EEELSDLFRMFD                                      |
| 1J11D          | DDIEELMKDGD                                       |
| 1J11D          | EEELSDLFRMFD                                      |
| 1J11D          | ADAMMQ                                            |
| 1J11D          | SRKLQLKTLTLLQIAKQELEREAEEERRGEKGRALSTRA           |
| 1J11D          | EDQLREKAKELWQTIYNLEAEKFDLQEKFKQQKYEINVLNRINDN     |
| 1J11D          | FAELQDLARQLHARVDK VDEERYDIEAKVTKNITEIADLTQKIFDLRG |
| 1J34           | WDDAERFCTE                                        |
| 1J1CH          | EWVPLLQP                                          |
| 1J1CH          | EWVPLLQP                                          |
| 1J1EK          | SLANATAAQEVLEASYAMVQHIAKGIRILEARVARVEA            |
| 1J1EY          | LVDEFKELVY                                        |
| 1J1EY          | PEQVGKMKAIVEKL                                    |
| 1J1EY          | PVLQQHFRNLEALAL                                   |
| 1J1EY          | SSTLFSALLIKCLEK                                   |
| 1J1EY          | EAQLNAVDALIDSM                                    |
| 1J1FI          | AAVPVIISRALELFLESLLKKACQVTQ                       |
| 1J1FI          | PEHVIQALESLG                                      |
| 1J1FI          | RAAINKMIKETL                                      |
| 1J1IW          | YGRQTLTHEIGHTLG                                   |
| 1J1MO          | LEKIFSE                                           |
| 1J1MO          | ERELLESY                                          |
| 1J1MU          | APIVL                                             |
| 1J1MU          | MQSVVKLLDDQL                                      |



| A. PDB<br>CODE | M. RESOLUTION |
|----------------|---------------|
| 1I51           | 2.45          |
| 1I51           | 2.45          |
| 1I5K           | 2.7           |
| 1I5K           | 2.7           |
| 1I7W           | 2             |
| 1I7W           | 2             |
| 1I7W           | 2             |
| 1IB1           | 2.7           |
| 1IB1           | 2.7           |
| 1IB1           | 2.7           |
| 1IB1           | 2.7           |
| 1IBR           | 2.3           |
| 1IBR           | 2.3           |
| 1IBR           | 2.3           |
| 1IBR           | 2.3           |
| 1IBR           | 2.3           |
| 1IHF           | 2.2           |
| 1IHF           | 2.2           |
| 1II8           | 3.02          |
| 1II8           | 3.02          |
| 1IQ5           | 1.8           |
| 1IQ5           | 1.8           |
| 1IQ5           | 1.8           |
| 1IWQ           | 2             |
| 1IWQ           | 2             |
| 1IXR           | 3.3           |
| 1IXS           | 3.2           |
| 1IYJ           | 3.4           |
| 1IYJ           | 3.4           |
| 1IYJ           | 3.4           |
| 1IYJ           | 3.4           |
| 1J19           | 2.4           |
| 1J1D           | 2.61          |
| 1J1D           | 2.61          |
| 1J1D           | 2.61          |
| 1J1D           | 2.61          |
| 1J1D           | 2.61          |
| 1J1D           | 2.61          |
| 1J1D           | 2.61          |
| 1J1D           | 2.61          |
| 1J1D           | 2.61          |
| 1J1D           | 2.61          |
| 1J1D           | 2.61          |
| 1J1D           | 2.61          |
| 1J1D           | 2.61          |
| 1J1D           | 2.61          |
| 1J1D           | 2.61          |
| 1J34           | 1.55          |
| 1JCH           | 3.02          |
| 1JCH           | 3.02          |
| 1JEK           | 1.5           |
| 1JEY           | 2.5           |
| 1JEY           | 2.5           |
| 1JEY           | 2.5           |
| 1JEY           | 2.5           |
| 1JEY           | 2.5           |
| 1JFI           | 2.62          |
| 1JFI           | 2.62          |
| 1JFI           | 2.62          |
| 1JW            | 1.74          |
| 1JMO           | 2.2           |
| 1JMO           | 2.2           |
| 1JMU           | 2.8           |
| 1JMU           | 2.8           |

| A. PDB CODE | B. INTERFACE CHAINS | C. CHAIN | D. TITLE                                                                                |
|-------------|---------------------|----------|-----------------------------------------------------------------------------------------|
| 1JN5        | A B                 | A        | STRUCTURAL BASIS FOR THE RECOGNITION OF A NUCLEOPORIN FG- REPEAT BY THE NTF2-LIKE DOMAI |
| 1JOW        | A B                 | A        | CRYSTAL STRUCTURE OF A COMPLEX OF HUMAN CDK6 AND A VIRAL CYCLIN                         |
| 1JPW        | A D                 | A        | CRYSTAL STRUCTURE OF A HUMAN TCF-4 / BETA-CATENIN COMPLEX                               |
| 1JPW        | A D                 | D        | CRYSTAL STRUCTURE OF A HUMAN TCF-4 / BETA-CATENIN COMPLEX                               |
| 1JPW        | B E                 | B        | CRYSTAL STRUCTURE OF A HUMAN TCF-4 / BETA-CATENIN COMPLEX                               |
| 1JPW        | B E                 | B        | CRYSTAL STRUCTURE OF A HUMAN TCF-4 / BETA-CATENIN COMPLEX                               |
| 1JPW        | C F                 | C        | CRYSTAL STRUCTURE OF A HUMAN TCF-4 / BETA-CATENIN COMPLEX                               |
| 1JSU        | A B                 | B        | P27(KIP1)/CYCLIN A/CDK2 COMPLEX                                                         |
| 1JSU        | B C                 | B        | P27(KIP1)/CYCLIN A/CDK2 COMPLEX                                                         |
| 1JSU        | B C                 | B        | P27(KIP1)/CYCLIN A/CDK2 COMPLEX                                                         |
| 1JSU        | B C                 | C        | P27(KIP1)/CYCLIN A/CDK2 COMPLEX                                                         |
| 1JTH        | A B                 | A        | CRYSTAL STRUCTURE AND BIOPHYSICAL PROPERTIES OF A COMPLEX BETWEEN THE N-TERMINAL REG    |
| 1JTH        | A B                 | B        | CRYSTAL STRUCTURE AND BIOPHYSICAL PROPERTIES OF A COMPLEX BETWEEN THE N-TERMINAL REG    |
| 1JTH        | A D                 | A        | CRYSTAL STRUCTURE AND BIOPHYSICAL PROPERTIES OF A COMPLEX BETWEEN THE N-TERMINAL REG    |
| 1JTH        | A D                 | D        | CRYSTAL STRUCTURE AND BIOPHYSICAL PROPERTIES OF A COMPLEX BETWEEN THE N-TERMINAL REG    |
| 1JTH        | C B                 | B        | CRYSTAL STRUCTURE AND BIOPHYSICAL PROPERTIES OF A COMPLEX BETWEEN THE N-TERMINAL REG    |
| 1JTH        | C B                 | C        | CRYSTAL STRUCTURE AND BIOPHYSICAL PROPERTIES OF A COMPLEX BETWEEN THE N-TERMINAL REG    |
| 1JTH        | C D                 | C        | CRYSTAL STRUCTURE AND BIOPHYSICAL PROPERTIES OF A COMPLEX BETWEEN THE N-TERMINAL REG    |
| 1JTH        | C D                 | D        | CRYSTAL STRUCTURE AND BIOPHYSICAL PROPERTIES OF A COMPLEX BETWEEN THE N-TERMINAL REG    |
| 1K3Z        | A D                 | A        | X-RAY CRYSTAL STRUCTURE OF THE IKBB/NF-KB P65 HOMODIMER COMPLEX                         |
| 1K5D        | A B                 | A        | CRYSTAL STRUCTURE OF RAN-GPPNHP-RANBP1-RANGAP COMPLEX                                   |
| 1K74        | A D                 | A        | THE 2.3 ANGSTROM RESOLUTION CRYSTAL STRUCTURE OF THE HETERODIMER OF THE HUMAN PPARG/    |
| 1K74        | A D                 | D        | THE 2.3 ANGSTROM RESOLUTION CRYSTAL STRUCTURE OF THE HETERODIMER OF THE HUMAN PPARG/    |
| 1K74        | D E                 | D        | THE 2.3 ANGSTROM RESOLUTION CRYSTAL STRUCTURE OF THE HETERODIMER OF THE HUMAN PPARG/    |
| 1K74        | D E                 | E        | THE 2.3 ANGSTROM RESOLUTION CRYSTAL STRUCTURE OF THE HETERODIMER OF THE HUMAN PPARG/    |
| 1K7L        | C D                 | D        | THE 2.5 ANGSTROM RESOLUTION CRYSTAL STRUCTURE OF THE HUMAN PPARALPHA LIGAND BINDING     |
| 1K7L        | C F                 | F        | THE 2.5 ANGSTROM RESOLUTION CRYSTAL STRUCTURE OF THE HUMAN PPARALPHA LIGAND BINDING     |
| 1K7L        | G H                 | H        | THE 2.5 ANGSTROM RESOLUTION CRYSTAL STRUCTURE OF THE HUMAN PPARALPHA LIGAND BINDING     |
| 1KBH        | A B                 | A        | MUTUAL SYNERGISTIC FOLDING IN THE INTERACTION BETWEEN NUCLEAR RECEPTOR COACTIVATORS     |
| 1KBH        | A B                 | B        | MUTUAL SYNERGISTIC FOLDING IN THE INTERACTION BETWEEN NUCLEAR RECEPTOR COACTIVATORS     |
| 1KCG        | A C                 | C        | NKG2D IN COMPLEX WITH ULBP3                                                             |
| 1KCG        | B C                 | C        | NKG2D IN COMPLEX WITH ULBP3                                                             |
| 1KDX        | A B                 | A        | KIX DOMAIN OF MOUSE CBP (CREB BINDING PROTEIN) IN COMPLEX WITH PHOSPHORYLATED KINASE I  |
| 1KDX        | A B                 | A        | KIX DOMAIN OF MOUSE CBP (CREB BINDING PROTEIN) IN COMPLEX WITH PHOSPHORYLATED KINASE I  |
| 1KDX        | A B                 | B        | KIX DOMAIN OF MOUSE CBP (CREB BINDING PROTEIN) IN COMPLEX WITH PHOSPHORYLATED KINASE I  |
| 1KDX        | A B                 | B        | KIX DOMAIN OF MOUSE CBP (CREB BINDING PROTEIN) IN COMPLEX WITH PHOSPHORYLATED KINASE I  |
| 1KF9        | A B                 | A        | PHAGE DISPLAY DERIVED VARIANT OF HUMAN GROWTH HORMONE COMPLEXED WITH TWO COPIES OF      |
| 1KF9        | A C                 | A        | PHAGE DISPLAY DERIVED VARIANT OF HUMAN GROWTH HORMONE COMPLEXED WITH TWO COPIES OF      |
| 1KF9        | D F                 | D        | PHAGE DISPLAY DERIVED VARIANT OF HUMAN GROWTH HORMONE COMPLEXED WITH TWO COPIES OF      |
| 1KIL        | A B                 | A        | THREE-DIMENSIONAL STRUCTURE OF THE COMPLEXIN/SNARE COMPLEX                              |
| 1KIL        | A B                 | B        | THREE-DIMENSIONAL STRUCTURE OF THE COMPLEXIN/SNARE COMPLEX                              |
| 1KIL        | A B                 | B        | THREE-DIMENSIONAL STRUCTURE OF THE COMPLEXIN/SNARE COMPLEX                              |
| 1KIL        | A D                 | A        | THREE-DIMENSIONAL STRUCTURE OF THE COMPLEXIN/SNARE COMPLEX                              |
| 1KIL        | A D                 | D        | THREE-DIMENSIONAL STRUCTURE OF THE COMPLEXIN/SNARE COMPLEX                              |
| 1KIL        | A E                 | A        | THREE-DIMENSIONAL STRUCTURE OF THE COMPLEXIN/SNARE COMPLEX                              |
| 1KIL        | B C                 | B        | THREE-DIMENSIONAL STRUCTURE OF THE COMPLEXIN/SNARE COMPLEX                              |
| 1KIL        | B C                 | B        | THREE-DIMENSIONAL STRUCTURE OF THE COMPLEXIN/SNARE COMPLEX                              |
| 1KIL        | B C                 | C        | THREE-DIMENSIONAL STRUCTURE OF THE COMPLEXIN/SNARE COMPLEX                              |
| 1KIL        | C D                 | C        | THREE-DIMENSIONAL STRUCTURE OF THE COMPLEXIN/SNARE COMPLEX                              |
| 1KIL        | C D                 | D        | THREE-DIMENSIONAL STRUCTURE OF THE COMPLEXIN/SNARE COMPLEX                              |
| 1KJY        | C D                 | C        | CRYSTAL STRUCTURE OF HUMAN G[ALPHA]I1 BOUND TO THE GOLOCO MOTIF OF RGS14                |
| 1KJY        | C D                 | D        | CRYSTAL STRUCTURE OF HUMAN G[ALPHA]I1 BOUND TO THE GOLOCO MOTIF OF RGS14                |
| 1KKL        | A I                 | A        | L.CASEI HPRK/P IN COMPLEX WITH B.SUBTILIS HPR                                           |
| 1KKL        | B J                 | B        | L.CASEI HPRK/P IN COMPLEX WITH B.SUBTILIS HPR                                           |
| 1KKL        | C H                 | C        | L.CASEI HPRK/P IN COMPLEX WITH B.SUBTILIS HPR                                           |
| 1KKQ        | D H                 | H        | CRYSTAL STRUCTURE OF THE HUMAN PPAR-ALPHA LIGAND-BINDING DOMAIN IN COMPLEX WITH AN A    |
| 1KMI        | Y Z                 | Z        | CRYSTAL STRUCTURE OF AN E.COLI CHEMOTAXIS PROTEIN, CHEZ                                 |
| 1KPE        | A B                 | A        | PKCI-TRANSITION STATE ANALOG                                                            |
| 1KPE        | A B                 | B        | PKCI-TRANSITION STATE ANALOG                                                            |
| 1KXP        | A D                 | D        | CRYSTAL STRUCTURE OF HUMAN VITAMIN D-BINDING PROTEIN IN COMPLEX WITH SKELETAL ACTIN     |
| 1KXP        | A D                 | D        | CRYSTAL STRUCTURE OF HUMAN VITAMIN D-BINDING PROTEIN IN COMPLEX WITH SKELETAL ACTIN     |
| 1KZ7        | A B                 | A        | CRYSTAL STRUCTURE OF THE DH/PH FRAGMENT OF MURINE DBS IN COMPLEX WITH THE PLACENTAL I   |
| 1KZ7        | A B                 | B        | CRYSTAL STRUCTURE OF THE DH/PH FRAGMENT OF MURINE DBS IN COMPLEX WITH THE PLACENTAL I   |

TABLE S4

Jochim, et al

| A. PDB<br>CODE | E. FUNCTION                             | F. $\Delta\Delta G_{\text{AVG,HELIX}}$<br>(KCAL/MOL) | G. $\Delta\Delta G_{\text{SUM,HELIX}}$<br>(KCAL/MOL) | H. # HOTSPOT<br>RESIDUES | I. HELIX<br>LENGTH |
|----------------|-----------------------------------------|------------------------------------------------------|------------------------------------------------------|--------------------------|--------------------|
| 1JN5           | TRANSPORT PROTEIN                       | 1.5                                                  | 4.6                                                  | 3                        | 25                 |
| 1JOW           | CELL CYCLE/TRANSFERASE                  | 1.9                                                  | 3.8                                                  | 2                        | 21                 |
| 1JPW           | CELL ADHESION                           | 1.6                                                  | 3.1                                                  | 2                        | 18                 |
| 1JPW           | CELL ADHESION                           | 1.4                                                  | 2.7                                                  | 2                        | 6                  |
| 1JPW           | CELL ADHESION                           | 1.3                                                  | 4.0                                                  | 3                        | 18                 |
| 1JPW           | CELL ADHESION                           | 1.7                                                  | 3.3                                                  | 2                        | 16                 |
| 1JPW           | CELL ADHESION                           | 1.9                                                  | 5.7                                                  | 3                        | 18                 |
| 1JSU           | COMPLEX (TRANSFERASE/CYCLIN/INHIBITOR)  | 1.7                                                  | 6.7                                                  | 4                        | 15                 |
| 1JSU           | COMPLEX (TRANSFERASE/CYCLIN/INHIBITOR)  | 1.6                                                  | 4.7                                                  | 3                        | 15                 |
| 1JSU           | COMPLEX (TRANSFERASE/CYCLIN/INHIBITOR)  | 1.8                                                  | 3.6                                                  | 2                        | 17                 |
| 1JSU           | COMPLEX (TRANSFERASE/CYCLIN/INHIBITOR)  | 1.6                                                  | 3.1                                                  | 2                        | 13                 |
| 1JTH           | ENDOCYTOSIS/EXOCYTOSIS                  | 1.3                                                  | 9.4                                                  | 7                        | 61                 |
| 1JTH           | ENDOCYTOSIS/EXOCYTOSIS                  | 1.4                                                  | 8.6                                                  | 6                        | 66                 |
| 1JTH           | ENDOCYTOSIS/EXOCYTOSIS                  | 1.5                                                  | 14.7                                                 | 10                       | 61                 |
| 1JTH           | ENDOCYTOSIS/EXOCYTOSIS                  | 1.9                                                  | 13.0                                                 | 7                        | 44                 |
| 1JTH           | ENDOCYTOSIS/EXOCYTOSIS                  | 1.6                                                  | 12.8                                                 | 8                        | 66                 |
| 1JTH           | ENDOCYTOSIS/EXOCYTOSIS                  | 1.6                                                  | 9.8                                                  | 6                        | 68                 |
| 1JTH           | ENDOCYTOSIS/EXOCYTOSIS                  | 1.3                                                  | 7.7                                                  | 6                        | 68                 |
| 1JTH           | ENDOCYTOSIS/EXOCYTOSIS                  | 1.5                                                  | 10.2                                                 | 7                        | 44                 |
| 1K3Z           | TRANSCRIPTION                           | 1.5                                                  | 4.5                                                  | 3                        | 12                 |
| 1K5D           | SIGNALING PROTEIN/SIGNALING ACTIVATOR   | 1.9                                                  | 3.8                                                  | 2                        | 9                  |
| 1K74           | TRANSCRIPTION                           | 1.2                                                  | 2.4                                                  | 2                        | 17                 |
| 1K74           | TRANSCRIPTION                           | 1.3                                                  | 5.3                                                  | 4                        | 29                 |
| 1K74           | TRANSCRIPTION                           | 1.1                                                  | 2.2                                                  | 2                        | 8                  |
| 1K74           | TRANSCRIPTION                           | 1.5                                                  | 4.5                                                  | 3                        | 10                 |
| 1K7L           | TRANSCRIPTION                           | 1.2                                                  | 3.6                                                  | 3                        | 10                 |
| 1K7L           | TRANSCRIPTION                           | 1.4                                                  | 2.7                                                  | 2                        | 10                 |
| 1K7L           | TRANSCRIPTION                           | 1.6                                                  | 3.2                                                  | 2                        | 10                 |
| 1KBH           | TRANSCRIPTION                           | 1.8                                                  | 3.5                                                  | 2                        | 14                 |
| 1KBH           | TRANSCRIPTION                           | 1.9                                                  | 9.5                                                  | 5                        | 17                 |
| 1KCG           | IMMUNE SYSTEM                           | 1.1                                                  | 2.1                                                  | 2                        | 23                 |
| 1KCG           | IMMUNE SYSTEM                           | 1.9                                                  | 3.7                                                  | 2                        | 23                 |
| 1KDX           | TRANSCRIPTION REGULATION COMPLEX        | 1.8                                                  | 3.5                                                  | 2                        | 16                 |
| 1KDX           | TRANSCRIPTION REGULATION COMPLEX        | 1.7                                                  | 5.0                                                  | 3                        | 21                 |
| 1KDX           | TRANSCRIPTION REGULATION COMPLEX        | 1.3                                                  | 2.6                                                  | 2                        | 11                 |
| 1KDX           | TRANSCRIPTION REGULATION COMPLEX        | 1.4                                                  | 4.1                                                  | 3                        | 11                 |
| 1KF9           | HORMONE/GROWTH FACTOR                   | 1.3                                                  | 3.8                                                  | 3                        | 47                 |
| 1KF9           | HORMONE/GROWTH FACTOR                   | 1.3                                                  | 2.6                                                  | 2                        | 28                 |
| 1KF9           | HORMONE/GROWTH FACTOR                   | 1.4                                                  | 2.7                                                  | 2                        | 28                 |
| 1KIL           | MEMBRANE PROTEIN                        | 1.5                                                  | 10.6                                                 | 7                        | 50                 |
| 1KIL           | MEMBRANE PROTEIN                        | 1.4                                                  | 2.8                                                  | 2                        | 17                 |
| 1KIL           | MEMBRANE PROTEIN                        | 1.8                                                  | 9.2                                                  | 5                        | 39                 |
| 1KIL           | MEMBRANE PROTEIN                        | 1.5                                                  | 13.4                                                 | 9                        | 50                 |
| 1KIL           | MEMBRANE PROTEIN                        | 1.4                                                  | 13.8                                                 | 10                       | 62                 |
| 1KIL           | MEMBRANE PROTEIN                        | 1.5                                                  | 3.0                                                  | 2                        | 50                 |
| 1KIL           | MEMBRANE PROTEIN                        | 1.4                                                  | 2.8                                                  | 2                        | 17                 |
| 1KIL           | MEMBRANE PROTEIN                        | 1.4                                                  | 8.3                                                  | 6                        | 39                 |
| 1KIL           | MEMBRANE PROTEIN                        | 1.7                                                  | 8.6                                                  | 5                        | 70                 |
| 1KIL           | MEMBRANE PROTEIN                        | 1.3                                                  | 6.4                                                  | 5                        | 70                 |
| 1KIL           | MEMBRANE PROTEIN                        | 1.3                                                  | 10.7                                                 | 8                        | 62                 |
| 1KJY           | SIGNALING PROTEIN                       | 1.3                                                  | 2.6                                                  | 2                        | 14                 |
| 1KJY           | SIGNALING PROTEIN                       | 1.3                                                  | 7.7                                                  | 6                        | 12                 |
| 1KKL           | TRANSFERASE,HYDROLASE/TRANSPORT PROTEIN | 1.5                                                  | 4.5                                                  | 3                        | 17                 |
| 1KKL           | TRANSFERASE,HYDROLASE/TRANSPORT PROTEIN | 1.6                                                  | 3.2                                                  | 2                        | 14                 |
| 1KKL           | TRANSFERASE,HYDROLASE/TRANSPORT PROTEIN | 1.4                                                  | 4.1                                                  | 3                        | 17                 |
| 1KKQ           | TRANSCRIPTION                           | 1.5                                                  | 3.0                                                  | 2                        | 6                  |
| 1KMI           | SIGNALING PROTEIN                       | 1.9                                                  | 3.7                                                  | 2                        | 49                 |
| 1KPE           | PROTEIN KINASE INHIBITOR                | 1.6                                                  | 3.1                                                  | 2                        | 17                 |
| 1KPE           | PROTEIN KINASE INHIBITOR                | 1.5                                                  | 4.4                                                  | 3                        | 18                 |
| 1KXP           | CONTRACTILE PROTEIN/PROTEIN BINDING     | 1.7                                                  | 3.4                                                  | 2                        | 11                 |
| 1KXP           | CONTRACTILE PROTEIN/PROTEIN BINDING     | 1.7                                                  | 6.8                                                  | 4                        | 33                 |
| 1KZ7           | SIGNALING PROTEIN                       | 1.2                                                  | 2.3                                                  | 2                        | 13                 |
| 1KZ7           | SIGNALING PROTEIN                       | 1.7                                                  | 3.3                                                  | 2                        | 8                  |

TABLE S4

Jochim, et al

| A. PDB<br>CODE | J. HELIX START<br>RESIDUE # | K. HELIX END<br>RESIDUE # |
|----------------|-----------------------------|---------------------------|
| 1JN5           | 6                           | 30                        |
| 1JOW           | 167                         | 187                       |
| 1JPW           | 249                         | 266                       |
| 1JPW           | 42                          | 47                        |
| 1JPW           | 249                         | 266                       |
| 1JPW           | 291                         | 306                       |
| 1JPW           | 249                         | 266                       |
| 1JSU           | 179                         | 193                       |
| 1JSU           | 288                         | 302                       |
| 1JSU           | 253                         | 269                       |
| 1JSU           | 38                          | 50                        |
| 1JTH           | 12                          | 72                        |
| 1JTH           | 192                         | 257                       |
| 1JTH           | 12                          | 72                        |
| 1JTH           | 196                         | 239                       |
| 1JTH           | 192                         | 257                       |
| 1JTH           | 11                          | 78                        |
| 1JTH           | 11                          | 78                        |
| 1JTH           | 196                         | 239                       |
| 1K3Z           | 294                         | 305                       |
| 1K5D           | 23                          | 31                        |
| 1K74           | 421                         | 437                       |
| 1K74           | 431                         | 459                       |
| 1K74           | 467                         | 474                       |
| 1K74           | 688                         | 697                       |
| 1K7L           | 688                         | 697                       |
| 1K7L           | 688                         | 697                       |
| 1K7L           | 688                         | 697                       |
| 1KBH           | 4                           | 17                        |
| 1KBH           | 84                          | 100                       |
| 1KCG           | 65                          | 87                        |
| 1KCG           | 65                          | 87                        |
| 1KDX           | 597                         | 612                       |
| 1KDX           | 646                         | 666                       |
| 1KDX           | 120                         | 130                       |
| 1KDX           | 135                         | 145                       |
| 1KF9           | 109                         | 182                       |
| 1KF9           | 6                           | 33                        |
| 1KF9           | 1006                        | 1033                      |
| 1KIL           | 39                          | 88                        |
| 1KIL           | 232                         | 248                       |
| 1KIL           | 193                         | 231                       |
| 1KIL           | 39                          | 88                        |
| 1KIL           | 141                         | 202                       |
| 1KIL           | 39                          | 88                        |
| 1KIL           | 232                         | 248                       |
| 1KIL           | 193                         | 231                       |
| 1KIL           | 11                          | 80                        |
| 1KIL           | 11                          | 80                        |
| 1KIL           | 141                         | 202                       |
| 1KJY           | 1242                        | 1255                      |
| 1KJY           | 1497                        | 1508                      |
| 1KKL           | 293                         | 309                       |
| 1KKL           | 293                         | 306                       |
| 1KKL           | 293                         | 309                       |
| 1KKQ           | 686                         | 691                       |
| 1KMI           | 104                         | 152                       |
| 1KPE           | 71                          | 87                        |
| 1KPE           | 71                          | 88                        |
| 1KXP           | 305                         | 315                       |
| 1KXP           | 195                         | 227                       |
| 1KZ7           | 761                         | 773                       |
| 1KZ7           | 66                          | 73                        |

TABLE S4

| A. PDB<br>CODE | L. HELIX SEQUENCE                                                      |
|----------------|------------------------------------------------------------------------|
| 1JN5           | FKTYVDQACRAAEFVNVYYTTMDK                                               |
| 1JOW           | EDLWPQLYEAASTTICKALIQ                                                  |
| 1JPW           | DSVLFYAITTLHNLLLHQ                                                     |
| 1JPW           | ADVKSS                                                                 |
| 1JPW           | DSVLFYAITTLHNLLLHQ                                                     |
| 1JPW           | VKFLAITTDCLQILAY                                                       |
| 1JPW           | DSVLFYAITTLHNLLLHQ                                                     |
| 1JSU           | HEDIHTYLREMEVKC                                                        |
| 1JSU           | KKQVLRMEHLVLKVL                                                        |
| 1JSU           | LQLVGTAAAMLLASKFEE                                                     |
| 1JSU           | HEELTRDLEKHCR                                                          |
| 1JTH           | EEMQRRADQLADESLESTRRMLQLVEESKDAGIRTLVMLDEQGEQLERIEEGMDQINKDMK          |
| 1JTH           | LSEIETRHSEIIKLENSIRELHDMFMDMAMLVESQGEMIDRIEYNVEHAVDYVERAVSDTKKAVKY     |
| 1JTH           | EEMQRRADQLADESLESTRRMLQLVEESKDAGIRTLVMLDEQGEQLERIEEGMDQINKDMK          |
| 1JTH           | ETRHSEIIKLENSIRELHDMFMDMAMLVESQGEMIDRIEYNVEH                           |
| 1JTH           | LSEIETRHSEIIKLENSIRELHDMFMDMAMLVESQGEMIDRIEYNVEHAVDYVERAVSDTKKAVKY     |
| 1JTH           | LEEMQRRADQLADESLESTRRMLQLVEESKDAGIRTLVMLDEQGEQLERIEEGMDQINKDMKEAEKNL   |
| 1JTH           | LEEMQRRADQLADESLESTRRMLQLVEESKDAGIRTLVMLDEQGEQLERIEEGMDQINKDMKEAEKNL   |
| 1JTH           | ETRHSEIIKLENSIRELHDMFMDMAMLVESQGEMIDRIEYNVEH                           |
| 1K3Z           | DRHRIEKRKRT                                                            |
| 1K5D           | KTTFVKRHL                                                              |
| 1K74           | RLPALRSIGLKCLEHLF                                                      |
| 1K74           | LFKLLQKMTDLRQIVTEHVQLLQVIKKT                                           |
| 1K74           | PLLQEYK                                                                |
| 1K74           | KILHRLQEG                                                              |
| 1K7L           | KILHRLQEG                                                              |
| 1K7L           | KILHRLQEG                                                              |
| 1K7L           | KILHRLQEG                                                              |
| 1K7L           | KILHRLQEG                                                              |
| 1KBH           | SDERALLDQLHTLL                                                         |
| 1KBH           | PQLMAAFIKQRTAKYVA                                                      |
| 1KCG           | DAWGKQLEMLREVGQRLRLELAD                                                |
| 1KCG           | DAWGKQLEMLREVGQRLRLELAD                                                |
| 1KDX           | QDLRSHLVHKLVAIF                                                        |
| 1KDX           | RDEYYHLLAEKIYKIQKELEE                                                  |
| 1KDX           | DSQKRREILSR                                                            |
| 1KDX           | RKILNDLSSDA                                                            |
| 1KF9           | NVYDLLKDL EEGIQTLMGRLLLKNYGLLYCFNKDMSKVSTYLRTVQC                       |
| 1KF9           | LSRLADNAWLRADRLNQLAFDITYQEFEE                                          |
| 1KF9           | LSRLADNAWLRADRLNQLAFDITYQEFEE                                          |
| 1KIL           | VDEVVDIMRVNVDKVLERDQKLELDDRADALQAGASQFETSAAKLKRY                       |
| 1KIL           | RIEYNVEHAVDYVERAV                                                      |
| 1KIL           | SEIETRHSEIIKLENSIRELHDMFMDMAMLVESQGEMID                                |
| 1KIL           | VDEVVDIMRVNVDKVLERDQKLELDDRADALQAGASQFETSAAKLKRY                       |
| 1KIL           | ARENEMDENLEQVSGIIGNLRHMALDMGNEIDTQNRQIDRIMEKADSNKTRIDEANQRATKM         |
| 1KIL           | VDEVVDIMRVNVDKVLERDQKLELDDRADALQAGASQFETSAAKLKRY                       |
| 1KIL           | RIEYNVEHAVDYVERAV                                                      |
| 1KIL           | SEIETRHSEIIKLENSIRELHDMFMDMAMLVESQGEMID                                |
| 1KIL           | LEEMQRRADQLADESLESTRRMLQLVEESKDAGIRTLVMLDEQGEQLDRVEEGMNHINQDMKEAEKNLKD |
| 1KIL           | LEEMQRRADQLADESLESTRRMLQLVEESKDAGIRTLVMLDEQGEQLDRVEEGMNHINQDMKEAEKNLKD |
| 1KIL           | ARENEMDENLEQVSGIIGNLRHMALDMGNEIDTQNRQIDRIMEKADSNKTRIDEANQRATKM         |
| 1KJY           | RMHESMKLFDISICN                                                        |
| 1KJY           | IEGLVELLNRVQ                                                           |
| 1KKL           | ATKTFEKNLNHLIEHNE                                                      |
| 1KKL           | ATKTFEKNLNHLIE                                                         |
| 1KKL           | ATKTFEKNLNHLIEHNE                                                      |
| 1KKQ           | EAIIRK                                                                 |
| 1KMI           | LADARELVTDRQFLADVPAHTSFTNAQLLKIMMAQDFQDLTGQVIKRM                       |
| 1KPE           | ESLLGHLMIVGKKCAAD                                                      |
| 1KPE           | ESLLGHLMIVGKKCAADL                                                     |
| 1KXP           | AMDFVCTYFM                                                             |
| 1KXP           | PTVCFKERLQLKHLSSLTTLNVRVCSQYAAAYG                                      |
| 1KZ7           | LDSYLLKPVQRIT                                                          |
| 1KZ7           | RLRPLSYP                                                               |

| A. PDB<br>CODE | M. RESOLUTION |
|----------------|---------------|
| 1JN5           | 2.8           |
| 1JOW           | 3.1           |
| 1JPW           | 2.5           |
| 1JPW           | 2.5           |
| 1JPW           | 2.5           |
| 1JPW           | 2.5           |
| 1JPW           | 2.5           |
| 1JSU           | 2.3           |
| 1JSU           | 2.3           |
| 1JSU           | 2.3           |
| 1JSU           | 2.3           |
| 1JTH           | 2             |
| 1JTH           | 2             |
| 1JTH           | 2             |
| 1JTH           | 2             |
| 1JTH           | 2             |
| 1JTH           | 2             |
| 1JTH           | 2             |
| 1JTH           | 2             |
| 1JTH           | 2             |
| 1K3Z           | 2.5           |
| 1K5D           | 2.7           |
| 1K74           | 2.3           |
| 1K74           | 2.3           |
| 1K74           | 2.3           |
| 1K74           | 2.3           |
| 1K7L           | 2.5           |
| 1K7L           | 2.5           |
| 1K7L           | 2.5           |
| 1KBH           | NOT APP       |
| 1KBH           | NOT APP       |
| 1KCG           | 2.6           |
| 1KCG           | 2.6           |
| 1KDX           | NOT APP       |
| 1KDX           | NOT APP       |
| 1KDX           | NOT APP       |
| 1KDX           | NOT APP       |
| 1KF9           | 2.6           |
| 1KF9           | 2.6           |
| 1KF9           | 2.6           |
| 1KIL           | 2.3           |
| 1KIL           | 2.3           |
| 1KIL           | 2.3           |
| 1KIL           | 2.3           |
| 1KIL           | 2.3           |
| 1KIL           | 2.3           |
| 1KIL           | 2.3           |
| 1KIL           | 2.3           |
| 1KIL           | 2.3           |
| 1KIL           | 2.3           |
| 1KIL           | 2.3           |
| 1KIL           | 2.3           |
| 1KIL           | 2.3           |
| 1KJY           | 2.7           |
| 1KJY           | 2.7           |
| 1KKL           | 2.8           |
| 1KKL           | 2.8           |
| 1KKL           | 2.8           |
| 1KKQ           | 3             |
| 1KMI           | 2.9           |
| 1KPE           | 1.8           |
| 1KPE           | 1.8           |
| 1KXP           | 2.1           |
| 1KXP           | 2.1           |
| 1KZ7           | 2.4           |
| 1KZ7           | 2.4           |

| A. PDB CODE | B. INTERFACE CHAINS | C. CHAIN | D. TITLE                                                                                |
|-------------|---------------------|----------|-----------------------------------------------------------------------------------------|
| 1KZ7        | C D                 | C        | CRYSTAL STRUCTURE OF THE DH/PH FRAGMENT OF MURINE DBS IN COMPLEX WITH THE PLACENTAL I   |
| 1KZ7        | C D                 | D        | CRYSTAL STRUCTURE OF THE DH/PH FRAGMENT OF MURINE DBS IN COMPLEX WITH THE PLACENTAL I   |
| 1L2I        | A C                 | A        | HUMAN ESTROGEN RECEPTOR ALPHA LIGAND-BINDING DOMAIN IN COMPLEX WITH (R,R)-5,11-CIS-DIE7 |
| 1L2I        | A C                 | C        | HUMAN ESTROGEN RECEPTOR ALPHA LIGAND-BINDING DOMAIN IN COMPLEX WITH (R,R)-5,11-CIS-DIE7 |
| 1L2W        | B I                 | B        | CRYSTAL STRUCTURE OF THE YERSINIA VIRULENCE EFFECTOR YOPE CHAPERONE-BINDING DOMAIN I    |
| 1L2W        | B I                 | I        | CRYSTAL STRUCTURE OF THE YERSINIA VIRULENCE EFFECTOR YOPE CHAPERONE-BINDING DOMAIN I    |
| 1L2W        | C J                 | J        | CRYSTAL STRUCTURE OF THE YERSINIA VIRULENCE EFFECTOR YOPE CHAPERONE-BINDING DOMAIN I    |
| 1L2W        | D J                 | J        | CRYSTAL STRUCTURE OF THE YERSINIA VIRULENCE EFFECTOR YOPE CHAPERONE-BINDING DOMAIN I    |
| 1L2W        | E K                 | K        | CRYSTAL STRUCTURE OF THE YERSINIA VIRULENCE EFFECTOR YOPE CHAPERONE-BINDING DOMAIN I    |
| 1L2W        | H L                 | L        | CRYSTAL STRUCTURE OF THE YERSINIA VIRULENCE EFFECTOR YOPE CHAPERONE-BINDING DOMAIN I    |
| 1L8C        | A B                 | A        | STRUCTURAL BASIS FOR HIF-1ALPHA/CBP RECOGNITION IN THE CELLULAR HYPOXIC RESPONSE        |
| 1L8C        | A B                 | A        | STRUCTURAL BASIS FOR HIF-1ALPHA/CBP RECOGNITION IN THE CELLULAR HYPOXIC RESPONSE        |
| 1LB1        | A B                 | B        | CRYSTAL STRUCTURE OF THE DBL AND PLECKSTRIN HOMOLOGY DOMAINS OF DBS IN COMPLEX WITH     |
| 1LB1        | A B                 | B        | CRYSTAL STRUCTURE OF THE DBL AND PLECKSTRIN HOMOLOGY DOMAINS OF DBS IN COMPLEX WITH     |
| 1LDK        | A B                 | B        | STRUCTURE OF THE CUL1-RBX1-SKP1-F BOXSKP2 SCF UBIQUITIN LIGASE COMPLEX                  |
| 1LJ2        | A D                 | A        | RECOGNITION OF EIF4G BY ROTAVIRUS NSP3 REVEALS A BASIS FOR MRNA CIRCULARIZATION         |
| 1LJ2        | A D                 | D        | RECOGNITION OF EIF4G BY ROTAVIRUS NSP3 REVEALS A BASIS FOR MRNA CIRCULARIZATION         |
| 1LOT        | A B                 | A        | CRYSTAL STRUCTURE OF THE COMPLEX OF ACTIN WITH VITAMIN D- BINDING PROTEIN               |
| 1LOT        | A B                 | A        | CRYSTAL STRUCTURE OF THE COMPLEX OF ACTIN WITH VITAMIN D- BINDING PROTEIN               |
| 1LP1        | A B                 | A        | PROTEIN Z IN COMPLEX WITH AN IN VITRO SELECTED AFFIBODY                                 |
| 1LQM        | E F                 | E        | ESCHERICHIA COLI URACIL-DNA GLYCOSYLASE COMPLEX WITH URACIL- DNA GLYCOSYLASE INHIBIT    |
| 1LQS        | R M                 | M        | CRYSTAL STRUCTURE OF HUMAN CYTOMEGALOVIRUS IL-10 BOUND TO SOLUBLE HUMAN IL-10R1         |
| 1LTX        | A B                 | B        | STRUCTURE OF RAB ESCORT PROTEIN-1 IN COMPLEX WITH RAB GERANYLGERANYL TRANSFERASE AN     |
| 1LTX        | A R                 | R        | STRUCTURE OF RAB ESCORT PROTEIN-1 IN COMPLEX WITH RAB GERANYLGERANYL TRANSFERASE AN     |
| 1LZW        | A B                 | A        | STRUCTURAL BASIS OF CLPS-MEDIATED SWITCH IN CLPA SUBSTRATE RECOGNITION                  |
| 1M1E        | A B                 | B        | BETA-CATENIN ARMADILLO REPEAT DOMAIN BOUND TO ICAT                                      |
| 1M2O        | A B                 | B        | CRYSTAL STRUCTURE OF THE SEC23-SAR1 COMPLEX                                             |
| 1M2O        | C D                 | D        | CRYSTAL STRUCTURE OF THE SEC23-SAR1 COMPLEX                                             |
| 1M2Z        | A B                 | A        | CRYSTAL STRUCTURE OF A DIMER COMPLEX OF THE HUMAN GLUCOCORTICOID RECEPTOR LIGAND-BI     |
| 1M2Z        | A B                 | B        | CRYSTAL STRUCTURE OF A DIMER COMPLEX OF THE HUMAN GLUCOCORTICOID RECEPTOR LIGAND-BI     |
| 1M45        | A B                 | A        | CRYSTAL STRUCTURE OF MLC1P BOUND TO IQ2 OF MYO2P, A CLASS V MYOSIN                      |
| 1M45        | A B                 | B        | CRYSTAL STRUCTURE OF MLC1P BOUND TO IQ2 OF MYO2P, A CLASS V MYOSIN                      |
| 1M63        | A B                 | B        | CRYSTAL STRUCTURE OF CALCINEURIN-CYCLOPHILIN-CYCLOSPORIN SHOWS COMMON BUT DISTINCT      |
| 1M63        | A B                 | B        | CRYSTAL STRUCTURE OF CALCINEURIN-CYCLOPHILIN-CYCLOSPORIN SHOWS COMMON BUT DISTINCT      |
| 1M63        | E F                 | F        | CRYSTAL STRUCTURE OF CALCINEURIN-CYCLOPHILIN-CYCLOSPORIN SHOWS COMMON BUT DISTINCT      |
| 1M63        | E F                 | F        | CRYSTAL STRUCTURE OF CALCINEURIN-CYCLOPHILIN-CYCLOSPORIN SHOWS COMMON BUT DISTINCT      |
| 1MDU        | D E                 | D        | CRYSTAL STRUCTURE OF THE CHICKEN ACTIN TRIMER COMPLEXED WITH HUMAN GELSOLIN SEGMENT     |
| 1MJE        | B A                 | B        | STRUCTURE OF A BRCA2-DSS1-SSDNA COMPLEX                                                 |
| 1MKW        | L H                 | L        | THE CO-CRYSTAL STRUCTURE OF UNLIGANDED BOVINE ALPHA- THROMBIN AND PRETHROMBIN-2: MO     |
| 1MWA        | A B                 | B        | 2C/H-2KBM3/DEV8 ALLOGENEIC COMPLEX                                                      |
| 1MXE        | A E                 | A        | STRUCTURE OF THE COMPLEX OF CALMODULIN WITH THE TARGET SEQUENCE OF CAMKI                |
| 1MXE        | A E                 | A        | STRUCTURE OF THE COMPLEX OF CALMODULIN WITH THE TARGET SEQUENCE OF CAMKI                |
| 1MXE        | A E                 | A        | STRUCTURE OF THE COMPLEX OF CALMODULIN WITH THE TARGET SEQUENCE OF CAMKI                |
| 1MXE        | A E                 | A        | STRUCTURE OF THE COMPLEX OF CALMODULIN WITH THE TARGET SEQUENCE OF CAMKI                |
| 1MXE        | B F                 | B        | STRUCTURE OF THE COMPLEX OF CALMODULIN WITH THE TARGET SEQUENCE OF CAMKI                |
| 1MXE        | B F                 | B        | STRUCTURE OF THE COMPLEX OF CALMODULIN WITH THE TARGET SEQUENCE OF CAMKI                |
| 1MXE        | B F                 | B        | STRUCTURE OF THE COMPLEX OF CALMODULIN WITH THE TARGET SEQUENCE OF CAMKI                |
| 1MZN        | A B                 | A        | CRYSTAL STRUCTURE AT 1.9 ANGSTROEMS RESOLUTION OF THE HOMODIMER OF HUMAN RXR ALPHA I    |
| 1MZN        | A B                 | A        | CRYSTAL STRUCTURE AT 1.9 ANGSTROEMS RESOLUTION OF THE HOMODIMER OF HUMAN RXR ALPHA I    |
| 1MZN        | A B                 | B        | CRYSTAL STRUCTURE AT 1.9 ANGSTROEMS RESOLUTION OF THE HOMODIMER OF HUMAN RXR ALPHA I    |
| 1MZN        | E F                 | F        | CRYSTAL STRUCTURE AT 1.9 ANGSTROEMS RESOLUTION OF THE HOMODIMER OF HUMAN RXR ALPHA I    |
| 1N0W        | A B                 | A        | CRYSTAL STRUCTURE OF A RAD51-BRCA2 BRC REPEAT COMPLEX                                   |
| 1N2D        | B C                 | B        | TERNARY COMPLEX OF MLC1P BOUND TO IQ2 AND IQ3 OF MYO2P, A CLASS V MYOSIN                |
| 1N4M        | B E                 | B        | STRUCTURE OF RB TUMOR SUPPRESSOR BOUND TO THE TRANSACTIVATION DOMAIN OF E2F-2           |
| 1N4Q        | A B                 | A        | PROTEIN GERANYLGERANYLTRANSFERASE TYPE-I COMPLEXED WITH A GGPP ANALOG AND A KKKSKI      |
| 1N4Q        | A B                 | A        | PROTEIN GERANYLGERANYLTRANSFERASE TYPE-I COMPLEXED WITH A GGPP ANALOG AND A KKKSKI      |
| 1N4Q        | A B                 | A        | PROTEIN GERANYLGERANYLTRANSFERASE TYPE-I COMPLEXED WITH A GGPP ANALOG AND A KKKSKI      |
| 1N4Q        | C D                 | C        | PROTEIN GERANYLGERANYLTRANSFERASE TYPE-I COMPLEXED WITH A GGPP ANALOG AND A KKKSKI      |
| 1N4Q        | C D                 | D        | PROTEIN GERANYLGERANYLTRANSFERASE TYPE-I COMPLEXED WITH A GGPP ANALOG AND A KKKSKI      |
| 1N4Q        | E F                 | E        | PROTEIN GERANYLGERANYLTRANSFERASE TYPE-I COMPLEXED WITH A GGPP ANALOG AND A KKKSKI      |
| 1N4Q        | E F                 | E        | PROTEIN GERANYLGERANYLTRANSFERASE TYPE-I COMPLEXED WITH A GGPP ANALOG AND A KKKSKI      |
| 1N4Q        | G H                 | G        | PROTEIN GERANYLGERANYLTRANSFERASE TYPE-I COMPLEXED WITH A GGPP ANALOG AND A KKKSKI      |
| 1N4Q        | G H                 | H        | PROTEIN GERANYLGERANYLTRANSFERASE TYPE-I COMPLEXED WITH A GGPP ANALOG AND A KKKSKI      |

TABLE S4

Jochim, et al

| A. PDB<br>CODE | E. FUNCTION                           | F. $\Delta\Delta G_{\text{AVG,HELIX}}$<br>(KCAL/MOL) | G. $\Delta\Delta G_{\text{SUM,HELIX}}$<br>(KCAL/MOL) | H. # HOTSPOT<br>RESIDUES | I. HELIX<br>LENGTH |
|----------------|---------------------------------------|------------------------------------------------------|------------------------------------------------------|--------------------------|--------------------|
| 1KZ7           | SIGNALING PROTEIN                     | 1.0                                                  | 2.0                                                  | 2                        | 13                 |
| 1KZ7           | SIGNALING PROTEIN                     | 1.7                                                  | 5.1                                                  | 3                        | 7                  |
| 1L2I           | TRANSCRIPTION RECEPTOR/COACTIVATOR    | 1.1                                                  | 2.2                                                  | 2                        | 10                 |
| 1L2I           | TRANSCRIPTION RECEPTOR/COACTIVATOR    | 1.7                                                  | 3.4                                                  | 2                        | 9                  |
| 1L2W           | CHAPERONE                             | 1.8                                                  | 3.5                                                  | 2                        | 16                 |
| 1L2W           | CHAPERONE                             | 1.7                                                  | 3.3                                                  | 2                        | 10                 |
| 1L2W           | CHAPERONE                             | 1.6                                                  | 3.2                                                  | 2                        | 10                 |
| 1L2W           | CHAPERONE                             | 1.9                                                  | 3.8                                                  | 2                        | 8                  |
| 1L2W           | CHAPERONE                             | 1.3                                                  | 2.5                                                  | 2                        | 10                 |
| 1L2W           | CHAPERONE                             | 1.5                                                  | 2.9                                                  | 2                        | 10                 |
| 1L8C           | GENE REGULATION                       | 1.6                                                  | 4.7                                                  | 3                        | 16                 |
| 1L8C           | GENE REGULATION                       | 1.5                                                  | 7.7                                                  | 5                        | 27                 |
| 1LB1           | SIGNALING PROTEIN                     | 1.3                                                  | 2.5                                                  | 2                        | 7                  |
| 1LB1           | SIGNALING PROTEIN                     | 1.7                                                  | 3.3                                                  | 2                        | 19                 |
| 1LDK           | LIGASE                                | 1.2                                                  | 2.3                                                  | 2                        | 15                 |
| 1LJ2           | VIRAL PROTEIN/ TRANSLATION            | 1.0                                                  | 2.0                                                  | 2                        | 33                 |
| 1LJ2           | VIRAL PROTEIN/ TRANSLATION            | 1.3                                                  | 2.6                                                  | 2                        | 6                  |
| 1LOT           | TRANSPORT PROTEIN, STRUCTURAL PROTEIN | 1.4                                                  | 2.7                                                  | 2                        | 11                 |
| 1LOT           | TRANSPORT PROTEIN, STRUCTURAL PROTEIN | 1.7                                                  | 5.1                                                  | 3                        | 33                 |
| 1LP1           | IMMUNE SYSTEM                         | 1.7                                                  | 6.7                                                  | 4                        | 14                 |
| 1LQM           | HYDROLASE/HYDROLASE INHIBITOR         | 1.0                                                  | 2.0                                                  | 2                        | 12                 |
| 1LQS           | IMMUNE SYSTEM                         | 1.5                                                  | 3.0                                                  | 2                        | 15                 |
| 1LTX           | TRANSFERASE/PROTEIN BINDING           | 1.8                                                  | 5.4                                                  | 3                        | 12                 |
| 1LTX           | TRANSFERASE/PROTEIN BINDING           | 1.7                                                  | 3.4                                                  | 2                        | 16                 |
| 1LZW           | CHAPERONE                             | 1.7                                                  | 6.6                                                  | 4                        | 18                 |
| 1M1E           | STRUCTURAL PROTEIN                    | 1.3                                                  | 2.6                                                  | 2                        | 19                 |
| 1M2O           | PROTEIN TRANSPORT/SIGNALING PROTEIN   | 1.2                                                  | 2.3                                                  | 2                        | 6                  |
| 1M2O           | PROTEIN TRANSPORT/SIGNALING PROTEIN   | 1.2                                                  | 2.4                                                  | 2                        | 10                 |
| 1M2Z           | HORMONE/HORMONE ACTIVATOR             | 1.5                                                  | 2.9                                                  | 2                        | 10                 |
| 1M2Z           | HORMONE/HORMONE ACTIVATOR             | 1.5                                                  | 4.4                                                  | 3                        | 7                  |
| 1M45           | CELL CYCLE PROTEIN                    | 1.4                                                  | 2.7                                                  | 2                        | 8                  |
| 1M45           | CELL CYCLE PROTEIN                    | 1.9                                                  | 14.9                                                 | 8                        | 24                 |
| 1M63           | HYDROLASE/ISOMERASE                   | 1.4                                                  | 8.5                                                  | 6                        | 16                 |
| 1M63           | HYDROLASE/ISOMERASE                   | 1.4                                                  | 4.3                                                  | 3                        | 13                 |
| 1M63           | HYDROLASE/ISOMERASE                   | 1.6                                                  | 4.8                                                  | 3                        | 14                 |
| 1M63           | HYDROLASE/ISOMERASE                   | 1.6                                                  | 3.1                                                  | 2                        | 11                 |
| 1MDU           | STRUCTURAL PROTEIN                    | 1.5                                                  | 4.4                                                  | 3                        | 18                 |
| 1MJE           | GENE REGULATION/ANTITUMOR PROTEIN/DNA | 1.9                                                  | 3.8                                                  | 2                        | 5                  |
| 1MKW           | COMPLEX (BLOOD COAGULATION/PROENZYME) | 1.9                                                  | 5.6                                                  | 3                        | 9                  |
| 1MWA           | IMMUNE SYSTEM                         | 1.4                                                  | 2.8                                                  | 2                        | 7                  |
| 1MXE           | METAL BINDING PROTEIN                 | 1.6                                                  | 4.7                                                  | 3                        | 12                 |
| 1MXE           | METAL BINDING PROTEIN                 | 1.7                                                  | 3.3                                                  | 2                        | 15                 |
| 1MXE           | METAL BINDING PROTEIN                 | 1.3                                                  | 2.5                                                  | 2                        | 13                 |
| 1MXE           | METAL BINDING PROTEIN                 | 1.6                                                  | 3.2                                                  | 2                        | 10                 |
| 1MXE           | METAL BINDING PROTEIN                 | 1.9                                                  | 3.8                                                  | 2                        | 12                 |
| 1MXE           | METAL BINDING PROTEIN                 | 1.6                                                  | 3.2                                                  | 2                        | 12                 |
| 1MXE           | METAL BINDING PROTEIN                 | 1.5                                                  | 6.1                                                  | 4                        | 15                 |
| 1MZN           | TRANSCRIPTION                         | 1.7                                                  | 3.4                                                  | 2                        | 11                 |
| 1MZN           | TRANSCRIPTION                         | 1.5                                                  | 2.9                                                  | 2                        | 22                 |
| 1MZN           | TRANSCRIPTION                         | 1.9                                                  | 11.5                                                 | 6                        | 9                  |
| 1MZN           | TRANSCRIPTION                         | 1.9                                                  | 7.7                                                  | 4                        | 9                  |
| 1N0W           | GENE REGULATION/ANTITUMOR PROTEIN     | 1.4                                                  | 2.7                                                  | 2                        | 13                 |
| 1N2D           | CELL CYCLE                            | 1.8                                                  | 5.3                                                  | 3                        | 11                 |
| 1N4M           | CELL CYCLE                            | 1.6                                                  | 3.1                                                  | 2                        | 13                 |
| 1N4Q           | TRANSFERASE                           | 1.6                                                  | 3.2                                                  | 2                        | 16                 |
| 1N4Q           | TRANSFERASE                           | 1.3                                                  | 2.5                                                  | 2                        | 10                 |
| 1N4Q           | TRANSFERASE                           | 1.6                                                  | 3.2                                                  | 2                        | 14                 |
| 1N4Q           | TRANSFERASE                           | 1.7                                                  | 5.0                                                  | 3                        | 10                 |
| 1N4Q           | TRANSFERASE                           | 1.9                                                  | 7.7                                                  | 4                        | 15                 |
| 1N4Q           | TRANSFERASE                           | 1.2                                                  | 2.4                                                  | 2                        | 13                 |
| 1N4Q           | TRANSFERASE                           | 1.2                                                  | 2.4                                                  | 2                        | 17                 |
| 1N4Q           | TRANSFERASE                           | 1.9                                                  | 5.7                                                  | 3                        | 10                 |
| 1N4Q           | TRANSFERASE                           | 1.9                                                  | 7.5                                                  | 4                        | 13                 |



TABLE S4

Jochim, et al

| A. PDB<br>CODE | J. HELIX START<br>RESIDUE # | K. HELIX END<br>RESIDUE # |
|----------------|-----------------------------|---------------------------|
| 1KZ7           | 1761                        | 1773                      |
| 1KZ7           | 1065                        | 1071                      |
| 1L2I           | 538                         | 547                       |
| 1L2I           | 688                         | 696                       |
| 1L2W           | 102                         | 117                       |
| 1L2W           | 68                          | 77                        |
| 1L2W           | 68                          | 77                        |
| 1L2W           | 38                          | 45                        |
| 1L2W           | 68                          | 77                        |
| 1L2W           | 68                          | 77                        |
| 1L8C           | 62                          | 77                        |
| 1L8C           | 3                           | 29                        |
| 1LB1           | 69                          | 75                        |
| 1LB1           | 89                          | 107                       |
| 1LDK           | 417                         | 431                       |
| 1LJ2           | 274                         | 306                       |
| 1LJ2           | 153                         | 158                       |
| 1LOT           | 125                         | 135                       |
| 1LOT           | 179                         | 211                       |
| 1LP1           | 24                          | 37                        |
| 1LQM           | 87                          | 98                        |
| 1LQS           | 143                         | 157                       |
| 1LTX           | 212                         | 223                       |
| 1LTX           | 286                         | 301                       |
| 1LZW           | 63                          | 80                        |
| 1M1E           | 11                          | 29                        |
| 1M2O           | 82                          | 87                        |
| 1M2O           | 36                          | 45                        |
| 1M2Z           | 589                         | 598                       |
| 1M2Z           | 743                         | 749                       |
| 1M45           | 27                          | 34                        |
| 1M45           | 807                         | 830                       |
| 1M63           | 125                         | 140                       |
| 1M63           | 108                         | 120                       |
| 1M63           | 125                         | 138                       |
| 1M63           | 110                         | 120                       |
| 1MDU           | 71                          | 88                        |
| 1MJE           | 50                          | 54                        |
| 1MKW           | 14                          | 14                        |
| 1MWA           | 134                         | 140                       |
| 1MXE           | 118                         | 129                       |
| 1MXE           | 6                           | 20                        |
| 1MXE           | 81                          | 93                        |
| 1MXE           | 138                         | 147                       |
| 1MXE           | 118                         | 129                       |
| 1MXE           | 45                          | 56                        |
| 1MXE           | 6                           | 20                        |
| 1MZN           | 294                         | 304                       |
| 1MZN           | 264                         | 285                       |
| 1MZN           | 473                         | 481                       |
| 1MZN           | 2473                        | 2481                      |
| 1N0W           | 197                         | 209                       |
| 1N2D           | 83                          | 93                        |
| 1N4M           | 752                         | 764                       |
| 1N4Q           | 94                          | 109                       |
| 1N4Q           | 274                         | 283                       |
| 1N4Q           | 131                         | 144                       |
| 1N4Q           | 274                         | 283                       |
| 1N4Q           | 242                         | 256                       |
| 1N4Q           | 234                         | 246                       |
| 1N4Q           | 309                         | 325                       |
| 1N4Q           | 274                         | 283                       |
| 1N4Q           | 242                         | 254                       |

| A. PDB<br>CODE | L. HELIX SEQUENCE                 |
|----------------|-----------------------------------|
| 1KZ7           | LDSYLLKPVQRIT                     |
| 1KZ7           | DRLRPLS                           |
| 1L2I           | DLLLEMLDAH                        |
| 1L2I           | KILHRLQD                          |
| 1L2W           | SLYTQLEMLVQGAERL                  |
| 1L2W           | HSVIGFIQRM                        |
| 1L2W           | HSVIGFIQRM                        |
| 1L2W           | QYANNLAG                          |
| 1L2W           | HSVIGFIQRM                        |
| 1L2W           | HSVIGFIQRM                        |
| 1L8C           | AHCASSRQIISHWKNC                  |
| 1L8C           | PEKRKLIQQQLVLLLHAHKCQRREQAN       |
| 1LB1           | LRPLSYP                           |
| 1LB1           | PDSLENIPEKWTPEVKHFC               |
| 1LDK           | KSPELLARYCDSLLK                   |
| 1LJ2           | PLHAFDDLESVIRNLSIDYDKLFLMFKGLIQRS |
| 1LJ2           | TEEIMS                            |
| 1LOT           | NDEICEAFRKD                       |
| 1LOT           | PTVCFKERLQKHLSSLTTLNVRVCSQYAAAYG  |
| 1LP1           | DPQKKAFFISLWDD                    |
| 1LQM           | PSLLNMYKELEN                      |
| 1LQS           | LDTLFSRLEEYLHSR                   |
| 1LTX           | SDLLGWWLCERQ                      |
| 1LTX           | MVEKRMLMKFLFCVE                   |
| 1LZW           | AEVAETKVAMVKNYAREN                |
| 1M1E           | PEEMYIQKVRVLLMLRKM                |
| 1M2O           | RLWKDY                            |
| 1M2O           | KTTLLHMLKN                        |
| 1M2Z           | LDDQMTLLQY                        |
| 1M2Z           | ALLRYLL                           |
| 1M45           | LGDYLRAI                          |
| 1M45           | ISQAIKYLQNNIKGFIRQVNDDE           |
| 1M63           | DTQLQQIVDKTIINAD                  |
| 1M63           | NGELFQVLKMMVG                     |
| 1M63           | DTQLQQIVDKTIIN                    |
| 1M63           | ELFQVLKMMVG                       |
| 1MDU           | QDESGAAAIFTVQLDDYL                |
| 1MJE           | DDFSN                             |
| 1MKW           | EKELFESYI                         |
| 1MWA           | KAEIANK                           |
| 1MXE           | DEEVDEMIREAD                      |
| 1MXE           | EEQIAEFKEAFSLFD                   |
| 1MXE           | SEEEIREAFRVFD                     |
| 1MXE           | YEEFVTMMTS                        |
| 1MXE           | DEEVDEMIREAD                      |
| 1MXE           | EAELQDMINEVD                      |
| 1MXE           | EEQIAEFKEAFSLFD                   |
| 1MZN           | LDDQVILLRAG                       |
| 1MZN           | PVTNICQAADKQLFTLVEWAKR            |
| 1MZN           | KILHRLQD                          |
| 1MZN           | KILHRLQD                          |
| 1N0W           | TDHQTQLLYQASA                     |
| 1N2D           | TEDFVKAFQVF                       |
| 1N4M           | IIVFYNSVFMQRL                     |
| 1N4Q           | EKFRDVYDYFRAVLQR                  |
| 1N4Q           | ESAWNYLKGI                        |
| 1N4Q           | YTVWHFRRVLLRSL                    |
| 1N4Q           | ESAWNYLKGI                        |
| 1N4Q           | EKELNRIKRCIMRQ                    |
| 1N4Q           | NSVWNQRHFVISN                     |
| 1N4Q           | PYLIAFLVDIYEDMLEN                 |
| 1N4Q           | ESAWNYLKGI                        |
| 1N4Q           | EKELNRIKRCIM                      |

| A. PDB<br>CODE | M. RESOLUTION |
|----------------|---------------|
| 1KZ7           | 2.4           |
| 1KZ7           | 2.4           |
| 1L2I           | 1.95          |
| 1L2I           | 1.95          |
| 1L2W           | 2             |
| 1L2W           | 2             |
| 1L2W           | 2             |
| 1L2W           | 2             |
| 1L2W           | 2             |
| 1L2W           | 2             |
| 1L8C           | NOT APP       |
| 1L8C           | NOT APP       |
| 1LB1           | 2.81          |
| 1LB1           | 2.81          |
| 1LDK           | 3.1           |
| 1LJ2           | 2.38          |
| 1LJ2           | 2.38          |
| 1LOT           | 2.5           |
| 1LOT           | 2.5           |
| 1LP1           | 2.3           |
| 1LQM           | 3.2           |
| 1LQS           | 2.7           |
| 1LTX           | 2.7           |
| 1LTX           | 2.7           |
| 1LZW           | 2.5           |
| 1M1E           | 2.1           |
| 1M2O           | 2.5           |
| 1M2O           | 2.5           |
| 1M2Z           | 2.5           |
| 1M2Z           | 2.5           |
| 1M45           | 1.65          |
| 1M45           | 1.65          |
| 1M63           | 2.8           |
| 1M63           | 2.8           |
| 1M63           | 2.8           |
| 1M63           | 2.8           |
| 1MDU           | 2.2           |
| 1MJE           | 3.5           |
| 1MKW           | 2.3           |
| 1MWA           | 2.4           |
| 1MXE           | 1.7           |
| 1MXE           | 1.7           |
| 1MXE           | 1.7           |
| 1MXE           | 1.7           |
| 1MXE           | 1.7           |
| 1MXE           | 1.7           |
| 1MXE           | 1.7           |
| 1MZN           | 1.9           |
| 1MZN           | 1.9           |
| 1MZN           | 1.9           |
| 1MZN           | 1.9           |
| 1N0W           | 1.7           |
| 1N2D           | 2             |
| 1N4M           | 2.2           |
| 1N4Q           | 2.4           |
| 1N4Q           | 2.4           |
| 1N4Q           | 2.4           |
| 1N4Q           | 2.4           |
| 1N4Q           | 2.4           |
| 1N4Q           | 2.4           |
| 1N4Q           | 2.4           |
| 1N4Q           | 2.4           |
| 1N4Q           | 2.4           |
| 1N4Q           | 2.4           |

| A. PDB CODE | B. INTERFACE CHAINS | C. CHAIN | D. TITLE                                                                                |
|-------------|---------------------|----------|-----------------------------------------------------------------------------------------|
| 1N4Q        | I J                 | I        | PROTEIN GERANYLGERANYLTRANSFERASE TYPE-I COMPLEXED WITH A GGPP ANALOG AND A KKKSKT      |
| 1N4Q        | K L                 | L        | PROTEIN GERANYLGERANYLTRANSFERASE TYPE-I COMPLEXED WITH A GGPP ANALOG AND A KKKSKT      |
| 1NEX        | A B                 | A        | CRYSTAL STRUCTURE OF SCSKP1-SCCDC4-CPD PEPTIDE COMPLEX                                  |
| 1NEX        | C D                 | C        | CRYSTAL STRUCTURE OF SCSKP1-SCCDC4-CPD PEPTIDE COMPLEX                                  |
| 1NEX        | C D                 | C        | CRYSTAL STRUCTURE OF SCSKP1-SCCDC4-CPD PEPTIDE COMPLEX                                  |
| 1NF3        | B D                 | B        | STRUCTURE OF CDC42 IN A COMPLEX WITH THE GTPASE-BINDING DOMAIN OF THE CELL POLARITY PRO |
| 1NF5        | A B                 | A        | CRYSTAL STRUCTURE OF LACTOSE SYNTHASE, COMPLEX WITH GLUCOSE                             |
| 1NGM        | E F                 | F        | CRYSTAL STRUCTURE OF A YEAST BRF1-TBP-DNA TERNARY COMPLEX                               |
| 1NGM        | I J                 | I        | CRYSTAL STRUCTURE OF A YEAST BRF1-TBP-DNA TERNARY COMPLEX                               |
| 1NGM        | M N                 | M        | CRYSTAL STRUCTURE OF A YEAST BRF1-TBP-DNA TERNARY COMPLEX                               |
| 1NH2        | B D                 | D        | CRYSTAL STRUCTURE OF A YEAST TFIIA/TBP/DNA COMPLEX                                      |
| 1NIW        | A B                 | B        | CRYSTAL STRUCTURE OF ENDOTHELIAL NITRIC OXIDE SYNTHASE PEPTIDE BOUND TO CALMODULIN      |
| 1NIW        | C D                 | C        | CRYSTAL STRUCTURE OF ENDOTHELIAL NITRIC OXIDE SYNTHASE PEPTIDE BOUND TO CALMODULIN      |
| 1NIW        | C D                 | C        | CRYSTAL STRUCTURE OF ENDOTHELIAL NITRIC OXIDE SYNTHASE PEPTIDE BOUND TO CALMODULIN      |
| 1NIW        | C D                 | D        | CRYSTAL STRUCTURE OF ENDOTHELIAL NITRIC OXIDE SYNTHASE PEPTIDE BOUND TO CALMODULIN      |
| 1NIW        | E F                 | E        | CRYSTAL STRUCTURE OF ENDOTHELIAL NITRIC OXIDE SYNTHASE PEPTIDE BOUND TO CALMODULIN      |
| 1NIW        | E F                 | F        | CRYSTAL STRUCTURE OF ENDOTHELIAL NITRIC OXIDE SYNTHASE PEPTIDE BOUND TO CALMODULIN      |
| 1NIW        | G H                 | G        | CRYSTAL STRUCTURE OF ENDOTHELIAL NITRIC OXIDE SYNTHASE PEPTIDE BOUND TO CALMODULIN      |
| 1NKP        | A B                 | A        | CRYSTAL STRUCTURE OF MYC-MAX RECOGNIZING DNA                                            |
| 1NKP        | A B                 | B        | CRYSTAL STRUCTURE OF MYC-MAX RECOGNIZING DNA                                            |
| 1NKP        | A B                 | B        | CRYSTAL STRUCTURE OF MYC-MAX RECOGNIZING DNA                                            |
| 1NKP        | D E                 | D        | CRYSTAL STRUCTURE OF MYC-MAX RECOGNIZING DNA                                            |
| 1NKP        | D E                 | D        | CRYSTAL STRUCTURE OF MYC-MAX RECOGNIZING DNA                                            |
| 1NKP        | D E                 | E        | CRYSTAL STRUCTURE OF MYC-MAX RECOGNIZING DNA                                            |
| 1NLW        | A B                 | A        | CRYSTAL STRUCTURE OF MAD-MAX RECOGNIZING DNA                                            |
| 1NLW        | A B                 | A        | CRYSTAL STRUCTURE OF MAD-MAX RECOGNIZING DNA                                            |
| 1NLW        | A B                 | B        | CRYSTAL STRUCTURE OF MAD-MAX RECOGNIZING DNA                                            |
| 1NLW        | A B                 | B        | CRYSTAL STRUCTURE OF MAD-MAX RECOGNIZING DNA                                            |
| 1NLW        | D E                 | D        | CRYSTAL STRUCTURE OF MAD-MAX RECOGNIZING DNA                                            |
| 1NLW        | D E                 | E        | CRYSTAL STRUCTURE OF MAD-MAX RECOGNIZING DNA                                            |
| 1NLW        | D E                 | E        | CRYSTAL STRUCTURE OF MAD-MAX RECOGNIZING DNA                                            |
| 1NNU        | C B                 | B        | MBP-L30                                                                                 |
| 1NRL        | A C                 | A        | CRYSTAL STRUCTURE OF THE HUMAN PXR-LBD IN COMPLEX WITH AN SRC-1 COACTIVATOR PEPTIDE AI  |
| 1NRL        | A C                 | C        | CRYSTAL STRUCTURE OF THE HUMAN PXR-LBD IN COMPLEX WITH AN SRC-1 COACTIVATOR PEPTIDE AI  |
| 1NRO        | L H                 | L        | CRYSTALLOGRAPHIC STRUCTURES OF THROMBIN COMPLEXED WITH THROMBIN RECEPTOR PEPTIDES:      |
| 1NU7        | A B                 | A        | STAPHYLOCOAGULASE-THROMBIN COMPLEX                                                      |
| 1NU7        | B D                 | D        | STAPHYLOCOAGULASE-THROMBIN COMPLEX                                                      |
| 1NU7        | F H                 | H        | STAPHYLOCOAGULASE-THROMBIN COMPLEX                                                      |
| 1NVM        | A B                 | A        | CRYSTAL STRUCTURE OF A BIFUNCTIONAL ALDOLASE-DEHYDROGENASE : SEQUESTERING A REACTIVI    |
| 1NVM        | E F                 | F        | CRYSTAL STRUCTURE OF A BIFUNCTIONAL ALDOLASE-DEHYDROGENASE : SEQUESTERING A REACTIVI    |
| 1O9U        | A B                 | A        | GLYCOGEN SYNTHASE KINASE 3 BETA COMPLEXED WITH AXIN PEPTIDE                             |
| 1O9U        | A B                 | B        | GLYCOGEN SYNTHASE KINASE 3 BETA COMPLEXED WITH AXIN PEPTIDE                             |
| 1OC0        | A B                 | A        | PLASMINOGEN ACTIVATOR INHIBITOR-1 COMPLEX WITH SOMATOMEDIN B DOMAIN OF VITRONECTIN      |
| 1OHZ        | A B                 | B        | COHESIN-DOCKERIN COMPLEX FROM THE CELLULOSOME OF CLOSTRIDIUM THERMOCELLUM               |
| 1OQD        | B L                 | L        | CRYSTAL STRUCTURE OF STALL-1 AND BCMA                                                   |
| 1OR0        | A B                 | A        | CRYSTAL STRUCTURES OF GLUTARYL 7-AMINOCEPHALOSPORANIC ACID ACYLASE: INSIGHT INTO AUT    |
| 1OR0        | A B                 | B        | CRYSTAL STRUCTURES OF GLUTARYL 7-AMINOCEPHALOSPORANIC ACID ACYLASE: INSIGHT INTO AUT    |
| 1OR0        | A B                 | B        | CRYSTAL STRUCTURES OF GLUTARYL 7-AMINOCEPHALOSPORANIC ACID ACYLASE: INSIGHT INTO AUT    |
| 1OR0        | C D                 | C        | CRYSTAL STRUCTURES OF GLUTARYL 7-AMINOCEPHALOSPORANIC ACID ACYLASE: INSIGHT INTO AUT    |
| 1OR7        | B F                 | F        | CRYSTAL STRUCTURE OF ESCHERICHIA COLI SIGMAE WITH THE CYTOPLASMIC DOMAIN OF ITS ANTI-S  |
| 1OSV        | A C                 | A        | STRUCTURAL BASIS FOR BILE ACID BINDING AND ACTIVATION OF THE NUCLEAR RECEPTOR FXR       |
| 1OSV        | A C                 | C        | STRUCTURAL BASIS FOR BILE ACID BINDING AND ACTIVATION OF THE NUCLEAR RECEPTOR FXR       |
| 1OSV        | B D                 | B        | STRUCTURAL BASIS FOR BILE ACID BINDING AND ACTIVATION OF THE NUCLEAR RECEPTOR FXR       |
| 1OW3        | A B                 | A        | CRYSTAL STRUCTURE OF RHOA.GDP.MGF3-IN COMPLEX WITH RHOGAP                               |
| 1OW3        | A B                 | B        | CRYSTAL STRUCTURE OF RHOA.GDP.MGF3-IN COMPLEX WITH RHOGAP                               |
| 1OW7        | B E                 | E        | PAXILLIN LD4 MOTIF BOUND TO THE FOCAL ADHESION TARGETING (FAT) DOMAIN OF THE FOCAL ADHI |
| 1OXX        | A B                 | A        | COMPLEX BETWEEN YPD1 AND SLN1 RESPONSE REGULATOR DOMAIN IN SPACE GROUP P3(2)            |
| 1OXX        | C D                 | D        | COMPLEX BETWEEN YPD1 AND SLN1 RESPONSE REGULATOR DOMAIN IN SPACE GROUP P3(2)            |
| 1OXX        | E F                 | F        | COMPLEX BETWEEN YPD1 AND SLN1 RESPONSE REGULATOR DOMAIN IN SPACE GROUP P3(2)            |
| 1OXX        | G H                 | G        | COMPLEX BETWEEN YPD1 AND SLN1 RESPONSE REGULATOR DOMAIN IN SPACE GROUP P3(2)            |
| 1OXX        | I J                 | J        | COMPLEX BETWEEN YPD1 AND SLN1 RESPONSE REGULATOR DOMAIN IN SPACE GROUP P3(2)            |
| 1P22        | A B                 | B        | STRUCTURE OF A BETA-TRCP1-SKP1-BETA-CATENIN COMPLEX: DESTRUCTION MOTIF BINDING AND LYS  |
| 1P27        | A B                 | A        | CRYSTAL STRUCTURE OF THE HUMAN Y14/MAGOH COMPLEX                                        |

TABLE S4

Jochim, et al

| A. PDB<br>CODE | E. FUNCTION                       | F. $\Delta\Delta G_{\text{AVG,HELIX}}$<br>(KCAL/MOL) | G. $\Delta\Delta G_{\text{SUM,HELIX}}$<br>(KCAL/MOL) | H. # HOTSPOT<br>RESIDUES | I. HELIX<br>LENGTH |
|----------------|-----------------------------------|------------------------------------------------------|------------------------------------------------------|--------------------------|--------------------|
| 1N4Q           | TRANSFERASE                       | 1.5                                                  | 3.0                                                  | 2                        | 10                 |
| 1N4Q           | TRANSFERASE                       | 1.9                                                  | 5.6                                                  | 3                        | 13                 |
| 1NEX           | LIGASE, CELL CYCLE                | 1.3                                                  | 2.5                                                  | 2                        | 8                  |
| 1NEX           | LIGASE, CELL CYCLE                | 1.2                                                  | 2.4                                                  | 2                        | 13                 |
| 1NEX           | LIGASE, CELL CYCLE                | 1.0                                                  | 2.0                                                  | 2                        | 10                 |
| 1NF3           | SIGNALING PROTEIN                 | 1.2                                                  | 2.3                                                  | 2                        | 15                 |
| 1NF5           | TRANSFERASE/TRANSFERASE           | 1.5                                                  | 2.9                                                  | 2                        | 12                 |
| 1NGM           | TRANSCRIPTION/DNA                 | 1.3                                                  | 2.5                                                  | 2                        | 5                  |
| 1NGM           | TRANSCRIPTION/DNA                 | 1.9                                                  | 5.6                                                  | 3                        | 17                 |
| 1NGM           | TRANSCRIPTION/DNA                 | 1.4                                                  | 2.8                                                  | 2                        | 19                 |
| 1NH2           | TRANSCRIPTION/DNA                 | 1.6                                                  | 4.8                                                  | 3                        | 22                 |
| 1NIW           | SIGNALING PROTEIN/OXIDOREDUCTASE  | 1.7                                                  | 8.4                                                  | 5                        | 12                 |
| 1NIW           | SIGNALING PROTEIN/OXIDOREDUCTASE  | 1.4                                                  | 2.7                                                  | 2                        | 15                 |
| 1NIW           | SIGNALING PROTEIN/OXIDOREDUCTASE  | 1.8                                                  | 3.6                                                  | 2                        | 13                 |
| 1NIW           | SIGNALING PROTEIN/OXIDOREDUCTASE  | 1.9                                                  | 9.3                                                  | 5                        | 14                 |
| 1NIW           | SIGNALING PROTEIN/OXIDOREDUCTASE  | 1.9                                                  | 3.7                                                  | 2                        | 15                 |
| 1NIW           | SIGNALING PROTEIN/OXIDOREDUCTASE  | 1.8                                                  | 12.9                                                 | 7                        | 13                 |
| 1NIW           | SIGNALING PROTEIN/OXIDOREDUCTASE  | 1.1                                                  | 2.1                                                  | 2                        | 15                 |
| 1NKP           | TRANSCRIPTION/DNA                 | 1.6                                                  | 14.1                                                 | 9                        | 44                 |
| 1NKP           | TRANSCRIPTION/DNA                 | 1.9                                                  | 3.8                                                  | 2                        | 27                 |
| 1NKP           | TRANSCRIPTION/DNA                 | 1.9                                                  | 14.9                                                 | 8                        | 42                 |
| 1NKP           | TRANSCRIPTION/DNA                 | 1.7                                                  | 15.1                                                 | 9                        | 43                 |
| 1NKP           | TRANSCRIPTION/DNA                 | 1.8                                                  | 3.6                                                  | 2                        | 28                 |
| 1NKP           | TRANSCRIPTION/DNA                 | 1.8                                                  | 14.3                                                 | 8                        | 42                 |
| 1NLW           | TRANSCRIPTION/DNA                 | 1.8                                                  | 16.2                                                 | 9                        | 41                 |
| 1NLW           | TRANSCRIPTION/DNA                 | 1.2                                                  | 2.3                                                  | 2                        | 23                 |
| 1NLW           | TRANSCRIPTION/DNA                 | 1.5                                                  | 3.0                                                  | 2                        | 24                 |
| 1NLW           | TRANSCRIPTION/DNA                 | 1.6                                                  | 8.2                                                  | 5                        | 40                 |
| 1NLW           | TRANSCRIPTION/DNA                 | 1.8                                                  | 10.7                                                 | 6                        | 40                 |
| 1NLW           | TRANSCRIPTION/DNA                 | 1.7                                                  | 3.4                                                  | 2                        | 22                 |
| 1NLW           | TRANSCRIPTION/DNA                 | 1.5                                                  | 9.1                                                  | 6                        | 40                 |
| 1NMU           | SUGAR BINDING PROTEIN/RIBOSOME    | 1.3                                                  | 4.0                                                  | 3                        | 11                 |
| 1NRL           | TRANSCRIPTION                     | 1.8                                                  | 3.6                                                  | 2                        | 7                  |
| 1NRL           | TRANSCRIPTION                     | 1.3                                                  | 5.1                                                  | 4                        | 8                  |
| 1NRO           | SERINE PROTEINASE/RECEPTOR        | 1.5                                                  | 3.0                                                  | 2                        | 10                 |
| 1NU7           | HYDROLASE/PROTEIN BINDING         | 1.5                                                  | 4.4                                                  | 3                        | 8                  |
| 1NU7           | HYDROLASE/PROTEIN BINDING         | 1.2                                                  | 2.3                                                  | 2                        | 24                 |
| 1NU7           | HYDROLASE/PROTEIN BINDING         | 1.4                                                  | 4.3                                                  | 3                        | 40                 |
| 1NVM           | LYASE/OXIDOREDUCTASE              | 1.4                                                  | 2.7                                                  | 2                        | 11                 |
| 1NVM           | LYASE/OXIDOREDUCTASE              | 1.8                                                  | 3.5                                                  | 2                        | 17                 |
| 1O9U           | KINASE                            | 1.2                                                  | 3.5                                                  | 3                        | 13                 |
| 1O9U           | KINASE                            | 1.8                                                  | 5.4                                                  | 3                        | 17                 |
| 1OCO           | HYDROLASE/INHIBITOR               | 1.8                                                  | 3.5                                                  | 2                        | 15                 |
| 1OHZ           | CELL ADHESION                     | 1.7                                                  | 6.7                                                  | 4                        | 12                 |
| 1OQD           | IMMUNE RESPONSE                   | 1.4                                                  | 4.1                                                  | 3                        | 7                  |
| 1OR0           | HYDROLASE                         | 1.9                                                  | 3.7                                                  | 2                        | 10                 |
| 1OR0           | HYDROLASE                         | 1.1                                                  | 2.2                                                  | 2                        | 5                  |
| 1OR0           | HYDROLASE                         | 1.8                                                  | 3.6                                                  | 2                        | 7                  |
| 1OR0           | HYDROLASE                         | 1.5                                                  | 4.5                                                  | 3                        | 13                 |
| 1OR7           | TRANSCRIPTION                     | 1.8                                                  | 7.0                                                  | 4                        | 10                 |
| 1OSV           | DNA BINDING PROTEIN               | 1.0                                                  | 2.0                                                  | 2                        | 25                 |
| 1OSV           | DNA BINDING PROTEIN               | 1.6                                                  | 4.9                                                  | 3                        | 8                  |
| 1OSV           | DNA BINDING PROTEIN               | 1.8                                                  | 3.6                                                  | 2                        | 10                 |
| 1OW3           | GENE REGULATION/SIGNALING PROTEIN | 1.9                                                  | 3.8                                                  | 2                        | 13                 |
| 1OW3           | GENE REGULATION/SIGNALING PROTEIN | 1.8                                                  | 5.4                                                  | 3                        | 9                  |
| 1OW7           | TRANSFERASE                       | 1.3                                                  | 3.8                                                  | 3                        | 10                 |
| 1OXX           | SIGNALING PROTEIN                 | 1.8                                                  | 3.6                                                  | 2                        | 26                 |
| 1OXX           | SIGNALING PROTEIN                 | 1.3                                                  | 2.5                                                  | 2                        | 14                 |
| 1OXX           | SIGNALING PROTEIN                 | 1.4                                                  | 2.8                                                  | 2                        | 14                 |
| 1OXX           | SIGNALING PROTEIN                 | 1.7                                                  | 6.8                                                  | 4                        | 26                 |
| 1OXX           | SIGNALING PROTEIN                 | 1.4                                                  | 5.6                                                  | 4                        | 14                 |
| 1P22           | SIGNALING PROTEIN                 | 1.2                                                  | 3.5                                                  | 3                        | 8                  |
| 1P27           | RNA BINDING PROTEIN               | 1.4                                                  | 2.7                                                  | 2                        | 15                 |

TABLE S4

Jochim, et al

| A. PDB<br>CODE | J. HELIX START<br>RESIDUE # | K. HELIX END<br>RESIDUE # |
|----------------|-----------------------------|---------------------------|
| 1N4Q           | 274                         | 283                       |
| 1N4Q           | 242                         | 254                       |
| 1NEX           | 163                         | 170                       |
| 1NEX           | 144                         | 156                       |
| 1NEX           | 132                         | 141                       |
| 1NF3           | 165                         | 179                       |
| 1NF5           | 23                          | 34                        |
| 1NGM           | 468                         | 472                       |
| 1NGM           | 131                         | 147                       |
| 1NGM           | 129                         | 147                       |
| 1NH2           | 34                          | 55                        |
| 1NIW           | 496                         | 507                       |
| 1NIW           | 6                           | 20                        |
| 1NIW           | 81                          | 93                        |
| 1NIW           | 496                         | 509                       |
| 1NIW           | 6                           | 20                        |
| 1NIW           | 496                         | 508                       |
| 1NIW           | 6                           | 20                        |
| 1NKP           | 939                         | 982                       |
| 1NKP           | 203                         | 229                       |
| 1NKP           | 239                         | 280                       |
| 1NKP           | 539                         | 581                       |
| 1NKP           | 500                         | 527                       |
| 1NKP           | 739                         | 780                       |
| 1NLW           | 40                          | 80                        |
| 1NLW           | 5                           | 27                        |
| 1NLW           | 204                         | 227                       |
| 1NLW           | 239                         | 278                       |
| 1NLW           | 539                         | 578                       |
| 1NLW           | 706                         | 727                       |
| 1NLW           | 739                         | 778                       |
| 1NMU           | 53                          | 63                        |
| 1NRL           | 423                         | 429                       |
| 1NRL           | 688                         | 695                       |
| 1NRO           | 14                          | 14                        |
| 1NU7           | 14                          | 14                        |
| 1NU7           | 24                          | 47                        |
| 1NU7           | 56                          | 95                        |
| 1NVM           | 123                         | 133                       |
| 1NVM           | 172                         | 188                       |
| 1O9U           | 262                         | 274                       |
| 1O9U           | 384                         | 400                       |
| 1OCO           | 129                         | 143                       |
| 1OHZ           | 45                          | 56                        |
| 1OQD           | 17                          | 23                        |
| 1OR0           | 74                          | 83                        |
| 1OR0           | 151                         | 155                       |
| 1OR0           | 505                         | 511                       |
| 1OR0           | 51                          | 63                        |
| 1OR7           | 55                          | 64                        |
| 1OSV           | 277                         | 301                       |
| 1OSV           | 3                           | 10                        |
| 1OSV           | 310                         | 319                       |
| 1OW3           | 192                         | 204                       |
| 1OW3           | 67                          | 75                        |
| 1OW7           | 3                           | 12                        |
| 1OXX           | 27                          | 52                        |
| 1OXX           | 1097                        | 1110                      |
| 1OXX           | 1097                        | 1110                      |
| 1OXX           | 27                          | 52                        |
| 1OXX           | 1097                        | 1110                      |
| 1P22           | 111                         | 118                       |
| 1P27           | 54                          | 68                        |

| A. PDB<br>CODE | L. HELIX SEQUENCE                            |
|----------------|----------------------------------------------|
| 1N4Q           | ESAWNYLKGI                                   |
| 1N4Q           | EKELNRIKRCIM                                 |
| 1NEX           | PEEIRRTF                                     |
| 1NEX           | KPLLDAGCKVVAE                                |
| 1NEX           | YEIILAANYL                                   |
| 1NF3           | LKNVFDEAILAALEP                              |
| 1NF5           | LLEWACVLFHTS                                 |
| 1NGM           | EELNA                                        |
| 1NGM           | DSKLASRKYARIHQKIG                            |
| 1NGM           | EDDSKLASRKYARIHQKIG                          |
| 1NH2           | ASLAMRVLETFDKVVVAETLKDN                      |
| 1NIW           | FKEVANAVKISA                                 |
| 1NIW           | EEQIAEFKEAFSLFD                              |
| 1NIW           | SEEEIREAFRVFD                                |
| 1NIW           | FKEVANAVKISASL                               |
| 1NIW           | EEQIAEFKEAFSLFD                              |
| 1NIW           | FKEVANAVKISAS                                |
| 1NIW           | EEQIAEFKEAFSLFD                              |
| 1NKP           | KVVILKKATAYILSVQAEEQKLISEEDLLRKRREQLKHKLEQLG |
| 1NKP           | KRAHHNALERKRRDHIKDSFHSLRDSV                  |
| 1NKP           | RAQILDKATEYIQYMRRKNHTHQQDIDDLKRQNALLEQQVRA   |
| 1NKP           | KVVILKKATAYILSVQAEEQKLISEEDLLRKRREQLKHKLEQL  |
| 1NKP           | NVKRRTHNVLERQRRNELKRSFFALRDQ                 |
| 1NKP           | RAQILDKATEYIQYMRRKNHTHQQDIDDLKRQNALLEQQVRA   |
| 1NLW           | LSLLTKAKLHIKKLESDRKAHVHQIDQLQREQRHLKRQLEK    |
| 1NLW           | THNEMEKNNRAHLRLSLEKLGGL                      |
| 1NLW           | RAHHNALERKRRDHIKDSFHSLRD                     |
| 1NLW           | RAQILDKATEYIQYMRRKNHTHQQDIDDLKRQNALLEQQV     |
| 1NLW           | TLSSLTKAKLHIKKLESDRKAHVHQIDQLQREQRHLKRQL     |
| 1NLW           | HHNALERKRRDHIKDSFHSLRD                       |
| 1NLW           | RAQILDKATEYIQYMRRKNHTHQQDIDDLKRQNALLEQQV     |
| 1NMU           | KSELEYAMLS                                   |
| 1NRL           | PLMQELF                                      |
| 1NRL           | KILHRLLQ                                     |
| 1NRO           | TERELLESYI                                   |
| 1NU7           | ERELLESY                                     |
| 1NU7           | DWYLYKGRLLTSLESQFINALGILET                   |
| 1NU7           | KDAKDCLMTRILGEDQYLLERKKVQYEEYKLYKLYKEEN      |
| 1NVM           | KQHIEYARNLG                                  |
| 1NVM           | IDEFTETTSKAIEVIGG                            |
| 1O9U           | GVDQLVEIHKVLG                                |
| 1O9U           | EPQKFAEELIHRLEAVQ                            |
| 1OCO           | VERARFIINDWVKTH                              |
| 1OHZ           | STDVLLLSRYLL                                 |
| 1OQD           | CQLRCSS                                      |
| 1OR0           | EQTTVWLLTN                                   |
| 1OR0           | EQYFD                                        |
| 1OR0           | REQVEAA                                      |
| 1OR0           | GDNILRLYGEARG                                |
| 1OR7           | ISSRVMAAIE                                   |
| 1OSV           | AEENFLILTEMATSHVQILVEFTKR                    |
| 1OSV           | ALLRYLLD                                     |
| 1OSV           | HEDQIALLKG                                   |
| 1OW3           | NTNLAVVFGPNLL                                |
| 1OW3           | DRLRPLSYP                                    |
| 1OW7           | RELDELMASL                                   |
| 1OXX           | FSKGLIQFIDQAQTTFMQMRQLDG                     |
| 1OXX           | HVNQEVIKRMNLNLE                              |
| 1OXX           | HVNQEVIKRMNLNLE                              |
| 1OXX           | FSKGLIQFIDQAQTTFMQMRQLDG                     |
| 1OXX           | HVNQEVIKRMNLNLE                              |
| 1P22           | PEEIRKTF                                     |
| 1P27           | KSVMEELKRIIDDSE                              |

| A. PDB<br>CODE | M. RESOLUTION |
|----------------|---------------|
| 1N4Q           | 2.4           |
| 1N4Q           | 2.4           |
| 1NEX           | 2.7           |
| 1NEX           | 2.7           |
| 1NEX           | 2.7           |
| 1NF3           | 2.1           |
| 1NF5           | 2             |
| 1NGM           | 2.95          |
| 1NGM           | 2.95          |
| 1NGM           | 2.95          |
| 1NH2           | 1.9           |
| 1NIW           | 2.05          |
| 1NIW           | 2.05          |
| 1NIW           | 2.05          |
| 1NIW           | 2.05          |
| 1NIW           | 2.05          |
| 1NIW           | 2.05          |
| 1NKP           | 1.8           |
| 1NKP           | 1.8           |
| 1NKP           | 1.8           |
| 1NKP           | 1.8           |
| 1NKP           | 1.8           |
| 1NKP           | 1.8           |
| 1NLW           | 2             |
| 1NLW           | 2             |
| 1NLW           | 2             |
| 1NLW           | 2             |
| 1NLW           | 2             |
| 1NLW           | 2             |
| 1NLW           | 2             |
| 1NLU           | 2.31          |
| 1NRL           | 2             |
| 1NRL           | 2             |
| 1NRO           | 3.1           |
| 1NU7           | 2.2           |
| 1NU7           | 2.2           |
| 1NU7           | 2.2           |
| 1NVM           | 1.7           |
| 1NVM           | 1.7           |
| 1O9U           | 2.4           |
| 1O9U           | 2.4           |
| 1OC0           | 2.28          |
| 1OHZ           | 2.2           |
| 1OQD           | 2.6           |
| 1OR0           | 2             |
| 1OR0           | 2             |
| 1OR0           | 2             |
| 1OR0           | 2             |
| 1OR7           | 2             |
| 1OSV           | 2.5           |
| 1OSV           | 2.5           |
| 1OSV           | 2.5           |
| 1OW3           | 1.8           |
| 1OW3           | 1.8           |
| 1OW7           | 2.6           |
| 1OXX           | 2.1           |
| 1OXX           | 2.1           |
| 1OXX           | 2.1           |
| 1OXX           | 2.1           |
| 1OXX           | 2.1           |
| 1P22           | 2.95          |
| 1P27           | 2             |



| A. PDB CODE | B. INTERFACE CHAINS | C. CHAIN | D. TITLE                                                                               |
|-------------|---------------------|----------|----------------------------------------------------------------------------------------|
| 1P4Q        | A B                 | B        | SOLUTION STRUCTURE OF THE CITED2 TRANSACTIVATION DOMAIN IN COMPLEX WITH THE P300 CH1 D |
| 1P8V        | B C                 | B        | CRYSTAL STRUCTURE OF THE COMPLEX OF PLATELET RECEPTOR GPIB- ALPHA AND ALPHA-THROMBIN   |
| 1P9M        | A B                 | B        | CRYSTAL STRUCTURE OF THE HEXAMERIC HUMAN IL-6/IL-6 ALPHA RECEPTOR/GP130 COMPLEX        |
| 1PCQ        | F T                 | F        | CRYSTAL STRUCTURE OF GROEL-GROES                                                       |
| 1PD7        | A B                 | A        | EXTENDED SID OF MAD1 BOUND TO THE PAH2 DOMAIN OF MSIN3B                                |
| 1PD7        | A B                 | B        | EXTENDED SID OF MAD1 BOUND TO THE PAH2 DOMAIN OF MSIN3B                                |
| 1PGR        | A B                 | A        | 2:2 COMPLEX OF G-CSF WITH ITS RECEPTOR                                                 |
| 1PK1        | A B                 | B        | HETERO SAM DOMAIN STRUCTURE OF PH AND SCM.                                             |
| 1PQ1        | A B                 | A        | CRYSTAL STRUCTURE OF BCL-XL/BIM                                                        |
| 1PSB        | A C                 | A        | SOLUTION STRUCTURE OF CALCIUM LOADED S100B COMPLEXED TO A PEPTIDE FROM N-TERMINAL RE   |
| 1PSB        | A C                 | C        | SOLUTION STRUCTURE OF CALCIUM LOADED S100B COMPLEXED TO A PEPTIDE FROM N-TERMINAL RE   |
| 1PSB        | B D                 | D        | SOLUTION STRUCTURE OF CALCIUM LOADED S100B COMPLEXED TO A PEPTIDE FROM N-TERMINAL RE   |
| 1PZL        | A B                 | A        | CRYSTAL STRUCTURE OF HNF4A LBD IN COMPLEX WITH THE LIGAND AND THE COACTIVATOR SRC-1 PE |
| 1QO0        | A D                 | A        | AMIDE RECEPTOR OF THE AMIDASE OPERON OF PSEUDOMONAS AERUGINOSA (AMIC) COMPLEXED WIT    |
| 1QO0        | B E                 | B        | AMIDE RECEPTOR OF THE AMIDASE OPERON OF PSEUDOMONAS AERUGINOSA (AMIC) COMPLEXED WIT    |
| 1QS7        | A B                 | A        | THE 1.8 ANGSTROM STRUCTURE OF CALMODULIN RS20 PEPTIDE COMPLEX                          |
| 1QS7        | A B                 | A        | THE 1.8 ANGSTROM STRUCTURE OF CALMODULIN RS20 PEPTIDE COMPLEX                          |
| 1QS7        | A B                 | B        | THE 1.8 ANGSTROM STRUCTURE OF CALMODULIN RS20 PEPTIDE COMPLEX                          |
| 1QTY        | S T                 | S        | VASCULAR ENDOTHELIAL GROWTH FACTOR IN COMPLEX WITH DOMAIN 2 OF THE FLT-1 RECEPTOR      |
| 1QTY        | V Y                 | V        | VASCULAR ENDOTHELIAL GROWTH FACTOR IN COMPLEX WITH DOMAIN 2 OF THE FLT-1 RECEPTOR      |
| 1RON        | A B                 | B        | CRYSTAL STRUCTURE OF HETERODIMERIC ECDSYONE RECEPTOR DNA BINDING COMPLEX               |
| 1R1K        | D A                 | A        | CRYSTAL STRUCTURE OF THE LIGAND-BINDING DOMAINS OF THE HETERODIMER ECR/USP BOUND TO I  |
| 1R1K        | D A                 | D        | CRYSTAL STRUCTURE OF THE LIGAND-BINDING DOMAINS OF THE HETERODIMER ECR/USP BOUND TO I  |
| 1R4M        | A B                 | A        | APPBP1-UBA3-NEDD8, AN E1-UBIQUITIN-LIKE PROTEIN COMPLEX                                |
| 1R4M        | A B                 | B        | APPBP1-UBA3-NEDD8, AN E1-UBIQUITIN-LIKE PROTEIN COMPLEX                                |
| 1R4M        | A I                 | I        | APPBP1-UBA3-NEDD8, AN E1-UBIQUITIN-LIKE PROTEIN COMPLEX                                |
| 1R4M        | C D                 | C        | APPBP1-UBA3-NEDD8, AN E1-UBIQUITIN-LIKE PROTEIN COMPLEX                                |
| 1R4M        | C D                 | C        | APPBP1-UBA3-NEDD8, AN E1-UBIQUITIN-LIKE PROTEIN COMPLEX                                |
| 1R4M        | C D                 | D        | APPBP1-UBA3-NEDD8, AN E1-UBIQUITIN-LIKE PROTEIN COMPLEX                                |
| 1R4M        | E F                 | E        | APPBP1-UBA3-NEDD8, AN E1-UBIQUITIN-LIKE PROTEIN COMPLEX                                |
| 1R4M        | E F                 | F        | APPBP1-UBA3-NEDD8, AN E1-UBIQUITIN-LIKE PROTEIN COMPLEX                                |
| 1R4M        | F K                 | F        | APPBP1-UBA3-NEDD8, AN E1-UBIQUITIN-LIKE PROTEIN COMPLEX                                |
| 1R4M        | G H                 | G        | APPBP1-UBA3-NEDD8, AN E1-UBIQUITIN-LIKE PROTEIN COMPLEX                                |
| 1R4M        | G H                 | G        | APPBP1-UBA3-NEDD8, AN E1-UBIQUITIN-LIKE PROTEIN COMPLEX                                |
| 1R4M        | G H                 | H        | APPBP1-UBA3-NEDD8, AN E1-UBIQUITIN-LIKE PROTEIN COMPLEX                                |
| 1R4M        | H L                 | H        | APPBP1-UBA3-NEDD8, AN E1-UBIQUITIN-LIKE PROTEIN COMPLEX                                |
| 1R60        | A C                 | A        | ATP-DEPENDENT CLP PROTEASE ATP-BINDING SUBUNIT CLPA/ATP- DEPENDENT CLP PROTEASE ADAPTC |
| 1R60        | A C                 | C        | ATP-DEPENDENT CLP PROTEASE ATP-BINDING SUBUNIT CLPA/ATP- DEPENDENT CLP PROTEASE ADAPTC |
| 1R60        | A D                 | A        | ATP-DEPENDENT CLP PROTEASE ATP-BINDING SUBUNIT CLPA/ATP- DEPENDENT CLP PROTEASE ADAPTC |
| 1R60        | A D                 | D        | ATP-DEPENDENT CLP PROTEASE ATP-BINDING SUBUNIT CLPA/ATP- DEPENDENT CLP PROTEASE ADAPTC |
| 1R60        | B D                 | D        | ATP-DEPENDENT CLP PROTEASE ATP-BINDING SUBUNIT CLPA/ATP- DEPENDENT CLP PROTEASE ADAPTC |
| 1R8Q        | A E                 | E        | FULL-LENGTH ARF1-GDP-MG IN COMPLEX WITH BREFELDIN A AND A SEC7 DOMAIN                  |
| 1R8Q        | A F                 | F        | FULL-LENGTH ARF1-GDP-MG IN COMPLEX WITH BREFELDIN A AND A SEC7 DOMAIN                  |
| 1R8U        | A B                 | B        | NMR STRUCTURE OF CBP TAZ1/CITED2 COMPLEX                                               |
| 1R8U        | A B                 | B        | NMR STRUCTURE OF CBP TAZ1/CITED2 COMPLEX                                               |
| 1RDT        | A D                 | A        | CRYSTAL STRUCTURE OF A NEW REXINOID BOUND TO THE RXRALPHA LIGAND BINDING DOAMIN IN TI  |
| 1RDT        | A D                 | D        | CRYSTAL STRUCTURE OF A NEW REXINOID BOUND TO THE RXRALPHA LIGAND BINDING DOAMIN IN TI  |
| 1RDT        | A D                 | D        | CRYSTAL STRUCTURE OF A NEW REXINOID BOUND TO THE RXRALPHA LIGAND BINDING DOAMIN IN TI  |
| 1RE0        | A B                 | A        | STRUCTURE OF ARF1-GDP BOUND TO SEC7 DOMAIN COMPLEXED WITH BREFELDIN A                  |
| 1RE0        | A B                 | B        | STRUCTURE OF ARF1-GDP BOUND TO SEC7 DOMAIN COMPLEXED WITH BREFELDIN A                  |
| 1RH5        | A B                 | A        | THE STRUCTURE OF A PROTEIN CONDUCTING CHANNEL                                          |
| 1RH5        | A B                 | A        | THE STRUCTURE OF A PROTEIN CONDUCTING CHANNEL                                          |
| 1RH5        | A B                 | A        | THE STRUCTURE OF A PROTEIN CONDUCTING CHANNEL                                          |
| 1RH5        | A B                 | B        | THE STRUCTURE OF A PROTEIN CONDUCTING CHANNEL                                          |
| 1RH5        | A B                 | B        | THE STRUCTURE OF A PROTEIN CONDUCTING CHANNEL                                          |
| 1RH5        | A C                 | C        | THE STRUCTURE OF A PROTEIN CONDUCTING CHANNEL                                          |
| 1RIW        | B C                 | B        | THROMBIN IN COMPLEX WITH NATURAL PRODUCT INHIBITOR OSCILLARIN                          |
| 1RK8        | A B                 | B        | STRUCTURE OF THE CYTOSOLIC PROTEIN PYM BOUND TO THE MAGO- Y14 CORE OF THE EXON JUNCTIO |
| 1RKE        | A B                 | A        | HUMAN VINCULIN HEAD (1-258) IN COMPLEX WITH HUMAN VINCULIN TAIL (879-1066)             |
| 1RKE        | A B                 | B        | HUMAN VINCULIN HEAD (1-258) IN COMPLEX WITH HUMAN VINCULIN TAIL (879-1066)             |
| 1RKE        | A B                 | B        | HUMAN VINCULIN HEAD (1-258) IN COMPLEX WITH HUMAN VINCULIN TAIL (879-1066)             |
| 1RM1        | B C                 | C        | STRUCTURE OF A YEAST TFIIIA/TBP/TATA-BOX DNA COMPLEX                                   |
| 1RM1        | B C                 | C        | STRUCTURE OF A YEAST TFIIIA/TBP/TATA-BOX DNA COMPLEX                                   |

TABLE S4

Jochim, et al

| A. PDB<br>CODE | E. FUNCTION                           | F. $\Delta\Delta G_{\text{AVG,HELIX}}$<br>(KCAL/MOL) | G. $\Delta\Delta G_{\text{SUM,HELIX}}$<br>(KCAL/MOL) | H. # HOTSPOT<br>RESIDUES | I. HELIX<br>LENGTH |
|----------------|---------------------------------------|------------------------------------------------------|------------------------------------------------------|--------------------------|--------------------|
| 1P4Q           | TRANSCRIPTION/TRANSFERASE             | 1.2                                                  | 2.4                                                  | 2                        | 14                 |
| 1P8V           | MEMBRANE PROTEIN/HYDROLASE            | 1.7                                                  | 5.2                                                  | 3                        | 8                  |
| 1P9M           | SIGNALING PROTEIN/CYTOKINE            | 1.2                                                  | 2.3                                                  | 2                        | 18                 |
| 1PCQ           | CHAPERONE                             | 1.3                                                  | 3.9                                                  | 3                        | 13                 |
| 1PD7           | TRANSCRIPTION                         | 1.5                                                  | 4.5                                                  | 3                        | 17                 |
| 1PD7           | TRANSCRIPTION                         | 1.6                                                  | 6.4                                                  | 4                        | 20                 |
| 1PGR           | CYTOKINE                              | 1.6                                                  | 4.7                                                  | 3                        | 29                 |
| 1PK1           | TRANSCRIPTION REPRESSION              | 1.7                                                  | 5.0                                                  | 3                        | 14                 |
| 1PQ1           | APOPTOSIS                             | 1.2                                                  | 2.4                                                  | 2                        | 13                 |
| 1PSB           | METAL BINDING PROTEIN                 | 1.4                                                  | 4.3                                                  | 3                        | 12                 |
| 1PSB           | METAL BINDING PROTEIN                 | 1.9                                                  | 5.8                                                  | 3                        | 16                 |
| 1PSB           | METAL BINDING PROTEIN                 | 1.8                                                  | 9.1                                                  | 5                        | 16                 |
| 1PZL           | TRANSCRIPTION                         | 1.9                                                  | 7.4                                                  | 4                        | 11                 |
| 1QO0           | BINDING PROTEIN                       | 1.1                                                  | 2.1                                                  | 2                        | 16                 |
| 1QO0           | BINDING PROTEIN                       | 1.8                                                  | 3.5                                                  | 2                        | 17                 |
| 1QS7           | METAL BINDING PROTEIN/PEPTIDE         | 1.4                                                  | 2.8                                                  | 2                        | 16                 |
| 1QS7           | METAL BINDING PROTEIN/PEPTIDE         | 1.8                                                  | 3.5                                                  | 2                        | 10                 |
| 1QS7           | METAL BINDING PROTEIN/PEPTIDE         | 1.9                                                  | 11.4                                                 | 6                        | 14                 |
| 1QTY           | HORMONE/GROWTH FACTOR RECEPTOR        | 1.7                                                  | 3.3                                                  | 2                        | 9                  |
| 1QTY           | HORMONE/GROWTH FACTOR RECEPTOR        | 1.8                                                  | 3.5                                                  | 2                        | 9                  |
| 1RON           | TRANSCRIPTION/DNA                     | 1.3                                                  | 2.5                                                  | 2                        | 5                  |
| 1R1K           | HORMONE/GROWTH FACTOR RECEPTOR        | 1.6                                                  | 4.8                                                  | 3                        | 22                 |
| 1R1K           | HORMONE/GROWTH FACTOR RECEPTOR        | 1.7                                                  | 3.4                                                  | 2                        | 30                 |
| 1R4M           | CELL CYCLE                            | 1.3                                                  | 2.6                                                  | 2                        | 11                 |
| 1R4M           | CELL CYCLE                            | 1.4                                                  | 2.7                                                  | 2                        | 21                 |
| 1R4M           | CELL CYCLE                            | 1.5                                                  | 2.9                                                  | 2                        | 13                 |
| 1R4M           | CELL CYCLE                            | 1.3                                                  | 2.5                                                  | 2                        | 11                 |
| 1R4M           | CELL CYCLE                            | 1.7                                                  | 5.2                                                  | 3                        | 21                 |
| 1R4M           | CELL CYCLE                            | 1.7                                                  | 5.1                                                  | 3                        | 21                 |
| 1R4M           | CELL CYCLE                            | 1.2                                                  | 3.6                                                  | 3                        | 11                 |
| 1R4M           | CELL CYCLE                            | 1.7                                                  | 6.7                                                  | 4                        | 21                 |
| 1R4M           | CELL CYCLE                            | 1.3                                                  | 2.5                                                  | 2                        | 15                 |
| 1R4M           | CELL CYCLE                            | 1.4                                                  | 2.7                                                  | 2                        | 11                 |
| 1R4M           | CELL CYCLE                            | 1.7                                                  | 5.0                                                  | 3                        | 21                 |
| 1R4M           | CELL CYCLE                            | 1.6                                                  | 7.8                                                  | 5                        | 21                 |
| 1R4M           | CELL CYCLE                            | 1.4                                                  | 2.8                                                  | 2                        | 15                 |
| 1R60           | HYDROLASE                             | 1.6                                                  | 3.1                                                  | 2                        | 17                 |
| 1R60           | HYDROLASE                             | 1.3                                                  | 6.6                                                  | 5                        | 18                 |
| 1R60           | HYDROLASE                             | 1.1                                                  | 2.2                                                  | 2                        | 17                 |
| 1R60           | HYDROLASE                             | 1.3                                                  | 3.8                                                  | 3                        | 15                 |
| 1R60           | HYDROLASE                             | 1.8                                                  | 7.3                                                  | 4                        | 18                 |
| 1R8Q           | PROTEIN TRANSPORT/EXCHANGE FACTOR     | 1.7                                                  | 10.0                                                 | 6                        | 19                 |
| 1R8Q           | PROTEIN TRANSPORT/EXCHANGE FACTOR     | 1.5                                                  | 2.9                                                  | 2                        | 14                 |
| 1R8U           | TRANSCRIPTION/TRANSCRIPTION ACTIVATOR | 1.8                                                  | 10.7                                                 | 6                        | 27                 |
| 1R8U           | TRANSCRIPTION/TRANSCRIPTION ACTIVATOR | 1.3                                                  | 2.6                                                  | 2                        | 16                 |
| 1RDT           | HORMONE/GROWTH FACTOR                 | 1.9                                                  | 3.8                                                  | 2                        | 23                 |
| 1RDT           | HORMONE/GROWTH FACTOR                 | 1.5                                                  | 4.4                                                  | 3                        | 29                 |
| 1RDT           | HORMONE/GROWTH FACTOR                 | 1.1                                                  | 2.1                                                  | 2                        | 23                 |
| 1RE0           | PROTEIN TRANSPORT                     | 1.6                                                  | 4.9                                                  | 3                        | 6                  |
| 1RE0           | PROTEIN TRANSPORT                     | 1.6                                                  | 6.5                                                  | 4                        | 19                 |
| 1RH5           | PROTEIN TRANSPORT                     | 1.2                                                  | 2.4                                                  | 2                        | 34                 |
| 1RH5           | PROTEIN TRANSPORT                     | 1.9                                                  | 3.8                                                  | 2                        | 17                 |
| 1RH5           | PROTEIN TRANSPORT                     | 1.5                                                  | 4.5                                                  | 3                        | 19                 |
| 1RH5           | PROTEIN TRANSPORT                     | 1.4                                                  | 8.2                                                  | 6                        | 37                 |
| 1RH5           | PROTEIN TRANSPORT                     | 1.4                                                  | 4.1                                                  | 3                        | 13                 |
| 1RH5           | PROTEIN TRANSPORT                     | 1.9                                                  | 5.8                                                  | 3                        | 20                 |
| 1RIW           | HYDROLASE/BLOOD CLOTTING              | 1.6                                                  | 3.1                                                  | 2                        | 8                  |
| 1RK8           | TRANSLATION                           | 1.5                                                  | 4.6                                                  | 3                        | 15                 |
| 1RKE           | CELL ADHESION, STRUCTURAL PROTEIN     | 1.6                                                  | 4.9                                                  | 3                        | 28                 |
| 1RKE           | CELL ADHESION, STRUCTURAL PROTEIN     | 1.7                                                  | 5.0                                                  | 3                        | 20                 |
| 1RKE           | CELL ADHESION, STRUCTURAL PROTEIN     | 1.4                                                  | 2.8                                                  | 2                        | 28                 |
| 1RM1           | TRANSCRIPTION/DNA                     | 1.9                                                  | 9.3                                                  | 5                        | 18                 |
| 1RM1           | TRANSCRIPTION/DNA                     | 1.8                                                  | 3.6                                                  | 2                        | 19                 |

TABLE S4

Jochim, et al

| A. PDB<br>CODE | J. HELIX START<br>RESIDUE # | K. HELIX END<br>RESIDUE # |
|----------------|-----------------------------|---------------------------|
| 1P4Q           | 171                         | 184                       |
| 1P8V           | 20                          | 27                        |
| 1P9M           | 27                          | 44                        |
| 1PCQ           | 230                         | 242                       |
| 1PD7           | 5                           | 21                        |
| 1PD7           | 202                         | 221                       |
| 1PGR           | 12                          | 40                        |
| 1PK1           | 66                          | 79                        |
| 1PQ1           | 119                         | 131                       |
| 1PSB           | 50                          | 61                        |
| 1PSB           | 72                          | 87                        |
| 1PSB           | 72                          | 87                        |
| 1PZL           | 204                         | 214                       |
| 1QO0           | 151                         | 166                       |
| 1QO0           | 151                         | 167                       |
| 1QS7           | 78                          | 93                        |
| 1QS7           | 65                          | 74                        |
| 1QS7           | 6                           | 19                        |
| 1QTY           | 17                          | 25                        |
| 1QTY           | 17                          | 25                        |
| 1RON           | 247                         | 251                       |
| 1R1K           | 385                         | 406                       |
| 1R1K           | 481                         | 510                       |
| 1R4M           | 476                         | 486                       |
| 1R4M           | 293                         | 313                       |
| 1R4M           | 123                         | 135                       |
| 1R4M           | 476                         | 486                       |
| 1R4M           | 491                         | 511                       |
| 1R4M           | 293                         | 313                       |
| 1R4M           | 476                         | 486                       |
| 1R4M           | 293                         | 313                       |
| 1R4M           | 148                         | 162                       |
| 1R4M           | 476                         | 486                       |
| 1R4M           | 491                         | 511                       |
| 1R4M           | 293                         | 313                       |
| 1R4M           | 148                         | 162                       |
| 1R6O           | 82                          | 98                        |
| 1R6O           | 78                          | 95                        |
| 1R6O           | 4                           | 20                        |
| 1R6O           | 55                          | 69                        |
| 1R6O           | 78                          | 95                        |
| 1R8Q           | 182                         | 200                       |
| 1R8Q           | 228                         | 241                       |
| 1R8U           | 348                         | 374                       |
| 1R8U           | 382                         | 397                       |
| 1RDT           | 386                         | 408                       |
| 1RDT           | 431                         | 459                       |
| 1RDT           | 403                         | 425                       |
| 1RE0           | 78                          | 83                        |
| 1RE0           | 248                         | 266                       |
| 1RH5           | 363                         | 396                       |
| 1RH5           | 169                         | 185                       |
| 1RH5           | 402                         | 420                       |
| 1RH5           | 30                          | 66                        |
| 1RH5           | 12                          | 24                        |
| 1RH5           | 30                          | 49                        |
| 1RIW           | 159                         | 166                       |
| 1RK8           | 55                          | 69                        |
| 1RKE           | 7                           | 34                        |
| 1RKE           | 986                         | 1005                      |
| 1RKE           | 944                         | 971                       |
| 1RM1           | 4                           | 21                        |
| 1RM1           | 32                          | 50                        |

| A. PDB<br>CODE | L. HELIX SEQUENCE                     |
|----------------|---------------------------------------|
| 1P4Q           | CASSRQIISHWKNC                        |
| 1P8V           | ERELLESY                              |
| 1P9M           | KQIRYILDGIALRKETC                     |
| 1PCQ           | IREMLPVLEAVAK                         |
| 1PD7           | VEFNNAISYVVKIKTRF                     |
| 1PD7           | IQMLLEAADYLERREREAEH                  |
| 1PGR           | QSFLKCLEQVRKIQGDGAALQEKLCAATY         |
| 1PK1           | LGPALKICNLVNVK                        |
| 1PQ1           | AYQSFEQVVNELF                         |
| 1PSB           | QEVVDKVMETLD                          |
| 1PSB           | KETEFRLRLKRTRLGLE                     |
| 1PSB           | KETEFRLRLKRTRLGLE                     |
| 1PZL           | LDDQVALLRAH                           |
| 1QO0           | IYPRESNHVMRHLYRQ                      |
| 1QO0           | IYPRESNHVMRHLYRQH                     |
| 1QS7           | DTDSEELKEAFRVFD                       |
| 1QS7           | FPEFLNLMAR                            |
| 1QS7           | KTGHAVRAIGRLSS                        |
| 1QTY           | FMDVYQRSY                             |
| 1QTY           | FMDVYQRSY                             |
| 1RON           | MYMRR                                 |
| 1R1K           | RQEVEVLREKMFLCLDEYCRRS                |
| 1R1K           | PRCAVIFGKILGILTEIRTLGMQNSNMCIS        |
| 1R4M           | DDYVHEFCRYG                           |
| 1R4M           | ASTNAVIAAVCATEVFKIATS                 |
| 1R4M           | VERIKERVEEKEG                         |
| 1R4M           | DDYVHEFCRYG                           |
| 1R4M           | HTIAAFLGGAAAQEVKIITK                  |
| 1R4M           | ASTNAVIAAVCATEVFKIATS                 |
| 1R4M           | DDYVHEFCRYG                           |
| 1R4M           | ASTNAVIAAVCATEVFKIATS                 |
| 1R4M           | IIARRWINGMLISLL                       |
| 1R4M           | DDYVHEFCRYG                           |
| 1R4M           | HTIAAFLGGAAAQEVKIITK                  |
| 1R4M           | ASTNAVIAAVCATEVFKIATS                 |
| 1R4M           | IIARRWINGMLISLL                       |
| 1R60           | LSFQRVLQRAVHVQSS                      |
| 1R60           | AEVAETKVAMVNKYAREN                    |
| 1R60           | QELELSLNMAFARAREH                     |
| 1R60           | VERATQLMLAVHYQG                       |
| 1R60           | AEVAETKVAMVNKYAREN                    |
| 1R8Q           | TDTCYVLSYSVIMLNTDLH                   |
| 1R8Q           | EELLRNLYDSIRNE                        |
| 1R8U           | EKRKLIQQQLVLLLHAHKQRREQANG            |
| 1R8U           | PHCRTMKNVNLNMTHC                      |
| 1RDT           | PAEVEALREKVYASLEAYCKHKY               |
| 1RDT           | LFAKLLQKMTDLRQIVTEHVQLLQVIKKT         |
| 1RDT           | VKPIEDIQDNLLQALELQLKLNH               |
| 1RE0           | WRHYFQ                                |
| 1RE0           | ADSVFVLSYSIIMLNTDSH                   |
| 1RH5           | EKAIEHRLKRYIPPLTMSSAFVGFATIANFIG      |
| 1RH5           | GIGLFIAAGVSQTIFVG                     |
| 1RH5           | TGVLLTVSIVYRMYEQLLR                   |
| 1RH5           | KDEYLAVAKVTALGISLLGIIGYIIHVPATYIKGILK |
| 1RH5           | KEFIEECRRVWL                          |
| 1RH5           | PEHVIGVTAVFVIIAILTY                   |
| 1RIW           | RETAASLL                              |
| 1RK8           | QSVMEELKRIIIDSE                       |
| 1RKE           | RTIESILEPVAQQISHLVIMHEEGEVDG          |
| 1RKE           | ERIPITISTQLKILSTVKATM                 |
| 1RKE           | KRALIQCAKDIASDEVTRLAKEVAKQ            |
| 1RM1           | AEASRVYEIIVESVVNEV                    |
| 1RM1           | EQTLQDLKNIWQKKTETK                    |

TABLE S4

Jochim, et al

| A. PDB<br>CODE | M. RESOLUTION |
|----------------|---------------|
| 1P4Q           | NOT APP       |
| 1P8V           | 2.6           |
| 1P9M           | 3.65          |
| 1PCQ           | 2.81          |
| 1PD7           | NOT APP       |
| 1PD7           | NOT APP       |
| 1PGR           | 3.5           |
| 1PK1           | 1.8           |
| 1PQ1           | 1.65          |
| 1PSB           | NOT APP       |
| 1PSB           | NOT APP       |
| 1PSB           | NOT APP       |
| 1PZL           | 2.1           |
| 1QO0           | 2.25          |
| 1QO0           | 2.25          |
| 1QS7           | 1.8           |
| 1QS7           | 1.8           |
| 1QS7           | 1.8           |
| 1QTY           | 2.7           |
| 1QTY           | 2.7           |
| 1RON           | 2.6           |
| 1R1K           | 2.9           |
| 1R1K           | 2.9           |
| 1R4M           | 3             |
| 1R4M           | 3             |
| 1R4M           | 3             |
| 1R4M           | 3             |
| 1R4M           | 3             |
| 1R4M           | 3             |
| 1R4M           | 3             |
| 1R4M           | 3             |
| 1R4M           | 3             |
| 1R4M           | 3             |
| 1R4M           | 3             |
| 1R4M           | 3             |
| 1R4M           | 3             |
| 1R4M           | 3             |
| 1R4M           | 3             |
| 1R4M           | 3             |
| 1R6O           | 2.25          |
| 1R6O           | 2.25          |
| 1R6O           | 2.25          |
| 1R6O           | 2.25          |
| 1R6O           | 2.25          |
| 1R8Q           | 1.86          |
| 1R8Q           | 1.86          |
| 1R8U           | NOT APP       |
| 1R8U           | NOT APP       |
| 1RDT           | 2.4           |
| 1RDT           | 2.4           |
| 1RDT           | 2.4           |
| 1RE0           | 2.4           |
| 1RE0           | 2.4           |
| 1RH5           | 3.2           |
| 1RH5           | 3.2           |
| 1RH5           | 3.2           |
| 1RH5           | 3.2           |
| 1RH5           | 3.2           |
| 1RH5           | 3.2           |
| 1RIW           | 2.04          |
| 1RK8           | 1.9           |
| 1RKE           | 2.35          |
| 1RKE           | 2.35          |
| 1RKE           | 2.35          |
| 1RM1           | 2.5           |
| 1RM1           | 2.5           |

| A. PDB CODE | B. INTERFACE CHAINS | C. CHAIN | D. TITLE                                                                                |
|-------------|---------------------|----------|-----------------------------------------------------------------------------------------|
| IRM1        | B C                 | C        | STRUCTURE OF A YEAST TFIIIA/TBP/TATA-BOX DNA COMPLEX                                    |
| IRP3        | A B                 | A        | COCRYSTAL STRUCTURE OF THE FLAGELLAR SIGMA/ANTI-SIGMA COMPLEX, SIGMA-28/FLGM            |
| IRP3        | A B                 | A        | COCRYSTAL STRUCTURE OF THE FLAGELLAR SIGMA/ANTI-SIGMA COMPLEX, SIGMA-28/FLGM            |
| IRP3        | A B                 | A        | COCRYSTAL STRUCTURE OF THE FLAGELLAR SIGMA/ANTI-SIGMA COMPLEX, SIGMA-28/FLGM            |
| IRP3        | A B                 | A        | COCRYSTAL STRUCTURE OF THE FLAGELLAR SIGMA/ANTI-SIGMA COMPLEX, SIGMA-28/FLGM            |
| IRP3        | A B                 | A        | COCRYSTAL STRUCTURE OF THE FLAGELLAR SIGMA/ANTI-SIGMA COMPLEX, SIGMA-28/FLGM            |
| IRP3        | A B                 | B        | COCRYSTAL STRUCTURE OF THE FLAGELLAR SIGMA/ANTI-SIGMA COMPLEX, SIGMA-28/FLGM            |
| IRP3        | A B                 | B        | COCRYSTAL STRUCTURE OF THE FLAGELLAR SIGMA/ANTI-SIGMA COMPLEX, SIGMA-28/FLGM            |
| IRP3        | C D                 | C        | COCRYSTAL STRUCTURE OF THE FLAGELLAR SIGMA/ANTI-SIGMA COMPLEX, SIGMA-28/FLGM            |
| IRP3        | C D                 | C        | COCRYSTAL STRUCTURE OF THE FLAGELLAR SIGMA/ANTI-SIGMA COMPLEX, SIGMA-28/FLGM            |
| IRP3        | C D                 | D        | COCRYSTAL STRUCTURE OF THE FLAGELLAR SIGMA/ANTI-SIGMA COMPLEX, SIGMA-28/FLGM            |
| IRP3        | C D                 | D        | COCRYSTAL STRUCTURE OF THE FLAGELLAR SIGMA/ANTI-SIGMA COMPLEX, SIGMA-28/FLGM            |
| IRP3        | C D                 | D        | COCRYSTAL STRUCTURE OF THE FLAGELLAR SIGMA/ANTI-SIGMA COMPLEX, SIGMA-28/FLGM            |
| IRP3        | E F                 | E        | COCRYSTAL STRUCTURE OF THE FLAGELLAR SIGMA/ANTI-SIGMA COMPLEX, SIGMA-28/FLGM            |
| IRP3        | E F                 | F        | COCRYSTAL STRUCTURE OF THE FLAGELLAR SIGMA/ANTI-SIGMA COMPLEX, SIGMA-28/FLGM            |
| IRP3        | E F                 | F        | COCRYSTAL STRUCTURE OF THE FLAGELLAR SIGMA/ANTI-SIGMA COMPLEX, SIGMA-28/FLGM            |
| IRP3        | E F                 | F        | COCRYSTAL STRUCTURE OF THE FLAGELLAR SIGMA/ANTI-SIGMA COMPLEX, SIGMA-28/FLGM            |
| IRP3        | G H                 | G        | COCRYSTAL STRUCTURE OF THE FLAGELLAR SIGMA/ANTI-SIGMA COMPLEX, SIGMA-28/FLGM            |
| IRP3        | G H                 | G        | COCRYSTAL STRUCTURE OF THE FLAGELLAR SIGMA/ANTI-SIGMA COMPLEX, SIGMA-28/FLGM            |
| IRP3        | G H                 | G        | COCRYSTAL STRUCTURE OF THE FLAGELLAR SIGMA/ANTI-SIGMA COMPLEX, SIGMA-28/FLGM            |
| IRP3        | G H                 | H        | COCRYSTAL STRUCTURE OF THE FLAGELLAR SIGMA/ANTI-SIGMA COMPLEX, SIGMA-28/FLGM            |
| IRSO        | C D                 | C        | HETERO-TETRAMERIC L27 (LIN-2, LIN-7) DOMAIN COMPLEXES AS ORGANIZATION PLATFORMS OF SUPR |
| IRSO        | C D                 | C        | HETERO-TETRAMERIC L27 (LIN-2, LIN-7) DOMAIN COMPLEXES AS ORGANIZATION PLATFORMS OF SUPR |
| IRSO        | C D                 | D        | HETERO-TETRAMERIC L27 (LIN-2, LIN-7) DOMAIN COMPLEXES AS ORGANIZATION PLATFORMS OF SUPR |
| IRTD        | A B                 | B        | STRUCTURE OF A CATALYTIC COMPLEX OF HIV-1 REVERSE TRANSCRIPTASE: IMPLICATIONS FOR NUCLI |
| IRY1        | C D                 | C        | STRUCTURE OF THE SIGNAL RECOGNITION PARTICLE INTERACTING WITH THE ELONGATION-ARRESTE    |
| IRZR        | A D                 | D        | CRYSTAL STRUCTURE OF TRANSCRIPTIONAL REGULATOR- PHOSPHOPROTEIN-DNA COMPLEX              |
| IS1C        | A X                 | X        | CRYSTAL STRUCTURE OF THE COMPLEX BETWEEN THE HUMAN RHOA AND RHO-BINDING DOMAIN OF       |
| IS1C        | A Y                 | Y        | CRYSTAL STRUCTURE OF THE COMPLEX BETWEEN THE HUMAN RHOA AND RHO-BINDING DOMAIN OF       |
| IS5E        | A G                 | G        | CHOLERA HOLOTOXIN, CRYSTAL FORM 1                                                       |
| IS5E        | B K                 | K        | CHOLERA HOLOTOXIN, CRYSTAL FORM 1                                                       |
| IS5E        | B L                 | L        | CHOLERA HOLOTOXIN, CRYSTAL FORM 1                                                       |
| IS5R        | A B                 | A        | SOLUTION STRUCTURE OF HBP1 SID-MSIN3A PAH2 COMPLEX                                      |
| IS5R        | A B                 | B        | SOLUTION STRUCTURE OF HBP1 SID-MSIN3A PAH2 COMPLEX                                      |
| IS9K        | D E                 | D        | CRYSTAL STRUCTURE OF HUMAN NFAT1 AND FOS-JUN ON THE IL-2 ARRE1 SITE                     |
| IS9K        | D E                 | E        | CRYSTAL STRUCTURE OF HUMAN NFAT1 AND FOS-JUN ON THE IL-2 ARRE1 SITE                     |
| ISA0        | C D                 | D        | TUBULIN-COLCHICINE: STATHMIN-LIKE DOMAIN COMPLEX                                        |
| ISB0        | A B                 | A        | SOLUTION STRUCTURE OF THE KIX DOMAIN OF CBP BOUND TO THE TRANSACTIVATION DOMAIN OF C    |
| ISFC        | A B                 | A        | NEURONAL SYNAPTIC FUSION COMPLEX                                                        |
| ISFC        | A B                 | B        | NEURONAL SYNAPTIC FUSION COMPLEX                                                        |
| ISFC        | A D                 | A        | NEURONAL SYNAPTIC FUSION COMPLEX                                                        |
| ISFC        | A D                 | D        | NEURONAL SYNAPTIC FUSION COMPLEX                                                        |
| ISFC        | B C                 | B        | NEURONAL SYNAPTIC FUSION COMPLEX                                                        |
| ISFC        | B C                 | C        | NEURONAL SYNAPTIC FUSION COMPLEX                                                        |
| ISFC        | C D                 | C        | NEURONAL SYNAPTIC FUSION COMPLEX                                                        |
| ISFC        | E C                 | E        | NEURONAL SYNAPTIC FUSION COMPLEX                                                        |
| ISFC        | E F                 | E        | NEURONAL SYNAPTIC FUSION COMPLEX                                                        |
| ISFC        | E F                 | F        | NEURONAL SYNAPTIC FUSION COMPLEX                                                        |
| ISFC        | E H                 | E        | NEURONAL SYNAPTIC FUSION COMPLEX                                                        |
| ISFC        | E H                 | H        | NEURONAL SYNAPTIC FUSION COMPLEX                                                        |
| ISFC        | G H                 | G        | NEURONAL SYNAPTIC FUSION COMPLEX                                                        |
| ISFC        | G H                 | H        | NEURONAL SYNAPTIC FUSION COMPLEX                                                        |
| ISFC        | I J                 | J        | NEURONAL SYNAPTIC FUSION COMPLEX                                                        |
| ISFC        | J K                 | J        | NEURONAL SYNAPTIC FUSION COMPLEX                                                        |
| ISFC        | J K                 | K        | NEURONAL SYNAPTIC FUSION COMPLEX                                                        |
| ISFC        | J K                 | K        | NEURONAL SYNAPTIC FUSION COMPLEX                                                        |
| ISFC        | K L                 | K        | NEURONAL SYNAPTIC FUSION COMPLEX                                                        |
| ISFC        | K L                 | L        | NEURONAL SYNAPTIC FUSION COMPLEX                                                        |
| ISHZ        | A F                 | F        | CRYSTAL STRUCTURE OF THE P115RHOGEF RGRGS DOMAIN IN A COMPLEX WITH GALPHA(13):GALPHA(   |
| ISHZ        | D C                 | D        | CRYSTAL STRUCTURE OF THE P115RHOGEF RGRGS DOMAIN IN A COMPLEX WITH GALPHA(13):GALPHA(   |
| ISQ0        | A B                 | A        | CRYSTAL STRUCTURE OF THE COMPLEX OF THE WILD-TYPE VON WILLEBRAND FACTOR A1 DOMAIN AN    |
| ISQK        | A B                 | B        | CRYSTAL STRUCTURE OF CIBOULOT IN COMPLEX WITH SKELETAL ACTIN                            |

TABLE S4

Jochim, et al

| A. PDB<br>CODE | E. FUNCTION                         | F. $\Delta\Delta G_{\text{AVG,HELIX}}$<br>(KCAL/MOL) | G. $\Delta\Delta G_{\text{SUM,HELIX}}$<br>(KCAL/MOL) | H. # HOTSPOT<br>RESIDUES | I. HELIX<br>LENGTH |
|----------------|-------------------------------------|------------------------------------------------------|------------------------------------------------------|--------------------------|--------------------|
| 1RM1           | TRANSCRIPTION/DNA                   | 1.7                                                  | 3.3                                                  | 2                        | 7                  |
| 1RP3           | TRANSCRIPTION                       | 1.9                                                  | 7.6                                                  | 4                        | 14                 |
| 1RP3           | TRANSCRIPTION                       | 1.5                                                  | 3.0                                                  | 2                        | 18                 |
| 1RP3           | TRANSCRIPTION                       | 1.8                                                  | 3.6                                                  | 2                        | 14                 |
| 1RP3           | TRANSCRIPTION                       | 1.4                                                  | 4.2                                                  | 3                        | 21                 |
| 1RP3           | TRANSCRIPTION                       | 1.5                                                  | 4.6                                                  | 3                        | 15                 |
| 1RP3           | TRANSCRIPTION                       | 1.5                                                  | 3.0                                                  | 2                        | 11                 |
| 1RP3           | TRANSCRIPTION                       | 1.6                                                  | 4.7                                                  | 3                        | 16                 |
| 1RP3           | TRANSCRIPTION                       | 1.4                                                  | 4.1                                                  | 3                        | 18                 |
| 1RP3           | TRANSCRIPTION                       | 1.7                                                  | 3.4                                                  | 2                        | 27                 |
| 1RP3           | TRANSCRIPTION                       | 1.1                                                  | 2.2                                                  | 2                        | 20                 |
| 1RP3           | TRANSCRIPTION                       | 1.6                                                  | 3.1                                                  | 2                        | 13                 |
| 1RP3           | TRANSCRIPTION                       | 1.7                                                  | 3.3                                                  | 2                        | 15                 |
| 1RP3           | TRANSCRIPTION                       | 1.4                                                  | 4.2                                                  | 3                        | 19                 |
| 1RP3           | TRANSCRIPTION                       | 1.6                                                  | 3.1                                                  | 2                        | 17                 |
| 1RP3           | TRANSCRIPTION                       | 1.6                                                  | 3.2                                                  | 2                        | 13                 |
| 1RP3           | TRANSCRIPTION                       | 1.6                                                  | 3.2                                                  | 2                        | 12                 |
| 1RP3           | TRANSCRIPTION                       | 1.5                                                  | 2.9                                                  | 2                        | 14                 |
| 1RP3           | TRANSCRIPTION                       | 1.3                                                  | 5.3                                                  | 4                        | 18                 |
| 1RP3           | TRANSCRIPTION                       | 1.9                                                  | 9.5                                                  | 5                        | 14                 |
| 1RP3           | TRANSCRIPTION                       | 1.7                                                  | 3.4                                                  | 2                        | 18                 |
| 1RP3           | TRANSCRIPTION                       | 1.9                                                  | 3.7                                                  | 2                        | 10                 |
| 1RSO           | NEUROPEPTIDE/MEMBRANE PROTEIN       | 1.6                                                  | 3.2                                                  | 2                        | 12                 |
| 1RSO           | NEUROPEPTIDE/MEMBRANE PROTEIN       | 1.4                                                  | 2.7                                                  | 2                        | 15                 |
| 1RSO           | NEUROPEPTIDE/MEMBRANE PROTEIN       | 1.5                                                  | 7.5                                                  | 5                        | 17                 |
| 1RTD           | TRANSFERASE/DNA                     | 1.6                                                  | 3.1                                                  | 2                        | 7                  |
| 1RY1           | TRANSLATION                         | 1.4                                                  | 4.2                                                  | 3                        | 17                 |
| 1RZR           | TRANSCRIPTION/TRANSPORT PROTEIN/DNA | 1.6                                                  | 4.7                                                  | 3                        | 15                 |
| 1S1C           | SIGNALING PROTEIN                   | 1.5                                                  | 3.0                                                  | 2                        | 30                 |
| 1S1C           | SIGNALING PROTEIN                   | 1.2                                                  | 2.3                                                  | 2                        | 21                 |
| 1S5E           | TRANSEFERASE,TOXIN                  | 1.8                                                  | 3.6                                                  | 2                        | 20                 |
| 1S5E           | TRANSEFERASE,TOXIN                  | 1.2                                                  | 2.3                                                  | 2                        | 20                 |
| 1S5E           | TRANSEFERASE,TOXIN                  | 1.6                                                  | 3.1                                                  | 2                        | 20                 |
| 1S5R           | TRANSCRIPTION                       | 1.3                                                  | 5.3                                                  | 4                        | 12                 |
| 1S5R           | TRANSCRIPTION                       | 1.5                                                  | 4.5                                                  | 3                        | 17                 |
| 1S9K           | TRANSCRIPTION/DNA                   | 1.4                                                  | 7.1                                                  | 5                        | 51                 |
| 1S9K           | TRANSCRIPTION/DNA                   | 1.7                                                  | 8.5                                                  | 5                        | 48                 |
| 1SA0           | CELL CYCLE                          | 1.5                                                  | 2.9                                                  | 2                        | 8                  |
| 1SB0           | TRANSCRIPTION                       | 1.3                                                  | 2.6                                                  | 2                        | 16                 |
| 1SFC           | TRANSPORT PROTEIN                   | 1.5                                                  | 13.1                                                 | 9                        | 63                 |
| 1SFC           | TRANSPORT PROTEIN                   | 1.7                                                  | 14.9                                                 | 9                        | 68                 |
| 1SFC           | TRANSPORT PROTEIN                   | 1.4                                                  | 8.2                                                  | 6                        | 63                 |
| 1SFC           | TRANSPORT PROTEIN                   | 1.5                                                  | 8.7                                                  | 6                        | 59                 |
| 1SFC           | TRANSPORT PROTEIN                   | 1.5                                                  | 13.5                                                 | 9                        | 68                 |
| 1SFC           | TRANSPORT PROTEIN                   | 1.4                                                  | 10.1                                                 | 7                        | 73                 |
| 1SFC           | TRANSPORT PROTEIN                   | 1.4                                                  | 9.6                                                  | 7                        | 73                 |
| 1SFC           | TRANSPORT PROTEIN                   | 1.6                                                  | 3.1                                                  | 2                        | 64                 |
| 1SFC           | TRANSPORT PROTEIN                   | 1.4                                                  | 11.5                                                 | 8                        | 64                 |
| 1SFC           | TRANSPORT PROTEIN                   | 1.6                                                  | 3.1                                                  | 2                        | 30                 |
| 1SFC           | TRANSPORT PROTEIN                   | 1.5                                                  | 9.2                                                  | 6                        | 64                 |
| 1SFC           | TRANSPORT PROTEIN                   | 1.5                                                  | 4.4                                                  | 3                        | 47                 |
| 1SFC           | TRANSPORT PROTEIN                   | 1.4                                                  | 6.9                                                  | 5                        | 45                 |
| 1SFC           | TRANSPORT PROTEIN                   | 1.7                                                  | 5.2                                                  | 3                        | 47                 |
| 1SFC           | TRANSPORT PROTEIN                   | 1.9                                                  | 11.1                                                 | 6                        | 65                 |
| 1SFC           | TRANSPORT PROTEIN                   | 1.7                                                  | 15.6                                                 | 9                        | 65                 |
| 1SFC           | TRANSPORT PROTEIN                   | 1.8                                                  | 3.5                                                  | 2                        | 13                 |
| 1SFC           | TRANSPORT PROTEIN                   | 1.5                                                  | 6.1                                                  | 4                        | 48                 |
| 1SFC           | TRANSPORT PROTEIN                   | 1.2                                                  | 3.6                                                  | 3                        | 13                 |
| 1SFC           | TRANSPORT PROTEIN                   | 1.4                                                  | 10.9                                                 | 8                        | 48                 |
| 1SHZ           | SIGNALING PROTEIN                   | 1.8                                                  | 5.3                                                  | 3                        | 19                 |
| 1SHZ           | SIGNALING PROTEIN                   | 1.1                                                  | 2.2                                                  | 2                        | 12                 |
| 1SQ0           | BLOOD CLOTTING                      | 1.3                                                  | 5.3                                                  | 4                        | 13                 |
| 1SQK           | STRUCTURAL PROTEIN/PROTEIN BINDING  | 1.8                                                  | 3.5                                                  | 2                        | 13                 |

TABLE S4

Jochim, et al

| A. PDB<br>CODE | J. HELIX START<br>RESIDUE # | K. HELIX END<br>RESIDUE # |
|----------------|-----------------------------|---------------------------|
| IRM1           | 22                          | 28                        |
| IRP3           | 187                         | 200                       |
| IRP3           | 39                          | 56                        |
| IRP3           | 19                          | 32                        |
| IRP3           | 164                         | 184                       |
| IRP3           | 4                           | 18                        |
| IRP3           | 5                           | 15                        |
| IRP3           | 32                          | 47                        |
| IRP3           | 39                          | 56                        |
| IRP3           | 126                         | 152                       |
| IRP3           | 165                         | 184                       |
| IRP3           | 36                          | 48                        |
| IRP3           | 4                           | 18                        |
| IRP3           | 51                          | 69                        |
| IRP3           | 39                          | 55                        |
| IRP3           | 5                           | 17                        |
| IRP3           | 36                          | 47                        |
| IRP3           | 56                          | 69                        |
| IRP3           | 167                         | 184                       |
| IRP3           | 187                         | 200                       |
| IRP3           | 39                          | 56                        |
| IRP3           | 38                          | 47                        |
| IRSO           | 47                          | 58                        |
| IRSO           | 31                          | 45                        |
| IRSO           | 120                         | 136                       |
| IRTD           | 395                         | 401                       |
| IRY1           | 59                          | 75                        |
| IRZR           | 73                          | 87                        |
| IS1C           | 983                         | 1012                      |
| IS1C           | 991                         | 1011                      |
| IS5E           | 59                          | 78                        |
| IS5E           | 59                          | 78                        |
| IS5E           | 59                          | 78                        |
| IS5R           | 366                         | 377                       |
| IS5R           | 302                         | 318                       |
| IS9K           | 141                         | 191                       |
| IS9K           | 269                         | 316                       |
| ISA0           | 253                         | 260                       |
| ISB0           | 12                          | 27                        |
| ISFC           | 30                          | 92                        |
| ISFC           | 190                         | 257                       |
| ISFC           | 30                          | 92                        |
| ISFC           | 144                         | 202                       |
| ISFC           | 190                         | 257                       |
| ISFC           | 10                          | 82                        |
| ISFC           | 10                          | 82                        |
| ISFC           | 32                          | 95                        |
| ISFC           | 32                          | 95                        |
| ISFC           | 232                         | 261                       |
| ISFC           | 32                          | 95                        |
| ISFC           | 157                         | 203                       |
| ISFC           | 38                          | 82                        |
| ISFC           | 157                         | 203                       |
| ISFC           | 194                         | 258                       |
| ISFC           | 194                         | 258                       |
| ISFC           | 22                          | 34                        |
| ISFC           | 35                          | 82                        |
| ISFC           | 22                          | 34                        |
| ISFC           | 35                          | 82                        |
| ISHZ           | 145                         | 163                       |
| ISHZ           | 113                         | 124                       |
| ISQ0           | 594                         | 606                       |
| ISQK           | 12                          | 24                        |



| A. PDB<br>CODE | L. HELIX SEQUENCE                                                          |
|----------------|----------------------------------------------------------------------------|
| IRM1           | REDFENA                                                                    |
| 1RP3           | EREKLVIFLYEE                                                               |
| 1RP3           | IRDLISYGVIGLIKAVDN                                                         |
| 1RP3           | LPLVKAIATNIKKH                                                             |
| 1RP3           | NVEEEVIKRELTEKVKEAVSK                                                      |
| 1RP3           | PYSNQIEREELILKY                                                            |
| 1RP3           | IELSRLIGLLL                                                                |
| 1RP3           | KIEDKVTLSKIAQELS                                                           |
| 1RP3           | IRDLISYGVIGLIKAVDN                                                         |
| 1RP3           | TEELFKTLDFKINFSYILSLEEVFRDFA                                               |
| 1RP3           | VEEEVIKRELTEKVKEAVSK                                                       |
| 1RP3           | KVTLISKIAQELSK                                                             |
| 1RP3           | RIELSRLIGLLETE                                                             |
| 1RP3           | VEEKDLEKKVKELKEKIEK                                                        |
| 1RP3           | IRDLISYGVIGLIKAVD                                                          |
| 1RP3           | IELSRLIGLLETT                                                              |
| 1RP3           | KVTLISKIAQELS                                                              |
| 1RP3           | LEKKVKELKEKIEK                                                             |
| 1RP3           | EEVIKRELTEKVKEAVSK                                                         |
| 1RP3           | EREKLVIFLYEE                                                               |
| 1RP3           | IRDLISYGVIGLIKAVDN                                                         |
| 1RP3           | TLISKIAQELS                                                                |
| 1RSO           | NLFQALIDIQEF                                                               |
| 1RSO           | RQLRSSIERVISIFQ                                                            |
| 1RSO           | QHLHTLLDLYDKINTKS                                                          |
| 1RTD           | KETWETW                                                                    |
| 1RY1           | VKKIEKFHSQMLRMLMVA                                                         |
| 1RZR           | IFYAELARGIEDIAT                                                            |
| 1S1C           | NLKAAFEKNINTERTLKTQAVNKLAEIMNR                                             |
| 1S1C           | NINTERTLKTQAVNKLAEIMN                                                      |
| 1S5E           | DSQKKAIERMKDTRLRIAYLT                                                      |
| 1S5E           | DSQKKAIERMKDTRLRIAYLT                                                      |
| 1S5E           | DSQKKAIERMKDTRLRIAYLT                                                      |
| 1S5R           | AVYVLSSMARQR                                                               |
| 1S5R           | VEFNHAINVYVNIKINRF                                                         |
| 1S9K           | RIRRERNKMAAAKCRNRRELDTLQAEQDEKESALQTEIANLLKEKE                             |
| 1S9K           | RMRNRIAASKCRKRKLERIARLEEKVKTLKAQNSELASTANMLREQVA                           |
| 1SA0           | RKLAVNMV                                                                   |
| 1SB0           | QDLRSHLVHKLVAIF                                                            |
| 1SFC           | RRLQQTQAQVDEVVDIMRVNVDKVLERDQKLSLDDRADALQAGASQFETSAAKLRKYWWKN              |
| 1SFC           | QALSEIETHSEIHKLENSIRELHDMFMDMAMLVESQGEMIDRIEYNVEHAVDYVERAVSDTKKAVKY        |
| 1SFC           | RRLQQTQAQVDEVVDIMRVNVDKVLERDQKLSLDDRADALQAGASQFETSAAKLRKYWWKN              |
| 1SFC           | NEMDENLEQVSGIIGNLRHMALDMGNEIDTQNRQIDRIMEKADSNKTRIDEANQRATKM                |
| 1SFC           | QALSEIETHSEIHKLENSIRELHDMFMDMAMLVESQGEMIDRIEYNVEHAVDYVERAVSDTKKAVKY        |
| 1SFC           | ELEEMQRRADQLADESLESTRMLQLVEESKDAGIRTLVMLDEQGEQLDRVEEGMNHNINQDMKEAEKNLKDGLG |
| 1SFC           | ELEEMQRRADQLADESLESTRMLQLVEESKDAGIRTLVMLDEQGEQLDRVEEGMNHNINQDMKEAEKNLKDGLG |
| 1SFC           | LQQTQAQVDEVVDIMRVNVDKVLERDQKLSLDDRADALQAGASQFETSAAKLRKYWWKNLKM             |
| 1SFC           | LQQTQAQVDEVVDIMRVNVDKVLERDQKLSLDDRADALQAGASQFETSAAKLRKYWWKNLKM             |
| 1SFC           | RIEYNVEHAVDYVERAVSDTKKAVKYQSKA                                             |
| 1SFC           | LQQTQAQVDEVVDIMRVNVDKVLERDQKLSLDDRADALQAGASQFETSAAKLRKYWWKNLKM             |
| 1SFC           | IGNLRHMALDMGNEIDTQNRQIDRIMEKADSNKTRIDEANQRATKML                            |
| 1SFC           | ESKDAGIRTLVMLDEQGEQLDRVEEGMNHNINQDMKEAEKNLKDGLG                            |
| 1SFC           | IGNLRHMALDMGNEIDTQNRQIDRIMEKADSNKTRIDEANQRATKML                            |
| 1SFC           | EIETHSEIHKLENSIRELHDMFMDMAMLVESQGEMIDRIEYNVEHAVDYVERAVSDTKKAVKYQ           |
| 1SFC           | EIETHSEIHKLENSIRELHDMFMDMAMLVESQGEMIDRIEYNVEHAVDYVERAVSDTKKAVKYQ           |
| 1SFC           | ADESLESTRMLQ                                                               |
| 1SFC           | LVEESKDAGIRTLVMLDEQGEQLDRVEEGMNHNINQDMKEAEKNLKDGLG                         |
| 1SFC           | ADESLESTRMLQ                                                               |
| 1SFC           | LVEESKDAGIRTLVMLDEQGEQLDRVEEGMNHNINQDMKEAEKNLKDGLG                         |
| 1SHZ           | SQQVAVGRQLEDFRSKRLM                                                        |
| 1SHZ           | NKNQLHGDKLMA                                                               |
| 1SQ0           | TSEVLKYTLFQIF                                                              |
| 1SQK           | PKVAENLKSQLEG                                                              |



TABLE S4

Jochim, et al

| A. PDB CODE | B. INTERFACE CHAINS | C. CHAIN | D. TITLE                                                                                |
|-------------|---------------------|----------|-----------------------------------------------------------------------------------------|
| 1SVF        | AB                  | A        | PARAMYXOVIRUS SV5 FUSION PROTEIN CORE                                                   |
| 1SVF        | CD                  | C        | PARAMYXOVIRUS SV5 FUSION PROTEIN CORE                                                   |
| 1SVX        | AB                  | B        | CRYSTAL STRUCTURE OF A DESIGNED SELECTED ANKYRIN REPEAT PROTEIN IN COMPLEX WITH THE M   |
| 1SYQ        | AB                  | A        | HUMAN VINCULIN HEAD DOMAIN VH1, RESIDUES 1-258, IN COMPLEX WITH HUMANTALIN'S VINCULIN I |
| 1SYQ        | AB                  | A        | HUMAN VINCULIN HEAD DOMAIN VH1, RESIDUES 1-258, IN COMPLEX WITH HUMANTALIN'S VINCULIN I |
| 1SYQ        | AB                  | A        | HUMAN VINCULIN HEAD DOMAIN VH1, RESIDUES 1-258, IN COMPLEX WITH HUMANTALIN'S VINCULIN I |
| 1TOF        | AC                  | A        | CRYSTAL STRUCTURE OF THE TNSA/TNSC(504-555) COMPLEX                                     |
| 1TOF        | AC                  | A        | CRYSTAL STRUCTURE OF THE TNSA/TNSC(504-555) COMPLEX                                     |
| 1TOF        | AC                  | C        | CRYSTAL STRUCTURE OF THE TNSA/TNSC(504-555) COMPLEX                                     |
| 1TOF        | BD                  | B        | CRYSTAL STRUCTURE OF THE TNSA/TNSC(504-555) COMPLEX                                     |
| 1TOF        | BD                  | D        | CRYSTAL STRUCTURE OF THE TNSA/TNSC(504-555) COMPLEX                                     |
| 1TOF        | BD                  | D        | CRYSTAL STRUCTURE OF THE TNSA/TNSC(504-555) COMPLEX                                     |
| 1T2K        | CD                  | C        | STRUCTURE OF THE DNA BINDING DOMAINS OF IRF3, ATF-2 AND JUN BOUND TO DNA                |
| 1T2K        | CD                  | D        | STRUCTURE OF THE DNA BINDING DOMAINS OF IRF3, ATF-2 AND JUN BOUND TO DNA                |
| 1TA3        | AB                  | A        | CRYSTAL STRUCTURE OF XYLANASE (GH10) IN COMPLEX WITH INHIBITOR (XIP)                    |
| 1TA3        | AB                  | A        | CRYSTAL STRUCTURE OF XYLANASE (GH10) IN COMPLEX WITH INHIBITOR (XIP)                    |
| 1TB6        | LH                  | L        | 2.5A CRYSTAL STRUCTURE OF THE ANTITHROMBIN-THROMBIN-HEPARIN TERNARY COMPLEX             |
| 1TCO        | AB                  | B        | TERNARY COMPLEX OF A CALCINEURIN A FRAGMENT, CALCINEURIN B, FKBP12 AND THE IMMUNOSUPI   |
| 1TCO        | AB                  | B        | TERNARY COMPLEX OF A CALCINEURIN A FRAGMENT, CALCINEURIN B, FKBP12 AND THE IMMUNOSUPI   |
| 1TFC        | AC                  | C        | CRYSTAL STRUCTURE OF THE LIGAND-BINDING DOMAIN OF THE ESTROGEN-RELATED RECEPTOR GAM     |
| 1TH1        | AC                  | A        | BETA-CATENIN IN COMPLEX WITH A PHOSPHORYLATED APC 20AA REPEAT FRAGMENT                  |
| 1TH1        | AC                  | A        | BETA-CATENIN IN COMPLEX WITH A PHOSPHORYLATED APC 20AA REPEAT FRAGMENT                  |
| 1TH1        | AC                  | A        | BETA-CATENIN IN COMPLEX WITH A PHOSPHORYLATED APC 20AA REPEAT FRAGMENT                  |
| 1TH1        | BD                  | B        | BETA-CATENIN IN COMPLEX WITH A PHOSPHORYLATED APC 20AA REPEAT FRAGMENT                  |
| 1TH1        | BD                  | B        | BETA-CATENIN IN COMPLEX WITH A PHOSPHORYLATED APC 20AA REPEAT FRAGMENT                  |
| 1TH1        | BD                  | B        | BETA-CATENIN IN COMPLEX WITH A PHOSPHORYLATED APC 20AA REPEAT FRAGMENT                  |
| 1TI2        | AB                  | A        | CRYSTAL STRUCTURE OF PYROGALLOL-PHLOROGLUCINOL TRANSYDROXYLASE FROM PELOBACTER          |
| 1TI2        | CD                  | C        | CRYSTAL STRUCTURE OF PYROGALLOL-PHLOROGLUCINOL TRANSYDROXYLASE FROM PELOBACTER          |
| 1TI2        | CD                  | D        | CRYSTAL STRUCTURE OF PYROGALLOL-PHLOROGLUCINOL TRANSYDROXYLASE FROM PELOBACTER          |
| 1TI2        | EF                  | E        | CRYSTAL STRUCTURE OF PYROGALLOL-PHLOROGLUCINOL TRANSYDROXYLASE FROM PELOBACTER          |
| 1TI2        | GH                  | G        | CRYSTAL STRUCTURE OF PYROGALLOL-PHLOROGLUCINOL TRANSYDROXYLASE FROM PELOBACTER          |
| 1TI2        | KL                  | K        | CRYSTAL STRUCTURE OF PYROGALLOL-PHLOROGLUCINOL TRANSYDROXYLASE FROM PELOBACTER          |
| 1TIL        | AB                  | A        | CRYSTAL STRUCTURES OF THE ADP AND ATP BOUND FORMS OF THE CRYSTAL STRUCTURES OF THE AI   |
| 1TIL        | AB                  | B        | CRYSTAL STRUCTURES OF THE ADP AND ATP BOUND FORMS OF THE CRYSTAL STRUCTURES OF THE AI   |
| 1TIL        | CD                  | D        | CRYSTAL STRUCTURES OF THE ADP AND ATP BOUND FORMS OF THE CRYSTAL STRUCTURES OF THE AI   |
| 1TN6        | AB                  | A        | PROTEIN FARNESYLTRANSFERASE COMPLEXED WITH A RAP2A PEPTIDE SUBSTRATE AND A FPP ANALOG   |
| 1TN6        | AB                  | A        | PROTEIN FARNESYLTRANSFERASE COMPLEXED WITH A RAP2A PEPTIDE SUBSTRATE AND A FPP ANALOG   |
| 1TOC        | CD                  | C        | STRUCTURE OF SERINE PROTEINASE                                                          |
| 1TQE        | PX                  | X        | MECHANISM OF RECRUITMENT OF CLASS II HISTONE DEACETYLASES BY MYOCYTE ENHANCER FACTO     |
| 1TQY        | AB                  | A        | THE ACTINORHODIN KETOSYNTHASE/CHAIN LENGTH FACTOR                                       |
| 1TQY        | AB                  | A        | THE ACTINORHODIN KETOSYNTHASE/CHAIN LENGTH FACTOR                                       |
| 1TQY        | AB                  | B        | THE ACTINORHODIN KETOSYNTHASE/CHAIN LENGTH FACTOR                                       |
| 1TQY        | AB                  | B        | THE ACTINORHODIN KETOSYNTHASE/CHAIN LENGTH FACTOR                                       |
| 1TQY        | CD                  | C        | THE ACTINORHODIN KETOSYNTHASE/CHAIN LENGTH FACTOR                                       |
| 1TQY        | GH                  | H        | THE ACTINORHODIN KETOSYNTHASE/CHAIN LENGTH FACTOR                                       |
| 1TU3        | AF                  | F        | CRYSTAL STRUCTURE OF RAB5 COMPLEX WITH RABAPTIN5 C-TERMINAL DOMAIN                      |
| 1TU3        | CH                  | H        | CRYSTAL STRUCTURE OF RAB5 COMPLEX WITH RABAPTIN5 C-TERMINAL DOMAIN                      |
| 1TU3        | DI                  | D        | CRYSTAL STRUCTURE OF RAB5 COMPLEX WITH RABAPTIN5 C-TERMINAL DOMAIN                      |
| 1TU3        | EJ                  | E        | CRYSTAL STRUCTURE OF RAB5 COMPLEX WITH RABAPTIN5 C-TERMINAL DOMAIN                      |
| 1TU3        | EJ                  | J        | CRYSTAL STRUCTURE OF RAB5 COMPLEX WITH RABAPTIN5 C-TERMINAL DOMAIN                      |
| 1TUE        | DE                  | D        | THE X-RAY STRUCTURE OF THE PAPILLOMAVIRUS HELICASE IN COMPLEX WITH ITS MOLECULAR MATC   |
| 1TUE        | DE                  | D        | THE X-RAY STRUCTURE OF THE PAPILLOMAVIRUS HELICASE IN COMPLEX WITH ITS MOLECULAR MATC   |
| 1TUE        | DE                  | E        | THE X-RAY STRUCTURE OF THE PAPILLOMAVIRUS HELICASE IN COMPLEX WITH ITS MOLECULAR MATC   |
| 1TUE        | FG                  | F        | THE X-RAY STRUCTURE OF THE PAPILLOMAVIRUS HELICASE IN COMPLEX WITH ITS MOLECULAR MATC   |
| 1TUE        | KL                  | K        | THE X-RAY STRUCTURE OF THE PAPILLOMAVIRUS HELICASE IN COMPLEX WITH ITS MOLECULAR MATC   |
| 1TX4        | AB                  | B        | RHO/RHOGAP/GDP(DOT)ALF4 COMPLEX                                                         |
| 1TY4        | AC                  | A        | CRYSTAL STRUCTURE OF A CED-9/EGL-1 COMPLEX                                              |
| 1TY4        | BD                  | B        | CRYSTAL STRUCTURE OF A CED-9/EGL-1 COMPLEX                                              |
| 1TYE        | EF                  | F        | STRUCTURAL BASIS FOR ALLOSTERY IN INTEGRINS AND BINDING OF LIGAND-MIMETIC THERAPEUTIC   |
| 1U0S        | YA                  | Y        | CHEMOTAXIS KINASE CHEA P2 DOMAIN IN COMPLEX WITH RESPONSE REGULATOR CHEY FROM THE TH    |
| 1U54        | AB                  | B        | CRYSTAL STRUCTURES OF THE PHOSPHORYLATED AND UNPHOSPHORYLATED KINASE DOMAINS OF TH      |
| 1U5T        | AB                  | B        | STRUCTURE OF THE ESCRT-II ENDOSOMAL TRAFFICKING COMPLEX                                 |
| 1U6G        | AC                  | C        | CRYSTAL STRUCTURE OF THE CAND1-CUL1-ROC1 COMPLEX                                        |

TABLE S4

Jochim, et al

| A. PDB<br>CODE | E. FUNCTION                             | F. $\Delta\Delta G_{\text{AVG,HELIX}}$<br>(KCAL/MOL) | G. $\Delta\Delta G_{\text{SUM,HELIX}}$<br>(KCAL/MOL) | H. # HOTSPOT<br>RESIDUES | I. HELIX<br>LENGTH |
|----------------|-----------------------------------------|------------------------------------------------------|------------------------------------------------------|--------------------------|--------------------|
| 1SVF           | VIRAL PROTEIN                           | 1.6                                                  | 3.2                                                  | 2                        | 61                 |
| 1SVF           | VIRAL PROTEIN                           | 1.7                                                  | 3.3                                                  | 2                        | 59                 |
| 1SVX           | DE NOVO PROTEIN/SUGAR BINDING PROTEIN   | 1.1                                                  | 2.1                                                  | 2                        | 14                 |
| 1SYQ           | CELL ADHESION                           | 1.5                                                  | 7.4                                                  | 5                        | 21                 |
| 1SYQ           | CELL ADHESION                           | 1.4                                                  | 5.5                                                  | 4                        | 23                 |
| 1SYQ           | CELL ADHESION                           | 1.3                                                  | 5.1                                                  | 4                        | 49                 |
| 1T0F           | DNA BINDING PROTEIN                     | 1.4                                                  | 2.7                                                  | 2                        | 13                 |
| 1T0F           | DNA BINDING PROTEIN                     | 1.7                                                  | 5.1                                                  | 3                        | 17                 |
| 1T0F           | DNA BINDING PROTEIN                     | 1.9                                                  | 5.8                                                  | 3                        | 7                  |
| 1T0F           | DNA BINDING PROTEIN                     | 1.4                                                  | 4.3                                                  | 3                        | 17                 |
| 1T0F           | DNA BINDING PROTEIN                     | 1.9                                                  | 3.8                                                  | 2                        | 5                  |
| 1T0F           | DNA BINDING PROTEIN                     | 1.8                                                  | 3.5                                                  | 2                        | 8                  |
| 1T2K           | TRANSCRIPTION/DNA                       | 1.3                                                  | 7.7                                                  | 6                        | 61                 |
| 1T2K           | TRANSCRIPTION/DNA                       | 1.3                                                  | 6.3                                                  | 5                        | 60                 |
| 1TA3           | HYDROLASE INHIBITOR/HYDROLASE           | 1.6                                                  | 6.5                                                  | 4                        | 13                 |
| 1TA3           | HYDROLASE INHIBITOR/HYDROLASE           | 1.0                                                  | 2.0                                                  | 2                        | 9                  |
| 1TB6           | HYDROLASE/BLOOD CLOTTING                | 1.6                                                  | 4.7                                                  | 3                        | 8                  |
| 1TCO           | COMPLEX (HYDROLASE/ISOMERASE)           | 1.4                                                  | 4.1                                                  | 3                        | 16                 |
| 1TCO           | COMPLEX (HYDROLASE/ISOMERASE)           | 1.8                                                  | 3.6                                                  | 2                        | 10                 |
| 1TFC           | TRANSCRIPTION                           | 1.6                                                  | 4.9                                                  | 3                        | 10                 |
| 1TH1           | CELL ADHESION/ANTITUMOR PROTEIN         | 1.5                                                  | 2.9                                                  | 2                        | 18                 |
| 1TH1           | CELL ADHESION/ANTITUMOR PROTEIN         | 1.6                                                  | 3.2                                                  | 2                        | 16                 |
| 1TH1           | CELL ADHESION/ANTITUMOR PROTEIN         | 1.7                                                  | 5.2                                                  | 3                        | 16                 |
| 1TH1           | CELL ADHESION/ANTITUMOR PROTEIN         | 1.3                                                  | 2.5                                                  | 2                        | 17                 |
| 1TH1           | CELL ADHESION/ANTITUMOR PROTEIN         | 1.1                                                  | 3.4                                                  | 3                        | 16                 |
| 1TH1           | CELL ADHESION/ANTITUMOR PROTEIN         | 1.1                                                  | 2.2                                                  | 2                        | 17                 |
| 1TI2           | OXIDOREDUCTASE                          | 1.6                                                  | 4.8                                                  | 3                        | 6                  |
| 1TI2           | OXIDOREDUCTASE                          | 1.3                                                  | 2.5                                                  | 2                        | 14                 |
| 1TI2           | OXIDOREDUCTASE                          | 1.6                                                  | 7.9                                                  | 5                        | 12                 |
| 1TI2           | OXIDOREDUCTASE                          | 1.2                                                  | 2.4                                                  | 2                        | 6                  |
| 1TI2           | OXIDOREDUCTASE                          | 1.9                                                  | 3.8                                                  | 2                        | 6                  |
| 1TI2           | OXIDOREDUCTASE                          | 1.5                                                  | 2.9                                                  | 2                        | 6                  |
| 1TIL           | TRANSCRIPTION                           | 1.1                                                  | 2.1                                                  | 2                        | 9                  |
| 1TIL           | TRANSCRIPTION                           | 1.7                                                  | 3.3                                                  | 2                        | 11                 |
| 1TIL           | TRANSCRIPTION                           | 1.8                                                  | 3.6                                                  | 2                        | 18                 |
| 1TN6           | TRANSFERASE                             | 1.9                                                  | 7.4                                                  | 4                        | 13                 |
| 1TN6           | TRANSFERASE                             | 1.8                                                  | 3.5                                                  | 2                        | 15                 |
| 1TOC           | COMPLEX (HYDROLASE/INHIBITOR)           | 1.3                                                  | 2.5                                                  | 2                        | 7                  |
| 1TQE           | TRANSCRIPTION/PROTEIN BINDING/DNA       | 1.4                                                  | 4.1                                                  | 3                        | 14                 |
| 1TQY           | TRANSFERASE                             | 1.9                                                  | 5.7                                                  | 3                        | 12                 |
| 1TQY           | TRANSFERASE                             | 1.0                                                  | 2.0                                                  | 2                        | 15                 |
| 1TQY           | TRANSFERASE                             | 1.8                                                  | 3.5                                                  | 2                        | 11                 |
| 1TQY           | TRANSFERASE                             | 1.6                                                  | 3.2                                                  | 2                        | 12                 |
| 1TQY           | TRANSFERASE                             | 1.8                                                  | 3.5                                                  | 2                        | 10                 |
| 1TQY           | TRANSFERASE                             | 1.6                                                  | 3.1                                                  | 2                        | 18                 |
| 1TU3           | PROTEIN TRANSPORT                       | 1.2                                                  | 3.7                                                  | 3                        | 33                 |
| 1TU3           | PROTEIN TRANSPORT                       | 1.2                                                  | 2.4                                                  | 2                        | 31                 |
| 1TU3           | PROTEIN TRANSPORT                       | 1.1                                                  | 2.1                                                  | 2                        | 6                  |
| 1TU3           | PROTEIN TRANSPORT                       | 1.5                                                  | 3.0                                                  | 2                        | 8                  |
| 1TU3           | PROTEIN TRANSPORT                       | 1.6                                                  | 4.7                                                  | 3                        | 31                 |
| 1TUE           | REPLICATION                             | 1.4                                                  | 2.8                                                  | 2                        | 13                 |
| 1TUE           | REPLICATION                             | 1.5                                                  | 5.8                                                  | 4                        | 11                 |
| 1TUE           | REPLICATION                             | 1.8                                                  | 3.6                                                  | 2                        | 23                 |
| 1TUE           | REPLICATION                             | 1.9                                                  | 3.8                                                  | 2                        | 13                 |
| 1TUE           | REPLICATION                             | 1.9                                                  | 3.8                                                  | 2                        | 14                 |
| 1TX4           | COMPLEX(GTPASE ACTIVATN/PROTO-ONCOGENE) | 1.7                                                  | 3.3                                                  | 2                        | 9                  |
| 1TY4           | APOPTOSIS                               | 1.9                                                  | 3.8                                                  | 2                        | 17                 |
| 1TY4           | APOPTOSIS                               | 1.4                                                  | 4.3                                                  | 3                        | 13                 |
| 1TYE           | CELL ADHESION                           | 1.8                                                  | 3.5                                                  | 2                        | 11                 |
| 1U0S           | SIGNALING PROTEIN                       | 1.4                                                  | 4.3                                                  | 3                        | 12                 |
| 1U54           | TRANSFERASE                             | 1.4                                                  | 2.8                                                  | 2                        | 6                  |
| 1U5T           | TRANSPORT PROTEIN                       | 1.6                                                  | 3.1                                                  | 2                        | 9                  |
| 1U6G           | LIGASE                                  | 1.4                                                  | 2.8                                                  | 2                        | 19                 |

TABLE S4

Jochim, et al

| A. PDB<br>CODE | J. HELIX START<br>RESIDUE # | K. HELIX END<br>RESIDUE # |
|----------------|-----------------------------|---------------------------|
| 1SVF           | 123                         | 183                       |
| 1SVF           | 123                         | 181                       |
| 1SVX           | 129                         | 142                       |
| 1SYQ           | 7                           | 27                        |
| 1SYQ           | 41                          | 63                        |
| 1SYQ           | 102                         | 150                       |
| 1TOF           | 61                          | 73                        |
| 1TOF           | 140                         | 156                       |
| 1TOF           | 521                         | 527                       |
| 1TOF           | 140                         | 156                       |
| 1TOF           | 547                         | 551                       |
| 1TOF           | 534                         | 541                       |
| 1T2K           | 254                         | 314                       |
| 1T2K           | 337                         | 396                       |
| 1TA3           | 233                         | 245                       |
| 1TA3           | 266                         | 274                       |
| 1TB6           | 14                          | 14                        |
| 1TCO           | 125                         | 140                       |
| 1TCO           | 149                         | 158                       |
| 1TFC           | 688                         | 697                       |
| 1TH1           | 249                         | 266                       |
| 1TH1           | 649                         | 664                       |
| 1TH1           | 375                         | 390                       |
| 1TH1           | 249                         | 265                       |
| 1TH1           | 649                         | 664                       |
| 1TH1           | 608                         | 624                       |
| 1TI2           | 254                         | 259                       |
| 1TI2           | 329                         | 342                       |
| 1TI2           | 18                          | 29                        |
| 1TI2           | 254                         | 259                       |
| 1TI2           | 254                         | 259                       |
| 1TI2           | 254                         | 259                       |
| 1TIL           | 108                         | 116                       |
| 1TIL           | 85                          | 95                        |
| 1TIL           | 24                          | 41                        |
| 1TN6           | 234                         | 246                       |
| 1TN6           | 166                         | 180                       |
| 1TOC           | 14                          | 14                        |
| 1TQE           | 111                         | 124                       |
| 1TQY           | 111                         | 122                       |
| 1TQY           | 171                         | 185                       |
| 1TQY           | 193                         | 203                       |
| 1TQY           | 137                         | 148                       |
| 1TQY           | 202                         | 211                       |
| 1TQY           | 161                         | 178                       |
| 1TU3           | 805                         | 837                       |
| 1TU3           | 807                         | 837                       |
| 1TU3           | 85                          | 90                        |
| 1TU3           | 83                          | 90                        |
| 1TU3           | 807                         | 837                       |
| 1TUE           | 460                         | 472                       |
| 1TUE           | 446                         | 456                       |
| 1TUE           | 4                           | 26                        |
| 1TUE           | 460                         | 472                       |
| 1TUE           | 460                         | 473                       |
| 1TX4           | 67                          | 75                        |
| 1TY4           | 168                         | 184                       |
| 1TY4           | 146                         | 158                       |
| 1TYE           | 315                         | 325                       |
| 1U0S           | 108                         | 119                       |
| 1U54           | 299                         | 304                       |
| 1U5T           | 457                         | 465                       |
| 1U6G           | 1077                        | 1095                      |

| A. PDB<br>CODE | L. HELIX SEQUENCE                                              |
|----------------|----------------------------------------------------------------|
| 1SVF           | AAVALVKANENAAAAILNLKNAIQKTNAAVADVQATQSLGTAVQAVQDHINSVVSPAITAA  |
| 1SVF           | AAVALVKANENAAAAILNLKNAIQKTNAAVADVQATQSLGTAVQAVQDHINSVVSPAIT    |
| 1SVX           | WEEIPALDKELKAK                                                 |
| 1SYQ           | RTIESILEPVAQQISHLVIMH                                          |
| 1SYQ           | TAPVAAVQAAVSNLVRVGKETVQ                                        |
| 1SYQ           | VPARDYLIDGSRGILSGTSDLLLTDFDEAEVRKIIRVCKGILEYLTVAEV             |
| 1T0F           | DLELAVFLSLEWE                                                  |
| 1T0F           | ERTLEKLELERRYWQQK                                              |
| 1T0F           | LRYYISQ                                                        |
| 1T0F           | ERTLEKLELERRYWQQK                                              |
| 1T0F           | MASLF                                                          |
| 1T0F           | MHERLKGG                                                       |
| 1T2K           | KAERKMRNRNRIAASKSRKRKLERIARLEEKVKTLKAQNSELASTANMLREQVAQLKQKVMN |
| 1T2K           | RRKFLERNRAAASRSRQKRKVVWVQSLEKKAEDLSSLNGLQSEVTLRNEVAQLKQLLLA    |
| 1TA3           | PKNVYYGVAPVAQ                                                  |
| 1TA3           | YSSLIKYYA                                                      |
| 1TB6           | ERELLESY                                                       |
| 1TCO           | DTQLQQIVDKTIINAD                                               |
| 1TCO           | FEFCAVVGG                                                      |
| 1TFC           | KILHRLLQEG                                                     |
| 1TH1           | DSVLFYAITTLHNLLLHQ                                             |
| 1TH1           | EGVATYAAAVLFRMSE                                               |
| 1TH1           | QRLVQNCLWTLRNLSD                                               |
| 1TH1           | DSVLFYAITTLHNLLLH                                              |
| 1TH1           | EGVATYAAAVLFRMSE                                               |
| 1TH1           | ENIQRVAAGVLCELAQD                                              |
| 1TI2           | HTARLV                                                         |
| 1TI2           | ACEIRALARQWAKK                                                 |
| 1TI2           | NCFMGCMDEHEL                                                   |
| 1TI2           | HTARLV                                                         |
| 1TI2           | HTARLV                                                         |
| 1TI2           | HTARLV                                                         |
| 1TIL           | MGFTIMENF                                                      |
| 1TIL           | PAVKRLFDMMSG                                                   |
| 1TIL           | HHTAEELREQVTDVLENR                                             |
| 1TN6           | NSVWNQRYFVISN                                                  |
| 1TN6           | YQVWHHRRVLEWLR                                                 |
| 1TOC           | EKELFES                                                        |
| 1TQE           | TEVKQKLQEFLLSK                                                 |
| 1TQY           | ATSLEREYLLLS                                                   |
| 1TQY           | SGLDSVGNVRAIEE                                                 |
| 1TQY           | PWGWSQIASG                                                     |
| 1TQY           | YAVNTGQISIRH                                                   |
| 1TQY           | PIVVACFDAI                                                     |
| 1TQY           | QAGGLDALGHARTIRRG                                              |
| 1TU3           | QRLQTELDVSEVQVRDFVKLSQTLQVQLERIRQ                              |
| 1TU3           | LQTELDVSEVQVRDFVKLSQTLQVQLERIRQ                                |
| 1TU3           | LAPMY                                                          |
| 1TU3           | HSLAPMY                                                        |
| 1TU3           | LQTELDVSEVQVRDFVKLSQTLQVQLERIRQ                                |
| 1TUE           | FITFLGALKSFLK                                                  |
| 1TUE           | WRPIVQFLRYQ                                                    |
| 1TUE           | PKETLSERLSALQDKIIDHYEND                                        |
| 1TUE           | FITFLGALKSFLK                                                  |
| 1TUE           | FITFLGALKSFLKG                                                 |
| 1TX4           | DRLRPLSYP                                                      |
| 1TY4           | YGRLIGLISFGGFVAAK                                              |
| 1TY4           | FSPYQDVVRTVGN                                                  |
| 1TYE           | VNLYQNYSELI                                                    |
| 1U0S           | PSRVVEALNKVS                                                   |
| 1U54           | x                                                              |
| 1U5T           | PMEMREACE                                                      |
| 1U6G           | DGLDIRKAAFECMYTLLDS                                            |

| A. PDB<br>CODE | M. RESOLUTION |
|----------------|---------------|
| 1SVF           | 1.4           |
| 1SVF           | 1.4           |
| 1SVX           | 2.24          |
| 1SYQ           | 2.42          |
| 1SYQ           | 2.42          |
| 1SYQ           | 2.42          |
| 1TOF           | 1.85          |
| 1TOF           | 1.85          |
| 1TOF           | 1.85          |
| 1TOF           | 1.85          |
| 1TOF           | 1.85          |
| 1TOF           | 1.85          |
| 1T2K           | 3             |
| 1T2K           | 3             |
| 1TA3           | 1.7           |
| 1TA3           | 1.7           |
| 1TB6           | 2.5           |
| 1TCO           | 2.5           |
| 1TCO           | 2.5           |
| 1TFC           | 2.4           |
| 1TH1           | 2.5           |
| 1TH1           | 2.5           |
| 1TH1           | 2.5           |
| 1TH1           | 2.5           |
| 1TH1           | 2.5           |
| 1TH1           | 2.5           |
| 1TI2           | 2.35          |
| 1TI2           | 2.35          |
| 1TI2           | 2.35          |
| 1TI2           | 2.35          |
| 1TI2           | 2.35          |
| 1TI2           | 2.35          |
| 1TIL           | 2.7           |
| 1TIL           | 2.7           |
| 1TIL           | 2.7           |
| 1TN6           | 1.8           |
| 1TN6           | 1.8           |
| 1TOC           | 3.1           |
| 1TQE           | 2.7           |
| 1TQY           | 2             |
| 1TQY           | 2             |
| 1TQY           | 2             |
| 1TQY           | 2             |
| 1TQY           | 2             |
| 1TQY           | 2             |
| 1TU3           | 2.31          |
| 1TU3           | 2.31          |
| 1TU3           | 2.31          |
| 1TU3           | 2.31          |
| 1TU3           | 2.31          |
| 1TUE           | 2.1           |
| 1TUE           | 2.1           |
| 1TUE           | 2.1           |
| 1TUE           | 2.1           |
| 1TUE           | 2.1           |
| 1TX4           | 1.65          |
| 1TY4           | 2.2           |
| 1TY4           | 2.2           |
| 1TYE           | 2.9           |
| 1U0S           | 1.9           |
| 1U54           | 2.8           |
| 1U5T           | 3.6           |
| 1U6G           | 3.1           |

| A. PDB CODE | B. INTERFACE CHAINS | C. CHAIN | D. TITLE                                                                                 |
|-------------|---------------------|----------|------------------------------------------------------------------------------------------|
| 1U6G        | A C                 | C        | CRYSTAL STRUCTURE OF THE CAND1-CUL1-ROC1 COMPLEX                                         |
| 1U6H        | AB                  | A        | VINCULIN HEAD (0-258) IN COMPLEX WITH THE TALIN VINCULIN BINDING SITE 2 (849-879)        |
| 1U6H        | AB                  | A        | VINCULIN HEAD (0-258) IN COMPLEX WITH THE TALIN VINCULIN BINDING SITE 2 (849-879)        |
| 1U6H        | AB                  | B        | VINCULIN HEAD (0-258) IN COMPLEX WITH THE TALIN VINCULIN BINDING SITE 2 (849-879)        |
| 1U7F        | CB                  | B        | CRYSTAL STRUCTURE OF THE PHOSPHORYLATED SMAD3/SMAD4 HETEROTRIMERIC COMPLEX               |
| 1U8T        | AE                  | E        | CRYSTAL STRUCTURE OF CHEY D13K Y106W ALONE AND IN COMPLEX WITH A FLIM PEPTIDE            |
| 1UB4        | AC                  | A        | CRYSTAL STRUCTURE OF MAZEF COMPLEX                                                       |
| 1UEA        | CD                  | C        | MMP-3/TIMP-1 COMPLEX                                                                     |
| 1UEL        | AB                  | B        | SOLUTION STRUCTURE OF UBIQUITIN-LIKE DOMAIN OF HHR23B COMPLEXED WITH UBIQUITIN-INTERA    |
| 1UHL        | AB                  | A        | CRYSTAL STRUCTURE OF THE LXRALFA-RXRbeta LBD HETERODIMER                                 |
| 1UJW        | AB                  | B        | STRUCTURE OF THE COMPLEX BETWEEN BTUB AND COLICIN E3 RECEPTOR BINDING DOMAIN             |
| 1UKL        | AD                  | D        | CRYSTAL STRUCTURE OF IMPORTIN-BETA AND SREBP-2 COMPLEX                                   |
| 1URQ        | AD                  | A        | CRYSTAL STRUCTURE OF NEURONAL Q-SNARES IN COMPLEX WITH R-SNARE MOTIF OF TOMOSYN          |
| 1URQ        | AD                  | D        | CRYSTAL STRUCTURE OF NEURONAL Q-SNARES IN COMPLEX WITH R-SNARE MOTIF OF TOMOSYN          |
| 1URQ        | BC                  | B        | CRYSTAL STRUCTURE OF NEURONAL Q-SNARES IN COMPLEX WITH R-SNARE MOTIF OF TOMOSYN          |
| 1URQ        | CD                  | C        | CRYSTAL STRUCTURE OF NEURONAL Q-SNARES IN COMPLEX WITH R-SNARE MOTIF OF TOMOSYN          |
| 1URQ        | CD                  | D        | CRYSTAL STRUCTURE OF NEURONAL Q-SNARES IN COMPLEX WITH R-SNARE MOTIF OF TOMOSYN          |
| 1USV        | CD                  | C        | THE STRUCTURE OF THE COMPLEX BETWEEN AHA1 AND HSP90                                      |
| 1USV        | GH                  | G        | THE STRUCTURE OF THE COMPLEX BETWEEN AHA1 AND HSP90                                      |
| 1UW4        | DC                  | D        | THE STRUCTURAL BASIS OF THE INTERACTION BETWEEN NONSENSE MEDIATED DECAY FACTORS UPF2     |
| 1VCB        | BC                  | C        | THE VHL-ELONGINC-ELONGINB STRUCTURE                                                      |
| 1VCB        | EF                  | E        | THE VHL-ELONGINC-ELONGINB STRUCTURE                                                      |
| 1VCB        | HI                  | H        | THE VHL-ELONGINC-ELONGINB STRUCTURE                                                      |
| 1VF6        | AC                  | A        | 2.1 ANGSTROM CRYSTAL STRUCTURE OF THE PALS-1-L27N AND PATJ L27 HETERODIMER COMPLEX       |
| 1VF6        | AC                  | C        | 2.1 ANGSTROM CRYSTAL STRUCTURE OF THE PALS-1-L27N AND PATJ L27 HETERODIMER COMPLEX       |
| 1VF6        | BD                  | B        | 2.1 ANGSTROM CRYSTAL STRUCTURE OF THE PALS-1-L27N AND PATJ L27 HETERODIMER COMPLEX       |
| 1VF6        | BD                  | B        | 2.1 ANGSTROM CRYSTAL STRUCTURE OF THE PALS-1-L27N AND PATJ L27 HETERODIMER COMPLEX       |
| 1VF6        | BD                  | D        | 2.1 ANGSTROM CRYSTAL STRUCTURE OF THE PALS-1-L27N AND PATJ L27 HETERODIMER COMPLEX       |
| 1VF6        | BD                  | D        | 2.1 ANGSTROM CRYSTAL STRUCTURE OF THE PALS-1-L27N AND PATJ L27 HETERODIMER COMPLEX       |
| 1VF6        | BD                  | D        | 2.1 ANGSTROM CRYSTAL STRUCTURE OF THE PALS-1-L27N AND PATJ L27 HETERODIMER COMPLEX       |
| 1VF6        | BD                  | D        | 2.1 ANGSTROM CRYSTAL STRUCTURE OF THE PALS-1-L27N AND PATJ L27 HETERODIMER COMPLEX       |
| 1VG0        | AB                  | A        | THE CRYSTAL STRUCTURES OF THE REP-1 PROTEIN IN COMPLEX WITH MONOPRENYLATED RAB7 PROTI    |
| 1VG9        | AB                  | A        | THE CRYSTAL STRUCTURES OF THE REP-1 PROTEIN IN COMPLEX WITH C-TERMINALLY TRUNCATED RA    |
| 1VYW        | AB                  | A        | STRUCTURE OF CDK2/CYCLIN A WITH PNU-292137                                               |
| 1VYW        | AB                  | B        | STRUCTURE OF CDK2/CYCLIN A WITH PNU-292137                                               |
| 1VYW        | CD                  | D        | STRUCTURE OF CDK2/CYCLIN A WITH PNU-292137                                               |
| 1W11        | AF                  | F        | CRYSTAL STRUCTURE OF DIPEPTIDYL PEPTIDASE IV (DPPIV OR CD26) IN COMPLEX WITH ADENOSINE D |
| 1W11        | AF                  | F        | CRYSTAL STRUCTURE OF DIPEPTIDYL PEPTIDASE IV (DPPIV OR CD26) IN COMPLEX WITH ADENOSINE D |
| 1W7P        | AD                  | A        | THE CRYSTAL STRUCTURE OF ENDOSOMAL COMPLEX ESCRT-II (VPS22/VPS25/VPS36)                  |
| 1WMH        | AB                  | A        | CRYSTAL STRUCTURE OF A PB1 DOMAIN COMPLEX OF PROTEIN KINASE C IOTA AND PAR6 ALPHA        |
| 1WPX        | AB                  | A        | CRYSTAL STRUCTURE OF CARBOXYPEPTIDASE Y INHIBITOR COMPLEXED WITH THE COGNATE PROTEIN     |
| 1WQ1        | RG                  | G        | RAS-RASGAP COMPLEX                                                                       |
| 1WQ1        | RG                  | R        | RAS-RASGAP COMPLEX                                                                       |
| 1WRD        | AB                  | A        | CRYSTAL STRUCTURE OF TOM1 GAT DOMAIN IN COMPLEX WITH UBIQUITIN                           |
| 1WRD        | AB                  | A        | CRYSTAL STRUCTURE OF TOM1 GAT DOMAIN IN COMPLEX WITH UBIQUITIN                           |
| 1WX5        | AB                  | A        | CRYSTAL STRUCTURE OF THE COPPER-FREE STREPTOMYCES CASTANEOGLOBISPORUS TYROSINASE C       |
| 1X3Z        | AB                  | A        | STRUCTURE OF A PEPTIDE:N-GLYCANASE-RAD23 COMPLEX                                         |
| 1X3Z        | AB                  | B        | STRUCTURE OF A PEPTIDE:N-GLYCANASE-RAD23 COMPLEX                                         |
| 1X3Z        | AB                  | B        | STRUCTURE OF A PEPTIDE:N-GLYCANASE-RAD23 COMPLEX                                         |
| 1X79        | AB                  | B        | CRYSTAL STRUCTURE OF HUMAN GGA1 GAT DOMAIN COMPLEXED WITH THE GAT-BINDING DOMAIN OI      |
| 1X79        | AC                  | C        | CRYSTAL STRUCTURE OF HUMAN GGA1 GAT DOMAIN COMPLEXED WITH THE GAT-BINDING DOMAIN OI      |
| 1X86        | AB                  | A        | CRYSTAL STRUCTURE OF THE DH/PH DOMAINS OF LEUKEMIA- ASSOCIATED RHOGEF IN COMPLEX WITI    |
| 1X86        | AB                  | B        | CRYSTAL STRUCTURE OF THE DH/PH DOMAINS OF LEUKEMIA- ASSOCIATED RHOGEF IN COMPLEX WITI    |
| 1X86        | GH                  | G        | CRYSTAL STRUCTURE OF THE DH/PH DOMAINS OF LEUKEMIA- ASSOCIATED RHOGEF IN COMPLEX WITI    |
| 1XCG        | AB                  | A        | CRYSTAL STRUCTURE OF HUMAN RHOA IN COMPLEX WITH DH/PH FRAGMENT OF PDZRHOGEF              |
| 1XCG        | AB                  | A        | CRYSTAL STRUCTURE OF HUMAN RHOA IN COMPLEX WITH DH/PH FRAGMENT OF PDZRHOGEF              |
| 1XCG        | EF                  | E        | CRYSTAL STRUCTURE OF HUMAN RHOA IN COMPLEX WITH DH/PH FRAGMENT OF PDZRHOGEF              |
| 1XCG        | EF                  | F        | CRYSTAL STRUCTURE OF HUMAN RHOA IN COMPLEX WITH DH/PH FRAGMENT OF PDZRHOGEF              |
| 1XD2        | AC                  | A        | CRYSTAL STRUCTURE OF A TERNARY RAS:SOS:RAS*GDP COMPLEX                                   |
| 1XD2        | BC                  | B        | CRYSTAL STRUCTURE OF A TERNARY RAS:SOS:RAS*GDP COMPLEX                                   |
| 1XD2        | BC                  | C        | CRYSTAL STRUCTURE OF A TERNARY RAS:SOS:RAS*GDP COMPLEX                                   |
| 1XDK        | AB                  | A        | CRYSTAL STRUCTURE OF THE RARBETA/RXRALPHA LIGAND BINDING DOMAIN HETERODIMER IN COMI      |
| 1XDK        | AB                  | A        | CRYSTAL STRUCTURE OF THE RARBETA/RXRALPHA LIGAND BINDING DOMAIN HETERODIMER IN COMI      |
| 1XDK        | EF                  | F        | CRYSTAL STRUCTURE OF THE RARBETA/RXRALPHA LIGAND BINDING DOMAIN HETERODIMER IN COMI      |



TABLE S4

Jochim, et al

| A. PDB<br>CODE | E. FUNCTION                              | F. $\Delta\Delta G_{\text{AVG,HELIX}}$<br>(KCAL/MOL) | G. $\Delta\Delta G_{\text{SUM,HELIX}}$<br>(KCAL/MOL) | H. # HOTSPOT<br>RESIDUES | I. HELIX<br>LENGTH |
|----------------|------------------------------------------|------------------------------------------------------|------------------------------------------------------|--------------------------|--------------------|
| 1U6G           | LIGASE                                   | 1.3                                                  | 2.6                                                  | 2                        | 15                 |
| 1U6H           | CELL ADHESION                            | 1.2                                                  | 2.4                                                  | 2                        | 24                 |
| 1U6H           | CELL ADHESION                            | 1.1                                                  | 2.1                                                  | 2                        | 46                 |
| 1U6H           | CELL ADHESION                            | 1.9                                                  | 7.5                                                  | 4                        | 21                 |
| 1U7F           | SIGNALING PROTEIN                        | 1.2                                                  | 3.7                                                  | 3                        | 13                 |
| 1U8T           | SIGNALING PROTEIN                        | 1.6                                                  | 3.1                                                  | 2                        | 9                  |
| 1UB4           | DNA BINDING PROTEIN                      | 1.5                                                  | 3.0                                                  | 2                        | 15                 |
| 1UEA           | COMPLEX (METALLOPROTEASE/INHIBITOR)      | 1.5                                                  | 3.0                                                  | 2                        | 13                 |
| 1UEL           | GENE REGULATION/PROTEIN BINDING          | 1.3                                                  | 5.0                                                  | 4                        | 16                 |
| 1UHL           | DNA BINDING PROTEIN                      | 1.7                                                  | 3.3                                                  | 2                        | 17                 |
| 1UJW           | TRANSPORT PROTEIN/HYDROLASE              | 1.7                                                  | 3.3                                                  | 2                        | 32                 |
| 1UKL           | PROTEIN TRANSPORT/DNA BINDING PROTEIN    | 1.9                                                  | 3.7                                                  | 2                        | 21                 |
| 1URQ           | TRANSPORT PROTEIN                        | 1.4                                                  | 4.1                                                  | 3                        | 56                 |
| 1URQ           | TRANSPORT PROTEIN                        | 1.5                                                  | 10.7                                                 | 7                        | 60                 |
| 1URQ           | TRANSPORT PROTEIN                        | 1.7                                                  | 16.9                                                 | 10                       | 61                 |
| 1URQ           | TRANSPORT PROTEIN                        | 1.7                                                  | 16.9                                                 | 10                       | 65                 |
| 1URQ           | TRANSPORT PROTEIN                        | 1.9                                                  | 15.2                                                 | 8                        | 60                 |
| 1USV           | CHAPERONE                                | 1.2                                                  | 2.4                                                  | 2                        | 24                 |
| 1USV           | CHAPERONE                                | 1.4                                                  | 4.2                                                  | 3                        | 22                 |
| 1UW4           | RNA-BINDING PROTEIN                      | 1.5                                                  | 7.6                                                  | 5                        | 22                 |
| 1VCB           | TRANSCRIPTION                            | 1.7                                                  | 3.4                                                  | 2                        | 13                 |
| 1VCB           | TRANSCRIPTION                            | 1.9                                                  | 3.7                                                  | 2                        | 18                 |
| 1VCB           | TRANSCRIPTION                            | 1.8                                                  | 3.6                                                  | 2                        | 15                 |
| 1VF6           | PROTEIN BINDING/PROTEIN TRANSPORT        | 1.4                                                  | 4.2                                                  | 3                        | 15                 |
| 1VF6           | PROTEIN BINDING/PROTEIN TRANSPORT        | 1.7                                                  | 3.3                                                  | 2                        | 15                 |
| 1VF6           | PROTEIN BINDING/PROTEIN TRANSPORT        | 1.7                                                  | 5.1                                                  | 3                        | 24                 |
| 1VF6           | PROTEIN BINDING/PROTEIN TRANSPORT        | 1.0                                                  | 3.1                                                  | 3                        | 16                 |
| 1VF6           | PROTEIN BINDING/PROTEIN TRANSPORT        | 1.5                                                  | 4.5                                                  | 3                        | 14                 |
| 1VF6           | PROTEIN BINDING/PROTEIN TRANSPORT        | 1.7                                                  | 5.1                                                  | 3                        | 16                 |
| 1VF6           | PROTEIN BINDING/PROTEIN TRANSPORT        | 1.9                                                  | 3.8                                                  | 2                        | 13                 |
| 1VG0           | PROTEIN BINDING/PROTEIN TRANSPORT        | 1.9                                                  | 5.8                                                  | 3                        | 15                 |
| 1VG9           | PROTEIN BINDING/PROTEIN TRANSPORT        | 1.7                                                  | 3.4                                                  | 2                        | 15                 |
| 1VYW           | TRANSFERASE                              | 1.4                                                  | 2.8                                                  | 2                        | 13                 |
| 1VYW           | TRANSFERASE                              | 1.3                                                  | 2.6                                                  | 2                        | 15                 |
| 1VYW           | TRANSFERASE                              | 1.4                                                  | 4.3                                                  | 3                        | 15                 |
| 1W1I           | HYDROLASE                                | 1.4                                                  | 4.2                                                  | 3                        | 19                 |
| 1W1I           | HYDROLASE                                | 1.9                                                  | 3.8                                                  | 2                        | 18                 |
| 1W7P           | PROTEIN TRANSPORT                        | 1.7                                                  | 5.2                                                  | 3                        | 24                 |
| 1WMH           | TRANSFERASE/CELL CYCLE                   | 1.7                                                  | 6.6                                                  | 4                        | 14                 |
| 1WPX           | HYDROLASE                                | 1.4                                                  | 2.7                                                  | 2                        | 8                  |
| 1WQ1           | COMPLEX (GTP-BINDING/GTPASE ACTIVATION)  | 1.4                                                  | 2.8                                                  | 2                        | 14                 |
| 1WQ1           | COMPLEX (GTP-BINDING/GTPASE ACTIVATION)  | 1.3                                                  | 2.6                                                  | 2                        | 18                 |
| 1WRD           | PROTEIN TRANSPORT/SIGNALING PROTEIN      | 1.2                                                  | 2.4                                                  | 2                        | 25                 |
| 1WRD           | PROTEIN TRANSPORT/SIGNALING PROTEIN      | 1.6                                                  | 4.7                                                  | 3                        | 28                 |
| 1WX5           | OXIDOREDUCTASE/METAL TRANSPORT           | 1.5                                                  | 3.0                                                  | 2                        | 10                 |
| 1X3Z           | HYDROLASE                                | 1.9                                                  | 7.6                                                  | 4                        | 20                 |
| 1X3Z           | HYDROLASE                                | 1.5                                                  | 2.9                                                  | 2                        | 10                 |
| 1X3Z           | HYDROLASE                                | 1.9                                                  | 3.7                                                  | 2                        | 12                 |
| 1X79           | PROTEIN TRANSPORT                        | 1.3                                                  | 3.9                                                  | 3                        | 88                 |
| 1X79           | PROTEIN TRANSPORT                        | 1.3                                                  | 3.9                                                  | 3                        | 81                 |
| 1X86           | SIGNALING PROTEIN/MEMBRANE PROTEIN       | 1.8                                                  | 3.6                                                  | 2                        | 10                 |
| 1X86           | SIGNALING PROTEIN/MEMBRANE PROTEIN       | 1.5                                                  | 2.9                                                  | 2                        | 9                  |
| 1X86           | SIGNALING PROTEIN/MEMBRANE PROTEIN       | 1.9                                                  | 3.8                                                  | 2                        | 13                 |
| 1XCG           | SIGNALING PROTEIN ACTIVATOR/SIGNALING PR | 1.9                                                  | 3.8                                                  | 2                        | 38                 |
| 1XCG           | SIGNALING PROTEIN ACTIVATOR/SIGNALING PR | 1.4                                                  | 2.7                                                  | 2                        | 19                 |
| 1XCG           | SIGNALING PROTEIN ACTIVATOR/SIGNALING PR | 1.2                                                  | 3.5                                                  | 3                        | 38                 |
| 1XCG           | SIGNALING PROTEIN ACTIVATOR/SIGNALING PR | 1.6                                                  | 4.7                                                  | 3                        | 9                  |
| 1XD2           | SIGNALING PROTEIN                        | 1.1                                                  | 3.3                                                  | 3                        | 11                 |
| 1XD2           | SIGNALING PROTEIN                        | 1.9                                                  | 3.8                                                  | 2                        | 8                  |
| 1XD2           | SIGNALING PROTEIN                        | 1.1                                                  | 2.1                                                  | 2                        | 13                 |
| 1XDK           | HORMONE/GROWTH FACTOR RECEPTOR           | 1.8                                                  | 7.2                                                  | 4                        | 21                 |
| 1XDK           | HORMONE/GROWTH FACTOR RECEPTOR           | 1.3                                                  | 2.5                                                  | 2                        | 7                  |
| 1XDK           | HORMONE/GROWTH FACTOR RECEPTOR           | 1.8                                                  | 5.5                                                  | 3                        | 7                  |

TABLE S4

Jochim, et al

| A. PDB<br>CODE | J. HELIX START<br>RESIDUE # | K. HELIX END<br>RESIDUE # |
|----------------|-----------------------------|---------------------------|
| IU6G           | 348                         | 362                       |
| IU6H           | 40                          | 63                        |
| IU6H           | 101                         | 146                       |
| IU6H           | 854                         | 874                       |
| IU7F           | 530                         | 542                       |
| IU8T           | 8                           | 16                        |
| IUB4           | 96                          | 110                       |
| IUEA           | 195                         | 207                       |
| IUEL           | 283                         | 298                       |
| IUHL           | 457                         | 473                       |
| IUJW           | 386                         | 417                       |
| IUKL           | 369                         | 389                       |
| IURQ           | 1053                        | 1108                      |
| IURQ           | 140                         | 199                       |
| IURQ           | 197                         | 257                       |
| IURQ           | 17                          | 81                        |
| IURQ           | 140                         | 199                       |
| IUSV           | 387                         | 410                       |
| IUSV           | 387                         | 408                       |
| IUW4           | 839                         | 860                       |
| IVCB           | 158                         | 170                       |
| IVCB           | 67                          | 84                        |
| IVCB           | 97                          | 111                       |
| IVF6           | 13                          | 27                        |
| IVF6           | 122                         | 136                       |
| IVF6           | 45                          | 68                        |
| IVF6           | 11                          | 26                        |
| IVF6           | 157                         | 170                       |
| IVF6           | 141                         | 156                       |
| IVF6           | 124                         | 136                       |
| IVG0           | 377                         | 391                       |
| IVG9           | 377                         | 391                       |
| IVYW           | 46                          | 58                        |
| IVYW           | 288                         | 302                       |
| IVYW           | 288                         | 302                       |
| IWI1           | 126                         | 144                       |
| IWI1           | 76                          | 93                        |
| IW7P           | 87                          | 110                       |
| IWMH           | 74                          | 87                        |
| IWPX           | 301                         | 308                       |
| IWQ1           | 793                         | 806                       |
| IWQ1           | 87                          | 104                       |
| IWRD           | 217                         | 241                       |
| IWRD           | 248                         | 275                       |
| IWX5           | 189                         | 198                       |
| IX3Z           | 12                          | 31                        |
| IX3Z           | 276                         | 285                       |
| IX3Z           | 259                         | 270                       |
| IX79           | 553                         | 640                       |
| IX79           | 554                         | 634                       |
| IX86           | 932                         | 941                       |
| IX86           | 67                          | 75                        |
| IX86           | 785                         | 797                       |
| IXCG           | 730                         | 767                       |
| IXCG           | 877                         | 895                       |
| IXCG           | 901                         | 938                       |
| IXCG           | 67                          | 75                        |
| IXD2           | 65                          | 75                        |
| IXD2           | 68                          | 75                        |
| IXD2           | 930                         | 942                       |
| IXDK           | 391                         | 411                       |
| IXDK           | 419                         | 425                       |
| IXDK           | 366                         | 372                       |

| A. PDB<br>CODE | L. HELIX SEQUENCE                                                                             |
|----------------|-----------------------------------------------------------------------------------------------|
| IU6G           | KVRRAAAKCLDAVVS                                                                               |
| IU6H           | TAPVSAVQAAVSNLVRVGKETVQT                                                                      |
| IU6H           | VPARDYLIDGSRGILSGTSDLLLTDFDEAEVRKIIRVCKGILEYLTV                                               |
| IU6H           | RKLLSAAKILADATAKMVEAA                                                                         |
| IU7F           | HRALQLLDEVLHT                                                                                 |
| IU8T           | QAEIDALLN                                                                                     |
| IUB4           | PEELQLIKAKINVL I                                                                              |
| IUEA           | LFLVAAHEIGHSL                                                                                 |
| IUEL           | EEEQIAYAMQMSLQGA                                                                              |
| IUHL           | PSEVEVLREKVYASLET                                                                             |
| IUJW           | GHRMWQMAGLKAQRAQTDVNNKQAAFDAAAKE                                                              |
| IUKL           | VLRKAIDYIKYLQQVNHKLRQ                                                                         |
| IURQ           | EGVKGAASGVV GELARARLALDERGQKLS DLEERTAAMMSSADSFSKHAHEMMLKY                                    |
| IURQ           | SRENEMDENLEQVSGIIGNLRHMALDMGNEIDTQNRQIDRIMEKADSNKTRIDEANQRAT                                  |
| IURQ           | TRHSEIKLENSIRELHDMFMDMAMLVESQGEMIDRIEYNVEHAVDYVERAVSDTKKAVKY                                  |
| IURQ           | RADQLADESLESTRMLQLVEESKDAGIRTLVMLDEQGEQLDRVEEGMNHNQDMKEAEKNLKD L                              |
| IURQ           | SRENEMDENLEQVSGIIGNLRHMALDMGNEIDTQNRQIDRIMEKADSNKTRIDEANQRAT                                  |
| IUSV           | KIMKVIRKNIVKKLIEAFNEIAED                                                                      |
| IUSV           | KIMKVIRKNIVKKLIEAFNEIA                                                                        |
| IUW4           | EDVGIHVVDGVLEDIRLGMEVN                                                                        |
| IVCB           | LKERCLQVVRSLV                                                                                 |
| IVCB           | SHVLSKVCMYFTYKVRVT                                                                            |
| IVCB           | PEIALELLMAANFLD                                                                               |
| IVF6           | LQVLDR LKMKLQEKG                                                                              |
| IVF6           | PDVEDLFSSLKHIQH                                                                               |
| IVF6           | PLFNQILTLQOSIKQLKGNHIL                                                                        |
| IVF6           | QVLQVLDR LKMKLQEK                                                                             |
| IVF6           | RDFQNAFKIHNAV T                                                                               |
| IVF6           | SQSQEDISLLQLVQN                                                                               |
| IVF6           | VEDLFSSLKHIQH                                                                                 |
| IVG0           | QGELPQCFCRMC AVF                                                                              |
| IVG9           | QGELPQCFCRMC AVF                                                                              |
| IVYW           | STAIRESLLKEL                                                                                  |
| IVYW           | KKQVLRMEHLVLKVL                                                                               |
| IVYW           | KKQVLRMEHLVLKVL                                                                               |
| 1W11           | PDEVVSLVNOGLQEGERDF                                                                           |
| 1W11           | RDAIKRIAYEFVEMKAKD                                                                            |
| 1W7P           | TVNDFY YEVCLKVIEICRQTKDMN                                                                     |
| 1WMH           | QLELEEAFRLYELN                                                                                |
| 1WPX           | DINRNFLF                                                                                      |
| 1WQ1           | LASTLMEQYMKATA                                                                                |
| 1WQ1           | TKSFEDIHQYREQIKRVK                                                                            |
| 1WRD           | IGKLRSELEMVSGNVRVMSEMLTEL                                                                     |
| 1WRD           | PADLELLQELNRTC RAMQQRVLELIPQI                                                                 |
| 1WX5           | LHNRVHVWVG                                                                                    |
| 1X3Z           | FDSIAKMLLIKYKDFILSKF                                                                          |
| 1X3Z           | LAPLLENISA                                                                                    |
| 1X3Z           | VEDLLSLRQVVS                                                                                  |
| 1X79           | TRDQVKKLQLMLRQANDQLEKTMKDKQELED FIKQSSEDSSHQISALV LRAQASEILLEELQQGLSQA KR DVQE QMAVLMQSREQVSE |
| 1X79           | RDQVKKLQLMLRQANDQLEKTMKDKQELED FIKQSSEDSSHQISALV LRAQASEILLEELQQGLSQA KR DVQE QMAVLMQS        |
| 1X86           | TQMQLTKYP                                                                                     |
| 1X86           | DRLRPLSYP                                                                                     |
| 1X86           | EIKRQEVINELFY                                                                                 |
| 1XCG           | QREIDRQEVINELFVTEASHLRTLRLVLDLIFYQRMKKE                                                       |
| 1XCG           | SEMQLTKYPLLESIIKH                                                                             |
| 1XCG           | SEHEKLCRARDQCREILKYVNEAVKQTENRHRLEGYQK                                                        |
| 1XCG           | DRLRPLSYP                                                                                     |
| 1XD2           | SAMRDQYMRTG                                                                                   |
| 1XD2           | RDQYMRTG                                                                                      |
| 1XD2           | FGIYLTNLIKTEE                                                                                 |
| 1XDK           | PAEVEALREKVYASLEAYCKH                                                                         |
| 1XDK           | RFKLLL                                                                                        |
| 1XDK           | MFPKILM                                                                                       |

| A. PDB<br>CODE | M. RESOLUTION |
|----------------|---------------|
| IU6G           | 3.1           |
| IU6H           | 2.38          |
| IU6H           | 2.38          |
| IU6H           | 2.38          |
| IU7F           | 2.6           |
| IU8T           | 1.5           |
| IUB4           | 1.7           |
| IUEA           | 2.8           |
| IUEL           | NOT APP       |
| IUHL           | 2.9           |
| IUJW           | 2.75          |
| IUKL           | 3             |
| IURQ           | 2             |
| IURQ           | 2             |
| IURQ           | 2             |
| IURQ           | 2             |
| IURQ           | 2             |
| IUSV           | 2.7           |
| IUSV           | 2.7           |
| IUW4           | 1.95          |
| IVCB           | 2.7           |
| IVCB           | 2.7           |
| IVCB           | 2.7           |
| IVF6           | 2.1           |
| IVF6           | 2.1           |
| IVF6           | 2.1           |
| IVF6           | 2.1           |
| IVF6           | 2.1           |
| IVF6           | 2.1           |
| IVF6           | 2.1           |
| IVG0           | 2.2           |
| IVG9           | 2.5           |
| IVYW           | 2.3           |
| IVYW           | 2.3           |
| IVYW           | 2.3           |
| IWI1           | 3.03          |
| IWI1           | 3.03          |
| IW7P           | 3.6           |
| IWMH           | 1.5           |
| IWPX           | 2.7           |
| IWQ1           | 2.5           |
| IWQ1           | 2.5           |
| IWRD           | 1.75          |
| IWRD           | 1.75          |
| IWX5           | 2.02          |
| IX3Z           | 2.8           |
| IX3Z           | 2.8           |
| IX3Z           | 2.8           |
| IX79           | 2.41          |
| IX79           | 2.41          |
| IX86           | 3.22          |
| IX86           | 3.22          |
| IX86           | 3.22          |
| IXCG           | 2.5           |
| IXCG           | 2.5           |
| IXCG           | 2.5           |
| IXCG           | 2.5           |
| IXCG           | 2.5           |
| IXD2           | 2.7           |
| IXD2           | 2.7           |
| IXD2           | 2.7           |
| IXDK           | 2.9           |
| IXDK           | 2.9           |
| IXDK           | 2.9           |

| A. PDB CODE | B. INTERFACE CHAINS | C. CHAIN | D. TITLE                                                                                |
|-------------|---------------------|----------|-----------------------------------------------------------------------------------------|
| 1XFU        | A O                 | A        | CRYSTAL STRUCTURE OF ANTHRAX EDEMA FACTOR (EF) TRUNCATION MUTANT, EF-DELTA 64 IN COMPI  |
| 1XFU        | A O                 | O        | CRYSTAL STRUCTURE OF ANTHRAX EDEMA FACTOR (EF) TRUNCATION MUTANT, EF-DELTA 64 IN COMPI  |
| 1XFU        | C Q                 | C        | CRYSTAL STRUCTURE OF ANTHRAX EDEMA FACTOR (EF) TRUNCATION MUTANT, EF-DELTA 64 IN COMPI  |
| 1XFU        | C Q                 | Q        | CRYSTAL STRUCTURE OF ANTHRAX EDEMA FACTOR (EF) TRUNCATION MUTANT, EF-DELTA 64 IN COMPI  |
| 1XFU        | E S                 | E        | CRYSTAL STRUCTURE OF ANTHRAX EDEMA FACTOR (EF) TRUNCATION MUTANT, EF-DELTA 64 IN COMPI  |
| 1XFU        | F T                 | T        | CRYSTAL STRUCTURE OF ANTHRAX EDEMA FACTOR (EF) TRUNCATION MUTANT, EF-DELTA 64 IN COMPI  |
| 1XG2        | A B                 | B        | CRYSTAL STRUCTURE OF THE COMPLEX BETWEEN PECTIN METHYLESTERASE AND ITS INHIBITOR PRO    |
| 1XIU        | A E                 | A        | CRYSTAL STRUCTURE OF THE AGONIST-BOUND LIGAND-BINDING DOMAIN OF BIOMPHALARIA GLABRA     |
| 1XL3        | A C                 | C        | COMPLEX STRUCTURE OF Y.PESTIS VIRULENCE FACTORS YOPN AND TYEA                           |
| 1XLS        | A E                 | A        | CRYSTAL STRUCTURE OF THE MOUSE CAR/RXR LBD HETERODIMER BOUND TO TCPOBOP AND 9CRA AN     |
| 1XLS        | A E                 | E        | CRYSTAL STRUCTURE OF THE MOUSE CAR/RXR LBD HETERODIMER BOUND TO TCPOBOP AND 9CRA AN     |
| 1XLS        | A I                 | I        | CRYSTAL STRUCTURE OF THE MOUSE CAR/RXR LBD HETERODIMER BOUND TO TCPOBOP AND 9CRA AN     |
| 1XLS        | D L                 | L        | CRYSTAL STRUCTURE OF THE MOUSE CAR/RXR LBD HETERODIMER BOUND TO TCPOBOP AND 9CRA AN     |
| 1XLS        | E M                 | E        | CRYSTAL STRUCTURE OF THE MOUSE CAR/RXR LBD HETERODIMER BOUND TO TCPOBOP AND 9CRA AN     |
| 1XLS        | F N                 | N        | CRYSTAL STRUCTURE OF THE MOUSE CAR/RXR LBD HETERODIMER BOUND TO TCPOBOP AND 9CRA AN     |
| 1XLS        | H P                 | P        | CRYSTAL STRUCTURE OF THE MOUSE CAR/RXR LBD HETERODIMER BOUND TO TCPOBOP AND 9CRA AN     |
| 1XOU        | A B                 | A        | CRYSTAL STRUCTURE OF THE CESA-ESPA COMPLEX                                              |
| 1XOU        | A B                 | A        | CRYSTAL STRUCTURE OF THE CESA-ESPA COMPLEX                                              |
| 1XOU        | A B                 | A        | CRYSTAL STRUCTURE OF THE CESA-ESPA COMPLEX                                              |
| 1XOU        | A B                 | B        | CRYSTAL STRUCTURE OF THE CESA-ESPA COMPLEX                                              |
| 1XOU        | A B                 | B        | CRYSTAL STRUCTURE OF THE CESA-ESPA COMPLEX                                              |
| 1XPK        | D C                 | C        | CRYSTAL STRUCTURE OF STAPHYLOCOCCUS AUREUS HMG-COA SYNTHASE WITH HMG-COA AND WITH       |
| 1XPK        | D C                 | D        | CRYSTAL STRUCTURE OF STAPHYLOCOCCUS AUREUS HMG-COA SYNTHASE WITH HMG-COA AND WITH       |
| 1XQ5        | A D                 | D        | MET-PERCH HEMOGLOBIN AT 1.9A                                                            |
| 1XQ5        | C D                 | C        | MET-PERCH HEMOGLOBIN AT 1.9A                                                            |
| 1XQ5        | C D                 | D        | MET-PERCH HEMOGLOBIN AT 1.9A                                                            |
| 1XQS        | A C                 | A        | CRYSTAL STRUCTURE OF THE HSPBP1 CORE DOMAIN COMPLEXED WITH THE FRAGMENT OF HSP70 ATP.   |
| 1XQS        | A C                 | C        | CRYSTAL STRUCTURE OF THE HSPBP1 CORE DOMAIN COMPLEXED WITH THE FRAGMENT OF HSP70 ATP.   |
| 1XQS        | B D                 | D        | CRYSTAL STRUCTURE OF THE HSPBP1 CORE DOMAIN COMPLEXED WITH THE FRAGMENT OF HSP70 ATP.   |
| 1XQS        | B D                 | D        | CRYSTAL STRUCTURE OF THE HSPBP1 CORE DOMAIN COMPLEXED WITH THE FRAGMENT OF HSP70 ATP.   |
| 1XTG        | A B                 | A        | CRYSTAL STRUCTURE OF NEUROTOXIN BONT/A COMPLEXED WITH SYNAPTOSOMAL-ASSOCIATED PRO       |
| 1XTG        | A B                 | A        | CRYSTAL STRUCTURE OF NEUROTOXIN BONT/A COMPLEXED WITH SYNAPTOSOMAL-ASSOCIATED PRO       |
| 1XTG        | A B                 | B        | CRYSTAL STRUCTURE OF NEUROTOXIN BONT/A COMPLEXED WITH SYNAPTOSOMAL-ASSOCIATED PRO       |
| 1XV9        | A B                 | B        | CRYSTAL STRUCTURE OF CAR/RXR HETERODIMER BOUND WITH SRC1 PEPTIDE, FATTY ACID, AND 5B-PF |
| 1XV9        | A B                 | B        | CRYSTAL STRUCTURE OF CAR/RXR HETERODIMER BOUND WITH SRC1 PEPTIDE, FATTY ACID, AND 5B-PF |
| 1XV9        | C D                 | C        | CRYSTAL STRUCTURE OF CAR/RXR HETERODIMER BOUND WITH SRC1 PEPTIDE, FATTY ACID, AND 5B-PF |
| 1XV9        | C G                 | C        | CRYSTAL STRUCTURE OF CAR/RXR HETERODIMER BOUND WITH SRC1 PEPTIDE, FATTY ACID, AND 5B-PF |
| 1XZP        | A B                 | A        | STRUCTURE OF THE GTP-BINDING PROTEIN TRME FROM THERMOTOGA MARITIMA                      |
| 1XZP        | A B                 | B        | STRUCTURE OF THE GTP-BINDING PROTEIN TRME FROM THERMOTOGA MARITIMA                      |
| 1Y74        | A D                 | A        | SOLUTION STRUCTURE OF MLIN-2/MLIN-7 L27 DOMAIN COMPLEX                                  |
| 1Y76        | C B                 | C        | SOLUTION STRUCTURE OF PATJ/PALS1 L27 DOMAIN COMPLEX                                     |
| 1Y8R        | A B                 | A        | SUMO E1 ACTIVATING ENZYME SAE1-SAE2-SUMO1-MG-ATP COMPLEX                                |
| 1Y8R        | A B                 | A        | SUMO E1 ACTIVATING ENZYME SAE1-SAE2-SUMO1-MG-ATP COMPLEX                                |
| 1Y8R        | A B                 | B        | SUMO E1 ACTIVATING ENZYME SAE1-SAE2-SUMO1-MG-ATP COMPLEX                                |
| 1Y8R        | A B                 | B        | SUMO E1 ACTIVATING ENZYME SAE1-SAE2-SUMO1-MG-ATP COMPLEX                                |
| 1Y8R        | D E                 | D        | SUMO E1 ACTIVATING ENZYME SAE1-SAE2-SUMO1-MG-ATP COMPLEX                                |
| 1Y8R        | D E                 | D        | SUMO E1 ACTIVATING ENZYME SAE1-SAE2-SUMO1-MG-ATP COMPLEX                                |
| 1Y8R        | D E                 | E        | SUMO E1 ACTIVATING ENZYME SAE1-SAE2-SUMO1-MG-ATP COMPLEX                                |
| 1Y8X        | A B                 | B        | STRUCTURAL BASIS FOR RECRUITMENT OF UBC12 BY AN E2-BINDING DOMAIN IN NEDD8'S E1         |
| 1YD8        | U H                 | H        | COMPLEX OF HUMAN GGA3 GAT DOMAIN AND UBIQUITIN                                          |
| 1YD8        | V G                 | G        | COMPLEX OF HUMAN GGA3 GAT DOMAIN AND UBIQUITIN                                          |
| 1YDI        | A B                 | A        | HUMAN VINCULIN HEAD DOMAIN (VH1, 1-258) IN COMPLEX WITH HUMAN ALPHA-ACTININ'S VINCULIN  |
| 1YDI        | A B                 | A        | HUMAN VINCULIN HEAD DOMAIN (VH1, 1-258) IN COMPLEX WITH HUMAN ALPHA-ACTININ'S VINCULIN  |
| 1YKE        | A B                 | A        | STRUCTURE OF THE MEDIATOR MED7/MED21 SUBCOMPLEX                                         |
| 1YKE        | A B                 | A        | STRUCTURE OF THE MEDIATOR MED7/MED21 SUBCOMPLEX                                         |
| 1YKE        | A B                 | A        | STRUCTURE OF THE MEDIATOR MED7/MED21 SUBCOMPLEX                                         |
| 1YKE        | A B                 | B        | STRUCTURE OF THE MEDIATOR MED7/MED21 SUBCOMPLEX                                         |
| 1YKE        | A B                 | B        | STRUCTURE OF THE MEDIATOR MED7/MED21 SUBCOMPLEX                                         |
| 1YKE        | C D                 | C        | STRUCTURE OF THE MEDIATOR MED7/MED21 SUBCOMPLEX                                         |
| 1YKE        | C D                 | C        | STRUCTURE OF THE MEDIATOR MED7/MED21 SUBCOMPLEX                                         |
| 1YKE        | C D                 | D        | STRUCTURE OF THE MEDIATOR MED7/MED21 SUBCOMPLEX                                         |
| 1YOK        | A B                 | A        | CRYSTAL STRUCTURE OF HUMAN LRH-1 BOUND WITH TIF-2 PEPTIDE AND PHOSPHATIDYLGLYCEROL      |
| 1YOV        | A B                 | A        | INSIGHTS INTO THE UBIQUITIN TRANSFER CASCADE FROM THE REFINED STRUCTURE OF THE ACTIVAT  |

TABLE S4

Jochim, et al

| A. PDB<br>CODE | E. FUNCTION                            | F. $\Delta\Delta G_{AVG,HELIX}$<br>(KCAL/MOL) | G. $\Delta\Delta G_{SUM,HELIX}$<br>(KCAL/MOL) | H. # HOTSPOT<br>RESIDUES | I. HELIX<br>LENGTH |
|----------------|----------------------------------------|-----------------------------------------------|-----------------------------------------------|--------------------------|--------------------|
| 1XFU           | LYASE/METAL BINDING PROTEIN            | 1.3                                           | 2.6                                           | 2                        | 15                 |
| 1XFU           | LYASE/METAL BINDING PROTEIN            | 1.2                                           | 3.7                                           | 3                        | 13                 |
| 1XFU           | LYASE/METAL BINDING PROTEIN            | 1.6                                           | 3.2                                           | 2                        | 23                 |
| 1XFU           | LYASE/METAL BINDING PROTEIN            | 1.3                                           | 2.5                                           | 2                        | 10                 |
| 1XFU           | LYASE/METAL BINDING PROTEIN            | 1.6                                           | 3.2                                           | 2                        | 13                 |
| 1XFU           | LYASE/METAL BINDING PROTEIN            | 1.4                                           | 2.7                                           | 2                        | 9                  |
| 1XG2           | HYDROLASE/HYDROLASE INHIBITOR          | 1.8                                           | 11.0                                          | 6                        | 22                 |
| 1XIU           | TRANSCRIPTION/TRANSFERASE              | 1.6                                           | 6.5                                           | 4                        | 24                 |
| 1XL3           | CELL INVASION                          | 1.6                                           | 6.5                                           | 4                        | 13                 |
| 1XLS           | TRANSCRIPTION                          | 1.5                                           | 2.9                                           | 2                        | 23                 |
| 1XLS           | TRANSCRIPTION                          | 1.7                                           | 3.3                                           | 2                        | 25                 |
| 1XLS           | TRANSCRIPTION                          | 1.5                                           | 4.6                                           | 3                        | 7                  |
| 1XLS           | TRANSCRIPTION                          | 1.2                                           | 2.3                                           | 2                        | 7                  |
| 1XLS           | TRANSCRIPTION                          | 1.5                                           | 4.5                                           | 3                        | 7                  |
| 1XLS           | TRANSCRIPTION                          | 1.3                                           | 2.6                                           | 2                        | 9                  |
| 1XLS           | TRANSCRIPTION                          | 1.9                                           | 9.4                                           | 5                        | 9                  |
| 1XOU           | STRUCTURAL PROTEIN/CHAPERONE           | 1.8                                           | 7.0                                           | 4                        | 13                 |
| 1XOU           | STRUCTURAL PROTEIN/CHAPERONE           | 1.9                                           | 5.7                                           | 3                        | 12                 |
| 1XOU           | STRUCTURAL PROTEIN/CHAPERONE           | 1.3                                           | 2.5                                           | 2                        | 11                 |
| 1XOU           | STRUCTURAL PROTEIN/CHAPERONE           | 1.4                                           | 8.4                                           | 6                        | 19                 |
| 1XOU           | STRUCTURAL PROTEIN/CHAPERONE           | 1.9                                           | 13.1                                          | 7                        | 29                 |
| 1XPK           | TRANSFERASE                            | 1.5                                           | 3.0                                           | 2                        | 16                 |
| 1XPK           | TRANSFERASE                            | 1.5                                           | 3.0                                           | 2                        | 15                 |
| 1XQ5           | OXYGEN STORAGE/TRANSPORT               | 1.5                                           | 3.0                                           | 2                        | 7                  |
| 1XQ5           | OXYGEN STORAGE/TRANSPORT               | 1.3                                           | 2.6                                           | 2                        | 19                 |
| 1XQ5           | OXYGEN STORAGE/TRANSPORT               | 1.8                                           | 5.3                                           | 3                        | 16                 |
| 1XQS           | CHAPERONE                              | 1.3                                           | 2.5                                           | 2                        | 18                 |
| 1XQS           | CHAPERONE                              | 1.9                                           | 5.6                                           | 3                        | 20                 |
| 1XQS           | CHAPERONE                              | 1.4                                           | 2.7                                           | 2                        | 20                 |
| 1XQS           | CHAPERONE                              | 1.5                                           | 2.9                                           | 2                        | 18                 |
| 1XTG           | TOXIN                                  | 1.6                                           | 3.1                                           | 2                        | 13                 |
| 1XTG           | TOXIN                                  | 1.1                                           | 3.2                                           | 3                        | 15                 |
| 1XTG           | TOXIN                                  | 1.8                                           | 7.2                                           | 4                        | 20                 |
| 1XV9           | DNA BINDING PROTEIN                    | 1.7                                           | 3.4                                           | 2                        | 23                 |
| 1XV9           | DNA BINDING PROTEIN                    | 1.3                                           | 2.5                                           | 2                        | 18                 |
| 1XV9           | DNA BINDING PROTEIN                    | 1.2                                           | 3.6                                           | 3                        | 29                 |
| 1XV9           | DNA BINDING PROTEIN                    | 1.2                                           | 2.3                                           | 2                        | 10                 |
| 1XZP           | HYDROLASE                              | 1.5                                           | 3.0                                           | 2                        | 12                 |
| 1XZP           | HYDROLASE                              | 1.8                                           | 3.6                                           | 2                        | 14                 |
| 1Y74           | TRANSPORT PROTEIN                      | 1.4                                           | 2.7                                           | 2                        | 20                 |
| 1Y76           | TRANSPORT PROTEIN                      | 1.2                                           | 3.5                                           | 3                        | 20                 |
| 1Y8R           | LIGASE                                 | 1.2                                           | 3.7                                           | 3                        | 20                 |
| 1Y8R           | LIGASE                                 | 1.3                                           | 2.6                                           | 2                        | 14                 |
| 1Y8R           | LIGASE                                 | 1.9                                           | 3.7                                           | 2                        | 20                 |
| 1Y8R           | LIGASE                                 | 1.7                                           | 3.4                                           | 2                        | 14                 |
| 1Y8R           | LIGASE                                 | 1.9                                           | 3.7                                           | 2                        | 21                 |
| 1Y8R           | LIGASE                                 | 1.4                                           | 2.8                                           | 2                        | 14                 |
| 1Y8R           | LIGASE                                 | 1.8                                           | 3.6                                           | 2                        | 21                 |
| 1Y8X           | LIGASE                                 | 1.5                                           | 3.0                                           | 2                        | 6                  |
| 1YD8           | PROTEIN TRANSPORT, CHROMOSOMAL PROTEIN | 1.2                                           | 2.4                                           | 2                        | 25                 |
| 1YD8           | PROTEIN TRANSPORT, CHROMOSOMAL PROTEIN | 1.6                                           | 3.1                                           | 2                        | 25                 |
| 1YDI           | CELL ADHESION, STRUCTURAL PROTEIN      | 1.5                                           | 4.4                                           | 3                        | 25                 |
| 1YDI           | CELL ADHESION, STRUCTURAL PROTEIN      | 1.1                                           | 3.4                                           | 3                        | 49                 |
| 1YKE           | GENE REGULATION                        | 1.4                                           | 4.2                                           | 3                        | 22                 |
| 1YKE           | GENE REGULATION                        | 1.6                                           | 6.2                                           | 4                        | 39                 |
| 1YKE           | GENE REGULATION                        | 1.9                                           | 5.7                                           | 3                        | 24                 |
| 1YKE           | GENE REGULATION                        | 1.3                                           | 5.0                                           | 4                        | 42                 |
| 1YKE           | GENE REGULATION                        | 1.5                                           | 3.0                                           | 2                        | 16                 |
| 1YKE           | GENE REGULATION                        | 1.7                                           | 5.0                                           | 3                        | 22                 |
| 1YKE           | GENE REGULATION                        | 1.8                                           | 10.7                                          | 6                        | 39                 |
| 1YKE           | GENE REGULATION                        | 1.0                                           | 2.0                                           | 2                        | 10                 |
| 1YOK           | TRANSCRIPTION                          | 1.4                                           | 2.7                                           | 2                        | 22                 |
| 1YOV           | SIGNALING PROTEIN                      | 1.2                                           | 4.8                                           | 4                        | 21                 |

TABLE S4

Jochim, et al

| A. PDB<br>CODE | J. HELIX START<br>RESIDUE # | K. HELIX END<br>RESIDUE # |
|----------------|-----------------------------|---------------------------|
| 1XFU           | 522                         | 536                       |
| 1XFU           | 81                          | 93                        |
| 1XFU           | 715                         | 737                       |
| 1XFU           | 138                         | 147                       |
| 1XFU           | 660                         | 672                       |
| 1XFU           | 121                         | 129                       |
| 1XG2           | 97                          | 118                       |
| 1XIU           | 268                         | 291                       |
| 1XL3           | 5                           | 17                        |
| 1XLS           | 386                         | 408                       |
| 1XLS           | 318                         | 342                       |
| 1XLS           | 743                         | 749                       |
| 1XLS           | 743                         | 749                       |
| 1XLS           | 351                         | 357                       |
| 1XLS           | 743                         | 751                       |
| 1XLS           | 743                         | 751                       |
| 1XOU           | 35                          | 47                        |
| 1XOU           | 165                         | 176                       |
| 1XOU           | 179                         | 189                       |
| 1XOU           | 66                          | 84                        |
| 1XOU           | 3                           | 31                        |
| 1XPK           | 112                         | 127                       |
| 1XPK           | 113                         | 127                       |
| 1XQ5           | 36                          | 42                        |
| 1XQ5           | 96                          | 114                       |
| 1XQ5           | 20                          | 35                        |
| 1XQS           | 244                         | 261                       |
| 1XQS           | 230                         | 249                       |
| 1XQS           | 230                         | 249                       |
| 1XQS           | 257                         | 274                       |
| 1XTG           | 102                         | 114                       |
| 1XTG           | 335                         | 349                       |
| 1XTG           | 148                         | 167                       |
| 1XV9           | 308                         | 330                       |
| 1XV9           | 236                         | 253                       |
| 1XV9           | 414                         | 442                       |
| 1XV9           | 294                         | 303                       |
| 1XZP           | 135                         | 146                       |
| 1XZP           | 85                          | 98                        |
| 1Y74           | 54                          | 73                        |
| 1Y76           | 45                          | 64                        |
| 1Y8R           | 300                         | 319                       |
| 1Y8R           | 46                          | 59                        |
| 1Y8R           | 388                         | 407                       |
| 1Y8R           | 27                          | 40                        |
| 1Y8R           | 300                         | 320                       |
| 1Y8R           | 46                          | 59                        |
| 1Y8R           | 388                         | 408                       |
| 1Y8X           | 398                         | 403                       |
| 1YD8           | 210                         | 234                       |
| 1YD8           | 210                         | 234                       |
| 1YDI           | 41                          | 65                        |
| 1YDI           | 102                         | 150                       |
| 1YKE           | 143                         | 164                       |
| 1YKE           | 166                         | 204                       |
| 1YKE           | 112                         | 135                       |
| 1YKE           | 87                          | 128                       |
| 1YKE           | 4                           | 19                        |
| 1YKE           | 141                         | 162                       |
| 1YKE           | 165                         | 203                       |
| 1YKE           | 97                          | 106                       |
| 1YOK           | 341                         | 362                       |
| 1YOV           | 491                         | 511                       |

| A. PDB<br>CODE | L. HELIX SEQUENCE                                |
|----------------|--------------------------------------------------|
| 1XFU           | SLEKQKGVTNLLIKY                                  |
| 1XFU           | SEEEIREAFRVFD                                    |
| 1XFU           | EKKRKISIFRGIQAYNEIENVLK                          |
| 1XFU           | YEEFVQMMTA                                       |
| 1XFU           | SAEFIKNLSSIRR                                    |
| 1XFU           | VDQMIREAD                                        |
| 1XG2           | YNSLNIYASAAFDGAGTCEDSF                           |
| 1XIU           | LEDQVILLRAGWNELLIAGFSHRS                         |
| 1XL3           | LSEFMGDIVALVD                                    |
| 1XLS           | PAEVEALREKVYASLEAYCKHKY                          |
| 1XLS           | LYAKLMGLLADLRSINNAYSVELQR                        |
| 1XLS           | ALLRYLL                                          |
| 1XLS           | ALLRYLL                                          |
| 1XLS           | PLLGEIC                                          |
| 1XLS           | ALLRYLLDK                                        |
| 1XLS           | ALLRYLLDK                                        |
| 1XOU           | LFNKLGVFQAAIL                                    |
| 1XOU           | NTLNLLTSARSD                                     |
| 1XOU           | SLQYRTISGIS                                      |
| 1XOU           | EERKLYDSALSKEKLIET                               |
| 1XOU           | IVSQTRNKELLDKKIRSEIEAIKKHIAEF                    |
| 1XPK           | YAATPAIQLAKDYLAT                                 |
| 1XPK           | AATPAIQLAKDYLAT                                  |
| 1XQ5           | PWTQRYF                                          |
| 1XQ5           | PANFKILSHCILVLLAVKF                              |
| 1XQ5           | YEAVGGATLARCLIVY                                 |
| 1XQS           | QKLKVKSAFLLQNLVGH                                |
| 1XQS           | GEDFDNRLVNHVVEEFKRKH                             |
| 1XQS           | GEDFDNRLVNHVVEEFKRKH                             |
| 1XQS           | KRAVRRRLTACERAKRTL                               |
| 1XTG           | DLGRMLLTSIVRG                                    |
| 1XTG           | KLKFDKLYKMLTEIY                                  |
| 1XTG           | ENLEQVSGHGNLRHMALDM                              |
| 1XV9           | LYAKLLGLLAELRSINEAYGYQI                          |
| 1XV9           | VEFLELLFHFHGTLRKQL                               |
| 1XV9           | RFKLLLRPALRSIGLKCLEHLFFFKLI                      |
| 1XV9           | LDDQVILLRA                                       |
| 1XZP           | ETSLKLSLRNLK                                     |
| 1XZP           | PLVVKKLLDLFLKS                                   |
| 1Y74           | RFCSAIREVYEQLYDTLDIT                             |
| 1Y76           | PLFNQILTQQSIKQLKGQL                              |
| 1Y8R           | APVCAVVGILAQEIVKALS                              |
| 1Y8R           | GLGAEIAKNLILAG                                   |
| 1Y8R           | ATTNAVIAGLIVLEGLKILS                             |
| 1Y8R           | GIGCELLKNLVLTG                                   |
| 1Y8R           | APVCAVVGILAQEIVKALSQ                             |
| 1Y8R           | GLGAEIAKNLILAG                                   |
| 1Y8R           | ATTNAVIAGLIVLEGLKILSG                            |
| 1Y8X           | TSIEER                                           |
| 1YD8           | KVTKRLHTLEEVENNVRLLEMLLH                         |
| 1YD8           | KVTKRLHTLEEVENNVRLLEMLLH                         |
| 1YDI           | TAPVAAVQAASNLVRVGKETVQTT                         |
| 1YDI           | VPARDYLIDGSRGILSGTSDLLTFDEAEVRKIIRVCKGILEYLTVAEV |
| 1YKE           | MYERKVENIRTILVNIHLLNE                            |
| 1YKE           | RPHQSRESLIMLLEEQLLEYKRGEIREIEQVCKQVHDKLT         |
| 1YKE           | YQYKIQLRKLKLSLLNYLELIG                           |
| 1YKE           | AEEQLRKIDMLQKKLVEVEDEKIEAIKKKEKLLRHVDSLIED       |
| 1YKE           | RTLQLQICLDQMTEQF                                 |
| 1YKE           | PDMYERKVENIRTILVNIHLL                            |
| 1YKE           | YRPHQSRESLIMLLEEQLLEYKRGEIREIEQVCKQVHDKL         |
| 1YKE           | LQKKLVEVED                                       |
| 1YOK           | TFGLMCKMADQTLFSIVEWARS                           |
| 1YOV           | HTIAAFLGAAAQEVIKIITK                             |



| A. PDB<br>CODE | M. RESOLUTION |
|----------------|---------------|
| 1XFU           | 3.35          |
| 1XFU           | 3.35          |
| 1XFU           | 3.35          |
| 1XFU           | 3.35          |
| 1XFU           | 3.35          |
| 1XG2           | 1.9           |
| 1XIU           | 2.5           |
| 1XL3           | 2.2           |
| 1XLS           | 2.96          |
| 1XLS           | 2.96          |
| 1XLS           | 2.96          |
| 1XLS           | 2.96          |
| 1XLS           | 2.96          |
| 1XLS           | 2.96          |
| 1XLS           | 2.96          |
| 1XOU           | 2.8           |
| 1XOU           | 2.8           |
| 1XOU           | 2.8           |
| 1XOU           | 2.8           |
| 1XOU           | 2.8           |
| 1XPK           | 2             |
| 1XPK           | 2             |
| 1XQ5           | 1.9           |
| 1XQ5           | 1.9           |
| 1XQ5           | 1.9           |
| 1XQS           | 2.9           |
| 1XQS           | 2.9           |
| 1XQS           | 2.9           |
| 1XQS           | 2.9           |
| 1XQS           | 2.9           |
| 1XTG           | 2.1           |
| 1XTG           | 2.1           |
| 1XTG           | 2.1           |
| 1XV9           | 2.7           |
| 1XV9           | 2.7           |
| 1XV9           | 2.7           |
| 1XV9           | 2.7           |
| 1XZP           | 2.3           |
| 1XZP           | 2.3           |
| 1Y74           | NOT APP       |
| 1Y76           | NOT APP       |
| 1Y8R           | 2.75          |
| 1Y8R           | 2.75          |
| 1Y8R           | 2.75          |
| 1Y8R           | 2.75          |
| 1Y8R           | 2.75          |
| 1Y8R           | 2.75          |
| 1Y8R           | 2.75          |
| 1Y8R           | 2.75          |
| 1Y8X           | 2.4           |
| 1YD8           | 2.8           |
| 1YD8           | 2.8           |
| 1YDI           | 1.8           |
| 1YDI           | 1.8           |
| 1YKE           | 3.3           |
| 1YKE           | 3.3           |
| 1YKE           | 3.3           |
| 1YKE           | 3.3           |
| 1YKE           | 3.3           |
| 1YKE           | 3.3           |
| 1YKE           | 3.3           |
| 1YKE           | 3.3           |
| 1YKE           | 3.3           |
| 1YKE           | 3.3           |
| 1YOK           | 2.5           |
| 1YOV           | 2.6           |

| A. PDB CODE | B. INTERFACE CHAINS | C. CHAIN | D. TITLE                                                                               |
|-------------|---------------------|----------|----------------------------------------------------------------------------------------|
| 1YOV        | AB                  | A        | INSIGHTS INTO THE UBIQUITIN TRANSFER CASCADE FROM THE REFINED STRUCTURE OF THE ACTIVAT |
| 1YOV        | AB                  | A        | INSIGHTS INTO THE UBIQUITIN TRANSFER CASCADE FROM THE REFINED STRUCTURE OF THE ACTIVAT |
| 1YOV        | AB                  | B        | INSIGHTS INTO THE UBIQUITIN TRANSFER CASCADE FROM THE REFINED STRUCTURE OF THE ACTIVAT |
| 1YOV        | AB                  | B        | INSIGHTS INTO THE UBIQUITIN TRANSFER CASCADE FROM THE REFINED STRUCTURE OF THE ACTIVAT |
| 1YOV        | CD                  | C        | INSIGHTS INTO THE UBIQUITIN TRANSFER CASCADE FROM THE REFINED STRUCTURE OF THE ACTIVAT |
| 1YOV        | CD                  | C        | INSIGHTS INTO THE UBIQUITIN TRANSFER CASCADE FROM THE REFINED STRUCTURE OF THE ACTIVAT |
| 1YOV        | CD                  | C        | INSIGHTS INTO THE UBIQUITIN TRANSFER CASCADE FROM THE REFINED STRUCTURE OF THE ACTIVAT |
| 1YOV        | CD                  | D        | INSIGHTS INTO THE UBIQUITIN TRANSFER CASCADE FROM THE REFINED STRUCTURE OF THE ACTIVAT |
| 1YOV        | CD                  | D        | INSIGHTS INTO THE UBIQUITIN TRANSFER CASCADE FROM THE REFINED STRUCTURE OF THE ACTIVAT |
| 1YQ3        | AB                  | A        | AVIAN RESPIRATORY COMPLEX II WITH OXALOACETATE AND UBIQUINONE                          |
| 1YQ3        | BD                  | B        | AVIAN RESPIRATORY COMPLEX II WITH OXALOACETATE AND UBIQUINONE                          |
| 1YQ3        | CD                  | C        | AVIAN RESPIRATORY COMPLEX II WITH OXALOACETATE AND UBIQUINONE                          |
| 1YQ3        | CD                  | C        | AVIAN RESPIRATORY COMPLEX II WITH OXALOACETATE AND UBIQUINONE                          |
| 1YQ3        | CD                  | D        | AVIAN RESPIRATORY COMPLEX II WITH OXALOACETATE AND UBIQUINONE                          |
| 1YQ3        | CD                  | D        | AVIAN RESPIRATORY COMPLEX II WITH OXALOACETATE AND UBIQUINONE                          |
| 1YR5        | AB                  | B        | 1.7-A STRUCTURE OF CALMODULIN BOUND TO A PEPTIDE FROM DAP KINASE                       |
| 1YUC        | AC                  | A        | HUMAN NUCLEAR RECEPTOR LIVER RECEPTOR HOMOLOGUE-1, LRH-1, BOUND TO PHOSPHOLIPID AND    |
| 1YUC        | AC                  | C        | HUMAN NUCLEAR RECEPTOR LIVER RECEPTOR HOMOLOGUE-1, LRH-1, BOUND TO PHOSPHOLIPID AND    |
| 1YUC        | BD                  | B        | HUMAN NUCLEAR RECEPTOR LIVER RECEPTOR HOMOLOGUE-1, LRH-1, BOUND TO PHOSPHOLIPID AND    |
| 1YUC        | BD                  | D        | HUMAN NUCLEAR RECEPTOR LIVER RECEPTOR HOMOLOGUE-1, LRH-1, BOUND TO PHOSPHOLIPID AND    |
| 1Z00        | AB                  | A        | SOLUTION STRUCTURE OF THE C-TERMINAL DOMAIN OF ERCC1 COMPLEXED WITH THE C-TERMINAL C   |
| 1Z00        | AB                  | A        | SOLUTION STRUCTURE OF THE C-TERMINAL DOMAIN OF ERCC1 COMPLEXED WITH THE C-TERMINAL C   |
| 1Z0J        | AB                  | B        | STRUCTURE OF GTP-BOUND RAB22Q64L GTPASE IN COMPLEX WITH THE MINIMAL RAB BINDING DOMA   |
| 1Z0J        | AB                  | B        | STRUCTURE OF GTP-BOUND RAB22Q64L GTPASE IN COMPLEX WITH THE MINIMAL RAB BINDING DOMA   |
| 1Z0K        | AB                  | B        | STRUCTURE OF GTP-BOUND RAB4Q67L GTPASE IN COMPLEX WITH THE CENTRAL RAB BINDING DOMAI   |
| 1Z0K        | CD                  | D        | STRUCTURE OF GTP-BOUND RAB4Q67L GTPASE IN COMPLEX WITH THE CENTRAL RAB BINDING DOMAI   |
| 1Z2C        | AB                  | A        | CRYSTAL STRUCTURE OF MDIA1 GBD-FH3 IN COMPLEX WITH RHOC- GMPPNP                        |
| 1Z2C        | AB                  | B        | CRYSTAL STRUCTURE OF MDIA1 GBD-FH3 IN COMPLEX WITH RHOC- GMPPNP                        |
| 1Z2C        | CD                  | C        | CRYSTAL STRUCTURE OF MDIA1 GBD-FH3 IN COMPLEX WITH RHOC- GMPPNP                        |
| 1Z5S        | AC                  | A        | CRYSTAL STRUCTURE OF A COMPLEX BETWEEN UBC9, SUMO-1, RANGAP1 AND NUP358/RANBP2         |
| 1Z5S        | AD                  | A        | CRYSTAL STRUCTURE OF A COMPLEX BETWEEN UBC9, SUMO-1, RANGAP1 AND NUP358/RANBP2         |
| 1Z5X        | UE                  | E        | HEMIPTERAN ECDYSONE RECEPTOR LIGAND-BINDING DOMAIN COMPLEXED WITH PONAESTERONE A       |
| 1Z5X        | UE                  | U        | HEMIPTERAN ECDYSONE RECEPTOR LIGAND-BINDING DOMAIN COMPLEXED WITH PONAESTERONE A       |
| 1Z7M        | BG                  | G        | ATP PHOSPHORIBOSYL TRANSFERASE (HISZG ATP-PRASE) FROM LACTOCOCCUS LACTIS               |
| 1Z8U        | AB                  | A        | CRYSTAL STRUCTURE OF OXIDIZED ALPHA HEMOGLOBIN BOUND TO AHSP                           |
| 1Z8U        | AB                  | B        | CRYSTAL STRUCTURE OF OXIDIZED ALPHA HEMOGLOBIN BOUND TO AHSP                           |
| 1Z92        | AB                  | A        | STRUCTURE OF INTERLEUKIN-2 WITH ITS ALPHA RECEPTOR                                     |
| 1ZAV        | AU                  | A        | RIBOSOMAL PROTEIN L10-L12(NTD) COMPLEX, SPACE GROUP P21                                |
| 1ZAV        | AU                  | U        | RIBOSOMAL PROTEIN L10-L12(NTD) COMPLEX, SPACE GROUP P21                                |
| 1ZAV        | AV                  | A        | RIBOSOMAL PROTEIN L10-L12(NTD) COMPLEX, SPACE GROUP P21                                |
| 1ZAV        | AV                  | V        | RIBOSOMAL PROTEIN L10-L12(NTD) COMPLEX, SPACE GROUP P21                                |
| 1ZAV        | AW                  | A        | RIBOSOMAL PROTEIN L10-L12(NTD) COMPLEX, SPACE GROUP P21                                |
| 1ZAV        | AW                  | W        | RIBOSOMAL PROTEIN L10-L12(NTD) COMPLEX, SPACE GROUP P21                                |
| 1ZAV        | AX                  | A        | RIBOSOMAL PROTEIN L10-L12(NTD) COMPLEX, SPACE GROUP P21                                |
| 1ZAV        | AX                  | X        | RIBOSOMAL PROTEIN L10-L12(NTD) COMPLEX, SPACE GROUP P21                                |
| 1ZAV        | AY                  | A        | RIBOSOMAL PROTEIN L10-L12(NTD) COMPLEX, SPACE GROUP P21                                |
| 1ZAV        | AZ                  | A        | RIBOSOMAL PROTEIN L10-L12(NTD) COMPLEX, SPACE GROUP P21                                |
| 1ZAV        | AZ                  | Z        | RIBOSOMAL PROTEIN L10-L12(NTD) COMPLEX, SPACE GROUP P21                                |
| 1ZC4        | CB                  | B        | CRYSTAL STRUCTURE OF THE RAL-BINDING DOMAIN OF EXO84 IN COMPLEX WITH THE ACTIVE RALA   |
| 1ZDT        | AP                  | A        | THE CRYSTAL STRUCTURE OF HUMAN STEROIDOGENIC FACTOR-1                                  |
| 1ZE3        | CD                  | C        | CRYSTAL STRUCTURE OF THE TERNARY COMPLEX OF FIMD (N- TERMINAL DOMAIN) WITH FIMC AND TI |
| 1ZE3        | CD                  | D        | CRYSTAL STRUCTURE OF THE TERNARY COMPLEX OF FIMD (N- TERMINAL DOMAIN) WITH FIMC AND TI |
| 1ZHI        | AB                  | A        | COMPLEX OF THE S. CEREVISIAE ORC1 AND SIR1 INTERACTING DOMAINS                         |
| 1ZM2        | AB                  | A        | STRUCTURE OF ADP-RIBOSYLATED EEF2 IN COMPLEX WITH CATALYTIC FRAGMENT OF ETA            |
| 1ZNV        | AB                  | A        | HOW A HIS-METAL FINGER ENDONUCLEASE COLE7 BINDS AND CLEAVES DNA WITH A TRANSITION MET  |
| 1ZOQ        | AC                  | C        | IRF3-CBP COMPLEX                                                                       |
| 1ZOQ        | BD                  | B        | IRF3-CBP COMPLEX                                                                       |
| 1ZOQ        | BD                  | B        | IRF3-CBP COMPLEX                                                                       |
| 1ZOQ        | BD                  | D        | IRF3-CBP COMPLEX                                                                       |
| 1ZUZ        | AB                  | A        | CALMODULIN IN COMPLEX WITH A MUTANT PEPTIDE FROM HUMAN DRP- 1 KINASE                   |
| 1ZVV        | AW                  | W        | CRYSTAL STRUCTURE OF A CCPA-CRH-DNA COMPLEX                                            |
| 1ZW3        | AB                  | A        | VINCULIN HEAD (0-258) IN COMPLEX WITH THE TALIN ROD RESIDUES 1630-1652                 |
| 1ZY3        | AB                  | A        | STRUCTURAL MODEL OF COMPLEX OF BCL-W PROTEIN WITH BID BH3- PEPTIDE                     |

TABLE S4

Jochim, et al

| A. PDB<br>CODE | E. FUNCTION                           | F. $\Delta\Delta G_{\text{AVG,HELIX}}$<br>(KCAL/MOL) | G. $\Delta\Delta G_{\text{SUM,HELIX}}$<br>(KCAL/MOL) | H. # HOTSPOT<br>RESIDUES | I. HELIX<br>LENGTH |
|----------------|---------------------------------------|------------------------------------------------------|------------------------------------------------------|--------------------------|--------------------|
| 1YOV           | SIGNALING PROTEIN                     | 1.6                                                  | 3.1                                                  | 2                        | 5                  |
| 1YOV           | SIGNALING PROTEIN                     | 1.1                                                  | 2.2                                                  | 2                        | 32                 |
| 1YOV           | SIGNALING PROTEIN                     | 1.6                                                  | 4.7                                                  | 3                        | 21                 |
| 1YOV           | SIGNALING PROTEIN                     | 1.6                                                  | 3.2                                                  | 2                        | 9                  |
| 1YOV           | SIGNALING PROTEIN                     | 1.6                                                  | 4.8                                                  | 3                        | 7                  |
| 1YOV           | SIGNALING PROTEIN                     | 1.4                                                  | 5.7                                                  | 4                        | 21                 |
| 1YOV           | SIGNALING PROTEIN                     | 1.4                                                  | 2.8                                                  | 2                        | 5                  |
| 1YOV           | SIGNALING PROTEIN                     | 1.5                                                  | 8.9                                                  | 6                        | 21                 |
| 1YOV           | SIGNALING PROTEIN                     | 1.6                                                  | 3.2                                                  | 2                        | 13                 |
| 1YQ3           | OXIDOREDUCTASE                        | 1.6                                                  | 3.2                                                  | 2                        | 15                 |
| 1YQ3           | OXIDOREDUCTASE                        | 1.9                                                  | 3.7                                                  | 2                        | 15                 |
| 1YQ3           | OXIDOREDUCTASE                        | 1.6                                                  | 4.7                                                  | 3                        | 30                 |
| 1YQ3           | OXIDOREDUCTASE                        | 1.4                                                  | 4.2                                                  | 3                        | 30                 |
| 1YQ3           | OXIDOREDUCTASE                        | 1.1                                                  | 2.1                                                  | 2                        | 26                 |
| 1YQ3           | OXIDOREDUCTASE                        | 1.8                                                  | 5.5                                                  | 3                        | 29                 |
| 1YR5           | METAL BINDING PROTEIN/TRANSFERASE     | 1.7                                                  | 11.9                                                 | 7                        | 16                 |
| 1YUC           | TRANSCRIPTION REGULATION              | 1.0                                                  | 3.1                                                  | 3                        | 22                 |
| 1YUC           | TRANSCRIPTION REGULATION              | 1.8                                                  | 7.0                                                  | 4                        | 9                  |
| 1YUC           | TRANSCRIPTION REGULATION              | 1.3                                                  | 2.5                                                  | 2                        | 11                 |
| 1YUC           | TRANSCRIPTION REGULATION              | 1.8                                                  | 3.5                                                  | 2                        | 9                  |
| 1Z00           | HYDROLASE                             | 1.8                                                  | 3.6                                                  | 2                        | 7                  |
| 1Z00           | HYDROLASE                             | 1.3                                                  | 2.5                                                  | 2                        | 17                 |
| 1Z0J           | PROTEIN TRANSPORT                     | 1.4                                                  | 4.3                                                  | 3                        | 21                 |
| 1Z0J           | PROTEIN TRANSPORT                     | 1.4                                                  | 4.3                                                  | 3                        | 22                 |
| 1Z0K           | PROTEIN TRANSPORT                     | 1.5                                                  | 4.6                                                  | 3                        | 19                 |
| 1Z0K           | PROTEIN TRANSPORT                     | 1.4                                                  | 2.8                                                  | 2                        | 23                 |
| 1Z2C           | SIGNALING PROTEIN                     | 1.6                                                  | 3.2                                                  | 2                        | 13                 |
| 1Z2C           | SIGNALING PROTEIN                     | 1.3                                                  | 2.6                                                  | 2                        | 9                  |
| 1Z2C           | SIGNALING PROTEIN                     | 1.5                                                  | 3.0                                                  | 2                        | 7                  |
| 1Z5S           | LIGASE                                | 1.3                                                  | 2.6                                                  | 2                        | 10                 |
| 1Z5S           | LIGASE                                | 1.4                                                  | 2.8                                                  | 2                        | 15                 |
| 1Z5X           | HORMONE/GROWTH FACTOR RECEPTOR        | 1.2                                                  | 3.5                                                  | 3                        | 32                 |
| 1Z5X           | HORMONE/GROWTH FACTOR RECEPTOR        | 1.4                                                  | 2.7                                                  | 2                        | 7                  |
| 1Z7M           | TRANSFERASE                           | 1.5                                                  | 4.4                                                  | 3                        | 6                  |
| 1Z8U           | ELECTRON TRANSPORT                    | 1.7                                                  | 6.8                                                  | 4                        | 19                 |
| 1Z8U           | ELECTRON TRANSPORT                    | 1.3                                                  | 3.8                                                  | 3                        | 12                 |
| 1Z92           | IMMUNE SYSTEM                         | 1.3                                                  | 2.5                                                  | 2                        | 10                 |
| 1ZAV           | STRUCTURAL PROTEIN                    | 1.6                                                  | 7.8                                                  | 5                        | 41                 |
| 1ZAV           | STRUCTURAL PROTEIN                    | 1.9                                                  | 5.7                                                  | 3                        | 16                 |
| 1ZAV           | STRUCTURAL PROTEIN                    | 1.5                                                  | 6.1                                                  | 4                        | 41                 |
| 1ZAV           | STRUCTURAL PROTEIN                    | 1.5                                                  | 5.9                                                  | 4                        | 15                 |
| 1ZAV           | STRUCTURAL PROTEIN                    | 1.3                                                  | 3.8                                                  | 3                        | 41                 |
| 1ZAV           | STRUCTURAL PROTEIN                    | 1.3                                                  | 4.0                                                  | 3                        | 16                 |
| 1ZAV           | STRUCTURAL PROTEIN                    | 1.3                                                  | 2.5                                                  | 2                        | 41                 |
| 1ZAV           | STRUCTURAL PROTEIN                    | 1.4                                                  | 4.1                                                  | 3                        | 15                 |
| 1ZAV           | STRUCTURAL PROTEIN                    | 1.6                                                  | 4.9                                                  | 3                        | 41                 |
| 1ZAV           | STRUCTURAL PROTEIN                    | 1.4                                                  | 2.8                                                  | 2                        | 41                 |
| 1ZAV           | STRUCTURAL PROTEIN                    | 1.2                                                  | 2.4                                                  | 2                        | 13                 |
| 1ZC4           | SIGNALING PROTEIN                     | 1.1                                                  | 2.2                                                  | 2                        | 24                 |
| 1ZDT           | TRANSCRIPTION                         | 1.3                                                  | 2.5                                                  | 2                        | 11                 |
| 1ZE3           | CHAPERONE/STRUCTURAL/MEMBRANE PROTEIN | 1.4                                                  | 2.7                                                  | 2                        | 5                  |
| 1ZE3           | CHAPERONE/STRUCTURAL/MEMBRANE PROTEIN | 1.9                                                  | 3.8                                                  | 2                        | 5                  |
| 1ZHI           | TRANSCRIPTION/REPLICATION             | 1.2                                                  | 2.4                                                  | 2                        | 12                 |
| 1ZM2           | BIOSYNTHETIC PROTEIN/TRANSFERASE      | 1.1                                                  | 2.2                                                  | 2                        | 19                 |
| 1ZNV           | HYDROLASE/PROTEIN BINDING             | 1.4                                                  | 2.7                                                  | 2                        | 6                  |
| 1ZOQ           | TRANSCRIPTION/TRANSFERASE             | 1.7                                                  | 3.4                                                  | 2                        | 12                 |
| 1ZOQ           | TRANSCRIPTION/TRANSFERASE             | 1.3                                                  | 2.5                                                  | 2                        | 13                 |
| 1ZOQ           | TRANSCRIPTION/TRANSFERASE             | 1.9                                                  | 3.7                                                  | 2                        | 13                 |
| 1ZOQ           | TRANSCRIPTION/TRANSFERASE             | 1.4                                                  | 4.2                                                  | 3                        | 13                 |
| 1ZUZ           | METAL BINDING PROTEIN/TRANSFERASE     | 1.9                                                  | 5.7                                                  | 3                        | 10                 |
| 1ZVV           | TRANSCRIPTION/DNA                     | 1.4                                                  | 2.7                                                  | 2                        | 8                  |
| 1ZW3           | PROTEIN BINDING                       | 1.7                                                  | 3.4                                                  | 2                        | 22                 |
| 1ZY3           | APOPTOSIS                             | 1.6                                                  | 4.8                                                  | 3                        | 14                 |

TABLE S4

Jochim, et al

| A. PDB<br>CODE | J. HELIX START<br>RESIDUE # | K. HELIX END<br>RESIDUE # |
|----------------|-----------------------------|---------------------------|
| 1YOV           | 49                          | 53                        |
| 1YOV           | 336                         | 367                       |
| 1YOV           | 293                         | 313                       |
| 1YOV           | 278                         | 286                       |
| 1YOV           | 14                          | 20                        |
| 1YOV           | 491                         | 511                       |
| 1YOV           | 49                          | 53                        |
| 1YOV           | 293                         | 313                       |
| 1YOV           | 103                         | 115                       |
| 1YQ3           | 153                         | 167                       |
| 1YQ3           | 231                         | 245                       |
| 1YQ3           | 34                          | 63                        |
| 1YQ3           | 81                          | 110                       |
| 1YQ3           | 5                           | 30                        |
| 1YQ3           | 62                          | 90                        |
| 1YR5           | 304                         | 319                       |
| 1YUC           | 341                         | 362                       |
| 1YUC           | 19                          | 27                        |
| 1YUC           | 371                         | 381                       |
| 1YUC           | 19                          | 27                        |
| 1Z00           | 260                         | 266                       |
| 1Z00           | 224                         | 240                       |
| 1Z0J           | 736                         | 756                       |
| 1Z0J           | 759                         | 780                       |
| 1Z0K           | 458                         | 476                       |
| 1Z0K           | 479                         | 501                       |
| 1Z2C           | 95                          | 107                       |
| 1Z2C           | 98                          | 106                       |
| 1Z2C           | 69                          | 75                        |
| 1Z5S           | 131                         | 140                       |
| 1Z5S           | 5                           | 19                        |
| 1Z5X           | 369                         | 400                       |
| 1Z5X           | 449                         | 455                       |
| 1Z7M           | 185                         | 190                       |
| 1Z8U           | 34                          | 52                        |
| 1Z8U           | 119                         | 130                       |
| 1Z92           | 63                          | 72                        |
| 1ZAV           | 137                         | 177                       |
| 1ZAV           | 15                          | 30                        |
| 1ZAV           | 137                         | 177                       |
| 1ZAV           | 15                          | 29                        |
| 1ZAV           | 137                         | 177                       |
| 1ZAV           | 15                          | 30                        |
| 1ZAV           | 137                         | 177                       |
| 1ZAV           | 15                          | 29                        |
| 1ZAV           | 137                         | 177                       |
| 1ZAV           | 137                         | 177                       |
| 1ZAV           | 15                          | 27                        |
| 1ZC4           | 258                         | 281                       |
| 1ZDT           | 291                         | 301                       |
| 1ZE3           | 95                          | 99                        |
| 1ZE3           | 20                          | 24                        |
| 1ZHI           | 116                         | 127                       |
| 1ZM2           | 702                         | 720                       |
| 1ZNV           | 51                          | 56                        |
| 1ZOQ           | 2094                        | 2105                      |
| 1ZOQ           | 322                         | 334                       |
| 1ZOQ           | 370                         | 382                       |
| 1ZOQ           | 2080                        | 2092                      |
| 1ZUZ           | 138                         | 147                       |
| 1ZVV           | 47                          | 54                        |
| 1ZW3           | 6                           | 27                        |
| 1ZY3           | 75                          | 88                        |

| A. PDB<br>CODE | L. HELIX SEQUENCE                         |
|----------------|-------------------------------------------|
| 1YOV           | LVLPG                                     |
| 1YOV           | SGKYIKLQNVYREKAKKDAAAVGNHVAKLLQS          |
| 1YOV           | ASTNAVIAAVCATEVFKIATS                     |
| 1YOV           | YRLTQGVVK                                 |
| 1YOV           | DRQLRLW                                   |
| 1YOV           | HTIAAFLGGAAAQEVIKIITK                     |
| 1YOV           | LVLPG                                     |
| 1YOV           | ASTNAVIAAVCATEVFKIATS                     |
| 1YOV           | KAEVAAEFLNDRV                             |
| 1YQ3           | TGHSLHTLYGRSLR                            |
| 1YQ3           | PGKAIAEIKKMMATY                           |
| 1YQ3           | LPMAMSITHRGTGVALSLGVSLFSLAALLL            |
| 1YQ3           | PALIYSAKFALVFPLSYHTWNGIRHLVWDM            |
| 1YQ3           | AASLHWTSERAVSALLLGLLPAAYLY                |
| 1YQ3           | DTPIKVANTGLYVLSAITFTGLCYFNYYD             |
| 1YR5           | KWKQSVRLISLCQRLS                          |
| 1YUC           | TFGLMCKMADQTLFSIVEWARS                    |
| 1YUC           | AILYALLSS                                 |
| 1YUC           | VDDQMKLLQNC                               |
| 1YUC           | AILYALLSS                                 |
| 1Z00           | LEQLIAA                                   |
| 1Z00           | MEKLEQDFVSRVTECLT                         |
| 1Z0J           | EELLQIDNIKAYIFDAKQC                       |
| 1Z0J           | LDEVEVLTENRELKHTLAKQK                     |
| 1Z0K           | PLLQIHNITSFIRQAKAA                        |
| 1Z0K           | MDEVRTLQENLRQLQDEYDQQQT                   |
| 1Z2C           | IPEKWTPEVKHFC                             |
| 1Z2C           | EEKQPLRE                                  |
| 1Z2C           | LRPLSYP                                   |
| 1Z5S           | AEAYTIYCQN                                |
| 1Z5S           | ALSRLAQRKAWRKD                            |
| 1Z5X           | ATTIFAKLLSVLTELRTLGNMNSSETCFSLKLLK        |
| 1Z5X           | RFKLLL                                    |
| 1Z7M           | KSSFKF                                    |
| 1Z8U           | EEDMVTVVEDWMNFYINYY                       |
| 1Z8U           | PAVHASLDKFLA                              |
| 1Z92           | LKPLEEVLNL                                |
| 1ZAV           | KEELYAMLVGRVKAPITGLVFALSGILRNLYVVLNAIKEKK |
| 1ZAV           | VSELAELVKKLEDKFG                          |
| 1ZAV           | KEELYAMLVGRVKAPITGLVFALSGILRNLYVVLNAIKEKK |
| 1ZAV           | VSELAELVKKLEDKF                           |
| 1ZAV           | KEELYAMLVGRVKAPITGLVFALSGILRNLYVVLNAIKEKK |
| 1ZAV           | VSELAELVKKLEDKFG                          |
| 1ZAV           | KEELYAMLVGRVKAPITGLVFALSGILRNLYVVLNAIKEKK |
| 1ZAV           | VSELAELVKKLEDKF                           |
| 1ZAV           | KEELYAMLVGRVKAPITGLVFALSGILRNLYVVLNAIKEKK |
| 1ZAV           | KEELYAMLVGRVKAPITGLVFALSGILRNLYVVLNAIKEKK |
| 1ZAV           | VSELAELVKKLED                             |
| 1ZC4           | AKIKREWLEEVLEETKRALSDKRRR                 |
| 1ZDT           | VADQMTLLQNC                               |
| 1ZE3           | KSKLT                                     |
| 1ZE3           | SRFEN                                     |
| 1ZHI           | LNYYNKLFSETA                              |
| 1ZM2           | GGQIPTMRRATYAGFLLA                        |
| 1ZNV           | TDLIYY                                    |
| 1ZOQ           | PQLMAAFIKQRT                              |
| 1ZOQ           | LGPFIVDLITFTE                             |
| 1ZOQ           | TCLRALVEMARVG                             |
| 1ZOQ           | PQQQQQVLNILKS                             |
| 1ZUZ           | YEFEVQMMTA                                |
| 1ZVV           | IMGLMSLA                                  |
| 1ZW3           | RTIESILEPVAQQISHLVIMHE                    |
| 1ZY3           | QQRFTQVSDELFGG                            |



| A. PDB CODE | B. INTERFACE CHAINS | C. CHAIN | D. TITLE                                                                                |
|-------------|---------------------|----------|-----------------------------------------------------------------------------------------|
| 1ZY3        | A B                 | B        | STRUCTURAL MODEL OF COMPLEX OF BCL-W PROTEIN WITH BID BH3- PEPTIDE                      |
| 2A1J        | A B                 | A        | CRYSTAL STRUCTURE OF THE COMPLEX BETWEEN THE C-TERMINAL DOMAINS OF HUMAN XPF AND EF     |
| 2A1J        | A B                 | A        | CRYSTAL STRUCTURE OF THE COMPLEX BETWEEN THE C-TERMINAL DOMAINS OF HUMAN XPF AND EF     |
| 2A1J        | A B                 | B        | CRYSTAL STRUCTURE OF THE COMPLEX BETWEEN THE C-TERMINAL DOMAINS OF HUMAN XPF AND EF     |
| 2A1J        | A B                 | B        | CRYSTAL STRUCTURE OF THE COMPLEX BETWEEN THE C-TERMINAL DOMAINS OF HUMAN XPF AND EF     |
| 2A1T        | D S                 | D        | STRUCTURE OF THE HUMAN MCAD:ETF E165BETAA COMPLEX                                       |
| 2A1T        | R S                 | S        | STRUCTURE OF THE HUMAN MCAD:ETF E165BETAA COMPLEX                                       |
| 2A1T        | R S                 | S        | STRUCTURE OF THE HUMAN MCAD:ETF E165BETAA COMPLEX                                       |
| 2A3I        | A B                 | A        | STRUCTURAL AND BIOCHEMICAL MECHANISMS FOR THE SPECIFICITY OF HORMONE BINDING AND CO.    |
| 2A3I        | A B                 | B        | STRUCTURAL AND BIOCHEMICAL MECHANISMS FOR THE SPECIFICITY OF HORMONE BINDING AND CO.    |
| 2A40        | A C                 | C        | TERNARY COMPLEX OF THE WH2 DOMAIN OF WAVE WITH ACTIN-DNASE I                            |
| 2A40        | D F                 | F        | TERNARY COMPLEX OF THE WH2 DOMAIN OF WAVE WITH ACTIN-DNASE I                            |
| 2A45        | G H                 | G        | CRYSTAL STRUCTURE OF THE COMPLEX BETWEEN THROMBIN AND THE CENTRAL "E" REGION OF FIBRI   |
| 2A45        | G I                 | G        | CRYSTAL STRUCTURE OF THE COMPLEX BETWEEN THROMBIN AND THE CENTRAL "E" REGION OF FIBRI   |
| 2A4J        | A B                 | A        | SOLUTION STRUCTURE OF THE C-TERMINAL DOMAIN (T94-Y172) OF THE HUMAN CENTRIN 2 IN COMPLI |
| 2A78        | A B                 | B        | CRYSTAL STRUCTURE OF THE C3BOT-RALA COMPLEX REVEALS A NOVEL TYPE OF ACTION OF A BACTE   |
| 2ACL        | A B                 | A        | LIVER X-RECEPTOR ALPHA LIGAND BINDING DOMAIN WITH SB313987                              |
| 2ACL        | A B                 | A        | LIVER X-RECEPTOR ALPHA LIGAND BINDING DOMAIN WITH SB313987                              |
| 2ACL        | A B                 | B        | LIVER X-RECEPTOR ALPHA LIGAND BINDING DOMAIN WITH SB313987                              |
| 2ACL        | A B                 | B        | LIVER X-RECEPTOR ALPHA LIGAND BINDING DOMAIN WITH SB313987                              |
| 2ACL        | C D                 | C        | LIVER X-RECEPTOR ALPHA LIGAND BINDING DOMAIN WITH SB313987                              |
| 2ACL        | C D                 | D        | LIVER X-RECEPTOR ALPHA LIGAND BINDING DOMAIN WITH SB313987                              |
| 2ACL        | C H                 | C        | LIVER X-RECEPTOR ALPHA LIGAND BINDING DOMAIN WITH SB313987                              |
| 2ACL        | E B                 | E        | LIVER X-RECEPTOR ALPHA LIGAND BINDING DOMAIN WITH SB313987                              |
| 2ACL        | E F                 | E        | LIVER X-RECEPTOR ALPHA LIGAND BINDING DOMAIN WITH SB313987                              |
| 2ACL        | G D                 | G        | LIVER X-RECEPTOR ALPHA LIGAND BINDING DOMAIN WITH SB313987                              |
| 2ACL        | G H                 | H        | LIVER X-RECEPTOR ALPHA LIGAND BINDING DOMAIN WITH SB313987                              |
| 2ACL        | G H                 | H        | LIVER X-RECEPTOR ALPHA LIGAND BINDING DOMAIN WITH SB313987                              |
| 2AGH        | A B                 | A        | STRUCTURAL BASIS FOR COOPERATIVE TRANSCRIPTION FACTOR BINDING TO THE CBP COACTIVATOR    |
| 2AGH        | A B                 | B        | STRUCTURAL BASIS FOR COOPERATIVE TRANSCRIPTION FACTOR BINDING TO THE CBP COACTIVATOR    |
| 2AGH        | A B                 | B        | STRUCTURAL BASIS FOR COOPERATIVE TRANSCRIPTION FACTOR BINDING TO THE CBP COACTIVATOR    |
| 2AQ1        | A B                 | B        | CRYSTAL STRUCTURE OF T-CELL RECEPTOR V BETA DOMAIN VARIANT COMPLEXED WITH SUPERANTIC    |
| 2AST        | A B                 | B        | CRYSTAL STRUCTURE OF SKP1-SKP2-CKS1 IN COMPLEX WITH A P27 PEPTIDE                       |
| 2AST        | A B                 | B        | CRYSTAL STRUCTURE OF SKP1-SKP2-CKS1 IN COMPLEX WITH A P27 PEPTIDE                       |
| 2AUH        | A B                 | A        | CRYSTAL STRUCTURE OF THE GRB14 BPS REGION IN COMPLEX WITH THE INSULIN RECEPTOR TYROSIN  |
| 2AUS        | A B                 | B        | CRYSTAL STRUCTURE OF THE ARCHAEAL BOX H/ACA SRNP NOP10-CBF5 COMPLEX                     |
| 2AUS        | C D                 | D        | CRYSTAL STRUCTURE OF THE ARCHAEAL BOX H/ACA SRNP NOP10-CBF5 COMPLEX                     |
| 2AVU        | B E                 | B        | STRUCTURE OF THE ESCHERICHIA COLI FLHDC COMPLEX, A PROKARYOTIC HETEROMERIC REGULATOI    |
| 2AVU        | B E                 | E        | STRUCTURE OF THE ESCHERICHIA COLI FLHDC COMPLEX, A PROKARYOTIC HETEROMERIC REGULATOI    |
| 2AVU        | D F                 | D        | STRUCTURE OF THE ESCHERICHIA COLI FLHDC COMPLEX, A PROKARYOTIC HETEROMERIC REGULATOI    |
| 2AYO        | A B                 | A        | STRUCTURE OF USP14 BOUND TO UBQUITIN ALDEHYDE                                           |
| 2AZE        | A B                 | A        | STRUCTURE OF THE RB C-TERMINAL DOMAIN BOUND TO AN E2F1-DP1 HETERODIMER                  |
| 2AZE        | A B                 | B        | STRUCTURE OF THE RB C-TERMINAL DOMAIN BOUND TO AN E2F1-DP1 HETERODIMER                  |
| 2B59        | A B                 | B        | THE TYPE II COHESIN DOCKERIN COMPLEX                                                    |
| 2B5I        | A B                 | A        | CYTOKINE RECEPTOR COMPLEX                                                               |
| 2B5I        | A B                 | A        | CYTOKINE RECEPTOR COMPLEX                                                               |
| 2B5L        | B D                 | D        | CRYSTAL STRUCTURE OF DDB1 IN COMPLEX WITH SIMIAN VIRUS 5 V PROTEIN                      |
| 2B5T        | A B                 | A        | 2.1 ANGSTROM STRUCTURE OF A NONPRODUCTIVE COMPLEX BETWEEN ANTITHROMBIN, SYNTHETIC I     |
| 2B5T        | C D                 | C        | 2.1 ANGSTROM STRUCTURE OF A NONPRODUCTIVE COMPLEX BETWEEN ANTITHROMBIN, SYNTHETIC I     |
| 2B87        | A B                 | A        | STRUCTURAL BASIS FOR MOLECULAR RECOGNITION IN AN AFFIBODY:AFFIBODY COMPLEX              |
| 2B87        | A B                 | B        | STRUCTURAL BASIS FOR MOLECULAR RECOGNITION IN AN AFFIBODY:AFFIBODY COMPLEX              |
| 2B9S        | A B                 | A        | CRYSTAL STRUCTURE OF HETERODIMERIC L. DONOVANI TOPOISOMERASE I-VANADATE-DNA COMPLEX     |
| 2B9S        | A B                 | A        | CRYSTAL STRUCTURE OF HETERODIMERIC L. DONOVANI TOPOISOMERASE I-VANADATE-DNA COMPLEX     |
| 2B9S        | A B                 | B        | CRYSTAL STRUCTURE OF HETERODIMERIC L. DONOVANI TOPOISOMERASE I-VANADATE-DNA COMPLEX     |
| 2BBM        | A B                 | A        | SOLUTION STRUCTURE OF A CALMODULIN-TARGET PEPTIDE COMPLEX BY MULTIDIMENSIONAL NMR       |
| 2BBM        | A B                 | A        | SOLUTION STRUCTURE OF A CALMODULIN-TARGET PEPTIDE COMPLEX BY MULTIDIMENSIONAL NMR       |
| 2BBM        | A B                 | B        | SOLUTION STRUCTURE OF A CALMODULIN-TARGET PEPTIDE COMPLEX BY MULTIDIMENSIONAL NMR       |
| 2BCJ        | A Q                 | A        | CRYSTAL STRUCTURE OF G PROTEIN-COUPLED RECEPTOR KINASE 2 IN COMPLEX WITH GALPHA-Q ANI   |
| 2BCJ        | A Q                 | Q        | CRYSTAL STRUCTURE OF G PROTEIN-COUPLED RECEPTOR KINASE 2 IN COMPLEX WITH GALPHA-Q ANI   |
| 2BCJ        | B G                 | B        | CRYSTAL STRUCTURE OF G PROTEIN-COUPLED RECEPTOR KINASE 2 IN COMPLEX WITH GALPHA-Q ANI   |
| 2BCJ        | B G                 | B        | CRYSTAL STRUCTURE OF G PROTEIN-COUPLED RECEPTOR KINASE 2 IN COMPLEX WITH GALPHA-Q ANI   |
| 2BCJ        | B G                 | G        | CRYSTAL STRUCTURE OF G PROTEIN-COUPLED RECEPTOR KINASE 2 IN COMPLEX WITH GALPHA-Q ANI   |
| 2BE6        | A D                 | A        | 2.0 A CRYSTAL STRUCTURE OF THE CAV1.2 IQ DOMAIN-CA/CAM COMPLEX                          |

TABLE S4

Jochim, et al

| A. PDB<br>CODE | E. FUNCTION                        | F. $\Delta\Delta G_{\text{AVG,HELIX}}$<br>(KCAL/MOL) | G. $\Delta\Delta G_{\text{SUM,HELIX}}$<br>(KCAL/MOL) | H. # HOTSPOT<br>RESIDUES | I. HELIX<br>LENGTH |
|----------------|------------------------------------|------------------------------------------------------|------------------------------------------------------|--------------------------|--------------------|
| 1ZY3           | APOPTOSIS                          | 1.5                                                  | 2.9                                                  | 2                        | 16                 |
| 2A1J           | DNA BINDING PROTEIN                | 1.9                                                  | 3.8                                                  | 2                        | 12                 |
| 2A1J           | DNA BINDING PROTEIN                | 1.7                                                  | 3.4                                                  | 2                        | 6                  |
| 2A1J           | DNA BINDING PROTEIN                | 1.4                                                  | 2.8                                                  | 2                        | 20                 |
| 2A1J           | DNA BINDING PROTEIN                | 1.1                                                  | 2.1                                                  | 2                        | 13                 |
| 2A1T           | OXIDOREDUCTASE/ELECTRON TRANSPORT  | 1.7                                                  | 6.6                                                  | 4                        | 21                 |
| 2A1T           | OXIDOREDUCTASE/ELECTRON TRANSPORT  | 1.4                                                  | 2.7                                                  | 2                        | 6                  |
| 2A1T           | OXIDOREDUCTASE/ELECTRON TRANSPORT  | 1.6                                                  | 4.8                                                  | 3                        | 10                 |
| 2A3I           | TRANSFERASE                        | 1.2                                                  | 2.4                                                  | 2                        | 11                 |
| 2A3I           | TRANSFERASE                        | 1.8                                                  | 5.3                                                  | 3                        | 7                  |
| 2A40           | STRUCTURAL PROTEIN                 | 1.6                                                  | 4.7                                                  | 3                        | 12                 |
| 2A40           | STRUCTURAL PROTEIN                 | 1.6                                                  | 3.1                                                  | 2                        | 12                 |
| 2A45           | BLOOD CLOTTING                     | 1.7                                                  | 3.3                                                  | 2                        | 25                 |
| 2A45           | BLOOD CLOTTING                     | 1.5                                                  | 3.0                                                  | 2                        | 25                 |
| 2A4J           | STRUCTURAL PROTEIN                 | 1.4                                                  | 2.8                                                  | 2                        | 10                 |
| 2A78           | PROTEIN BINDING/TRANSFERASE        | 1.6                                                  | 3.2                                                  | 2                        | 16                 |
| 2ACL           | TRANSCRIPTION                      | 1.6                                                  | 3.2                                                  | 2                        | 23                 |
| 2ACL           | TRANSCRIPTION                      | 1.5                                                  | 2.9                                                  | 2                        | 7                  |
| 2ACL           | TRANSCRIPTION                      | 1.6                                                  | 7.9                                                  | 5                        | 29                 |
| 2ACL           | TRANSCRIPTION                      | 1.7                                                  | 3.4                                                  | 2                        | 23                 |
| 2ACL           | TRANSCRIPTION                      | 1.5                                                  | 4.5                                                  | 3                        | 9                  |
| 2ACL           | TRANSCRIPTION                      | 1.4                                                  | 4.3                                                  | 3                        | 25                 |
| 2ACL           | TRANSCRIPTION                      | 1.3                                                  | 2.6                                                  | 2                        | 11                 |
| 2ACL           | TRANSCRIPTION                      | 1.1                                                  | 2.2                                                  | 2                        | 23                 |
| 2ACL           | TRANSCRIPTION                      | 1.1                                                  | 2.2                                                  | 2                        | 13                 |
| 2ACL           | TRANSCRIPTION                      | 1.3                                                  | 2.6                                                  | 2                        | 23                 |
| 2ACL           | TRANSCRIPTION                      | 1.8                                                  | 7.3                                                  | 4                        | 26                 |
| 2ACL           | TRANSCRIPTION                      | 1.6                                                  | 3.2                                                  | 2                        | 10                 |
| 2AGH           | TRANSCRIPTION                      | 1.7                                                  | 8.7                                                  | 5                        | 19                 |
| 2AGH           | TRANSCRIPTION                      | 1.3                                                  | 5.1                                                  | 4                        | 16                 |
| 2AGH           | TRANSCRIPTION                      | 1.5                                                  | 7.5                                                  | 5                        | 23                 |
| 2AQ1           | IMMUNE SYSTEM                      | 1.3                                                  | 2.5                                                  | 2                        | 9                  |
| 2AST           | CELL CYCLE/LIGASE/PROTEIN TURNOVER | 1.3                                                  | 2.5                                                  | 2                        | 8                  |
| 2AST           | CELL CYCLE/LIGASE/PROTEIN TURNOVER | 1.0                                                  | 2.0                                                  | 2                        | 10                 |
| 2AUH           | TRANSFERASE/SIGNALING PROTEIN      | 1.1                                                  | 2.1                                                  | 2                        | 16                 |
| 2AUS           | ISOMERASE/STRUCTURAL PROTEIN       | 1.7                                                  | 5.1                                                  | 3                        | 12                 |
| 2AUS           | ISOMERASE/STRUCTURAL PROTEIN       | 1.1                                                  | 2.2                                                  | 2                        | 13                 |
| 2AVU           | TRANSCRIPTION ACTIVATOR            | 1.9                                                  | 7.7                                                  | 4                        | 22                 |
| 2AVU           | TRANSCRIPTION ACTIVATOR            | 1.4                                                  | 2.7                                                  | 2                        | 16                 |
| 2AVU           | TRANSCRIPTION ACTIVATOR            | 1.5                                                  | 7.5                                                  | 5                        | 21                 |
| 2AYO           | HYDROLASE                          | 1.7                                                  | 3.4                                                  | 2                        | 16                 |
| 2AZE           | CELL CYCLE, TRANSCRIPTION          | 1.7                                                  | 8.6                                                  | 5                        | 48                 |
| 2AZE           | CELL CYCLE, TRANSCRIPTION          | 1.6                                                  | 11.3                                                 | 7                        | 35                 |
| 2B59           | HYDROLASE/STRUCTURAL PROTEIN       | 1.6                                                  | 6.2                                                  | 4                        | 10                 |
| 2B5I           | CYTOKINE/CYTOKINE RECEPTOR         | 1.5                                                  | 4.6                                                  | 3                        | 17                 |
| 2B5I           | CYTOKINE/CYTOKINE RECEPTOR         | 1.8                                                  | 10.8                                                 | 6                        | 23                 |
| 2B5L           | PROTEIN BINDING/VIRAL PROTEIN      | 1.6                                                  | 3.2                                                  | 2                        | 11                 |
| 2B5T           | BLOOD CLOTTING                     | 1.5                                                  | 4.6                                                  | 3                        | 8                  |
| 2B5T           | BLOOD CLOTTING                     | 1.2                                                  | 3.6                                                  | 3                        | 7                  |
| 2B87           | PROTEIN BINDING                    | 1.9                                                  | 3.8                                                  | 2                        | 14                 |
| 2B87           | PROTEIN BINDING                    | 1.4                                                  | 2.8                                                  | 2                        | 14                 |
| 2B9S           | ISOMERASE/DNA                      | 1.9                                                  | 5.6                                                  | 3                        | 19                 |
| 2B9S           | ISOMERASE/DNA                      | 1.5                                                  | 9.1                                                  | 6                        | 20                 |
| 2B9S           | ISOMERASE/DNA                      | 1.3                                                  | 5.2                                                  | 4                        | 9                  |
| 2BBM           | CALCIUM-BINDING PROTEIN            | 1.1                                                  | 2.2                                                  | 2                        | 12                 |
| 2BBM           | CALCIUM-BINDING PROTEIN            | 1.7                                                  | 3.3                                                  | 2                        | 9                  |
| 2BBM           | CALCIUM-BINDING PROTEIN            | 1.6                                                  | 9.6                                                  | 6                        | 17                 |
| 2BCJ           | TRANSFERASE/HYDROLASE              | 1.7                                                  | 8.7                                                  | 5                        | 22                 |
| 2BCJ           | TRANSFERASE/HYDROLASE              | 1.2                                                  | 3.7                                                  | 3                        | 9                  |
| 2BCJ           | TRANSFERASE/HYDROLASE              | 1.8                                                  | 5.4                                                  | 3                        | 10                 |
| 2BCJ           | TRANSFERASE/HYDROLASE              | 1.8                                                  | 3.5                                                  | 2                        | 14                 |
| 2BCJ           | TRANSFERASE/HYDROLASE              | 1.8                                                  | 7.3                                                  | 4                        | 20                 |
| 2BE6           | MEMBRANE PROTEIN                   | 1.3                                                  | 2.6                                                  | 2                        | 12                 |



TABLE S4

Jochim, et al

| A. PDB<br>CODE | J. HELIX START<br>RESIDUE # | K. HELIX END<br>RESIDUE # |
|----------------|-----------------------------|---------------------------|
| 1ZY3           | 203                         | 218                       |
| 2A1J           | 880                         | 891                       |
| 2A1J           | 838                         | 843                       |
| 2A1J           | 221                         | 240                       |
| 2A1J           | 279                         | 291                       |
| 2A1T           | 18                          | 38                        |
| 2A1T           | 243                         | 248                       |
| 2A1T           | 133                         | 142                       |
| 2A3I           | 795                         | 805                       |
| 2A3I           | 1434                        | 1440                      |
| 2A40           | 435                         | 446                       |
| 2A40           | 435                         | 446                       |
| 2A45           | 48                          | 72                        |
| 2A45           | 48                          | 72                        |
| 2A4J           | 159                         | 168                       |
| 2A78           | 102                         | 117                       |
| 2ACL           | 386                         | 408                       |
| 2ACL           | 414                         | 420                       |
| 2ACL           | 399                         | 427                       |
| 2ACL           | 373                         | 395                       |
| 2ACL           | 449                         | 457                       |
| 2ACL           | 401                         | 425                       |
| 2ACL           | 294                         | 304                       |
| 2ACL           | 294                         | 316                       |
| 2ACL           | 421                         | 433                       |
| 2ACL           | 264                         | 286                       |
| 2ACL           | 400                         | 425                       |
| 2ACL           | 281                         | 290                       |
| 2AGH           | 292                         | 310                       |
| 2AGH           | 597                         | 612                       |
| 2AGH           | 646                         | 668                       |
| 2AQ1           | 21                          | 29                        |
| 2AST           | 2125                        | 2132                      |
| 2AST           | 2149                        | 2158                      |
| 2AUH           | 1038                        | 1053                      |
| 2AUS           | 42                          | 53                        |
| 2AUS           | 42                          | 54                        |
| 2AVU           | 85                          | 106                       |
| 2AVU           | 91                          | 106                       |
| 2AVU           | 85                          | 105                       |
| 2AYO           | 199                         | 214                       |
| 2AZE           | 199                         | 246                       |
| 2AZE           | 202                         | 236                       |
| 2B59           | 144                         | 153                       |
| 2B5I           | 82                          | 98                        |
| 2B5I           | 7                           | 29                        |
| 2B5L           | 24                          | 34                        |
| 2B5T           | 14                          | 14                        |
| 2B5T           | 14                          | 14                        |
| 2B87           | 24                          | 37                        |
| 2B87           | 6                           | 19                        |
| 2B9S           | 406                         | 424                       |
| 2B9S           | 433                         | 452                       |
| 2B9S           | 215                         | 223                       |
| 2BBM           | 118                         | 129                       |
| 2BBM           | 138                         | 146                       |
| 2BBM           | 5                           | 21                        |
| 2BCJ           | 98                          | 119                       |
| 2BCJ           | 210                         | 218                       |
| 2BCJ           | 3                           | 12                        |
| 2BCJ           | 13                          | 26                        |
| 2BCJ           | 5                           | 24                        |
| 2BE6           | 118                         | 129                       |

| A. PDB<br>CODE | L. HELIX SEQUENCE                                |
|----------------|--------------------------------------------------|
| 1ZY3           | KNIARHLAQVGDSDMR                                 |
| 2A1J           | AANAKQLYDFIH                                     |
| 2A1J           | QDFLLK                                           |
| 2A1J           | DLLMEKLEQDFVSRVTECLT                             |
| 2A1J           | PQKARRLFDVLHE                                    |
| 2A1T           | EQQKEFQATARKFAREEIIPV                            |
| 2A1T           | EDLVAK                                           |
| 2A1T           | QTGQMTAGFL                                       |
| 2A3I           | LEDQITLIQYS                                      |
| 2A3I           | LLQQLLT                                          |
| 2A40           | ARSDLLSAIRQG                                     |
| 2A40           | ARSDLLSAIRQG                                     |
| 2A45           | GCRMKGLIDEVNDFTNRINKLKNS                         |
| 2A45           | GCRMKGLIDEVNDFTNRINKLKNS                         |
| 2A4J           | EQEFLRIMKK                                       |
| 2A78           | SNLIKQVELLDKSFNK                                 |
| 2ACL           | PAEVEALREKVYASLEAYCKHKY                          |
| 2ACL           | RFKLLL                                           |
| 2ACL           | PLMFPRMLMKLVSLRTLSSVHSEQVFALR                    |
| 2ACL           | QLQVERLQHTYVEALHAYVSINH                          |
| 2ACL           | TFLMEMLEA                                        |
| 2ACL           | MFPRMLMKLVSLRTLSSVHSEQVFA                        |
| 2ACL           | LDDQVILLRAG                                      |
| 2ACL           | LDDQVILLRAGWNELLIASFSHR                          |
| 2ACL           | RLPALRSIGLKCL                                    |
| 2ACL           | PVTNICQAADKQLFTLVEWAKRI                          |
| 2ACL           | LMFPRMLMKLVSLRTLSSVHSEQVFA                       |
| 2ACL           | REDQIALLKT                                       |
| 2AGH           | EKRIKELELLLMSTENELK                              |
| 2AGH           | QDLRSHLVHKLVAIF                                  |
| 2AGH           | RDEYYHLLAEKIYKIQKELEEKR                          |
| 2AQ1           | MGNMKYLYD                                        |
| 2AST           | KRWYRLAS                                         |
| 2AST           | PDVTGRLLSQ                                       |
| 2AUH           | LRERIEFLNEASVMKG                                 |
| 2AUS           | GEYRRRLKRELL                                     |
| 2AUS           | GEYRRRLKRELLG                                    |
| 2AVU           | DDLQIHTGIMLSTRLLNDVNQ                            |
| 2AVU           | GVDAAIKAYRLYLEQC                                 |
| 2AVU           | DDLQIHTGIMLSTRLLNDVN                             |
| 2AYO           | ANECWIQMMRVLQQKL                                 |
| 2AZE           | AQEQCNLEVERQRRLERIKQKQSQLQELILQQIAFKNLVQRNRHAEQQ |
| 2AZE           | RLEGLTQDLRQLQESEQLDHLMNICTTQIRLLSE               |
| 2B59           | MQDIMIVHKK                                       |
| 2B5I           | PRDLISNINVIVLELKG                                |
| 2B5I           | TKKTQLQLEHLLLDLQMILNGIN                          |
| 2B5L           | VEYFTSQVVTG                                      |
| 2B5T           | ERELLESY                                         |
| 2B5T           | ERELLES                                          |
| 2B87           | GVQVKAFIDSLRDD                                   |
| 2B87           | NKERVIAIGEIMRL                                   |
| 2B9S           | AKVFRTYNASITLDRWFKE                              |
| 2B9S           | TADKLAYFNKANTEVAILCN                             |
| 2B9S           | LGTSKINYI                                        |
| 2BBM           | DEEVDEMIREAD                                     |
| 2BBM           | YEEFVTMMT                                        |
| 2BBM           | KKNFIAVSAANRFKKIS                                |
| 2BCJ           | EEERLVCSEIFDFTYIMKELLA                           |
| 2BCJ           | RSERRKWIH                                        |
| 2BCJ           | ELDQLRQEAE                                       |
| 2BCJ           | QLKNQIRDARKACA                                   |
| 2BCJ           | NTASIAQARKLVEQLKMEAN                             |
| 2BE6           | DEEVDEMIREAD                                     |

| A. PDB<br>CODE | M. RESOLUTION |
|----------------|---------------|
| 1ZY3           | NOT APP       |
| 2A1J           | 2.7           |
| 2A1J           | 2.7           |
| 2A1J           | 2.7           |
| 2A1J           | 2.7           |
| 2A1T           | 2.8           |
| 2A1T           | 2.8           |
| 2A1T           | 2.8           |
| 2A3I           | 1.95          |
| 2A3I           | 1.95          |
| 2A40           | 1.8           |
| 2A40           | 1.8           |
| 2A45           | 3.65          |
| 2A45           | 3.65          |
| 2A4J           | NOT APP       |
| 2A78           | 1.81          |
| 2ACL           | 2.8           |
| 2ACL           | 2.8           |
| 2ACL           | 2.8           |
| 2ACL           | 2.8           |
| 2ACL           | 2.8           |
| 2ACL           | 2.8           |
| 2ACL           | 2.8           |
| 2ACL           | 2.8           |
| 2ACL           | 2.8           |
| 2ACL           | 2.8           |
| 2ACL           | 2.8           |
| 2ACL           | 2.8           |
| 2ACL           | 2.8           |
| 2AGH           | NOT APP       |
| 2AGH           | NOT APP       |
| 2AGH           | NOT APP       |
| 2AQ1           | 2.1           |
| 2AST           | 2.3           |
| 2AST           | 2.3           |
| 2AUH           | 3.2           |
| 2AUS           | 2.1           |
| 2AUS           | 2.1           |
| 2AVU           | 3             |
| 2AVU           | 3             |
| 2AVU           | 3             |
| 2AYO           | 3.5           |
| 2AZE           | 2.55          |
| 2AZE           | 2.55          |
| 2B59           | 2.11          |
| 2B5I           | 2.3           |
| 2B5I           | 2.3           |
| 2B5L           | 2.85          |
| 2B5T           | 2.1           |
| 2B5T           | 2.1           |
| 2B87           | NOT APP       |
| 2B87           | NOT APP       |
| 2B9S           | 2.27          |
| 2B9S           | 2.27          |
| 2B9S           | 2.27          |
| 2BBM           | NOT APP       |
| 2BBM           | NOT APP       |
| 2BBM           | NOT APP       |
| 2BCJ           | 3.06          |
| 2BCJ           | 3.06          |
| 2BCJ           | 3.06          |
| 2BCJ           | 3.06          |
| 2BCJ           | 3.06          |
| 2BE6           | 2             |

| A. PDB CODE | B. INTERFACE CHAINS | C. CHAIN | D. TITLE                                                                                            |
|-------------|---------------------|----------|-----------------------------------------------------------------------------------------------------|
| 2BE6        | A D                 | A        | 2.0 Å CRYSTAL STRUCTURE OF THE CAV1.2 IQ DOMAIN-CA/CAM COMPLEX                                      |
| 2BE6        | B E                 | B        | 2.0 Å CRYSTAL STRUCTURE OF THE CAV1.2 IQ DOMAIN-CA/CAM COMPLEX                                      |
| 2BE6        | C F                 | C        | 2.0 Å CRYSTAL STRUCTURE OF THE CAV1.2 IQ DOMAIN-CA/CAM COMPLEX                                      |
| 2BE6        | C F                 | C        | 2.0 Å CRYSTAL STRUCTURE OF THE CAV1.2 IQ DOMAIN-CA/CAM COMPLEX                                      |
| 2BEC        | A B                 | B        | CRYSTAL STRUCTURE OF CHP2 IN COMPLEX WITH ITS BINDING REGION IN NHE1 AND INSIGHTS INTO THE          |
| 2BEX        | B D                 | D        | CRYSTAL STRUCTURE OF PLACENTAL RIBONUCLEASE INHIBITOR IN COMPLEX WITH HUMAN EOSINOPHIL              |
| 2BEZ        | C F                 | C        | STRUCTURE OF A PROTEOLITICALLY RESISTANT CORE FROM THE SEVERE ACUTE RESPIRATORY SYNDROME            |
| 2BEZ        | C F                 | F        | STRUCTURE OF A PROTEOLITICALLY RESISTANT CORE FROM THE SEVERE ACUTE RESPIRATORY SYNDROME            |
| 2BGN        | C G                 | G        | HIV-1 TAT PROTEIN DERIVED N-TERMINAL NONAPEPTIDE TRP2-TAT (1-9) BOUND TO THE ACTIVE SITE OF         |
| 2BKR        | A B                 | A        | NEDD8 NEDP1 COMPLEX                                                                                 |
| 2BOV        | A B                 | A        | MOLECULAR RECOGNITION OF AN ADP-RIBOSYLATING CLOSTRIDIUM BOTULINUM C3 EXOENZYME BY                  |
| 2BYK        | B C                 | B        | HISTONE FOLD HETERODIMER OF THE CHROMATIN ACCESSIBILITY COMPLEX                                     |
| 2BZW        | A B                 | A        | THE CRYSTAL STRUCTURE OF BCL-XL IN COMPLEX WITH FULL-LENGTH BAD                                     |
| 2C0L        | A B                 | A        | TPR DOMAIN OF HUMAN PEX5P IN COMPLEX WITH HUMAN MSCP2                                               |
| 2COL        | A B                 | B        | TPR DOMAIN OF HUMAN PEX5P IN COMPLEX WITH HUMAN MSCP2                                               |
| 2C4F        | T U                 | U        | CRYSTAL STRUCTURE OF FACTOR VII <sub>STF</sub> COMPLEXED WITH PD0297121                             |
| 2C52        | A B                 | A        | STRUCTURAL DIVERSITY IN CBP P160 COMPLEXES                                                          |
| 2C5I        | T P                 | T        | N-TERMINAL DOMAIN OF TLG1 COMPLEXED WITH N-TERMINUS OF VPS51 IN DISTORTED CONFORMATION              |
| 2C9W        | A C                 | A        | CRYSTAL STRUCTURE OF SOCS-2 IN COMPLEX WITH ELONGIN-B AND ELONGIN-C AT 1.9 Å RESOLUTION             |
| 2CCI        | A B                 | A        | CRYSTAL STRUCTURE OF PHOSPHO-CDK2 CYCLIN A IN COMPLEX WITH A PEPTIDE CONTAINING BOTH T              |
| 2CCI        | A B                 | B        | CRYSTAL STRUCTURE OF PHOSPHO-CDK2 CYCLIN A IN COMPLEX WITH A PEPTIDE CONTAINING BOTH T              |
| 2CCI        | B F                 | B        | CRYSTAL STRUCTURE OF PHOSPHO-CDK2 CYCLIN A IN COMPLEX WITH A PEPTIDE CONTAINING BOTH T              |
| 2CG9        | B Y                 | B        | CRYSTAL STRUCTURE OF AN HSP90-SBA1 CLOSED CHAPERONE COMPLEX                                         |
| 2CLY        | A B                 | A        | SUBCOMPLEX OF THE STATOR OF BOVINE MITOCHONDRIAL ATP SYNTHASE                                       |
| 2CLY        | A B                 | B        | SUBCOMPLEX OF THE STATOR OF BOVINE MITOCHONDRIAL ATP SYNTHASE                                       |
| 2CLY        | A B                 | B        | SUBCOMPLEX OF THE STATOR OF BOVINE MITOCHONDRIAL ATP SYNTHASE                                       |
| 2CLY        | A C                 | A        | SUBCOMPLEX OF THE STATOR OF BOVINE MITOCHONDRIAL ATP SYNTHASE                                       |
| 2CLY        | D E                 | D        | SUBCOMPLEX OF THE STATOR OF BOVINE MITOCHONDRIAL ATP SYNTHASE                                       |
| 2CLY        | D F                 | D        | SUBCOMPLEX OF THE STATOR OF BOVINE MITOCHONDRIAL ATP SYNTHASE                                       |
| 2CNW        | B D                 | B        | GDPALF4 COMPLEX OF THE SRP GTPASES FFH AND FTSY                                                     |
| 2CNW        | C F                 | F        | GDPALF4 COMPLEX OF THE SRP GTPASES FFH AND FTSY                                                     |
| 2D1P        | A B                 | A        | CRYSTAL STRUCTURE OF HETEROHEXAMERIC TUSBCD PROTEINS, WHICH ARE CRUCIAL FOR THE TRNA <sup>VAL</sup> |
| 2D1P        | A C                 | C        | CRYSTAL STRUCTURE OF HETEROHEXAMERIC TUSBCD PROTEINS, WHICH ARE CRUCIAL FOR THE TRNA <sup>VAL</sup> |
| 2D1P        | A H                 | H        | CRYSTAL STRUCTURE OF HETEROHEXAMERIC TUSBCD PROTEINS, WHICH ARE CRUCIAL FOR THE TRNA <sup>VAL</sup> |
| 2D1P        | H I                 | H        | CRYSTAL STRUCTURE OF HETEROHEXAMERIC TUSBCD PROTEINS, WHICH ARE CRUCIAL FOR THE TRNA <sup>VAL</sup> |
| 2D26        | A B                 | A        | ACTIVE SITE DISTORTION IS SUFFICIENT FOR PROTEINASE INHIBIT SECOND CRYSTAL STRUCTURE OF C           |
| 2D3G        | A P                 | P        | DOUBLE SIDED UBIQUITIN BINDING OF HRS-UIM                                                           |
| 2D7D        | A B                 | B        | STRUCTURAL INSIGHTS INTO THE CRYPTIC DNA DEPENDENT ATP-ASE ACTIVITY OF UVRB                         |
| 2DF4        | A B                 | A        | STRUCTURE OF TRNA-DEPENDENT AMIDOTRANSFERASE GATCAB COMPLEXED WITH MN2+                             |
| 2DF4        | A C                 | A        | STRUCTURE OF TRNA-DEPENDENT AMIDOTRANSFERASE GATCAB COMPLEXED WITH MN2+                             |
| 2DF4        | A C                 | A        | STRUCTURE OF TRNA-DEPENDENT AMIDOTRANSFERASE GATCAB COMPLEXED WITH MN2+                             |
| 2DF4        | A C                 | A        | STRUCTURE OF TRNA-DEPENDENT AMIDOTRANSFERASE GATCAB COMPLEXED WITH MN2+                             |
| 2DF4        | A C                 | C        | STRUCTURE OF TRNA-DEPENDENT AMIDOTRANSFERASE GATCAB COMPLEXED WITH MN2+                             |
| 2DFK        | C D                 | C        | CRYSTAL STRUCTURE OF THE CDC42-COLLYBISTIN II COMPLEX                                               |
| 2DFK        | C D                 | D        | CRYSTAL STRUCTURE OF THE CDC42-COLLYBISTIN II COMPLEX                                               |
| 2DSQ        | C H                 | C        | STRUCTURAL BASIS FOR THE INHIBITION OF INSULIN-LIKE GROWTH FACTORS BY IGF BINDING PROTEIN           |
| 2DSQ        | I G                 | I        | STRUCTURAL BASIS FOR THE INHIBITION OF INSULIN-LIKE GROWTH FACTORS BY IGF BINDING PROTEIN           |
| 2DSR        | B I                 | B        | STRUCTURAL BASIS FOR THE INHIBITION OF INSULIN-LIKE GROWTH FACTORS BY IGF BINDING PROTEIN           |
| 2DSR        | G I                 | G        | STRUCTURAL BASIS FOR THE INHIBITION OF INSULIN-LIKE GROWTH FACTORS BY IGF BINDING PROTEIN           |
| 2DSR        | G I                 | I        | STRUCTURAL BASIS FOR THE INHIBITION OF INSULIN-LIKE GROWTH FACTORS BY IGF BINDING PROTEIN           |
| 2DT7        | A B                 | A        | SOLUTION STRUCTURE OF THE SECOND SURP DOMAIN OF HUMAN SPLICING FACTOR SF3A120 IN COMPLEX            |
| 2DWZ        | C D                 | D        | STRUCTURE OF THE ONCOPROTEIN GANKYRIN IN COMPLEX WITH S6 ATPASE OF THE 26S PROTEASOME               |
| 2DYM        | A B                 | A        | THE CRYSTAL STRUCTURE OF SACCHAROMYCES CEREVISIAE ATG5- ATG16(1-46) COMPLEX                         |
| 2DYM        | A B                 | B        | THE CRYSTAL STRUCTURE OF SACCHAROMYCES CEREVISIAE ATG5- ATG16(1-46) COMPLEX                         |
| 2DYM        | C D                 | C        | THE CRYSTAL STRUCTURE OF SACCHAROMYCES CEREVISIAE ATG5- ATG16(1-46) COMPLEX                         |
| 2DYM        | E F                 | E        | THE CRYSTAL STRUCTURE OF SACCHAROMYCES CEREVISIAE ATG5- ATG16(1-46) COMPLEX                         |
| 2DZN        | C D                 | C        | CRYSTAL STRUCTURE ANALYSIS OF YEAST NAS6P COMPLEXED WITH THE PROTEASOME SUBUNIT, RPT19              |
| 2E2D        | A C                 | A        | FLEXIBILITY AND VARIABILITY OF TIMP BINDING: X-RAY STRUCTURE OF THE COMPLEX BETWEEN COI             |
| 2E32        | C D                 | C        | STRUCTURAL BASIS FOR SELECTION OF GLYCOSYLATED SUBSTRATE BY SCFFBS1 UBIQUITIN LIGASE                |
| 2E9X        | A C                 | A        | THE CRYSTAL STRUCTURE OF HUMAN GINS CORE COMPLEX                                                    |
| 2E9X        | A D                 | A        | THE CRYSTAL STRUCTURE OF HUMAN GINS CORE COMPLEX                                                    |
| 2E9X        | A D                 | A        | THE CRYSTAL STRUCTURE OF HUMAN GINS CORE COMPLEX                                                    |
| 2E9X        | A F                 | A        | THE CRYSTAL STRUCTURE OF HUMAN GINS CORE COMPLEX                                                    |

TABLE S4

Jochim, et al

| A. PDB<br>CODE | E. FUNCTION                             | F. $\Delta\Delta G_{\text{AVG,HELIX}}$<br>(KCAL/MOL) | G. $\Delta\Delta G_{\text{SUM,HELIX}}$<br>(KCAL/MOL) | H. # HOTSPOT<br>RESIDUES | I. HELIX<br>LENGTH |
|----------------|-----------------------------------------|------------------------------------------------------|------------------------------------------------------|--------------------------|--------------------|
| 2BE6           | MEMBRANE PROTEIN                        | 1.6                                                  | 4.9                                                  | 3                        | 15                 |
| 2BE6           | MEMBRANE PROTEIN                        | 1.2                                                  | 4.8                                                  | 4                        | 14                 |
| 2BE6           | MEMBRANE PROTEIN                        | 1.8                                                  | 5.4                                                  | 3                        | 12                 |
| 2BE6           | MEMBRANE PROTEIN                        | 1.4                                                  | 5.7                                                  | 4                        | 12                 |
| 2BEC           | METAL BINDING PROTEIN/TRANSPORT PROTEIN | 1.5                                                  | 4.6                                                  | 3                        | 22                 |
| 2BEX           | HYDROLASE/INHIBITOR                     | 1.4                                                  | 4.3                                                  | 3                        | 9                  |
| 2BEZ           | VIRAL PROTEIN                           | 1.4                                                  | 7.0                                                  | 5                        | 74                 |
| 2BEZ           | VIRAL PROTEIN                           | 1.8                                                  | 3.5                                                  | 2                        | 14                 |
| 2BGN           | HYDROLASE                               | 1.7                                                  | 3.3                                                  | 2                        | 19                 |
| 2BKR           | PROTEIN-BINDING/HYDROLASE               | 1.4                                                  | 2.8                                                  | 2                        | 9                  |
| 2BOV           | TRANSFERASE                             | 1.4                                                  | 2.8                                                  | 2                        | 11                 |
| 2BYK           | DNA-BINDING PROTEIN                     | 1.3                                                  | 2.5                                                  | 2                        | 29                 |
| 2BZW           | TRANSCRIPTION                           | 1.4                                                  | 4.1                                                  | 3                        | 13                 |
| 2C0L           | TRANSPORT PROTEIN/RECEPTOR              | 1.8                                                  | 3.6                                                  | 2                        | 14                 |
| 2C0L           | TRANSPORT PROTEIN/RECEPTOR              | 1.8                                                  | 3.6                                                  | 2                        | 12                 |
| 2C4F           | HYDROLASE                               | 1.7                                                  | 3.3                                                  | 2                        | 5                  |
| 2C52           | TRANSFERASE                             | 1.1                                                  | 3.3                                                  | 3                        | 13                 |
| 2C5I           | PROTEIN TRANSPORT                       | 1.8                                                  | 7.3                                                  | 4                        | 23                 |
| 2C9W           | TRANSCRIPTION REGULATION                | 1.9                                                  | 7.5                                                  | 4                        | 13                 |
| 2CCI           | CELL CYCLE                              | 1.2                                                  | 2.3                                                  | 2                        | 13                 |
| 2CCI           | CELL CYCLE                              | 1.4                                                  | 4.1                                                  | 3                        | 17                 |
| 2CCI           | CELL CYCLE                              | 1.9                                                  | 5.7                                                  | 3                        | 8                  |
| 2CG9           | CHAPERONE                               | 1.1                                                  | 3.2                                                  | 3                        | 23                 |
| 2CLY           | HYDROLASE                               | 1.9                                                  | 25.9                                                 | 14                       | 62                 |
| 2CLY           | HYDROLASE                               | 1.1                                                  | 2.2                                                  | 2                        | 23                 |
| 2CLY           | HYDROLASE                               | 1.2                                                  | 2.3                                                  | 2                        | 10                 |
| 2CLY           | HYDROLASE                               | 1.6                                                  | 7.9                                                  | 5                        | 62                 |
| 2CLY           | HYDROLASE                               | 1.9                                                  | 25.2                                                 | 13                       | 64                 |
| 2CLY           | HYDROLASE                               | 1.5                                                  | 5.9                                                  | 4                        | 64                 |
| 2CNW           | SIGNAL RECOGNITION                      | 1.1                                                  | 3.4                                                  | 3                        | 17                 |
| 2CNW           | SIGNAL RECOGNITION                      | 1.7                                                  | 5.1                                                  | 3                        | 12                 |
| 2D1P           | TRANSLATION                             | 1.6                                                  | 3.2                                                  | 2                        | 11                 |
| 2D1P           | TRANSLATION                             | 1.9                                                  | 9.4                                                  | 5                        | 11                 |
| 2D1P           | TRANSLATION                             | 1.2                                                  | 2.4                                                  | 2                        | 11                 |
| 2D1P           | TRANSLATION                             | 1.1                                                  | 2.1                                                  | 2                        | 11                 |
| 2D26           | HYDROLASE/HYDROLASE INHIBITOR           | 1.2                                                  | 2.4                                                  | 2                        | 5                  |
| 2D3G           | PROTEIN TRANSPORT                       | 1.1                                                  | 2.2                                                  | 2                        | 17                 |
| 2D7D           | HYDROLASE/DNA                           | 1.3                                                  | 4.0                                                  | 3                        | 19                 |
| 2DF4           | LIGASE                                  | 1.3                                                  | 2.5                                                  | 2                        | 6                  |
| 2DF4           | LIGASE                                  | 1.4                                                  | 2.7                                                  | 2                        | 14                 |
| 2DF4           | LIGASE                                  | 1.7                                                  | 12.0                                                 | 7                        | 26                 |
| 2DF4           | LIGASE                                  | 1.5                                                  | 4.4                                                  | 3                        | 21                 |
| 2DF4           | LIGASE                                  | 1.9                                                  | 3.8                                                  | 2                        | 11                 |
| 2DFK           | CELL CYCLE                              | 1.2                                                  | 2.4                                                  | 2                        | 29                 |
| 2DFK           | CELL CYCLE                              | 1.5                                                  | 4.6                                                  | 3                        | 5                  |
| 2DSQ           | PROTEIN BINDING/HORMONE/GROWTH FACTOR   | 1.8                                                  | 3.5                                                  | 2                        | 12                 |
| 2DSQ           | PROTEIN BINDING/HORMONE/GROWTH FACTOR   | 1.6                                                  | 3.1                                                  | 2                        | 9                  |
| 2DSR           | PROTEIN BINDING/HORMONE/GROWTH FACTOR   | 1.8                                                  | 5.5                                                  | 3                        | 7                  |
| 2DSR           | PROTEIN BINDING/HORMONE/GROWTH FACTOR   | 1.4                                                  | 2.7                                                  | 2                        | 16                 |
| 2DSR           | PROTEIN BINDING/HORMONE/GROWTH FACTOR   | 1.3                                                  | 2.6                                                  | 2                        | 7                  |
| 2DT7           | RNA BINDING PROTEIN                     | 1.9                                                  | 7.5                                                  | 4                        | 18                 |
| 2DWZ           | ONCOPROTEIN                             | 1.5                                                  | 2.9                                                  | 2                        | 6                  |
| 2DYM           | PROTEIN TURNOVER/PROTEIN TURNOVER       | 1.3                                                  | 2.6                                                  | 2                        | 12                 |
| 2DYM           | PROTEIN TURNOVER/PROTEIN TURNOVER       | 1.8                                                  | 12.8                                                 | 7                        | 18                 |
| 2DYM           | PROTEIN TURNOVER/PROTEIN TURNOVER       | 1.4                                                  | 2.8                                                  | 2                        | 11                 |
| 2DYM           | PROTEIN TURNOVER/PROTEIN TURNOVER       | 1.6                                                  | 3.1                                                  | 2                        | 11                 |
| 2DZN           | PROTEIN BINDING                         | 1.5                                                  | 3.0                                                  | 2                        | 8                  |
| 2E2D           | HYDROLASE/HYDROLASE INHIBITOR           | 1.8                                                  | 3.6                                                  | 2                        | 13                 |
| 2E32           | LIGASE                                  | 1.6                                                  | 4.7                                                  | 3                        | 11                 |
| 2E9X           | REPLICATION                             | 1.9                                                  | 3.8                                                  | 2                        | 13                 |
| 2E9X           | REPLICATION                             | 1.7                                                  | 5.0                                                  | 3                        | 25                 |
| 2E9X           | REPLICATION                             | 1.2                                                  | 6.2                                                  | 5                        | 37                 |
| 2E9X           | REPLICATION                             | 1.6                                                  | 3.2                                                  | 2                        | 6                  |

TABLE S4

Jochim, et al

| A. PDB<br>CODE | J. HELIX START<br>RESIDUE # | K. HELIX END<br>RESIDUE # |
|----------------|-----------------------------|---------------------------|
| 2BE6           | 6                           | 20                        |
| 2BE6           | 65                          | 78                        |
| 2BE6           | 118                         | 129                       |
| 2BE6           | 82                          | 93                        |
| 2BEC           | 518                         | 539                       |
| 2BEX           | 7                           | 15                        |
| 2BEZ           | 899                         | 972                       |
| 2BEZ           | 1162                        | 1175                      |
| 2BGN           | 126                         | 144                       |
| 2BKR           | 56                          | 64                        |
| 2BOV           | 139                         | 149                       |
| 2BYK           | 31                          | 59                        |
| 2BZW           | 119                         | 131                       |
| 2C0L           | 556                         | 569                       |
| 2C0L           | 28                          | 39                        |
| 2C4F           | 102                         | 106                       |
| 2C52           | 38                          | 50                        |
| 2C5I           | 7                           | 29                        |
| 2C9W           | 163                         | 175                       |
| 2CCI           | 46                          | 58                        |
| 2CCI           | 253                         | 269                       |
| 2CCI           | 275                         | 282                       |
| 2CG9           | 387                         | 409                       |
| 2CLY           | 121                         | 182                       |
| 2CLY           | 101                         | 123                       |
| 2CLY           | 65                          | 74                        |
| 2CLY           | 121                         | 182                       |
| 2CLY           | 119                         | 182                       |
| 2CLY           | 119                         | 182                       |
| 2CNW           | 70                          | 86                        |
| 2CNW           | 145                         | 156                       |
| 2D1P           | 112                         | 122                       |
| 2D1P           | 79                          | 89                        |
| 2D1P           | 103                         | 113                       |
| 2D1P           | 103                         | 113                       |
| 2D26           | 54                          | 58                        |
| 2D3G           | 258                         | 274                       |
| 2D7D           | 623                         | 641                       |
| 2DF4           | 319                         | 324                       |
| 2DF4           | 305                         | 318                       |
| 2DF4           | 370                         | 395                       |
| 2DF4           | 24                          | 44                        |
| 2DF4           | 6                           | 16                        |
| 2DFK           | 212                         | 240                       |
| 2DFK           | 65                          | 69                        |
| 2DSQ           | 8                           | 19                        |
| 2DSQ           | 43                          | 51                        |
| 2DSR           | 68                          | 74                        |
| 2DSR           | 152                         | 167                       |
| 2DSR           | 43                          | 49                        |
| 2DT7           | 80                          | 97                        |
| 2DWZ           | 360                         | 365                       |
| 2DYM           | 0                           | 11                        |
| 2DYM           | 24                          | 41                        |
| 2DYM           | 0                           | 10                        |
| 2DYM           | 0                           | 10                        |
| 2DZN           | 39                          | 46                        |
| 2E2D           | 216                         | 228                       |
| 2E32           | 56                          | 66                        |
| 2E9X           | 4                           | 16                        |
| 2E9X           | 26                          | 50                        |
| 2E9X           | 58                          | 94                        |
| 2E9X           | 100                         | 105                       |

| A. PDB<br>CODE | L. HELIX SEQUENCE                                                         |
|----------------|---------------------------------------------------------------------------|
| 2BE6           | EEQIAEFKEAFSLFD                                                           |
| 2BE6           | FPEFLTMMARKMKD                                                            |
| 2BE6           | DEEVDEMIREAD                                                              |
| 2BE6           | EEEIREAFRVFD                                                              |
| 2BEC           | INEEIHTQFLDHLTGIEDICG                                                     |
| 2BEX           | WAQWFETQH                                                                 |
| 2BEZ           | YENQKQIANQFNKAISQIQESLTTTSTALGKLQDVVNQNAQALNTLVKQLSSNFGAISSVLNDILSRDKVEAE |
| 2BEZ           | QKEIDRLNEVAKNL                                                            |
| 2BGN           | PDEVVSLVNQGLQEGERDF                                                       |
| 2BKR           | PEVTQFIKC                                                                 |
| 2BOV           | VEEAKNRAEQW                                                               |
| 2BYK           | KEARAAIARAASVFAIFVTSSSTALAHKQ                                             |
| 2BZW           | AYQSFEQVVNELF                                                             |
| 2C0L           | IRSRYNLGISCINL                                                            |
| 2C0L           | KANLVFKEIEKK                                                              |
| 2C4F           | PYLET                                                                     |
| 2C52           | PQLMAAFIKQRTA                                                             |
| 2C5I           | PFQQVVKDTKEQLNRINNYITRH                                                   |
| 2C9W           | LQHLCRTINKCT                                                              |
| 2CCI           | STAIRESLLKEL                                                              |
| 2CCI           | LQLVGTAAAMLLASKFEE                                                        |
| 2CCI           | VAEFVYIT                                                                  |
| 2CG9           | KIMKVIRKNIVKLLIEAFNEIAE                                                   |
| 2CLY           | RHYLFDVQRNNIAMALEVTYRERLHRVYREVKNRLDYHISVQNMQRKEQEHMINWVEKRVV             |
| 2CLY           | AEFLTQSKTRIQEYEKELEKMRN                                                   |
| 2CLY           | LVDDFEKKFN                                                                |
| 2CLY           | RHYLFDVQRNNIAMALEVTYRERLHRVYREVKNRLDYHISVQNMQRKEQEHMINWVEKRVV             |
| 2CLY           | QKRHYLFDVQRNNIAMALEVTYRERLHRVYREVKNRLDYHISVQNMQRKEQEHMINWVEKRVV           |
| 2CLY           | QKRHYLFDVQRNNIAMALEVTYRERLHRVYREVKNRLDYHISVQNMQRKEQEHMINWVEKRVV           |
| 2CNW           | PAEVILATVYEALKEAL                                                         |
| 2CNW           | GGTQLSEWGKRL                                                              |
| 2D1P           | LGALAEASLTC                                                               |
| 2D1P           | YDFVRLTVKH                                                                |
| 2D1P           | ADALRRELANY                                                               |
| 2D1P           | ADALRRELANY                                                               |
| 2D26           | PVSIA                                                                     |
| 2D3G           | QEEEEELQLALALSQSEA                                                        |
| 2D7D           | ERQKVVEQMEHEMKEAAKA                                                       |
| 2DF4           | SNLSRF                                                                    |
| 2DF4           | GIPSYVVIASSEAS                                                            |
| 2DF4           | YYDAYYKKSQKVRTLKNDKDFKVFEN                                                |
| 2DF4           | ETEEMANTLESILDFAKQNDS                                                     |
| 2DF4           | REEVEHIANLA                                                               |
| 2DFK           | SDYRYVAAALAVMRNVTQQINERKRRLEN                                             |
| 2DFK           | DRLRP                                                                     |
| 2DSQ           | AELVDALQFVCG                                                              |
| 2DSQ           | IVDECCFRS                                                                 |
| 2DSR           | PLHTLMH                                                                   |
| 2DSR           | SCQSELHRALERLAAS                                                          |
| 2DSR           | IVDECCF                                                                   |
| 2DT7           | EFAEFYNRLKQIKEFHRK                                                        |
| 2DWZ           | LEDYVA                                                                    |
| 2DYM           | HMNDIKQLLWNG                                                              |
| 2DYM           | MDDLIRRLTDRNDKEAH                                                         |
| 2DYM           | HMNDIKQLLWN                                                               |
| 2DYM           | HMNDIKQLLWN                                                               |
| 2DZN           | PLHWSVSF                                                                  |
| 2E2D           | LFLVAAHEFGHSL                                                             |
| 2E32           | EPLLRVLAEL                                                                |
| 2E9X           | EKAMELIRELHRA                                                             |
| 2E9X           | EDGLRQVLEEMKALYEQNQSDVNEA                                                 |
| 2E9X           | LIPTIKFRHCSSLRNRRCTVAYLYDRLLRIRALRWEY                                     |
| 2E9X           | NALRFH                                                                    |

| A. PDB<br>CODE | M. RESOLUTION |
|----------------|---------------|
| 2BE6           | 2             |
| 2BE6           | 2             |
| 2BE6           | 2             |
| 2BE6           | 2             |
| 2BEC           | 2.7           |
| 2BEX           | 1.99          |
| 2BEZ           | 1.6           |
| 2BEZ           | 1.6           |
| 2BGN           | 3.15          |
| 2BKR           | 1.9           |
| 2BOV           | 2.66          |
| 2BYK           | 2.4           |
| 2BZW           | 2.3           |
| 2C0L           | 2.3           |
| 2C0L           | 2.3           |
| 2C4F           | 1.72          |
| 2C52           | NOT APP       |
| 2C5I           | 2.3           |
| 2C9W           | 1.9           |
| 2CCI           | 2.7           |
| 2CCI           | 2.7           |
| 2CCI           | 2.7           |
| 2CG9           | 3.1           |
| 2CLY           | 2.8           |
| 2CLY           | 2.8           |
| 2CLY           | 2.8           |
| 2CLY           | 2.8           |
| 2CLY           | 2.8           |
| 2CLY           | 2.8           |
| 2CNW           | 2.39          |
| 2CNW           | 2.39          |
| 2D1P           | 2.15          |
| 2D1P           | 2.15          |
| 2D1P           | 2.15          |
| 2D1P           | 2.15          |
| 2D26           | 3.3           |
| 2D3G           | 1.7           |
| 2D7D           | 2.1           |
| 2DF4           | 3.2           |
| 2DF4           | 3.2           |
| 2DF4           | 3.2           |
| 2DF4           | 3.2           |
| 2DF4           | 3.2           |
| 2DFK           | 2.15          |
| 2DFK           | 2.15          |
| 2DSQ           | 2.8           |
| 2DSQ           | 2.8           |
| 2DSR           | 2.1           |
| 2DSR           | 2.1           |
| 2DSR           | 2.1           |
| 2DT7           | NOT APP       |
| 2DWZ           | 2.4           |
| 2DYM           | 2.2           |
| 2DYM           | 2.2           |
| 2DYM           | 2.2           |
| 2DYM           | 2.2           |
| 2DZN           | 2.2           |
| 2E2D           | 2             |
| 2E32           | 3.52          |
| 2E9X           | 2.3           |
| 2E9X           | 2.3           |
| 2E9X           | 2.3           |
| 2E9X           | 2.3           |



| A. PDB CODE | B. INTERFACE CHAINS | C. CHAIN | D. TITLE                                                                               |
|-------------|---------------------|----------|----------------------------------------------------------------------------------------|
| 2E9X        | A F                 | F        | THE CRYSTAL STRUCTURE OF HUMAN GINS CORE COMPLEX                                       |
| 2E9X        | B C                 | C        | THE CRYSTAL STRUCTURE OF HUMAN GINS CORE COMPLEX                                       |
| 2E9X        | B D                 | B        | THE CRYSTAL STRUCTURE OF HUMAN GINS CORE COMPLEX                                       |
| 2E9X        | B D                 | B        | THE CRYSTAL STRUCTURE OF HUMAN GINS CORE COMPLEX                                       |
| 2E9X        | B D                 | B        | THE CRYSTAL STRUCTURE OF HUMAN GINS CORE COMPLEX                                       |
| 2E9X        | B D                 | D        | THE CRYSTAL STRUCTURE OF HUMAN GINS CORE COMPLEX                                       |
| 2E9X        | E G                 | E        | THE CRYSTAL STRUCTURE OF HUMAN GINS CORE COMPLEX                                       |
| 2E9X        | E H                 | E        | THE CRYSTAL STRUCTURE OF HUMAN GINS CORE COMPLEX                                       |
| 2E9X        | E H                 | E        | THE CRYSTAL STRUCTURE OF HUMAN GINS CORE COMPLEX                                       |
| 2E9X        | E H                 | H        | THE CRYSTAL STRUCTURE OF HUMAN GINS CORE COMPLEX                                       |
| 2E9X        | F G                 | F        | THE CRYSTAL STRUCTURE OF HUMAN GINS CORE COMPLEX                                       |
| 2E9X        | F H                 | F        | THE CRYSTAL STRUCTURE OF HUMAN GINS CORE COMPLEX                                       |
| 2E9X        | F H                 | H        | THE CRYSTAL STRUCTURE OF HUMAN GINS CORE COMPLEX                                       |
| 2EFC        | A B                 | A        | ARA7-GDP/ATVPS9A                                                                       |
| 2EFC        | C D                 | D        | ARA7-GDP/ATVPS9A                                                                       |
| 2EHO        | A B                 | A        | CRYSTAL STRUCTURE OF HUMAN GINS COMPLEX                                                |
| 2EHO        | A B                 | A        | CRYSTAL STRUCTURE OF HUMAN GINS COMPLEX                                                |
| 2EHO        | A B                 | B        | CRYSTAL STRUCTURE OF HUMAN GINS COMPLEX                                                |
| 2EHO        | A C                 | A        | CRYSTAL STRUCTURE OF HUMAN GINS COMPLEX                                                |
| 2EHO        | E F                 | F        | CRYSTAL STRUCTURE OF HUMAN GINS COMPLEX                                                |
| 2EHO        | F H                 | F        | CRYSTAL STRUCTURE OF HUMAN GINS COMPLEX                                                |
| 2EHO        | G H                 | G        | CRYSTAL STRUCTURE OF HUMAN GINS COMPLEX                                                |
| 2EHO        | G H                 | H        | CRYSTAL STRUCTURE OF HUMAN GINS COMPLEX                                                |
| 2EHO        | G H                 | H        | CRYSTAL STRUCTURE OF HUMAN GINS COMPLEX                                                |
| 2EHO        | I J                 | I        | CRYSTAL STRUCTURE OF HUMAN GINS COMPLEX                                                |
| 2EHO        | I J                 | J        | CRYSTAL STRUCTURE OF HUMAN GINS COMPLEX                                                |
| 2EHO        | I K                 | I        | CRYSTAL STRUCTURE OF HUMAN GINS COMPLEX                                                |
| 2EHO        | I K                 | K        | CRYSTAL STRUCTURE OF HUMAN GINS COMPLEX                                                |
| 2EHO        | J L                 | J        | CRYSTAL STRUCTURE OF HUMAN GINS COMPLEX                                                |
| 2EKV        | A C                 | C        | THE CRYSTAL STRUCTURE OF RIGOR LIKE SQUID MYOSIN S1 IN THE ABSENCE OF NUCLEOTIDE       |
| 2EQB        | A C                 | A        | CRYSTAL STRUCTURE OF THE RAB GTPASE SEC4P, THE SEC2P GEF DOMAIN, AND PHOSPHATE COMPLEX |
| 2EQB        | A C                 | C        | CRYSTAL STRUCTURE OF THE RAB GTPASE SEC4P, THE SEC2P GEF DOMAIN, AND PHOSPHATE COMPLEX |
| 2ERJ        | B D                 | D        | CRYSTAL STRUCTURE OF THE HETEROTRIMERIC INTERLEUKIN-2 RECEPTOR IN COMPLEX WITH INTERI  |
| 2ERJ        | B D                 | D        | CRYSTAL STRUCTURE OF THE HETEROTRIMERIC INTERLEUKIN-2 RECEPTOR IN COMPLEX WITH INTERI  |
| 2ERJ        | E H                 | H        | CRYSTAL STRUCTURE OF THE HETEROTRIMERIC INTERLEUKIN-2 RECEPTOR IN COMPLEX WITH INTERI  |
| 2ES4        | A D                 | A        | CRYSTAL STRUCTURE OF THE BURKHOLDERIA GLUMAE LIPASE- SPECIFIC FOLDASE IN COMPLEX WITH  |
| 2ES4        | A D                 | D        | CRYSTAL STRUCTURE OF THE BURKHOLDERIA GLUMAE LIPASE- SPECIFIC FOLDASE IN COMPLEX WITH  |
| 2ES4        | A D                 | D        | CRYSTAL STRUCTURE OF THE BURKHOLDERIA GLUMAE LIPASE- SPECIFIC FOLDASE IN COMPLEX WITH  |
| 2ES4        | B E                 | E        | CRYSTAL STRUCTURE OF THE BURKHOLDERIA GLUMAE LIPASE- SPECIFIC FOLDASE IN COMPLEX WITH  |
| 2EY4        | A C                 | A        | CRYSTAL STRUCTURE OF A CBF5-NOP10-GAR1 COMPLEX                                         |
| 2EY4        | B D                 | B        | CRYSTAL STRUCTURE OF A CBF5-NOP10-GAR1 COMPLEX                                         |
| 2EY4        | B F                 | B        | CRYSTAL STRUCTURE OF A CBF5-NOP10-GAR1 COMPLEX                                         |
| 2EY4        | B F                 | F        | CRYSTAL STRUCTURE OF A CBF5-NOP10-GAR1 COMPLEX                                         |
| 2F49        | A C                 | A        | CRYSTAL STRUCTURE OF FUS3 IN COMPLEX WITH A STE5 PEPTIDE                               |
| 2F40        | A B                 | A        | THE MOUSE PNGASE-HR23 COMPLEX REVEALS A COMPLETE REMODULATION OF THE PROTEIN-PROTEI    |
| 2F40        | A B                 | B        | THE MOUSE PNGASE-HR23 COMPLEX REVEALS A COMPLETE REMODULATION OF THE PROTEIN-PROTEI    |
| 2F66        | A B                 | A        | STRUCTURE OF THE ESCRT-I ENDOSOMAL TRAFFICKING COMPLEX                                 |
| 2F66        | A B                 | B        | STRUCTURE OF THE ESCRT-I ENDOSOMAL TRAFFICKING COMPLEX                                 |
| 2F66        | A E                 | A        | STRUCTURE OF THE ESCRT-I ENDOSOMAL TRAFFICKING COMPLEX                                 |
| 2F66        | A E                 | E        | STRUCTURE OF THE ESCRT-I ENDOSOMAL TRAFFICKING COMPLEX                                 |
| 2F66        | D B                 | B        | STRUCTURE OF THE ESCRT-I ENDOSOMAL TRAFFICKING COMPLEX                                 |
| 2F93        | A B                 | A        | K INTERMEDIATE STRUCTURE OF SENSORY RHODOPSIN II/TRANSDUCER COMPLEX IN COMBINATION W   |
| 2F93        | A B                 | B        | K INTERMEDIATE STRUCTURE OF SENSORY RHODOPSIN II/TRANSDUCER COMPLEX IN COMBINATION W   |
| 2F9D        | A P                 | P        | 2.5 ANGSTROM RESOLUTION STRUCTURE OF THE SPLICEOSOMAL PROTEIN P14 BOUND TO REGION OF S |
| 2FCW        | A B                 | A        | STRUCTURE OF A COMPLEX BETWEEN THE PAIR OF THE LDL RECEPTOR LIGAND-BINDING MODULES 3-- |
| 2FCW        | A B                 | A        | STRUCTURE OF A COMPLEX BETWEEN THE PAIR OF THE LDL RECEPTOR LIGAND-BINDING MODULES 3-- |
| 2FEP        | A S                 | S        | STRUCTURE OF TRUNCATED CCPA IN COMPLEX WITH P-SER-HPR AND SULFATE IONS                 |
| 2FF6        | G A                 | G        | CRYSTAL STRUCTURE OF GELSOLIN DOMAIN 1:CIBOULOT DOMAIN 2 HYBRID IN COMPLEX WITH ACTIN  |
| 2FHO        | A B                 | A        | NMR SOLUTION STRUCTURE OF THE HUMAN SPICEOSOMAL PROTEIN COMPLEX P14-SF3B155            |
| 2FHW        | B A                 | B        | SOLUTION STRUCTURE OF HUMAN RELAXIN-3                                                  |
| 2FIF        | A B                 | B        | CRYSTAL STRUCTURE OF A BOVINE RABEX-5 FRAGMENT COMPLEXED WITH UBIQUITIN                |
| 2FK0        | A B                 | B        | CRYSTAL STRUCTURE OF A H5N1 INFLUENZA VIRUS HEMAGGLUTININ.                             |
| 2FK0        | C D                 | D        | CRYSTAL STRUCTURE OF A H5N1 INFLUENZA VIRUS HEMAGGLUTININ.                             |

TABLE S4

Jochim, et al

| A. PDB<br>CODE | E. FUNCTION                            | F. $\Delta\Delta G_{\text{AVG,HELIX}}$<br>(KCAL/MOL) | G. $\Delta\Delta G_{\text{SUM,HELIX}}$<br>(KCAL/MOL) | H. # HOTSPOT<br>RESIDUES | I. HELIX<br>LENGTH |
|----------------|----------------------------------------|------------------------------------------------------|------------------------------------------------------|--------------------------|--------------------|
| 2E9X           | REPLICATION                            | 1.0                                                  | 2.0                                                  | 2                        | 29                 |
| 2E9X           | REPLICATION                            | 1.3                                                  | 4.0                                                  | 3                        | 15                 |
| 2E9X           | REPLICATION                            | 1.9                                                  | 5.7                                                  | 3                        | 9                  |
| 2E9X           | REPLICATION                            | 1.1                                                  | 2.2                                                  | 2                        | 22                 |
| 2E9X           | REPLICATION                            | 1.3                                                  | 2.6                                                  | 2                        | 10                 |
| 2E9X           | REPLICATION                            | 1.5                                                  | 7.5                                                  | 5                        | 18                 |
| 2E9X           | REPLICATION                            | 1.5                                                  | 10.4                                                 | 7                        | 38                 |
| 2E9X           | REPLICATION                            | 1.7                                                  | 5.0                                                  | 3                        | 27                 |
| 2E9X           | REPLICATION                            | 1.2                                                  | 4.7                                                  | 4                        | 38                 |
| 2E9X           | REPLICATION                            | 1.7                                                  | 8.4                                                  | 5                        | 25                 |
| 2E9X           | REPLICATION                            | 1.7                                                  | 3.3                                                  | 2                        | 29                 |
| 2E9X           | REPLICATION                            | 1.2                                                  | 3.6                                                  | 3                        | 9                  |
| 2E9X           | REPLICATION                            | 1.7                                                  | 10.4                                                 | 6                        | 31                 |
| 2EFC           | TRANSPORT PROTEIN                      | 1.6                                                  | 4.8                                                  | 3                        | 16                 |
| 2EFC           | TRANSPORT PROTEIN                      | 1.5                                                  | 2.9                                                  | 2                        | 8                  |
| 2EHO           | REPLICATION                            | 1.3                                                  | 2.6                                                  | 2                        | 13                 |
| 2EHO           | REPLICATION                            | 1.8                                                  | 5.4                                                  | 3                        | 14                 |
| 2EHO           | REPLICATION                            | 1.1                                                  | 2.1                                                  | 2                        | 35                 |
| 2EHO           | REPLICATION                            | 1.5                                                  | 3.0                                                  | 2                        | 7                  |
| 2EHO           | REPLICATION                            | 1.1                                                  | 3.4                                                  | 3                        | 37                 |
| 2EHO           | REPLICATION                            | 1.9                                                  | 11.2                                                 | 6                        | 37                 |
| 2EHO           | REPLICATION                            | 1.8                                                  | 3.6                                                  | 2                        | 10                 |
| 2EHO           | REPLICATION                            | 1.8                                                  | 7.0                                                  | 4                        | 19                 |
| 2EHO           | REPLICATION                            | 1.6                                                  | 4.8                                                  | 3                        | 18                 |
| 2EHO           | REPLICATION                            | 1.5                                                  | 4.4                                                  | 3                        | 14                 |
| 2EHO           | REPLICATION                            | 1.3                                                  | 2.5                                                  | 2                        | 12                 |
| 2EHO           | REPLICATION                            | 1.8                                                  | 5.4                                                  | 3                        | 14                 |
| 2EHO           | REPLICATION                            | 1.6                                                  | 4.7                                                  | 3                        | 10                 |
| 2EHO           | REPLICATION                            | 1.8                                                  | 3.6                                                  | 2                        | 35                 |
| 2EKV           | CONTRACTILE PROTEIN                    | 1.5                                                  | 3.0                                                  | 2                        | 11                 |
| 2EQB           | ENDOCYTOSIS/EXOCYTOSIS                 | 1.9                                                  | 3.8                                                  | 2                        | 6                  |
| 2EQB           | ENDOCYTOSIS/EXOCYTOSIS                 | 1.4                                                  | 2.7                                                  | 2                        | 46                 |
| 2ERJ           | IMMUNE SYSTEM/CYTOKINE                 | 1.2                                                  | 3.5                                                  | 3                        | 17                 |
| 2ERJ           | IMMUNE SYSTEM/CYTOKINE                 | 1.5                                                  | 4.5                                                  | 3                        | 26                 |
| 2ERJ           | IMMUNE SYSTEM/CYTOKINE                 | 1.5                                                  | 3.0                                                  | 2                        | 7                  |
| 2ES4           | HYDROLASE                              | 1.8                                                  | 5.5                                                  | 3                        | 15                 |
| 2ES4           | HYDROLASE                              | 1.2                                                  | 3.7                                                  | 3                        | 10                 |
| 2ES4           | HYDROLASE                              | 1.5                                                  | 3.0                                                  | 2                        | 26                 |
| 2ES4           | HYDROLASE                              | 1.2                                                  | 3.6                                                  | 3                        | 11                 |
| 2EY4           | ISOMERASE/BIOSYNTHETIC PROTEIN         | 1.5                                                  | 3.0                                                  | 2                        | 12                 |
| 2EY4           | ISOMERASE/BIOSYNTHETIC PROTEIN         | 1.8                                                  | 3.5                                                  | 2                        | 13                 |
| 2EY4           | ISOMERASE/BIOSYNTHETIC PROTEIN         | 1.8                                                  | 9.0                                                  | 5                        | 14                 |
| 2EY4           | ISOMERASE/BIOSYNTHETIC PROTEIN         | 1.3                                                  | 2.5                                                  | 2                        | 13                 |
| 2F49           | TRANSFERASE                            | 1.3                                                  | 2.6                                                  | 2                        | 21                 |
| 2F40           | HYDROLASE                              | 1.9                                                  | 5.8                                                  | 3                        | 19                 |
| 2F40           | HYDROLASE                              | 1.3                                                  | 2.6                                                  | 2                        | 12                 |
| 2F66           | TRANSPORT PROTEIN                      | 1.2                                                  | 2.4                                                  | 2                        | 29                 |
| 2F66           | TRANSPORT PROTEIN                      | 1.3                                                  | 2.6                                                  | 2                        | 29                 |
| 2F66           | TRANSPORT PROTEIN                      | 1.5                                                  | 4.4                                                  | 3                        | 29                 |
| 2F66           | TRANSPORT PROTEIN                      | 1.7                                                  | 3.4                                                  | 2                        | 10                 |
| 2F66           | TRANSPORT PROTEIN                      | 1.3                                                  | 2.5                                                  | 2                        | 10                 |
| 2F93           | MEMBRANE PROTEIN                       | 1.6                                                  | 4.9                                                  | 3                        | 33                 |
| 2F93           | MEMBRANE PROTEIN                       | 1.5                                                  | 2.9                                                  | 2                        | 22                 |
| 2F9D           | RNA BINDING PROTEIN                    | 1.3                                                  | 2.6                                                  | 2                        | 16                 |
| 2FCW           | LIPID TRANSPORT/ENDOCYTOSIS/CHAPERONE  | 1.9                                                  | 5.7                                                  | 3                        | 41                 |
| 2FCW           | LIPID TRANSPORT/ENDOCYTOSIS/CHAPERONE  | 1.0                                                  | 2.0                                                  | 2                        | 41                 |
| 2FEP           | TRANSCRIPTION                          | 1.3                                                  | 2.6                                                  | 2                        | 8                  |
| 2FF6           | STRUCTURAL PROTEIN/CONTRACTILE PROTEIN | 1.8                                                  | 7.3                                                  | 4                        | 18                 |
| 2FHO           | RNA BINDING PROTEIN                    | 1.8                                                  | 3.5                                                  | 2                        | 8                  |
| 2FHW           | SIGNALING PROTEIN                      | 1.6                                                  | 3.2                                                  | 2                        | 12                 |
| 2FIF           | PROTEIN TURNOVER/ENDOCYTOSIS           | 1.5                                                  | 2.9                                                  | 2                        | 36                 |
| 2FK0           | VIRAL PROTEIN                          | 1.2                                                  | 3.6                                                  | 3                        | 52                 |
| 2FK0           | VIRAL PROTEIN                          | 1.4                                                  | 2.7                                                  | 2                        | 23                 |

TABLE S4

Jochim, et al

| A. PDB<br>CODE | J. HELIX START<br>RESIDUE # | K. HELIX END<br>RESIDUE # |
|----------------|-----------------------------|---------------------------|
| 2E9X           | 110                         | 138                       |
| 2E9X           | 1131                        | 1145                      |
| 2E9X           | 3                           | 11                        |
| 2E9X           | 150                         | 171                       |
| 2E9X           | 46                          | 55                        |
| 2E9X           | 23                          | 40                        |
| 2E9X           | 58                          | 95                        |
| 2E9X           | 26                          | 52                        |
| 2E9X           | 58                          | 95                        |
| 2E9X           | 124                         | 148                       |
| 2E9X           | 110                         | 138                       |
| 2E9X           | 3                           | 11                        |
| 2E9X           | 73                          | 103                       |
| 2EFC           | 184                         | 199                       |
| 2EFC           | 73                          | 80                        |
| 2EHO           | 136                         | 148                       |
| 2EHO           | 84                          | 97                        |
| 2EHO           | 58                          | 92                        |
| 2EHO           | 73                          | 79                        |
| 2EHO           | 58                          | 94                        |
| 2EHO           | 58                          | 94                        |
| 2EHO           | 157                         | 166                       |
| 2EHO           | 131                         | 149                       |
| 2EHO           | 173                         | 190                       |
| 2EHO           | 84                          | 97                        |
| 2EHO           | 113                         | 124                       |
| 2EHO           | 84                          | 97                        |
| 2EHO           | 46                          | 55                        |
| 2EHO           | 58                          | 92                        |
| 2EKV           | 84                          | 94                        |
| 2EQB           | 49                          | 54                        |
| 2EQB           | 91                          | 136                       |
| 2ERJ           | 82                          | 98                        |
| 2ERJ           | 4                           | 29                        |
| 2ERJ           | 35                          | 41                        |
| 2ES4           | 303                         | 317                       |
| 2ES4           | 320                         | 329                       |
| 2ES4           | 221                         | 246                       |
| 2ES4           | 320                         | 330                       |
| 2EY4           | 183                         | 194                       |
| 2EY4           | 183                         | 195                       |
| 2EY4           | 220                         | 233                       |
| 2EY4           | 42                          | 54                        |
| 2F49           | 111                         | 131                       |
| 2F4O           | 424                         | 442                       |
| 2F4O           | 283                         | 294                       |
| 2F66           | 323                         | 351                       |
| 2F66           | 31                          | 59                        |
| 2F66           | 323                         | 351                       |
| 2F66           | 108                         | 117                       |
| 2F66           | 108                         | 117                       |
| 2F93           | 190                         | 222                       |
| 2F93           | 30                          | 51                        |
| 2F9D           | 380                         | 395                       |
| 2FCW           | 237                         | 277                       |
| 2FCW           | 280                         | 320                       |
| 2FEP           | 47                          | 54                        |
| 2FF6           | 95                          | 112                       |
| 2FHO           | 401                         | 408                       |
| 2FHW           | 12                          | 23                        |
| 2FIF           | 36                          | 71                        |
| 2FK0           | 75                          | 126                       |
| 2FK0           | 38                          | 60                        |

| A. PDB<br>CODE | L. HELIX SEQUENCE                                    |
|----------------|------------------------------------------------------|
| 2E9X           | ADEIRTLVKDMWDTRIAKLRVSADSFVRQ                        |
| 2E9X           | NADISQSLQTFIGR                                       |
| 2E9X           | AAEVEFLAE                                            |
| 2E9X           | LMEINTSGTFLTQALNHMYKLR                               |
| 2E9X           | LWLAINLKQR                                           |
| 2E9X           | PAELIERLEQAWMNEKFA                                   |
| 2E9X           | LIPTIKFRHCSSLRNRRCTVAYLYDRLLRIRALRWEYG               |
| 2E9X           | EDGLRQVLEEMKALYEQNSDVNEAKS                           |
| 2E9X           | LIPTIKFRHCSSLRNRRCTVAYLYDRLLRIRALRWEYG               |
| 2E9X           | PEELAFAREFMANTESYLKNVALKH                            |
| 2E9X           | ADEIRTLVKDMWDTRIAKLRVSADSFVRQ                        |
| 2E9X           | AAEVEFLAE                                            |
| 2E9X           | LKVSIIHQMEMERIRYVLSYLRCRLMKIEKF                      |
| 2EFC           | ADEFPLVLIYVTIKAN                                     |
| 2EFC           | HSLAPMY                                              |
| 2EHO           | NTESYLKNVALKH                                        |
| 2EHO           | RIRYVLSYLRCRL                                        |
| 2EHO           | LIPTIKFRHCSSLRNRRCTVAYLYDRLLRIRALRW                  |
| 2EHO           | LKVSIIHQ                                             |
| 2EHO           | LIPTIKFRHCSSLRNRRCTVAYLYDRLLRIRALRWEY                |
| 2EHO           | LIPTIKFRHCSSLRNRRCTVAYLYDRLLRIRALRWEY                |
| 2EHO           | GTFLTQALNH                                           |
| 2EHO           | NADISQSLQTFIGRFRI                                    |
| 2EHO           | RGLFQTGQKGLNDFQCWE                                   |
| 2EHO           | RIRYVLSYLRCRL                                        |
| 2EHO           | WFNNYKRSLATY                                         |
| 2EHO           | RIRYVLSYLRCRL                                        |
| 2EHO           | LWLAINLKQR                                           |
| 2EHO           | LIPTIKFRHCSSLRNRRCTVAYLYDRLLRIRALRW                  |
| 2EKV           | ADEFMEAFKTF                                          |
| 2EQB           | FITTIG                                               |
| 2EQB           | EEEADKLNKEVEDLTASLFDEANNMVADARKEKYAIEILNKRLTEQ       |
| 2ERJ           | PRDLISNINVIVLELKG                                    |
| 2ERJ           | SSSTKKTQLQLEHLLLDLQMLNGIN                            |
| 2ERJ           | KLTRMLT                                              |
| 2ES4           | PVAVIRTHVNRLKLQ                                      |
| 2ES4           | EAIRAASLDR                                           |
| 2ES4           | PDERAQAALHAQQDAVTKIADLQKA                            |
| 2ES4           | EAIRAASLDRG                                          |
| 2EY4           | IRSLIHHIGLAL                                         |
| 2EY4           | IRSLIHHIGLALG                                        |
| 2EY4           | LHDLVDYYYFWKED                                       |
| 2EY4           | GEYRRRWKREVLG                                        |
| 2F49           | DDHIQYFIYQTLRAVKVLHGS                                |
| 2F40           | ESRRKELLQRIIVELVEFI                                  |
| 2F40           | PQFQQMRQIIQQ                                         |
| 2F66           | DGLNQLYNLVAQDYALTDTIEALSRLHR                         |
| 2F66           | SKDKEVIETLSEIYSIVITLDHVEKAYLK                        |
| 2F66           | DGLNQLYNLVAQDYALTDTIEALSRLHR                         |
| 2F66           | ASNAITRLER                                           |
| 2F66           | ASNAITRLER                                           |
| 2F93           | PTVDVALIVYLDLVTKVGFIALDAAATLRAE                      |
| 2F93           | GALTVLFGAIAYGEVTAATAATG                              |
| 2F9D           | PEQLQAWRWEREIDER                                     |
| 2FCW           | DKELEAFREELKHFEAKIEKHNHYQKQLEIAHEKLRHAESV            |
| 2FCW           | GERVSRREKHALLEGRTKELGYTVKKHLQDLSGRISRARH             |
| 2FEP           | IMGVMSLG                                             |
| 2FF6           | QDESGAAAIFTVQLDDYL                                   |
| 2FHO           | DEELDAMF                                             |
| 2FHW           | REFIRAVIFTCG                                         |
| 2FIF           | SKCWREYYHKARQKQIQEDWELAERLQREEEAFAS                  |
| 2FK0           | RRIENLNKKMEDGFLDVWTYNAELLVLMENERTLDFHDSNVKNLYDKVRLQL |
| 2FK0           | KESTQKAIDGVTNKVNSIIDKMN                              |



| A. PDB CODE | B. INTERFACE CHAINS | C. CHAIN | D. TITLE                                                                                 |
|-------------|---------------------|----------|------------------------------------------------------------------------------------------|
| 2FK0        | C F                 | C        | CRYSTAL STRUCTURE OF A H5N1 INFLUENZA VIRUS HEMAGGLUTININ.                               |
| 2FK0        | E F                 | F        | CRYSTAL STRUCTURE OF A H5N1 INFLUENZA VIRUS HEMAGGLUTININ.                               |
| 2FK0        | G H                 | H        | CRYSTAL STRUCTURE OF A H5N1 INFLUENZA VIRUS HEMAGGLUTININ.                               |
| 2FK0        | I J                 | J        | CRYSTAL STRUCTURE OF A H5N1 INFLUENZA VIRUS HEMAGGLUTININ.                               |
| 2FK0        | K L                 | L        | CRYSTAL STRUCTURE OF A H5N1 INFLUENZA VIRUS HEMAGGLUTININ.                               |
| 2FKW        | A B                 | B        | STRUCTURE OF LH2 FROM RPS. ACIDOPHILA CRYSTALLIZED IN LIPIDIC MESOPHASES                 |
| 2FKW        | E F                 | F        | STRUCTURE OF LH2 FROM RPS. ACIDOPHILA CRYSTALLIZED IN LIPIDIC MESOPHASES                 |
| 2FKW        | O P                 | P        | STRUCTURE OF LH2 FROM RPS. ACIDOPHILA CRYSTALLIZED IN LIPIDIC MESOPHASES                 |
| 2FKW        | R S                 | S        | STRUCTURE OF LH2 FROM RPS. ACIDOPHILA CRYSTALLIZED IN LIPIDIC MESOPHASES                 |
| 2FM8        | B C                 | B        | CRYSTAL STRUCTURE OF THE SALMONELLA SECRETION CHAPERONE INV B IN COMPLEX WITH SIPA       |
| 2FNJ        | B C                 | C        | CRYSTAL STRUCTURE OF A B30.2/SPRY DOMAIN-CONTAINING PROTEIN GUSTAVUS IN COMPLEX WITH E   |
| 2FO1        | A D                 | D        | CRYSTAL STRUCTURE OF THE CSL-NOTCH-MASTERMIND TERNARY COMPLEX BOUND TO DNA               |
| 2FO1        | A C                 | A        | SYNTHESIS, BIOLOGICAL ACTIVITY, AND X-RAY CRYSTAL STRUCTURAL ANALYSIS OF DIARYL ETHER IN |
| 2FO1        | A C                 | C        | SYNTHESIS, BIOLOGICAL ACTIVITY, AND X-RAY CRYSTAL STRUCTURAL ANALYSIS OF DIARYL ETHER IN |
| 2FRV        | A B                 | A        | CRYSTAL STRUCTURE OF THE OXIDIZED FORM OF NI-FE HYDROGENASE                              |
| 2FRV        | A B                 | B        | CRYSTAL STRUCTURE OF THE OXIDIZED FORM OF NI-FE HYDROGENASE                              |
| 2FRV        | A B                 | B        | CRYSTAL STRUCTURE OF THE OXIDIZED FORM OF NI-FE HYDROGENASE                              |
| 2FRV        | C D                 | C        | CRYSTAL STRUCTURE OF THE OXIDIZED FORM OF NI-FE HYDROGENASE                              |
| 2FRV        | C D                 | D        | CRYSTAL STRUCTURE OF THE OXIDIZED FORM OF NI-FE HYDROGENASE                              |
| 2FRV        | E F                 | E        | CRYSTAL STRUCTURE OF THE OXIDIZED FORM OF NI-FE HYDROGENASE                              |
| 2FRV        | E F                 | F        | CRYSTAL STRUCTURE OF THE OXIDIZED FORM OF NI-FE HYDROGENASE                              |
| 2FRV        | G H                 | G        | CRYSTAL STRUCTURE OF THE OXIDIZED FORM OF NI-FE HYDROGENASE                              |
| 2FRV        | G H                 | H        | CRYSTAL STRUCTURE OF THE OXIDIZED FORM OF NI-FE HYDROGENASE                              |
| 2FRV        | I J                 | I        | CRYSTAL STRUCTURE OF THE OXIDIZED FORM OF NI-FE HYDROGENASE                              |
| 2FRV        | I J                 | J        | CRYSTAL STRUCTURE OF THE OXIDIZED FORM OF NI-FE HYDROGENASE                              |
| 2FRV        | S L                 | L        | CRYSTAL STRUCTURE OF THE OXIDIZED FORM OF NI-FE HYDROGENASE                              |
| 2FRV        | S L                 | S        | CRYSTAL STRUCTURE OF THE OXIDIZED FORM OF NI-FE HYDROGENASE                              |
| 2FTK        | B F                 | B        | BERYLLOFLOURIDE SPO0F COMPLEX WITH SPO0B                                                 |
| 2FUG        | 4 5                 | 5        | CRYSTAL STRUCTURE OF THE HYDROPHILIC DOMAIN OF RESPIRATORY COMPLEX I FROM THERMUS TH     |
| 2FUG        | 4 9                 | 4        | CRYSTAL STRUCTURE OF THE HYDROPHILIC DOMAIN OF RESPIRATORY COMPLEX I FROM THERMUS TH     |
| 2FUG        | 9 7                 | 7        | CRYSTAL STRUCTURE OF THE HYDROPHILIC DOMAIN OF RESPIRATORY COMPLEX I FROM THERMUS TH     |
| 2FUG        | A B                 | B        | CRYSTAL STRUCTURE OF THE HYDROPHILIC DOMAIN OF RESPIRATORY COMPLEX I FROM THERMUS TH     |
| 2FUG        | A C                 | A        | CRYSTAL STRUCTURE OF THE HYDROPHILIC DOMAIN OF RESPIRATORY COMPLEX I FROM THERMUS TH     |
| 2FUG        | D E                 | E        | CRYSTAL STRUCTURE OF THE HYDROPHILIC DOMAIN OF RESPIRATORY COMPLEX I FROM THERMUS TH     |
| 2FUG        | S U                 | S        | CRYSTAL STRUCTURE OF THE HYDROPHILIC DOMAIN OF RESPIRATORY COMPLEX I FROM THERMUS TH     |
| 2FUG        | T U                 | T        | CRYSTAL STRUCTURE OF THE HYDROPHILIC DOMAIN OF RESPIRATORY COMPLEX I FROM THERMUS TH     |
| 2FUG        | U V                 | V        | CRYSTAL STRUCTURE OF THE HYDROPHILIC DOMAIN OF RESPIRATORY COMPLEX I FROM THERMUS TH     |
| 2FV4        | A B                 | A        | NMR SOLUTION STRUCTURE OF THE YEAST KINETOCHORE SPC24/SPC25 GLOBULAR DOMAIN              |
| 2FV4        | A B                 | B        | NMR SOLUTION STRUCTURE OF THE YEAST KINETOCHORE SPC24/SPC25 GLOBULAR DOMAIN              |
| 2G2U        | A B                 | A        | CRYSTAL STRUCTURE OF THE SHV-1 BETA-LACTAMASE/BETA-LACTAMASE INHIBITOR PROTEIN (BLIP) C  |
| 2G38        | A B                 | B        | A PE/PPE PROTEIN COMPLEX FROM MYCOBACTERIUM TUBERCULOSIS                                 |
| 2G38        | C D                 | C        | A PE/PPE PROTEIN COMPLEX FROM MYCOBACTERIUM TUBERCULOSIS                                 |
| 2G38        | C D                 | D        | A PE/PPE PROTEIN COMPLEX FROM MYCOBACTERIUM TUBERCULOSIS                                 |
| 2G38        | C D                 | D        | A PE/PPE PROTEIN COMPLEX FROM MYCOBACTERIUM TUBERCULOSIS                                 |
| 2G4D        | A B                 | A        | CRYSTAL STRUCTURE OF HUMAN SENP1 MUTANT (C603S) IN COMPLEX WITH SUMO-1                   |
| 2G4D        | C D                 | C        | CRYSTAL STRUCTURE OF HUMAN SENP1 MUTANT (C603S) IN COMPLEX WITH SUMO-1                   |
| 2G77        | A B                 | A        | CRYSTAL STRUCTURE OF GYP1 TBC DOMAIN IN COMPLEX WITH RAB33 GTPASE BOUND TO GDP AND AL    |
| 2GEZ        | A B                 | A        | CRYSTAL STRUCTURE OF POTASSIUM-INDEPENDENT PLANT ASPARAGINASE                            |
| 2GEZ        | A D                 | D        | CRYSTAL STRUCTURE OF POTASSIUM-INDEPENDENT PLANT ASPARAGINASE                            |
| 2GEZ        | C D                 | C        | CRYSTAL STRUCTURE OF POTASSIUM-INDEPENDENT PLANT ASPARAGINASE                            |
| 2GGM        | A C                 | A        | HUMAN CENTRIN 2 XERODERMA PIGMENTOSUM GROUP C PROTEIN COMPLEX                            |
| 2GGM        | B D                 | B        | HUMAN CENTRIN 2 XERODERMA PIGMENTOSUM GROUP C PROTEIN COMPLEX                            |
| 2GGP        | A B                 | A        | SOLUTION STRUCTURE OF THE ATX1-CU(I)-CCC2A COMPLEX                                       |
| 2GL7        | A B                 | A        | CRYSTAL STRUCTURE OF A BETA-CATENIN/BCL9/TCF4 COMPLEX                                    |
| 2GL7        | A B                 | B        | CRYSTAL STRUCTURE OF A BETA-CATENIN/BCL9/TCF4 COMPLEX                                    |
| 2GL7        | A C                 | C        | CRYSTAL STRUCTURE OF A BETA-CATENIN/BCL9/TCF4 COMPLEX                                    |
| 2GL7        | D E                 | D        | CRYSTAL STRUCTURE OF A BETA-CATENIN/BCL9/TCF4 COMPLEX                                    |
| 2GL7        | D E                 | D        | CRYSTAL STRUCTURE OF A BETA-CATENIN/BCL9/TCF4 COMPLEX                                    |
| 2GL7        | D E                 | D        | CRYSTAL STRUCTURE OF A BETA-CATENIN/BCL9/TCF4 COMPLEX                                    |
| 2GL7        | D F                 | F        | CRYSTAL STRUCTURE OF A BETA-CATENIN/BCL9/TCF4 COMPLEX                                    |
| 2GOO        | A B                 | A        | TERNARY COMPLEX OF BMP-2 BOUND TO BMPR-IA-ECD AND ACTRII-ECD                             |
| 2GOX        | A B                 | B        | CRYSTAL STRUCTURE OF EFB-C / C3D COMPLEX                                                 |
| 2GPP        | B D                 | B        | ESTROGEN RELATED RECEPTOR-GAMMA LIGAND BINDING DOMAIN COMPLEXED WITH A RIP140 PEPTII     |

TABLE S4

Jochim, et al

| A. PDB<br>CODE | E. FUNCTION                           | F. $\Delta\Delta G_{\text{AVG,HELIX}}$<br>(KCAL/MOL) | G. $\Delta\Delta G_{\text{SUM,HELIX}}$<br>(KCAL/MOL) | H. # HOTSPOT<br>RESIDUES | I. HELIX<br>LENGTH |
|----------------|---------------------------------------|------------------------------------------------------|------------------------------------------------------|--------------------------|--------------------|
| 2FK0           | VIRAL PROTEIN                         | 1.7                                                  | 3.4                                                  | 2                        | 8                  |
| 2FK0           | VIRAL PROTEIN                         | 1.3                                                  | 4.0                                                  | 3                        | 23                 |
| 2FK0           | VIRAL PROTEIN                         | 1.1                                                  | 2.1                                                  | 2                        | 23                 |
| 2FK0           | VIRAL PROTEIN                         | 1.4                                                  | 2.8                                                  | 2                        | 23                 |
| 2FK0           | VIRAL PROTEIN                         | 1.6                                                  | 4.7                                                  | 3                        | 23                 |
| 2FKW           | MEMBRANE PROTEIN, PHOTOSYNTHESIS      | 1.9                                                  | 3.8                                                  | 2                        | 32                 |
| 2FKW           | MEMBRANE PROTEIN, PHOTOSYNTHESIS      | 1.7                                                  | 3.3                                                  | 2                        | 32                 |
| 2FKW           | MEMBRANE PROTEIN, PHOTOSYNTHESIS      | 1.5                                                  | 2.9                                                  | 2                        | 32                 |
| 2FKW           | MEMBRANE PROTEIN, PHOTOSYNTHESIS      | 1.8                                                  | 3.6                                                  | 2                        | 32                 |
| 2FM8           | CHAPERONE/CELL INVASION               | 1.4                                                  | 2.8                                                  | 2                        | 22                 |
| 2FNJ           | PROTEIN TRANSPORT/SIGNALING PROTEIN   | 1.8                                                  | 7.3                                                  | 4                        | 17                 |
| 2FO1           | GENE REGULATION/SIGNALING PROTEIN/DNA | 1.7                                                  | 3.4                                                  | 2                        | 22                 |
| 2FO1           | OXIDOREDUCTASE                        | 1.3                                                  | 3.9                                                  | 3                        | 12                 |
| 2FO1           | OXIDOREDUCTASE                        | 1.8                                                  | 3.6                                                  | 2                        | 13                 |
| 2FRV           | OXIDOREDUCTASE                        | 1.2                                                  | 2.3                                                  | 2                        | 9                  |
| 2FRV           | OXIDOREDUCTASE                        | 1.2                                                  | 2.4                                                  | 2                        | 29                 |
| 2FRV           | OXIDOREDUCTASE                        | 1.6                                                  | 4.9                                                  | 3                        | 10                 |
| 2FRV           | OXIDOREDUCTASE                        | 1.2                                                  | 2.3                                                  | 2                        | 9                  |
| 2FRV           | OXIDOREDUCTASE                        | 1.2                                                  | 2.4                                                  | 2                        | 29                 |
| 2FRV           | OXIDOREDUCTASE                        | 1.2                                                  | 2.4                                                  | 2                        | 9                  |
| 2FRV           | OXIDOREDUCTASE                        | 1.2                                                  | 2.3                                                  | 2                        | 29                 |
| 2FRV           | OXIDOREDUCTASE                        | 1.2                                                  | 2.4                                                  | 2                        | 9                  |
| 2FRV           | OXIDOREDUCTASE                        | 1.2                                                  | 2.4                                                  | 2                        | 29                 |
| 2FRV           | OXIDOREDUCTASE                        | 1.7                                                  | 3.4                                                  | 2                        | 9                  |
| 2FRV           | OXIDOREDUCTASE                        | 1.2                                                  | 2.4                                                  | 2                        | 29                 |
| 2FRV           | OXIDOREDUCTASE                        | 1.2                                                  | 2.4                                                  | 2                        | 29                 |
| 2FRV           | OXIDOREDUCTASE                        | 1.2                                                  | 2.3                                                  | 2                        | 9                  |
| 2FTK           | TRANSFERASE                           | 1.2                                                  | 2.4                                                  | 2                        | 31                 |
| 2FUG           | OXIDOREDUCTASE                        | 1.4                                                  | 4.3                                                  | 3                        | 11                 |
| 2FUG           | OXIDOREDUCTASE                        | 1.4                                                  | 2.7                                                  | 2                        | 14                 |
| 2FUG           | OXIDOREDUCTASE                        | 1.3                                                  | 2.6                                                  | 2                        | 5                  |
| 2FUG           | OXIDOREDUCTASE                        | 1.6                                                  | 3.2                                                  | 2                        | 5                  |
| 2FUG           | OXIDOREDUCTASE                        | 1.1                                                  | 2.1                                                  | 2                        | 16                 |
| 2FUG           | OXIDOREDUCTASE                        | 1.5                                                  | 6.0                                                  | 4                        | 11                 |
| 2FUG           | OXIDOREDUCTASE                        | 1.1                                                  | 2.2                                                  | 2                        | 19                 |
| 2FUG           | OXIDOREDUCTASE                        | 1.1                                                  | 3.2                                                  | 3                        | 11                 |
| 2FUG           | OXIDOREDUCTASE                        | 1.8                                                  | 8.8                                                  | 5                        | 10                 |
| 2FV4           | STRUCTURAL PROTEIN, PROTEIN BINDING   | 1.2                                                  | 3.7                                                  | 3                        | 16                 |
| 2FV4           | STRUCTURAL PROTEIN, PROTEIN BINDING   | 1.7                                                  | 3.4                                                  | 2                        | 13                 |
| 2G2U           | HYDROLASE/HYDROLASE INHIBITOR         | 1.1                                                  | 2.2                                                  | 2                        | 6                  |
| 2G38           | STRUCTURAL GENOMICS, UNKNOWN FUNCTION | 1.8                                                  | 3.6                                                  | 2                        | 35                 |
| 2G38           | STRUCTURAL GENOMICS, UNKNOWN FUNCTION | 1.4                                                  | 2.7                                                  | 2                        | 28                 |
| 2G38           | STRUCTURAL GENOMICS, UNKNOWN FUNCTION | 1.9                                                  | 5.6                                                  | 3                        | 31                 |
| 2G38           | STRUCTURAL GENOMICS, UNKNOWN FUNCTION | 1.3                                                  | 4.0                                                  | 3                        | 45                 |
| 2G4D           | HYDROLASE/PROTEIN BINDING             | 1.7                                                  | 3.4                                                  | 2                        | 7                  |
| 2G4D           | HYDROLASE/PROTEIN BINDING             | 1.6                                                  | 3.1                                                  | 2                        | 15                 |
| 2G77           | HYDROLASE ACTIVATOR/PROTEIN TRANSPORT | 1.9                                                  | 3.7                                                  | 2                        | 10                 |
| 2GEZ           | HYDROLASE                             | 1.5                                                  | 5.9                                                  | 4                        | 15                 |
| 2GEZ           | HYDROLASE                             | 1.4                                                  | 2.7                                                  | 2                        | 7                  |
| 2GEZ           | HYDROLASE                             | 1.9                                                  | 7.5                                                  | 4                        | 24                 |
| 2GGM           | CELL CYCLE                            | 1.2                                                  | 2.3                                                  | 2                        | 11                 |
| 2GGM           | CELL CYCLE                            | 1.0                                                  | 2.0                                                  | 2                        | 11                 |
| 2GGP           | CHAPERONE, METAL TRANSPORT            | 1.2                                                  | 2.4                                                  | 2                        | 12                 |
| 2GL7           | TRANSCRIPTION                         | 1.8                                                  | 3.5                                                  | 2                        | 16                 |
| 2GL7           | TRANSCRIPTION                         | 1.8                                                  | 7.3                                                  | 4                        | 11                 |
| 2GL7           | TRANSCRIPTION                         | 1.6                                                  | 4.9                                                  | 3                        | 22                 |
| 2GL7           | TRANSCRIPTION                         | 1.7                                                  | 3.4                                                  | 2                        | 17                 |
| 2GL7           | TRANSCRIPTION                         | 1.6                                                  | 3.1                                                  | 2                        | 17                 |
| 2GL7           | TRANSCRIPTION                         | 1.1                                                  | 2.1                                                  | 2                        | 17                 |
| 2GL7           | TRANSCRIPTION                         | 1.3                                                  | 2.5                                                  | 2                        | 14                 |
| 2GOO           | TRANSFERASE                           | 1.4                                                  | 2.8                                                  | 2                        | 13                 |
| 2GOX           | CELL ADHESION/TOXIN                   | 1.6                                                  | 6.4                                                  | 4                        | 14                 |
| 2GPP           | TRANSCRIPTION                         | 1.5                                                  | 2.9                                                  | 2                        | 8                  |

TABLE S4

Jochim, et al

| A. PDB<br>CODE | J. HELIX START<br>RESIDUE # | K. HELIX END<br>RESIDUE # |
|----------------|-----------------------------|---------------------------|
| 2FK0           | 105                         | 112                       |
| 2FK0           | 38                          | 60                        |
| 2FK0           | 38                          | 60                        |
| 2FK0           | 38                          | 60                        |
| 2FK0           | 38                          | 60                        |
| 2FKW           | 5                           | 36                        |
| 2FKW           | 5                           | 36                        |
| 2FKW           | 5                           | 36                        |
| 2FKW           | 5                           | 36                        |
| 2FM8           | 112                         | 133                       |
| 2FNJ           | 67                          | 83                        |
| 2FO1           | 85                          | 106                       |
| 2FO1           | 111                         | 122                       |
| 2FO1           | 368                         | 380                       |
| 2FRV           | 19                          | 27                        |
| 2FRV           | 186                         | 214                       |
| 2FRV           | 54                          | 63                        |
| 2FRV           | 19                          | 27                        |
| 2FRV           | 186                         | 214                       |
| 2FRV           | 19                          | 27                        |
| 2FRV           | 186                         | 214                       |
| 2FRV           | 19                          | 27                        |
| 2FRV           | 186                         | 214                       |
| 2FRV           | 19                          | 27                        |
| 2FRV           | 186                         | 214                       |
| 2FRV           | 19                          | 27                        |
| 2FRV           | 186                         | 214                       |
| 2FRV           | 19                          | 27                        |
| 2FRV           | 186                         | 214                       |
| 2FRV           | 19                          | 27                        |
| 2FTK           | 215                         | 245                       |
| 2FUG           | 115                         | 125                       |
| 2FUG           | 151                         | 164                       |
| 2FUG           | 38                          | 42                        |
| 2FUG           | 86                          | 90                        |
| 2FUG           | 381                         | 396                       |
| 2FUG           | 115                         | 125                       |
| 2FUG           | 357                         | 375                       |
| 2FUG           | 57                          | 67                        |
| 2FUG           | 324                         | 333                       |
| 2FV4           | 206                         | 221                       |
| 2FV4           | 200                         | 212                       |
| 2G2U           | 107                         | 112                       |
| 2G38           | 69                          | 103                       |
| 2G38           | 10                          | 37                        |
| 2G38           | 22                          | 52                        |
| 2G38           | 59                          | 103                       |
| 2G4D           | 454                         | 460                       |
| 2G4D           | 468                         | 482                       |
| 2G77           | 595                         | 604                       |
| 2GEZ           | 48                          | 62                        |
| 2GEZ           | 246                         | 252                       |
| 2GEZ           | 21                          | 44                        |
| 2GGM           | 123                         | 133                       |
| 2GGM           | 123                         | 133                       |
| 2GGP           | 53                          | 64                        |
| 2GL7           | 291                         | 306                       |
| 2GL7           | 39                          | 49                        |
| 2GL7           | 353                         | 374                       |
| 2GL7           | 249                         | 265                       |
| 2GL7           | 375                         | 391                       |
| 2GL7           | 504                         | 520                       |
| 2GL7           | 356                         | 369                       |
| 2GOO           | 59                          | 71                        |
| 2GOX           | 127                         | 140                       |
| 2GPP           | 448                         | 455                       |



| A. PDB<br>CODE | L. HELIX SEQUENCE                             |
|----------------|-----------------------------------------------|
| 2FK0           | YEELKHLL                                      |
| 2FK0           | KESTQKAIDGVTNKVNSIIDKMN                       |
| 2FK0           | KESTQKAIDGVTNKVNSIIDKMN                       |
| 2FK0           | KESTQKAIDGVTNKVNSIIDKMN                       |
| 2FK0           | KESTQKAIDGVTNKVNSIIDKMN                       |
| 2FKW           | AEQSEELHKYVIDGTRVFLGLALVAHFLAFSA              |
| 2FKW           | AEQSEELHKYVIDGTRVFLGLALVAHFLAFSA              |
| 2FKW           | AEQSEELHKYVIDGTRVFLGLALVAHFLAFSA              |
| 2FKW           | AEQSEELHKYVIDGTRVFLGLALVAHFLAFSA              |
| 2FM8           | GEKFSTALNGFYNYLEVFSRSL                        |
| 2FNJ           | SHVLSKVCMYFTYKVRV                             |
| 2FO1           | RPEMIANQRAVTAHLFNRYTED                        |
| 2FO1           | YGWGIAKELSKR                                  |
| 2FO1           | FIDYAIEYSEKYA                                 |
| 2FRV           | GCSSEVLRT                                     |
| 2FRV           | AEVDLIATAHYLEALRVQVKAARAMAIFG                 |
| 2FRV           | PRDAQHFTQR                                    |
| 2FRV           | GCSSEVLRT                                     |
| 2FRV           | AEVDLIATAHYLEALRVQVKAARAMAIFG                 |
| 2FRV           | GCSSEVLRT                                     |
| 2FRV           | AEVDLIATAHYLEALRVQVKAARAMAIFG                 |
| 2FRV           | GCSSEVLRT                                     |
| 2FRV           | AEVDLIATAHYLEALRVQVKAARAMAIFG                 |
| 2FRV           | GCSSEVLRT                                     |
| 2FRV           | AEVDLIATAHYLEALRVQVKAARAMAIFG                 |
| 2FRV           | GCSSEVLRT                                     |
| 2FRV           | AEVDLIATAHYLEALRVQVKAARAMAIFG                 |
| 2FRV           | GCSSEVLRT                                     |
| 2FRV           | AEVDLIATAHYLEALRVQVKAARAMAIFG                 |
| 2FRV           | GCSSEVLRT                                     |
| 2FTK           | TALTNELIHLHGSRHDWMNKLQLIKGNLSL                |
| 2FUG           | EREVYDLFGIV                                   |
| 2FUG           | RERETILDLEFWVT                                |
| 2FUG           | PDFIY                                         |
| 2FUG           | LCKL                                          |
| 2FUG           | EKDVENLEALLPLIEG                              |
| 2FUG           | EREVYDLFGIV                                   |
| 2FUG           | TPCREGVAGFMVNLFAKIG                           |
| 2FUG           | PTEVMGVASFY                                   |
| 2FUG           | VIIHFKHYTE                                    |
| 2FV4           | LA AFLV VARDMLLASL                            |
| 2FV4           | DFYKTKYIWERLG                                 |
| 2G2U           | PVSEKH                                        |
| 2G38           | KPFVRWLTDL CVQLSEVERQIHEIVRAYEWAHHD           |
| 2G38           | ALTVAATEVRRIRDRAIQSDAQVAPMTT                  |
| 2G38           | DSMLAAARAWRSLDVEMTAVQRSFNRTLLSL               |
| 2G38           | PVVMQLMEAAKPFVRWLTDL CVQLSEVERQIHEIVRAYEWAHHD |
| 2G4D           | RKDIQTL                                       |
| 2G4D           | DEIINFYMNMLMERS                               |
| 2G77           | FQETITFLQN                                    |
| 2GEZ           | PLDVVELVVRELENI                               |
| 2GEZ           | GEEIIRA                                       |
| 2GEZ           | PERRKPREEGLRHCLQIGVEALKA                      |
| 2GGM           | FKNLKRVAKEL                                   |
| 2GGM           | FKNLKRVAKEL                                   |
| 2GGP           | YDFILEKIKKTG                                  |
| 2GL7           | VKFLAITTDCLQLAY                               |
| 2GL7           | RD LADVKSSLV                                  |
| 2GL7           | QEQLHRERSLQTLRDIQRMLF                         |
| 2GL7           | DSVLFYAITLHNLHLLH                             |
| 2GL7           | QRLVQNCLWTLRNLSDA                             |
| 2GL7           | WPLIKATVGLIRNLALC                             |
| 2GL7           | LEHRERSLQTLRDI                                |
| 2GOO           | NHAI VQTLVNSVN                                |
| 2GOX           | VSAHRKAQKAVNLV                                |
| 2GPP           | KLFLEMLE                                      |

| A. PDB<br>CODE | M. RESOLUTION |
|----------------|---------------|
| 2FK0           | 2.95          |
| 2FK0           | 2.95          |
| 2FK0           | 2.95          |
| 2FK0           | 2.95          |
| 2FK0           | 2.95          |
| 2FKW           | 2.45          |
| 2FKW           | 2.45          |
| 2FKW           | 2.45          |
| 2FKW           | 2.45          |
| 2FM8           | 2.2           |
| 2FNJ           | 1.8           |
| 2FO1           | 3.12          |
| 2FO1           | 2.5           |
| 2FO1           | 2.5           |
| 2FRV           | 2.54          |
| 2FRV           | 2.54          |
| 2FRV           | 2.54          |
| 2FRV           | 2.54          |
| 2FRV           | 2.54          |
| 2FRV           | 2.54          |
| 2FRV           | 2.54          |
| 2FRV           | 2.54          |
| 2FRV           | 2.54          |
| 2FRV           | 2.54          |
| 2FRV           | 2.54          |
| 2FRV           | 2.54          |
| 2FRV           | 2.54          |
| 2FRV           | 2.54          |
| 2FRV           | 2.54          |
| 2FTK           | 3.05          |
| 2FUG           | 3.3           |
| 2FUG           | 3.3           |
| 2FUG           | 3.3           |
| 2FUG           | 3.3           |
| 2FUG           | 3.3           |
| 2FUG           | 3.3           |
| 2FUG           | 3.3           |
| 2FUG           | 3.3           |
| 2FV4           | NOT APP       |
| 2FV4           | NOT APP       |
| 2G2U           | 1.6           |
| 2G38           | 2.2           |
| 2G38           | 2.2           |
| 2G38           | 2.2           |
| 2G38           | 2.2           |
| 2G4D           | 2.8           |
| 2G4D           | 2.8           |
| 2G77           | 2.26          |
| 2GEZ           | 2.6           |
| 2GEZ           | 2.6           |
| 2GEZ           | 2.6           |
| 2GGM           | 2.35          |
| 2GGM           | 2.35          |
| 2GGP           | NOT APP       |
| 2GL7           | 2.6           |
| 2GL7           | 2.6           |
| 2GL7           | 2.6           |
| 2GL7           | 2.6           |
| 2GL7           | 2.6           |
| 2GL7           | 2.6           |
| 2GL7           | 2.6           |
| 2GOO           | 2.2           |
| 2GOX           | 2.2           |
| 2GPP           | 2.6           |

| A. PDB CODE | B. INTERFACE CHAINS | C. CHAIN | D. TITLE                                                                                  |
|-------------|---------------------|----------|-------------------------------------------------------------------------------------------|
| 2GPP        | B D                 | B        | ESTROGEN RELATED RECEPTOR-GAMMA LIGAND BINDING DOMAIN COMPLEXED WITH A RIP140 PEPTII      |
| 2GPP        | B D                 | D        | ESTROGEN RELATED RECEPTOR-GAMMA LIGAND BINDING DOMAIN COMPLEXED WITH A RIP140 PEPTII      |
| 2GPV        | B H                 | H        | ESTROGEN RELATED RECEPTOR-GAMMA LIGAND BINDING DOMAIN COMPLEXED WITH 4-HYDROXY-TA         |
| 2GTP        | A D                 | D        | CRYSTAL STRUCTURE OF THE HETERODIMERIC COMPLEX OF HUMAN RGS1 AND ACTIVATED GI ALPHA       |
| 2GTP        | B C                 | B        | CRYSTAL STRUCTURE OF THE HETERODIMERIC COMPLEX OF HUMAN RGS1 AND ACTIVATED GI ALPHA       |
| 2GTP        | B C                 | C        | CRYSTAL STRUCTURE OF THE HETERODIMERIC COMPLEX OF HUMAN RGS1 AND ACTIVATED GI ALPHA       |
| 2GV5        | A C                 | A        | CRYSTAL STRUCTURE OF SFI1P/CDC31P COMPLEX                                                 |
| 2GV5        | B C                 | B        | CRYSTAL STRUCTURE OF SFI1P/CDC31P COMPLEX                                                 |
| 2GV5        | B C                 | C        | CRYSTAL STRUCTURE OF SFI1P/CDC31P COMPLEX                                                 |
| 2GV5        | B C                 | C        | CRYSTAL STRUCTURE OF SFI1P/CDC31P COMPLEX                                                 |
| 2GV5        | D F                 | D        | CRYSTAL STRUCTURE OF SFI1P/CDC31P COMPLEX                                                 |
| 2GV5        | D F                 | F        | CRYSTAL STRUCTURE OF SFI1P/CDC31P COMPLEX                                                 |
| 2GV5        | E F                 | E        | CRYSTAL STRUCTURE OF SFI1P/CDC31P COMPLEX                                                 |
| 2GV5        | E F                 | F        | CRYSTAL STRUCTURE OF SFI1P/CDC31P COMPLEX                                                 |
| 2GWF        | A B                 | A        | STRUCTURE OF A USP8-NRDP1 COMPLEX                                                         |
| 2GWF        | A B                 | B        | STRUCTURE OF A USP8-NRDP1 COMPLEX                                                         |
| 2GWW        | A B                 | A        | HUMAN VINCULIN (HEAD DOMAIN, VH1, RESIDUES 1-258) IN COMPLEX WITH SHIGELLA'S IPAA VINCULI |
| 2GWW        | A B                 | A        | HUMAN VINCULIN (HEAD DOMAIN, VH1, RESIDUES 1-258) IN COMPLEX WITH SHIGELLA'S IPAA VINCULI |
| 2GWW        | A B                 | B        | HUMAN VINCULIN (HEAD DOMAIN, VH1, RESIDUES 1-258) IN COMPLEX WITH SHIGELLA'S IPAA VINCULI |
| 2GYK        | E F                 | E        | CRYSTAL STRUCTURE OF THE COMPLEX OF THE COLICIN E9 DNASE DOMAIN WITH A MUTANT IMMUNI      |
| 2GZD        | A C                 | C        | CRYSTAL STRUCTURE OF RAB11 IN COMPLEX WITH RAB11-FIP2                                     |
| 2H0D        | A B                 | A        | STRUCTURE OF A BMI-1-RING1B POLYCOMB GROUP UBIQUITIN LIGASE COMPLEX                       |
| 2H0D        | A B                 | A        | STRUCTURE OF A BMI-1-RING1B POLYCOMB GROUP UBIQUITIN LIGASE COMPLEX                       |
| 2H0D        | A B                 | A        | STRUCTURE OF A BMI-1-RING1B POLYCOMB GROUP UBIQUITIN LIGASE COMPLEX                       |
| 2H0D        | A B                 | B        | STRUCTURE OF A BMI-1-RING1B POLYCOMB GROUP UBIQUITIN LIGASE COMPLEX                       |
| 2H1L        | B N                 | B        | THE STRUCTURE OF THE ONCOPROTEIN SV40 LARGE T ANTIGEN AND P53 TUMOR SUPPRESSOR COMPLI     |
| 2H1L        | C O                 | C        | THE STRUCTURE OF THE ONCOPROTEIN SV40 LARGE T ANTIGEN AND P53 TUMOR SUPPRESSOR COMPLI     |
| 2H1L        | F R                 | R        | THE STRUCTURE OF THE ONCOPROTEIN SV40 LARGE T ANTIGEN AND P53 TUMOR SUPPRESSOR COMPLI     |
| 2H1O        | A E                 | E        | STRUCTURE OF FITAB BOUND TO IR36 DNA FRAGMENT                                             |
| 2H1O        | B F                 | B        | STRUCTURE OF FITAB BOUND TO IR36 DNA FRAGMENT                                             |
| 2H1O        | C G                 | C        | STRUCTURE OF FITAB BOUND TO IR36 DNA FRAGMENT                                             |
| 2H4M        | A C                 | A        | KARYOPHERIN BETA2/TRANSPORTIN-M9NLS                                                       |
| 2H4M        | A C                 | A        | KARYOPHERIN BETA2/TRANSPORTIN-M9NLS                                                       |
| 2H62        | B C                 | B        | CRYSTAL STRUCTURE OF A TERNARY LIGAND-RECEPTOR COMPLEX OF BMP-2                           |
| 2H7V        | A C                 | A        | CO-CRYSTAL STRUCTURE OF YPKA-RAC1                                                         |
| 2H7V        | B D                 | B        | CO-CRYSTAL STRUCTURE OF YPKA-RAC1                                                         |
| 2HL5        | A C                 | A        | CRYSTAL STRUCTURE OF THE C-TERMINAL DOMAIN OF HUMAN EB1 IN COMPLEX WITH THE A49M MUT      |
| 2HL5        | B D                 | B        | CRYSTAL STRUCTURE OF THE C-TERMINAL DOMAIN OF HUMAN EB1 IN COMPLEX WITH THE A49M MUT      |
| 2HQW        | A B                 | A        | CRYSTAL STRUCTURE OF CA2+/CALMODULIN BOUND TO NMDA RECEPTOR NR1C1 PEPTIDE                 |
| 2HQW        | A B                 | A        | CRYSTAL STRUCTURE OF CA2+/CALMODULIN BOUND TO NMDA RECEPTOR NR1C1 PEPTIDE                 |
| 2HRK        | A B                 | A        | STRUCTURAL BASIS OF YEAST AMINOACYL-TRNA SYNTHETASE COMPLEX FORMATION REVEALED BY         |
| 2HWN        | A E                 | A        | CRYSTAL STRUCTURE OF RII ALPHA DIMERIZATION/DOCKING DOMAIN OF PKA BOUND TO THE D-AKAP     |
| 2HWN        | B E                 | E        | CRYSTAL STRUCTURE OF RII ALPHA DIMERIZATION/DOCKING DOMAIN OF PKA BOUND TO THE D-AKAP     |
| 2HWN        | D F                 | F        | CRYSTAL STRUCTURE OF RII ALPHA DIMERIZATION/DOCKING DOMAIN OF PKA BOUND TO THE D-AKAP     |
| 2I2R        | A E                 | E        | CRYSTAL STRUCTURE OF THE KCHIP1/KV4.3 T1 COMPLEX                                          |
| 2I2R        | B F                 | F        | CRYSTAL STRUCTURE OF THE KCHIP1/KV4.3 T1 COMPLEX                                          |
| 2I2R        | B F                 | F        | CRYSTAL STRUCTURE OF THE KCHIP1/KV4.3 T1 COMPLEX                                          |
| 2I2R        | C G                 | G        | CRYSTAL STRUCTURE OF THE KCHIP1/KV4.3 T1 COMPLEX                                          |
| 2I2R        | D H                 | H        | CRYSTAL STRUCTURE OF THE KCHIP1/KV4.3 T1 COMPLEX                                          |
| 2I2R        | J M                 | M        | CRYSTAL STRUCTURE OF THE KCHIP1/KV4.3 T1 COMPLEX                                          |
| 2I2R        | L O                 | O        | CRYSTAL STRUCTURE OF THE KCHIP1/KV4.3 T1 COMPLEX                                          |
| 2I2R        | L P                 | P        | CRYSTAL STRUCTURE OF THE KCHIP1/KV4.3 T1 COMPLEX                                          |
| 2I3S        | C D                 | D        | BUB3 COMPLEX WITH BUB1 GLEBS MOTIF                                                        |
| 2I3S        | E F                 | F        | BUB3 COMPLEX WITH BUB1 GLEBS MOTIF                                                        |
| 2I3T        | A B                 | B        | BUB3 COMPLEX WITH MAD3 (BUBR1) GLEBS MOTIF                                                |
| 2I3T        | E F                 | F        | BUB3 COMPLEX WITH MAD3 (BUBR1) GLEBS MOTIF                                                |
| 2IBF        | A B                 | A        | HUMAN VINCULIN'S HEAD DOMAIN (VH1, RESIDUES 1-258) IN COMPLEX WITH TWO VINCULIN BINDING   |
| 2IHB        | A B                 | B        | CRYSTAL STRUCTURE OF THE HETERODIMERIC COMPLEX OF HUMAN RGS10 AND ACTIVATED GI ALPHA      |
| 2IHS        | B D                 | D        | CRYSTAL STRUCTURE OF THE B30.2/SPRY DOMAIN OF GUSTAVUS IN COMPLEX WITH A 20-RESIDUE VAS/  |
| 2IK8        | A B                 | B        | CRYSTAL STRUCTURE OF THE HETERODIMERIC COMPLEX OF HUMAN RGS16 AND ACTIVATED GI ALPHA      |
| 2IK8        | C D                 | D        | CRYSTAL STRUCTURE OF THE HETERODIMERIC COMPLEX OF HUMAN RGS16 AND ACTIVATED GI ALPHA      |
| 2IK8        | C D                 | D        | CRYSTAL STRUCTURE OF THE HETERODIMERIC COMPLEX OF HUMAN RGS16 AND ACTIVATED GI ALPHA      |
| 2IO1        | A B                 | A        | CRYSTAL STRUCTURE OF HUMAN SENP2 IN COMPLEX WITH PRESUMO-3                                |

TABLE S4

Jochim, et al

| A. PDB<br>CODE | E. FUNCTION                       | F. $\Delta\Delta G_{\text{AVG,HELIX}}$<br>(KCAL/MOL) | G. $\Delta\Delta G_{\text{SUM,HELIX}}$<br>(KCAL/MOL) | H. # HOTSPOT<br>RESIDUES | I. HELIX<br>LENGTH |
|----------------|-----------------------------------|------------------------------------------------------|------------------------------------------------------|--------------------------|--------------------|
| 2GPP           | TRANSCRIPTION                     | 1.9                                                  | 5.7                                                  | 3                        | 11                 |
| 2GPP           | TRANSCRIPTION                     | 1.6                                                  | 6.4                                                  | 4                        | 8                  |
| 2GPV           | TRANSCRIPTION                     | 1.8                                                  | 5.4                                                  | 3                        | 11                 |
| 2GTP           | SIGNALING PROTEIN                 | 1.3                                                  | 2.6                                                  | 2                        | 21                 |
| 2GTP           | SIGNALING PROTEIN                 | 1.2                                                  | 2.4                                                  | 2                        | 10                 |
| 2GTP           | SIGNALING PROTEIN                 | 1.3                                                  | 2.6                                                  | 2                        | 21                 |
| 2GV5           | CELL CYCLE                        | 1.7                                                  | 3.3                                                  | 2                        | 13                 |
| 2GV5           | CELL CYCLE                        | 1.1                                                  | 3.3                                                  | 3                        | 14                 |
| 2GV5           | CELL CYCLE                        | 1.3                                                  | 5.2                                                  | 4                        | 50                 |
| 2GV5           | CELL CYCLE                        | 1.5                                                  | 5.8                                                  | 4                        | 16                 |
| 2GV5           | CELL CYCLE                        | 1.4                                                  | 2.8                                                  | 2                        | 8                  |
| 2GV5           | CELL CYCLE                        | 1.8                                                  | 19.6                                                 | 11                       | 50                 |
| 2GV5           | CELL CYCLE                        | 1.2                                                  | 2.4                                                  | 2                        | 14                 |
| 2GV5           | CELL CYCLE                        | 1.9                                                  | 5.6                                                  | 3                        | 50                 |
| 2GWF           | HYDROLASE/LIGASE                  | 1.4                                                  | 2.8                                                  | 2                        | 9                  |
| 2GWF           | HYDROLASE/LIGASE                  | 1.8                                                  | 3.5                                                  | 2                        | 7                  |
| 2GWW           | CELL ADHESION, STRUCTURAL PROTEIN | 1.6                                                  | 3.1                                                  | 2                        | 20                 |
| 2GWW           | CELL ADHESION, STRUCTURAL PROTEIN | 1.3                                                  | 4.0                                                  | 3                        | 25                 |
| 2GWW           | CELL ADHESION, STRUCTURAL PROTEIN | 1.8                                                  | 5.5                                                  | 3                        | 15                 |
| 2GYK           | ANTIBIOTIC/ANTIBIOTIC INHIBITOR   | 1.8                                                  | 5.4                                                  | 3                        | 16                 |
| 2GZD           | PROTEIN TRANSPORT                 | 1.3                                                  | 3.9                                                  | 3                        | 19                 |
| 2H0D           | METAL BINDING PROTEIN/LIGASE      | 1.5                                                  | 4.5                                                  | 3                        | 7                  |
| 2H0D           | METAL BINDING PROTEIN/LIGASE      | 1.4                                                  | 4.1                                                  | 3                        | 11                 |
| 2H0D           | METAL BINDING PROTEIN/LIGASE      | 1.9                                                  | 5.6                                                  | 3                        | 16                 |
| 2H0D           | METAL BINDING PROTEIN/LIGASE      | 1.8                                                  | 3.5                                                  | 2                        | 11                 |
| 2H1L           | VIRAL PROTEIN                     | 1.8                                                  | 3.5                                                  | 2                        | 14                 |
| 2H1L           | VIRAL PROTEIN                     | 1.8                                                  | 5.5                                                  | 3                        | 15                 |
| 2H1L           | VIRAL PROTEIN                     | 1.5                                                  | 3.0                                                  | 2                        | 5                  |
| 2H1O           | GENE REGULATION/DNA COMPLEX       | 1.9                                                  | 5.6                                                  | 3                        | 12                 |
| 2H1O           | GENE REGULATION/DNA COMPLEX       | 1.4                                                  | 2.7                                                  | 2                        | 18                 |
| 2H1O           | GENE REGULATION/DNA COMPLEX       | 1.6                                                  | 3.2                                                  | 2                        | 18                 |
| 2H4M           | PROTEIN TRANSPORT                 | 1.9                                                  | 5.6                                                  | 3                        | 19                 |
| 2H4M           | PROTEIN TRANSPORT                 | 1.7                                                  | 3.3                                                  | 2                        | 19                 |
| 2H62           | HORMONE/GROWTH FACTOR             | 1.1                                                  | 2.1                                                  | 2                        | 13                 |
| 2H7V           | SIGNALING PROTEIN                 | 1.7                                                  | 6.6                                                  | 4                        | 9                  |
| 2H7V           | SIGNALING PROTEIN                 | 1.4                                                  | 5.5                                                  | 4                        | 10                 |
| 2HL5           | STRUCTURAL PROTEIN                | 1.9                                                  | 7.7                                                  | 4                        | 37                 |
| 2HL5           | STRUCTURAL PROTEIN                | 1.9                                                  | 5.6                                                  | 3                        | 35                 |
| 2HQW           | METAL BINDING PROTEIN             | 1.7                                                  | 3.3                                                  | 2                        | 12                 |
| 2HQW           | METAL BINDING PROTEIN             | 1.2                                                  | 2.4                                                  | 2                        | 12                 |
| 2HRK           | LIGASE/RNA BINDING PROTEIN        | 1.6                                                  | 3.1                                                  | 2                        | 13                 |
| 2HWN           | TRANSFERASE                       | 1.3                                                  | 3.8                                                  | 3                        | 16                 |
| 2HWN           | TRANSFERASE                       | 1.4                                                  | 4.2                                                  | 3                        | 17                 |
| 2HWN           | TRANSFERASE                       | 1.4                                                  | 2.7                                                  | 2                        | 18                 |
| 2I2R           | TRANSPORT PROTEIN                 | 1.0                                                  | 3.1                                                  | 3                        | 15                 |
| 2I2R           | TRANSPORT PROTEIN                 | 1.4                                                  | 2.8                                                  | 2                        | 12                 |
| 2I2R           | TRANSPORT PROTEIN                 | 1.5                                                  | 2.9                                                  | 2                        | 8                  |
| 2I2R           | TRANSPORT PROTEIN                 | 1.2                                                  | 2.4                                                  | 2                        | 12                 |
| 2I2R           | TRANSPORT PROTEIN                 | 1.3                                                  | 2.6                                                  | 2                        | 12                 |
| 2I2R           | TRANSPORT PROTEIN                 | 1.5                                                  | 4.6                                                  | 3                        | 15                 |
| 2I2R           | TRANSPORT PROTEIN                 | 1.9                                                  | 7.7                                                  | 4                        | 15                 |
| 2I2R           | TRANSPORT PROTEIN                 | 1.3                                                  | 3.9                                                  | 3                        | 12                 |
| 2I3S           | CELL CYCLE                        | 1.5                                                  | 2.9                                                  | 2                        | 5                  |
| 2I3S           | CELL CYCLE                        | 1.3                                                  | 2.6                                                  | 2                        | 5                  |
| 2I3T           | CELL CYCLE                        | 1.8                                                  | 7.1                                                  | 4                        | 8                  |
| 2I3T           | CELL CYCLE                        | 1.3                                                  | 2.5                                                  | 2                        | 5                  |
| 2IBF           | CELL ADHESION, STRUCTURAL PROTEIN | 1.8                                                  | 5.4                                                  | 3                        | 47                 |
| 2IHB           | SIGNALING PROTEIN                 | 1.4                                                  | 5.6                                                  | 4                        | 21                 |
| 2IHS           | PEPTIDE BINDING PROTEIN           | 1.6                                                  | 3.2                                                  | 2                        | 6                  |
| 2IK8           | SIGNALING PROTEIN                 | 1.0                                                  | 3.0                                                  | 3                        | 13                 |
| 2IK8           | SIGNALING PROTEIN                 | 1.5                                                  | 2.9                                                  | 2                        | 21                 |
| 2IK8           | SIGNALING PROTEIN                 | 1.2                                                  | 2.3                                                  | 2                        | 13                 |
| 2IO1           | PROTEIN BINDING, HYDROLASE        | 1.6                                                  | 3.1                                                  | 2                        | 10                 |

TABLE S4

Jochim, et al

| A. PDB<br>CODE | J. HELIX START<br>RESIDUE # | K. HELIX END<br>RESIDUE # |
|----------------|-----------------------------|---------------------------|
| 2GPP           | 294                         | 304                       |
| 2GPP           | 379                         | 386                       |
| 2GPV           | 1320                        | 1330                      |
| 2GTP           | 159                         | 179                       |
| 2GTP           | 205                         | 214                       |
| 2GTP           | 159                         | 179                       |
| 2GV5           | 94                          | 106                       |
| 2GV5           | 19                          | 32                        |
| 2GV5           | 643                         | 692                       |
| 2GV5           | 695                         | 710                       |
| 2GV5           | 151                         | 158                       |
| 2GV5           | 643                         | 692                       |
| 2GV5           | 19                          | 32                        |
| 2GV5           | 643                         | 692                       |
| 2GWF           | 241                         | 249                       |
| 2GWF           | 262                         | 268                       |
| 2GWW           | 7                           | 26                        |
| 2GWW           | 41                          | 65                        |
| 2GWW           | 611                         | 625                       |
| 2GYK           | 30                          | 45                        |
| 2GZD           | 470                         | 488                       |
| 2H0D           | 9                           | 15                        |
| 2H0D           | 73                          | 83                        |
| 2H0D           | 86                          | 101                       |
| 2H0D           | 104                         | 114                       |
| 2H1L           | 609                         | 622                       |
| 2H1L           | 593                         | 607                       |
| 2H1L           | 177                         | 181                       |
| 2H1O           | 48                          | 59                        |
| 2H1O           | 54                          | 71                        |
| 2H1O           | 54                          | 71                        |
| 2H4M           | 722                         | 740                       |
| 2H4M           | 494                         | 512                       |
| 2H62           | 59                          | 71                        |
| 2H7V           | 62                          | 70                        |
| 2H7V           | 64                          | 73                        |
| 2HL5           | 195                         | 231                       |
| 2HL5           | 197                         | 231                       |
| 2HQW           | 118                         | 129                       |
| 2HQW           | 45                          | 56                        |
| 2HRK           | 162                         | 174                       |
| 2HWN           | 9                           | 24                        |
| 2HWN           | 4                           | 20                        |
| 2HWN           | 4                           | 21                        |
| 2I2R           | 50                          | 64                        |
| 2I2R           | 71                          | 82                        |
| 2I2R           | 174                         | 181                       |
| 2I2R           | 71                          | 82                        |
| 2I2R           | 71                          | 82                        |
| 2I2R           | 50                          | 64                        |
| 2I2R           | 50                          | 64                        |
| 2I2R           | 71                          | 82                        |
| 2I3S           | 323                         | 327                       |
| 2I3S           | 323                         | 327                       |
| 2I3T           | 381                         | 388                       |
| 2I3T           | 362                         | 366                       |
| 2IBF           | 102                         | 148                       |
| 2IHB           | 120                         | 140                       |
| 2IHS           | 195                         | 200                       |
| 2IK8           | 134                         | 146                       |
| 2IK8           | 153                         | 173                       |
| 2IK8           | 134                         | 146                       |
| 2IO1           | 440                         | 449                       |

| A. PDB<br>CODE | L. HELIX SEQUENCE                                   |
|----------------|-----------------------------------------------------|
| 2GPP           | LADQMSLLQSA                                         |
| 2GPP           | LLLHLKLS                                            |
| 2GPV           | LEAIIRKALMG                                         |
| 2GTP           | DEAQKVIYTLMEKDSYPRFLK                               |
| 2GTP           | RSERKKWIHC                                          |
| 2GTP           | DEAQKVIYTLMEKDSYPRFLK                               |
| 2GV5           | PLDEIKRAFQLFD                                       |
| 2GV5           | EEQKQEIYEAFSLF                                      |
| 2GV5           | KLNDILHVYEKSKERELQSQLFNAWRNRFCFYTEECNIQAISKRNRYQLEK |
| 2GV5           | LKKFRERLLEIVKSEE                                    |
| 2GV5           | ENEFIAIC                                            |
| 2GV5           | KLNDILHVYEKSKERELQSQLFNAWRNRFCFYTEECNIQAISKRNRYQLEK |
| 2GV5           | EEQKQEIYEAFSLF                                      |
| 2GV5           | KLNDILHVYEKSKERELQSQLFNAWRNRFCFYTEECNIQAISKRNRYQLEK |
| 2GWF           | DDSKDTWKK                                           |
| 2GWF           | LETRQMN                                             |
| 2GWW           | RTIESILEPVAQQISHLVIM                                |
| 2GWW           | TAPVAAVQAAVSNLVRVGKETVQTT                           |
| 2GWW           | NIYKAAKDVTTSLSK                                     |
| 2GYK           | EEELVKLVTHFEEMTE                                    |
| 2GZD           | KDTHIRELEDYIDNLLVRV                                 |
| 2H0D           | ITELNPH                                             |
| 2H0D           | KTLQDIVYKLV                                         |
| 2H0D           | LFKNEMKRRRDFYAAH                                    |
| 2H0D           | PNFDALISKIY                                         |
| 2H1L           | LSVYQKMKFNVAMG                                      |
| 2H1L           | QSRIVEWKERLDKEF                                     |
| 2H1L           | PHHER                                               |
| 2H1O           | LGSMLASIGQEI                                        |
| 2H1O           | KKKNVLHERMEQSILPLF                                  |
| 2H1O           | KKKNVLHERMEQSILPLF                                  |
| 2H4M           | ISVCNNATWAIGEISIQMG                                 |
| 2H4M           | KRVQEAACSAFATLEEEAC                                 |
| 2H62           | NHAIVQTLVNSVN                                       |
| 2H7V           | EDYDRLRPL                                           |
| 2H7V           | YDRLRPLSYP                                          |
| 2HL5           | ELMQQVNVLKLTVEDLEKERDFYFGKLRNIELICQEN               |
| 2HL5           | MQQVNVLKLTVEDLEKERDFYFGKLRNIELICQEN                 |
| 2HQW           | DEEVDEMIREAD                                        |
| 2HQW           | EAELQDMINEVD                                        |
| 2HRK           | VNVSRYTLEMD                                         |
| 2HWN           | LTELLQGYTVEVLRQQ                                    |
| 2HWN           | LAWKIAKMIVSDVMQQC                                   |
| 2HWN           | LAWKIAKMIVSDVMQQCK                                  |
| 2I2R           | KRELQVLYRGFKNEC                                     |
| 2I2R           | EDTFKQIYAQFF                                        |
| 2I2R           | HVDVFFQK                                            |
| 2I2R           | EDTFKQIYAQFF                                        |
| 2I2R           | EDTFKQIYAQFF                                        |
| 2I2R           | KRELQVLYRGFKNEC                                     |
| 2I2R           | KRELQVLYRGFKNEC                                     |
| 2I2R           | EDTFKQIYAQFF                                        |
| 2I3S           | FNLIY                                               |
| 2I3S           | FNLIY                                               |
| 2I3T           | LEEVLAIS                                            |
| 2I3T           | FKLIY                                               |
| 2IBF           | VPARDYLIDSGRILSGTSDLLTFDEAEVRKIIRVCKGILEYLTVA       |
| 2IHB           | QKLQDQIFNLMKYDSYSRFLK                               |
| 2IHS           | VERKRE                                              |
| 2IK8           | HETRELTRMNLQT                                       |
| 2IK8           | DAAQGKTRTLMEKDSYPRFLK                               |
| 2IK8           | HETRELTRMNLQT                                       |
| 2IO1           | TFFYPKLLKSG                                         |

| A. PDB<br>CODE | M. RESOLUTION |
|----------------|---------------|
| 2GPP           | 2.6           |
| 2GPP           | 2.6           |
| 2GPV           | 2.85          |
| 2GTP           | 2.55          |
| 2GTP           | 2.55          |
| 2GTP           | 2.55          |
| 2GV5           | 3             |
| 2GV5           | 3             |
| 2GV5           | 3             |
| 2GV5           | 3             |
| 2GV5           | 3             |
| 2GV5           | 3             |
| 2GV5           | 3             |
| 2GV5           | 3             |
| 2GWF           | 2.3           |
| 2GWF           | 2.3           |
| 2GWW           | 2.72          |
| 2GWW           | 2.72          |
| 2GWW           | 2.72          |
| 2GYK           | 1.6           |
| 2GZD           | 2.44          |
| 2H0D           | 2.5           |
| 2H0D           | 2.5           |
| 2H0D           | 2.5           |
| 2H0D           | 2.5           |
| 2H1L           | 3.16          |
| 2H1L           | 3.16          |
| 2H1L           | 3.16          |
| 2H1O           | 3             |
| 2H1O           | 3             |
| 2H1O           | 3             |
| 2H4M           | 3.05          |
| 2H4M           | 3.05          |
| 2H62           | 1.85          |
| 2H7V           | 2.6           |
| 2H7V           | 2.6           |
| 2HL5           | 1.93          |
| 2HL5           | 1.93          |
| 2HQW           | 1.9           |
| 2HQW           | 1.9           |
| 2HRK           | 2.05          |
| 2HWN           | 1.6           |
| 2HWN           | 1.6           |
| 2HWN           | 1.6           |
| 2I2R           | 3.35          |
| 2I2R           | 3.35          |
| 2I2R           | 3.35          |
| 2I2R           | 3.35          |
| 2I2R           | 3.35          |
| 2I2R           | 3.35          |
| 2I2R           | 3.35          |
| 2I2R           | 3.35          |
| 2I3S           | 1.9           |
| 2I3S           | 1.9           |
| 2I3T           | 2.8           |
| 2I3T           | 2.8           |
| 2IBF           | 3.2           |
| 2IHB           | 2.71          |
| 2IHS           | 2.2           |
| 2IK8           | 2.71          |
| 2IK8           | 2.71          |
| 2IK8           | 2.71          |
| 2IO1           | 2.6           |

| A. PDB CODE | B. INTERFACE CHAINS | C. CHAIN | D. TITLE                                                                                 |
|-------------|---------------------|----------|------------------------------------------------------------------------------------------|
| 2IO5        | A B                 | B        | CRYSTAL STRUCTURE OF THE CIA- HISTONE H3-H4 COMPLEX                                      |
| 2IO5        | B C                 | B        | CRYSTAL STRUCTURE OF THE CIA- HISTONE H3-H4 COMPLEX                                      |
| 2IO5        | B C                 | C        | CRYSTAL STRUCTURE OF THE CIA- HISTONE H3-H4 COMPLEX                                      |
| 2IO5        | B C                 | C        | CRYSTAL STRUCTURE OF THE CIA- HISTONE H3-H4 COMPLEX                                      |
| 2IZV        | A C                 | A        | CRYSTAL STRUCTURE OF SOCS-4 IN COMPLEX WITH ELONGIN-B AND ELONGIN-C AT 2.55A RESOLUTION  |
| 2IZV        | A C                 | C        | CRYSTAL STRUCTURE OF SOCS-4 IN COMPLEX WITH ELONGIN-B AND ELONGIN-C AT 2.55A RESOLUTION  |
| 2IZX        | A C                 | C        | MOLECULAR BASIS OF AKAP SPECIFICITY FOR PKA REGULATORY SUBUNITS                          |
| 2IZX        | B C                 | B        | MOLECULAR BASIS OF AKAP SPECIFICITY FOR PKA REGULATORY SUBUNITS                          |
| 2IZX        | B C                 | C        | MOLECULAR BASIS OF AKAP SPECIFICITY FOR PKA REGULATORY SUBUNITS                          |
| 2J0Q        | A C                 | A        | THE CRYSTAL STRUCTURE OF THE EXON JUNCTION COMPLEX AT 3.2 A RESOLUTION                   |
| 2J0Q        | A T                 | A        | THE CRYSTAL STRUCTURE OF THE EXON JUNCTION COMPLEX AT 3.2 A RESOLUTION                   |
| 2J0Q        | B D                 | D        | THE CRYSTAL STRUCTURE OF THE EXON JUNCTION COMPLEX AT 3.2 A RESOLUTION                   |
| 2J0Q        | B I                 | B        | THE CRYSTAL STRUCTURE OF THE EXON JUNCTION COMPLEX AT 3.2 A RESOLUTION                   |
| 2J0Q        | B I                 | B        | THE CRYSTAL STRUCTURE OF THE EXON JUNCTION COMPLEX AT 3.2 A RESOLUTION                   |
| 2J0Q        | C D                 | C        | THE CRYSTAL STRUCTURE OF THE EXON JUNCTION COMPLEX AT 3.2 A RESOLUTION                   |
| 2J0T        | C F                 | C        | CRYSTAL STRUCTURE OF THE CATALYTIC DOMAIN OF MMP-1 IN COMPLEX WITH THE INHIBITORY DOM    |
| 2J3R        | A B                 | A        | THE CRYSTAL STRUCTURE OF THE BET3-TRS31 HETERODIMER.                                     |
| 2J3R        | A B                 | A        | THE CRYSTAL STRUCTURE OF THE BET3-TRS31 HETERODIMER.                                     |
| 2J3R        | A B                 | B        | THE CRYSTAL STRUCTURE OF THE BET3-TRS31 HETERODIMER.                                     |
| 2J3W        | C F                 | F        | THE CRYSTAL STRUCTURE OF THE BET3-TRS31-SEDLIN COMPLEX.                                  |
| 2J59        | B N                 | N        | CRYSTAL STRUCTURE OF THE ARF1:ARHGAP21-ARFBD COMPLEX                                     |
| 2J59        | C O                 | O        | CRYSTAL STRUCTURE OF THE ARF1:ARHGAP21-ARFBD COMPLEX                                     |
| 2J59        | D P                 | P        | CRYSTAL STRUCTURE OF THE ARF1:ARHGAP21-ARFBD COMPLEX                                     |
| 2J59        | E Q                 | Q        | CRYSTAL STRUCTURE OF THE ARF1:ARHGAP21-ARFBD COMPLEX                                     |
| 2J59        | F R                 | R        | CRYSTAL STRUCTURE OF THE ARF1:ARHGAP21-ARFBD COMPLEX                                     |
| 2J9U        | A B                 | A        | 2 ANGSTROM X-RAY STRUCTURE OF THE YEAST ESCRT-I VPS28 C- TERMINUS IN COMPLEX WITH THE NZ |
| 2JBY        | A B                 | A        | A VIRAL PROTEIN UNEXPECTEDLY MIMICS THE STRUCTURE AND FUNCTION OF PRO-SURVIVAL BCL-2     |
| 2JBY        | A B                 | A        | A VIRAL PROTEIN UNEXPECTEDLY MIMICS THE STRUCTURE AND FUNCTION OF PRO-SURVIVAL BCL-2     |
| 2JBY        | A B                 | B        | A VIRAL PROTEIN UNEXPECTEDLY MIMICS THE STRUCTURE AND FUNCTION OF PRO-SURVIVAL BCL-2     |
| 2JDQ        | B D                 | B        | C-TERMINAL DOMAIN OF INFLUENZA A VIRUS POLYMERASE PB2 SUBUNIT IN COMPLEX WITH HUMAN I    |
| 2JF9        | A P                 | A        | ESTROGEN RECEPTOR ALPHA LBD IN COMPLEX WITH A TAMOXIFEN- SPECIFIC PEPTIDE ANTAGONIST     |
| 2JF9        | A P                 | P        | ESTROGEN RECEPTOR ALPHA LBD IN COMPLEX WITH A TAMOXIFEN- SPECIFIC PEPTIDE ANTAGONIST     |
| 2JF9        | B Q                 | B        | ESTROGEN RECEPTOR ALPHA LBD IN COMPLEX WITH A TAMOXIFEN- SPECIFIC PEPTIDE ANTAGONIST     |
| 2JFA        | A B                 | A        | ESTROGEN RECEPTOR ALPHA LBD IN COMPLEX WITH AN AFFINITY- SELECTED COREPRESSOR PEPTIDE    |
| 2JFA        | A B                 | B        | ESTROGEN RECEPTOR ALPHA LBD IN COMPLEX WITH AN AFFINITY- SELECTED COREPRESSOR PEPTIDE    |
| 2JFA        | A P                 | A        | ESTROGEN RECEPTOR ALPHA LBD IN COMPLEX WITH AN AFFINITY- SELECTED COREPRESSOR PEPTIDE    |
| 2JFA        | B Q                 | Q        | ESTROGEN RECEPTOR ALPHA LBD IN COMPLEX WITH AN AFFINITY- SELECTED COREPRESSOR PEPTIDE    |
| 2JGZ        | A B                 | B        | CRYSTAL STRUCTURE OF PHOSPHO-CDK2 IN COMPLEX WITH CYCLIN B                               |
| 2JKI        | A S                 | A        | COMPLEX OF HSP90 N-TERMINAL AND SGT1 CS DOMAIN                                           |
| 2JKI        | B S                 | B        | COMPLEX OF HSP90 N-TERMINAL AND SGT1 CS DOMAIN                                           |
| 2JKI        | C T                 | C        | COMPLEX OF HSP90 N-TERMINAL AND SGT1 CS DOMAIN                                           |
| 2JM6        | A B                 | A        | SOLUTION STRUCTURE OF MCL-1 COMPLEXED WITH NOXAB                                         |
| 2JQ9        | A B                 | A        | VPS4A MIT-CHMP1A COMPLEX                                                                 |
| 2JQ9        | A B                 | B        | VPS4A MIT-CHMP1A COMPLEX                                                                 |
| 2JQK        | A B                 | B        | VPS4B MIT-CHMP2B COMPLEX                                                                 |
| 2JTT        | A C                 | A        | SOLUTION STRUCTURE OF CALCIUM LOADED S100A6 BOUND TO C- TERMINAL SIAH-1 INTERACTING PR   |
| 2JTT        | A D                 | D        | SOLUTION STRUCTURE OF CALCIUM LOADED S100A6 BOUND TO C- TERMINAL SIAH-1 INTERACTING PR   |
| 2JTT        | A D                 | D        | SOLUTION STRUCTURE OF CALCIUM LOADED S100A6 BOUND TO C- TERMINAL SIAH-1 INTERACTING PR   |
| 2JTT        | B C                 | B        | SOLUTION STRUCTURE OF CALCIUM LOADED S100A6 BOUND TO C- TERMINAL SIAH-1 INTERACTING PR   |
| 2JTT        | B D                 | D        | SOLUTION STRUCTURE OF CALCIUM LOADED S100A6 BOUND TO C- TERMINAL SIAH-1 INTERACTING PR   |
| 2JXC        | A B                 | A        | STRUCTURE OF THE EPS15-EH2 STONIN2 COMPLEX                                               |
| 2JZB        | A B                 | A        | SOLUTION STRUCTURE OF THE COMPLEX BETWEEN E.COLI NUSA-AR2 AND RNAP-ACTD                  |
| 2K21        | A B                 | A        | NMR SOLUTION STRUCTURE OF THE C-TERMINAL DOMAIN (T94-Y172) OF THE HUMAN CENTRIN 2 IN CC  |
| 2K21        | A B                 | A        | NMR SOLUTION STRUCTURE OF THE C-TERMINAL DOMAIN (T94-Y172) OF THE HUMAN CENTRIN 2 IN CC  |
| 2K21        | A B                 | A        | NMR SOLUTION STRUCTURE OF THE C-TERMINAL DOMAIN (T94-Y172) OF THE HUMAN CENTRIN 2 IN CC  |
| 2K21        | A B                 | A        | NMR SOLUTION STRUCTURE OF THE C-TERMINAL DOMAIN (T94-Y172) OF THE HUMAN CENTRIN 2 IN CC  |
| 2K3S        | A B                 | A        | HADDOCK-DERIVED STRUCTURE OF THE CH-DOMAIN OF THE SMOOTHELIN-LIKE 1 COMPLEXED WITH       |
| 2K7W        | A B                 | B        | BAX ACTIVATION IS INITIATED AT A NOVEL INTERACTION SITE                                  |
| 2K8F        | A B                 | A        | STRUCTURAL BASIS FOR THE REGULATION OF P53 FUNCTION BY P300                              |
| 2K9J        | A B                 | B        | INTEGRIN ALPHAIIIB-BETA3 TRANSMEMBRANE COMPLEX                                           |
| 2KA6        | A B                 | A        | NMR STRUCTURE OF THE CBP-TAZ2/STAT1-TAD COMPLEX                                          |
| 2KA6        | A B                 | A        | NMR STRUCTURE OF THE CBP-TAZ2/STAT1-TAD COMPLEX                                          |
| 2KBR        | A B                 | A        | SOLUTION STRUCTURE OF HARMONIN N TERMINAL DOMAIN IN COMPLEX WITH A INTERNAL PEPTIDE (    |



TABLE S4

Jochim, et al

| A. PDB<br>CODE | E. FUNCTION                              | F. $\Delta\Delta G_{\text{AVG,HELIX}}$<br>(KCAL/MOL) | G. $\Delta\Delta G_{\text{SUM,HELIX}}$<br>(KCAL/MOL) | H. # HOTSPOT<br>RESIDUES | I. HELIX<br>LENGTH |
|----------------|------------------------------------------|------------------------------------------------------|------------------------------------------------------|--------------------------|--------------------|
| 2IO5           | CHAPERONE/STRUCTURAL PROTEIN             | 1.5                                                  | 3.0                                                  | 2                        | 12                 |
| 2IO5           | CHAPERONE/STRUCTURAL PROTEIN             | 1.4                                                  | 7.0                                                  | 5                        | 16                 |
| 2IO5           | CHAPERONE/STRUCTURAL PROTEIN             | 1.8                                                  | 11.0                                                 | 6                        | 27                 |
| 2IO5           | CHAPERONE/STRUCTURAL PROTEIN             | 1.1                                                  | 2.1                                                  | 2                        | 11                 |
| 2IZV           | TRANSCRIPTION                            | 1.9                                                  | 7.6                                                  | 4                        | 13                 |
| 2IZV           | TRANSCRIPTION                            | 1.6                                                  | 3.2                                                  | 2                        | 11                 |
| 2IZX           | KINASE                                   | 1.7                                                  | 5.2                                                  | 3                        | 17                 |
| 2IZX           | KINASE                                   | 1.1                                                  | 2.1                                                  | 2                        | 16                 |
| 2IZX           | KINASE                                   | 1.2                                                  | 2.4                                                  | 2                        | 17                 |
| 2J0Q           | HYDROLASE                                | 1.3                                                  | 2.6                                                  | 2                        | 12                 |
| 2J0Q           | HYDROLASE                                | 1.7                                                  | 5.2                                                  | 3                        | 14                 |
| 2J0Q           | HYDROLASE                                | 1.7                                                  | 3.3                                                  | 2                        | 12                 |
| 2J0Q           | HYDROLASE                                | 1.6                                                  | 4.8                                                  | 3                        | 14                 |
| 2J0Q           | HYDROLASE                                | 1.5                                                  | 2.9                                                  | 2                        | 14                 |
| 2J0Q           | HYDROLASE                                | 1.8                                                  | 3.6                                                  | 2                        | 25                 |
| 2J0T           | HYDROLASE                                | 1.2                                                  | 2.4                                                  | 2                        | 13                 |
| 2J3R           | TRANSPORT                                | 1.3                                                  | 2.6                                                  | 2                        | 26                 |
| 2J3R           | TRANSPORT                                | 1.5                                                  | 7.7                                                  | 5                        | 19                 |
| 2J3R           | TRANSPORT                                | 1.5                                                  | 9.0                                                  | 6                        | 18                 |
| 2J3W           | TRANSPORT                                | 1.3                                                  | 2.5                                                  | 2                        | 11                 |
| 2J59           | HYDROLASE                                | 1.8                                                  | 3.6                                                  | 2                        | 22                 |
| 2J59           | HYDROLASE                                | 1.8                                                  | 5.3                                                  | 3                        | 20                 |
| 2J59           | HYDROLASE                                | 1.6                                                  | 4.9                                                  | 3                        | 21                 |
| 2J59           | HYDROLASE                                | 1.5                                                  | 5.8                                                  | 4                        | 22                 |
| 2J59           | HYDROLASE                                | 1.2                                                  | 3.7                                                  | 3                        | 22                 |
| 2J9U           | PROTEIN TRANSPORT                        | 1.7                                                  | 5.0                                                  | 3                        | 19                 |
| 2JBY           | APOPTOSIS                                | 1.7                                                  | 3.3                                                  | 2                        | 11                 |
| 2JBY           | APOPTOSIS                                | 1.6                                                  | 3.2                                                  | 2                        | 22                 |
| 2JBY           | APOPTOSIS                                | 1.8                                                  | 5.5                                                  | 3                        | 13                 |
| 2JDQ           | PROTEIN TRANSPORT                        | 1.8                                                  | 3.5                                                  | 2                        | 16                 |
| 2JF9           | TRANSCRIPTION                            | 1.6                                                  | 6.4                                                  | 4                        | 24                 |
| 2JF9           | TRANSCRIPTION                            | 1.7                                                  | 5.1                                                  | 3                        | 8                  |
| 2JF9           | TRANSCRIPTION                            | 1.8                                                  | 3.5                                                  | 2                        | 22                 |
| 2JFA           | TRANSCRIPTION                            | 1.4                                                  | 6.9                                                  | 5                        | 33                 |
| 2JFA           | TRANSCRIPTION                            | 1.3                                                  | 9.2                                                  | 7                        | 32                 |
| 2JFA           | TRANSCRIPTION                            | 1.2                                                  | 2.4                                                  | 2                        | 24                 |
| 2JFA           | TRANSCRIPTION                            | 1.9                                                  | 5.8                                                  | 3                        | 14                 |
| 2JGZ           | TRANSFERASE                              | 1.7                                                  | 3.4                                                  | 2                        | 15                 |
| 2JKI           | CHAPERONE                                | 1.6                                                  | 6.4                                                  | 4                        | 8                  |
| 2JKI           | CHAPERONE                                | 1.2                                                  | 2.4                                                  | 2                        | 12                 |
| 2JKI           | CHAPERONE                                | 1.4                                                  | 2.8                                                  | 2                        | 12                 |
| 2JM6           | APOPTOSIS                                | 1.2                                                  | 4.9                                                  | 4                        | 24                 |
| 2JQ9           | PROTEIN TRANSPORT                        | 1.5                                                  | 3.0                                                  | 2                        | 26                 |
| 2JQ9           | PROTEIN TRANSPORT                        | 1.2                                                  | 2.3                                                  | 2                        | 12                 |
| 2JQK           | PROTEIN TRANSPORT                        | 1.3                                                  | 2.6                                                  | 2                        | 11                 |
| 2JTT           | CALCIUM BINDING PROTEIN/ANTITUMOR PROTEI | 1.8                                                  | 3.6                                                  | 2                        | 22                 |
| 2JTT           | CALCIUM BINDING PROTEIN/ANTITUMOR PROTEI | 1.3                                                  | 2.5                                                  | 2                        | 13                 |
| 2JTT           | CALCIUM BINDING PROTEIN/ANTITUMOR PROTEI | 1.8                                                  | 7.3                                                  | 4                        | 10                 |
| 2JTT           | CALCIUM BINDING PROTEIN/ANTITUMOR PROTEI | 1.8                                                  | 3.5                                                  | 2                        | 15                 |
| 2JTT           | CALCIUM BINDING PROTEIN/ANTITUMOR PROTEI | 1.4                                                  | 2.7                                                  | 2                        | 13                 |
| 2JXC           | ENDOCYTOSIS/PROTEIN BINDING              | 1.3                                                  | 2.5                                                  | 2                        | 12                 |
| 2JZB           | TRANSFERASE/TRANSCRIPTION                | 1.7                                                  | 3.3                                                  | 2                        | 14                 |
| 2K2I           | CELL CYCLE                               | 1.5                                                  | 2.9                                                  | 2                        | 10                 |
| 2K2I           | CELL CYCLE                               | 1.7                                                  | 3.4                                                  | 2                        | 9                  |
| 2K2I           | CELL CYCLE                               | 1.5                                                  | 4.4                                                  | 3                        | 12                 |
| 2K2I           | CELL CYCLE                               | 1.9                                                  | 3.7                                                  | 2                        | 13                 |
| 2K3S           | PROTEIN BINDING                          | 1.3                                                  | 2.6                                                  | 2                        | 18                 |
| 2K7W           | APOPTOSIS                                | 1.5                                                  | 2.9                                                  | 2                        | 16                 |
| 2K8F           | TRANSFERASE/TRANSCRIPTION                | 1.7                                                  | 3.3                                                  | 2                        | 16                 |
| 2K9J           | MEMBRANE PROTEIN                         | 1.3                                                  | 5.0                                                  | 4                        | 33                 |
| 2KA6           | TRANSCRIPTION REGULATOR                  | 1.9                                                  | 5.7                                                  | 3                        | 13                 |
| 2KA6           | TRANSCRIPTION REGULATOR                  | 1.7                                                  | 5.1                                                  | 3                        | 17                 |
| 2KBR           | STRUCTURAL PROTEIN/CELL ADHESION         | 1.7                                                  | 3.3                                                  | 2                        | 16                 |

TABLE S4

Jochim, et al

| A. PDB<br>CODE | J. HELIX START<br>RESIDUE # | K. HELIX END<br>RESIDUE # |
|----------------|-----------------------------|---------------------------|
| 2IO5           | 121                         | 132                       |
| 2IO5           | 64                          | 79                        |
| 2IO5           | 50                          | 76                        |
| 2IO5           | 31                          | 41                        |
| 2IZV           | 389                         | 401                       |
| 2IZV           | 100                         | 110                       |
| 2IZX           | 5                           | 21                        |
| 2IZX           | 9                           | 24                        |
| 2IZX           | 5                           | 21                        |
| 2J0Q           | 385                         | 396                       |
| 2J0Q           | 195                         | 208                       |
| 2J0Q           | 124                         | 135                       |
| 2J0Q           | 195                         | 208                       |
| 2J0Q           | 287                         | 300                       |
| 2J0Q           | 116                         | 140                       |
| 2J0T           | 212                         | 224                       |
| 2J3R           | 37                          | 62                        |
| 2J3R           | 16                          | 34                        |
| 2J3R           | 26                          | 43                        |
| 2J3W           | 176                         | 186                       |
| 2J59           | 1042                        | 1063                      |
| 2J59           | 1042                        | 1061                      |
| 2J59           | 1042                        | 1062                      |
| 2J59           | 1042                        | 1063                      |
| 2J59           | 1042                        | 1063                      |
| 2J9U           | 174                         | 192                       |
| 2JBY           | 42                          | 52                        |
| 2JBY           | 77                          | 98                        |
| 2JBY           | 70                          | 82                        |
| 2JDQ           | 352                         | 367                       |
| 2JF9           | 372                         | 395                       |
| 2JF9           | 5                           | 12                        |
| 2JF9           | 342                         | 363                       |
| 2JFA           | 497                         | 529                       |
| 2JFA           | 497                         | 528                       |
| 2JFA           | 372                         | 395                       |
| 2JFA           | 2                           | 15                        |
| 2JGZ           | 279                         | 293                       |
| 2JKI           | 88                          | 95                        |
| 2JKI           | 189                         | 200                       |
| 2JKI           | 189                         | 200                       |
| 2JM6           | 71                          | 94                        |
| 2JQ9           | 50                          | 75                        |
| 2JQ9           | 116                         | 127                       |
| 2JQK           | 117                         | 127                       |
| 2JTT           | 3                           | 24                        |
| 2JTT           | 206                         | 218                       |
| 2JTT           | 192                         | 201                       |
| 2JTT           | 70                          | 84                        |
| 2JTT           | 206                         | 218                       |
| 2JXC           | 162                         | 173                       |
| 2JZB           | 297                         | 310                       |
| 2K2I           | 140                         | 149                       |
| 2K2I           | 159                         | 167                       |
| 2K2I           | 123                         | 134                       |
| 2K2I           | 102                         | 114                       |
| 2K3S           | 94                          | 111                       |
| 2K7W           | 146                         | 161                       |
| 2K8F           | 34                          | 49                        |
| 2K9J           | 693                         | 725                       |
| 2KA6           | 79                          | 91                        |
| 2KA6           | 55                          | 71                        |
| 2KBR           | 3                           | 18                        |

| A. PDB<br>CODE | L. HELIX SEQUENCE                |
|----------------|----------------------------------|
| 2IO5           | PKDIQLARRIRG                     |
| 2IO5           | KLPFQRLVREIAQDFK                 |
| 2IO5           | IYEETRGLVKVFLENVIRDAVITYTEHA     |
| 2IO5           | KPAIRRLARRG                      |
| 2IZV           | LQHICRTVICNCT                    |
| 2IZV           | ALELLMAANFL                      |
| 2IZX           | IEYLAKQIVDNAIQQAK                |
| 2IZX           | LTELLQGYTVEVLRQQ                 |
| 2IZX           | IEYLAKQIVDNAIQQAK                |
| 2J0Q           | DIRILRDIEQYY                     |
| 2J0Q           | KGFKEQIYDVYRYL                   |
| 2J0Q           | YKEAQAAMEGLN                     |
| 2J0Q           | KGFKEQIYDVYRYL                   |
| 2J0Q           | KRKVDWLTEKMREA                   |
| 2J0Q           | PEGLRVFYLVQDLKCLVFLSLIGLH        |
| 2J0T           | LHRVAAHELGHSL                    |
| 2J3R           | DEDVNKQLDRMGYNIGVRLIEDFLAR       |
| 2J3R           | SELFTLTYGALVTQLCKDY              |
| 2J3R           | VSAFALLFSEMVQYCQSR               |
| 2J3W           | ESVIARDKALD                      |
| 2J59           | EEDTGVTNRDLISRRIKEYNNL           |
| 2J59           | EEDTGVTNRDLISRRIKEYN             |
| 2J59           | EEDTGVTNRDLISRRIKEYNN            |
| 2J59           | EEDTGVTNRDLISRRIKEYNNL           |
| 2J59           | EEDTGVTNRDLISRRIKEYNNL           |
| 2J9U           | KDQLHPLLAELLISINRVT              |
| 2JBY           | AKNYDTLYDIM                      |
| 2JBY           | PSVKLATLTLASVIKLNKIQ             |
| 2JBY           | TMGQVGRQLAIIG                    |
| 2JDQ           | ESIKKEACWTISNITA                 |
| 2JF9           | LHDQVHLLLECAWLEILMIGLVWRS        |
| 2JF9           | REWFKDML                         |
| 2JF9           | MMGLLTNLADRELVHMINWAKR           |
| 2JFA           | LQQQHQLAQLLLILSHIRHMSNKGMEHLYSMK |
| 2JFA           | LQQQHQLAQLLLILSHIRHMSNKGMEHLYSM  |
| 2JFA           | LHDQVHLLLECAWLEILMIGLVWRS        |
| 2JFA           | AFQLRQLLIRGLQD                   |
| 2JGZ           | KHQIRQMEMKILRAL                  |
| 2JKI           | KSDLVNNL                         |
| 2JKI           | ERRIKDLVKRHS                     |
| 2JKI           | ERRIKDLVKRHS                     |
| 2JM6           | LKDECAQLRRIGDKVNLRQKLLNM         |
| 2JQ9           | DKAKESIRAKCVQYLDRAEKLDYLR        |
| 2JQ9           | DQLSRRLAALRN                     |
| 2JQK           | EEIERQLKALG                      |
| 2JTT           | SPLDQAIGLLIGIFHKYSGKEG           |
| 2JTT           | DMKRTINKAWVES                    |
| 2JTT           | LMNVLKKIYE                       |
| 2JTT           | FQEYITFLGALAMIY                  |
| 2JTT           | DMKRTINKAWVES                    |
| 2JXC           | VDILGRVWELSD                     |
| 2JZB           | KKSLTEIKDVLASR                   |
| 2K2I           | EELQEMIDEA                       |
| 2K2I           | EQEFLRIMK                        |
| 2K2I           | FKNLKRVAKELG                     |
| 2K2I           | TKEEILKAFKLF                     |
| 2K3S           | SKCVYTYIQELYRSLVQK               |
| 2K7W           | IWIAQELRRIGDEFNA                 |
| 2K8F           | PSCQKMKRVVQHTKGC                 |
| 2K9J           | ILVLLSVMGAILLIGLAALLIWKLLITHDRK  |
| 2KA6           | PFCLNIKHKLRRQ                    |
| 2KA6           | PVCKQLIALCCYHAKHC                |
| 2KBR           | RKVAREFRHKVDFLIE                 |

| A. PDB<br>CODE | M. RESOLUTION |
|----------------|---------------|
| 2IO5           | 2.7           |
| 2IO5           | 2.7           |
| 2IO5           | 2.7           |
| 2IO5           | 2.7           |
| 2IZV           | 2.55          |
| 2IZV           | 2.55          |
| 2IZX           | 1.3           |
| 2IZX           | 1.3           |
| 2IZX           | 1.3           |
| 2J0Q           | 3.2           |
| 2J0Q           | 3.2           |
| 2J0Q           | 3.2           |
| 2J0Q           | 3.2           |
| 2J0Q           | 3.2           |
| 2J0Q           | 3.2           |
| 2J0T           | 2.54          |
| 2J3R           | 2.6           |
| 2J3R           | 2.6           |
| 2J3R           | 2.6           |
| 2J3W           | 2.1           |
| 2J59           | 2.1           |
| 2J59           | 2.1           |
| 2J59           | 2.1           |
| 2J59           | 2.1           |
| 2J59           | 2.1           |
| 2J9U           | 2             |
| 2JBY           | 2.41          |
| 2JBY           | 2.41          |
| 2JBY           | 2.41          |
| 2JDQ           | 2.2           |
| 2JF9           | 2.1           |
| 2JF9           | 2.1           |
| 2JF9           | 2.1           |
| 2JFA           | 2.55          |
| 2JFA           | 2.55          |
| 2JFA           | 2.55          |
| 2JFA           | 2.55          |
| 2JGZ           | 2.9           |
| 2JKI           | 3.3           |
| 2JKI           | 3.3           |
| 2JKI           | 3.3           |
| 2JM6           | NOT APP       |
| 2JQ9           | NOT APP       |
| 2JQ9           | NOT APP       |
| 2JQK           | NOT APP       |
| 2JTT           | NOT APP       |
| 2JTT           | NOT APP       |
| 2JTT           | NOT APP       |
| 2JTT           | NOT APP       |
| 2JTT           | NOT APP       |
| 2JTT           | NOT APP       |
| 2JXC           | NOT APP       |
| 2JZB           | NOT APP       |
| 2K2I           | NOT APP       |
| 2K2I           | NOT APP       |
| 2K2I           | NOT APP       |
| 2K2I           | NOT APP       |
| 2K3S           | NOT APP       |
| 2K7W           | NOT APP       |
| 2K8F           | NOT APP       |
| 2K9J           | NOT APP       |
| 2KA6           | NOT APP       |
| 2KA6           | NOT APP       |
| 2KBR           | NOT APP       |

| A. PDB CODE | B. INTERFACE CHAINS | C. CHAIN | D. TITLE                                                                                  |
|-------------|---------------------|----------|-------------------------------------------------------------------------------------------|
| 2KBR        | A B                 | B        | SOLUTION STRUCTURE OF HARMONIN N TERMINAL DOMAIN IN COMPLEX WITH A INTERNAL PEPTIDE (     |
| 2KC8        | A B                 | B        | STRUCTURE OF E. COLI TOXIN RELE (R81A/R83A) MUTANT IN COMPLEX WITH ANTITOXIN RELBC (K47-I |
| 2NLA        | A B                 | A        | CRYSTAL STRUCTURE OF THE MCL-1:MNOXAB BH3 COMPLEX                                         |
| 2NNU        | A B                 | A        | CRYSTAL STRUCTURE OF THE PAPILLOMAVIRUS DNA TETHERING COMPLEX E2:BRD4                     |
| 2NNU        | A B                 | A        | CRYSTAL STRUCTURE OF THE PAPILLOMAVIRUS DNA TETHERING COMPLEX E2:BRD4                     |
| 2NOJ        | C D                 | C        | CRYSTAL STRUCTURE OF EHP / C3D COMPLEX                                                    |
| 2NOJ        | C D                 | D        | CRYSTAL STRUCTURE OF EHP / C3D COMPLEX                                                    |
| 2NP0        | A B                 | B        | CRYSTAL STRUCTURE OF THE BOTULINUM NEUROTOXIN TYPE B COMPLEXED WITH SYNAPTOTAGAMI         |
| 2NPP        | A B                 | A        | STRUCTURE OF THE PROTEIN PHOSPHATASE 2A HOLOENZYME                                        |
| 2NPP        | A C                 | A        | STRUCTURE OF THE PROTEIN PHOSPHATASE 2A HOLOENZYME                                        |
| 2NPS        | A B                 | A        | CRYSTAL STRUCTURE OF THE EARLY ENDOSOMAL SNARE COMPLEX                                    |
| 2NPS        | A B                 | B        | CRYSTAL STRUCTURE OF THE EARLY ENDOSOMAL SNARE COMPLEX                                    |
| 2NPS        | A D                 | D        | CRYSTAL STRUCTURE OF THE EARLY ENDOSOMAL SNARE COMPLEX                                    |
| 2NPS        | B C                 | B        | CRYSTAL STRUCTURE OF THE EARLY ENDOSOMAL SNARE COMPLEX                                    |
| 2NPS        | B C                 | C        | CRYSTAL STRUCTURE OF THE EARLY ENDOSOMAL SNARE COMPLEX                                    |
| 2NPS        | C D                 | C        | CRYSTAL STRUCTURE OF THE EARLY ENDOSOMAL SNARE COMPLEX                                    |
| 2NPS        | C D                 | D        | CRYSTAL STRUCTURE OF THE EARLY ENDOSOMAL SNARE COMPLEX                                    |
| 2NS8        | B H                 | B        | HOW AN IN VITRO SELECTED PEPTIDE MIMICS THE ANTIBIOTIC TETRACYCLINE TO INDUCE TET REPRES  |
| 2NS8        | B H                 | B        | HOW AN IN VITRO SELECTED PEPTIDE MIMICS THE ANTIBIOTIC TETRACYCLINE TO INDUCE TET REPRES  |
| 2NTS        | PA                  | A        | CRYSTAL STRUCTURE OF SEK-HVB5.1                                                           |
| 2NTY        | B D                 | D        | ROP4-GDP-PRONE8                                                                           |
| 2NUD        | A C                 | A        | THE STRUCTURE OF THE TYPE III EFFECTOR AVR3B COMPLEXED WITH A HIGH-AFFINITY RIN4 PEPTIDE  |
| 2NVU        | A B                 | A        | STRUCTURE OF APPBP1-UBA3~NEDD8-NEDD8-MGATP-UBC12(C111A), A TRAPPED UBIQUITIN-LIKE PROTI   |
| 2NVU        | A B                 | A        | STRUCTURE OF APPBP1-UBA3~NEDD8-NEDD8-MGATP-UBC12(C111A), A TRAPPED UBIQUITIN-LIKE PROTI   |
| 2NVU        | A B                 | B        | STRUCTURE OF APPBP1-UBA3~NEDD8-NEDD8-MGATP-UBC12(C111A), A TRAPPED UBIQUITIN-LIKE PROTI   |
| 2NVU        | B C                 | B        | STRUCTURE OF APPBP1-UBA3~NEDD8-NEDD8-MGATP-UBC12(C111A), A TRAPPED UBIQUITIN-LIKE PROTI   |
| 2NVU        | C J                 | C        | STRUCTURE OF APPBP1-UBA3~NEDD8-NEDD8-MGATP-UBC12(C111A), A TRAPPED UBIQUITIN-LIKE PROTI   |
| 2NZ8        | A B                 | A        | N-TERMINAL DHPH CASSETTE OF TRIO IN COMPLEX WITH NUCLEOTIDE- FREE RAC1                    |
| 2NZ8        | A B                 | B        | N-TERMINAL DHPH CASSETTE OF TRIO IN COMPLEX WITH NUCLEOTIDE- FREE RAC1                    |
| 2NZU        | G L                 | L        | STRUCTURAL MECHANISM FOR THE FINE-TUNING OF CCPA FUNCTION BY THE SMALL MOLECULE EFFE      |
| 2O26        | B Y                 | B        | STRUCTURE OF A CLASS III RTK SIGNALING ASSEMBLY                                           |
| 2O26        | B Y                 | B        | STRUCTURE OF A CLASS III RTK SIGNALING ASSEMBLY                                           |
| 2O2V        | A B                 | A        | CRYSTAL STRUCTURE OF THE COMPLEX OF HUMAN MITOGEN ACTIVATED PROTEIN KINASE KINASE 5 P     |
| 2O60        | A B                 | A        | CALMODULIN BOUND TO PEPTIDE FROM NEURONAL NITRIC OXIDE SYNTHASE                           |
| 2O60        | A B                 | A        | CALMODULIN BOUND TO PEPTIDE FROM NEURONAL NITRIC OXIDE SYNTHASE                           |
| 2O8F        | A B                 | B        | HUMAN MUTSALPHA (MSH2/MSH6) BOUND TO DNA WITH A SINGLE BASE T INSERT                      |
| 2O8F        | A B                 | B        | HUMAN MUTSALPHA (MSH2/MSH6) BOUND TO DNA WITH A SINGLE BASE T INSERT                      |
| 2O9I        | A C                 | A        | CRYSTAL STRUCTURE OF THE HUMAN PREGNANE X RECEPTOR LBD IN COMPLEX WITH AN SRC-1 COAC      |
| 2O9I        | A C                 | A        | CRYSTAL STRUCTURE OF THE HUMAN PREGNANE X RECEPTOR LBD IN COMPLEX WITH AN SRC-1 COAC      |
| 2O9I        | B D                 | D        | CRYSTAL STRUCTURE OF THE HUMAN PREGNANE X RECEPTOR LBD IN COMPLEX WITH AN SRC-1 COAC      |
| 2OBH        | A C                 | A        | CENTRIN-XPC PEPTIDE                                                                       |
| 2OBH        | B D                 | B        | CENTRIN-XPC PEPTIDE                                                                       |
| 2OCF        | A D                 | A        | HUMAN ESTROGEN RECEPTOR ALPHA LIGAND-BINDING DOMAIN IN COMPLEX WITH ESTRADIOL AND I       |
| 2OCY        | A C                 | A        | COMPLEX OF THE GUANINE EXCHANGE FACTOR SEC2P AND THE RAB GTPASE SEC4P                     |
| 2ODB        | A B                 | A        | THE CRYSTAL STRUCTURE OF HUMAN CDC42 IN COMPLEX WITH THE CRIB DOMAIN OF HUMAN P21-AC      |
| 2ODE        | A B                 | B        | CRYSTAL STRUCTURE OF THE HETERODIMERIC COMPLEX OF HUMAN RGS8 AND ACTIVATED GI ALPHA       |
| 2ODE        | C B                 | B        | CRYSTAL STRUCTURE OF THE HETERODIMERIC COMPLEX OF HUMAN RGS8 AND ACTIVATED GI ALPHA       |
| 2ODE        | C D                 | D        | CRYSTAL STRUCTURE OF THE HETERODIMERIC COMPLEX OF HUMAN RGS8 AND ACTIVATED GI ALPHA       |
| 2ODY        | A B                 | A        | THROMBIN-BOUND BOOPHILIN DISPLAYS A FUNCTIONAL AND ACCESSIBLE REACTIVE-SITE LOOP          |
| 2ODY        | D F                 | F        | THROMBIN-BOUND BOOPHILIN DISPLAYS A FUNCTIONAL AND ACCESSIBLE REACTIVE-SITE LOOP          |
| 2OF5        | D J                 | D        | OLIGOMERIC DEATH DOMAIN COMPLEX                                                           |
| 2OF5        | E J                 | J        | OLIGOMERIC DEATH DOMAIN COMPLEX                                                           |
| 2OF5        | E K                 | E        | OLIGOMERIC DEATH DOMAIN COMPLEX                                                           |
| 2ONL        | A C                 | C        | CRYSTAL STRUCTURE OF THE P38A-MAPKAP KINASE 2 HETERODIMER                                 |
| 2ONL        | B D                 | B        | CRYSTAL STRUCTURE OF THE P38A-MAPKAP KINASE 2 HETERODIMER                                 |
| 2OOB        | A B                 | A        | CRYSTAL STRUCTURE OF THE UBA DOMAIN FROM CBL-B UBIQUITIN LIGASE IN COMPLEX WITH UBIQU     |
| 2OT3        | A B                 | B        | CRYSTAL STRUCTURE OF RABEX-5 VPS9 DOMAIN IN COMPLEX WITH NUCLEOTIDE FREE RAB21            |
| 2OV2        | C K                 | C        | THE CRYSTAL STRUCTURE OF THE HUMAN RAC3 IN COMPLEX WITH THE CRIB DOMAIN OF HUMAN P21-     |
| 2OV2        | G O                 | G        | THE CRYSTAL STRUCTURE OF THE HUMAN RAC3 IN COMPLEX WITH THE CRIB DOMAIN OF HUMAN P21-     |
| 2OVQ        | A B                 | A        | STRUCTURE OF THE SKP1-FBW7-CYCLINEDEGC COMPLEX                                            |
| 2OVQ        | A B                 | B        | STRUCTURE OF THE SKP1-FBW7-CYCLINEDEGC COMPLEX                                            |
| 2OZA        | A B                 | A        | STRUCTURE OF P38ALPHA COMPLEX                                                             |
| 2OZB        | A B                 | A        | STRUCTURE OF A HUMAN PRP31-15.5K-U4 SNRNA COMPLEX                                         |

TABLE S4

Jochim, et al

| A. PDB<br>CODE | E. FUNCTION                             | F. $\Delta\Delta G_{\text{AVG,HELIX}}$<br>(KCAL/MOL) | G. $\Delta\Delta G_{\text{SUM,HELIX}}$<br>(KCAL/MOL) | H. # HOTSPOT<br>RESIDUES | I. HELIX<br>LENGTH |
|----------------|-----------------------------------------|------------------------------------------------------|------------------------------------------------------|--------------------------|--------------------|
| 2KBR           | STRUCTURAL PROTEIN/CELL ADHESION        | 1.7                                                  | 3.3                                                  | 2                        | 14                 |
| 2KC8           | TOXIN/TOXIN REPRESSOR                   | 1.6                                                  | 6.4                                                  | 4                        | 15                 |
| 2NLA           | APOPTOSIS                               | 1.9                                                  | 3.8                                                  | 2                        | 21                 |
| 2NNU           | TRANSCRIPTION                           | 1.5                                                  | 3.0                                                  | 2                        | 23                 |
| 2NNU           | TRANSCRIPTION                           | 1.9                                                  | 5.6                                                  | 3                        | 24                 |
| 2NOJ           | IMMUNE SYSTEM                           | 1.1                                                  | 2.2                                                  | 2                        | 15                 |
| 2NOJ           | IMMUNE SYSTEM                           | 1.8                                                  | 3.6                                                  | 2                        | 14                 |
| 2NP0           | HYDROLASE                               | 1.9                                                  | 11.6                                                 | 6                        | 13                 |
| 2NPP           | SIGNALING PROTEIN, HYDROLASE            | 1.3                                                  | 2.6                                                  | 2                        | 16                 |
| 2NPP           | SIGNALING PROTEIN, HYDROLASE            | 1.7                                                  | 3.4                                                  | 2                        | 19                 |
| 2NPS           | TRANSPORT PROTEIN                       | 1.1                                                  | 3.4                                                  | 3                        | 52                 |
| 2NPS           | TRANSPORT PROTEIN                       | 1.7                                                  | 11.6                                                 | 7                        | 63                 |
| 2NPS           | TRANSPORT PROTEIN                       | 1.4                                                  | 13.7                                                 | 10                       | 58                 |
| 2NPS           | TRANSPORT PROTEIN                       | 1.2                                                  | 9.9                                                  | 8                        | 63                 |
| 2NPS           | TRANSPORT PROTEIN                       | 1.8                                                  | 10.7                                                 | 6                        | 57                 |
| 2NPS           | TRANSPORT PROTEIN                       | 1.6                                                  | 11.2                                                 | 7                        | 57                 |
| 2NPS           | TRANSPORT PROTEIN                       | 1.5                                                  | 13.1                                                 | 9                        | 58                 |
| 2NS8           | TRANSCRIPTION                           | 1.3                                                  | 2.5                                                  | 2                        | 31                 |
| 2NS8           | TRANSCRIPTION                           | 1.5                                                  | 4.4                                                  | 3                        | 14                 |
| 2NTS           | TOXIN/IMMUNE SYSTEM                     | 1.8                                                  | 5.3                                                  | 3                        | 11                 |
| 2NTY           | SIGNALING PROTEIN                       | 1.4                                                  | 2.7                                                  | 2                        | 19                 |
| 2NUD           | TOXIN/PROTEIN BINDING                   | 1.3                                                  | 2.5                                                  | 2                        | 16                 |
| 2NVU           | PROTEIN TURNOVER, LIGASE                | 1.9                                                  | 5.7                                                  | 3                        | 7                  |
| 2NVU           | PROTEIN TURNOVER, LIGASE                | 1.7                                                  | 5.0                                                  | 3                        | 21                 |
| 2NVU           | PROTEIN TURNOVER, LIGASE                | 1.7                                                  | 3.4                                                  | 2                        | 21                 |
| 2NVU           | PROTEIN TURNOVER, LIGASE                | 1.5                                                  | 2.9                                                  | 2                        | 10                 |
| 2NVU           | PROTEIN TURNOVER, LIGASE                | 1.7                                                  | 3.3                                                  | 2                        | 14                 |
| 2NZ8           | SIGNALING PROTEIN, CELL CYCLE           | 1.8                                                  | 3.6                                                  | 2                        | 9                  |
| 2NZ8           | SIGNALING PROTEIN, CELL CYCLE           | 1.2                                                  | 3.6                                                  | 3                        | 25                 |
| 2NZU           | TRANSCRIPTION                           | 1.5                                                  | 2.9                                                  | 2                        | 8                  |
| 2O26           | CYTOKINE/SIGNALING PROTEIN              | 1.8                                                  | 9.2                                                  | 5                        | 19                 |
| 2O26           | CYTOKINE/SIGNALING PROTEIN              | 1.9                                                  | 3.8                                                  | 2                        | 22                 |
| 2O2V           | TRANSFERASE                             | 1.2                                                  | 2.3                                                  | 2                        | 21                 |
| 2O60           | METAL BINDING PROTEIN                   | 1.8                                                  | 3.5                                                  | 2                        | 12                 |
| 2O60           | METAL BINDING PROTEIN                   | 1.2                                                  | 2.4                                                  | 2                        | 15                 |
| 2O8F           | DNA BINDING PROTEIN/DNA                 | 1.6                                                  | 4.7                                                  | 3                        | 16                 |
| 2O8F           | DNA BINDING PROTEIN/DNA                 | 1.7                                                  | 3.3                                                  | 2                        | 13                 |
| 2O9I           | TRANSCRIPTION                           | 1.8                                                  | 3.6                                                  | 2                        | 22                 |
| 2O9I           | TRANSCRIPTION                           | 1.7                                                  | 3.3                                                  | 2                        | 7                  |
| 2O9I           | TRANSCRIPTION                           | 1.5                                                  | 4.5                                                  | 3                        | 9                  |
| 2OBH           | CELL CYCLE                              | 1.2                                                  | 2.3                                                  | 2                        | 11                 |
| 2OBH           | CELL CYCLE                              | 1.3                                                  | 2.6                                                  | 2                        | 11                 |
| 2OCF           | HORMONE/GROWTH FACTOR                   | 1.7                                                  | 3.4                                                  | 2                        | 9                  |
| 2OCY           | ENDOCYTOSIS/EXOCYTOSIS                  | 1.7                                                  | 8.7                                                  | 5                        | 22                 |
| 2ODB           | PROTEIN BINDING                         | 1.3                                                  | 2.6                                                  | 2                        | 14                 |
| 2ODE           | SIGNALING PROTEIN                       | 1.5                                                  | 4.5                                                  | 3                        | 21                 |
| 2ODE           | SIGNALING PROTEIN                       | 1.3                                                  | 2.5                                                  | 2                        | 17                 |
| 2ODE           | SIGNALING PROTEIN                       | 1.6                                                  | 4.7                                                  | 3                        | 21                 |
| 2ODY           | BLOOD CLOTTING/BLOOD CLOTTING INHIBITOR | 1.8                                                  | 9.2                                                  | 5                        | 11                 |
| 2ODY           | BLOOD CLOTTING/BLOOD CLOTTING INHIBITOR | 1.5                                                  | 6.1                                                  | 4                        | 8                  |
| 2OF5           | APOPTOSIS                               | 1.4                                                  | 4.2                                                  | 3                        | 10                 |
| 2OF5           | APOPTOSIS                               | 1.5                                                  | 3.0                                                  | 2                        | 11                 |
| 2OF5           | APOPTOSIS                               | 1.9                                                  | 3.8                                                  | 2                        | 16                 |
| 2ONL           | TRANSFERASE                             | 1.4                                                  | 2.8                                                  | 2                        | 12                 |
| 2ONL           | TRANSFERASE                             | 1.8                                                  | 3.6                                                  | 2                        | 6                  |
| 2OOB           | LIGASE                                  | 1.5                                                  | 3.0                                                  | 2                        | 11                 |
| 2OT3           | PROTEIN TRANSPORT                       | 1.4                                                  | 4.3                                                  | 3                        | 7                  |
| 2OV2           | PROTEIN BINDING/TRANSFERASE             | 1.4                                                  | 2.8                                                  | 2                        | 14                 |
| 2OV2           | PROTEIN BINDING/TRANSFERASE             | 1.5                                                  | 3.0                                                  | 2                        | 14                 |
| 2OVQ           | TRANSCRIPTION/CELL CYCLE                | 1.9                                                  | 3.8                                                  | 2                        | 8                  |
| 2OVQ           | TRANSCRIPTION/CELL CYCLE                | 1.3                                                  | 2.6                                                  | 2                        | 10                 |
| 2OZA           | SIGNALING PROTEIN/TRANSFERASE           | 1.1                                                  | 3.3                                                  | 3                        | 19                 |
| 2OZB           | RNA BINDING PROTEIN/RNA                 | 1.1                                                  | 2.2                                                  | 2                        | 10                 |

TABLE S4

Jochim, et al

| A. PDB<br>CODE | J. HELIX START<br>RESIDUE # | K. HELIX END<br>RESIDUE # |
|----------------|-----------------------------|---------------------------|
| 2KBR           | 103                         | 116                       |
| 2KC8           | 54                          | 68                        |
| 2NLA           | 261                         | 281                       |
| 2NNU           | 62                          | 84                        |
| 2NNU           | 26                          | 49                        |
| 2NOJ           | 1018                        | 1032                      |
| 2NOJ           | 71                          | 84                        |
| 2NP0           | 47                          | 59                        |
| 2NPP           | 179                         | 194                       |
| 2NPP           | 417                         | 435                       |
| 2NPS           | 60                          | 111                       |
| 2NPS           | 184                         | 246                       |
| 2NPS           | 173                         | 230                       |
| 2NPS           | 184                         | 246                       |
| 2NPS           | 131                         | 187                       |
| 2NPS           | 131                         | 187                       |
| 2NPS           | 173                         | 230                       |
| 2NS8           | 127                         | 157                       |
| 2NS8           | 168                         | 181                       |
| 2NTS           | 4                           | 14                        |
| 2NTY           | 90                          | 108                       |
| 2NUD           | 184                         | 199                       |
| 2NVU           | 14                          | 20                        |
| 2NVU           | 491                         | 511                       |
| 2NVU           | 2293                        | 2313                      |
| 2NVU           | 2040                        | 2049                      |
| 2NVU           | 125                         | 138                       |
| 2NZ8           | 65                          | 73                        |
| 2NZ8           | 1359                        | 1383                      |
| 2NZU           | 47                          | 54                        |
| 2O26           | 72                          | 90                        |
| 2O26           | 41                          | 62                        |
| 2O2V           | 75                          | 95                        |
| 2O60           | 118                         | 129                       |
| 2O60           | 6                           | 20                        |
| 2O8F           | 1310                        | 1325                      |
| 2O8F           | 1189                        | 1201                      |
| 2O9I           | 240                         | 261                       |
| 2O9I           | 423                         | 429                       |
| 2O9I           | 1631                        | 1639                      |
| 2OBH           | 123                         | 133                       |
| 2OBH           | 123                         | 133                       |
| 2OCF           | 538                         | 546                       |
| 2OCY           | 93                          | 114                       |
| 2ODB           | 165                         | 178                       |
| 2ODE           | 144                         | 164                       |
| 2ODE           | 98                          | 114                       |
| 2ODE           | 144                         | 164                       |
| 2ODY           | 14                          | 14                        |
| 2ODY           | 132                         | 139                       |
| 2OF5           | 117                         | 126                       |
| 2OF5           | 814                         | 824                       |
| 2OF5           | 156                         | 171                       |
| 2ONL           | 381                         | 392                       |
| 2ONL           | 113                         | 118                       |
| 2OOB           | 932                         | 942                       |
| 2OT3           | 84                          | 90                        |
| 2OV2           | 165                         | 178                       |
| 2OV2           | 165                         | 178                       |
| 2OVQ           | 1132                        | 1139                      |
| 2OVQ           | 2286                        | 2295                      |
| 2OZA           | 346                         | 364                       |
| 2OZB           | 39                          | 48                        |

| A. PDB<br>CODE | L. HELIX SEQUENCE                                                |
|----------------|------------------------------------------------------------------|
| 2KBR           | RYLREAIQEYDNIA                                                   |
| 2KC8           | EDAELVEIVKERLRN                                                  |
| 2NLA           | WGRIVTLISFGAFVAKHLKTI                                            |
| 2NNU           | LAVSKNKALQAIELQLTLETIYN                                          |
| 2NNU           | LRDHIDYWKHMRLECAIYYKAREM                                         |
| 2NOJ           | MTPTVIAVHYLDETE                                                  |
| 2NOJ           | VATHRKAQRAVNLI                                                   |
| 2NP0           | FAKLKEKFFNEIN                                                    |
| 2NPP           | PMVRRAAASKLGEFAK                                                 |
| 2NPP           | WRVRLAIIHEYMPLLAGQLG                                             |
| 2NPS           | QVDEVIDVMQENITK VIERGERLDELQDKSESLSDNATAFNSNRSKQLRRQMW           |
| 2NPS           | RETAIQQLEADILDVNQIFKDLAMMIHDQGDLDISIEANVESSEVHVVERASDQLQRAAYYQKK |
| 2NPS           | LELVSGSIGVLKNMSQRIGGELEEQAVMLEDFSHLESTQSRLDNVMKKLAKVSHMTS        |
| 2NPS           | RETAIQQLEADILDVNQIFKDLAMMIHDQGDLDISIEANVESSEVHVVERASDQLQRAAYYQKK |
| 2NPS           | RLEAGYQIAVETEIQIGQEMLNLSHDRERIQRARERLRETDANLGKSSRILTGMMLRR       |
| 2NPS           | RLEAGYQIAVETEIQIGQEMLNLSHDRERIQRARERLRETDANLGKSSRILTGMMLRR       |
| 2NPS           | LELVSGSIGVLKNMSQRIGGELEEQAVMLEDFSHLESTQSRLDNVMKKLAKVSHMTS        |
| 2NS8           | LENALYALSAVGHFTLGSVLEDQEHQVAKEE                                  |
| 2NS8           | PLLRQAIELFDHQG                                                   |
| 2NTS           | IGIDNLRNFYT                                                      |
| 2NTY           | KASYENVAKKWIPELRHYA                                              |
| 2NUD           | TEYLRDRVAHLRTELG                                                 |
| 2NVU           | DRQLRLW                                                          |
| 2NVU           | HTIAAFLGGAAAQEVIKIITK                                            |
| 2NVU           | ASTNAVIAAVCATEVFKIATS                                            |
| 2NVU           | ESLQFLDTC                                                        |
| 2NVU           | INSIHYGLQYLFLE                                                   |
| 2NZ8           | DRLRPLSYP                                                        |
| 2NZ8           | ISSYLIKPVQRITKYQLLLKELLTC                                        |
| 2NZU           | IMGVMSLG                                                         |
| 2O26           | NYSIIDKLGKIVDDLVLCM                                              |
| 2O26           | SHCWLRDMVIQLSLSLTLLDK                                            |
| 2O2V           | DEEMKAMLSYYYSTVMEQQVN                                            |
| 2O60           | DEEVDEMIREAD                                                     |
| 2O60           | EEQIAEFKEAFSLFD                                                  |
| 2O8F           | EEVIQKGHRKAREFEK                                                 |
| 2O8F           | TFFVELSETASIL                                                    |
| 2O9I           | LPHMADMSTYMFKGHSFAKVI                                            |
| 2O9I           | PLMQELF                                                          |
| 2O9I           | KILHRLLQE                                                        |
| 2OBH           | FKNLKRVAKEL                                                      |
| 2OBH           | FKNLKRVAKEL                                                      |
| 2OCF           | DLLLEMLDA                                                        |
| 2OCY           | EADKLNKEVEDLTASLFDEANN                                           |
| 2ODB           | LKNVFDEAILAALE                                                   |
| 2ODE           | DQAQGVVHSLMEKDSYPRFLR                                            |
| 2ODE           | TAKLVSKAHRIFEEDVD                                                |
| 2ODE           | DQAQGVVHSLMEKDSYPRFLR                                            |
| 2ODY           | EKELFESYIEG                                                      |
| 2ODY           | EECELVC                                                          |
| 2OF5           | DRQINQLAQR                                                       |
| 2OF5           | YREVQRIRHEF                                                      |
| 2OF5           | VQSQVVEAFIRWRQRF                                                 |
| 2ONL           | PLLLKRRKKARA                                                     |
| 2ONL           | LNNIVK                                                           |
| 2OOB           | VDAKIAKLMGE                                                      |
| 2OT3           | LGPIYYR                                                          |
| 2OV2           | LKTVFDEAIRAVLG                                                   |
| 2OV2           | LKTVFDEAIRAVLG                                                   |
| 2OVQ           | PEEIRKTF                                                         |
| 2OVQ           | KELALYVLSF                                                       |
| 2OZA           | KERWEDVKEEMTSALATMR                                              |
| 2OZB           | ANEATKTLNR                                                       |



| A. PDB<br>CODE | M. RESOLUTION |
|----------------|---------------|
| 2KBR           | NOT APP       |
| 2KC8           | NOT APP       |
| 2NLA           | 2.8           |
| 2NNU           | 1.59          |
| 2NNU           | 1.59          |
| 2NOJ           | 2.7           |
| 2NOJ           | 2.7           |
| 2NP0           | 2.62          |
| 2NPP           | 3.3           |
| 2NPP           | 3.3           |
| 2NPS           | 2.5           |
| 2NPS           | 2.5           |
| 2NPS           | 2.5           |
| 2NPS           | 2.5           |
| 2NPS           | 2.5           |
| 2NPS           | 2.5           |
| 2NPS           | 2.5           |
| 2NS8           | 2.55          |
| 2NS8           | 2.55          |
| 2NTS           | 2.4           |
| 2NTY           | 3.1           |
| 2NUD           | 2.3           |
| 2NVU           | 2.8           |
| 2NVU           | 2.8           |
| 2NVU           | 2.8           |
| 2NVU           | 2.8           |
| 2NVU           | 2.8           |
| 2NZ8           | 2             |
| 2NZ8           | 2             |
| 2NZU           | 2.5           |
| 2O26           | 2.5           |
| 2O26           | 2.5           |
| 2O2V           | 1.83          |
| 2O60           | 1.55          |
| 2O60           | 1.55          |
| 2O8F           | 3.25          |
| 2O8F           | 3.25          |
| 2O9I           | 2.8           |
| 2O9I           | 2.8           |
| 2O9I           | 2.8           |
| 2OBH           | 1.8           |
| 2OBH           | 1.8           |
| 2OCF           | 2.95          |
| 2OCY           | 3.3           |
| 2ODB           | 2.4           |
| 2ODE           | 1.9           |
| 2ODE           | 1.9           |
| 2ODE           | 1.9           |
| 2ODY           | 2.35          |
| 2ODY           | 2.35          |
| 2OF5           | 3.2           |
| 2OF5           | 3.2           |
| 2OF5           | 3.2           |
| 2ONL           | 4             |
| 2ONL           | 4             |
| 2OOB           | 1.9           |
| 2OT3           | 2.1           |
| 2OV2           | 2.1           |
| 2OV2           | 2.1           |
| 2OVQ           | 2.6           |
| 2OVQ           | 2.6           |
| 2OZA           | 2.7           |
| 2OZB           | 2.6           |

| A. PDB CODE | B. INTERFACE CHAINS | C. CHAIN | D. TITLE                                                                                  |
|-------------|---------------------|----------|-------------------------------------------------------------------------------------------|
| 2P1L        | C D                 | C        | STRUCTURE OF THE BCL-XL:BECLIN 1 COMPLEX                                                  |
| 2P1L        | C D                 | C        | STRUCTURE OF THE BCL-XL:BECLIN 1 COMPLEX                                                  |
| 2P1L        | C D                 | D        | STRUCTURE OF THE BCL-XL:BECLIN 1 COMPLEX                                                  |
| 2P1L        | E F                 | E        | STRUCTURE OF THE BCL-XL:BECLIN 1 COMPLEX                                                  |
| 2P1L        | G H                 | G        | STRUCTURE OF THE BCL-XL:BECLIN 1 COMPLEX                                                  |
| 2P1N        | A B                 | A        | MECHANISM OF AUXIN PERCEPTION BY THE TIR1 UBIQUITIN LIGASE                                |
| 2P1N        | A B                 | B        | MECHANISM OF AUXIN PERCEPTION BY THE TIR1 UBIQUITIN LIGASE                                |
| 2P1N        | D E                 | D        | MECHANISM OF AUXIN PERCEPTION BY THE TIR1 UBIQUITIN LIGASE                                |
| 2P1N        | D E                 | E        | MECHANISM OF AUXIN PERCEPTION BY THE TIR1 UBIQUITIN LIGASE                                |
| 2P22        | A B                 | A        | STRUCTURE OF THE YEAST ESCRT-I HETEROTETRAMER CORE                                        |
| 2P22        | A B                 | B        | STRUCTURE OF THE YEAST ESCRT-I HETEROTETRAMER CORE                                        |
| 2P22        | A C                 | A        | STRUCTURE OF THE YEAST ESCRT-I HETEROTETRAMER CORE                                        |
| 2P22        | A C                 | A        | STRUCTURE OF THE YEAST ESCRT-I HETEROTETRAMER CORE                                        |
| 2P22        | A C                 | C        | STRUCTURE OF THE YEAST ESCRT-I HETEROTETRAMER CORE                                        |
| 2P22        | A C                 | C        | STRUCTURE OF THE YEAST ESCRT-I HETEROTETRAMER CORE                                        |
| 2P22        | A C                 | C        | STRUCTURE OF THE YEAST ESCRT-I HETEROTETRAMER CORE                                        |
| 2P22        | A D                 | A        | STRUCTURE OF THE YEAST ESCRT-I HETEROTETRAMER CORE                                        |
| 2P22        | A D                 | A        | STRUCTURE OF THE YEAST ESCRT-I HETEROTETRAMER CORE                                        |
| 2P22        | C D                 | D        | STRUCTURE OF THE YEAST ESCRT-I HETEROTETRAMER CORE                                        |
| 2P5T        | A B                 | A        | MOLECULAR AND STRUCTURAL CHARACTERIZATION OF THE PEZAT CHROMOSOMAL TOXIN-ANTITOXI         |
| 2P5T        | A B                 | A        | MOLECULAR AND STRUCTURAL CHARACTERIZATION OF THE PEZAT CHROMOSOMAL TOXIN-ANTITOXI         |
| 2P5T        | A B                 | B        | MOLECULAR AND STRUCTURAL CHARACTERIZATION OF THE PEZAT CHROMOSOMAL TOXIN-ANTITOXI         |
| 2P5T        | C D                 | D        | MOLECULAR AND STRUCTURAL CHARACTERIZATION OF THE PEZAT CHROMOSOMAL TOXIN-ANTITOXI         |
| 2P5T        | C D                 | D        | MOLECULAR AND STRUCTURAL CHARACTERIZATION OF THE PEZAT CHROMOSOMAL TOXIN-ANTITOXI         |
| 2P5T        | E F                 | F        | MOLECULAR AND STRUCTURAL CHARACTERIZATION OF THE PEZAT CHROMOSOMAL TOXIN-ANTITOXI         |
| 2P6A        | A C                 | C        | THE STRUCTURE OF THE ACTIVIN:FOLLISTATIN 315 COMPLEX                                      |
| 2P6A        | A D                 | D        | THE STRUCTURE OF THE ACTIVIN:FOLLISTATIN 315 COMPLEX                                      |
| 2P7V        | A B                 | A        | CRYSTAL STRUCTURE OF THE ESCHERICHIA COLI REGULATOR OF SIGMA 70, RSD, IN COMPLEX WITH SI  |
| 2P7V        | A B                 | B        | CRYSTAL STRUCTURE OF THE ESCHERICHIA COLI REGULATOR OF SIGMA 70, RSD, IN COMPLEX WITH SI  |
| 2PBD        | A V                 | V        | TERNARY COMPLEX OF PROFILIN-ACTIN WITH THE POLY-PRO-GAB DOMAIN OF VASP*                   |
| 2PBI        | A B                 | A        | THE MULTIFUNCTIONAL NATURE OF GBETA5/RGS9 REVEALED FROM ITS CRYSTAL STRUCTURE             |
| 2PBI        | A B                 | B        | THE MULTIFUNCTIONAL NATURE OF GBETA5/RGS9 REVEALED FROM ITS CRYSTAL STRUCTURE             |
| 2PBI        | C D                 | C        | THE MULTIFUNCTIONAL NATURE OF GBETA5/RGS9 REVEALED FROM ITS CRYSTAL STRUCTURE             |
| 2PBI        | C D                 | C        | THE MULTIFUNCTIONAL NATURE OF GBETA5/RGS9 REVEALED FROM ITS CRYSTAL STRUCTURE             |
| 2PBI        | C D                 | C        | THE MULTIFUNCTIONAL NATURE OF GBETA5/RGS9 REVEALED FROM ITS CRYSTAL STRUCTURE             |
| 2PBI        | C D                 | C        | THE MULTIFUNCTIONAL NATURE OF GBETA5/RGS9 REVEALED FROM ITS CRYSTAL STRUCTURE             |
| 2PBI        | C D                 | D        | THE MULTIFUNCTIONAL NATURE OF GBETA5/RGS9 REVEALED FROM ITS CRYSTAL STRUCTURE             |
| 2PG1        | D K                 | D        | STRUCTURAL ANALYSIS OF A CYTOPLASMIC DYNEIN LIGHT CHAIN- INTERMEDIATE CHAIN COMPLEX       |
| 2PHG        | A B                 | B        | MODEL FOR VP16 BINDING TO TFIIIB                                                          |
| 2PJW        | H V                 | H        | THE VPS27/HSE1 COMPLEX IS A GAT DOMAIN-BASED SCAFFOLD FOR UBIQUITIN-DEPENDENT SORTING     |
| 2PJW        | H V                 | V        | THE VPS27/HSE1 COMPLEX IS A GAT DOMAIN-BASED SCAFFOLD FOR UBIQUITIN-DEPENDENT SORTING     |
| 2PK9        | A B                 | A        | STRUCTURE OF THE PHO85-PHO80 CDK-CYCLIN COMPLEX OF THE PHOSPHATE-RESPONSIVE SIGNAL TR     |
| 2PL9        | A D                 | A        | CRYSTAL STRUCTURE OF CHEY-MG(2+)-BEF(3)(-) IN COMPLEX WITH CHEZ(C19) PEPTIDE SOLVED FROM. |
| 2PL9        | A D                 | D        | CRYSTAL STRUCTURE OF CHEY-MG(2+)-BEF(3)(-) IN COMPLEX WITH CHEZ(C19) PEPTIDE SOLVED FROM. |
| 2PMS        | B D                 | D        | CRYSTAL STRUCTURE OF THE COMPLEX OF HUMAN LACTOFERRIN N- LOBE AND LACTOFERRIN-BINDIN      |
| 2PMS        | B D                 | D        | CRYSTAL STRUCTURE OF THE COMPLEX OF HUMAN LACTOFERRIN N- LOBE AND LACTOFERRIN-BINDIN      |
| 2PO6        | G H                 | H        | CRYSTAL STRUCTURE OF CD1D-LIPID-ANTIGEN COMPLEXED WITH BETA- 2-MICROGLOBULIN, NKT15 AI    |
| 2PON        | A B                 | B        | SOLUTION STRUCTURE OF THE BCL-XL/BECLIN-1 COMPLEX                                         |
| 2PQ4        | A B                 | B        | NMR SOLUTION STRUCTURE OF NAPD IN COMPLEX WITH NAPA1-35 SIGNAL PEPTIDE                    |
| 2PQR        | A C                 | A        | CRYSTAL STRUCTURE OF YEAST FIS1 COMPLEXED WITH A FRAGMENT OF YEAST CAF4                   |
| 2PQR        | A C                 | A        | CRYSTAL STRUCTURE OF YEAST FIS1 COMPLEXED WITH A FRAGMENT OF YEAST CAF4                   |
| 2PQR        | A C                 | A        | CRYSTAL STRUCTURE OF YEAST FIS1 COMPLEXED WITH A FRAGMENT OF YEAST CAF4                   |
| 2PRG        | B C                 | C        | LIGAND-BINDING DOMAIN OF THE HUMAN PEROXISOME PROLIFERATOR ACTIVATED RECEPTOR GAMM        |
| 2PSM        | A F                 | A        | CRYSTAL STRUCTURE OF INTERLEUKIN 15 IN COMPLEX WITH INTERLEUKIN 15 RECEPTOR ALPHA         |
| 2Q00        | A C                 | A        | CRYSTAL STRUCTURE OF AN ANTI-ACTIVATION COMPLEX IN BACTERIAL QUORUM SENSING               |
| 2Q00        | A C                 | C        | CRYSTAL STRUCTURE OF AN ANTI-ACTIVATION COMPLEX IN BACTERIAL QUORUM SENSING               |
| 2Q86        | A B                 | B        | STRUCTURE OF THE MOUSE INVARIANT NKT CELL RECEPTOR VALPHA14                               |
| 2Q97        | A T                 | T        | COMPLEX OF MAMMALIAN ACTIN WITH TOXOFILIN FROM TOXOPLASMA GONDII                          |
| 2Q97        | A T                 | T        | COMPLEX OF MAMMALIAN ACTIN WITH TOXOFILIN FROM TOXOPLASMA GONDII                          |
| 2QCS        | A B                 | B        | A COMPLEX STRUCTURE BETWEEN THE CATALYTIC AND REGULATORY SUBUNIT OF PROTEIN KINASE A      |
| 2QFA        | A B                 | B        | CRYSTAL STRUCTURE OF A SURVIVIN-BOREALIN-INCENP CORE COMPLEX                              |
| 2QFA        | A C                 | A        | CRYSTAL STRUCTURE OF A SURVIVIN-BOREALIN-INCENP CORE COMPLEX                              |

TABLE S4

Jochim, et al

| A. PDB<br>CODE | E. FUNCTION                              | F. $\Delta\Delta G_{\text{AVG,HELIX}}$<br>(KCAL/MOL) | G. $\Delta\Delta G_{\text{SUM,HELIX}}$<br>(KCAL/MOL) | H. # HOTSPOT<br>RESIDUES | I. HELIX<br>LENGTH |
|----------------|------------------------------------------|------------------------------------------------------|------------------------------------------------------|--------------------------|--------------------|
| 2P1L           | APOPTOSIS                                | 1.3                                                  | 3.9                                                  | 3                        | 13                 |
| 2P1L           | APOPTOSIS                                | 1.7                                                  | 3.4                                                  | 2                        | 24                 |
| 2P1L           | APOPTOSIS                                | 1.8                                                  | 11.0                                                 | 6                        | 21                 |
| 2P1L           | APOPTOSIS                                | 1.3                                                  | 2.6                                                  | 2                        | 13                 |
| 2P1L           | APOPTOSIS                                | 1.2                                                  | 3.6                                                  | 3                        | 16                 |
| 2P1N           | SIGNALING PROTEIN                        | 1.8                                                  | 8.8                                                  | 5                        | 16                 |
| 2P1N           | SIGNALING PROTEIN                        | 1.6                                                  | 8.1                                                  | 5                        | 9                  |
| 2P1N           | SIGNALING PROTEIN                        | 1.3                                                  | 2.6                                                  | 2                        | 16                 |
| 2P1N           | SIGNALING PROTEIN                        | 1.3                                                  | 2.6                                                  | 2                        | 7                  |
| 2P22           | TRANSPORT PROTEIN                        | 1.7                                                  | 10.2                                                 | 6                        | 28                 |
| 2P22           | TRANSPORT PROTEIN                        | 1.7                                                  | 3.4                                                  | 2                        | 28                 |
| 2P22           | TRANSPORT PROTEIN                        | 1.7                                                  | 5.2                                                  | 3                        | 34                 |
| 2P22           | TRANSPORT PROTEIN                        | 1.7                                                  | 10.2                                                 | 6                        | 35                 |
| 2P22           | TRANSPORT PROTEIN                        | 1.8                                                  | 7.1                                                  | 4                        | 29                 |
| 2P22           | TRANSPORT PROTEIN                        | 1.3                                                  | 2.5                                                  | 2                        | 10                 |
| 2P22           | TRANSPORT PROTEIN                        | 1.8                                                  | 3.5                                                  | 2                        | 11                 |
| 2P22           | TRANSPORT PROTEIN                        | 1.8                                                  | 9.0                                                  | 5                        | 38                 |
| 2P22           | TRANSPORT PROTEIN                        | 1.3                                                  | 2.6                                                  | 2                        | 30                 |
| 2P22           | TRANSPORT PROTEIN                        | 1.3                                                  | 3.8                                                  | 3                        | 34                 |
| 2P22           | TRANSPORT PROTEIN                        | 1.5                                                  | 9.2                                                  | 6                        | 27                 |
| 2P5T           | TRANSCRIPTION REGULATOR                  | 1.5                                                  | 16.8                                                 | 11                       | 31                 |
| 2P5T           | TRANSCRIPTION REGULATOR                  | 1.6                                                  | 3.1                                                  | 2                        | 14                 |
| 2P5T           | TRANSCRIPTION REGULATOR                  | 1.5                                                  | 2.9                                                  | 2                        | 12                 |
| 2P5T           | TRANSCRIPTION REGULATOR                  | 1.0                                                  | 2.0                                                  | 2                        | 17                 |
| 2P5T           | TRANSCRIPTION REGULATOR                  | 1.9                                                  | 3.7                                                  | 2                        | 12                 |
| 2P5T           | TRANSCRIPTION REGULATOR                  | 1.3                                                  | 2.6                                                  | 2                        | 13                 |
| 2P6A           | SIGNALING PROTEIN                        | 1.5                                                  | 4.4                                                  | 3                        | 9                  |
| 2P6A           | SIGNALING PROTEIN                        | 1.1                                                  | 2.1                                                  | 2                        | 12                 |
| 2P7V           | TRANSCRIPTION                            | 1.5                                                  | 5.9                                                  | 4                        | 27                 |
| 2P7V           | TRANSCRIPTION                            | 1.7                                                  | 3.3                                                  | 2                        | 15                 |
| 2PBD           | STRUCTURAL PROTEIN                       | 1.8                                                  | 3.5                                                  | 2                        | 7                  |
| 2PBI           | SIGNALING PROTEIN                        | 1.6                                                  | 3.1                                                  | 2                        | 21                 |
| 2PBI           | SIGNALING PROTEIN                        | 1.6                                                  | 6.4                                                  | 4                        | 24                 |
| 2PBI           | SIGNALING PROTEIN                        | 1.2                                                  | 2.4                                                  | 2                        | 14                 |
| 2PBI           | SIGNALING PROTEIN                        | 1.0                                                  | 2.0                                                  | 2                        | 13                 |
| 2PBI           | SIGNALING PROTEIN                        | 1.9                                                  | 3.8                                                  | 2                        | 14                 |
| 2PBI           | SIGNALING PROTEIN                        | 1.8                                                  | 8.8                                                  | 5                        | 15                 |
| 2PBI           | SIGNALING PROTEIN                        | 1.4                                                  | 4.1                                                  | 3                        | 22                 |
| 2PG1           | STRUCTURAL PROTEIN                       | 1.9                                                  | 5.7                                                  | 3                        | 16                 |
| 2PHG           | TRANSCRIPTION                            | 1.6                                                  | 4.9                                                  | 3                        | 9                  |
| 2PJW           | ENDOCYTOSIS/EXOCYTOSIS                   | 1.6                                                  | 4.8                                                  | 3                        | 15                 |
| 2PJW           | ENDOCYTOSIS/EXOCYTOSIS                   | 1.6                                                  | 6.4                                                  | 4                        | 32                 |
| 2PK9           | SIGNALING PROTEIN,TRANSFERASE/CELL CYCLE | 1.7                                                  | 8.6                                                  | 5                        | 12                 |
| 2PL9           | SIGNALING PROTIEN                        | 1.6                                                  | 3.2                                                  | 2                        | 10                 |
| 2PL9           | SIGNALING PROTIEN                        | 1.6                                                  | 8.2                                                  | 5                        | 11                 |
| 2PMS           | METAL TRANSPORT, HYDROLASE               | 1.2                                                  | 2.3                                                  | 2                        | 38                 |
| 2PMS           | METAL TRANSPORT, HYDROLASE               | 1.9                                                  | 7.6                                                  | 4                        | 19                 |
| 2PO6           | LIPID BINDING PROTEIN/IMMUNE SYSTEM      | 1.3                                                  | 2.6                                                  | 2                        | 7                  |
| 2PON           | APOPTOSIS INHIBITOR                      | 1.3                                                  | 2.6                                                  | 2                        | 13                 |
| 2PQ4           | CHAPERONE/OXIDOREDUCTASE                 | 1.9                                                  | 3.8                                                  | 2                        | 17                 |
| 2PQR           | APOPTOSIS                                | 1.9                                                  | 3.7                                                  | 2                        | 14                 |
| 2PQR           | APOPTOSIS                                | 1.4                                                  | 2.7                                                  | 2                        | 15                 |
| 2PQR           | APOPTOSIS                                | 1.5                                                  | 5.9                                                  | 4                        | 18                 |
| 2PRG           | COMPLEX (THIAZOLIDINEDIONE/RECEPTOR)     | 1.3                                                  | 3.8                                                  | 3                        | 9                  |
| 2PSM           | CYTOKINE                                 | 1.2                                                  | 3.5                                                  | 3                        | 19                 |
| 2Q00           | TRANSCRIPTION                            | 1.6                                                  | 4.7                                                  | 3                        | 12                 |
| 2Q00           | TRANSCRIPTION                            | 1.6                                                  | 6.5                                                  | 4                        | 33                 |
| 2Q86           | IMMUNE SYSTEM                            | 1.2                                                  | 2.3                                                  | 2                        | 8                  |
| 2Q97           | STRUCTURAL PROTEIN/CELL INVASION         | 1.8                                                  | 7.1                                                  | 4                        | 15                 |
| 2Q97           | STRUCTURAL PROTEIN/CELL INVASION         | 1.3                                                  | 6.6                                                  | 5                        | 17                 |
| 2QCS           | TRANSFERASE/TRANSFERASE INHIBITOR        | 1.9                                                  | 3.8                                                  | 2                        | 6                  |
| 2QFA           | CELL CYCLE/CELL CYCLE/CELL CYCLE         | 1.9                                                  | 17.1                                                 | 9                        | 46                 |
| 2QFA           | CELL CYCLE/CELL CYCLE/CELL CYCLE         | 1.7                                                  | 6.8                                                  | 4                        | 43                 |

TABLE S4

Jochim, et al

| A. PDB<br>CODE | J. HELIX START<br>RESIDUE # | K. HELIX END<br>RESIDUE # |
|----------------|-----------------------------|---------------------------|
| 2P1L           | 119                         | 131                       |
| 2P1L           | 26                          | 105                       |
| 2P1L           | 106                         | 126                       |
| 2P1L           | 119                         | 131                       |
| 2P1L           | 116                         | 131                       |
| 2P1N           | 111                         | 126                       |
| 2P1N           | 24                          | 32                        |
| 2P1N           | 111                         | 126                       |
| 2P1N           | 35                          | 41                        |
| 2P22           | 356                         | 383                       |
| 2P22           | 31                          | 58                        |
| 2P22           | 254                         | 287                       |
| 2P22           | 219                         | 253                       |
| 2P22           | 178                         | 206                       |
| 2P22           | 62                          | 71                        |
| 2P22           | 72                          | 82                        |
| 2P22           | 86                          | 123                       |
| 2P22           | 323                         | 352                       |
| 2P22           | 254                         | 287                       |
| 2P22           | 40                          | 66                        |
| 2P5T           | 69                          | 99                        |
| 2P5T           | 110                         | 123                       |
| 2P5T           | 45                          | 56                        |
| 2P5T           | 8                           | 24                        |
| 2P5T           | 45                          | 56                        |
| 2P5T           | 234                         | 246                       |
| 2P6A           | 45                          | 53                        |
| 2P6A           | 188                         | 199                       |
| 2P7V           | 52                          | 78                        |
| 2P7V           | 584                         | 598                       |
| 2PBD           | 225                         | 231                       |
| 2PBI           | 386                         | 406                       |
| 2PBI           | 10                          | 33                        |
| 2PBI           | 15                          | 28                        |
| 2PBI           | 52                          | 64                        |
| 2PBI           | 67                          | 80                        |
| 2PBI           | 240                         | 254                       |
| 2PBI           | 12                          | 33                        |
| 2PG1           | 35                          | 50                        |
| 2PHG           | 477                         | 485                       |
| 2PJW           | 296                         | 310                       |
| 2PJW           | 381                         | 412                       |
| 2PK9           | 48                          | 59                        |
| 2PL9           | 92                          | 101                       |
| 2PL9           | 202                         | 212                       |
| 2PMS           | 212                         | 249                       |
| 2PMS           | 174                         | 192                       |
| 2PO6           | 135                         | 141                       |
| 2PON           | 135                         | 147                       |
| 2PQ4           | 5                           | 21                        |
| 2PQR           | 39                          | 52                        |
| 2PQR           | 76                          | 90                        |
| 2PQR           | 55                          | 72                        |
| 2PRG           | 688                         | 696                       |
| 2PSM           | 36                          | 54                        |
| 2Q00           | 178                         | 189                       |
| 2Q00           | 64                          | 96                        |
| 2Q86           | 128                         | 135                       |
| 2Q97           | 104                         | 118                       |
| 2Q97           | 132                         | 148                       |
| 2QCS           | 200                         | 205                       |
| 2QFA           | 16                          | 61                        |
| 2QFA           | 98                          | 140                       |

| A. PDB<br>CODE | L. HELIX SEQUENCE                             |
|----------------|-----------------------------------------------|
| 2P1L           | AYQSFEQVVNELF                                 |
| 2P1L           | QMAAVKQALREAGDEFELRYRRAF                      |
| 2P1L           | SGTMENLSRRLKVTGDLFDIM                         |
| 2P1L           | AYQSFEQVVNELF                                 |
| 2P1L           | PGTAYQSFEQVVNELF                              |
| 2P1N           | KNLLDLTCQTVADMIK                              |
| 2P1N           | DKDRNSVSL                                     |
| 2P1N           | KNLLDLTCQTVADMIK                              |
| 2P1N           | KSWYEIE                                       |
| 2P22           | LDTFVKQGRELARQQFLVRWHIQRITSP                  |
| 2P22           | SKDKEVIETLSEIYSIVITLDHVEKAYL                  |
| 2P22           | MQESIARFHEIIAIDKNHLRAVEQAIEQTMHSLN            |
| 2P22           | TNNHEMLQNLQTVVNELYREDVDYVADKILTRQTV           |
| 2P22           | ADDLDQFIKNYLDIRTQYHLRREKLATWD                 |
| 2P22           | KEIIDLIQTH                                    |
| 2P22           | RHQLELYVTKF                                   |
| 2P22           | TDFAGKIHAFRDQFKQLEENFEDLHEQDKVQALLEN          |
| 2P22           | DGLNQLYNLVAQDYALTDTIECLSRMLHRG                |
| 2P22           | MQESIARFHEIIAIDKNHLRAVEQAIEQTMHSLN            |
| 2P22           | LQPTRDLLCPWYEECDNITKVCQLHDS                   |
| 2P5T           | PVEDYELTLKIEIVKERGANLLSRLRYQDS                |
| 2P5T           | PWILMSDDLSDLIH                                |
| 2P5T           | KTTIHRIKQKEF                                  |
| 2P5T           | DSEFKHALARNLRSLTR                             |
| 2P5T           | KTTIHRIKQKEF                                  |
| 2P5T           | QVEKEMLQVGEKR                                 |
| 2P6A           | TLFKWMIFN                                     |
| 2P6A           | ACHLRKATCLLG                                  |
| 2P7V           | KALDDFCQSLVDYLSAGHFSIYERILH                   |
| 2P7V           | RERIRQIEAKALRKL                               |
| 2PBD           | LAAAIAAG                                      |
| 2PBI           | DAAQTHIYMLMKDSYARYLK                          |
| 2PBI           | ETLASLKSEAESLKGKLEEERAKL                      |
| 2PBI           | AFLQKIEALVKDMQ                                |
| 2PBI           | GGDVLQWITQRLW                                 |
| 2PBI           | NLEAQLNGNFIVKY                                |
| 2PBI           | SSVSLGGIVKYSEQF                               |
| 2PBI           | LASLKSEAESLKGKLEEERAKL                        |
| 2PG1           | EKDIAAYIKKEFDKKY                              |
| 2PHG           | QMFTDALGI                                     |
| 2PJW           | KTTIDQLHNSLNAAS                               |
| 2PJW           | KLQNLQQRVFASKARLNYALNDKAQKYNTLIE              |
| 2PK9           | STAIREISLMKE                                  |
| 2PL9           | KENIIAAAQA                                    |
| 2PL9           | QDQVDDLDSL                                    |
| 2PMS           | LQSKLDAKAKLSKLEELSDKIDELDAEIAKLEDQLKA         |
| 2PMS           | PQAKIAELENQVHRLEQEL                           |
| 2PO6           | EAEISHT                                       |
| 2PON           | AYQSFEQVVNELF                                 |
| 2PQ4           | RRSFMKANAVAAAAAAA                             |
| 2PQR           | IQRFNAYAWGLIKS                                |
| 2PQR           | RRECLYLTIGCYKL                                |
| 2PQR           | VNDERLGVKILTDIYKEA                            |
| 2PRG           | KILHRLLEQE                                    |
| 2PSM           | KVTAMNCFLELQVILHEY                            |
| 2Q00           | PREMLCLVWASK                                  |
| 2Q00           | GPVLQTLQDEYVARQKRSEAQQEELSDILDALG             |
| 2Q86           | KAEIANKQ                                      |
| 2Q97           | PEQAKAALLDEILRA                               |
| 2Q97           | TEQQKAYEQVQRDLSQL                             |
| 2QCS           | ELALIY                                        |
| 2QFA           | LRRRKLASFLKDFDREVEIRIKQIESDRQNLKVEDNLYNIEILRL |
| 2QFA           | LGEFLKLDREKAKNIAKETNNKKKEFEETAKKVRRAIEQLAA    |

| A. PDB<br>CODE | M. RESOLUTION |
|----------------|---------------|
| 2P1L           | 2.5           |
| 2P1L           | 2.5           |
| 2P1L           | 2.5           |
| 2P1L           | 2.5           |
| 2P1L           | 2.5           |
| 2P1N           | 2.5           |
| 2P1N           | 2.5           |
| 2P1N           | 2.5           |
| 2P1N           | 2.5           |
| 2P22           | 2.7           |
| 2P22           | 2.7           |
| 2P22           | 2.7           |
| 2P22           | 2.7           |
| 2P22           | 2.7           |
| 2P22           | 2.7           |
| 2P22           | 2.7           |
| 2P22           | 2.7           |
| 2P22           | 2.7           |
| 2P22           | 2.7           |
| 2P22           | 2.7           |
| 2P22           | 2.7           |
| 2P22           | 2.7           |
| 2P22           | 2.7           |
| 2P5T           | 3.2           |
| 2P5T           | 3.2           |
| 2P5T           | 3.2           |
| 2P5T           | 3.2           |
| 2P5T           | 3.2           |
| 2P5T           | 3.2           |
| 2P6A           | 3.4           |
| 2P6A           | 3.4           |
| 2P7V           | 2.6           |
| 2P7V           | 2.6           |
| 2PBD           | 1.5           |
| 2PBI           | 1.95          |
| 2PBI           | 1.95          |
| 2PBI           | 1.95          |
| 2PBI           | 1.95          |
| 2PBI           | 1.95          |
| 2PBI           | 1.95          |
| 2PBI           | 1.95          |
| 2PG1           | 2.8           |
| 2PHG           | NOT APP       |
| 2PJW           | 3.01          |
| 2PJW           | 3.01          |
| 2PK9           | 2.91          |
| 2PL9           | 2.6           |
| 2PL9           | 2.6           |
| 2PMS           | 2.91          |
| 2PMS           | 2.91          |
| 2PO6           | 3.2           |
| 2PON           | NOT APP       |
| 2PQ4           | NOT APP       |
| 2PQR           | 1.88          |
| 2PQR           | 1.88          |
| 2PQR           | 1.88          |
| 2PRG           | 2.3           |
| 2PSM           | 2.19          |
| 2Q00           | 2             |
| 2Q00           | 2             |
| 2Q86           | 1.85          |
| 2Q97           | 2.5           |
| 2Q97           | 2.5           |
| 2QCS           | 2.2           |
| 2QFA           | 1.4           |
| 2QFA           | 1.4           |

| A. PDB CODE | B. INTERFACE CHAINS | C. CHAIN | D. TITLE                                                                                  |
|-------------|---------------------|----------|-------------------------------------------------------------------------------------------|
| 2QFA        | A C                 | C        | CRYSTAL STRUCTURE OF A SURVIVIN-BOREALIN-INCENP CORE COMPLEX                              |
| 2QFA        | B C                 | B        | CRYSTAL STRUCTURE OF A SURVIVIN-BOREALIN-INCENP CORE COMPLEX                              |
| 2QKH        | B A                 | A        | CRYSTAL STRUCTURE OF THE EXTRACELLULAR DOMAIN OF HUMAN GIP RECEPTOR IN COMPLEX WITH       |
| 2QKH        | B A                 | B        | CRYSTAL STRUCTURE OF THE EXTRACELLULAR DOMAIN OF HUMAN GIP RECEPTOR IN COMPLEX WITH       |
| 2QL2        | A B                 | A        | CRYSTAL STRUCTURE OF THE BASIC-HELIX-LOOP-HELIX DOMAINS OF THE HETERODIMER E47/NEUROI     |
| 2QL2        | A B                 | A        | CRYSTAL STRUCTURE OF THE BASIC-HELIX-LOOP-HELIX DOMAINS OF THE HETERODIMER E47/NEUROI     |
| 2QL2        | C D                 | C        | CRYSTAL STRUCTURE OF THE BASIC-HELIX-LOOP-HELIX DOMAINS OF THE HETERODIMER E47/NEUROI     |
| 2QL2        | C D                 | D        | CRYSTAL STRUCTURE OF THE BASIC-HELIX-LOOP-HELIX DOMAINS OF THE HETERODIMER E47/NEUROI     |
| 2QL2        | C D                 | D        | CRYSTAL STRUCTURE OF THE BASIC-HELIX-LOOP-HELIX DOMAINS OF THE HETERODIMER E47/NEUROI     |
| 2QL5        | A B                 | A        | CRYSTAL STRUCTURE OF CASPASE-7 WITH INHIBITOR AC-DMQD-CHO                                 |
| 2QL5        | A B                 | B        | CRYSTAL STRUCTURE OF CASPASE-7 WITH INHIBITOR AC-DMQD-CHO                                 |
| 2QL5        | C D                 | D        | CRYSTAL STRUCTURE OF CASPASE-7 WITH INHIBITOR AC-DMQD-CHO                                 |
| 2QLV        | A B                 | A        | CRYSTAL STRUCTURE OF THE HETEROTRIMER CORE OF THE S. CEREVISIAE AMPK HOMOLOG SNF1         |
| 2QLV        | A C                 | A        | CRYSTAL STRUCTURE OF THE HETEROTRIMER CORE OF THE S. CEREVISIAE AMPK HOMOLOG SNF1         |
| 2QLV        | D E                 | D        | CRYSTAL STRUCTURE OF THE HETEROTRIMER CORE OF THE S. CEREVISIAE AMPK HOMOLOG SNF1         |
| 2QNA        | A B                 | B        | CRYSTAL STRUCTURE OF HUMAN IMPORTIN-BETA (127-876) IN COMPLEX WITH THE IBB-DOMAIN OF SNF1 |
| 2QR1        | C D                 | C        | CRYSTAL STRUCTURE OF THE ADENYLATE SENSOR FROM AMP- ACTIVATED PROTEIN KINASE IN COMPI     |
| 2QR1        | C D                 | C        | CRYSTAL STRUCTURE OF THE ADENYLATE SENSOR FROM AMP- ACTIVATED PROTEIN KINASE IN COMPI     |
| 2QR1        | C D                 | D        | CRYSTAL STRUCTURE OF THE ADENYLATE SENSOR FROM AMP- ACTIVATED PROTEIN KINASE IN COMPI     |
| 2QSH        | A X                 | A        | CRYSTAL STRUCTURE OF RAD4-RAD23 BOUND TO A MISMATCH DNA                                   |
| 2QSH        | A X                 | X        | CRYSTAL STRUCTURE OF RAD4-RAD23 BOUND TO A MISMATCH DNA                                   |
| 2QSH        | A X                 | X        | CRYSTAL STRUCTURE OF RAD4-RAD23 BOUND TO A MISMATCH DNA                                   |
| 2QSH        | A X                 | X        | CRYSTAL STRUCTURE OF RAD4-RAD23 BOUND TO A MISMATCH DNA                                   |
| 2QTV        | A B                 | B        | STRUCTURE OF SEC23-SAR1 COMPLEXED WITH THE ACTIVE FRAGMENT OF SEC31                       |
| 2QYF        | A B                 | A        | CRYSTAL STRUCTURE OF THE MAD2/P31(COMET)/MAD2-BINDING PEPTIDE TERNARY COMPLEX             |
| 2QYF        | A B                 | B        | CRYSTAL STRUCTURE OF THE MAD2/P31(COMET)/MAD2-BINDING PEPTIDE TERNARY COMPLEX             |
| 2QYF        | C D                 | D        | CRYSTAL STRUCTURE OF THE MAD2/P31(COMET)/MAD2-BINDING PEPTIDE TERNARY COMPLEX             |
| 2R17        | A C                 | C        | FUNCTIONAL ARCHITECTURE OF THE RETROMER CARGO-RECOGNITION COMPLEX                         |
| 2RAW        | A B                 | A        | CRYSTAL STRUCTURE OF THE BOREALIN-SURVIVIN COMPLEX                                        |
| 2RAX        | A B                 | B        | CRYSTAL STRUCTURE OF BOREALIN (20-78) BOUND TO SURVIVIN (1- 120)                          |
| 2RAX        | E F                 | F        | CRYSTAL STRUCTURE OF BOREALIN (20-78) BOUND TO SURVIVIN (1- 120)                          |
| 2RAX        | X Y                 | X        | CRYSTAL STRUCTURE OF BOREALIN (20-78) BOUND TO SURVIVIN (1- 120)                          |
| 2RAX        | X Y                 | Y        | CRYSTAL STRUCTURE OF BOREALIN (20-78) BOUND TO SURVIVIN (1- 120)                          |
| 2RAX        | X Y                 | Y        | CRYSTAL STRUCTURE OF BOREALIN (20-78) BOUND TO SURVIVIN (1- 120)                          |
| 2RD0        | A B                 | B        | STRUCTURE OF A HUMAN P110ALPHA/P85ALPHA COMPLEX                                           |
| 2REX        | C D                 | D        | CRYSTAL STRUCTURE OF THE EFFECTOR DOMAIN OF PLXNB1 BOUND WITH RND1 GTPASE                 |
| 2RGN        | A B                 | A        | CRYSTAL STRUCTURE OF P63RHOGEF COMPLEX WITH GALPHA-Q AND RHOA                             |
| 2RGN        | A B                 | B        | CRYSTAL STRUCTURE OF P63RHOGEF COMPLEX WITH GALPHA-Q AND RHOA                             |
| 2RGN        | A B                 | B        | CRYSTAL STRUCTURE OF P63RHOGEF COMPLEX WITH GALPHA-Q AND RHOA                             |
| 2RGN        | D E                 | E        | CRYSTAL STRUCTURE OF P63RHOGEF COMPLEX WITH GALPHA-Q AND RHOA                             |
| 2RGN        | D E                 | E        | CRYSTAL STRUCTURE OF P63RHOGEF COMPLEX WITH GALPHA-Q AND RHOA                             |
| 2RMK        | A B                 | B        | RAC1/PRK1 COMPLEX                                                                         |
| 2RMS        | A B                 | A        | SOLUTION STRUCTURE OF THE MSIN3A PAH1-SAP25 SID COMPLEX                                   |
| 2ROC        | A B                 | A        | SOLUTION STRUCTURE OF MCL-1 COMPLEXED WITH PUMA                                           |
| 2ROC        | A B                 | A        | SOLUTION STRUCTURE OF MCL-1 COMPLEXED WITH PUMA                                           |
| 2ROD        | A B                 | A        | SOLUTION STRUCTURE OF MCL-1 COMPLEXED WITH NOXAA                                          |
| 2ROD        | A B                 | A        | SOLUTION STRUCTURE OF MCL-1 COMPLEXED WITH NOXAA                                          |
| 2SIV        | A B                 | B        | SIV GP41 CORE STRUCTURE                                                                   |
| 2SIV        | C B                 | C        | SIV GP41 CORE STRUCTURE                                                                   |
| 2SIV        | E D                 | E        | SIV GP41 CORE STRUCTURE                                                                   |
| 2SIV        | E F                 | E        | SIV GP41 CORE STRUCTURE                                                                   |
| 2UXN        | A B                 | A        | STRUCTURAL BASIS OF HISTONE DEMETHYLATION BY LSD1 REVEALED BY SUICIDE INACTIVATION        |
| 2UXN        | A B                 | B        | STRUCTURAL BASIS OF HISTONE DEMETHYLATION BY LSD1 REVEALED BY SUICIDE INACTIVATION        |
| 2UXN        | A B                 | B        | STRUCTURAL BASIS OF HISTONE DEMETHYLATION BY LSD1 REVEALED BY SUICIDE INACTIVATION        |
| 2UXN        | A B                 | B        | STRUCTURAL BASIS OF HISTONE DEMETHYLATION BY LSD1 REVEALED BY SUICIDE INACTIVATION        |
| 2UY1        | A B                 | A        | CRYSTAL STRUCTURE OF CSTF-77                                                              |
| 2UY1        | A B                 | A        | CRYSTAL STRUCTURE OF CSTF-77                                                              |
| 2UY1        | A B                 | B        | CRYSTAL STRUCTURE OF CSTF-77                                                              |
| 2UY1        | A B                 | B        | CRYSTAL STRUCTURE OF CSTF-77                                                              |
| 2UY1        | A B                 | B        | CRYSTAL STRUCTURE OF CSTF-77                                                              |
| 2UZ6        | A K                 | K        | ACHBP-TARGETED A-CONOTOXIN CORRELATES DISTINCT BINDING ORIENTATIONS WITH NACHR SUBTY      |
| 2VID        | A B                 | A        | STRUCTURAL BASIS OF LSD1-COREST SELECTIVITY IN HISTONE H3 RECOGNITION                     |
| 2VID        | A B                 | B        | STRUCTURAL BASIS OF LSD1-COREST SELECTIVITY IN HISTONE H3 RECOGNITION                     |

TABLE S4

Jochim, et al

| A. PDB<br>CODE | E. FUNCTION                            | F. $\Delta\Delta G_{\text{AVG,HELIX}}$<br>(KCAL/MOL) | G. $\Delta\Delta G_{\text{SUM,HELIX}}$<br>(KCAL/MOL) | H. # HOTSPOT<br>RESIDUES | I. HELIX<br>LENGTH |
|----------------|----------------------------------------|------------------------------------------------------|------------------------------------------------------|--------------------------|--------------------|
| 2QFA           | CELL CYCLE/CELL CYCLE/CELL CYCLE       | 1.8                                                  | 14.0                                                 | 8                        | 39                 |
| 2QFA           | CELL CYCLE/CELL CYCLE/CELL CYCLE       | 1.8                                                  | 8.8                                                  | 5                        | 46                 |
| 2QKH           | SIGNALING PROTEIN/HORMONE              | 1.6                                                  | 3.1                                                  | 2                        | 22                 |
| 2QKH           | SIGNALING PROTEIN/HORMONE              | 1.7                                                  | 8.3                                                  | 5                        | 27                 |
| 2QL2           | TRANSCRIPTION/DNA                      | 1.6                                                  | 8.1                                                  | 5                        | 19                 |
| 2QL2           | TRANSCRIPTION/DNA                      | 1.7                                                  | 6.9                                                  | 4                        | 28                 |
| 2QL2           | TRANSCRIPTION/DNA                      | 1.9                                                  | 7.5                                                  | 4                        | 21                 |
| 2QL2           | TRANSCRIPTION/DNA                      | 1.7                                                  | 13.8                                                 | 8                        | 20                 |
| 2QL2           | TRANSCRIPTION/DNA                      | 1.5                                                  | 2.9                                                  | 2                        | 25                 |
| 2QL5           | HYDROLASE                              | 1.7                                                  | 5.2                                                  | 3                        | 16                 |
| 2QL5           | HYDROLASE                              | 1.3                                                  | 4.0                                                  | 3                        | 11                 |
| 2QL5           | HYDROLASE                              | 1.2                                                  | 2.4                                                  | 2                        | 13                 |
| 2QLV           | TRANSFERASE/PROTEIN BINDING            | 1.5                                                  | 3.0                                                  | 2                        | 19                 |
| 2QLV           | TRANSFERASE/PROTEIN BINDING            | 1.2                                                  | 2.4                                                  | 2                        | 12                 |
| 2QLV           | TRANSFERASE/PROTEIN BINDING            | 1.2                                                  | 3.5                                                  | 3                        | 19                 |
| 2QNA           | TRANSPORT PROTEIN                      | 1.8                                                  | 8.8                                                  | 5                        | 27                 |
| 2QR1           | TRANSFERASE                            | 1.5                                                  | 2.9                                                  | 2                        | 15                 |
| 2QR1           | TRANSFERASE                            | 1.6                                                  | 3.2                                                  | 2                        | 14                 |
| 2QR1           | TRANSFERASE                            | 1.9                                                  | 3.8                                                  | 2                        | 6                  |
| 2QSH           | DNA BINDING PROTEIN/DNA                | 1.4                                                  | 8.1                                                  | 6                        | 30                 |
| 2QSH           | DNA BINDING PROTEIN/DNA                | 1.3                                                  | 2.5                                                  | 2                        | 11                 |
| 2QSH           | DNA BINDING PROTEIN/DNA                | 1.2                                                  | 3.6                                                  | 3                        | 10                 |
| 2QSH           | DNA BINDING PROTEIN/DNA                | 1.7                                                  | 3.4                                                  | 2                        | 10                 |
| 2QTV           | PROTEIN TRANSPORT                      | 1.2                                                  | 2.4                                                  | 2                        | 10                 |
| 2QYF           | CELL CYCLE                             | 1.9                                                  | 3.7                                                  | 2                        | 22                 |
| 2QYF           | CELL CYCLE                             | 1.1                                                  | 2.1                                                  | 2                        | 13                 |
| 2QYF           | CELL CYCLE                             | 1.5                                                  | 2.9                                                  | 2                        | 14                 |
| 2R17           | PROTEIN TRANSPORT                      | 1.8                                                  | 3.5                                                  | 2                        | 20                 |
| 2RAW           | CELL CYCLE                             | 1.9                                                  | 15.3                                                 | 8                        | 43                 |
| 2RAX           | CELL CYCLE                             | 1.9                                                  | 9.4                                                  | 5                        | 39                 |
| 2RAX           | CELL CYCLE                             | 1.5                                                  | 5.8                                                  | 4                        | 38                 |
| 2RAX           | CELL CYCLE                             | 1.7                                                  | 5.2                                                  | 3                        | 19                 |
| 2RAX           | CELL CYCLE                             | 1.4                                                  | 4.2                                                  | 3                        | 38                 |
| 2RAX           | CELL CYCLE                             | 1.5                                                  | 3.0                                                  | 2                        | 5                  |
| 2RD0           | TRANSFERASE/ONCOPROTEIN                | 1.4                                                  | 4.2                                                  | 3                        | 50                 |
| 2REX           | SIGNALING PROTEIN/LIPOPROTEIN          | 1.1                                                  | 2.1                                                  | 2                        | 9                  |
| 2RGN           | SIGNALING PROTEIN COMPLEX              | 1.3                                                  | 2.5                                                  | 2                        | 10                 |
| 2RGN           | SIGNALING PROTEIN COMPLEX              | 1.3                                                  | 2.6                                                  | 2                        | 10                 |
| 2RGN           | SIGNALING PROTEIN COMPLEX              | 1.8                                                  | 5.5                                                  | 3                        | 26                 |
| 2RGN           | SIGNALING PROTEIN COMPLEX              | 1.7                                                  | 5.1                                                  | 3                        | 7                  |
| 2RGN           | SIGNALING PROTEIN COMPLEX              | 1.2                                                  | 2.4                                                  | 2                        | 13                 |
| 2RMK           | MEMBRANE PROTEIN/TRANSFERASE           | 1.3                                                  | 2.5                                                  | 2                        | 34                 |
| 2RMS           | TRANSCRIPTION                          | 1.1                                                  | 2.1                                                  | 2                        | 16                 |
| 2ROC           | APOPTOSIS                              | 1.1                                                  | 2.1                                                  | 2                        | 15                 |
| 2ROC           | APOPTOSIS                              | 1.8                                                  | 3.6                                                  | 2                        | 21                 |
| 2ROD           | APOPTOSIS                              | 1.2                                                  | 2.4                                                  | 2                        | 11                 |
| 2ROD           | APOPTOSIS                              | 1.7                                                  | 3.3                                                  | 2                        | 21                 |
| 2SIV           | ENVELOPE GLYCOPROTEIN                  | 1.3                                                  | 3.8                                                  | 3                        | 33                 |
| 2SIV           | ENVELOPE GLYCOPROTEIN                  | 1.4                                                  | 4.2                                                  | 3                        | 35                 |
| 2SIV           | ENVELOPE GLYCOPROTEIN                  | 1.2                                                  | 4.7                                                  | 4                        | 35                 |
| 2SIV           | ENVELOPE GLYCOPROTEIN                  | 1.5                                                  | 4.5                                                  | 3                        | 35                 |
| 2UXN           | OXIDOREDUCTASE/TRANSCRIPTION REGULATOR | 1.4                                                  | 14.1                                                 | 10                       | 61                 |
| 2UXN           | OXIDOREDUCTASE/TRANSCRIPTION REGULATOR | 1.2                                                  | 4.7                                                  | 4                        | 34                 |
| 2UXN           | OXIDOREDUCTASE/TRANSCRIPTION REGULATOR | 1.2                                                  | 2.4                                                  | 2                        | 8                  |
| 2UXN           | OXIDOREDUCTASE/TRANSCRIPTION REGULATOR | 1.9                                                  | 3.8                                                  | 2                        | 15                 |
| 2UY1           | RNA-BINDING PROTEIN                    | 1.3                                                  | 3.9                                                  | 3                        | 17                 |
| 2UY1           | RNA-BINDING PROTEIN                    | 1.3                                                  | 2.5                                                  | 2                        | 16                 |
| 2UY1           | RNA-BINDING PROTEIN                    | 1.1                                                  | 2.1                                                  | 2                        | 13                 |
| 2UY1           | RNA-BINDING PROTEIN                    | 1.5                                                  | 2.9                                                  | 2                        | 17                 |
| 2UY1           | RNA-BINDING PROTEIN                    | 1.7                                                  | 3.4                                                  | 2                        | 14                 |
| 2UZ6           | RECEPTOR                               | 1.1                                                  | 3.4                                                  | 3                        | 7                  |
| 2VID           | OXIDOREDUCTASE/REPRESSOR               | 1.3                                                  | 10.5                                                 | 8                        | 59                 |
| 2VID           | OXIDOREDUCTASE/REPRESSOR               | 1.2                                                  | 3.5                                                  | 3                        | 34                 |



TABLE S4

Jochim, et al

| A. PDB<br>CODE | J. HELIX START<br>RESIDUE # | K. HELIX END<br>RESIDUE # |
|----------------|-----------------------------|---------------------------|
| 2QFA           | 8                           | 46                        |
| 2QFA           | 16                          | 61                        |
| 2QKH           | 32                          | 53                        |
| 2QKH           | 6                           | 32                        |
| 2QL2           | 581                         | 599                       |
| 2QL2           | 544                         | 571                       |
| 2QL2           | 581                         | 601                       |
| 2QL2           | 139                         | 158                       |
| 2QL2           | 103                         | 127                       |
| 2QL5           | 90                          | 105                       |
| 2QL5           | 240                         | 250                       |
| 2QL5           | 540                         | 552                       |
| 2QLV           | 612                         | 630                       |
| 2QLV           | 475                         | 486                       |
| 2QLV           | 612                         | 630                       |
| 2QNA           | 38                          | 64                        |
| 2QR1           | 462                         | 476                       |
| 2QR1           | 562                         | 575                       |
| 2QR1           | 214                         | 219                       |
| 2QSH           | 134                         | 163                       |
| 2QSH           | 276                         | 286                       |
| 2QSH           | 298                         | 307                       |
| 2QSH           | 288                         | 297                       |
| 2QTV           | 78                          | 87                        |
| 2QYF           | 121                         | 142                       |
| 2QYF           | 183                         | 195                       |
| 2QYF           | 182                         | 195                       |
| 2R17           | 713                         | 732                       |
| 2RAW           | 98                          | 140                       |
| 2RAX           | 23                          | 61                        |
| 2RAX           | 24                          | 61                        |
| 2RAX           | 98                          | 116                       |
| 2RAX           | 24                          | 61                        |
| 2RAX           | 70                          | 74                        |
| 2RD0           | 450                         | 499                       |
| 2REX           | 75                          | 83                        |
| 2RGN           | 210                         | 219                       |
| 2RGN           | 210                         | 219                       |
| 2RGN           | 451                         | 476                       |
| 2RGN           | 470                         | 476                       |
| 2RGN           | 478                         | 490                       |
| 2RMK           | 160                         | 193                       |
| 2RMS           | 142                         | 157                       |
| 2ROC           | 221                         | 235                       |
| 2ROC           | 242                         | 262                       |
| 2ROD           | 206                         | 216                       |
| 2ROD           | 242                         | 262                       |
| 2SIV           | 629                         | 661                       |
| 2SIV           | 547                         | 581                       |
| 2SIV           | 547                         | 581                       |
| 2SIV           | 547                         | 581                       |
| 2UXN           | 408                         | 468                       |
| 2UXN           | 330                         | 363                       |
| 2UXN           | 318                         | 325                       |
| 2UXN           | 385                         | 399                       |
| 2UY1           | 400                         | 416                       |
| 2UY1           | 319                         | 334                       |
| 2UY1           | 435                         | 447                       |
| 2UY1           | 400                         | 416                       |
| 2UY1           | 384                         | 397                       |
| 2UZ6           | 6                           | 12                        |
| 2VID           | 408                         | 466                       |
| 2VID           | 330                         | 363                       |

| A. PDB<br>CODE | L. HELIX SEQUENCE                                           |
|----------------|-------------------------------------------------------------|
| 2QFA           | PIHLLLELCDQKLMFLCNMDNKDLVWLEEIQEEAERMFT                     |
| 2QFA           | LRRRKLASFLKDFDREVEIRIKQIESDRQNLLKEVDNLYNIEILRL              |
| 2QKH           | AGELYQRWERYRRECQETLAAA                                      |
| 2QKH           | FISDYSIAMDKIHQQDFVNWLLAQKGG                                 |
| 2QL2           | KLLILQQAVQVILGLEQQV                                         |
| 2QL2           | RMANNARERVRVDINEAFRELGRMCQL                                 |
| 2QL2           | KLLILQQAVQVILGLEQQVRE                                       |
| 2QL2           | KIETLRLAKNYIWALSEILR                                        |
| 2QL2           | RMKANARERNRMHGLNAALDNLKRV                                   |
| 2QL5           | TDKDAEALFKCFRSLG                                            |
| 2QL5           | WVQALCSILE                                                  |
| 2QL5           | WVQALCSILEEH                                                |
| 2QLV           | AYPFLHLTTKLIMELAVNS                                         |
| 2QLV           | PQIHRANMLAQG                                                |
| 2QLV           | AYPFLHLTTKLIMELAVNS                                         |
| 2QNA           | LEQSERRRRLLELQKSKRLDYVNHARR                                 |
| 2QR1           | APELLAVYRALQRA                                              |
| 2QR1           | FLDLCAMLVCKLFS                                              |
| 2QR1           | AFLTSN                                                      |
| 2QSH           | NEERKRRKYFHMLYLVCLMVHGFIRNEWIN                              |
| 2QSH           | LAPLENISAR                                                  |
| 2QSH           | PEVFSMLLE                                                   |
| 2QSH           | PQLREHIMAN                                                  |
| 2QTV           | IQARRLWKDY                                                  |
| 2QYF           | QKAIQDEIRS VIRQITATVTFI                                     |
| 2QYF           | TAACLRRLFRAIF                                               |
| 2QYF           | STAACLRRLFRAIF                                              |
| 2R17           | PSLQVQLFIEILNRYTYFYE                                        |
| 2RAW           | LGEFLKDRERAKNKIAKETNNKKKEFEETAKKVRRAIEQLAA                  |
| 2RAX           | SFLKDFDREVEIRIKQIESDRQNLLKEVDNLYNIEILRL                     |
| 2RAX           | FLKDFDREVEIRIKQIESDRQNLLKEVDNLYNIEILRL                      |
| 2RAX           | LGEFLKDRERAKNKIAKE                                          |
| 2RAX           | FLKDFDREVEIRIKQIESDRQNLLKEVDNLYNIEILRL                      |
| 2RAX           | WLDYF                                                       |
| 2RD0           | HEYNTQFQEKREYDRLYEYTRTSQEIQMKRTAIEAFNETIKIFEEQCQ            |
| 2REX           | DNVRPLCYS                                                   |
| 2RGN           | RSERRKWIHC                                                  |
| 2RGN           | IQQIYEWHRD                                                  |
| 2RGN           | PAISQAWIKHVAQILESQRDFLNALQ                                  |
| 2RGN           | DFLNALQ                                                     |
| 2RGN           | PIEQRRRESQTNS                                               |
| 2RMK           | RKLLLLTAQQMLQDSKTKIDIIRMQLRRALQADQL                         |
| 2RMS           | QVYNDFLDIMKEFKSQ                                            |
| 2ROC           | EGDVKSFSRVMVHVF                                             |
| 2ROC           | WGRIVTLISFGAFVAKHLKSV                                       |
| 2ROD           | ETAFQGMLRKL                                                 |
| 2ROD           | WGRIVTLISFGAFVAKHLKSV                                       |
| 2SIV           | QEWERKVDLEENITALLEEAQIQEKNMYELQ                             |
| 2SIV           | GIVQQQQQLLDVVKRQEQELLRLTVWGTKNLQTRVT                        |
| 2SIV           | GIVQQQQQLLDVVKRQEQELLRLTVWGTKNLQTRVT                        |
| 2SIV           | GIVQQQQQLLDVVKRQEQELLRLTVWGTKNLQTRVT                        |
| 2UXN           | LGQALEVVIQLQEKHVKDEQIEHWKIVKTQEELKELLNKMNVLKEKIKELHQYKEASEV |
| 2UXN           | AATTVLRQLDMELSVKQRQIQNIKQTNLSALKEKL                         |
| 2UXN           | QEDVEAVS                                                    |
| 2UXN           | TEEQLLAVQAIRKYG                                             |
| 2UY1           | MELFRELVDQKMDAIIKA                                          |
| 2UY1           | PHVFIYCAFIEYYATG                                            |
| 2UY1           | ILGRYHCFLDSFN                                               |
| 2UY1           | MELFRELVDQKMDAIIKA                                          |
| 2UY1           | SRMWDSMIEYEFMV                                              |
| 2UZ6           | PPCILNN                                                     |
| 2VID           | LGQALEVVIQLQEKHVKDEQIEHWKIVKTQEELKELLNKMNVLKEKIKELHQYKEAS   |
| 2VID           | AATTVLRQLDMELSVKQRQIQNIKQTNLSALKEKL                         |

| A. PDB<br>CODE | M. RESOLUTION |
|----------------|---------------|
| 2QFA           | 1.4           |
| 2QFA           | 1.4           |
| 2QKH           | 1.9           |
| 2QKH           | 1.9           |
| 2QL2           | 2.5           |
| 2QL2           | 2.5           |
| 2QL2           | 2.5           |
| 2QL2           | 2.5           |
| 2QL2           | 2.5           |
| 2QL5           | 2.34          |
| 2QL5           | 2.34          |
| 2QL5           | 2.34          |
| 2QLV           | 2.6           |
| 2QLV           | 2.6           |
| 2QLV           | 2.6           |
| 2QNA           | 2.84          |
| 2QR1           | 2.7           |
| 2QR1           | 2.7           |
| 2QR1           | 2.7           |
| 2QSH           | 2.81          |
| 2QSH           | 2.81          |
| 2QSH           | 2.81          |
| 2QSH           | 2.81          |
| 2QTV           | 2.5           |
| 2QYF           | 2.3           |
| 2QYF           | 2.3           |
| 2QYF           | 2.3           |
| 2R17           | 2.8           |
| 2RAW           | 2.4           |
| 2RAX           | 3.3           |
| 2RAX           | 3.3           |
| 2RAX           | 3.3           |
| 2RAX           | 3.3           |
| 2RAX           | 3.3           |
| 2RAX           | 3.3           |
| 2RD0           | 3.05          |
| 2REX           | 2.3           |
| 2RGN           | 3.5           |
| 2RGN           | 3.5           |
| 2RGN           | 3.5           |
| 2RGN           | 3.5           |
| 2RGN           | 3.5           |
| 2RGN           | 3.5           |
| 2RMK           | NOT APP       |
| 2RMS           | NOT APP       |
| 2ROC           | NOT APP       |
| 2ROC           | NOT APP       |
| 2ROD           | NOT APP       |
| 2ROD           | NOT APP       |
| 2SIV           | 2.2           |
| 2SIV           | 2.2           |
| 2SIV           | 2.2           |
| 2SIV           | 2.2           |
| 2UXN           | 2.72          |
| 2UXN           | 2.72          |
| 2UXN           | 2.72          |
| 2UXN           | 2.72          |
| 2UY1           | 2             |
| 2UY1           | 2             |
| 2UY1           | 2             |
| 2UY1           | 2             |
| 2UY1           | 2             |
| 2UZ6           | 2.4           |
| 2VID           | 3.1           |
| 2VID           | 3.1           |

| A. PDB CODE | B. INTERFACE CHAINS | C. CHAIN | D. TITLE                                                                               |
|-------------|---------------------|----------|----------------------------------------------------------------------------------------|
| 2VID        | A B                 | B        | STRUCTURAL BASIS OF LSD1-COREST SELECTIVITY IN HISTONE H3 RECOGNITION                  |
| 2VIS        | A K                 | A        | CRYSTAL STRUCTURE OF RAT TOM20-ALDH PRESEQUENCE COMPLEX                                |
| 2VIS        | A K                 | K        | CRYSTAL STRUCTURE OF RAT TOM20-ALDH PRESEQUENCE COMPLEX                                |
| 2VIS        | E J                 | J        | CRYSTAL STRUCTURE OF RAT TOM20-ALDH PRESEQUENCE COMPLEX                                |
| 2V4I        | A B                 | B        | STRUCTURE OF A NOVEL N-ACYL-ENZYME INTERMEDIATE OF AN N- TERMINAL NUCLEOPHILE (NTN) H' |
| 2V4I        | G F                 | F        | STRUCTURE OF A NOVEL N-ACYL-ENZYME INTERMEDIATE OF AN N- TERMINAL NUCLEOPHILE (NTN) H' |
| 2V4Z        | A B                 | A        | THE CRYSTAL STRUCTURE OF THE HUMAN G-PROTEIN SUBUNIT ALPHA ( GNAI3) IN COMPLEX WITH AN |
| 2V4Z        | A B                 | B        | THE CRYSTAL STRUCTURE OF THE HUMAN G-PROTEIN SUBUNIT ALPHA ( GNAI3) IN COMPLEX WITH AN |
| 2V5I        | B F                 | F        | STRUCTURE OF MAL-RPEL1 COMPLEXED TO ACTIN                                              |
| 2V6Q        | A B                 | A        | CRYSTAL STRUCTURE OF A BHRF-1 : BIM BH3 COMPLEX                                        |
| 2V6X        | A B                 | A        | STRUCTURAL INSIGHT INTO THE INTERACTION BETWEEN ESCRT-III AND VPS4                     |
| 2V6X        | A B                 | B        | STRUCTURAL INSIGHT INTO THE INTERACTION BETWEEN ESCRT-III AND VPS4                     |
| 2V8W        | A B                 | B        | CRYSTALLOGRAPHIC AND MASS SPECTROMETRIC CHARACTERISATION OF EIF4E WITH N7-CAP DERIVA   |
| 2VAS        | A B                 | B        | MYOSIN VI (MD-INSERT2-CAM, DELTA-INSERT1) POST-RIGOR STATE                             |
| 2VAS        | A B                 | B        | MYOSIN VI (MD-INSERT2-CAM, DELTA-INSERT1) POST-RIGOR STATE                             |
| 2VAS        | A B                 | B        | MYOSIN VI (MD-INSERT2-CAM, DELTA-INSERT1) POST-RIGOR STATE                             |
| 2VDA        | A B                 | B        | SOLUTION STRUCTURE OF THE SECA-SIGNAL PEPTIDE COMPLEX                                  |
| 2VE7        | A C                 | A        | CRYSTAL STRUCTURE OF A BONSAI VERSION OF THE HUMAN NDC80 COMPLEX                       |
| 2VE7        | A C                 | A        | CRYSTAL STRUCTURE OF A BONSAI VERSION OF THE HUMAN NDC80 COMPLEX                       |
| 2VE7        | A C                 | C        | CRYSTAL STRUCTURE OF A BONSAI VERSION OF THE HUMAN NDC80 COMPLEX                       |
| 2VE7        | B D                 | B        | CRYSTAL STRUCTURE OF A BONSAI VERSION OF THE HUMAN NDC80 COMPLEX                       |
| 2VGO        | A D                 | D        | CRYSTAL STRUCTURE OF AURORA B KINASE IN COMPLEX WITH REVERSINE INHIBITOR               |
| 2VOF        | A B                 | B        | STRUCTURE OF MOUSE A1 BOUND TO THE PUMA BH3-DOMAIN                                     |
| 2VOG        | A B                 | A        | STRUCTURE OF MOUSE A1 BOUND TO THE BMF BH3-DOMAIN                                      |
| 2VOG        | A B                 | A        | STRUCTURE OF MOUSE A1 BOUND TO THE BMF BH3-DOMAIN                                      |
| 2VOG        | A B                 | B        | STRUCTURE OF MOUSE A1 BOUND TO THE BMF BH3-DOMAIN                                      |
| 2VOH        | A B                 | A        | STRUCTURE OF MOUSE A1 BOUND TO THE BAK BH3-DOMAIN                                      |
| 2VOH        | A B                 | B        | STRUCTURE OF MOUSE A1 BOUND TO THE BAK BH3-DOMAIN                                      |
| 2VPD        | A B                 | B        | DECODING OF METHYLATED HISTONE H3 TAIL BY THE PYGO-BCL9 WNT SIGNALING COMPLEX          |
| 2VPE        | A B                 | A        | DECODING OF METHYLATED HISTONE H3 TAIL BY THE PYGO-BCL9 WNT SIGNALING COMPLEX          |
| 2VPE        | A B                 | B        | DECODING OF METHYLATED HISTONE H3 TAIL BY THE PYGO-BCL9 WNT SIGNALING COMPLEX          |
| 2VPE        | C D                 | C        | DECODING OF METHYLATED HISTONE H3 TAIL BY THE PYGO-BCL9 WNT SIGNALING COMPLEX          |
| 2VRC        | C D                 | C        | CRYSTAL STRUCTURE OF THE CITROBACTER SP. TRIPHENYLMETHANE REDUCTASE COMPLEXED WITH     |
| 2VRW        | A B                 | B        | CRITICAL STRUCTURAL ROLE FOR THE PH AND C1 DOMAINS OF THE VAV1 EXCHANGE FACTOR         |
| 2VRW        | A B                 | B        | CRITICAL STRUCTURAL ROLE FOR THE PH AND C1 DOMAINS OF THE VAV1 EXCHANGE FACTOR         |
| 2VRW        | A B                 | B        | CRITICAL STRUCTURAL ROLE FOR THE PH AND C1 DOMAINS OF THE VAV1 EXCHANGE FACTOR         |
| 2VTB        | A B                 | A        | STRUCTURE OF CRYPTOCHROME 3 - DNA COMPLEX                                              |
| 2VTB        | A B                 | B        | STRUCTURE OF CRYPTOCHROME 3 - DNA COMPLEX                                              |
| 2VUS        | E M                 | M        | CRYSTAL STRUCTURE OF UNLIGANDED NMRA-AREA ZINC FINGER COMPLEX                          |
| 2VZD        | A C                 | C        | CRYSTAL STRUCTURE OF THE C-TERMINAL CALPONIN HOMOLOGY DOMAIN OF ALPHA PARVIN IN COM    |
| 2VZD        | B D                 | B        | CRYSTAL STRUCTURE OF THE C-TERMINAL CALPONIN HOMOLOGY DOMAIN OF ALPHA PARVIN IN COM    |
| 2W2M        | P A                 | A        | WT PCSK9-DELTAC BOUND TO WT EGF-A OF LDLR                                              |
| 2W83        | A C                 | C        | CRYSTAL STRUCTURE OF THE ARF6 GTPASE IN COMPLEX WITH A SPECIFIC EFFECTOR, JIP4         |
| 2W83        | B D                 | B        | CRYSTAL STRUCTURE OF THE ARF6 GTPASE IN COMPLEX WITH A SPECIFIC EFFECTOR, JIP4         |
| 2WAX        | A B                 | A        | STRUCTURE OF THE HUMAN DDX6 C-TERMINAL DOMAIN IN COMPLEX WITH AN EDC3-FDF PEPTIDE      |
| 2WEL        | A D                 | A        | CRYSTAL STRUCTURE OF SU6656-BOUND CALCIUM/CALMODULIN- DEPENDENT PROTEIN KINASE II DEI  |
| 2WEL        | A D                 | D        | CRYSTAL STRUCTURE OF SU6656-BOUND CALCIUM/CALMODULIN- DEPENDENT PROTEIN KINASE II DEI  |
| 2WEL        | A D                 | D        | CRYSTAL STRUCTURE OF SU6656-BOUND CALCIUM/CALMODULIN- DEPENDENT PROTEIN KINASE II DEI  |
| 2WG3        | A C                 | C        | CRYSTAL STRUCTURE OF THE COMPLEX BETWEEN HUMAN HEDGEHOG- INTERACTING PROTEIN HIP AN    |
| 2WG3        | B D                 | D        | CRYSTAL STRUCTURE OF THE COMPLEX BETWEEN HUMAN HEDGEHOG- INTERACTING PROTEIN HIP AN    |
| 2WIN        | B Q                 | Q        | C3 CONVERTASE (C3BBB) STABILIZED BY SCIN                                               |
| 2WIN        | D P                 | P        | C3 CONVERTASE (C3BBB) STABILIZED BY SCIN                                               |
| 2WIN        | F M                 | M        | C3 CONVERTASE (C3BBB) STABILIZED BY SCIN                                               |
| 2WIN        | F P                 | P        | C3 CONVERTASE (C3BBB) STABILIZED BY SCIN                                               |
| 2WIN        | L N                 | N        | C3 CONVERTASE (C3BBB) STABILIZED BY SCIN                                               |
| 2WIU        | A B                 | B        | MERCURY-MODIFIED BACTERIAL PERSISTENCE REGULATOR HIPBA                                 |
| 2WME        | B C                 | B        | CRYSTALLOGRAPHIC STRUCTURE OF BETAIN ALDEHYDE DEHYDROGENASE FROM PSEUDOMONAS AI        |
| 2WME        | B C                 | C        | CRYSTALLOGRAPHIC STRUCTURE OF BETAIN ALDEHYDE DEHYDROGENASE FROM PSEUDOMONAS AI        |
| 2WME        | D C                 | C        | CRYSTALLOGRAPHIC STRUCTURE OF BETAIN ALDEHYDE DEHYDROGENASE FROM PSEUDOMONAS AI        |
| 2WME        | D C                 | D        | CRYSTALLOGRAPHIC STRUCTURE OF BETAIN ALDEHYDE DEHYDROGENASE FROM PSEUDOMONAS AI        |
| 2WME        | F E                 | E        | CRYSTALLOGRAPHIC STRUCTURE OF BETAIN ALDEHYDE DEHYDROGENASE FROM PSEUDOMONAS AI        |
| 2WME        | F E                 | F        | CRYSTALLOGRAPHIC STRUCTURE OF BETAIN ALDEHYDE DEHYDROGENASE FROM PSEUDOMONAS AI        |
| 2Z2S        | A B                 | A        | CRYSTAL STRUCTURE OF RHODOBACTER SPHAEROIDES SIGE IN COMPLEX WITH THE ANTI-SIGMA CHR   |

TABLE S4

Jochim, et al

| A. PDB<br>CODE | E. FUNCTION                            | F. $\Delta\Delta G_{\text{AVG,HELIX}}$<br>(KCAL/MOL) | G. $\Delta\Delta G_{\text{SUM,HELIX}}$<br>(KCAL/MOL) | H. # HOTSPOT<br>RESIDUES | I. HELIX<br>LENGTH |
|----------------|----------------------------------------|------------------------------------------------------|------------------------------------------------------|--------------------------|--------------------|
| 2V1D           | OXIDOREDUCTASE/REPRESSOR               | 1.3                                                  | 2.5                                                  | 2                        | 15                 |
| 2V1S           | OXIDOREDUCTASE                         | 1.6                                                  | 3.2                                                  | 2                        | 19                 |
| 2V1S           | OXIDOREDUCTASE                         | 1.9                                                  | 3.8                                                  | 2                        | 9                  |
| 2V1S           | OXIDOREDUCTASE                         | 1.8                                                  | 3.5                                                  | 2                        | 10                 |
| 2V4I           | TRANSFERASE                            | 1.9                                                  | 3.7                                                  | 2                        | 14                 |
| 2V4I           | TRANSFERASE                            | 1.3                                                  | 3.8                                                  | 3                        | 11                 |
| 2V4Z           | CELL CYCLE                             | 1.5                                                  | 3.0                                                  | 2                        | 10                 |
| 2V4Z           | CELL CYCLE                             | 1.3                                                  | 4.0                                                  | 3                        | 21                 |
| 2V51           | STRUCTURAL PROTEIN/CONTRACTILE PROTEIN | 1.6                                                  | 4.7                                                  | 3                        | 9                  |
| 2V6Q           | APOPTOSIS                              | 1.9                                                  | 3.8                                                  | 2                        | 21                 |
| 2V6X           | PROTEIN TRANSPORT                      | 1.5                                                  | 5.8                                                  | 4                        | 18                 |
| 2V6X           | PROTEIN TRANSPORT                      | 1.7                                                  | 6.6                                                  | 4                        | 12                 |
| 2V8W           | TRANSLATION                            | 1.3                                                  | 3.9                                                  | 3                        | 7                  |
| 2VAS           | MOTOR PROTEIN                          | 1.4                                                  | 4.3                                                  | 3                        | 11                 |
| 2VAS           | MOTOR PROTEIN                          | 1.8                                                  | 3.6                                                  | 2                        | 14                 |
| 2VAS           | MOTOR PROTEIN                          | 1.3                                                  | 2.5                                                  | 2                        | 11                 |
| 2VDA           | PROTEIN TRANSPORT                      | 1.5                                                  | 3.0                                                  | 2                        | 7                  |
| 2VE7           | CELL CYCLE                             | 1.9                                                  | 5.8                                                  | 3                        | 16                 |
| 2VE7           | CELL CYCLE                             | 1.6                                                  | 4.8                                                  | 3                        | 19                 |
| 2VE7           | CELL CYCLE                             | 1.7                                                  | 5.2                                                  | 3                        | 12                 |
| 2VE7           | CELL CYCLE                             | 1.6                                                  | 4.9                                                  | 3                        | 15                 |
| 2VGO           | TRANSFERASE                            | 1.5                                                  | 3.0                                                  | 2                        | 8                  |
| 2VOF           | APOPTOSIS                              | 1.9                                                  | 13.0                                                 | 7                        | 21                 |
| 2VOG           | APOPTOSIS                              | 1.4                                                  | 2.8                                                  | 2                        | 16                 |
| 2VOG           | APOPTOSIS                              | 1.3                                                  | 2.5                                                  | 2                        | 21                 |
| 2VOG           | APOPTOSIS                              | 1.9                                                  | 11.2                                                 | 6                        | 20                 |
| 2VOH           | APOPTOSIS                              | 1.1                                                  | 2.2                                                  | 2                        | 16                 |
| 2VOH           | APOPTOSIS                              | 1.8                                                  | 14.6                                                 | 8                        | 20                 |
| 2VPD           | GENE REGULATION                        | 1.7                                                  | 3.4                                                  | 2                        | 13                 |
| 2VPE           | GENE REGULATION                        | 1.6                                                  | 3.2                                                  | 2                        | 10                 |
| 2VPE           | GENE REGULATION                        | 1.5                                                  | 3.0                                                  | 2                        | 13                 |
| 2VPE           | GENE REGULATION                        | 1.5                                                  | 3.0                                                  | 2                        | 10                 |
| 2VRC           | OXIDOREDUCTASE                         | 1.9                                                  | 3.8                                                  | 2                        | 17                 |
| 2VRW           | SIGNALING PROTEIN                      | 1.3                                                  | 2.5                                                  | 2                        | 40                 |
| 2VRW           | SIGNALING PROTEIN                      | 1.9                                                  | 3.8                                                  | 2                        | 36                 |
| 2VRW           | SIGNALING PROTEIN                      | 1.4                                                  | 2.7                                                  | 2                        | 13                 |
| 2VTB           | LYASE/DNA                              | 1.7                                                  | 5.0                                                  | 3                        | 17                 |
| 2VTB           | LYASE/DNA                              | 1.8                                                  | 5.3                                                  | 3                        | 18                 |
| 2VUS           | TRANSCRIPTION                          | 1.5                                                  | 3.0                                                  | 2                        | 11                 |
| 2VZD           | CELL ADHESION                          | 1.3                                                  | 2.6                                                  | 2                        | 9                  |
| 2VZD           | CELL ADHESION                          | 1.8                                                  | 3.6                                                  | 2                        | 15                 |
| 2W2M           | HYDROLASE/RECEPTOR                     | 1.4                                                  | 2.8                                                  | 2                        | 18                 |
| 2W83           | PROTEIN TRANSPORT                      | 1.5                                                  | 2.9                                                  | 2                        | 64                 |
| 2W83           | PROTEIN TRANSPORT                      | 1.3                                                  | 2.6                                                  | 2                        | 7                  |
| 2WAX           | HYDROLASE                              | 1.9                                                  | 9.6                                                  | 5                        | 12                 |
| 2WEL           | TRANSFERASE                            | 1.7                                                  | 13.3                                                 | 8                        | 16                 |
| 2WEL           | TRANSFERASE                            | 1.3                                                  | 2.5                                                  | 2                        | 12                 |
| 2WEL           | TRANSFERASE                            | 1.3                                                  | 3.8                                                  | 3                        | 15                 |
| 2WG3           | SIGNALING PROTEIN                      | 1.4                                                  | 2.7                                                  | 2                        | 7                  |
| 2WG3           | SIGNALING PROTEIN                      | 1.1                                                  | 2.1                                                  | 2                        | 7                  |
| 2WIN           | IMMUNE SYSTEM                          | 1.8                                                  | 3.6                                                  | 2                        | 24                 |
| 2WIN           | IMMUNE SYSTEM                          | 1.8                                                  | 3.6                                                  | 2                        | 24                 |
| 2WIN           | IMMUNE SYSTEM                          | 1.9                                                  | 5.7                                                  | 3                        | 24                 |
| 2WIN           | IMMUNE SYSTEM                          | 1.4                                                  | 2.7                                                  | 2                        | 21                 |
| 2WIN           | IMMUNE SYSTEM                          | 1.6                                                  | 3.2                                                  | 2                        | 8                  |
| 2WIU           | TRANSFERASE/TRANSCRIPTION              | 1.6                                                  | 3.1                                                  | 2                        | 15                 |
| 2WME           | OXIDOREDUCTASE                         | 1.6                                                  | 3.2                                                  | 2                        | 18                 |
| 2WME           | OXIDOREDUCTASE                         | 1.2                                                  | 2.4                                                  | 2                        | 11                 |
| 2WME           | OXIDOREDUCTASE                         | 1.6                                                  | 3.2                                                  | 2                        | 11                 |
| 2WME           | OXIDOREDUCTASE                         | 1.6                                                  | 3.2                                                  | 2                        | 11                 |
| 2WME           | OXIDOREDUCTASE                         | 1.5                                                  | 3.0                                                  | 2                        | 10                 |
| 2WME           | OXIDOREDUCTASE                         | 1.2                                                  | 2.3                                                  | 2                        | 11                 |
| 2Z2S           | TRANSCRIPTION                          | 1.6                                                  | 3.2                                                  | 2                        | 11                 |

TABLE S4

Jochim, et al

| A. PDB<br>CODE | J. HELIX START<br>RESIDUE # | K. HELIX END<br>RESIDUE # |
|----------------|-----------------------------|---------------------------|
| 2VID           | 385                         | 399                       |
| 2VIS           | 65                          | 83                        |
| 2VIS           | 15                          | 23                        |
| 2VIS           | 14                          | 23                        |
| 2V4I           | 194                         | 207                       |
| 2V4I           | 303                         | 313                       |
| 2V4Z           | 205                         | 214                       |
| 2V4Z           | 171                         | 191                       |
| 2V5I           | 72                          | 80                        |
| 2V6Q           | 98                          | 118                       |
| 2V6X           | 6                           | 23                        |
| 2V6X           | 219                         | 230                       |
| 2V8W           | 56                          | 62                        |
| 2VAS           | 118                         | 128                       |
| 2VAS           | 80                          | 93                        |
| 2VAS           | 45                          | 55                        |
| 2VDA           | 13                          | 19                        |
| 2VE7           | 244                         | 259                       |
| 2VE7           | 222                         | 240                       |
| 2VE7           | 1182                        | 1193                      |
| 2VE7           | 244                         | 258                       |
| 2VGO           | 821                         | 828                       |
| 2VOF           | 132                         | 152                       |
| 2VOG           | 64                          | 79                        |
| 2VOG           | 86                          | 106                       |
| 2VOG           | 130                         | 149                       |
| 2VOH           | 64                          | 79                        |
| 2VOH           | 67                          | 86                        |
| 2VPD           | 182                         | 194                       |
| 2VPE           | 376                         | 385                       |
| 2VPE           | 182                         | 194                       |
| 2VPE           | 376                         | 385                       |
| 2VRC           | 116                         | 132                       |
| 2VRW           | 350                         | 389                       |
| 2VRW           | 191                         | 226                       |
| 2VRW           | 335                         | 347                       |
| 2VTB           | 147                         | 163                       |
| 2VTB           | 147                         | 164                       |
| 2VUS           | 695                         | 705                       |
| 2VZD           | 3                           | 11                        |
| 2VZD           | 354                         | 368                       |
| 2W2M           | 261                         | 278                       |
| 2W83           | 389                         | 452                       |
| 2W83           | 71                          | 77                        |
| 2WAX           | 432                         | 443                       |
| 2WEL           | 296                         | 311                       |
| 2WEL           | 119                         | 130                       |
| 2WEL           | 7                           | 21                        |
| 2WG3           | 376                         | 382                       |
| 2WG3           | 376                         | 382                       |
| 2WIN           | 60                          | 83                        |
| 2WIN           | 60                          | 83                        |
| 2WIN           | 60                          | 83                        |
| 2WIN           | 38                          | 58                        |
| 2WIN           | 26                          | 33                        |
| 2WIU           | 10                          | 24                        |
| 2WME           | 65                          | 82                        |
| 2WME           | 424                         | 434                       |
| 2WME           | 424                         | 434                       |
| 2WME           | 424                         | 434                       |
| 2WME           | 424                         | 433                       |
| 2WME           | 424                         | 434                       |
| 2Z2S           | 48                          | 58                        |

| A. PDB<br>CODE | L. HELIX SEQUENCE                                               |
|----------------|-----------------------------------------------------------------|
| 2V1D           | TEEQLLAVQAIRKYG                                                 |
| 2V1S           | AVQKFFLEEIQLGEELLAQ                                             |
| 2V1S           | LSRLLSYAG                                                       |
| 2V1S           | RLSRLLSYAG                                                      |
| 2V4I           | PAEQDRLFRRVMDR                                                  |
| 2V4I           | WGRVAMAIGKC                                                     |
| 2V4Z           | RSERKKWIHC                                                      |
| 2V4Z           | TTAQKRVYSLMENDSYPRFLK                                           |
| 2V51           | NVLQLKLQQ                                                       |
| 2V6Q           | LGRALAWMAWCMHACRTLCCN                                           |
| 2V6X           | FLTKGIELVQKAIDLDTA                                              |
| 2V6X           | DDLQARLNTLKK                                                    |
| 2V8W           | RKFLMEC                                                         |
| 2VAS           | DEEVDEMIREA                                                     |
| 2VAS           | DSEEEIREAFRVFD                                                  |
| 2VAS           | EAELQDMINEV                                                     |
| 2VDA           | LAVAVAA                                                         |
| 2VE7           | DEMNAELQSKLKDLFN                                                |
| 2VE7           | NKLFLDYTIKCYESFMSGA                                             |
| 2VE7           | RKFISDYLWSLV                                                    |
| 2VE7           | DEMNAELQSKLKDLF                                                 |
| 2VGO           | VDRMYGTI                                                        |
| 2VOF           | EWAREIGAQLRRIADDLNAQY                                           |
| 2VOG           | IDTARIIFNQVMEKEF                                                |
| 2VOG           | WGRIVTIFAFGGVLLKCLKQE                                           |
| 2VOG           | AEVQIARKLQCIADQFHRLH                                            |
| 2VOH           | IDTARIIFNQVMEKEF                                                |
| 2VOH           | ILGQVGRQLALIGDDINRRY                                            |
| 2VPD           | TEMANKAAEAVLK                                                   |
| 2VPE           | ETAYGLLTAE                                                      |
| 2VPE           | TEMANKAAEAVLK                                                   |
| 2VPE           | ETAYGLLTAE                                                      |
| 2VRC           | PLAHVHLATEYAIRTTN                                               |
| 2VRW           | ATEKENLRLALDAMRDLAQCVNEVKRDNETLRQITNFQLS                        |
| 2VRW           | EYDKRCCCLREIQQTEEKYTDTLGSIQQHFMKPLQR                            |
| 2VRW           | KYHLLLQELVKHT                                                   |
| 2VTB           | SEEVDVERLVNQGLKRV                                               |
| 2VTB           | SEEVDVERLVNQGLKRVG                                              |
| 2VUS           | NACGLFLKLHG                                                     |
| 2VZD           | DLDALLADL                                                       |
| 2VZD           | LKSTLRVLYNLFTKY                                                 |
| 2W2M           | VSGTLIGLEFIRKSQLVQ                                              |
| 2W83           | PEFMGREVENLILENTQLLETKNALNIVKNDLIAKVDELTCCKDVLQGELEAVKQAKLKLEEK |
| 2W83           | RPLWRHY                                                         |
| 2WAX           | RFNLKSIEEQLG                                                    |
| 2WEL           | ARRKLLKGAILTTMLAT                                               |
| 2WEL           | DEEVDEMIREAD                                                    |
| 2WEL           | EEQIAEFKEAFSLFD                                                 |
| 2WG3           | LDDMEEM                                                         |
| 2WG3           | LDDMEEM                                                         |
| 2WIN           | FKKMSEAKYQLQKIYNEIDEALKS                                        |
| 2WIN           | FKKMSEAKYQLQKIYNEIDEALKS                                        |
| 2WIN           | FKKMSEAKYQLQKIYNEIDEALKS                                        |
| 2WIN           | TYYKRTIKISGQKAMYALKSK                                           |
| 2WIN           | LNVNELAT                                                        |
| 2WIU           | PTQLANAMKLVRRQN                                                 |
| 2WME           | AMQRSRILRRAVDILRER                                              |
| 2WME           | LARAHRAIHRL                                                     |
| 2WME           | LARAHRAIHRL                                                     |
| 2WME           | LARAHRAIHRL                                                     |
| 2WME           | LARAHRAIHR                                                      |
| 2WME           | LARAHRAIHRL                                                     |
| 2Z2S           | ASQAEECAQDV                                                     |

| A. PDB<br>CODE | M. RESOLUTION |
|----------------|---------------|
| 2V1D           | 3.1           |
| 2V1S           | 2.05          |
| 2V1S           | 2.05          |
| 2V1S           | 2.05          |
| 2V4I           | 2.2           |
| 2V4I           | 2.2           |
| 2V4Z           | 2.8           |
| 2V4Z           | 2.8           |
| 2V51           | 2.35          |
| 2V6Q           | 2.7           |
| 2V6X           | 1.98          |
| 2V6X           | 1.98          |
| 2V8W           | 2.3           |
| 2VAS           | 2.4           |
| 2VAS           | 2.4           |
| 2VAS           | 2.4           |
| 2VDA           | NOT APP       |
| 2VE7           | 2.88          |
| 2VE7           | 2.88          |
| 2VE7           | 2.88          |
| 2VE7           | 2.88          |
| 2VGO           | 1.7           |
| 2VOF           | 1.8           |
| 2VOG           | 1.9           |
| 2VOG           | 1.9           |
| 2VOG           | 1.9           |
| 2VOH           | 1.9           |
| 2VOH           | 1.9           |
| 2VPD           | 2.77          |
| 2VPE           | 1.7           |
| 2VPE           | 1.7           |
| 2VPE           | 1.7           |
| 2VRC           | 2.5           |
| 2VRW           | 1.85          |
| 2VRW           | 1.85          |
| 2VRW           | 1.85          |
| 2VTB           | 2.01          |
| 2VTB           | 2.01          |
| 2VUS           | 2.6           |
| 2VZD           | 2.1           |
| 2VZD           | 2.1           |
| 2W2M           | 2.4           |
| 2W83           | 1.93          |
| 2W83           | 1.93          |
| 2WAX           | 2.3           |
| 2WEL           | 1.9           |
| 2WEL           | 1.9           |
| 2WEL           | 1.9           |
| 2WG3           | 2.6           |
| 2WG3           | 2.6           |
| 2WIN           | 3.9           |
| 2WIN           | 3.9           |
| 2WIN           | 3.9           |
| 2WIN           | 3.9           |
| 2WIN           | 3.9           |
| 2WIU           | 2.35          |
| 2WME           | 2.1           |
| 2WME           | 2.1           |
| 2WME           | 2.1           |
| 2WME           | 2.1           |
| 2WME           | 2.1           |
| 2WME           | 2.1           |
| 2Z2S           | 2.7           |



| A. PDB CODE | B. INTERFACE CHAINS | C. CHAIN | D. TITLE                                                                                    |
|-------------|---------------------|----------|---------------------------------------------------------------------------------------------|
| 2Z2S        | A B                 | A        | CRYSTAL STRUCTURE OF RHODOBACTER SPHAEROIDES SIGE IN COMPLEX WITH THE ANTI-SIGMA CHR        |
| 2Z2S        | A B                 | B        | CRYSTAL STRUCTURE OF RHODOBACTER SPHAEROIDES SIGE IN COMPLEX WITH THE ANTI-SIGMA CHR        |
| 2Z2S        | A H                 | A        | CRYSTAL STRUCTURE OF RHODOBACTER SPHAEROIDES SIGE IN COMPLEX WITH THE ANTI-SIGMA CHR        |
| 2Z2S        | C D                 | C        | CRYSTAL STRUCTURE OF RHODOBACTER SPHAEROIDES SIGE IN COMPLEX WITH THE ANTI-SIGMA CHR        |
| 2Z2S        | C D                 | C        | CRYSTAL STRUCTURE OF RHODOBACTER SPHAEROIDES SIGE IN COMPLEX WITH THE ANTI-SIGMA CHR        |
| 2Z2S        | E F                 | E        | CRYSTAL STRUCTURE OF RHODOBACTER SPHAEROIDES SIGE IN COMPLEX WITH THE ANTI-SIGMA CHR        |
| 2Z2S        | E F                 | F        | CRYSTAL STRUCTURE OF RHODOBACTER SPHAEROIDES SIGE IN COMPLEX WITH THE ANTI-SIGMA CHR        |
| 2Z2S        | G H                 | G        | CRYSTAL STRUCTURE OF RHODOBACTER SPHAEROIDES SIGE IN COMPLEX WITH THE ANTI-SIGMA CHR        |
| 2Z2S        | G H                 | G        | CRYSTAL STRUCTURE OF RHODOBACTER SPHAEROIDES SIGE IN COMPLEX WITH THE ANTI-SIGMA CHR        |
| 2Z2T        | A F                 | A        | CRYSTAL STRUCTURE OF THE COMPLEX BETWEEN GP41 FRAGMENT N36 AND FUSION INHIBITOR SC34E       |
| 2Z2T        | A F                 | F        | CRYSTAL STRUCTURE OF THE COMPLEX BETWEEN GP41 FRAGMENT N36 AND FUSION INHIBITOR SC34E       |
| 2Z2T        | B E                 | E        | CRYSTAL STRUCTURE OF THE COMPLEX BETWEEN GP41 FRAGMENT N36 AND FUSION INHIBITOR SC34E       |
| 2Z2T        | C E                 | C        | CRYSTAL STRUCTURE OF THE COMPLEX BETWEEN GP41 FRAGMENT N36 AND FUSION INHIBITOR SC34E       |
| 2Z2T        | C E                 | E        | CRYSTAL STRUCTURE OF THE COMPLEX BETWEEN GP41 FRAGMENT N36 AND FUSION INHIBITOR SC34E       |
| 2Z2T        | C F                 | F        | CRYSTAL STRUCTURE OF THE COMPLEX BETWEEN GP41 FRAGMENT N36 AND FUSION INHIBITOR SC34E       |
| 2Z3R        | E H                 | E        | CRYSTAL STRUCTURE OF THE IL-15/IL-15RA COMPLEX                                              |
| 2Z3R        | K J                 | K        | CRYSTAL STRUCTURE OF THE IL-15/IL-15RA COMPLEX                                              |
| 2ZET        | A C                 | C        | CRYSTAL STRUCTURE OF THE SMALL GTPASE RAB27B COMPLEXED WITH THE SLP HOMOMOLOGY DOMAIN       |
| 2ZET        | A C                 | C        | CRYSTAL STRUCTURE OF THE SMALL GTPASE RAB27B COMPLEXED WITH THE SLP HOMOMOLOGY DOMAIN       |
| 2ZET        | B D                 | D        | CRYSTAL STRUCTURE OF THE SMALL GTPASE RAB27B COMPLEXED WITH THE SLP HOMOMOLOGY DOMAIN       |
| 2ZET        | B D                 | D        | CRYSTAL STRUCTURE OF THE SMALL GTPASE RAB27B COMPLEXED WITH THE SLP HOMOMOLOGY DOMAIN       |
| 2ZFD        | A B                 | A        | THE CRYSTAL STRUCTURE OF PLANT SPECIFIC CALCIUM BINDING PROTEIN ATCBL2 IN COMPLEX WITH      |
| 2ZFD        | A B                 | A        | THE CRYSTAL STRUCTURE OF PLANT SPECIFIC CALCIUM BINDING PROTEIN ATCBL2 IN COMPLEX WITH      |
| 2ZFD        | A B                 | A        | THE CRYSTAL STRUCTURE OF PLANT SPECIFIC CALCIUM BINDING PROTEIN ATCBL2 IN COMPLEX WITH      |
| 2ZHX        | G H                 | H        | CRYSTAL STRUCTURE OF URACIL-DNA GLYCOSYLASE FROM MYCOBACTERIUM TUBERCULOSIS IN COMPLEX WITH |
| 2ZHX        | M N                 | M        | CRYSTAL STRUCTURE OF URACIL-DNA GLYCOSYLASE FROM MYCOBACTERIUM TUBERCULOSIS IN COMPLEX WITH |
| 2ZIV        | A B                 | A        | CRYSTAL STRUCTURE OF THE MUS81-EME1 COMPLEX                                                 |
| 2ZIV        | A B                 | A        | CRYSTAL STRUCTURE OF THE MUS81-EME1 COMPLEX                                                 |
| 2ZIV        | A B                 | A        | CRYSTAL STRUCTURE OF THE MUS81-EME1 COMPLEX                                                 |
| 2ZIV        | A B                 | B        | CRYSTAL STRUCTURE OF THE MUS81-EME1 COMPLEX                                                 |
| 2ZIV        | A B                 | B        | CRYSTAL STRUCTURE OF THE MUS81-EME1 COMPLEX                                                 |
| 2ZIV        | A B                 | B        | CRYSTAL STRUCTURE OF THE MUS81-EME1 COMPLEX                                                 |
| 2ZIX        | A B                 | A        | CRYSTAL STRUCTURE OF THE MUS81-EME1 COMPLEX                                                 |
| 2ZME        | A B                 | B        | INTEGRATED STRUCTURAL AND FUNCTIONAL MODEL OF THE HUMAN ESCRT-II COMPLEX                    |
| 2ZNL        | A B                 | A        | CRYSTAL STRUCTURE OF PA-PB1 COMPLEX FORM INFLUENZA VIRUS RNA POLYMERASE                     |
| 2ZNV        | A B                 | A        | CRYSTAL STRUCTURE OF HUMAN AMSH-LP DUB DOMAIN IN COMPLEX WITH LYS63-LINKED UBIQUITIN        |
| 2ZSH        | A B                 | A        | STRUCTURAL BASIS OF GIBBERELLIN(GA3)-INDUCED DELLA RECOGNITION BY THE GIBBERELLIN RECI      |
| 2ZSH        | A B                 | A        | STRUCTURAL BASIS OF GIBBERELLIN(GA3)-INDUCED DELLA RECOGNITION BY THE GIBBERELLIN RECI      |
| 2ZVN        | C H                 | H        | NEMO COZI DOMAIN INCOMPLEX WITH DIUBIQUITIN IN P212121 SPACE GROUP                          |
| 2ZVN        | G D                 | D        | NEMO COZI DOMAIN INCOMPLEX WITH DIUBIQUITIN IN P212121 SPACE GROUP                          |
| 2ZXE        | A B                 | A        | CRYSTAL STRUCTURE OF THE SODIUM - POTASSIUM PUMP IN THE E2.2K+.PI STATE                     |
| 2ZXE        | A B                 | B        | CRYSTAL STRUCTURE OF THE SODIUM - POTASSIUM PUMP IN THE E2.2K+.PI STATE                     |
| 2ZXE        | A G                 | G        | CRYSTAL STRUCTURE OF THE SODIUM - POTASSIUM PUMP IN THE E2.2K+.PI STATE                     |
| 2ZXX        | A C                 | A        | CRYSTAL STRUCTURE OF CDT1/GEMININ COMPLEX                                                   |
| 2ZXX        | B C                 | B        | CRYSTAL STRUCTURE OF CDT1/GEMININ COMPLEX                                                   |
| 2ZXX        | B F                 | F        | CRYSTAL STRUCTURE OF CDT1/GEMININ COMPLEX                                                   |
| 2ZYZ        | A D                 | A        | PYROBACULUM AEROPHILUM SPLICING ENDONUCLEASE                                                |
| 2ZYZ        | C B                 | C        | PYROBACULUM AEROPHILUM SPLICING ENDONUCLEASE                                                |
| 2ZYZ        | C D                 | C        | PYROBACULUM AEROPHILUM SPLICING ENDONUCLEASE                                                |
| 3A1G        | A B                 | A        | HIGH-RESOLUTION CRYSTAL STRUCTURE OF RNA POLYMERASE PB1-PB2 SUBUNITS FROM INFLUENZA A       |
| 3A1G        | A B                 | A        | HIGH-RESOLUTION CRYSTAL STRUCTURE OF RNA POLYMERASE PB1-PB2 SUBUNITS FROM INFLUENZA A       |
| 3A1G        | A B                 | B        | HIGH-RESOLUTION CRYSTAL STRUCTURE OF RNA POLYMERASE PB1-PB2 SUBUNITS FROM INFLUENZA A       |
| 3A1G        | C D                 | C        | HIGH-RESOLUTION CRYSTAL STRUCTURE OF RNA POLYMERASE PB1-PB2 SUBUNITS FROM INFLUENZA A       |
| 3A1Q        | D F                 | F        | CRYSTAL STRUCTURE OF THE MOUSE RAP80 UIMS IN COMPLEX WITH LYS63-LINKED DI-UBIQUITIN         |
| 3B4V        | E H                 | E        | X-RAY STRUCTURE OF ACTIVIN IN COMPLEX WITH FSTL3                                            |
| 3B4V        | E H                 | H        | X-RAY STRUCTURE OF ACTIVIN IN COMPLEX WITH FSTL3                                            |
| 3B7I        | B E                 | E        | CD4 ENDOCYTOSIS MOTIF BOUND TO THE FOCAL ADHESION TARGETING (FAT) DOMAIN OF THE FOCAL       |
| 3BC1        | A B                 | A        | CRYSTAL STRUCTURE OF THE COMPLEX RAB27A-SLP2A                                               |
| 3BC1        | A F                 | F        | CRYSTAL STRUCTURE OF THE COMPLEX RAB27A-SLP2A                                               |
| 3BC1        | E B                 | B        | CRYSTAL STRUCTURE OF THE COMPLEX RAB27A-SLP2A                                               |
| 3BC1        | E F                 | F        | CRYSTAL STRUCTURE OF THE COMPLEX RAB27A-SLP2A                                               |
| 3BEJ        | B F                 | B        | STRUCTURE OF HUMAN FXR IN COMPLEX WITH MFA-1 AND CO- ACTIVATOR PEPTIDE                      |
| 3BEJ        | B F                 | F        | STRUCTURE OF HUMAN FXR IN COMPLEX WITH MFA-1 AND CO- ACTIVATOR PEPTIDE                      |

TABLE S4

Jochim, et al

| A. PDB<br>CODE | E. FUNCTION                         | F. $\Delta\Delta G_{\text{AVG,HELIX}}$<br>(KCAL/MOL) | G. $\Delta\Delta G_{\text{SUM,HELIX}}$<br>(KCAL/MOL) | H. # HOTSPOT<br>RESIDUES | I. HELIX<br>LENGTH |
|----------------|-------------------------------------|------------------------------------------------------|------------------------------------------------------|--------------------------|--------------------|
| 2Z2S           | TRANSCRIPTION                       | 1.3                                                  | 7.9                                                  | 6                        | 18                 |
| 2Z2S           | TRANSCRIPTION                       | 1.5                                                  | 2.9                                                  | 2                        | 17                 |
| 2Z2S           | TRANSCRIPTION                       | 1.3                                                  | 2.5                                                  | 2                        | 18                 |
| 2Z2S           | TRANSCRIPTION                       | 1.8                                                  | 9.1                                                  | 5                        | 19                 |
| 2Z2S           | TRANSCRIPTION                       | 1.2                                                  | 2.4                                                  | 2                        | 12                 |
| 2Z2S           | TRANSCRIPTION                       | 1.9                                                  | 5.6                                                  | 3                        | 16                 |
| 2Z2S           | TRANSCRIPTION                       | 1.4                                                  | 2.8                                                  | 2                        | 17                 |
| 2Z2S           | TRANSCRIPTION                       | 1.7                                                  | 3.3                                                  | 2                        | 11                 |
| 2Z2S           | TRANSCRIPTION                       | 1.1                                                  | 2.1                                                  | 2                        | 17                 |
| 2Z2T           | VIRAL PROTEIN/INHIBITOR             | 1.4                                                  | 2.7                                                  | 2                        | 35                 |
| 2Z2T           | VIRAL PROTEIN/INHIBITOR             | 1.5                                                  | 4.5                                                  | 3                        | 31                 |
| 2Z2T           | VIRAL PROTEIN/INHIBITOR             | 1.6                                                  | 11.3                                                 | 7                        | 31                 |
| 2Z2T           | VIRAL PROTEIN/INHIBITOR             | 1.7                                                  | 8.4                                                  | 5                        | 35                 |
| 2Z2T           | VIRAL PROTEIN/INHIBITOR             | 1.8                                                  | 7.1                                                  | 4                        | 31                 |
| 2Z2T           | VIRAL PROTEIN/INHIBITOR             | 1.5                                                  | 9.0                                                  | 6                        | 31                 |
| 2Z3R           | CYTOKINE/CYTOKINE RECEPTOR          | 1.3                                                  | 2.5                                                  | 2                        | 20                 |
| 2Z3R           | CYTOKINE/CYTOKINE RECEPTOR          | 1.7                                                  | 3.4                                                  | 2                        | 20                 |
| 2ZET           | SIGNALING PROTEIN                   | 1.8                                                  | 7.3                                                  | 4                        | 42                 |
| 2ZET           | SIGNALING PROTEIN                   | 1.2                                                  | 2.3                                                  | 2                        | 14                 |
| 2ZET           | SIGNALING PROTEIN                   | 1.2                                                  | 3.5                                                  | 3                        | 42                 |
| 2ZET           | SIGNALING PROTEIN                   | 1.2                                                  | 2.3                                                  | 2                        | 14                 |
| 2ZFD           | SIGNALING PROTEIN/TRANSFERASE       | 1.7                                                  | 5.2                                                  | 3                        | 16                 |
| 2ZFD           | SIGNALING PROTEIN/TRANSFERASE       | 1.3                                                  | 2.6                                                  | 2                        | 11                 |
| 2ZFD           | SIGNALING PROTEIN/TRANSFERASE       | 1.5                                                  | 4.4                                                  | 3                        | 15                 |
| 2ZHX           | HYDROLASE/HYDROLASE INHIBITOR       | 1.7                                                  | 6.7                                                  | 4                        | 9                  |
| 2ZHX           | HYDROLASE/HYDROLASE INHIBITOR       | 1.8                                                  | 3.5                                                  | 2                        | 6                  |
| 2ZIV           | HYDROLASE                           | 1.4                                                  | 4.3                                                  | 3                        | 16                 |
| 2ZIV           | HYDROLASE                           | 1.8                                                  | 5.4                                                  | 3                        | 11                 |
| 2ZIV           | HYDROLASE                           | 1.2                                                  | 4.9                                                  | 4                        | 10                 |
| 2ZIV           | HYDROLASE                           | 1.8                                                  | 5.3                                                  | 3                        | 10                 |
| 2ZIV           | HYDROLASE                           | 1.3                                                  | 2.6                                                  | 2                        | 10                 |
| 2ZIV           | HYDROLASE                           | 1.9                                                  | 5.6                                                  | 3                        | 15                 |
| 2ZIX           | HYDROLASE                           | 1.3                                                  | 2.5                                                  | 2                        | 5                  |
| 2ZME           | PROTEIN TRANSPORT                   | 1.5                                                  | 4.5                                                  | 3                        | 22                 |
| 2ZNL           | TRANSCRIPTION                       | 1.3                                                  | 2.6                                                  | 2                        | 11                 |
| 2ZNV           | HYDROLASE/SIGNALING PROTEIN         | 1.9                                                  | 5.7                                                  | 3                        | 14                 |
| 2ZSH           | HORMONE RECEPTOR                    | 1.4                                                  | 7.2                                                  | 5                        | 18                 |
| 2ZSH           | HORMONE RECEPTOR                    | 1.9                                                  | 5.7                                                  | 3                        | 8                  |
| 2ZVN           | SIGNALING PROTEIN/TRANSCRIPTION     | 1.6                                                  | 4.9                                                  | 3                        | 51                 |
| 2ZVN           | SIGNALING PROTEIN/TRANSCRIPTION     | 1.1                                                  | 2.2                                                  | 2                        | 46                 |
| 2ZXE           | HYDROLASE/TRANSPORT PROTEIN         | 1.4                                                  | 4.3                                                  | 3                        | 30                 |
| 2ZXE           | HYDROLASE/TRANSPORT PROTEIN         | 1.9                                                  | 13.6                                                 | 7                        | 31                 |
| 2ZXE           | HYDROLASE/TRANSPORT PROTEIN         | 1.8                                                  | 9.1                                                  | 5                        | 24                 |
| 2ZXX           | CELL CYCLE/REPLICATION              | 1.7                                                  | 3.3                                                  | 2                        | 44                 |
| 2ZXX           | CELL CYCLE/REPLICATION              | 1.7                                                  | 5.0                                                  | 3                        | 38                 |
| 2ZXX           | CELL CYCLE/REPLICATION              | 1.6                                                  | 3.1                                                  | 2                        | 30                 |
| 2ZYZ           | SPLICING                            | 1.3                                                  | 2.5                                                  | 2                        | 13                 |
| 2ZYZ           | SPLICING                            | 1.6                                                  | 3.1                                                  | 2                        | 14                 |
| 2ZYZ           | SPLICING                            | 1.1                                                  | 3.2                                                  | 3                        | 14                 |
| 3A1G           | TRANSFERASE                         | 1.4                                                  | 2.7                                                  | 2                        | 11                 |
| 3A1G           | TRANSFERASE                         | 1.8                                                  | 5.4                                                  | 3                        | 11                 |
| 3A1G           | TRANSFERASE                         | 1.1                                                  | 2.2                                                  | 2                        | 10                 |
| 3A1G           | TRANSFERASE                         | 1.7                                                  | 3.3                                                  | 2                        | 11                 |
| 3A1Q           | GENE REGULATION/SIGNALING PROTEIN   | 1.1                                                  | 2.1                                                  | 2                        | 38                 |
| 3B4V           | HORMONE REGULATOR COMPLEX           | 1.6                                                  | 3.2                                                  | 2                        | 13                 |
| 3B4V           | HORMONE REGULATOR COMPLEX           | 1.8                                                  | 3.6                                                  | 2                        | 9                  |
| 3B71           | PROTEIN BINDING                     | 1.9                                                  | 3.8                                                  | 2                        | 10                 |
| 3BC1           | SIGNALING PROTEIN/TRANSPORT PROTEIN | 1.0                                                  | 2.0                                                  | 2                        | 19                 |
| 3BC1           | SIGNALING PROTEIN/TRANSPORT PROTEIN | 1.4                                                  | 2.8                                                  | 2                        | 29                 |
| 3BC1           | SIGNALING PROTEIN/TRANSPORT PROTEIN | 1.9                                                  | 11.1                                                 | 6                        | 29                 |
| 3BC1           | SIGNALING PROTEIN/TRANSPORT PROTEIN | 1.9                                                  | 13.0                                                 | 7                        | 29                 |
| 3BEJ           | TRANSCRIPTION REGULATOR             | 1.3                                                  | 2.5                                                  | 2                        | 26                 |
| 3BEJ           | TRANSCRIPTION REGULATOR             | 1.8                                                  | 3.5                                                  | 2                        | 8                  |

TABLE S4

Jochim, et al

| A. PDB<br>CODE | J. HELIX START<br>RESIDUE # | K. HELIX END<br>RESIDUE # |
|----------------|-----------------------------|---------------------------|
| 2Z2S           | 162                         | 179                       |
| 2Z2S           | 36                          | 52                        |
| 2Z2S           | 162                         | 179                       |
| 2Z2S           | 23                          | 41                        |
| 2Z2S           | 121                         | 132                       |
| 2Z2S           | 163                         | 178                       |
| 2Z2S           | 36                          | 52                        |
| 2Z2S           | 48                          | 58                        |
| 2Z2S           | 163                         | 179                       |
| 2Z2T           | 1547                        | 1581                      |
| 2Z2T           | 3631                        | 3661                      |
| 2Z2T           | 2631                        | 2661                      |
| 2Z2T           | 3547                        | 3581                      |
| 2Z2T           | 2631                        | 2661                      |
| 2Z2T           | 3631                        | 3661                      |
| 2Z3R           | 36                          | 55                        |
| 2Z3R           | 57                          | 76                        |
| 2ZET           | 12                          | 53                        |
| 2ZET           | 105                         | 118                       |
| 2ZET           | 12                          | 53                        |
| 2ZET           | 105                         | 118                       |
| 2ZFD           | 161                         | 176                       |
| 2ZFD           | 185                         | 195                       |
| 2ZFD           | 141                         | 155                       |
| 2ZHX           | 26                          | 34                        |
| 2ZHX           | 194                         | 199                       |
| 2ZIV           | 441                         | 456                       |
| 2ZIV           | 407                         | 417                       |
| 2ZIV           | 532                         | 541                       |
| 2ZIV           | 478                         | 487                       |
| 2ZIV           | 507                         | 516                       |
| 2ZIV           | 405                         | 419                       |
| 2ZIX           | 392                         | 396                       |
| 2ZME           | 173                         | 194                       |
| 2ZNL           | 405                         | 415                       |
| 2ZNV           | 358                         | 371                       |
| 2ZSH           | 18                          | 35                        |
| 2ZSH           | 43                          | 50                        |
| 2ZVN           | 286                         | 336                       |
| 2ZVN           | 291                         | 336                       |
| 2ZXE           | 847                         | 876                       |
| 2ZXE           | 31                          | 61                        |
| 2ZXE           | 16                          | 39                        |
| 2ZXX           | 95                          | 138                       |
| 2ZXX           | 93                          | 130                       |
| 2ZXX           | 300                         | 329                       |
| 2ZYZ           | 3                           | 15                        |
| 2ZYZ           | 2                           | 15                        |
| 2ZYZ           | 49                          | 62                        |
| 3A1G           | 746                         | 756                       |
| 3A1G           | 690                         | 700                       |
| 3A1G           | 14                          | 23                        |
| 3A1G           | 746                         | 756                       |
| 3A1Q           | 81                          | 118                       |
| 3B4V           | 58                          | 70                        |
| 3B4V           | 54                          | 62                        |
| 3B71           | 407                         | 416                       |
| 3BC1           | 170                         | 188                       |
| 3BC1           | 7                           | 35                        |
| 3BC1           | 7                           | 35                        |
| 3BC1           | 7                           | 35                        |
| 3BEJ           | 280                         | 305                       |
| 3BEJ           | 688                         | 695                       |

| A. PDB<br>CODE | L. HELIX SEQUENCE                                   |
|----------------|-----------------------------------------------------|
| 2Z2S           | LGTIKSRIALDRLRQH                                    |
| 2Z2S           | DECRARAGALDAVGGSL                                   |
| 2Z2S           | LGTIKSRIALDRLRQH                                    |
| 2Z2S           | EAAFAELFQHFAPKVKGFL                                 |
| 2Z2S           | QENARLGRAIAR                                        |
| 2Z2S           | GTIKSRIALDRLRQ                                      |
| 2Z2S           | DECRARAGALDAVGGSL                                   |
| 2Z2S           | ASQAEECAQDV                                         |
| 2Z2S           | GTIKSRIALDRLRQH                                     |
| 2Z2T           | DIVQQNNLLRAIEAQQHLLQLTVWGIKQLQARIL                  |
| 2Z2T           | WDRKIEEYTKKIEELIKKSQEQQEKNEKELK                     |
| 2Z2T           | WDRKIEEYTKKIEELIKKSQEQQEKNEKELK                     |
| 2Z2T           | DIVQQNNLLRAIEAQQHLLQLTVWGIKQLQARIL                  |
| 2Z2T           | WDRKIEEYTKKIEELIKKSQEQQEKNEKELK                     |
| 2Z2T           | WDRKIEEYTKKIEELIKKSQEQQEKNEKELK                     |
| 2Z3R           | KVTAMKCFLELQVISLESG                                 |
| 2Z3R           | ASIHDTVENLILANNSLS                                  |
| 2ZET           | DEEAHVWAVVQRDFDLRRREEERLQGLKGKIQKESKRELL            |
| 2ZET           | DPCHLARVVKIGSL                                      |
| 2ZET           | DEEAHVWAVVQRDFDLRRREEERLQGLKGKIQKESKRELL            |
| 2ZET           | DPCHLARVVKIGSL                                      |
| 2ZFD           | DTVIEDIHDKTFFEEAD                                   |
| 2ZFD           | KEEWRSVLRLH                                         |
| 2ZFD           | RQEVKQMVVATLAES                                     |
| 2ZHX           | PEEVEEVIG                                           |
| 2ZHX           | PLSASR                                              |
| 2ZIV           | ESTLQQAIVNTQVVDG                                    |
| 2ZIV           | RFREQKFRLLK                                         |
| 2ZIV           | VREVFARQLM                                          |
| 2ZIV           | LALVWRRQIQ                                          |
| 2ZIV           | PQLLVQAYQQ                                          |
| 2ZIV           | RVDAEEALVDLQLHT                                     |
| 2ZIX           | QVIDG                                               |
| 2ZME           | NISEAFEDLSKLMIAKAKEMVEL                             |
| 2ZNL           | SWIQNEFNKAC                                         |
| 2ZNV           | SVDLHTHCSYQLML                                      |
| 2ZSH           | LNTWVLISNFKVAYNILR                                  |
| 2ZSH           | RHLAEYLD                                            |
| 2ZVN           | IVMETVPVLKAQADIYKADFQAERHAREKLVEKKEYLQEQLEQLQREFNKL |
| 2ZVN           | VPVLKAQADIYKADFQAERHAREKLVEKKEYLQEQLEQLQREFNKL      |
| 2ZXE           | ERLISMAYGQIGMIQALGGFFSYFVILAEN                      |
| 2ZXE           | SSWFKIFLFYLIFYGCLAGIFIGTIQVLLLT                     |
| 2ZXE           | YYRLRVVGLIVA AVL CVIGIILL                           |
| 2ZXX           | YWKEVAEQRRKALYEALKENEKLHKEIEQKDSEIARLRKENKDL        |
| 2ZXX           | SQYWKEVAEQRRKALYEALKENEKLHKEIEQKDSEIAR              |
| 2ZXX           | ATCLLQRRQVFRQNLVERVKEQHKVFLASL                      |
| 2ZYZ           | VLQEQVFKDLKSR                                       |
| 2ZYZ           | DVLQEQVFKDLKSR                                      |
| 2ZYZ           | IQTLLSVINMGETL                                      |
| 3A1G           | ICSTIEELRRQ                                         |
| 3A1G           | QRCCNLFKFF                                          |
| 3A1G           | SRTREILTKT                                          |
| 3A1G           | ICSTIEELRRQ                                         |
| 3A1Q           | EEEQFALALKMSEQEAREVNNQEEKEEELRKAIAESL               |
| 3B4V           | FHSTVINHYRMRG                                       |
| 3B4V           | KINLLGFLG                                           |
| 3B7I           | MSQIKRLLSE                                          |
| 3BC1           | ISHAIEMLLDLIMKRMERS                                 |
| 3BC1           | PEFEEQEAIMKVLQRDAALKRAEEERVRH                       |
| 3BC1           | PEFEEQEAIMKVLQRDAALKRAEEERVRH                       |
| 3BC1           | PEFEEQEAIMKVLQRDAALKRAEEERVRH                       |
| 3BEJ           | AEENFLILTEMATNHVQVLEFTKKL                           |
| 3BEJ           | KILHRLQ                                             |

| A. PDB<br>CODE | M. RESOLUTION |
|----------------|---------------|
| 2Z2S           | 2.7           |
| 2Z2S           | 2.7           |
| 2Z2S           | 2.7           |
| 2Z2S           | 2.7           |
| 2Z2S           | 2.7           |
| 2Z2S           | 2.7           |
| 2Z2S           | 2.7           |
| 2Z2S           | 2.7           |
| 2Z2T           | 2.1           |
| 2Z2T           | 2.1           |
| 2Z2T           | 2.1           |
| 2Z2T           | 2.1           |
| 2Z2T           | 2.1           |
| 2Z2T           | 2.1           |
| 2Z3R           | 2             |
| 2Z3R           | 2             |
| 2ZET           | 3             |
| 2ZET           | 3             |
| 2ZET           | 3             |
| 2ZET           | 3             |
| 2ZFD           | 1.2           |
| 2ZFD           | 1.2           |
| 2ZFD           | 1.2           |
| 2ZHX           | 3.1           |
| 2ZHX           | 3.1           |
| 2ZIV           | 2.7           |
| 2ZIV           | 2.7           |
| 2ZIV           | 2.7           |
| 2ZIV           | 2.7           |
| 2ZIV           | 2.7           |
| 2ZIV           | 2.7           |
| 2ZIX           | 3.5           |
| 2ZME           | 2.9           |
| 2ZNL           | 2.3           |
| 2ZNV           | 1.6           |
| 2ZSH           | 1.8           |
| 2ZSH           | 1.8           |
| 2ZVN           | 3             |
| 2ZVN           | 3             |
| 2ZXE           | 2.4           |
| 2ZXE           | 2.4           |
| 2ZXE           | 2.4           |
| 2ZXX           | 2.8           |
| 2ZXX           | 2.8           |
| 2ZXX           | 2.8           |
| 2ZYZ           | 1.7           |
| 2ZYZ           | 1.7           |
| 2ZYZ           | 1.7           |
| 3A1G           | 1.7           |
| 3A1G           | 1.7           |
| 3A1G           | 1.7           |
| 3A1G           | 1.7           |
| 3A1Q           | 2.2           |
| 3B4V           | 2.48          |
| 3B4V           | 2.48          |
| 3B71           | 2.82          |
| 3BC1           | 1.8           |
| 3BC1           | 1.8           |
| 3BC1           | 1.8           |
| 3BC1           | 1.8           |
| 3BEJ           | 1.9           |
| 3BEJ           | 1.9           |

| A. PDB CODE | B. INTERFACE CHAINS | C. CHAIN | D. TITLE                                                                                                         |
|-------------|---------------------|----------|------------------------------------------------------------------------------------------------------------------|
| 3BG0        | A B                 | B        | ARCHITECTURE OF A COAT FOR THE NUCLEAR PORE MEMBRANE                                                             |
| 3BIM        | E N                 | E        | CRYSTAL STRUCTURE OF THE BCL6 BTB DOMAIN DIMER IN COMPLEX WITH THE BCOR BBD COREPRESSOR                          |
| 3BJI        | A D                 | A        | STRUCTURAL BASIS OF PROMISCUOUS GUANINE NUCLEOTIDE EXCHANGE BY THE T-CELL ESSENTIAL NUCLEOTIDE EXCHANGE FACTOR 1 |
| 3BJI        | B C                 | C        | STRUCTURAL BASIS OF PROMISCUOUS GUANINE NUCLEOTIDE EXCHANGE BY THE T-CELL ESSENTIAL NUCLEOTIDE EXCHANGE FACTOR 1 |
| 3BL2        | A C                 | A        | CRYSTAL STRUCTURE OF M11, THE BCL-2 HOMOLOG OF MURINE GAMMA- HERPESVIRUS 68, COMPLEXED WITH BCL-2                |
| 3BL2        | B D                 | B        | CRYSTAL STRUCTURE OF M11, THE BCL-2 HOMOLOG OF MURINE GAMMA- HERPESVIRUS 68, COMPLEXED WITH BCL-2                |
| 3BL2        | B D                 | B        | CRYSTAL STRUCTURE OF M11, THE BCL-2 HOMOLOG OF MURINE GAMMA- HERPESVIRUS 68, COMPLEXED WITH BCL-2                |
| 3BLH        | A B                 | A        | CRYSTAL STRUCTURE OF HUMAN CDK9/CYCLINT1                                                                         |
| 3BLH        | A B                 | B        | CRYSTAL STRUCTURE OF HUMAN CDK9/CYCLINT1                                                                         |
| 3BOW        | A B                 | A        | STRUCTURE OF M-CALPAIN IN COMPLEX WITH CALPASTATIN                                                               |
| 3BOW        | A B                 | B        | STRUCTURE OF M-CALPAIN IN COMPLEX WITH CALPASTATIN                                                               |
| 3BOW        | A C                 | C        | STRUCTURE OF M-CALPAIN IN COMPLEX WITH CALPASTATIN                                                               |
| 3BOW        | A C                 | C        | STRUCTURE OF M-CALPAIN IN COMPLEX WITH CALPASTATIN                                                               |
| 3BP8        | B D                 | B        | CRYSTAL STRUCTURE OF MLC/EIIB COMPLEX                                                                            |
| 3BPL        | A B                 | A        | CRYSTAL STRUCTURE OF THE IL4-IL4R-COMMON GAMMA TERNARY COMPLEX                                                   |
| 3BPN        | A B                 | A        | CRYSTAL STRUCTURE OF THE IL4-IL4R-IL13RA TERNARY COMPLEX                                                         |
| 3BPN        | A C                 | A        | CRYSTAL STRUCTURE OF THE IL4-IL4R-IL13RA TERNARY COMPLEX                                                         |
| 3BPQ        | A B                 | B        | CRYSTAL STRUCTURE OF RELB-RELE ANTITOXIN-TOXIN COMPLEX FROM METHANOCOCCUS JANNASCHII                             |
| 3BPQ        | C B                 | B        | CRYSTAL STRUCTURE OF RELB-RELE ANTITOXIN-TOXIN COMPLEX FROM METHANOCOCCUS JANNASCHII                             |
| 3BPS        | PA                  | A        | PCSK9:EGF-A COMPLEX                                                                                              |
| 3BPS        | PA                  | A        | PCSK9:EGF-A COMPLEX                                                                                              |
| 3BRT        | A D                 | D        | NEMO/IKK ASSOCIATION DOMAIN STRUCTURE                                                                            |
| 3BRT        | C B                 | B        | NEMO/IKK ASSOCIATION DOMAIN STRUCTURE                                                                            |
| 3BRT        | C B                 | C        | NEMO/IKK ASSOCIATION DOMAIN STRUCTURE                                                                            |
| 3BRT        | C D                 | C        | NEMO/IKK ASSOCIATION DOMAIN STRUCTURE                                                                            |
| 3BRT        | C D                 | D        | NEMO/IKK ASSOCIATION DOMAIN STRUCTURE                                                                            |
| 3BRV        | A D                 | D        | NEMO/IKKB ASSOCIATION DOMAIN STRUCTURE                                                                           |
| 3BUA        | A E                 | A        | CRYSTAL STRUCTURE OF TRF2 TRFH DOMAIN AND APOLLO PEPTIDE COMPLEX                                                 |
| 3BUA        | A E                 | A        | CRYSTAL STRUCTURE OF TRF2 TRFH DOMAIN AND APOLLO PEPTIDE COMPLEX                                                 |
| 3BUA        | B F                 | B        | CRYSTAL STRUCTURE OF TRF2 TRFH DOMAIN AND APOLLO PEPTIDE COMPLEX                                                 |
| 3BUA        | C G                 | C        | CRYSTAL STRUCTURE OF TRF2 TRFH DOMAIN AND APOLLO PEPTIDE COMPLEX                                                 |
| 3BXK        | C D                 | C        | CRYSTAL STRUCTURE OF THE P/Q-TYPE CALCIUM CHANNEL (CAV2.1) IQ DOMAIN AND CA2-CALMODULIN                          |
| 3BXK        | C D                 | D        | CRYSTAL STRUCTURE OF THE P/Q-TYPE CALCIUM CHANNEL (CAV2.1) IQ DOMAIN AND CA2-CALMODULIN                          |
| 3BZL        | A C                 | C        | CRYSTAL STRUCTURE OF NATIVE ESCU C-TERMINAL DOMAIN                                                               |
| 3C3Q        | A B                 | A        | ALIX BRO1-DOMAIN:CHMIP4B CO-CRYSTAL STRUCTURE                                                                    |
| 3C4M        | A C                 | A        | STRUCTURE OF HUMAN PARATHYROID HORMONE IN COMPLEX WITH THE EXTRACELLULAR DOMAIN OF THE RECEPTOR                  |
| 3C4M        | B D                 | B        | STRUCTURE OF HUMAN PARATHYROID HORMONE IN COMPLEX WITH THE EXTRACELLULAR DOMAIN OF THE RECEPTOR                  |
| 3C59        | A B                 | B        | CRYSTAL STRUCTURE OF THE LIGAND-BOUND GLUCAGON-LIKE PEPTIDE- 1 RECEPTOR EXTRACELLULAR DOMAIN                     |
| 3C5W        | A C                 | A        | COMPLEX BETWEEN PP2A-SPECIFIC METHYLESTERASE PME-1 AND PP2A CORE ENZYME                                          |
| 3C5W        | A C                 | A        | COMPLEX BETWEEN PP2A-SPECIFIC METHYLESTERASE PME-1 AND PP2A CORE ENZYME                                          |
| 3C5W        | A C                 | A        | COMPLEX BETWEEN PP2A-SPECIFIC METHYLESTERASE PME-1 AND PP2A CORE ENZYME                                          |
| 3C5W        | A C                 | A        | COMPLEX BETWEEN PP2A-SPECIFIC METHYLESTERASE PME-1 AND PP2A CORE ENZYME                                          |
| 3C5W        | C P                 | P        | COMPLEX BETWEEN PP2A-SPECIFIC METHYLESTERASE PME-1 AND PP2A CORE ENZYME                                          |
| 3CDG        | A J                 | A        | HUMAN CD94/NKG2A IN COMPLEX WITH HLA-E                                                                           |
| 3CFV        | A F                 | F        | STRUCTURAL BASIS OF THE INTERACTION OF RBAP46/RBAP48 WITH HISTONE H4                                             |
| 3CFV        | B E                 | E        | STRUCTURAL BASIS OF THE INTERACTION OF RBAP46/RBAP48 WITH HISTONE H4                                             |
| 3CHW        | P V                 | P        | COMPLEX OF DICTYOSTELIUM DISCOIDEUM ACTIN WITH PROFILIN AND THE LAST POLY-PRO OF HUMAN RIBOSOMAL PROTEIN L11     |
| 3CJT        | C D                 | D        | RIBOSOMAL PROTEIN L11 METHYLTRANSFERASE (PRMA) IN COMPLEX WITH DIMETHYLATED RIBOSOMAL PROTEIN L11                |
| 3CJT        | E F                 | E        | RIBOSOMAL PROTEIN L11 METHYLTRANSFERASE (PRMA) IN COMPLEX WITH DIMETHYLATED RIBOSOMAL PROTEIN L11                |
| 3CJT        | E F                 | F        | RIBOSOMAL PROTEIN L11 METHYLTRANSFERASE (PRMA) IN COMPLEX WITH DIMETHYLATED RIBOSOMAL PROTEIN L11                |
| 3CJT        | I J                 | I        | RIBOSOMAL PROTEIN L11 METHYLTRANSFERASE (PRMA) IN COMPLEX WITH DIMETHYLATED RIBOSOMAL PROTEIN L11                |
| 3CL3        | A D                 | D        | CRYSTAL STRUCTURE OF A VFLIP-IKKGAMMA COMPLEX: INSIGHTS INTO VIRAL ACTIVATION OF THE IKK                         |
| 3CM8        | A B                 | B        | A RNA POLYMERASE SUBUNIT STRUCTURE FROM VIRUS                                                                    |
| 3CQC        | A B                 | A        | NUCLEOPORIN NUP107/NUP133 INTERACTION COMPLEX                                                                    |
| 3CQC        | A B                 | B        | NUCLEOPORIN NUP107/NUP133 INTERACTION COMPLEX                                                                    |
| 3CQC        | A B                 | B        | NUCLEOPORIN NUP107/NUP133 INTERACTION COMPLEX                                                                    |
| 3CQX        | A D                 | A        | CHAPERONE COMPLEX                                                                                                |
| 3CQX        | A D                 | D        | CHAPERONE COMPLEX                                                                                                |
| 3CQX        | B C                 | C        | CHAPERONE COMPLEX                                                                                                |
| 3CUQ        | A B                 | A        | INTEGRATED STRUCTURAL AND FUNCTIONAL MODEL OF THE HUMAN ESCRT-II COMPLEX                                         |
| 3CUQ        | A B                 | A        | INTEGRATED STRUCTURAL AND FUNCTIONAL MODEL OF THE HUMAN ESCRT-II COMPLEX                                         |
| 3CUQ        | A B                 | A        | INTEGRATED STRUCTURAL AND FUNCTIONAL MODEL OF THE HUMAN ESCRT-II COMPLEX                                         |
| 3CUQ        | A B                 | B        | INTEGRATED STRUCTURAL AND FUNCTIONAL MODEL OF THE HUMAN ESCRT-II COMPLEX                                         |

TABLE S4

Jochim, et al

| A. PDB<br>CODE | E. FUNCTION                         | F. $\Delta\Delta G_{\text{AVG,HELIX}}$<br>(KCAL/MOL) | G. $\Delta\Delta G_{\text{SUM,HELIX}}$<br>(KCAL/MOL) | H. # HOTSPOT<br>RESIDUES | I. HELIX<br>LENGTH |
|----------------|-------------------------------------|------------------------------------------------------|------------------------------------------------------|--------------------------|--------------------|
| 3BG0           | PROTEIN TRANSPORT, HYDROLASE        | 1.8                                                  | 3.6                                                  | 2                        | 17                 |
| 3BIM           | TRANSCRIPTION REPRESSOR             | 1.2                                                  | 3.6                                                  | 3                        | 15                 |
| 3BJI           | SIGNALING PROTEIN                   | 1.1                                                  | 2.2                                                  | 2                        | 13                 |
| 3BJI           | SIGNALING PROTEIN                   | 1.9                                                  | 5.8                                                  | 3                        | 5                  |
| 3BL2           | VIRAL PROTEIN/APOPTOSIS             | 1.5                                                  | 2.9                                                  | 2                        | 9                  |
| 3BL2           | VIRAL PROTEIN/APOPTOSIS             | 1.8                                                  | 5.3                                                  | 3                        | 22                 |
| 3BL2           | VIRAL PROTEIN/APOPTOSIS             | 1.7                                                  | 3.3                                                  | 2                        | 13                 |
| 3BLH           | TRANSCRIPTION                       | 1.4                                                  | 4.2                                                  | 3                        | 13                 |
| 3BLH           | TRANSCRIPTION                       | 1.4                                                  | 2.7                                                  | 2                        | 21                 |
| 3BOW           | HYDROLASE/HYDROLASE INHIBITOR       | 1.5                                                  | 3.0                                                  | 2                        | 9                  |
| 3BOW           | HYDROLASE/HYDROLASE INHIBITOR       | 1.8                                                  | 9.0                                                  | 5                        | 11                 |
| 3BOW           | HYDROLASE/HYDROLASE INHIBITOR       | 1.6                                                  | 6.3                                                  | 4                        | 12                 |
| 3BOW           | HYDROLASE/HYDROLASE INHIBITOR       | 1.7                                                  | 5.1                                                  | 3                        | 8                  |
| 3BP8           | TRANSCRIPTION                       | 1.3                                                  | 2.6                                                  | 2                        | 16                 |
| 3BPL           | CYTOKINE/CYTOKINE RECEPTOR          | 1.8                                                  | 7.0                                                  | 4                        | 16                 |
| 3BPN           | CYTOKINE/CYTOKINE RECEPTOR          | 1.7                                                  | 3.3                                                  | 2                        | 26                 |
| 3BPN           | CYTOKINE/CYTOKINE RECEPTOR          | 1.4                                                  | 2.7                                                  | 2                        | 16                 |
| 3BPQ           | TOXIN                               | 1.6                                                  | 4.9                                                  | 3                        | 8                  |
| 3BPQ           | TOXIN                               | 1.7                                                  | 3.4                                                  | 2                        | 8                  |
| 3BPS           | HYDROLASE/LIPID TRANSPORT           | 1.4                                                  | 2.8                                                  | 2                        | 13                 |
| 3BPS           | HYDROLASE/LIPID TRANSPORT           | 1.8                                                  | 5.3                                                  | 3                        | 18                 |
| 3BRT           | TRANSFERASE/TRANSCRIPTION           | 1.6                                                  | 4.7                                                  | 3                        | 60                 |
| 3BRT           | TRANSFERASE/TRANSCRIPTION           | 1.2                                                  | 3.7                                                  | 3                        | 60                 |
| 3BRT           | TRANSFERASE/TRANSCRIPTION           | 1.5                                                  | 4.4                                                  | 3                        | 27                 |
| 3BRT           | TRANSFERASE/TRANSCRIPTION           | 1.2                                                  | 3.7                                                  | 3                        | 27                 |
| 3BRT           | TRANSFERASE/TRANSCRIPTION           | 1.7                                                  | 6.8                                                  | 4                        | 60                 |
| 3BRV           | TRANSFERASE/TRANSCRIPTION           | 1.2                                                  | 4.8                                                  | 4                        | 60                 |
| 3BUA           | DNA BINDING PROTEIN                 | 1.4                                                  | 5.4                                                  | 4                        | 19                 |
| 3BUA           | DNA BINDING PROTEIN                 | 1.7                                                  | 3.3                                                  | 2                        | 17                 |
| 3BUA           | DNA BINDING PROTEIN                 | 1.7                                                  | 8.5                                                  | 5                        | 16                 |
| 3BUA           | DNA BINDING PROTEIN                 | 1.1                                                  | 2.2                                                  | 2                        | 15                 |
| 3BXK           | MEMBRANE PROTEIN, SIGNALING PROTEIN | 1.2                                                  | 2.4                                                  | 2                        | 15                 |
| 3BXK           | MEMBRANE PROTEIN, SIGNALING PROTEIN | 1.9                                                  | 13.2                                                 | 7                        | 18                 |
| 3BZL           | MEMBRANE PROTEIN, PROTEIN TRANSPORT | 1.4                                                  | 4.3                                                  | 3                        | 13                 |
| 3C3Q           | TRANSPORT PROTEIN                   | 1.2                                                  | 2.3                                                  | 2                        | 23                 |
| 3C4M           | MEMBRANE PROTEIN                    | 1.7                                                  | 3.3                                                  | 2                        | 21                 |
| 3C4M           | MEMBRANE PROTEIN                    | 1.6                                                  | 3.2                                                  | 2                        | 24                 |
| 3C59           | SIGNALING PROTEIN/SIGNALING PROTEIN | 1.9                                                  | 5.6                                                  | 3                        | 6                  |
| 3C5W           | HYDROLASE                           | 1.4                                                  | 2.7                                                  | 2                        | 17                 |
| 3C5W           | HYDROLASE                           | 1.4                                                  | 2.7                                                  | 2                        | 14                 |
| 3C5W           | HYDROLASE                           | 1.7                                                  | 3.3                                                  | 2                        | 19                 |
| 3C5W           | HYDROLASE                           | 1.7                                                  | 3.3                                                  | 2                        | 17                 |
| 3C5W           | HYDROLASE                           | 1.1                                                  | 2.1                                                  | 2                        | 9                  |
| 3CDG           | IMMUNE SYSTEM                       | 1.7                                                  | 3.3                                                  | 2                        | 29                 |
| 3CFV           | HISTONE/CHAPERONE                   | 1.7                                                  | 5.1                                                  | 3                        | 10                 |
| 3CFV           | HISTONE/CHAPERONE                   | 1.4                                                  | 4.3                                                  | 3                        | 9                  |
| 3CHW           | STRUCTURAL PROTEIN                  | 1.2                                                  | 2.4                                                  | 2                        | 18                 |
| 3CJT           | TRANSFERASE/RIBOSOMAL PROTEIN       | 1.4                                                  | 2.7                                                  | 2                        | 8                  |
| 3CJT           | TRANSFERASE/RIBOSOMAL PROTEIN       | 1.8                                                  | 3.6                                                  | 2                        | 10                 |
| 3CJT           | TRANSFERASE/RIBOSOMAL PROTEIN       | 1.9                                                  | 3.8                                                  | 2                        | 9                  |
| 3CJT           | TRANSFERASE/RIBOSOMAL PROTEIN       | 1.6                                                  | 4.7                                                  | 3                        | 8                  |
| 3CL3           | VIRAL PROTEIN/SIGNALING PROTEIN     | 1.8                                                  | 5.3                                                  | 3                        | 53                 |
| 3CM8           | RNA BINDING PROTEIN/TRANSFERASE     | 1.9                                                  | 5.8                                                  | 3                        | 5                  |
| 3CQC           | PROTEIN TRANSPORT                   | 1.3                                                  | 3.9                                                  | 3                        | 21                 |
| 3CQC           | PROTEIN TRANSPORT                   | 1.8                                                  | 5.5                                                  | 3                        | 18                 |
| 3CQC           | PROTEIN TRANSPORT                   | 1.4                                                  | 2.7                                                  | 2                        | 8                  |
| 3CQX           | CHAPERONE                           | 1.8                                                  | 5.5                                                  | 3                        | 18                 |
| 3CQX           | CHAPERONE                           | 1.9                                                  | 3.7                                                  | 2                        | 9                  |
| 3CQX           | CHAPERONE                           | 1.5                                                  | 3.0                                                  | 2                        | 24                 |
| 3CUQ           | PROTEIN TRANSPORT                   | 1.2                                                  | 2.4                                                  | 2                        | 15                 |
| 3CUQ           | PROTEIN TRANSPORT                   | 1.4                                                  | 4.3                                                  | 3                        | 19                 |
| 3CUQ           | PROTEIN TRANSPORT                   | 1.8                                                  | 7.0                                                  | 4                        | 23                 |
| 3CUQ           | PROTEIN TRANSPORT                   | 1.7                                                  | 5.0                                                  | 3                        | 21                 |

TABLE S4

Jochim, et al

| A. PDB<br>CODE | J. HELIX START<br>RESIDUE # | K. HELIX END<br>RESIDUE # |
|----------------|-----------------------------|---------------------------|
| 3BG0           | 534                         | 550                       |
| 3BIM           | 14                          | 28                        |
| 3BJI           | 322                         | 334                       |
| 3BJI           | 65                          | 69                        |
| 3BL2           | 71                          | 79                        |
| 3BL2           | 35                          | 56                        |
| 3BL2           | 67                          | 79                        |
| 3BLH           | 61                          | 73                        |
| 3BLH           | 124                         | 144                       |
| 3BOW           | 640                         | 648                       |
| 3BOW           | 260                         | 270                       |
| 3BOW           | 573                         | 584                       |
| 3BOW           | 621                         | 628                       |
| 3BP8           | 124                         | 139                       |
| 3BPL           | 5                           | 20                        |
| 3BPN           | 70                          | 95                        |
| 3BPN           | 5                           | 20                        |
| 3BPQ           | 80                          | 87                        |
| 3BPQ           | 80                          | 87                        |
| 3BPS           | 295                         | 307                       |
| 3BPS           | 261                         | 278                       |
| 3BRT           | 51                          | 110                       |
| 3BRT           | 50                          | 109                       |
| 3BRT           | 705                         | 731                       |
| 3BRT           | 705                         | 731                       |
| 3BRT           | 51                          | 110                       |
| 3BRV           | 50                          | 109                       |
| 3BUA           | 94                          | 112                       |
| 3BUA           | 73                          | 89                        |
| 3BUA           | 97                          | 112                       |
| 3BUA           | 98                          | 112                       |
| 3BXX           | 6                           | 20                        |
| 3BXX           | 1961                        | 1978                      |
| 3BZL           | 289                         | 301                       |
| 3C3Q           | 143                         | 165                       |
| 3C4M           | 34                          | 54                        |
| 3C4M           | 34                          | 57                        |
| 3C59           | 23                          | 28                        |
| 3C5W           | 534                         | 550                       |
| 3C5W           | 573                         | 586                       |
| 3C5W           | 417                         | 435                       |
| 3C5W           | 495                         | 511                       |
| 3C5W           | 328                         | 336                       |
| 3CDG           | 57                          | 85                        |
| 3CFV           | 31                          | 40                        |
| 3CFV           | 31                          | 39                        |
| 3CHW           | 120                         | 137                       |
| 3CJT           | 22                          | 29                        |
| 3CJT           | 14                          | 23                        |
| 3CJT           | 22                          | 30                        |
| 3CJT           | 17                          | 24                        |
| 3CL3           | 195                         | 247                       |
| 3CM8           | 6                           | 10                        |
| 3CQC           | 894                         | 914                       |
| 3CQC           | 964                         | 981                       |
| 3CQC           | 936                         | 943                       |
| 3CQX           | 257                         | 274                       |
| 3CQX           | 153                         | 161                       |
| 3CQX           | 164                         | 187                       |
| 3CUQ           | 62                          | 76                        |
| 3CUQ           | 35                          | 53                        |
| 3CUQ           | 93                          | 115                       |
| 3CUQ           | 174                         | 194                       |



| A. PDB<br>CODE | L. HELIX SEQUENCE                                           |
|----------------|-------------------------------------------------------------|
| 3BG0           | SQLIFNAQALKDRYEGN                                           |
| 3BIM           | HASDVLLNLNRLRSR                                             |
| 3BJI           | LRDLLMVPMQRVL                                               |
| 3BJI           | DRLRP                                                       |
| 3BL2           | LSKLFTSLF                                                   |
| 3BL2           | LVDVSKIITLTQEFRRHYDSVY                                      |
| 3BL2           | WKRDL SKLFTSLF                                              |
| 3BLH           | ITALREIKILQLL                                               |
| 3BLH           | EAYLQQVQDLVILESIHLQTL                                       |
| 3BOW           | CQLHQVIVA                                                   |
| 3BOW           | IQEWLQLTMYL                                                 |
| 3BOW           | DDALDELSDSL                                                 |
| 3BOW           | PEYRHLLD                                                    |
| 3BP8           | LLDRIISHIDQFFIRH                                            |
| 3BPL           | ITLQEIHKTLNSLTEQ                                            |
| 3BPN           | AQQFHRHKQLIRFLKRLDRNLWGLAG                                  |
| 3BPN           | ITLQEIHKTLNSLTEQ                                            |
| 3BPQ           | RKSIYDYF                                                    |
| 3BPQ           | RKSIYDYF                                                    |
| 3BPS           | RVLNAACQLARA                                                |
| 3BPS           | VSGTLIGLEFIRKSQVLQ                                          |
| 3BRT           | LQRCLEENQELRDAIRQSNQILRERCEELLHFQASQREEKEFLMCKFQEARLVERLGL  |
| 3BRT           | TLQRCLEENQELRDAIRQSNQILRERCEELLHFQASQREEKEFLMCKFQEARLVERLGL |
| 3BRT           | SEELVAEAHNLCITLLENAIQDITVREQG                               |
| 3BRT           | SEELVAEAHNLCITLLENAIQDITVREQG                               |
| 3BRT           | LQRCLEENQELRDAIRQSNQILRERCEELLHFQASQREEKEFLMCKFQEARLVERLGL  |
| 3BRV           | TLQRCLEENQELRDAIRQSNQILRERCEELLHFQASQREEKEFLMCKFQEARLVERLGL |
| 3BUA           | EHTVSRLLRVMQCLSRIE                                          |
| 3BUA           | YGDFRQIRDIMQALLVR                                           |
| 3BUA           | VSRLLRVMQCLSRIE                                             |
| 3BUA           | SRLLRVMQCLSRIE                                              |
| 3BXK           | EEQIAEFKEAFSLFD                                             |
| 3BXK           | IYAAMMIMEYYRQSKAKK                                          |
| 3BZL           | AKALQIKLAELY                                                |
| 3C3Q           | DEGLKIAAKHYQFASGAFHLIKE                                     |
| 3C4M           | KEEQIFLLHRAQAQCEKRLKE                                       |
| 3C4M           | KEEQIFLLHRAQAQCEKRLKEVLQ                                    |
| 3C59           | IEWLKN                                                      |
| 3C5W           | ANVRFNVAKSLQKIGPI                                           |
| 3C5W           | VDVKYFAQEALTVL                                              |
| 3C5W           | WRVRLAIIHEYMPLLAGQLG                                        |
| 3C5W           | YLHRMTTLFCINVLSEV                                           |
| 3C5W           | KDLTIGQMQ                                                   |
| 3CDG           | SEYWDRETRSARDTAQIFRVNLRITLRYG                               |
| 3CFV           | KPAIRRLARR                                                  |
| 3CFV           | KPAIRRLARR                                                  |
| 3CHW           | GGLINKKCYEMASHLRRS                                          |
| 3CJT           | PVGPALGQ                                                    |
| 3CJT           | DPILPGLFDG                                                  |
| 3CJT           | PVGPALGQH                                                   |
| 3CJT           | LPGLFDGG                                                    |
| 3CL3           | HSVQVDQLRMQGSVEAALRMRQAASEEKRLAQLQVAYHQLFQEYDNHKS           |
| 3CM8           | PTLLF                                                       |
| 3CQC           | KEELRKLKQLRESSMLLDQ                                         |
| 3CQC           | FAKKKTLLGLSKLAALAS                                          |
| 3CQC           | SWLHEINS                                                    |
| 3CQX           | KRAVRRRLTACERAKRTL                                          |
| 3CQX           | QKQFQIVIG                                                   |
| 3CQX           | LEDQKKIKRRLETLRNIDNSDKA                                     |
| 3CUQ           | PEFRVQFQDMCATIG                                             |
| 3CUQ           | QMSKQLDMFKTNLEEFASK                                         |
| 3CUQ           | VGDFYYELGVQIEVCLALKHRN                                      |
| 3CUQ           | ISEAFEDLSKLMIAKAKEMVEL                                      |

| A. PDB<br>CODE | M. RESOLUTION |
|----------------|---------------|
| 3BG0           | 3.15          |
| 3BIM           | 2.6           |
| 3BJI           | 2.6           |
| 3BJI           | 2.6           |
| 3BL2           | 2.3           |
| 3BL2           | 2.3           |
| 3BL2           | 2.3           |
| 3BLH           | 2.48          |
| 3BLH           | 2.48          |
| 3BOW           | 2.4           |
| 3BOW           | 2.4           |
| 3BOW           | 2.4           |
| 3BOW           | 2.4           |
| 3BP8           | 2.85          |
| 3BPL           | 2.93          |
| 3BPN           | 3.02          |
| 3BPN           | 3.02          |
| 3BPQ           | 2.2           |
| 3BPQ           | 2.2           |
| 3BPS           | 2.41          |
| 3BPS           | 2.41          |
| 3BRT           | 2.25          |
| 3BRT           | 2.25          |
| 3BRT           | 2.25          |
| 3BRT           | 2.25          |
| 3BRT           | 2.25          |
| 3BRV           | 2.2           |
| 3BUA           | 2.5           |
| 3BUA           | 2.5           |
| 3BUA           | 2.5           |
| 3BUA           | 2.5           |
| 3BXK           | 2.55          |
| 3BXK           | 2.55          |
| 3BZL           | 1.71          |
| 3C3Q           | 2.1           |
| 3C4M           | 1.95          |
| 3C4M           | 1.95          |
| 3C59           | 2.3           |
| 3C5W           | 2.8           |
| 3C5W           | 2.8           |
| 3C5W           | 2.8           |
| 3C5W           | 2.8           |
| 3C5W           | 2.8           |
| 3CDG           | 3.4           |
| 3CFV           | 2.6           |
| 3CFV           | 2.6           |
| 3CHW           | 2.3           |
| 3CJT           | 2.3           |
| 3CJT           | 2.3           |
| 3CJT           | 2.3           |
| 3CJT           | 2.3           |
| 3CJT           | 2.3           |
| 3CL3           | 3.2           |
| 3CM8           | 2.9           |
| 3CQC           | 2.53          |
| 3CQC           | 2.53          |
| 3CQC           | 2.53          |
| 3CQX           | 2.3           |
| 3CQX           | 2.3           |
| 3CQX           | 2.3           |
| 3CUQ           | 2.61          |
| 3CUQ           | 2.61          |
| 3CUQ           | 2.61          |
| 3CUQ           | 2.61          |

| A. PDB CODE | B. INTERFACE CHAINS | C. CHAIN | D. TITLE                                                                               |
|-------------|---------------------|----------|----------------------------------------------------------------------------------------|
| 3CUQ        | A B                 | B        | INTEGRATED STRUCTURAL AND FUNCTIONAL MODEL OF THE HUMAN ESCRT-II COMPLEX               |
| 3CUQ        | B C                 | C        | INTEGRATED STRUCTURAL AND FUNCTIONAL MODEL OF THE HUMAN ESCRT-II COMPLEX               |
| 3CWZ        | A B                 | B        | STRUCTURE OF RAB6(GTP)-R6IP1 COMPLEX                                                   |
| 3D2E        | A B                 | A        | CRYSTAL STRUCTURE OF A COMPLEX OF SSE1P AND HSP70, SELENOMETHIONINE-LABELED CRYSTALS   |
| 3D2E        | C D                 | C        | CRYSTAL STRUCTURE OF A COMPLEX OF SSE1P AND HSP70, SELENOMETHIONINE-LABELED CRYSTALS   |
| 3D32        | A C                 | A        | COMPLEX OF GABA(A) RECEPTOR-ASSOCIATED PROTEIN (GABARAP) WITH A SYNTHETIC PEPTIDE      |
| 3D7V        | A B                 | A        | CRYSTAL STRUCTURE OF MCL-1 IN COMPLEX WITH AN MCL-1 SELECTIVE BH3 LIGAND               |
| 3DBH        | A B                 | A        | STRUCTURAL DISSECTION OF A GATING MECHANISM PREVENTING MISACTIVATION OF UBIQUITIN BY N |
| 3DBH        | A B                 | B        | STRUCTURAL DISSECTION OF A GATING MECHANISM PREVENTING MISACTIVATION OF UBIQUITIN BY N |
| 3DBH        | C D                 | C        | STRUCTURAL DISSECTION OF A GATING MECHANISM PREVENTING MISACTIVATION OF UBIQUITIN BY N |
| 3DBH        | C D                 | C        | STRUCTURAL DISSECTION OF A GATING MECHANISM PREVENTING MISACTIVATION OF UBIQUITIN BY N |
| 3DBH        | C D                 | D        | STRUCTURAL DISSECTION OF A GATING MECHANISM PREVENTING MISACTIVATION OF UBIQUITIN BY N |
| 3DBH        | D J                 | D        | STRUCTURAL DISSECTION OF A GATING MECHANISM PREVENTING MISACTIVATION OF UBIQUITIN BY N |
| 3DBH        | E F                 | E        | STRUCTURAL DISSECTION OF A GATING MECHANISM PREVENTING MISACTIVATION OF UBIQUITIN BY N |
| 3DCG        | B F                 | B        | CRYSTAL STRUCTURE OF THE HIV VIF BC-BOX IN COMPLEX WITH HUMAN ELONGINB AND ELONGINC    |
| 3DCG        | B F                 | F        | CRYSTAL STRUCTURE OF THE HIV VIF BC-BOX IN COMPLEX WITH HUMAN ELONGINB AND ELONGINC    |
| 3DCG        | C D                 | D        | CRYSTAL STRUCTURE OF THE HIV VIF BC-BOX IN COMPLEX WITH HUMAN ELONGINB AND ELONGINC    |
| 3DCT        | A B                 | A        | FXR WITH SRC1 AND GW4064                                                               |
| 3DCT        | A B                 | B        | FXR WITH SRC1 AND GW4064                                                               |
| 3DD7        | A B                 | B        | STRUCTURE OF DOCH66Y IN COMPLEX WITH THE C-TERMINAL DOMAIN OF PHD                      |
| 3DD7        | C D                 | C        | STRUCTURE OF DOCH66Y IN COMPLEX WITH THE C-TERMINAL DOMAIN OF PHD                      |
| 3DD7        | C D                 | C        | STRUCTURE OF DOCH66Y IN COMPLEX WITH THE C-TERMINAL DOMAIN OF PHD                      |
| 3DGC        | L S                 | L        | STRUCTURE OF IL-22/IL-22R1                                                             |
| 3DGC        | M R                 | M        | STRUCTURE OF IL-22/IL-22R1                                                             |
| 3DGE        | A C                 | A        | STRUCTURE OF A HISTIDINE KINASE-RESPONSE REGULATOR COMPLEX REVEALS INSIGHTS INTO TWO-  |
| 3DGE        | A C                 | C        | STRUCTURE OF A HISTIDINE KINASE-RESPONSE REGULATOR COMPLEX REVEALS INSIGHTS INTO TWO-  |
| 3DGE        | B D                 | B        | STRUCTURE OF A HISTIDINE KINASE-RESPONSE REGULATOR COMPLEX REVEALS INSIGHTS INTO TWO-  |
| 3DI2        | A B                 | A        | CRYSTAL STRUCTURE OF THE COMPLEX OF HUMAN INTERLEUKIN-7 WITH UNGLYCOSYLATED HUMAN      |
| 3DI2        | C D                 | C        | CRYSTAL STRUCTURE OF THE COMPLEX OF HUMAN INTERLEUKIN-7 WITH UNGLYCOSYLATED HUMAN      |
| 3DOE        | A B                 | A        | COMPLEX OF ARL2 AND BART, CRYSTAL FORM 1                                               |
| 3DOE        | A B                 | B        | COMPLEX OF ARL2 AND BART, CRYSTAL FORM 1                                               |
| 3DQV        | B D                 | D        | STRUCTURAL INSIGHTS INTO NEDD8 ACTIVATION OF CULLIN-RING LIGASES: CONFORMATIONAL CONT  |
| 3DUH        | A C                 | C        | STRUCTURE OF INTERLEUKIN-23                                                            |
| 3DUH        | B D                 | D        | STRUCTURE OF INTERLEUKIN-23                                                            |
| 3DVE        | A B                 | A        | CRYSTAL STRUCTURE OF CA2+/CAM-CAV2.2 IQ DOMAIN COMPLEX                                 |
| 3DVE        | A B                 | A        | CRYSTAL STRUCTURE OF CA2+/CAM-CAV2.2 IQ DOMAIN COMPLEX                                 |
| 3DVE        | A B                 | A        | CRYSTAL STRUCTURE OF CA2+/CAM-CAV2.2 IQ DOMAIN COMPLEX                                 |
| 3DVE        | A B                 | A        | CRYSTAL STRUCTURE OF CA2+/CAM-CAV2.2 IQ DOMAIN COMPLEX                                 |
| 3DVU        | A C                 | A        | CRYSTAL STRUCTURE OF THE COMPLEX OF MURINE GAMMA- HERPESVIRUS 68 BCL-2 HOMOLOG M11 A   |
| 3DVU        | A C                 | A        | CRYSTAL STRUCTURE OF THE COMPLEX OF MURINE GAMMA- HERPESVIRUS 68 BCL-2 HOMOLOG M11 A   |
| 3DVU        | A C                 | C        | CRYSTAL STRUCTURE OF THE COMPLEX OF MURINE GAMMA- HERPESVIRUS 68 BCL-2 HOMOLOG M11 A   |
| 3DVU        | B D                 | B        | CRYSTAL STRUCTURE OF THE COMPLEX OF MURINE GAMMA- HERPESVIRUS 68 BCL-2 HOMOLOG M11 A   |
| 3DW8        | A B                 | A        | STRUCTURE OF A PROTEIN PHOSPHATASE 2A HOLOENZYME WITH B55 SUBUNIT                      |
| 3DW8        | A B                 | A        | STRUCTURE OF A PROTEIN PHOSPHATASE 2A HOLOENZYME WITH B55 SUBUNIT                      |
| 3DW8        | A C                 | A        | STRUCTURE OF A PROTEIN PHOSPHATASE 2A HOLOENZYME WITH B55 SUBUNIT                      |
| 3DXC        | A B                 | B        | CRYSTAL STRUCTURE OF THE INTRACELLULAR DOMAIN OF HUMAN APP IN COMPLEX WITH FE65-PTB2   |
| 3DXC        | A B                 | B        | CRYSTAL STRUCTURE OF THE INTRACELLULAR DOMAIN OF HUMAN APP IN COMPLEX WITH FE65-PTB2   |
| 3DZU        | A D                 | A        | INTACT PPAR GAMMA - RXR ALPHA NUCLEAR RECEPTOR COMPLEX ON DNA BOUND WITH BVT.13, 9-CIS |
| 3DZU        | A D                 | D        | INTACT PPAR GAMMA - RXR ALPHA NUCLEAR RECEPTOR COMPLEX ON DNA BOUND WITH BVT.13, 9-CIS |
| 3E2K        | A D                 | A        | CRYSTAL STRUCTURE OF THE KPC-2 BETA-LACTAMASE/BETA-LACTAMASE INHIBITOR PROTEIN (BLIP)  |
| 3EA5        | A B                 | A        | KAP95P BINDING INDUCES THE SWITCH LOOPS OF RANGDP TO ADOPT THE GTP-BOUND CONFORMATIO   |
| 3EA5        | A B                 | A        | KAP95P BINDING INDUCES THE SWITCH LOOPS OF RANGDP TO ADOPT THE GTP-BOUND CONFORMATIO   |
| 3EA5        | A B                 | A        | KAP95P BINDING INDUCES THE SWITCH LOOPS OF RANGDP TO ADOPT THE GTP-BOUND CONFORMATIO   |
| 3EA5        | A B                 | B        | KAP95P BINDING INDUCES THE SWITCH LOOPS OF RANGDP TO ADOPT THE GTP-BOUND CONFORMATIO   |
| 3EA5        | A B                 | B        | KAP95P BINDING INDUCES THE SWITCH LOOPS OF RANGDP TO ADOPT THE GTP-BOUND CONFORMATIO   |
| 3EA5        | C D                 | D        | KAP95P BINDING INDUCES THE SWITCH LOOPS OF RANGDP TO ADOPT THE GTP-BOUND CONFORMATIO   |
| 3EAB        | A G                 | A        | CRYSTAL STRUCTURE OF SPASTIN MIT IN COMPLEX WITH ESCRT III                             |
| 3EAB        | A G                 | A        | CRYSTAL STRUCTURE OF SPASTIN MIT IN COMPLEX WITH ESCRT III                             |
| 3EAB        | A G                 | G        | CRYSTAL STRUCTURE OF SPASTIN MIT IN COMPLEX WITH ESCRT III                             |
| 3EAB        | B H                 | B        | CRYSTAL STRUCTURE OF SPASTIN MIT IN COMPLEX WITH ESCRT III                             |
| 3EAB        | D J                 | D        | CRYSTAL STRUCTURE OF SPASTIN MIT IN COMPLEX WITH ESCRT III                             |
| 3EAB        | E K                 | E        | CRYSTAL STRUCTURE OF SPASTIN MIT IN COMPLEX WITH ESCRT III                             |
| 3EAB        | E K                 | K        | CRYSTAL STRUCTURE OF SPASTIN MIT IN COMPLEX WITH ESCRT III                             |

TABLE S4

Jochim, et al

| A. PDB<br>CODE | E. FUNCTION                           | F. $\Delta\Delta G_{\text{AVG,HELIX}}$<br>(KCAL/MOL) | G. $\Delta\Delta G_{\text{SUM,HELIX}}$<br>(KCAL/MOL) | H. # HOTSPOT<br>RESIDUES | I. HELIX<br>LENGTH |
|----------------|---------------------------------------|------------------------------------------------------|------------------------------------------------------|--------------------------|--------------------|
| 3CUQ           | PROTEIN TRANSPORT                     | 1.9                                                  | 3.7                                                  | 2                        | 11                 |
| 3CUQ           | PROTEIN TRANSPORT                     | 1.0                                                  | 2.0                                                  | 2                        | 22                 |
| 3CWZ           | TRANSPORT PROTEIN                     | 1.3                                                  | 2.5                                                  | 2                        | 32                 |
| 3D2E           | CHAPERONE                             | 1.4                                                  | 2.8                                                  | 2                        | 29                 |
| 3D2E           | CHAPERONE                             | 1.4                                                  | 5.6                                                  | 4                        | 29                 |
| 3D32           | TRANSPORT PROTEIN                     | 1.9                                                  | 5.8                                                  | 3                        | 12                 |
| 3D7V           | APOPTOSIS                             | 1.4                                                  | 5.4                                                  | 4                        | 11                 |
| 3DBH           | CELL CYCLE                            | 1.7                                                  | 3.3                                                  | 2                        | 11                 |
| 3DBH           | CELL CYCLE                            | 1.1                                                  | 2.2                                                  | 2                        | 21                 |
| 3DBH           | CELL CYCLE                            | 1.2                                                  | 2.3                                                  | 2                        | 11                 |
| 3DBH           | CELL CYCLE                            | 1.1                                                  | 2.1                                                  | 2                        | 20                 |
| 3DBH           | CELL CYCLE                            | 1.3                                                  | 2.6                                                  | 2                        | 21                 |
| 3DBH           | CELL CYCLE                            | 1.1                                                  | 2.2                                                  | 2                        | 15                 |
| 3DBH           | CELL CYCLE                            | 1.3                                                  | 2.5                                                  | 2                        | 21                 |
| 3DCG           | LIGASE/VIRAL PROTEIN                  | 1.1                                                  | 2.2                                                  | 2                        | 11                 |
| 3DCG           | LIGASE/VIRAL PROTEIN                  | 1.9                                                  | 7.5                                                  | 4                        | 11                 |
| 3DCG           | LIGASE/VIRAL PROTEIN                  | 1.8                                                  | 3.5                                                  | 2                        | 17                 |
| 3DCT           | TRANSCRIPTION/TRANSCRIPTION ACTIVATOR | 1.5                                                  | 2.9                                                  | 2                        | 26                 |
| 3DCT           | TRANSCRIPTION/TRANSCRIPTION ACTIVATOR | 1.3                                                  | 3.9                                                  | 3                        | 9                  |
| 3DD7           | RIBOSOME INHIBITOR                    | 1.8                                                  | 3.6                                                  | 2                        | 6                  |
| 3DD7           | RIBOSOME INHIBITOR                    | 1.2                                                  | 2.4                                                  | 2                        | 16                 |
| 3DD7           | RIBOSOME INHIBITOR                    | 1.7                                                  | 6.9                                                  | 4                        | 16                 |
| 3DGC           | CYTOKINE/SIGNALING PROTEIN            | 1.2                                                  | 2.4                                                  | 2                        | 16                 |
| 3DGC           | CYTOKINE/SIGNALING PROTEIN            | 1.6                                                  | 4.9                                                  | 3                        | 17                 |
| 3DGE           | TRANSFERASE/SIGNALING PROTEIN         | 1.9                                                  | 3.8                                                  | 2                        | 32                 |
| 3DGE           | TRANSFERASE/SIGNALING PROTEIN         | 1.6                                                  | 6.3                                                  | 4                        | 14                 |
| 3DGE           | TRANSFERASE/SIGNALING PROTEIN         | 1.3                                                  | 3.9                                                  | 3                        | 15                 |
| 3DI2           | CYTOKINE/CYTOKINE RECEPTOR            | 1.9                                                  | 3.8                                                  | 2                        | 16                 |
| 3DI2           | CYTOKINE/CYTOKINE RECEPTOR            | 1.9                                                  | 3.7                                                  | 2                        | 17                 |
| 3DOE           | SIGNALING PROTEIN/HYDROLASE           | 1.5                                                  | 3.0                                                  | 2                        | 8                  |
| 3DOE           | SIGNALING PROTEIN/HYDROLASE           | 1.5                                                  | 2.9                                                  | 2                        | 10                 |
| 3DQV           | LIGASE                                | 1.3                                                  | 2.6                                                  | 2                        | 22                 |
| 3DUH           | IMMUNE SYSTEM/CYTOKINE                | 1.2                                                  | 2.3                                                  | 2                        | 31                 |
| 3DUH           | IMMUNE SYSTEM/CYTOKINE                | 1.8                                                  | 3.5                                                  | 2                        | 26                 |
| 3DVE           | MEMBRANE PROTEIN                      | 1.2                                                  | 2.3                                                  | 2                        | 12                 |
| 3DVE           | MEMBRANE PROTEIN                      | 1.6                                                  | 3.2                                                  | 2                        | 15                 |
| 3DVE           | MEMBRANE PROTEIN                      | 1.5                                                  | 4.4                                                  | 3                        | 13                 |
| 3DVE           | MEMBRANE PROTEIN                      | 1.2                                                  | 2.4                                                  | 2                        | 8                  |
| 3DVU           | VIRAL PROTEIN/APOPTOSIS               | 1.8                                                  | 3.5                                                  | 2                        | 25                 |
| 3DVU           | VIRAL PROTEIN/APOPTOSIS               | 1.8                                                  | 3.5                                                  | 2                        | 13                 |
| 3DVU           | VIRAL PROTEIN/APOPTOSIS               | 1.8                                                  | 12.8                                                 | 7                        | 20                 |
| 3DVU           | VIRAL PROTEIN/APOPTOSIS               | 1.8                                                  | 3.6                                                  | 2                        | 23                 |
| 3DW8           | HYDROLASE                             | 1.4                                                  | 2.8                                                  | 2                        | 12                 |
| 3DW8           | HYDROLASE                             | 1.8                                                  | 3.5                                                  | 2                        | 16                 |
| 3DW8           | HYDROLASE                             | 1.5                                                  | 5.8                                                  | 4                        | 17                 |
| 3DXC           | PROTEIN BINDING                       | 1.7                                                  | 5.0                                                  | 3                        | 13                 |
| 3DXC           | PROTEIN BINDING                       | 1.9                                                  | 7.7                                                  | 4                        | 9                  |
| 3DZU           | TRANSCRIPTION/DNA                     | 1.4                                                  | 2.7                                                  | 2                        | 23                 |
| 3DZU           | TRANSCRIPTION/DNA                     | 1.5                                                  | 2.9                                                  | 2                        | 29                 |
| 3E2K           | HYDROLASE/HYDROLASE INHIBITOR         | 1.2                                                  | 2.3                                                  | 2                        | 6                  |
| 3EA5           | TRANSPORT PROTEIN                     | 1.7                                                  | 3.4                                                  | 2                        | 5                  |
| 3EA5           | TRANSPORT PROTEIN                     | 1.0                                                  | 3.0                                                  | 3                        | 14                 |
| 3EA5           | TRANSPORT PROTEIN                     | 1.0                                                  | 3.1                                                  | 3                        | 12                 |
| 3EA5           | TRANSPORT PROTEIN                     | 1.3                                                  | 2.6                                                  | 2                        | 25                 |
| 3EA5           | TRANSPORT PROTEIN                     | 1.3                                                  | 3.9                                                  | 3                        | 13                 |
| 3EA5           | TRANSPORT PROTEIN                     | 1.4                                                  | 2.8                                                  | 2                        | 28                 |
| 3EAB           | CELL CYCLE                            | 1.8                                                  | 3.5                                                  | 2                        | 28                 |
| 3EAB           | CELL CYCLE                            | 1.9                                                  | 5.7                                                  | 3                        | 28                 |
| 3EAB           | CELL CYCLE                            | 1.6                                                  | 4.7                                                  | 3                        | 22                 |
| 3EAB           | CELL CYCLE                            | 1.9                                                  | 3.7                                                  | 2                        | 25                 |
| 3EAB           | CELL CYCLE                            | 1.5                                                  | 4.4                                                  | 3                        | 26                 |
| 3EAB           | CELL CYCLE                            | 1.6                                                  | 4.8                                                  | 3                        | 28                 |
| 3EAB           | CELL CYCLE                            | 1.9                                                  | 11.6                                                 | 6                        | 20                 |

TABLE S4

Jochim, et al

| A. PDB<br>CODE | J. HELIX START<br>RESIDUE # | K. HELIX END<br>RESIDUE # |
|----------------|-----------------------------|---------------------------|
| 3CUQ           | 266                         | 276                       |
| 3CUQ           | 23                          | 44                        |
| 3CWZ           | 718                         | 749                       |
| 3D2E           | 559                         | 587                       |
| 3D2E           | 559                         | 587                       |
| 3D32           | 59                          | 70                        |
| 3D7V           | 244                         | 254                       |
| 3DBH           | 476                         | 486                       |
| 3DBH           | 293                         | 313                       |
| 3DBH           | 476                         | 486                       |
| 3DBH           | 491                         | 510                       |
| 3DBH           | 293                         | 313                       |
| 3DBH           | 148                         | 162                       |
| 3DBH           | 491                         | 511                       |
| 3DCG           | 100                         | 110                       |
| 3DCG           | 145                         | 155                       |
| 3DCG           | 67                          | 83                        |
| 3DCT           | 313                         | 338                       |
| 3DCT           | 747                         | 755                       |
| 3DD7           | 64                          | 69                        |
| 3DD7           | 72                          | 87                        |
| 3DD7           | 6                           | 21                        |
| 3DGC           | 114                         | 129                       |
| 3DGC           | 113                         | 129                       |
| 3DGE           | 285                         | 316                       |
| 3DGE           | 12                          | 25                        |
| 3DGE           | 264                         | 278                       |
| 3DI2           | 74                          | 89                        |
| 3DI2           | 10                          | 26                        |
| 3DOE           | 3                           | 10                        |
| 3DOE           | 107                         | 116                       |
| 3DQV           | 1701                        | 1722                      |
| 3DUH           | 139                         | 169                       |
| 3DUH           | 143                         | 168                       |
| 3DVE           | 118                         | 129                       |
| 3DVE           | 6                           | 20                        |
| 3DVE           | 65                          | 77                        |
| 3DVE           | 138                         | 145                       |
| 3DVU           | 32                          | 56                        |
| 3DVU           | 67                          | 79                        |
| 3DVU           | 107                         | 126                       |
| 3DVU           | 35                          | 57                        |
| 3DW8           | 10                          | 21                        |
| 3DW8           | 179                         | 194                       |
| 3DW8           | 495                         | 511                       |
| 3DXC           | 669                         | 681                       |
| 3DXC           | 685                         | 693                       |
| 3DZU           | 386                         | 408                       |
| 3DZU           | 431                         | 459                       |
| 3E2K           | 107                         | 112                       |
| 3EA5           | 77                          | 81                        |
| 3EA5           | 157                         | 170                       |
| 3EA5           | 101                         | 112                       |
| 3EA5           | 563                         | 587                       |
| 3EA5           | 55                          | 67                        |
| 3EA5           | 280                         | 307                       |
| 3EAB           | 169                         | 196                       |
| 3EAB           | 110                         | 137                       |
| 3EAB           | 175                         | 196                       |
| 3EAB           | 169                         | 193                       |
| 3EAB           | 169                         | 194                       |
| 3EAB           | 169                         | 196                       |
| 3EAB           | 174                         | 193                       |

| A. PDB<br>CODE | L. HELIX SEQUENCE                |
|----------------|----------------------------------|
| 3CUQ           | LTEVYCLVNRA                      |
| 3CUQ           | VDTRQKQLAAWCSLVLSFCRLH           |
| 3CWZ           | VIAQTNWKFVEGLLKECRNKTKRMLVEKMGRE |
| 3D2E           | AQDKLVAETEDRKNTLEEYIYTLRGKLEE    |
| 3D2E           | AQDKLVAETEDRKNTLEEYIYTLRGKLEE    |
| 3D32           | VGQFYFLIRKRI                     |
| 3D7V           | KSLSRVMHVF                       |
| 3DBH           | DDYVHEFCRYG                      |
| 3DBH           | ASTNAVIAAVCATEVFKIATS            |
| 3DBH           | DDYVHEFCRYG                      |
| 3DBH           | HTIAAFLGGAAAQEVIKIIT             |
| 3DBH           | ASTNAVIAAVCATEVFKIATS            |
| 3DBH           | IIARRWINGMLISLL                  |
| 3DBH           | HTIAAFLGGAAAQEVIKIITK            |
| 3DCG           | ALELLMAANFL                      |
| 3DCG           | LQYLALAALIK                      |
| 3DCG           | SHVLSKVCMYFTYKVRY                |
| 3DCT           | HEDQIALLKGSVAEAMFLRSAEIFNK       |
| 3DCT           | QLLRYLLDK                        |
| 3DD7           | DSTNKE                           |
| 3DD7           | NKRTALNSALLFLRRN                 |
| 3DD7           | PEELIALHDANISRYG                 |
| 3DGC           | YMQEVVPFLARLSNRL                 |
| 3DGC           | PYMQEVVPFLARLSNRL                |
| 3DGE           | LSTLKEFLEVIIDQSNHLENLLNELLDfsrLE |
| 3DGE           | AVLRKIVSFNLKKE                   |
| 3DGE           | TPLTAIKAYAETIYN                  |
| 3DI2           | DFDLHLLKVSEGTTIL                 |
| 3DI2           | KQYESVLMVSIQQLLDS                |
| 3DOE           | LLTILKMM                         |
| 3DOE           | DIFDMLLTFT                       |
| 3DQV           | EEENEGIVQLRILRTQEAIQI            |
| 3DUH           | RLLLRFKILRSLQAFVAVAAARVFAHGAATLS |
| 3DUH           | RFKILRSLQAFVAVAAARVFAHGAATL      |
| 3DVE           | DEEVDEMIREAD                     |
| 3DVE           | EEQIAEFKEAFSLFD                  |
| 3DVE           | FPEFLTMMARKMK                    |
| 3DVE           | YEEFVQMM                         |
| 3DVU           | SAVLVDVSKIITLTQEFRRHYDSVY        |
| 3DVU           | WKRDLSKLFTSLF                    |
| 3DVU           | GTMENLSRRLKVTGDLFDIM             |
| 3DVU           | LVDVSKIITLTQEFRRHYDSVYR          |
| 3DW8           | LYPIAVLIDELR                     |
| 3DW8           | PMVRRAAASKLGEFAK                 |
| 3DW8           | YLHRMTTLFCINVLSEV                |
| 3DXC           | PEERHLSKMQQNG                    |
| 3DXC           | PTYKFFEQM                        |
| 3DZU           | PAEVEALREKVYASLEAYCKHKY          |
| 3DZU           | LFakLLQKMTDLRQIVTEHVQLLQVIKKT    |
| 3E2K           | PISEKY                           |
| 3EA5           | DGYIYI                           |
| 3EA5           | FEKPFWLARKLIG                    |
| 3EA5           | VPNWHRDLVRVC                     |
| 3EA5           | LEDAQSLQELQSNILTVLAAVIRKS        |
| 3EA5           | LEGRILAAALTKN                    |
| 3EA5           | DKVASMTVEFWSTICEEEIDIAEYLAQF     |
| 3EAB           | EQCERARRLQAKMMTNLVMakDRLQlle     |
| 3EAB           | SMEAEVRVfHKQAFeyISIALRIDEDE      |
| 3EAB           | SVGTSVASAEQDELSQRLARLR           |
| 3EAB           | EQCERARRLQAKMMTNLVMakDRLQ        |
| 3EAB           | EQCERARRLQAKMMTNLVMakDRLQL       |
| 3EAB           | EQCERARRLQAKMMTNLVMakDRLQlle     |
| 3EAB           | GSVGTsvASAEQDELSQRLA             |

| A. PDB<br>CODE | M. RESOLUTION |
|----------------|---------------|
| 3CUQ           | 2.61          |
| 3CUQ           | 2.61          |
| 3CWZ           | 3.2           |
| 3D2E           | 2.35          |
| 3D2E           | 2.35          |
| 3D32           | 1.3           |
| 3D7V           | 2.03          |
| 3DBH           | 2.85          |
| 3DBH           | 2.85          |
| 3DBH           | 2.85          |
| 3DBH           | 2.85          |
| 3DBH           | 2.85          |
| 3DBH           | 2.85          |
| 3DBH           | 2.85          |
| 3DCG           | 2.4           |
| 3DCG           | 2.4           |
| 3DCG           | 2.4           |
| 3DCT           | 2.5           |
| 3DCT           | 2.5           |
| 3DD7           | 1.7           |
| 3DD7           | 1.7           |
| 3DD7           | 1.7           |
| 3DGC           | 2.5           |
| 3DGC           | 2.5           |
| 3DGE           | 2.8           |
| 3DGE           | 2.8           |
| 3DGE           | 2.8           |
| 3DI2           | 2.7           |
| 3DI2           | 2.7           |
| 3DOE           | 2.25          |
| 3DOE           | 2.25          |
| 3DQV           | 3             |
| 3DUH           | 2.3           |
| 3DUH           | 2.3           |
| 3DVE           | 2.35          |
| 3DVE           | 2.35          |
| 3DVE           | 2.35          |
| 3DVE           | 2.35          |
| 3DVU           | 2.5           |
| 3DVU           | 2.5           |
| 3DVU           | 2.5           |
| 3DVU           | 2.5           |
| 3DW8           | 2.85          |
| 3DW8           | 2.85          |
| 3DW8           | 2.85          |
| 3DXC           | 2.1           |
| 3DXC           | 2.1           |
| 3DZU           | 3.2           |
| 3DZU           | 3.2           |
| 3E2K           | 2.1           |
| 3EA5           | 2.5           |
| 3EA5           | 2.5           |
| 3EA5           | 2.5           |
| 3EA5           | 2.5           |
| 3EA5           | 2.5           |
| 3EAB           | 2.5           |
| 3EAB           | 2.5           |
| 3EAB           | 2.5           |
| 3EAB           | 2.5           |
| 3EAB           | 2.5           |
| 3EAB           | 2.5           |
| 3EAB           | 2.5           |

| A. PDB CODE | B. INTERFACE CHAINS | C. CHAIN | D. TITLE                                                                              |
|-------------|---------------------|----------|---------------------------------------------------------------------------------------|
| 3EAB        | F L                 | F        | CRYSTAL STRUCTURE OF SPASTIN MIT IN COMPLEX WITH ESCRT III                            |
| 3ECH        | A C                 | A        | THE MARR-FAMILY REPRESSOR MEXR IN COMPLEX WITH ITS ANTIREPRESSOR ARM                  |
| 3ECH        | B C                 | B        | THE MARR-FAMILY REPRESSOR MEXR IN COMPLEX WITH ITS ANTIREPRESSOR ARM                  |
| 3ECH        | B C                 | B        | THE MARR-FAMILY REPRESSOR MEXR IN COMPLEX WITH ITS ANTIREPRESSOR ARM                  |
| 3EG5        | A B                 | A        | CRYSTAL STRUCTURE OF MDIA1-TSH GBD-FH3 IN COMPLEX WITH CDC42-GMPPNP                   |
| 3EG5        | A B                 | B        | CRYSTAL STRUCTURE OF MDIA1-TSH GBD-FH3 IN COMPLEX WITH CDC42-GMPPNP                   |
| 3EHU        | A C                 | C        | CRYSTAL STRUCTURE OF THE EXTRACELLULAR DOMAIN OF HUMAN CORTICOTROPIN RELEASING FAC    |
| 3EIQ        | A C                 | C        | CRYSTAL STRUCTURE OF PDCD4-EIF4A                                                      |
| 3EJB        | A B                 | A        | CRYSTAL STRUCTURE OF P450BIOI IN COMPLEX WITH TETRADECANOIC ACID LIGATED ACYL CARRIER |
| 3EUH        | A C                 | A        | CRYSTAL STRUCTURE OF THE MUKE-MUKF COMPLEX                                            |
| 3EUH        | A C                 | A        | CRYSTAL STRUCTURE OF THE MUKE-MUKF COMPLEX                                            |
| 3EUH        | B E                 | B        | CRYSTAL STRUCTURE OF THE MUKE-MUKF COMPLEX                                            |
| 3EUH        | B E                 | E        | CRYSTAL STRUCTURE OF THE MUKE-MUKF COMPLEX                                            |
| 3EX7        | A B                 | A        | THE CRYSTAL STRUCTURE OF EJC IN ITS TRANSITION STATE                                  |
| 3EX7        | E H                 | H        | THE CRYSTAL STRUCTURE OF EJC IN ITS TRANSITION STATE                                  |
| 3EX7        | H I                 | H        | THE CRYSTAL STRUCTURE OF EJC IN ITS TRANSITION STATE                                  |
| 3EZQ        | A B                 | A        | CRYSTAL STRUCTURE OF THE FAS/FADD DEATH DOMAIN COMPLEX                                |
| 3EZQ        | A B                 | B        | CRYSTAL STRUCTURE OF THE FAS/FADD DEATH DOMAIN COMPLEX                                |
| 3EZQ        | E F                 | E        | CRYSTAL STRUCTURE OF THE FAS/FADD DEATH DOMAIN COMPLEX                                |
| 3EZQ        | M N                 | M        | CRYSTAL STRUCTURE OF THE FAS/FADD DEATH DOMAIN COMPLEX                                |
| 3F11        | H S                 | H        | HUMAN ESCRT-0 CORE COMPLEX                                                            |
| 3F11        | H S                 | S        | HUMAN ESCRT-0 CORE COMPLEX                                                            |
| 3F11        | H S                 | S        | HUMAN ESCRT-0 CORE COMPLEX                                                            |
| 3F3P        | B D                 | D        | CRYSTAL STRUCTURE OF A NUCLEOPORIN COMPLEX, SPACE GROUP P21212                        |
| 3F3P        | F H                 | H        | CRYSTAL STRUCTURE OF A NUCLEOPORIN COMPLEX, SPACE GROUP P21212                        |
| 3F5C        | A C                 | A        | STRUCTURE OF DAX-1-LRH-1 COMPLEX                                                      |
| 3F6Q        | A B                 | B        | CRYSTAL STRUCTURE OF INTEGRIN-LINKED KINASE ANKYRIN REPEAT DOMAIN IN COMPLEX WITH PIN |
| 3F75        | A P                 | A        | ACTIVATED TOXOPLASMA GONDII CATHEPSIN L (TGCL) IN COMPLEX WITH ITS PROPEPTIDE         |
| 3F75        | A P                 | P        | ACTIVATED TOXOPLASMA GONDII CATHEPSIN L (TGCL) IN COMPLEX WITH ITS PROPEPTIDE         |
| 3F7P        | A C                 | A        | CRYSTAL STRUCTURE OF A COMPLEX BETWEEN INTEGRIN BETA4 AND PLECTIN                     |
| 3F9K        | A C                 | A        | TWO DOMAIN FRAGMENT OF HIV-2 INTEGRASE IN COMPLEX WITH LEDGF IBD                      |
| 3F9K        | E G                 | E        | TWO DOMAIN FRAGMENT OF HIV-2 INTEGRASE IN COMPLEX WITH LEDGF IBD                      |
| 3F9K        | g i                 | g        | TWO DOMAIN FRAGMENT OF HIV-2 INTEGRASE IN COMPLEX WITH LEDGF IBD                      |
| 3F9K        | I K                 | I        | TWO DOMAIN FRAGMENT OF HIV-2 INTEGRASE IN COMPLEX WITH LEDGF IBD                      |
| 3F9K        | I K                 | K        | TWO DOMAIN FRAGMENT OF HIV-2 INTEGRASE IN COMPLEX WITH LEDGF IBD                      |
| 3F9K        | J K                 | J        | TWO DOMAIN FRAGMENT OF HIV-2 INTEGRASE IN COMPLEX WITH LEDGF IBD                      |
| 3F9K        | M O                 | M        | TWO DOMAIN FRAGMENT OF HIV-2 INTEGRASE IN COMPLEX WITH LEDGF IBD                      |
| 3F9K        | Q S                 | Q        | TWO DOMAIN FRAGMENT OF HIV-2 INTEGRASE IN COMPLEX WITH LEDGF IBD                      |
| 3F9K        | Y a                 | a        | TWO DOMAIN FRAGMENT OF HIV-2 INTEGRASE IN COMPLEX WITH LEDGF IBD                      |
| 3F9K        | Y a                 | Y        | TWO DOMAIN FRAGMENT OF HIV-2 INTEGRASE IN COMPLEX WITH LEDGF IBD                      |
| 3FAL        | A B                 | A        | HUMANRXR ALPHA & MOUSE LXR ALPHA COMPLEXED WITH RETENOIC ACID AND GSK2186             |
| 3FAL        | A B                 | A        | HUMANRXR ALPHA & MOUSE LXR ALPHA COMPLEXED WITH RETENOIC ACID AND GSK2186             |
| 3FAL        | A B                 | B        | HUMANRXR ALPHA & MOUSE LXR ALPHA COMPLEXED WITH RETENOIC ACID AND GSK2186             |
| 3FAL        | A D                 | A        | HUMANRXR ALPHA & MOUSE LXR ALPHA COMPLEXED WITH RETENOIC ACID AND GSK2186             |
| 3FAL        | C B                 | C        | HUMANRXR ALPHA & MOUSE LXR ALPHA COMPLEXED WITH RETENOIC ACID AND GSK2186             |
| 3FAL        | C D                 | C        | HUMANRXR ALPHA & MOUSE LXR ALPHA COMPLEXED WITH RETENOIC ACID AND GSK2186             |
| 3FDL        | A B                 | A        | BIM BH3 PEPTIDE IN COMPLEX WITH BCL-XL                                                |
| 3FHI        | A B                 | A        | CRYSTAL STRUCTURE OF A COMPLEX BETWEEN THE CATALYTIC AND REGULATORY (RI{ALPHA}) SUBU  |
| 3FMO        | A B                 | B        | CRYSTAL STRUCTURE OF THE NUCLEOPORIN NUP214 IN COMPLEX WITH THE DEAD-BOX HELICASE DD: |
| 3FMP        | C D                 | D        | CRYSTAL STRUCTURE OF THE NUCLEOPORIN NUP214 IN COMPLEX WITH THE DEAD-BOX HELICASE DD: |
| 3FSH        | B C                 | C        | CRYSTAL STRUCTURE OF THE UBIQUITIN CONJUGATING ENZYME UBE2G2 BOUND TO THE G2BR DOMAI  |
| 3FUB        | C D                 | C        | CRYSTAL STRUCTURE OF GDNF-GFRALPHA1 COMPLEX                                           |
| 3FWB        | A B                 | A        | SAC3:SUS1:CDC31 COMPLEX                                                               |
| 3FWB        | A B                 | A        | SAC3:SUS1:CDC31 COMPLEX                                                               |
| 3FWB        | A B                 | A        | SAC3:SUS1:CDC31 COMPLEX                                                               |
| 3FWB        | B C                 | C        | SAC3:SUS1:CDC31 COMPLEX                                                               |
| 3FWB        | B C                 | C        | SAC3:SUS1:CDC31 COMPLEX                                                               |
| 3G33        | A D                 | A        | CRYSTAL STRUCTURE OF CDK4/CYCLIN D3                                                   |
| 3G33        | A D                 | D        | CRYSTAL STRUCTURE OF CDK4/CYCLIN D3                                                   |
| 3G33        | C B                 | B        | CRYSTAL STRUCTURE OF CDK4/CYCLIN D3                                                   |
| 3G33        | C B                 | C        | CRYSTAL STRUCTURE OF CDK4/CYCLIN D3                                                   |
| 3G9V        | C D                 | D        | CRYSTAL STRUCTURE OF A SOLUBLE DECOY RECEPTOR IL-22BP BOUND TO INTERLEUKIN-22         |
| 3GCG        | A B                 | A        | CRYSTAL STRUCTURE OF MAP AND CDC42 COMPLEX                                            |



TABLE S4

Jochim, et al

| A. PDB<br>CODE | E. FUNCTION                             | F. $\Delta\Delta G_{\text{AVG,HELIX}}$<br>(KCAL/MOL) | G. $\Delta\Delta G_{\text{SUM,HELIX}}$<br>(KCAL/MOL) | H. # HOTSPOT<br>RESIDUES | I. HELIX<br>LENGTH |
|----------------|-----------------------------------------|------------------------------------------------------|------------------------------------------------------|--------------------------|--------------------|
| 3EAB           | CELL CYCLE                              | 1.8                                                  | 3.6                                                  | 2                        | 25                 |
| 3ECH           | TRANSCRIPTION, TRANSCRIPTION REGULATION | 1.7                                                  | 6.6                                                  | 4                        | 24                 |
| 3ECH           | TRANSCRIPTION, TRANSCRIPTION REGULATION | 1.6                                                  | 4.8                                                  | 3                        | 23                 |
| 3ECH           | TRANSCRIPTION, TRANSCRIPTION REGULATION | 1.2                                                  | 2.3                                                  | 2                        | 13                 |
| 3EG5           | SIGNALING PROTEIN                       | 1.9                                                  | 3.8                                                  | 2                        | 19                 |
| 3EG5           | SIGNALING PROTEIN                       | 1.2                                                  | 2.4                                                  | 2                        | 15                 |
| 3EHU           | MEMBRANE PROTEIN                        | 1.5                                                  | 3.0                                                  | 2                        | 15                 |
| 3EIQ           | HYDROLASE/ANTITUMOR PROTEIN             | 1.2                                                  | 2.4                                                  | 2                        | 10                 |
| 3EJB           | OXIDOREDUCTASE/LIPID TRANSPORT          | 1.5                                                  | 5.9                                                  | 4                        | 14                 |
| 3EUH           | CELL CYCLE                              | 1.5                                                  | 2.9                                                  | 2                        | 40                 |
| 3EUH           | CELL CYCLE                              | 1.6                                                  | 3.2                                                  | 2                        | 12                 |
| 3EUH           | CELL CYCLE                              | 1.8                                                  | 5.5                                                  | 3                        | 40                 |
| 3EUH           | CELL CYCLE                              | 1.4                                                  | 4.2                                                  | 3                        | 15                 |
| 3EX7           | HYDROLASE/RNA BINDING PROTEIN/RNA       | 1.2                                                  | 2.3                                                  | 2                        | 15                 |
| 3EX7           | HYDROLASE/RNA BINDING PROTEIN/RNA       | 1.5                                                  | 2.9                                                  | 2                        | 11                 |
| 3EX7           | HYDROLASE/RNA BINDING PROTEIN/RNA       | 1.3                                                  | 2.6                                                  | 2                        | 14                 |
| 3EZQ           | APOPTOSIS                               | 1.9                                                  | 3.8                                                  | 2                        | 33                 |
| 3EZQ           | APOPTOSIS                               | 1.3                                                  | 3.9                                                  | 3                        | 16                 |
| 3EZQ           | APOPTOSIS                               | 1.5                                                  | 4.5                                                  | 3                        | 15                 |
| 3EZQ           | APOPTOSIS                               | 1.6                                                  | 8.2                                                  | 5                        | 32                 |
| 3F1I           | PROTEIN BINDING                         | 1.5                                                  | 6.0                                                  | 4                        | 26                 |
| 3F1I           | PROTEIN BINDING                         | 1.9                                                  | 5.7                                                  | 3                        | 13                 |
| 3F1I           | PROTEIN BINDING                         | 1.9                                                  | 18.8                                                 | 10                       | 50                 |
| 3F3P           | STRUCTURAL PROTEIN                      | 1.6                                                  | 3.2                                                  | 2                        | 14                 |
| 3F3P           | STRUCTURAL PROTEIN                      | 1.9                                                  | 3.7                                                  | 2                        | 7                  |
| 3F5C           | TRANSCRIPTION                           | 1.5                                                  | 3.0                                                  | 2                        | 18                 |
| 3F6Q           | SIGNALING PROTEIN/SIGNALING PROTEIN     | 1.7                                                  | 6.6                                                  | 4                        | 9                  |
| 3F75           | HYDROLASE                               | 1.4                                                  | 2.8                                                  | 2                        | 5                  |
| 3F75           | HYDROLASE                               | 1.4                                                  | 2.8                                                  | 2                        | 23                 |
| 3F7P           | STRUCTURAL PROTEIN/CELL ADHESION        | 1.4                                                  | 2.7                                                  | 2                        | 19                 |
| 3F9K           | VIRAL PROTEIN, RECOMBINATION            | 1.5                                                  | 4.5                                                  | 3                        | 12                 |
| 3F9K           | VIRAL PROTEIN, RECOMBINATION            | 1.2                                                  | 2.3                                                  | 2                        | 12                 |
| 3F9K           | VIRAL PROTEIN, RECOMBINATION            | 1.7                                                  | 6.8                                                  | 4                        | 12                 |
| 3F9K           | VIRAL PROTEIN, RECOMBINATION            | 1.4                                                  | 4.1                                                  | 3                        | 12                 |
| 3F9K           | VIRAL PROTEIN, RECOMBINATION            | 1.2                                                  | 2.3                                                  | 2                        | 10                 |
| 3F9K           | VIRAL PROTEIN, RECOMBINATION            | 1.7                                                  | 3.3                                                  | 2                        | 11                 |
| 3F9K           | VIRAL PROTEIN, RECOMBINATION            | 1.5                                                  | 4.4                                                  | 3                        | 12                 |
| 3F9K           | VIRAL PROTEIN, RECOMBINATION            | 1.6                                                  | 3.1                                                  | 2                        | 12                 |
| 3F9K           | VIRAL PROTEIN, RECOMBINATION            | 1.2                                                  | 2.4                                                  | 2                        | 15                 |
| 3F9K           | VIRAL PROTEIN, RECOMBINATION            | 1.7                                                  | 3.3                                                  | 2                        | 12                 |
| 3FAL           | SIGNALING PROTEIN                       | 1.7                                                  | 3.4                                                  | 2                        | 18                 |
| 3FAL           | SIGNALING PROTEIN                       | 1.9                                                  | 7.7                                                  | 4                        | 12                 |
| 3FAL           | SIGNALING PROTEIN                       | 1.6                                                  | 6.5                                                  | 4                        | 26                 |
| 3FAL           | SIGNALING PROTEIN                       | 1.5                                                  | 5.9                                                  | 4                        | 8                  |
| 3FAL           | SIGNALING PROTEIN                       | 1.3                                                  | 2.5                                                  | 2                        | 8                  |
| 3FAL           | SIGNALING PROTEIN                       | 1.2                                                  | 2.4                                                  | 2                        | 13                 |
| 3FDL           | APOPTOSIS                               | 1.2                                                  | 3.5                                                  | 3                        | 13                 |
| 3FHI           | TRANSFERASE                             | 1.6                                                  | 3.1                                                  | 2                        | 11                 |
| 3FMO           | ONCOPROTEIN/HYDROLASE                   | 1.8                                                  | 5.5                                                  | 3                        | 11                 |
| 3FMP           | ONCOPROTEIN/HYDROLASE                   | 1.8                                                  | 3.5                                                  | 2                        | 12                 |
| 3FSH           | LIGASE                                  | 1.7                                                  | 6.6                                                  | 4                        | 17                 |
| 3FUB           | HORMONE                                 | 1.1                                                  | 2.1                                                  | 2                        | 11                 |
| 3FWB           | CELL CYCLE, TRANSCRIPTION               | 1.4                                                  | 2.7                                                  | 2                        | 11                 |
| 3FWB           | CELL CYCLE, TRANSCRIPTION               | 1.9                                                  | 9.7                                                  | 5                        | 11                 |
| 3FWB           | CELL CYCLE, TRANSCRIPTION               | 1.9                                                  | 3.7                                                  | 2                        | 13                 |
| 3FWB           | CELL CYCLE, TRANSCRIPTION               | 1.6                                                  | 4.8                                                  | 3                        | 15                 |
| 3FWB           | CELL CYCLE, TRANSCRIPTION               | 1.5                                                  | 4.6                                                  | 3                        | 15                 |
| 3G33           | CELL CYCLE                              | 1.5                                                  | 4.5                                                  | 3                        | 17                 |
| 3G33           | CELL CYCLE                              | 1.4                                                  | 2.8                                                  | 2                        | 15                 |
| 3G33           | CELL CYCLE                              | 1.8                                                  | 3.5                                                  | 2                        | 15                 |
| 3G33           | CELL CYCLE                              | 1.8                                                  | 7.0                                                  | 4                        | 17                 |
| 3G9V           | CYTOKINE/CYTOKINE RECEPTOR              | 1.1                                                  | 4.3                                                  | 4                        | 12                 |
| 3GCC           | SIGNALING PROTEIN/TRANSCRIPTION         | 1.3                                                  | 4.0                                                  | 3                        | 9                  |

TABLE S4

Jochim, et al

| A. PDB<br>CODE | J. HELIX START<br>RESIDUE # | K. HELIX END<br>RESIDUE # |
|----------------|-----------------------------|---------------------------|
| 3EAB           | 169                         | 193                       |
| 3ECH           | 99                          | 122                       |
| 3ECH           | 9                           | 31                        |
| 3ECH           | 37                          | 49                        |
| 3EG5           | 87                          | 105                       |
| 3EG5           | 202                         | 216                       |
| 3EHU           | 27                          | 41                        |
| 3EIQ           | 181                         | 190                       |
| 3EJB           | 57                          | 70                        |
| 3EUH           | 252                         | 291                       |
| 3EUH           | 296                         | 307                       |
| 3EUH           | 247                         | 286                       |
| 3EUH           | 99                          | 113                       |
| 3EX7           | 54                          | 68                        |
| 3EX7           | 386                         | 396                       |
| 3EX7           | 287                         | 300                       |
| 3EZQ           | 287                         | 319                       |
| 3EZQ           | 171                         | 186                       |
| 3EZQ           | 225                         | 239                       |
| 3EZQ           | 287                         | 318                       |
| 3F1I           | 405                         | 430                       |
| 3F1I           | 304                         | 316                       |
| 3F1I           | 327                         | 376                       |
| 3F3P           | 532                         | 545                       |
| 3F3P           | 504                         | 510                       |
| 3F5C           | 525                         | 542                       |
| 3F6Q           | 60                          | 68                        |
| 3F75           | 147                         | 151                       |
| 3F75           | 131                         | 153                       |
| 3F7P           | 157                         | 175                       |
| 3F9K           | 5                           | 16                        |
| 3F9K           | 5                           | 16                        |
| 3F9K           | 5                           | 16                        |
| 3F9K           | 5                           | 16                        |
| 3F9K           | 394                         | 403                       |
| 3F9K           | 124                         | 134                       |
| 3F9K           | 5                           | 16                        |
| 3F9K           | 5                           | 16                        |
| 3F9K           | 348                         | 362                       |
| 3F9K           | 5                           | 16                        |
| 3FAL           | 343                         | 360                       |
| 3FAL           | 421                         | 432                       |
| 3FAL           | 399                         | 424                       |
| 3FAL           | 451                         | 458                       |
| 3FAL           | 451                         | 458                       |
| 3FAL           | 421                         | 433                       |
| 3FDL           | 119                         | 131                       |
| 3FHI           | 243                         | 253                       |
| 3FMO           | 253                         | 263                       |
| 3FMP           | 218                         | 229                       |
| 3FSH           | 582                         | 598                       |
| 3FUB           | 153                         | 163                       |
| 3FWB           | 151                         | 161                       |
| 3FWB           | 115                         | 125                       |
| 3FWB           | 94                          | 106                       |
| 3FWB           | 58                          | 72                        |
| 3FWB           | 38                          | 52                        |
| 3G33           | 56                          | 72                        |
| 3G33           | 24                          | 38                        |
| 3G33           | 24                          | 38                        |
| 3G33           | 56                          | 72                        |
| 3G9V           | 167                         | 178                       |
| 3GCC           | 65                          | 73                        |

| A. PDB<br>CODE | L. HELIX SEQUENCE                                   |
|----------------|-----------------------------------------------------|
| 3EAB           | EQCERARRLQAKMMTNLVMKDRDRLQ                          |
| 3ECH           | DEGLAIHLHAELIMSRVHDELFP                             |
| 3ECH           | LMPALMAVFQHVTRIQSELDCQ                              |
| 3ECH           | PPDVHVHLKLIDEQ                                      |
| 3EG5           | PSSFENVKEKWVPEITHHC                                 |
| 3EG5           | SRNQHEIIRCLKAFM                                     |
| 3EHU           | LAQQAHSNRKLMELI                                     |
| 3EIQ           | TNEVAEMLRD                                          |
| 3EJB           | LDTVELVMALEEEF                                      |
| 3EUH           | LVFDLQSKLDRIISWGQQSIDLWIGYDRHVHKFIRTAIDM            |
| 3EUH           | VFAQRLRQSVQT                                        |
| 3EUH           | HFVDRLVFDLQSKLDRIISWGQQSIDLWIGYDRHVHKFIR            |
| 3EUH           | ELDMMVVGKILCYLYL                                    |
| 3EX7           | KSVMEELKRIIDDSE                                     |
| 3EX7           | IRILRDIEQYY                                         |
| 3EX7           | KRKVDWLTEKMREA                                      |
| 3EZQ           | KKEAYDTLIKDLKKNLCTLAEKIQTIIKLDIT                    |
| 3EZQ           | NLVADLVQEVQQARDL                                    |
| 3EZQ           | SDVDLSKYITTIAGV                                     |
| 3EZQ           | KKEAYDTLIKDLKKNLCTLAEKIQTIIKLDI                     |
| 3F11           | HEQFLKALQNAVTTFVNRMKSNHMRG                          |
| 3F11           | EDKMDQLLQMLQS                                       |
| 3F11           | PELLHLEAMCHQMGPLIDEKLEIDIRKHSELSELVKVMSEALSPLYTKLMN |
| 3F3P           | PEIAKEIYTTLGNQ                                      |
| 3F3P           | IAELLPH                                             |
| 3F5C           | LRAISKQAEDYLYYKHVN                                  |
| 3F6Q           | EHDQMLFA                                            |
| 3F75           | MPFQF                                               |
| 3F75           | EEEKQRRYAIFKNNLVYIHTHNQ                             |
| 3F7P           | PKLTLGLIWTIILHFQISD                                 |
| 3F9K           | IEPAQEEHEKYYH                                       |
| 3F9K           | IEPAQEEHEKYYH                                       |
| 3F9K           | IEPAQEEHEKYYH                                       |
| 3F9K           | IEPAQEEHEKYYH                                       |
| 3F9K           | TEMITTLKKI                                          |
| 3F9K           | QEVKMWVAVWIG                                        |
| 3F9K           | IEPAQEEHEKYYH                                       |
| 3F9K           | IEPAQEEHEKYYH                                       |
| 3F9K           | MDSRLQRIHAEIKNS                                     |
| 3F9K           | IEPAQEEHEKYYH                                       |
| 3FAL           | GAIFDRVLTELVSKMRDM                                  |
| 3FAL           | RLPALRSIGLKCC                                       |
| 3FAL           | PLMFPRMLMKLVSLRTLSSVHSEQVF                          |
| 3FAL           | FLMEMLEA                                            |
| 3FAL           | FLMEMLEA                                            |
| 3FAL           | RLPALRSIGLKCC                                       |
| 3FDL           | AYQSFEQVVNELF                                       |
| 3FHI           | PIQIYEKIVSG                                         |
| 3FMO           | HQDQSIRIQRM                                         |
| 3FMP           | PGTVLDWCSKLLK                                       |
| 3FSH           | LVQRKDELLQQARKRFL                                   |
| 3FUB           | NCLDAAKACNL                                         |
| 3FWB           | ENEFIAICTDS                                         |
| 3FWB           | IKNLRRVAKEL                                         |
| 3FWB           | PLDEIKRAFQLFD                                       |
| 3FWB           | FTQILSTVEPKALEM                                     |
| 3FWB           | WVDKVKDLTKSEMNI                                     |
| 3G33           | ISTVREVALLRLEAFE                                    |
| 3G33           | DQRVLQSLLRLEERY                                     |
| 3G33           | DQRVLQSLLRLEERY                                     |
| 3G33           | ISTVREVALLRLEAFE                                    |
| 3G9V           | LDLLFMSLRNAC                                        |
| 3GCC           | DRLRPLSYP                                           |

| A. PDB<br>CODE | M. RESOLUTION |
|----------------|---------------|
| 3EAB           | 2.5           |
| 3ECH           | 1.8           |
| 3ECH           | 1.8           |
| 3ECH           | 1.8           |
| 3EG5           | 2.7           |
| 3EG5           | 2.7           |
| 3EHU           | 1.96          |
| 3EIQ           | 3.5           |
| 3EJB           | 2             |
| 3EUH           | 2.9           |
| 3EUH           | 2.9           |
| 3EUH           | 2.9           |
| 3EUH           | 2.9           |
| 3EX7           | 2.3           |
| 3EX7           | 2.3           |
| 3EX7           | 2.3           |
| 3EZQ           | 2.73          |
| 3EZQ           | 2.73          |
| 3EZQ           | 2.73          |
| 3EZQ           | 2.73          |
| 3F11           | 2.3           |
| 3F11           | 2.3           |
| 3F11           | 2.3           |
| 3F3P           | 3.2           |
| 3F3P           | 3.2           |
| 3F5C           | 3             |
| 3F6Q           | 1.6           |
| 3F75           | 1.99          |
| 3F75           | 1.99          |
| 3F7P           | 2.75          |
| 3F9K           | 3.2           |
| 3F9K           | 3.2           |
| 3F9K           | 3.2           |
| 3F9K           | 3.2           |
| 3F9K           | 3.2           |
| 3F9K           | 3.2           |
| 3F9K           | 3.2           |
| 3F9K           | 3.2           |
| 3F9K           | 3.2           |
| 3F9K           | 3.2           |
| 3F9K           | 3.2           |
| 3FAL           | 2.36          |
| 3FAL           | 2.36          |
| 3FAL           | 2.36          |
| 3FAL           | 2.36          |
| 3FAL           | 2.36          |
| 3FAL           | 2.36          |
| 3FDL           | 1.78          |
| 3FHI           | 2             |
| 3FMO           | 2.51          |
| 3FMP           | 3.19          |
| 3FSH           | 2.76          |
| 3FUB           | 2.35          |
| 3FWB           | 2.5           |
| 3FWB           | 2.5           |
| 3FWB           | 2.5           |
| 3FWB           | 2.5           |
| 3FWB           | 2.5           |
| 3G33           | 3             |
| 3G33           | 3             |
| 3G33           | 3             |
| 3G33           | 3             |
| 3G9V           | 2.76          |
| 3GCC           | 2.3           |

| A. PDB CODE | B. INTERFACE CHAINS | C. CHAIN | D. TITLE                                                                                  |
|-------------|---------------------|----------|-------------------------------------------------------------------------------------------|
| 3GCG        | A B                 | B        | CRYSTAL STRUCTURE OF MAP AND CDC42 COMPLEX                                                |
| 3GJX        | B A                 | A        | CRYSTAL STRUCTURE OF THE NUCLEAR EXPORT COMPLEX CRM1- SNURPORTIN1-RANGTP                  |
| 3GJX        | C A                 | A        | CRYSTAL STRUCTURE OF THE NUCLEAR EXPORT COMPLEX CRM1- SNURPORTIN1-RANGTP                  |
| 3GJX        | C A                 | A        | CRYSTAL STRUCTURE OF THE NUCLEAR EXPORT COMPLEX CRM1- SNURPORTIN1-RANGTP                  |
| 3GJX        | C A                 | C        | CRYSTAL STRUCTURE OF THE NUCLEAR EXPORT COMPLEX CRM1- SNURPORTIN1-RANGTP                  |
| 3GJX        | F D                 | D        | CRYSTAL STRUCTURE OF THE NUCLEAR EXPORT COMPLEX CRM1- SNURPORTIN1-RANGTP                  |
| 3GJX        | F D                 | F        | CRYSTAL STRUCTURE OF THE NUCLEAR EXPORT COMPLEX CRM1- SNURPORTIN1-RANGTP                  |
| 3GM1        | A E                 | E        | CRYSTAL STRUCTURE OF THE FOCAL ADHESION TARGETING (FAT) DOMAIN OF PYK2 IN COMPLEX WITH    |
| 3GM1        | A F                 | A        | CRYSTAL STRUCTURE OF THE FOCAL ADHESION TARGETING (FAT) DOMAIN OF PYK2 IN COMPLEX WITH    |
| 3GM1        | A F                 | A        | CRYSTAL STRUCTURE OF THE FOCAL ADHESION TARGETING (FAT) DOMAIN OF PYK2 IN COMPLEX WITH    |
| 3GM1        | A F                 | F        | CRYSTAL STRUCTURE OF THE FOCAL ADHESION TARGETING (FAT) DOMAIN OF PYK2 IN COMPLEX WITH    |
| 3GM1        | B C                 | C        | CRYSTAL STRUCTURE OF THE FOCAL ADHESION TARGETING (FAT) DOMAIN OF PYK2 IN COMPLEX WITH    |
| 3GM1        | B D                 | D        | CRYSTAL STRUCTURE OF THE FOCAL ADHESION TARGETING (FAT) DOMAIN OF PYK2 IN COMPLEX WITH    |
| 3GMW        | C D                 | C        | CRYSTAL STRUCTURE OF BETA-LACTAMSE INHIBITORY PROTEIN-I (BLIP-I) IN COMPLEX WITH TEM-1 BE |
| 3GNI        | A B                 | A        | STRUCTURE OF STRAD AND MO25                                                               |
| 3GNI        | A B                 | A        | STRUCTURE OF STRAD AND MO25                                                               |
| 3GNI        | A B                 | A        | STRUCTURE OF STRAD AND MO25                                                               |
| 3H11        | A B                 | A        | ZYMOGEN CASPASE-8:C-FLIPL PROTEASE DOMAIN COMPLEX                                         |
| 3H11        | A B                 | B        | ZYMOGEN CASPASE-8:C-FLIPL PROTEASE DOMAIN COMPLEX                                         |
| 3H4S        | A E                 | A        | STRUCTURE OF THE COMPLEX OF A MITOTIC KINESIN WITH ITS CALCIUM BINDING REGULATOR          |
| 3H4S        | A E                 | E        | STRUCTURE OF THE COMPLEX OF A MITOTIC KINESIN WITH ITS CALCIUM BINDING REGULATOR          |
| 3H6P        | A C                 | A        | CRYSTAL STRUCTURE OF RV3019C-RV3020C FROM MYCOBACTERIUM TUBERCULOSIS                      |
| 3H6P        | A D                 | A        | CRYSTAL STRUCTURE OF RV3019C-RV3020C FROM MYCOBACTERIUM TUBERCULOSIS                      |
| 3H6P        | A D                 | D        | CRYSTAL STRUCTURE OF RV3019C-RV3020C FROM MYCOBACTERIUM TUBERCULOSIS                      |
| 3H6P        | B C                 | B        | CRYSTAL STRUCTURE OF RV3019C-RV3020C FROM MYCOBACTERIUM TUBERCULOSIS                      |
| 3H6P        | B D                 | B        | CRYSTAL STRUCTURE OF RV3019C-RV3020C FROM MYCOBACTERIUM TUBERCULOSIS                      |
| 3H6P        | B D                 | D        | CRYSTAL STRUCTURE OF RV3019C-RV3020C FROM MYCOBACTERIUM TUBERCULOSIS                      |
| 3H9R        | A B                 | A        | CRYSTAL STRUCTURE OF THE KINASE DOMAIN OF TYPE I ACTIVIN RECEPTOR (ACVR1) IN COMPLEX WI   |
| 3HD7        | A B                 | A        | HELICAL EXTENSION OF THE NEURONAL SNARE COMPLEX INTO THE MEMBRANE, SPACEGROUP C 1 2 1     |
| 3HD7        | A B                 | A        | HELICAL EXTENSION OF THE NEURONAL SNARE COMPLEX INTO THE MEMBRANE, SPACEGROUP C 1 2 1     |
| 3HD7        | A B                 | B        | HELICAL EXTENSION OF THE NEURONAL SNARE COMPLEX INTO THE MEMBRANE, SPACEGROUP C 1 2 1     |
| 3HD7        | A D                 | A        | HELICAL EXTENSION OF THE NEURONAL SNARE COMPLEX INTO THE MEMBRANE, SPACEGROUP C 1 2 1     |
| 3HD7        | B C                 | B        | HELICAL EXTENSION OF THE NEURONAL SNARE COMPLEX INTO THE MEMBRANE, SPACEGROUP C 1 2 1     |
| 3HD7        | B C                 | C        | HELICAL EXTENSION OF THE NEURONAL SNARE COMPLEX INTO THE MEMBRANE, SPACEGROUP C 1 2 1     |
| 3HD7        | C D                 | C        | HELICAL EXTENSION OF THE NEURONAL SNARE COMPLEX INTO THE MEMBRANE, SPACEGROUP C 1 2 1     |
| 3HD7        | C D                 | D        | HELICAL EXTENSION OF THE NEURONAL SNARE COMPLEX INTO THE MEMBRANE, SPACEGROUP C 1 2 1     |
| 3HD7        | E F                 | E        | HELICAL EXTENSION OF THE NEURONAL SNARE COMPLEX INTO THE MEMBRANE, SPACEGROUP C 1 2 1     |
| 3HD7        | E F                 | E        | HELICAL EXTENSION OF THE NEURONAL SNARE COMPLEX INTO THE MEMBRANE, SPACEGROUP C 1 2 1     |
| 3HD7        | E F                 | F        | HELICAL EXTENSION OF THE NEURONAL SNARE COMPLEX INTO THE MEMBRANE, SPACEGROUP C 1 2 1     |
| 3HD7        | E H                 | E        | HELICAL EXTENSION OF THE NEURONAL SNARE COMPLEX INTO THE MEMBRANE, SPACEGROUP C 1 2 1     |
| 3HD7        | E H                 | E        | HELICAL EXTENSION OF THE NEURONAL SNARE COMPLEX INTO THE MEMBRANE, SPACEGROUP C 1 2 1     |
| 3HD7        | E H                 | H        | HELICAL EXTENSION OF THE NEURONAL SNARE COMPLEX INTO THE MEMBRANE, SPACEGROUP C 1 2 1     |
| 3HD7        | F G                 | F        | HELICAL EXTENSION OF THE NEURONAL SNARE COMPLEX INTO THE MEMBRANE, SPACEGROUP C 1 2 1     |
| 3HD7        | F G                 | G        | HELICAL EXTENSION OF THE NEURONAL SNARE COMPLEX INTO THE MEMBRANE, SPACEGROUP C 1 2 1     |
| 3HD7        | G H                 | H        | HELICAL EXTENSION OF THE NEURONAL SNARE COMPLEX INTO THE MEMBRANE, SPACEGROUP C 1 2 1     |
| 3HGK        | C G                 | G        | CRYSTAL STRUCTURE OF EFFECT PROTEIN AVRPTOB COMPLEXED WITH KINASE PTO                     |
| 3HH2        | A D                 | D        | CRYSTAL STRUCTURE OF THE MYOSTATIN:FOLLISTATIN 288 COMPLEX                                |
| 3HHR        | A B                 | A        | HUMAN GROWTH HORMONE AND EXTRACELLULAR DOMAIN OF ITS RECEPTOR: CRYSTAL STRUCTURE          |
| 3HHZ        | C M                 | M        | COMPLEX OF THE VESICULAR STOMATITIS VIRUS NUCLEOCAPSID AND THE NUCLEOCAPSID-BINDING I     |
| 3HKI        | D E                 | D        | CRYSTAL STRUCTURE OF MURINE THROMBIN MUTANT W215A/E217A IN COMPLEX WITH THE EXTRACE       |
| 3HO5        | B H                 | B        | CRYSTAL STRUCTURE OF HEDGEHOG-INTERACTING PROTEIN (HHIP) AND SONIC HEDGEHOG (SHH) COM     |
| 3HUJ        | A G                 | A        | CRYSTAL STRUCTURE OF HUMAN CD1D-ALPHA-GALACTOSYL CERAMIDE IN COMPLEX WITH SEMI-INV        |
| 3HUJ        | G H                 | H        | CRYSTAL STRUCTURE OF HUMAN CD1D-ALPHA-GALACTOSYL CERAMIDE IN COMPLEX WITH SEMI-INV        |
| 3I1H        | A B                 | A        | CRYSTAL STRUCTURE OF HUMAN BFL-1 IN COMPLEX WITH BAK BH3 PEPTIDE                          |
| 3I1H        | A B                 | B        | CRYSTAL STRUCTURE OF HUMAN BFL-1 IN COMPLEX WITH BAK BH3 PEPTIDE                          |

(a) PDB code of predicted target. (b) Chains in the complex featuring a helix at the interface. (c) Candidate helix to be mimicked for mutating two or more key residues in the helix at the interface to alanine. (g)  $\Delta\Delta G_{\text{sum/helix}}$  is derived from Rosetta co-arse-grained scoring. (j) First residue of the candidate helix segment. (k) Last residue of the candidate helix segment. (l) Sequence of candidate helix segment.

TABLE S4

Jochim, et al

| A. PDB<br>CODE | E. FUNCTION                           | F. $\Delta\Delta G_{\text{AVG,HELIX}}$<br>(KCAL/MOL) | G. $\Delta\Delta G_{\text{SUM,HELIX}}$<br>(KCAL/MOL) | H. # HOTSPOT<br>RESIDUES | I. HELIX<br>LENGTH |
|----------------|---------------------------------------|------------------------------------------------------|------------------------------------------------------|--------------------------|--------------------|
| 3GCG           | SIGNALING PROTEIN/TRANSCRIPTION       | 1.3                                                  | 2.6                                                  | 2                        | 28                 |
| 3GJX           | PROTEIN TRANSPORT                     | 1.9                                                  | 3.8                                                  | 2                        | 22                 |
| 3GJX           | PROTEIN TRANSPORT                     | 1.5                                                  | 2.9                                                  | 2                        | 20                 |
| 3GJX           | PROTEIN TRANSPORT                     | 1.1                                                  | 2.2                                                  | 2                        | 18                 |
| 3GJX           | PROTEIN TRANSPORT                     | 1.5                                                  | 4.4                                                  | 3                        | 6                  |
| 3GJX           | PROTEIN TRANSPORT                     | 1.2                                                  | 2.4                                                  | 2                        | 18                 |
| 3GJX           | PROTEIN TRANSPORT                     | 1.5                                                  | 3.0                                                  | 2                        | 6                  |
| 3GM1           | TRANSFERASE                           | 1.3                                                  | 3.9                                                  | 3                        | 9                  |
| 3GM1           | TRANSFERASE                           | 1.6                                                  | 8.2                                                  | 5                        | 28                 |
| 3GM1           | TRANSFERASE                           | 1.4                                                  | 2.7                                                  | 2                        | 31                 |
| 3GM1           | TRANSFERASE                           | 1.8                                                  | 3.5                                                  | 2                        | 6                  |
| 3GM1           | TRANSFERASE                           | 1.8                                                  | 5.4                                                  | 3                        | 10                 |
| 3GM1           | TRANSFERASE                           | 1.7                                                  | 5.0                                                  | 3                        | 10                 |
| 3GMW           | PROTEIN BINDING                       | 1.6                                                  | 3.1                                                  | 2                        | 5                  |
| 3GNI           | SIGNALING PROTEIN/SIGNALING PROTEIN   | 1.4                                                  | 2.8                                                  | 2                        | 16                 |
| 3GNI           | SIGNALING PROTEIN/SIGNALING PROTEIN   | 1.3                                                  | 2.6                                                  | 2                        | 10                 |
| 3GNI           | SIGNALING PROTEIN/SIGNALING PROTEIN   | 1.5                                                  | 2.9                                                  | 2                        | 16                 |
| 3H11           | APOPTOSIS                             | 1.3                                                  | 5.2                                                  | 4                        | 17                 |
| 3H11           | APOPTOSIS                             | 1.2                                                  | 3.6                                                  | 3                        | 14                 |
| 3H4S           | MOTOR PROTEIN/CALCIUM BINDING PROTEIN | 1.8                                                  | 5.3                                                  | 3                        | 21                 |
| 3H4S           | MOTOR PROTEIN/CALCIUM BINDING PROTEIN | 1.2                                                  | 3.5                                                  | 3                        | 19                 |
| 3H6P           | STRUCTURAL GENOMICS, UNKNOWN FUNCTION | 1.7                                                  | 5.1                                                  | 3                        | 58                 |
| 3H6P           | STRUCTURAL GENOMICS, UNKNOWN FUNCTION | 1.7                                                  | 8.5                                                  | 5                        | 58                 |
| 3H6P           | STRUCTURAL GENOMICS, UNKNOWN FUNCTION | 1.7                                                  | 8.3                                                  | 5                        | 23                 |
| 3H6P           | STRUCTURAL GENOMICS, UNKNOWN FUNCTION | 1.8                                                  | 9.1                                                  | 5                        | 63                 |
| 3H6P           | STRUCTURAL GENOMICS, UNKNOWN FUNCTION | 1.7                                                  | 3.3                                                  | 2                        | 63                 |
| 3H6P           | STRUCTURAL GENOMICS, UNKNOWN FUNCTION | 1.7                                                  | 8.7                                                  | 5                        | 20                 |
| 3H9R           | ISOMERASE/PROTEIN KINASE              | 1.3                                                  | 2.6                                                  | 2                        | 9                  |
| 3HD7           | EXOCYTOSIS                            | 1.3                                                  | 4.0                                                  | 3                        | 44                 |
| 3HD7           | EXOCYTOSIS                            | 1.5                                                  | 6.0                                                  | 4                        | 41                 |
| 3HD7           | EXOCYTOSIS                            | 1.6                                                  | 9.6                                                  | 6                        | 95                 |
| 3HD7           | EXOCYTOSIS                            | 1.4                                                  | 2.8                                                  | 2                        | 41                 |
| 3HD7           | EXOCYTOSIS                            | 1.6                                                  | 16.3                                                 | 10                       | 95                 |
| 3HD7           | EXOCYTOSIS                            | 1.6                                                  | 11.3                                                 | 7                        | 61                 |
| 3HD7           | EXOCYTOSIS                            | 1.2                                                  | 6.2                                                  | 5                        | 61                 |
| 3HD7           | EXOCYTOSIS                            | 1.3                                                  | 5.2                                                  | 4                        | 47                 |
| 3HD7           | EXOCYTOSIS                            | 1.6                                                  | 14.8                                                 | 9                        | 41                 |
| 3HD7           | EXOCYTOSIS                            | 1.8                                                  | 10.7                                                 | 6                        | 41                 |
| 3HD7           | EXOCYTOSIS                            | 1.7                                                  | 20.5                                                 | 12                       | 96                 |
| 3HD7           | EXOCYTOSIS                            | 1.3                                                  | 2.5                                                  | 2                        | 41                 |
| 3HD7           | EXOCYTOSIS                            | 1.3                                                  | 2.6                                                  | 2                        | 41                 |
| 3HD7           | EXOCYTOSIS                            | 1.4                                                  | 2.7                                                  | 2                        | 54                 |
| 3HD7           | EXOCYTOSIS                            | 1.3                                                  | 8.0                                                  | 6                        | 96                 |
| 3HD7           | EXOCYTOSIS                            | 1.6                                                  | 3.1                                                  | 2                        | 52                 |
| 3HD7           | EXOCYTOSIS                            | 1.6                                                  | 4.8                                                  | 3                        | 54                 |
| 3HGK           | TRANSFERASE                           | 1.2                                                  | 2.4                                                  | 2                        | 5                  |
| 3HH2           | SIGNALING PROTEIN/CYTOKINE            | 1.4                                                  | 2.7                                                  | 2                        | 10                 |
| 3HHR           | HORMONE/RECEPTOR                      | 1.3                                                  | 2.6                                                  | 2                        | 31                 |
| 3HHZ           | VIRAL PROTEIN/RNA                     | 1.6                                                  | 3.1                                                  | 2                        | 11                 |
| 3HKI           | HYDROLASE                             | 1.8                                                  | 7.2                                                  | 4                        | 10                 |
| 3HO5           | SIGNALING PROTEIN                     | 1.1                                                  | 2.2                                                  | 2                        | 6                  |
| 3HUJ           | IMMUNE SYSTEM                         | 1.6                                                  | 3.1                                                  | 2                        | 29                 |
| 3HUJ           | IMMUNE SYSTEM                         | 1.9                                                  | 3.7                                                  | 2                        | 5                  |
| 3I1H           | APOPTOSIS                             | 1.9                                                  | 5.8                                                  | 3                        | 22                 |
| 3I1H           | APOPTOSIS                             | 1.8                                                  | 5.4                                                  | 3                        | 14                 |

icked is part of the indicated chain. (d) Title of PDB entry. (e) Function of protein complex (f)  $\Delta\Delta G_{\text{avg/helix}}$  is derived from Rosetta computational alanine mutagenesis studies and indicates the average free energy penalty for mutating two or more key residues at the interface to be mimicked. (m) Resolution of PDB structure (NOT APP indicates NMR structure).

TABLE S4

Jochim, et al

| A. PDB<br>CODE | J. HELIX START<br>RESIDUE # | K. HELIX END<br>RESIDUE # |
|----------------|-----------------------------|---------------------------|
| 3GCG           | 72                          | 99                        |
| 3GJX           | 510                         | 531                       |
| 3GJX           | 314                         | 333                       |
| 3GJX           | 124                         | 141                       |
| 3GJX           | 137                         | 142                       |
| 3GJX           | 124                         | 141                       |
| 3GJX           | 137                         | 142                       |
| 3GM1           | 266                         | 274                       |
| 3GM1           | 903                         | 930                       |
| 3GM1           | 933                         | 963                       |
| 3GM1           | 268                         | 273                       |
| 3GM1           | 265                         | 274                       |
| 3GM1           | 264                         | 273                       |
| 3GMW           | 107                         | 111                       |
| 3GNI           | 92                          | 107                       |
| 3GNI           | 299                         | 308                       |
| 3GNI           | 223                         | 238                       |
| 3H11           | 439                         | 455                       |
| 3H11           | 424                         | 437                       |
| 3H4S           | 1222                        | 1242                      |
| 3H4S           | 96                          | 114                       |
| 3H6P           | 18                          | 75                        |
| 3H6P           | 18                          | 75                        |
| 3H6P           | 51                          | 73                        |
| 3H6P           | 15                          | 77                        |
| 3H6P           | 15                          | 77                        |
| 3H6P           | 21                          | 40                        |
| 3H9R           | 198                         | 206                       |
| 3HD7           | 70                          | 113                       |
| 3HD7           | 29                          | 69                        |
| 3HD7           | 190                         | 284                       |
| 3HD7           | 29                          | 69                        |
| 3HD7           | 190                         | 284                       |
| 3HD7           | 18                          | 78                        |
| 3HD7           | 18                          | 78                        |
| 3HD7           | 139                         | 185                       |
| 3HD7           | 70                          | 110                       |
| 3HD7           | 29                          | 69                        |
| 3HD7           | 189                         | 284                       |
| 3HD7           | 70                          | 110                       |
| 3HD7           | 29                          | 69                        |
| 3HD7           | 147                         | 200                       |
| 3HD7           | 189                         | 284                       |
| 3HD7           | 29                          | 80                        |
| 3HD7           | 147                         | 200                       |
| 3HGK           | 176                         | 180                       |
| 3HH2           | 43                          | 52                        |
| 3HHR           | 155                         | 185                       |
| 3HHZ           | 375                         | 385                       |
| 3HKI           | 14                          | 14                        |
| 3HO5           | 376                         | 381                       |
| 3HUI           | 60                          | 88                        |
| 3HUI           | 135                         | 139                       |
| 3I1H           | 86                          | 107                       |
| 3I1H           | 74                          | 87                        |

putational alanine mutagenesis studies  
 ce to alanine. (h) Number of hot spot re

| A. PDB CODE | L. HELIX SEQUENCE                                                                               |
|-------------|-------------------------------------------------------------------------------------------------|
| 3GCG        | QQWFQQEQTTYISRTVNRLLDDYCRSNN                                                                    |
| 3GJX        | EEDEKRFLVTVIKDLLGLCEQK                                                                          |
| 3GJX        | DEQNFIQNLSLFLCTFLKEH                                                                            |
| 3GJX        | KVYIGKLNMLVQILKQE                                                                               |
| 3GJX        | VFHRKK                                                                                          |
| 3GJX        | KVYIGKLNMLVQILKQE                                                                               |
| 3GJX        | VFHRKK                                                                                          |
| 3GM1        | LDELMASLS                                                                                       |
| 3GM1        | PEGYVVVVKNVGLTLRKLIGSVDDLPS                                                                     |
| 3GM1        | SSSRTEIEGTQKLLNKDLAELINKMRLAQQN                                                                 |
| 3GM1        | ELMASL                                                                                          |
| 3GM1        | ELDELMASLS                                                                                      |
| 3GM1        | RELDELMASL                                                                                      |
| 3GMW        | PVTEK                                                                                           |
| 3GNI        | FEGKKDVAQIFNNILR                                                                                |
| 3GNI        | QAKLIEFLSK                                                                                      |
| 3GNI        | YVTKRQSLKLLGELL                                                                                 |
| 3H11        | LLDLHIELNGYMYDWNS                                                                               |
| 3H11        | ILTILTEVNYEVS                                                                                   |
| 3H4S        | EMVRLKLVAYWKEQAGKKGE                                                                            |
| 3H4S        | QTEFCVLMVRLSPEMMEDA                                                                             |
| 3H6P        | FAAKAGLMRHTIGQAEQQAMSAQAFHQGESAAAFQGAHARFVAAAAKVNTLLDIAQAN                                      |
| 3H6P        | FAAKAGLMRHTIGQAEQQAMSAQAFHQGESAAAFQGAHARFVAAAAKVNTLLDIAQAN                                      |
| 3H6P        | YQGWTQWNQALEDLVRAYSMS                                                                           |
| 3H6P        | HTAFAAKAGLMRHTIGQAEQQAMSAQAFHQGESAAAFQGAHARFVAAAAKVNTLLDIAQANLG                                 |
| 3H6P        | HTAFAAKAGLMRHTIGQAEQQAMSAQAFHQGESAAAFQGAHARFVAAAAKVNTLLDIAQANLG                                 |
| 3H6P        | YAGTLQSLGADIASEQAVLS                                                                            |
| 3H9R        | FLVQRTVAR                                                                                       |
| 3HD7        | LQAGASQFETSAAKLRKYWWKNLKMMLGVICAILIIIVY                                                         |
| 3HD7        | MRRLQQTQAQVDEVVDIMRVNVDKVLERDQKLELDDRADA                                                        |
| 3HD7        | QALSEIETRHSEIIKLENSIRELHDMFMDMAMLVESQGEMIDRIEYNVEHAVDYVERAVSDTKKAVKYQSKARRKKIMIIICCIVLGIIASTIG  |
| 3HD7        | MRRLQQTQAQVDEVVDIMRVNVDKVLERDQKLELDDRADA                                                        |
| 3HD7        | QALSEIETRHSEIIKLENSIRELHDMFMDMAMLVESQGEMIDRIEYNVEHAVDYVERAVSDTKKAVKYQSKARRKKIMIIICCIVLGIIASTIG  |
| 3HD7        | ADQLADESLESTRMLQLVEESKDAGIRTLVMLDEQGEQLDRVEEGMNHINQDMKEAEKNL                                    |
| 3HD7        | ADQLADESLESTRMLQLVEESKDAGIRTLVMLDEQGEQLDRVEEGMNHINQDMKEAEKNL                                    |
| 3HD7        | HMARENEMDENLEQVSGIIGNLRHMALDMGNEIDTQNRQIDRIMEKA                                                 |
| 3HD7        | LQAGASQFETSAAKLRKYWWKNLKMMLGVICAILIII                                                           |
| 3HD7        | MRRLQQTQAQVDEVVDIMRVNVDKVLERDQKLELDDRADA                                                        |
| 3HD7        | KQALSEIETRHSEIIKLENSIRELHDMFMDMAMLVESQGEMIDRIEYNVEHAVDYVERAVSDTKKAVKYQSKARRKKIMIIICCIVLGIIASTIG |
| 3HD7        | LQAGASQFETSAAKLRKYWWKNLKMMLGVICAILIII                                                           |
| 3HD7        | MRRLQQTQAQVDEVVDIMRVNVDKVLERDQKLELDDRADA                                                        |
| 3HD7        | DENLEQVSGIIGNLRHMALDMGNEIDTQNRQIDRIMEKADSNKTRIDEANQRAT                                          |
| 3HD7        | KQALSEIETRHSEIIKLENSIRELHDMFMDMAMLVESQGEMIDRIEYNVEHAVDYVERAVSDTKKAVKYQSKARRKKIMIIICCIVLGIIASTIG |
| 3HD7        | TRRMLQLVEESKDAGIRTLVMLDEQGEQLDRVEEGMNHINQDMKEAEKNLKD                                            |
| 3HD7        | DENLEQVSGIIGNLRHMALDMGNEIDTQNRQIDRIMEKADSNKTRIDEANQRAT                                          |
| 3HGK        | MPMHG                                                                                           |
| 3HH2        | DNTLFWMIF                                                                                       |
| 3HHR        | ALLKNYGLLYCFRKDMDKVETFLRIVQCRSV                                                                 |
| 3HHZ        | VVEWLGWFEDQ                                                                                     |
| 3HKI        | EKELDSYID                                                                                       |
| 3HO5        | LDDMEE                                                                                          |
| 3HUI        | DQQWETLQHIFRVYRSSFTRDVKEFAKML                                                                   |
| 3HUI        | EAEIS                                                                                           |
| 3I1H        | WGRIVTIFAFEGILIKLLRQQ                                                                           |
| 3I1H        | VGRQLAIGDDINR                                                                                   |

and indicates the average free energy penalty  
sidues in helix. (i) Length of candidate helix to be mimicked



| A. PDB<br>CODE | M. RESOLUTION |
|----------------|---------------|
| 3GCG           | 2.3           |
| 3GJX           | 2.5           |
| 3GJX           | 2.5           |
| 3GJX           | 2.5           |
| 3GJX           | 2.5           |
| 3GJX           | 2.5           |
| 3GJX           | 2.5           |
| 3GM1           | 2.95          |
| 3GM1           | 2.95          |
| 3GM1           | 2.95          |
| 3GM1           | 2.95          |
| 3GM1           | 2.95          |
| 3GM1           | 2.95          |
| 3GMW           | 2.1           |
| 3GNI           | 2.35          |
| 3GNI           | 2.35          |
| 3GNI           | 2.35          |
| 3H11           | 1.9           |
| 3H11           | 1.9           |
| 3H4S           | 2.4           |
| 3H4S           | 2.4           |
| 3H6P           | 1.91          |
| 3H6P           | 1.91          |
| 3H6P           | 1.91          |
| 3H6P           | 1.91          |
| 3H6P           | 1.91          |
| 3H6P           | 1.91          |
| 3H9R           | 2.35          |
| 3HD7           | 3.4           |
| 3HD7           | 3.4           |
| 3HD7           | 3.4           |
| 3HD7           | 3.4           |
| 3HD7           | 3.4           |
| 3HD7           | 3.4           |
| 3HD7           | 3.4           |
| 3HD7           | 3.4           |
| 3HD7           | 3.4           |
| 3HD7           | 3.4           |
| 3HD7           | 3.4           |
| 3HD7           | 3.4           |
| 3HD7           | 3.4           |
| 3HD7           | 3.4           |
| 3HD7           | 3.4           |
| 3HD7           | 3.4           |
| 3HD7           | 3.4           |
| 3HD7           | 3.4           |
| 3HD7           | 3.4           |
| 3HD7           | 3.4           |
| 3HGK           | 3.3           |
| 3HH2           | 2.15          |
| 3HHR           | 2.8           |
| 3HHZ           | 3.5           |
| 3HKI           | 2.2           |
| 3HO5           | 3.01          |
| 3HUI           | 2.5           |
| 3HUI           | 2.5           |
| 3I1H           | 2.2           |
| 3I1H           | 2.2           |

## **Table S5.** Full Dataset of HIPP interactions

### Description of Entries

- A. PDB code of predicted target.
- B. Title of PDB entry.
- C. PDB Classification and function of protein complex.

TABLE S5

| A. PDB Code | B. Title                                                                                                   | C. Classification                        |
|-------------|------------------------------------------------------------------------------------------------------------|------------------------------------------|
| 10GS        | HUMAN GLUTATHIONE S-TRANSFERASE P1-1, COMPLEX WITH TER117                                                  | COMPLEX (TRANSFERASE/INHIBITOR)          |
| 1A00        | HEMOGLOBIN (VAL BETA1 MET, TRP BETA37 TYR) MUTANT                                                          | OXYGEN TRANSPORT                         |
| 1A01        | HEMOGLOBIN (VAL BETA1 MET, TRP BETA37 ALA) MUTANT                                                          | OXYGEN TRANSPORT                         |
| 1A02        | STRUCTURE OF THE DNA BINDING DOMAINS OF NFAT, FOS AND JUN BOUND TO DNA                                     | TRANSCRIPTION/DNA                        |
| 1A07        | C-SRC (SH2 DOMAIN) COMPLEXED WITH ACE-MALONYL TYR-GLU-(N,N-DIPENTYL AMINE)                                 | COMPLEX (TRANSFERASE/PEPTIDE)            |
| 1A08        | C-SRC (SH2 DOMAIN) COMPLEXED WITH ACE-DIFLUORO PHOSPHOTYR-GLU-(N,N-DIPENTYL AMINE)                         | COMPLEX (TRANSFERASE/PEPTIDE)            |
| 1A09        | C-SRC (SH2 DOMAIN) COMPLEXED WITH ACE-FORMYL PHOSPHOTYR-GLU-(N,N-DIPENTYL AMINE)                           | COMPLEX (TRANSFERASE/PEPTIDE)            |
| 1A1A        | C-SRC (SH2 DOMAIN WITH C188A MUTATION) COMPLEXED WITH ACE-FORMYL PHOSPHOTYR-GLU-(N,N-DIPENTYL AMINE)       | COMPLEX (TRANSFERASE/PEPTIDE)            |
| 1A1B        | C-SRC (SH2 DOMAIN) COMPLEXED WITH ACE-PHOSPHOTYR-GLU-(N,N-DIPENTYL AMINE)                                  | COMPLEX (TRANSFERASE/PEPTIDE)            |
| 1A1C        | C-SRC (SH2 DOMAIN) COMPLEXED WITH ACE-PHOSPHOTYR-GLU-(N-ME-(CH <sub>2</sub> ) <sub>3</sub> -CYCLOPENTYL))  | COMPLEX (TRANSFERASE/PEPTIDE)            |
| 1A1E        | C-SRC (SH2 DOMAIN) COMPLEXED WITH ACE-PHOSPHOTYR-GLU-(3-BUTYLPYPERIDINE)                                   | COMPLEX (TRANSFERASE/PEPTIDE)            |
| 1A1M        | MHC CLASS I MOLECULE B*5301 COMPLEXED WITH PEPTIDE TPYDINQML FROM GAG PROTEIN OF HIV2                      | COMPLEX (ANTIGEN/PEPTIDE)                |
| 1A1N        | MHC CLASS I MOLECULE B*3501 COMPLEXED WITH PEPTIDE VPLRPMTY FROM THE NEF PROTEIN (75-82) OF HIV1           | COMPLEX (ANTIGEN/PEPTIDE)                |
| 1A1O        | MHC CLASS I MOLECULE B*5301 COMPLEXED WITH PEPTIDE LS6 (KPIVQYDNF) FROM THE MALARIA PARASITE P. FALCIPARUM | COMPLEX (ANTIGEN/PEPTIDE)                |
| 1A1R        | HCV NS3 PROTEASE DOMAIN: NS4A PEPTIDE COMPLEX                                                              | VIRAL PROTEIN                            |
| 1A22        | HUMAN GROWTH HORMONE BOUND TO SINGLE RECEPTOR                                                              | COMPLEX (HORMONE/RECEPTOR)               |
| 1A2C        | STRUCTURE OF THROMBIN INHIBITED BY AERUGINOSIN298-A FROM A BLUE-GREEN ALGA                                 | COMPLEX (SERINE PROTEASE/INHIBITOR)      |
| 1A2K        | GDPRAN-NTF2 COMPLEX                                                                                        | COMPLEX (TRANSPORT/NUCLEAR PROTEIN)      |
| 1A2X        | COMPLEX OF TROPONIN C WITH A 47 RESIDUE (1-47) FRAGMENT OF TROPONIN I                                      | COMPLEX (SKELETAL MUSCLE/MUSCLE PROTEIN) |
| 1A2Y        | HEN EGG WHITE LYSOZYME, D18A MUTANT, IN COMPLEX WITH MOUSE MONOCLONAL ANTIBODY D1.3                        | COMPLEX (IMMUNOGLOBULIN/HYDROLASE)       |
| 1A30        | HIV-1 PROTEASE COMPLEXED WITH A TRIPEPTIDE INHIBITOR                                                       | COMPLEX (ASPARTIC PROTEASE/INHIBITOR)    |
| 1A37        | 14-3-3 PROTEIN ZETA BOUND TO PS-RAF259 PEPTIDE                                                             | COMPLEX (SIGNAL TRANSDUCTION/PEPTIDE)    |
| 1A38        | 14-3-3 PROTEIN ZETA BOUND TO R18 PEPTIDE                                                                   | COMPLEX (SIGNAL TRANSDUCTION/PEPTIDE)    |
| 1A3B        | COMPLEX OF HUMAN ALPHA-THROMBIN WITH THE BIFUNCTIONAL BORONATE INHIBITOR BOROLOG1                          | COMPLEX (SERINE PROTEASE/INHIBITOR)      |
| 1A3E        | COMPLEX OF HUMAN ALPHA-THROMBIN WITH THE BIFUNCTIONAL                                                      | COMPLEX (SERINE PROTEASE/INHIBITOR)      |

## BORONATE INHIBITOR BOROLOG2

|      |                                                                                                                                                                                                           |                                      |
|------|-----------------------------------------------------------------------------------------------------------------------------------------------------------------------------------------------------------|--------------------------------------|
| 1A3L | CATALYSIS OF A DISFAVORED REACTION: AN ANTIBODY EXO DIELS-ALDERASE-TSA-INHIBITOR COMPLEX AT 1.95 Å RESOLUTION                                                                                             | IMMUNOGLOBULIN                       |
| 1A3N | DEOXY HUMAN HEMOGLOBIN                                                                                                                                                                                    | OXYGEN TRANSPORT                     |
| 1A3O | ARTIFICIAL MUTANT (ALPHA Y42H) OF DEOXY HEMOGLOBIN                                                                                                                                                        | OXYGEN TRANSPORT                     |
| 1A3R | FAB FRAGMENT (ANTIBODY 8F5) COMPLEXED WITH PEPTIDE FROM HUMAN RHINOVIRUS (SEROTYPE 2) VIRAL CAPSID PROTEIN VP2 (RESIDUES 156-170)                                                                         | VIRAL PROTEIN/IMMUNE SYSTEM          |
| 1A46 | THROMBIN COMPLEXED WITH HIRUGEN AND A BETA-STRAND MIMETIC INHIBITOR                                                                                                                                       | COMPLEX (SERINE PROTEASE/INHIBITOR)  |
| 1A4F | BAR-HEADED GOOSE HEMOGLOBIN (OXY FORM)                                                                                                                                                                    | OXYGEN TRANSPORT                     |
| 1A4J | DIELS ALDER CATALYTIC ANTIBODY GERMLINE PRECURSOR                                                                                                                                                         | IMMUNOGLOBULIN                       |
| 1A4K | DIELS ALDER CATALYTIC ANTIBODY WITH TRANSITION STATE ANALOGUE                                                                                                                                             | IMMUNOGLOBULIN                       |
| 1A4W | CRYSTAL STRUCTURES OF THROMBIN WITH THIAZOLE-CONTAINING INHIBITORS: PROBES OF THE S1' BINDING SITE                                                                                                        | COMPLEX (SERINE PROTEASE/INHIBITORS) |
| 1A4Y | RIBONUCLEASE INHIBITOR-ANGIOGENIN COMPLEX                                                                                                                                                                 | COMPLEX (INHIBITOR/NUCLEASE)         |
| 1A5A | CRYO-CRYSTALLOGRAPHY OF A TRUE SUBSTRATE, INDOLE-3-GLYCEROL PHOSPHATE, BOUND TO A MUTANT (ALPHA D60N) TRYPTOPHAN SYNTHASE ALPHA2BETA2 COMPLEX REVEALS THE CORRECT ORIENTATION OF ACTIVE SITE ALPHA GLU 49 | LYASE                                |
| 1A5B | CRYO-CRYSTALLOGRAPHY OF A TRUE SUBSTRATE, INDOLE-3-GLYCEROL PHOSPHATE, BOUND TO A MUTANT (ALPHA D60N) TRYPTOPHAN SYNTHASE ALPHA2BETA2 COMPLEX REVEALS THE CORRECT ORIENTATION OF ACTIVE SITE ALPHA GLU 49 | LYASE                                |
| 1A5F | FAB FRAGMENT OF A MONOCLONAL ANTI-E-SELECTIN ANTIBODY                                                                                                                                                     | IMMUNOGLOBULIN                       |
| 1A5G | HUMAN THROMBIN COMPLEXED WITH NOVEL SYNTHETIC PEPTIDE MIMETIC INHIBITOR AND HIRUGEN                                                                                                                       | COMPLEX (SERINE PROTEASE/INHIBITOR)  |
| 1A5K | K217E VARIANT OF KLEBSIELLA AEROGENES UREASE                                                                                                                                                              | HYDROLASE                            |
| 1A5L | K217C VARIANT OF KLEBSIELLA AEROGENES UREASE                                                                                                                                                              | HYDROLASE                            |
| 1A5M | K217A VARIANT OF KLEBSIELLA AEROGENES UREASE                                                                                                                                                              | HYDROLASE                            |
| 1A5N | K217A VARIANT OF KLEBSIELLA AEROGENES UREASE, CHEMICALLY RESCUED BY FORMATE AND NICKEL                                                                                                                    | HYDROLASE                            |
| 1A5O | K217C VARIANT OF KLEBSIELLA AEROGENES UREASE, CHEMICALLY RESCUED BY FORMATE AND NICKEL                                                                                                                    | HYDROLASE                            |
| 1A5S | CRYSTAL STRUCTURE OF WILD-TYPE TRYPTOPHAN SYNTHASE COMPLEXED WITH 5-FLUOROINDOLE PROPANOL PHOSPHATE AND L-SER BOUND AS AMINO ACRYLATE TO THE BETA SITE                                                    | COMPLEX (LYASE/INHIBITOR)            |
| 1A61 | THROMBIN COMPLEXED WITH A BETA-MIMETIC THIAZOLE-CONTAINING INHIBITOR                                                                                                                                      | COMPLEX (SERINE PROTEASE/INHIBITOR)  |
| 1A6A | THE STRUCTURE OF AN INTERMEDIATE IN CLASS II MHC MATURATION: CLIP BOUND TO HLA-DR3                                                                                                                        | COMPLEX (TRANSMEMBRANE/GLYCOPROTEIN) |

|      |                                                                                                                                                                                                                  |                                     |
|------|------------------------------------------------------------------------------------------------------------------------------------------------------------------------------------------------------------------|-------------------------------------|
| 1A6D | THERMOSOME FROM T. ACIDOPHILUM                                                                                                                                                                                   | CHAPERONIN                          |
| 1A6E | THERMOSOME-MG-ADP-ALF3 COMPLEX                                                                                                                                                                                   | CHAPERONIN                          |
| 1A6T | FAB FRAGMENT OF MAB1-1A MONOCLONAL ANTIBODY TO HUMAN RHINOVIRUS 14 NIM-1A SITE                                                                                                                                   | IMMUNOGLOBULIN                      |
| 1A6Z | HFE (HUMAN) HEMOCHROMATOSIS PROTEIN                                                                                                                                                                              | MHC CLASS I COMPLEX                 |
| 1A81 | CRYSTAL STRUCTURE OF THE TANDEM SH2 DOMAIN OF THE SYK KINASE BOUND TO A DUALY TYROSINE-PHOSPHORYLATED ITAM                                                                                                       | COMPLEX (TRANSFERASE/PEPTIDE)       |
| 1A8G | HIV-1 PROTEASE IN COMPLEX WITH SDZ283-910                                                                                                                                                                        | COMPLEX (ACID PROTEINASE/INHIBITOR) |
| 1A8K | CRYSTALLOGRAPHIC ANALYSIS OF HUMAN IMMUNODEFICIENCY VIRUS 1 PROTEASE WITH AN ANALOG OF THE CONSERVED CA-P2 SUBSTRATE: INTERACTIONS WITH FREQUENTLY OCCURRING GLUTAMIC ACID RESIDUE AT P2' POSITION OF SUBSTRATES | COMPLEX (ASPARTYL PROTEASE/PEPTIDE) |
| 1A93 | NMR SOLUTION STRUCTURE OF THE C-MYC-MAX HETERODIMERIC LEUCINE ZIPPER, NMR, MINIMIZED AVERAGE STRUCTURE                                                                                                           | LEUCINE ZIPPER                      |
| 1A94 | STRUCTURAL BASIS FOR SPECIFICITY OF RETROVIRAL PROTEASES                                                                                                                                                         | COMPLEX (ASPARTYL PROTEASE/PEPTIDE) |
| 1A9B | DECAMER-LIKE CONFORMATION OF A NANO-PEPTIDE BOUND TO HLA-B3501 DUE TO NONSTANDARD POSITIONING OF THE C-TERMINUS                                                                                                  | COMPLEX (MHC CLASS I/PEPTIDE)       |
| 1A9E | DECAMER-LIKE CONFORMATION OF A NANO-PEPTIDE BOUND TO HLA-B3501 DUE TO NONSTANDARD POSITIONING OF THE C-TERMINUS                                                                                                  | COMPLEX (MHC CLASS I/PEPTIDE)       |
| 1A9N | CRYSTAL STRUCTURE OF THE SPLICEOSOMAL U2B"-U2A' PROTEIN COMPLEX BOUND TO A FRAGMENT OF U2 SMALL NUCLEAR RNA                                                                                                      | RNA BINDING PROTEIN/RNA             |
| 1A9X | CARBAMOYL PHOSPHATE SYNTHETASE: CAUGHT IN THE ACT OF GLUTAMINE HYDROLYSIS                                                                                                                                        | AMIDOTRANSFERASE                    |
| 1AA1 | ACTIVATED SPINACH RUBISCO IN COMPLEX WITH THE PRODUCT 3-PHOSPHOGLYCERATE                                                                                                                                         | OXIDOREDUCTASE                      |
| 1AB9 | CRYSTAL STRUCTURE OF BOVINE GAMMA-CHYMOTRYPSIN                                                                                                                                                                   | COMPLEX (SERINE PROTEASE/PEPTIDE)   |
| 1ABI | STRUCTURE OF THE HIRULOG 3-THROMBIN COMPLEX AND NATURE OF THE S' SUBSITES OF SUBSTRATES AND INHIBITORS                                                                                                           | HYDROLASE(SERINE PROTEINASE)        |
| 1ABJ | STRUCTURE OF THE HIRULOG 3-THROMBIN COMPLEX AND NATURE OF THE S' SUBSITES OF SUBSTRATES AND INHIBITORS                                                                                                           | HYDROLASE(SERINE PROTEINASE)        |
| 1ABR | CRYSTAL STRUCTURE OF ABRIN-A                                                                                                                                                                                     | COMPLEX (GLYCOSIDASE/CARBOHYDRATE)  |
| 1ABW | DEOXY RHB1.1 (RECOMBINANT HEMOGLOBIN)                                                                                                                                                                            | COMPLEX (OXYGEN TRANSPORT/PEPTIDE)  |
| 1ABY | CYANOMET RHB1.1 (RECOMBINANT HEMOGLOBIN)                                                                                                                                                                         | OXYGEN TRANSPORT                    |
| 1ACB | CRYSTAL AND MOLECULAR STRUCTURE OF THE BOVINE ALPHA-CHYMOTRYPSIN-EGLIN C COMPLEX AT 2.0 ANGSTROMS RESOLUTION                                                                                                     | HYDROLASE(SERINE PROTEASE)          |
| 1ACM | ARGININE 54 IN THE ACTIVE SITE OF ESCHERICHIA COLI ASPARTATE TRANSCARBAMOYLASE IS CRITICAL FOR CATALYSIS: A SITE-SPECIFIC MUTAGENESIS, NMR AND X-RAY CRYSTALLOGRAPHY STUDY                                       | TRANSFERASE (CARBAMOYL-P,ASPARTATE) |
| 1ACY | CRYSTAL STRUCTURE OF THE PRINCIPAL NEUTRALIZING SITE OF HIV-1                                                                                                                                                    | COMPLEX(ANTIBODY/HIV-1 FRAGMENT)    |
| 1AD0 | FAB FRAGMENT OF ENGINEERED HUMAN MONOCLONAL ANTIBODY A5B7                                                                                                                                                        | IMMUNOGLOBULIN                      |

|      |                                                                                                                              |                                         |
|------|------------------------------------------------------------------------------------------------------------------------------|-----------------------------------------|
| 1AD8 | COMPLEX OF THROMBIN WITH AND INHIBITOR CONTAINING A NOVEL P1 MOIETY                                                          | COMPLEX (SERINE PROTEASE/INHIBITOR)     |
| 1AD9 | IGG-FAB FRAGMENT OF ENGINEERED HUMAN MONOCLONAL ANTIBODY CTM01                                                               | IMMUNOGLOBULIN                          |
| 1ADQ | CRYSTAL STRUCTURE OF A HUMAN IGM RHEUMATOID FACTOR FAB IN COMPLEX WITH ITS AUTOANTIGEN IGG FC                                | COMPLEX (IMMUNOGLOBULIN/AUTOANTIGEN)    |
| 1AE6 | IGG-FAB FRAGMENT OF MOUSE MONOCLONAL ANTIBODY CTM01                                                                          | IMMUNOGLOBULIN                          |
| 1AF0 | SERRATIA PROTEASE IN COMPLEX WITH INHIBITOR                                                                                  | COMPLEX (METALLOPROTEASE/INHIBITOR)     |
| 1AFQ | CRYSTAL STRUCTURE OF BOVINE GAMMA-CHYMOTRYPSIN COMPLEXED WITH A SYNTHETIC INHIBITOR                                          | COMPLEX (SERINE PROTEASE/INHIBITOR)     |
| 1AFV | HIV-1 CAPSID PROTEIN (P24) COMPLEX WITH FAB25.3                                                                              | VIRAL PROTEIN/IMMUNE SYSTEM             |
| 1AGB | ANTAGONIST HIV-1 GAG PEPTIDES INDUCE STRUCTURAL CHANGES IN HLA B8-HIV-1 GAG PEPTIDE (GGRKKYKL-3R MUTATION)                   | HISTOCOMPATIBILITY COMPLEX              |
| 1AGC | ANTAGONIST HIV-1 GAG PEPTIDES INDUCE STRUCTURAL CHANGES IN HLA B8-HIV-1 GAG PEPTIDE (GGKKYQL-7Q MUTATION)                    | HISTOCOMPATIBILITY COMPLEX              |
| 1AGD | ANTAGONIST HIV-1 GAG PEPTIDES INDUCE STRUCTURAL CHANGES IN HLA B8-HIV-1 GAG PEPTIDE (GGKKYKL-INDEX PEPTIDE)                  | HISTOCOMPATIBILITY COMPLEX              |
| 1AGF | ANTAGONIST HIV-1 GAG PEPTIDES INDUCE STRUCTURAL CHANGES IN HLA B8-HIV-1 GAG PEPTIDE (GGKKRYKL-5R MUTATION)                   | HISTOCOMPATIBILITY COMPLEX              |
| 1AGR | COMPLEX OF ALF4-ACTIVATED GI-ALPHA-1 WITH RGS4                                                                               | COMPLEX (SIGNAL TRANSDUCTION/REGULATOR) |
| 1AHG | ASPARTATE AMINOTRANSFERASE HEXAMUTANT                                                                                        | TRANSFERASE (AMINOTRANSFERASE)          |
| 1AHJ | NITRILE HYDRATASE                                                                                                            | LYASE                                   |
| 1AHW | A COMPLEX OF EXTRACELLULAR DOMAIN OF TISSUE FACTOR WITH AN INHIBITORY FAB (5G9)                                              | COMPLEX (IMMUNOGLOBULIN/TISSUE FACTOR)  |
| 1AI1 | HIV-1 V3 LOOP MIMIC                                                                                                          | COMPLEX (ANTIBODY/PEPTIDE)              |
| 1AI4 | PENICILLIN ACYLASE COMPLEXED WITH 3,4-DIHYDROXYPHENYLACETIC ACID                                                             | ANTIBIOTIC RESISTANCE                   |
| 1AI5 | PENICILLIN ACYLASE COMPLEXED WITH M-NITROPHENYLACETIC ACID                                                                   | ANTIBIOTIC RESISTANCE                   |
| 1AI6 | PENICILLIN ACYLASE WITH P-HYDROXYPHENYLACETIC ACID                                                                           | ANTIBIOTIC RESISTANCE                   |
| 1AI7 | PENICILLIN ACYLASE COMPLEXED WITH PHENOL                                                                                     | ANTIBIOTIC RESISTANCE                   |
| 1AI8 | HUMAN ALPHA-THROMBIN TERNARY COMPLEX WITH THE EXOSITE INHIBITOR HIRUGEN AND ACTIVE SITE INHIBITOR PHCH2OCO-D-DPA-PRO-BOROMPG | COMPLEX (BLOOD COAGULATION/INHIBITOR)   |
| 1AIF | ANTI-IDIOTYPIC FAB 409.5.3 (IGG2A) FAB FROM MOUSE                                                                            | IMMUNOGLOBULIN                          |
| 1AIG | HOTOSYNTHETIC REACTION CENTER FROM RHODOBACTER SPHAEROIDES IN THE D+QB-CHARGE SEPARATED STATE                                | PHOTOSYNTHETIC REACTION CENTER          |
| 1AIJ | HOTOSYNTHETIC REACTION CENTER FROM RHODOBACTER SPHAEROIDES IN THE CHARGE-NEUTRAL DQAQB STATE                                 | PHOTOSYNTHETIC REACTION CENTER          |
| 1AIK | HIV GP41 CORE STRUCTURE                                                                                                      | VIRAL PROTEIN                           |

|      |                                                                                                                                                   |                                         |
|------|---------------------------------------------------------------------------------------------------------------------------------------------------|-----------------------------------------|
| 1AIP | EF-TU EF-TS COMPLEX FROM THERMUS THERMOPHILUS                                                                                                     | COMPLEX OF TWO ELONGATION FACTORS       |
| 1AIX | HUMAN ALPHA-THROMBIN TERNARY COMPLEX WITH EXOSITE INHIBITOR HIRUGEN AND ACTIVE SITE INHIBITOR PHCH2OCO-D-DPA-PRO-BOROVAL                          | COMPLEX (BLOOD COAGULATION/INHIBITOR)   |
| 1AJ9 | R-STATE HUMAN CARBONMONOXYHEMOGLOBIN ALPHA-A53S                                                                                                   | OXYGEN TRANSPORT                        |
| 1AJP | PENICILLIN ACYLASE COMPLEXED WITH 2,5-DIHYDROXYPHENYLACETIC ACID                                                                                  | ANTIBIOTIC RESISTANCE                   |
| 1AJQ | PENICILLIN ACYLASE COMPLEXED WITH THIOPHENEACETIC ACID                                                                                            | ANTIBIOTIC RESISTANCE                   |
| 1AJS | REFINEMENT AND COMPARISON OF THE CRYSTAL STRUCTURES OF PIG CYTOSOLIC ASPARTATE AMINOTRANSFERASE AND ITS COMPLEX WITH 2-METHYLASPARTATE            | AMINOTRANSFERASE                        |
| 1AK4 | HUMAN CYCLOPHILIN A BOUND TO THE AMINO-TERMINAL DOMAIN OF HIV-1 CAPSID                                                                            | VIRAL PROTEIN/ISOMERASE                 |
| 1AKJ | COMPLEX OF THE HUMAN MHC CLASS I GLYCOPROTEIN HLA-A2 AND THE T CELL CORECEPTOR CD8                                                                | COMPLEX (MHC I/PEPTIDE/CD8)             |
| 1AKS | CRYSTAL STRUCTURE OF THE FIRST ACTIVE AUTOLYSATE FORM OF THE PORCINE ALPHA TRYPSIN                                                                | SERINE PROTEASE                         |
| 1AL0 | PROCAPSID OF BACTERIOPHAGE PHIX174                                                                                                                | VIRUS                                   |
| 1ALL | ALLOPHYCOCYANIN                                                                                                                                   | LIGHT-HARVESTING PROTEIN                |
| 1AM4 | COMPLEX BETWEEN CDC42HS.GMPPNP AND P50 RHOGAP (H. SAPIENS)                                                                                        | COMPLEX (GTPASE-ACTIVATING/GTP-BINDING) |
| 1AO7 | COMPLEX BETWEEN HUMAN T-CELL RECEPTOR, VIRAL PEPTIDE (TAX), AND HLA-A 0201                                                                        | COMPLEX (MHC/VIRAL PEPTIDE/RECEPTOR)    |
| 1AOI | COMPLEX BETWEEN NUCLEOSOME CORE PARTICLE (H3,H4,H2A,H2B) AND 146 BP LONG DNA FRAGMENT                                                             | DNA BINDING PROTEIN/DNA                 |
| 1AOK | VIPOXIN COMPLEX                                                                                                                                   | HYDROLASE                               |
| 1AON | CRYSTAL STRUCTURE OF THE ASYMMETRIC CHAPERONIN COMPLEX GROEL/GROES/(ADP)7                                                                         | COMPLEX (GROEL/GROES)                   |
| 1AOT | NMR STRUCTURE OF THE FYN SH2 DOMAIN COMPLEXED WITH A PHOSPHOTYROSYL PEPTIDE, MINIMIZED AVERAGE STRUCTURE                                          | COMPLEX (PROTO-ONCOGENE/EARLY PROTEIN)  |
| 1AP2 | SINGLE CHAIN FV OF C219                                                                                                                           | IMMUNOGLOBULIN                          |
| 1APH | CONFORMATIONAL CHANGES IN CUBIC INSULIN CRYSTALS IN THE PH RANGE 7-11                                                                             | HORMONE                                 |
| 1APM | 2.0 ANGSTROM REFINED CRYSTAL STRUCTURE OF THE CATALYTIC SUBUNIT OF CAMP-DEPENDENT PROTEIN KINASE COMPLEXED WITH A PEPTIDE INHIBITOR AND DETERGENT | TRANSFERASE(PHOSPHOTRANSFERASE)         |
| 1APV | CRYSTALLOGRAPHIC ANALYSIS OF TRANSITION STATE MIMICS BOUND TO PENICILLOPEPSIN: DIFLUOROSTATINE-AND DIFLUOROSTATONE-CONTAINING PEPTIDES            | HYDROLASE(ACID PROTEINASE)              |
| 1APY | HUMAN ASPARTYLGLUCOSAMINIDASE                                                                                                                     | HYDROLASE                               |
| 1APZ | UMAN ASPARTYLGLUCOSAMINIDASE COMPLEX WITH REACTION PRODUCT                                                                                        | COMPLEX (HYDROLASE/PEPTIDE)             |
| 1AQD | HLA-DR1 (DRA, DRB1 0101) HUMAN CLASS II HISTOCOMPATIBILITY PROTEIN (EXTRACELLULAR DOMAIN) COMPLEXED WITH ENDOGENOUS                               | COMPLEX (MHC PROTEIN/ANTIGEN)           |

## PEPTIDE

|      |                                                                                                                                                                                       |                                         |
|------|---------------------------------------------------------------------------------------------------------------------------------------------------------------------------------------|-----------------------------------------|
| 1AQK | THREE-DIMENSIONAL STRUCTURE OF A HUMAN FAB WITH HIGH AFFINITY FOR TETANUS TOXOID                                                                                                      | IMMUNOGLOBULIN                          |
| 1AQV | GLUTATHIONE S-TRANSFERASE IN COMPLEX WITH P-BROMOBENZYLGLUTATHIONE                                                                                                                    | COMPLEX (TRANSFERASE/PEPTIDE)           |
| 1AQW | GLUTATHIONE S-TRANSFERASE IN COMPLEX WITH GLUTATHIONE                                                                                                                                 | TRANSFERASE                             |
| 1AQX | GLUTATHIONE S-TRANSFERASE IN COMPLEX WITH MEISENHEIMER COMPLEX                                                                                                                        | TRANSFERASE                             |
| 1AR1 | STRUCTURE AT 2.7 ANGSTROM RESOLUTION OF THE PARACOCCUS DENITRIFICANS TWO-SUBUNIT CYTOCHROME C OXIDASE COMPLEXED WITH AN ANTIBODY FV FRAGMENT                                          | COMPLEX (OXIDOREDUCTASE/ANTIBODY)       |
| 1ARO | T7 RNA POLYMERASE COMPLEXED WITH T7 LYSOZYME                                                                                                                                          | COMPLEX (POLYMERASE/HYDROLASE)          |
| 1AS4 | CLEAVED ANTICHYMOTRYPSIN A349R                                                                                                                                                        | SERPIN                                  |
| 1AT1 | CRYSTAL STRUCTURES OF PHOSPHONOACETAMIDE LIGATED T AND PHOSPHONOACETAMIDE AND MALONATE LIGATED R STATES OF ASPARTATE CARBAMOYLTRANSFERASE AT 2.8-ANGSTROMS RESOLUTION AND NEUTRAL P*H | TRANSFERASE (CARBAMOYL-P,ASPARTATE)     |
| 1ATI | CRYSTAL STRUCTURE OF GLYCYL-TRNA SYNTHETASE FROM THERMUS THERMOPHILUS                                                                                                                 | PROTEIN BIOSYNTHESIS                    |
| 1AUI | HUMAN CALCINEURIN HETERODIMER                                                                                                                                                         | HYDROLASE                               |
| 1AUS | ACTIVATED UNLIGANDED SPINACH RUBISCO                                                                                                                                                  | LYASE (CARBON-CARBON)                   |
| 1AVA | AMY2/BASI PROTEIN-PROTEIN COMPLEX FROM BARLEY SEED                                                                                                                                    | HYDROLASE INHIBITION                    |
| 1AVF | ACTIVATION INTERMEDIATE 2 OF HUMAN GASTRICSIN FROM HUMAN STOMACH                                                                                                                      | ASPARTYL PROTEASE                       |
| 1AVO | PROTEASOME ACTIVATOR REG(ALPHA)                                                                                                                                                       | PROTEASOME ACTIVATOR                    |
| 1AVP | STRUCTURE OF HUMAN ADENOVIRUS 2 PROTEINASE WITH ITS 11 AMINO ACID COFACTOR                                                                                                            | HYDROLASE                               |
| 1AVZ | V-1 NEF PROTEIN IN COMPLEX WITH WILD TYPE FYN SH3 DOMAIN                                                                                                                              | COMPLEX (MYRISTYLATION/TRANSFERASE)     |
| 1AW8 | PYRUVOYL DEPENDENT ASPARTATE DECARBOXYLASE                                                                                                                                            | DECARBOXYLASE                           |
| 1AWC | MOUSE GABP ALPHA/BETA DOMAIN BOUND TO DNA                                                                                                                                             | TRANSCRIPTION/DNA                       |
| 1AWF | NOVEL COVALENT THROMBIN INHIBITOR FROM PLANT EXTRACT                                                                                                                                  | COMPLEX (PROTEASE/INHIBITOR)            |
| 1AWH | NOVEL COVALENT THROMBIN INHIBITOR FROM PLANT EXTRACT                                                                                                                                  | COMPLEX (PROTEASE/INHIBITOR)            |
| 1AWI | HUMAN PLATELET PROFILIN COMPLEXED WITH THE L-PRO10 PEPTIDE                                                                                                                            | COMPLEX (ACTIN-BINDING PROTEIN/PEPTIDE) |
| 1AXC | HUMAN PCNA                                                                                                                                                                            | COMPLEX (DNA-BINDING PROTEIN/DNA)       |
| 1AXD | STRUCTURE OF GLUTATHIONE S-TRANSFERASE-I BOUND WITH THE LIGAND LACTOYLGLUTATHIONE                                                                                                     | COMPLEX (TRANSFERASE/LIGAND)            |
| 1AXI | STRUCTURAL PLASTICITY AT THE HGH:HGHP INTERFACE                                                                                                                                       | COMPLEX (HORMONE/RECEPTOR)              |
| 1AY1 | ANTI TAQ FAB TP7                                                                                                                                                                      | IMMUNOGLOBULIN                          |
| 1AY6 | THROMBIN INHIBITOR FROM THEONALLA, CYCLOTHEANAMIDE-BASED                                                                                                                              | COMPLEX (SERINE PROTEASE/INHIBITOR)     |



## MACROCYCLIC TRIPEPTIDE MOTIF

|      |                                                                                                                         |                                     |
|------|-------------------------------------------------------------------------------------------------------------------------|-------------------------------------|
| 1AY7 | RIBONUCLEASE SA COMPLEX WITH BARSTAR                                                                                    | COMPLEX (ENZYME/INHIBITOR)          |
| 1AYA | CRYSTAL STRUCTURES OF PEPTIDE COMPLEXES OF THE AMINO-TERMINAL SH2 DOMAIN OF THE SYP TYROSINE PHOSPHATASE                | HYDROLASE(SH2 DOMAIN)               |
| 1AYB | CRYSTAL STRUCTURES OF PEPTIDE COMPLEXES OF THE AMINO-TERMINAL SH2 DOMAIN OF THE SYP TYROSINE PHOSPHATASE                | HYDROLASE(SH2 DOMAIN)               |
| 1AYY | GLYCOSYLASPARAGINASE                                                                                                    | HYDROLASE                           |
| 1AZS | COMPLEX OF GS-ALPHA WITH THE CATALYTIC DOMAINS OF MAMMALIAN ADENYLYL CYCLASE                                            | COMPLEX (LYASE/HYDROLASE)           |
| 1AZZ | FIDDLER CRAB COLLAGENASE COMPLEXED TO ECOTIN                                                                            | COMPLEX (SERINE PROTEASE/INHIBITOR) |
| 1B05 | STRUCTURE OF OLIGO-PEPTIDE BINDING PROTEIN COMPLEXED WITH LYS-CYS-LYS                                                   | PEPTIDE BINDING PROTEIN             |
| 1B0G | CLASS I HISTOCOMPATIBILITY ANTIGEN (HLA-A2.1)/BETA 2-MICROGLOBULIN/PEPTIDE P1049 COMPLEX                                | HISTOCOMPATIBILITY ANTIGEN          |
| 1B0H | OLIGO-PEPTIDE BINDING PROTEIN COMPLEXED WITH LYSYL-NAPHTHYLALANYL-LYSINE                                                | PEPTIDE BINDING PROTEIN             |
| 1B0R | CRYSTAL STRUCTURE OF HLA-A*0201 COMPLEXED WITH A PEPTIDE WITH THE CARBOXYL-TERMINAL GROUP SUBSTITUTED BY A METHYL GROUP | SIGNALING PROTEIN                   |
| 1B17 | PH AFFECTS GLU B13 SWITCHING AND SULFATE BINDING IN CUBIC INSULIN CRYSTALS (PH 5.00 COORDINATES)                        | HORMONE/GROWTH FACTOR               |
| 1B18 | PH AFFECTS GLU B13 SWITCHING AND SULFATE BINDING IN CUBIC INSULIN CRYSTALS (PH 5.53 COORDINATES)                        | HORMONE/GROWTH FACTOR               |
| 1B19 | PH AFFECTS GLU B13 SWITCHING AND SULFATE BINDING IN CUBIC INSULIN CRYSTALS (PH 5.80 COORDINATES)                        | HORMONE/GROWTH FACTOR               |
| 1B1H | OLIGO-PEPTIDE BINDING PROTEIN/TRIPEPTIDE (LYS HPE LYS) COMPLEX                                                          | SIGNALING PROTEIN                   |
| 1B27 | STRUCTURAL RESPONSE TO MUTATION AT A PROTEIN-PROTEIN INTERFACE                                                          | HYDROLASE/HYDROLASE INHIBITOR       |
| 1B2A | PH AFFECTS GLU B13 SWITCHING AND SULFATE BINDING IN CUBIC INSULIN CRYSTALS (PH 6.00 COORDINATES)                        | HORMONE/GROWTH FACTOR               |
| 1B2B | PH AFFECTS GLU B13 SWITCHING AND SULFATE BINDING IN CUBIC INSULIN CRYSTALS (PH 6.16 COORDINATES)                        | HORMONE/GROWTH FACTOR               |
| 1B2C | PH AFFECTS GLU B13 SWITCHING AND SULFATE BINDING IN CUBIC INSULIN CRYSTALS (PH 6.26 COORDINATES)                        | HORMONE/GROWTH FACTOR               |
| 1B2G | PH AFFECTS GLU B13 SWITCHING AND SULFATE BINDING IN CUBIC INSULIN CRYSTALS (PH 9.00 COORDINATES)                        | HORMONE/GROWTH FACTOR               |
| 1B2H | OLIGO-PEPTIDE BINDING PROTEIN COMPLEXED WITH LYSYL-ORNITHYL-LYSINE                                                      | PEPTIDE BINDING PROTEIN             |
| 1B2U | STRUCTURAL RESPONSE TO MUTATION AT A PROTEIN-PROTEIN INTERFACE                                                          | HYDROLASE/HYDROLASE INHIBITOR       |
| 1B2W | COMPARISON OF THE THREE-DIMENSIONAL STRUCTURES OF A HUMANIZED AND A CHIMERIC FAB OF AN ANTI-GAMMA-INTERFERON            | IMMUNE SYSTEM                       |

| ANTIBODY |                                                                                                                       |                                     |
|----------|-----------------------------------------------------------------------------------------------------------------------|-------------------------------------|
| 1B32     | OLIGO-PEPTIDE BINDING PROTEIN (OPPA) COMPLEXED WITH KMK                                                               | PEPTIDE BINDING PROTEIN             |
| 1B33     | STRUCTURE OF LIGHT HARVESTING COMPLEX OF ALLOPHYCOCYANIN ALPHA AND BETA CHAINS/CORE-LINKER COMPLEX AP*LC7.8           | PHOTOSYNTHESIS                      |
| 1B34     | CRYSTAL STRUCTURE OF THE D1D2 SUB-COMPLEX FROM THE HUMAN SNRNP CORE DOMAIN                                            | RNA BINDING PROTEIN                 |
| 1B35     | CRICKET PARALYSIS VIRUS (CRPV)                                                                                        | VIRUS                               |
| 1B3F     | OLIGO-PEPTIDE BINDING PROTEIN (OPPA) COMPLEXED WITH KHK                                                               | PEPTIDE BINDING PROTEIN             |
| 1B3G     | OLIGO-PEPTIDE BINDING PROTEIN (OPPA) COMPLEXED WITH KIK                                                               | PEPTIDE BINDING PROTEIN             |
| 1B3H     | OLIGO-PEPTIDE BINDING PROTEIN COMPLEXED WITH LYSYL-CYCLOHEXYLALANYL-LYSINE                                            | PEPTIDE BINDING PROTEIN             |
| 1B3L     | OLIGO-PEPTIDE BINDING PROTEIN (OPPA) COMPLEXED WITH KGK                                                               | PEPTIDE BINDING PROTEIN             |
| 1B3S     | STRUCTURAL RESPONSE TO MUTATION AT A PROTEIN-PROTEIN INTERFACE                                                        | HYDROLASE/HYDROLASE INHIBITOR       |
| 1B41     | HUMAN ACETYLCHOLINESTERASE COMPLEXED WITH FASCICULIN-II, GLYCOSYLATED PROTEIN                                         | HYDROLASE/TOXIN                     |
| 1B46     | OLIGO-PEPTIDE BINDING PROTEIN (OPPA) COMPLEXED WITH KPK                                                               | PEPTIDE BINDING PROTEIN             |
| 1B4H     | OLIGO-PEPTIDE BINDING PROTEIN COMPLEXED WITH LYSYL-DIAMINOBTYRIC ACID-LYSINE                                          | PEPTIDE BINDING PROTEIN             |
| 1B4J     | COMPARISON OF THE THREE-DIMENSIONAL STRUCTURES OF A HUMANIZED AND A CHIMERIC FAB OF AN ANTI-GAMMA-INTERFERON ANTIBODY | ANTIBODY ENGINEERING                |
| 1B4U     | PROTocatechuate 4,5-dioxygenase (LIGAB) IN COMPLEX WITH PROTocatechuate (PCA)                                         | DIOXYGENASE                         |
| 1B4Z     | OLIGO-PEPTIDE BINDING PROTEIN (OPPA) COMPLEXED WITH KDK                                                               | PEPTIDE BINDING PROTEIN             |
| 1B51     | OLIGO-PEPTIDE BINDING PROTEIN (OPPA) COMPLEXED WITH KSK                                                               | PEPTIDE BINDING PROTEIN             |
| 1B52     | OLIGO-PEPTIDE BINDING PROTEIN (OPPA) COMPLEXED WITH KTK                                                               | PEPTIDE BINDING PROTEIN             |
| 1B5F     | NATIVE CARDOSIN A FROM CYNARA CARDUNCULUS L.                                                                          | HYDROLASE                           |
| 1B5G     | HUMAN THROMBIN COMPLEXED WITH NOVEL SYNTHETIC PEPTIDE MIMETIC INHIBITOR AND HIRUGEN                                   | COMPLEX (SERINE PROTEASE/INHIBITOR) |
| 1B5H     | OLIGO-PEPTIDE BINDING PROTEIN COMPLEXED WITH LYSYL-DIAMINOPROPANOIC ACID-LYSINE                                       | PEPTIDE BINDING PROTEIN             |
| 1B5I     | OLIGO-PEPTIDE BINDING PROTEIN (OPPA) COMPLEXED WITH KNK                                                               | PEPTIDE BINDING PROTEIN             |
| 1B5J     | OLIGO-PEPTIDE BINDING PROTEIN (OPPA) COMPLEXED WITH KQK                                                               | PEPTIDE BINDING PROTEIN             |
| 1B6C     | CRYSTAL STRUCTURE OF THE CYTOPLASMIC DOMAIN OF THE TYPE I TGF-BETA RECEPTOR IN COMPLEX WITH FKBP12                    | COMPLEX (ISOMERASE/PROTEIN KINASE)  |
| 1B6H     | OLIGO-PEPTIDE BINDING PROTEIN COMPLEXED WITH LYSYL-NORVALYL-LYSINE                                                    | PEPTIDE BINDING PROTEIN             |
| 1B70     | PHENYLALANYL TRNA SYNTHETASE COMPLEXED WITH PHENYLALANINE                                                             | LIGASE                              |

|      |                                                                                                                                                                  |                                     |
|------|------------------------------------------------------------------------------------------------------------------------------------------------------------------|-------------------------------------|
| 1B72 | PBX1, HOMEBOX PROTEIN HOX-B1/DNA TERNARY COMPLEX                                                                                                                 | PROTEIN/DNA                         |
| 1B7H | OLIGO-PEPTIDE BINDING PROTEIN COMPLEXED WITH LYSYL-NORLEUCYL-LYSINE                                                                                              | PEPTIDE BINDING PROTEIN             |
| 1B7T | MYOSIN DIGESTED BY PAPAINE                                                                                                                                       | MYOSIN                              |
| 1B7X | STRUCTURE OF HUMAN ALPHA-THROMBIN Y225I MUTANT BOUND TO D-PHE-PRO-ARG-CHLOROMETHYLKETONE                                                                         | HYDROLASE/HYDROLASE INHIBITOR       |
| 1B7Y | HENYLALANYL TRNA SYNTHETASE COMPLEXED WITH PHENYLALANINYL-ADENYLATE                                                                                              | LIGASE                              |
| 1B86 | HUMAN DEOXYHAEMOGLOBIN-2,3-DIPHOSPHOGLYCERATE COMPLEX                                                                                                            | HAEMOGLOBIN                         |
| 1B8D | CRYSTAL STRUCTURE OF A PHYCOUROBILIN-CONTAINING PHYCOERYTHRIN                                                                                                    | PHOTOSYNTHESIS                      |
| 1B8H | SLIDING CLAMP, DNA POLYMERASE                                                                                                                                    | TRANSFERASE                         |
| 1B8I | STRUCTURE OF THE HOMEOTIC UBX/EXD/DNA TERNARY COMPLEX                                                                                                            | TRANSCRIPTION/DNA                   |
| 1B9E | HUMAN INSULIN MUTANT SERB9GLU                                                                                                                                    | HORMONE/GROWTH FACTOR               |
| 1B9X | STRUCTURAL ANALYSIS OF PHOSDUCIN AND ITS PHOSPHORYLATION-REGULATED INTERACTION WITH TRANSDUCIN                                                                   | SIGNALING PROTEIN                   |
| 1B9Y | STRUCTURAL ANALYSIS OF PHOSDUCIN AND ITS PHOSPHORYLATION-REGULATED INTERACTION WITH TRANSDUCIN BETA-GAMMA                                                        | SIGNALING PROTEIN                   |
| 1BA8 | THROMBIN INHIBITOR WITH A RIGID TRIPEPTIDYL ALDEHYDES                                                                                                            | COMPLEX (SERINE PROTEASE/INHIBITOR) |
| 1BAB | HEMOGLOBIN THIONVILLE: AN ALPHA-CHAIN VARIANT WITH A SUBSTITUTION OF A GLUTAMATE FOR VALINE AT NA-1 AND HAVING AN ACETYLATED METHIONINE NH <sub>2</sub> TERMINUS | OXYGEN TRANSPORT                    |
| 1BAF | 2.9 ANGSTROMS RESOLUTION STRUCTURE OF AN ANTI-DINITROPHENYL-SPIN-LABEL MONOCLONAL ANTIBODY FAB FRAGMENT WITH BOUND HAPTEN                                        | IMMUNOGLOBULIN                      |
| 1BAI | STRUCTURAL BASIS FOR SPECIFICITY OF RETROVIRAL PROTEASES                                                                                                         | COMPLEX (PROTEASE/INHIBITOR)        |
| 1BB0 | THROMBIN INHIBITORS WITH RIGID TRIPEPTIDYL ALDEHYDES                                                                                                             | COMPLEX (SERINE PROTEASE/INHIBITOR) |
| 1BB1 | CRYSTAL STRUCTURE OF A DESIGNED, THERMOSTABLE HETEROTRIMERIC COILED COIL                                                                                         | DE NOVO PROTEIN DESIGN              |
| 1BBB | A THIRD QUATERNARY STRUCTURE OF HUMAN HEMOGLOBIN A AT 1.7-ANGSTROMS RESOLUTION                                                                                   | OXYGEN TRANSPORT                    |
| 1BBD | THREE DIMENSIONAL STRUCTURE OF THE FAB FRAGMENT OF A NEUTRALIZING ANTIBODY TO HUMAN RHINOVIRUS SEROTYPE 2                                                        | IMMUNOGLOBULIN                      |
| 1BBJ | CRYSTAL STRUCTURE OF A CHIMERIC FAB' FRAGMENT OF AN ANTIBODY BINDING TUMOUR CELLS                                                                                | IMMUNOGLOBULIN                      |
| 1BBR | THE STRUCTURE OF RESIDUES 7-16 OF THE A ALPHA CHAIN OF HUMAN FIBRINOGEN BOUND TO BOVINE THROMBIN AT 2.3 ANGSTROMS RESOLUTION                                     | SERINE PROTEASE                     |
| 1BC5 | CHEMOTAXIS RECEPTOR RECOGNITION BY PROTEIN METHYLTRANSFERASE CHER                                                                                                | COMPLEX (METHYLTRANSFERASE/PEPTIDE) |
| 1BCC | CYTOCHROME BC1 COMPLEX FROM CHICKEN                                                                                                                              | OXIDOREDUCTASE                      |

|      |                                                                                                                                                       |                                      |
|------|-------------------------------------------------------------------------------------------------------------------------------------------------------|--------------------------------------|
| 1BCP | BINARY COMPLEX OF PERTUSSIS TOXIN AND ATP                                                                                                             | TOXIN                                |
| 1BCS | COMPLEX OF THE WHEAT SERINE CARBOXYPEPTIDASE, CPDW-II, WITH THE MICROBIAL PEPTIDE ALDEHYDE INHIBITOR, CHYMOSTATIN, AND ARGININE AT 100 DEGREES KELVIN | COMPLEX (SERINE PROTEASE/INHIBITOR)  |
| 1BCU | ALPHA-THROMBIN COMPLEXED WITH HIRUGEN AND PROFLAVIN                                                                                                   | COMPLEX (SERINE PROTEASE INHIBITOR)  |
| 1BD2 | COMPLEX BETWEEN HUMAN T-CELL RECEPTOR B7, VIRAL PEPTIDE (TAX) AND MHC CLASS I MOLECULE HLA-A 0201                                                     | COMPLEX (MHC/VIRAL PEPTIDE/RECEPTOR) |
| 1BDJ | COMPLEX STRUCTURE OF HPT DOMAIN AND CHEY                                                                                                              | COMPLEX (CHEMOTAXIS/TRANSFERASE)     |
| 1BE3 | CYTOCHROME BC1 COMPLEX FROM BOVINE                                                                                                                    | ELECTRON TRANSPORT                   |
| 1BE9 | THE THIRD PDZ DOMAIN FROM THE SYNAPTIC PROTEIN PSD-95 IN COMPLEX WITH A C-TERMINAL PEPTIDE DERIVED FROM CRIPT.                                        | PEPTIDE RECOGNITION                  |
| 1BEN | INSULIN COMPLEXED WITH 4-HYDROXYBENZAMIDE                                                                                                             | HORMONE                              |
| 1BEU | TRP SYNTHASE (D60N-IPP-SER) WITH K+                                                                                                                   | CARBON-OXYGEN LYASE                  |
| 1BFO | CAMPATH-1G IGG2B RAT MONOCLONAL FAB                                                                                                                   | ANTIBODY                             |
| 1BGS | RECOGNITION BETWEEN A BACTERIAL RIBONUCLEASE, BARNASE, AND ITS NATURAL INHIBITOR, BARSTAR                                                             | ENDONUCLEASE                         |
| 1BGX | TAQ POLYMERASE IN COMPLEX WITH TP7, AN INHIBITORY FAB                                                                                                 | COMPLEX (POLYMERASE/INHIBITOR)       |
| 1BGY | CYTOCHROME BC1 COMPLEX FROM BOVINE                                                                                                                    | ELECTRON TRANSPORT                   |
| 1BH8 | HTAFII18/HTAFII28 HETERODIMER CRYSTAL STRUCTURE                                                                                                       | TRANSCRIPTION REGULATION COMPLEX     |
| 1BH9 | HTAFII18/HTAFII28 HETERODIMER CRYSTAL STRUCTURE WITH BOUND PCMBS                                                                                      | TRANSCRIPTION REGULATION COMPLEX     |
| 1BHF | P56LCK SH2 DOMAIN INHIBITOR COMPLEX                                                                                                                   | COMPLEX (SH2 DOMAIN/INHIBITOR)       |
| 1BHH | FREE P56LCK SH2 DOMAIN                                                                                                                                | SH2 DOMAIN                           |
| 1BHX | X-RAY STRUCTURE OF THE COMPLEX OF HUMAN ALPHA THROMBIN WITH THE INHIBITOR SDZ 229-357                                                                 | SERINE PROTEASE                      |
| 1BI4 | CATALYTIC DOMAIN OF HIV-1 INTEGRASE                                                                                                                   | DNA INTEGRATION                      |
| 1BI7 | MECHANISM OF G1 CYCLIN DEPENDENT KINASE INHIBITION FROM THE STRUCTURE OF THE CDK6-P16INK4A TUMOR SUPPRESSOR COMPLEX                                   | COMPLEX (KINASE/ANTI-ONCOGENE)       |
| 1BI8 | MECHANISM OF G1 CYCLIN DEPENDENT KINASE INHIBITION FROM THE STRUCTURES CDK6-P19INK4D INHIBITOR COMPLEX                                                | COMPLEX (KINASE/INHIBITOR)           |
| 1BII | THE CRYSTAL STRUCTURE OF H-2DD MHC CLASS I IN COMPLEX WITH THE HIV-1 DERIVED PEPTIDE P18-110                                                          | COMPLEX (MHC I/PEPTIDE)              |
| 1BIQ | RIBONUCLEOSIDE-DIPHOSPHATE REDUCTASE 1 BETA CHAIN MUTANT E238A                                                                                        | OXIDOREDUCTASE                       |
| 1BJ1 | VASCULAR ENDOTHELIAL GROWTH FACTOR IN COMPLEX WITH A NEUTRALIZING ANTIBODY                                                                            | COMPLEX (ANTIBODY/ANTIGEN)           |
| 1BJ3 | CRYSTAL STRUCTURE OF COAGULATION FACTOR IX-BINDING PROTEIN (IX-BP) FROM VENOM OF HABU SNAKE WITH A HETERODIMER OF C-TYPE LECTIN DOMAINS               | COLLAGEN BINDING PROTEIN             |
| 1BJO | THE STRUCTURE OF PHOSPHOSERINE AMINOTRANSFERASE FROM E.                                                                                               | AMINOTRANSFERASE                     |

## COLI IN COMPLEX WITH ALPHA-METHYL-L-GLUTAMATE

|      |                                                                                                                                                                                                      |                                          |
|------|------------------------------------------------------------------------------------------------------------------------------------------------------------------------------------------------------|------------------------------------------|
| 1BJR | COMPLEX FORMED BETWEEN PROTEOLYTICALLY GENERATED LACTOFERRIN FRAGMENT AND PROTEINASE K                                                                                                               | COMPLEX (HYDROLASE/IRON TRANSPORT)       |
| 1BK6 | KARYOPHERIN ALPHA (YEAST) + SV40 T ANTIGEN NLS                                                                                                                                                       | COMPLEX (PROTEIN TRANSPORT/PEPTIDE)      |
| 1BKC | CATALYTIC DOMAIN OF TNF-ALPHA CONVERTING ENZYME (TACE)                                                                                                                                               | ZN-ENDOPEPTIDASE                         |
| 1BKD | COMPLEX OF HUMAN H-RAS WITH HUMAN SOS-1                                                                                                                                                              | COMPLEX(ONCOGENE PROTEIN/EXCHANGE FACTR) |
| 1BKS | TRYPTOPHAN SYNTHASE (E.C.4.2.1.20) FROM SALMONELLA TYPHIMURIUM                                                                                                                                       | LYASE                                    |
| 1BLL | X-RAY CRYSTALLOGRAPHIC DETERMINATION OF THE STRUCTURE OF BOVINE LENS LEUCINE AMINOPEPTIDASE COMPLEXED WITH AMASTATIN: FORMULATION OF A CATALYTIC MECHANISM FEATURING A GEM-DIOLATE TRANSITION STATE  | HYDROLASE(ALPHA-AMINOACYLPEPTIDE)        |
| 1BLX | P19INK4D/CDK6 COMPLEX                                                                                                                                                                                | COMPLEX (INHIBITOR PROTEIN/KINASE)       |
| 1BM3 | IMMUNOGLOBULIN OPG2 FAB-PEPTIDE COMPLEX                                                                                                                                                              | IMMUNE SYSTEM                            |
| 1BMB | GRB2-SH2 DOMAIN IN COMPLEX WITH KPFY*VNVEF (PKF270-974)                                                                                                                                              | HORMONE/GROWTH FACTOR                    |
| 1BMF | BOVINE MITOCHONDRIAL F1-ATPASE                                                                                                                                                                       | ATP PHOSPHORYLASE                        |
| 1BML | COMPLEX OF THE CATALYTIC DOMAIN OF HUMAN PLASMIN AND STREPTOKINASE                                                                                                                                   | BLOOD CLOTTING                           |
| 1BMM | HUMAN ALPHA-THROMBIN COMPLEXED WITH [S-(R*,R*)]-4-[(AMINOIMINOMETHYL)AMINO]-N-[[1-[3-HYDROXY-2-[(2-NAPHTHALENYLSULFONYL)AMINO]-1-OXOPROPYL]-2-PYRROLIDINYL]METHYL]BUTANAMIDE (BMS-186282)            | COMPLEX (SERINE PROTEASE/INHIBITOR)      |
| 1BMN | HUMAN ALPHA-THROMBIN COMPLEXED WITH [S-(R*,R*)]-1-(AMINOIMINOMETHYL)-N-[[1-[N-[(2-NAPHTHALENYLSULFONYL)-L-SERYL]-PYRROLIDINYL]METHYL]-3-PIPERIDENECARBOXAMIDE (BMS-189090)                           | COMPLEX (SERINE PROTEASE/INHIBITOR)      |
| 1BMQ | CRYSTAL STRUCTURE OF THE COMPLEX OF INTERLEUKIN-1BETA CONVERTING ENZYME (ICE) WITH A PEPTIDE BASED INHIBITOR, (3S)-N-METHANESULFONYL-3-({1-[N-(2-NAPHTOYL)-L-VALYL]-L-PROLYL }AMINO)-4-OXOBUTANAMIDE | HYDROLASE                                |
| 1BOG | ANTI-P24 (HIV-1) FAB FRAGMENT CB41 COMPLEXED WITH AN EPIPOE-HOMOLOGOUS PEPTIDE                                                                                                                       | COMPLEX (ANTIBODY/PEPTIDE)               |
| 1BOM | THREE-DIMENSIONAL STRUCTURE OF BOMBYXIN-II, AN INSULIN-RELATED BRAIN-SECRETORY PEPTIDE OF THE SILKMOTH BOMBYX MORI: COMPARISON WITH INSULIN AND RELAXIN                                              | INSULIN-LIKE BRAIN-SECRETORY PEPTIDE     |
| 1BOU | THREE-DIMENSIONAL STRUCTURE OF LIGAB                                                                                                                                                                 | DIOXYGENASE                              |
| 1BP3 | THE XRAY STRUCTURE OF A GROWTH HORMONE-PROLACTIN RECEPTOR COMPLEX                                                                                                                                    | HORMONE/GROWTH FACTOR                    |
| 1BPH | CONFORMATIONAL CHANGES IN CUBIC INSULIN CRYSTALS IN THE PH RANGE 7-11                                                                                                                                | HORMONE                                  |
| 1BPL | GLYCOSYLTRANSFERASE                                                                                                                                                                                  | GLYCOSYLTRANSFERASE                      |
| 1BQH | MURINE CD8AA ECTODOMAIN FRAGMENT IN COMPLEX WITH H-2KB/VSV8                                                                                                                                          | IMMUNE SYSTEM                            |
| 1BQL | STRUCTURE OF AN ANTI-HEL FAB FRAGMENT COMPLEXED WITH                                                                                                                                                 | COMPLEX (ANTIBODY/ANTIGEN)               |

## BOBWHITE QUAIL LYSOZYME

|      |                                                                                                                               |                                        |
|------|-------------------------------------------------------------------------------------------------------------------------------|----------------------------------------|
| 1BQM | HIV-1 RT/HBY 097                                                                                                              | NUCLEOTIDYLTRANSFERASE                 |
| 1BQN | TYR 188 LEU HIV-1 RT/HBY 097                                                                                                  | NUCLEOTIDYLTRANSFERASE                 |
| 1BQP | THE STRUCTURE OF THE PEA LECTIN-D-MANNOPYRANOSE COMPLEX                                                                       | PLANT PROTEIN                          |
| 1BQQ | CRYSTAL STRUCTURE OF THE MT1-MMP--TIMP-2 COMPLEX                                                                              | HYDROLASE/HYDROLASE INHIBITOR          |
| 1BR1 | SMOOTH MUSCLE MYOSIN MOTOR DOMAIN-ESSENTIAL LIGHT CHAIN COMPLEX WITH MGADP.ALF4 BOUND AT THE ACTIVE SITE                      | MUSCLE PROTEIN                         |
| 1BR4 | SMOOTH MUSCLE MYOSIN MOTOR DOMAIN-ESSENTIAL LIGHT CHAIN COMPLEX WITH MGADP.BEF3 BOUND AT THE ACTIVE SITE                      | MUSCLE PROTEIN                         |
| 1BR8 | IMPLICATIONS FOR FUNCTION AND THERAPY OF A 2.9A STRUCTURE OF BINARY-COMPLEXED ANTITHROMBIN                                    | BLOOD CLOTTING                         |
| 1BRC | RELOCATING A NEGATIVE CHARGE IN THE BINDING POCKET OF TRYPSIN                                                                 | COMPLEX(PROTEINASE/INHIBITOR)          |
| 1BRL | THREE-DIMENSIONAL STRUCTURE OF BACTERIAL LUCIFERASE FROM VIBRIO HARVEYI AT 2.4 ANGSTROMS RESOLUTION                           | LUMINESCENCE                           |
| 1BRS | PROTEIN-PROTEIN RECOGNITION: CRYSTAL STRUCTURAL ANALYSIS OF A BARNASE-BARSTAR COMPLEX AT 2.0-A RESOLUTION                     | ENDONUCLEASE                           |
| 1BS6 | PEPTIDE DEFORMYLASE AS NI2+ CONTAINING FORM IN COMPLEX WITH TRIPEPTIDE MET-ALA-SER                                            | HYDROLASE                              |
| 1BS8 | PEPTIDE DEFORMYLASE AS ZN2+ CONTAINING FORM IN COMPLEX WITH TRIPEPTIDE MET-ALA-SER                                            | HYDROLASE                              |
| 1BSX | STRUCTURE AND SPECIFICITY OF NUCLEAR RECEPTOR-COACTIVATOR INTERACTIONS                                                        | HORMONE/GROWTH FACTOR                  |
| 1BT6 | P11 (S100A10), LIGAND OF ANNEXIN II IN COMPLEX WITH ANNEXIN II N-TERMINUS                                                     | COMPLEX (LIGAND/ANNEXIN)               |
| 1BTH | STRUCTURE OF THROMBIN COMPLEXED WITH BOVINE PANCREATIC TRYPSIN INHIBITOR                                                      | COMPLEX (SERINE PROTEASE/INHIBITOR)    |
| 1BUH | CRYSTAL STRUCTURE OF THE HUMAN CDK2 KINASE COMPLEX WITH CELL CYCLE-REGULATORY PROTEIN CKSHS1                                  | TRANSFERASE                            |
| 1BUI | STRUCTURE OF THE TERNARY MICROPLASMIN-STAPHYLOKINASE-MICROPLASMIN COMPLEX: A PROTEINASE-COFACTOR-SUBSTRATE COMPLEX IN ACTION. | HYDROLASE                              |
| 1BUN | STRUCTURE OF BETA2-BUNGAROTOXIN: POTASSIUM CHANNEL BINDING BY KUNITZ MODULES AND TARGETED PHOSPHOLIPASE ACTION                | TOXIN                                  |
| 1BUV | CRYSTAL STRUCTURE OF THE MT1-MMP-TIMP-2 COMPLEX                                                                               | HYDROLASE/HYDROLASE INHIBITOR          |
| 1BUW | CRYSTAL STRUCTURE OF S-NITROSO-NITROSYL HUMAN HEMOGLOBIN A                                                                    | OXYGEN STORAGE/TRANSPORT               |
| 1BVK | HUMANIZED ANTI-LYSOZYME FV COMPLEXED WITH LYSOZYME                                                                            | COMPLEX (HUMANIZED ANTIBODY/HYDROLASE) |
| 1BVN | PIG PANCREATIC ALPHA-AMYLASE IN COMPLEX WITH THE PROTEINACEOUS INHIBITOR TENDAMISTAT                                          | HYDROLASE/HYDROLASE INHIBITOR          |
| 1BVY | COMPLEX OF THE HEME AND FMN-BINDING DOMAINS OF THE CYTOCHROME P450(BM-3)                                                      | OXIDOREDUCTASE                         |

|      |                                                                                                                                                            |                                    |
|------|------------------------------------------------------------------------------------------------------------------------------------------------------------|------------------------------------|
| 1BWV | ACTIVATED RIBULOSE 1,5-BISPHOSPHATE CARBOXYLASE/OXYGENASE (RUBISCO) COMPLEXED WITH THE REACTION INTERMEDIATE ANALOGUE 2-CARBOXYARABINITOL 1,5-BISPHOSPHATE | LYASE                              |
| 1BX2 | CRYSTAL STRUCTURE OF HLA-DR2 (DRA*0101,DRB1*1501) COMPLEXED WITH A PEPTIDE FROM HUMAN MYELIN BASIC PROTEIN                                                 | IMMUNE SYSTEM                      |
| 1BXG | PHENYLALANINE DEHYDROGENASE STRUCTURE IN TERNARY COMPLEX WITH NAD+ AND BETA-PHENYLPROPIONATE                                                               | AMINO ACID DEHYDROGENASE           |
| 1BXI | CRYSTAL STRUCTURE OF THE ESCHERICHIA COLI COLICIN E9 DNASE DOMAIN WITH ITS COGNATE IMMUNITY PROTEIN IM9                                                    | IMMUNE SYSTEM                      |
| 1BXL | STRUCTURE OF BCL-XL/BAK PEPTIDE COMPLEX, NMR, MINIMIZED AVERAGE STRUCTURE                                                                                  | COMPLEX (APOPTOSIS/PEPTIDE)        |
| 1BXN | THE CRYSTAL STRUCTURE OF RUBISCO FROM ALCALIGENES EUTROPHUS TO 2.7 ANGSTROMS.                                                                              | LYASE                              |
| 1BXR | STRUCTURE OF CARBAMOYL PHOSPHATE SYNTHETASE COMPLEXED WITH THE ATP ANALOG AMPPNP                                                                           | AMIDOTRANSFERASE                   |
| 1BZ0 | HEMOGLOBIN A (HUMAN, DEOXY, HIGH SALT)                                                                                                                     | OXYGEN STORAGE/TRANSPORT           |
| 1BZ1 | HEMOGLOBIN (ALPHA + MET) VARIANT                                                                                                                           | OXYGEN STORAGE/TRANSPORT           |
| 1BZ7 | FAB FRAGMENT FROM MURINE ASCITES                                                                                                                           | IMMUNE SYSTEM                      |
| 1BZ9 | CRYSTAL STRUCTURE OF MURINE CLASS I MHC H2-DB COMPLEXED WITH A SYNTHETIC PEPTIDE P1027                                                                     | MURINE CLASS I MHC/PEPTIDE COMPLEX |
| 1BZH | CYCLIC PEPTIDE INHIBITOR OF HUMAN PTP1B                                                                                                                    | HYDROLASE                          |
| 1BZQ | COMPLEX OF A DROMEDARY SINGLE-DOMAIN VHH ANTIBODY FRAGMENT WITH RNASE A                                                                                    | HYDROLASE/IMMUNE SYSTEM            |
| 1BZZ | HEMOGLOBIN (ALPHA V1M) MUTANT                                                                                                                              | OXYGEN STORAGE/TRANSPORT           |
| 1C08 | CRYSTAL STRUCTURE OF HYHEL-10 FV-HEN LYSOZYME COMPLEX                                                                                                      | IMMUNE SYSTEM/HYDROLASE            |
| 1C0F | CRYSTAL STRUCTURE OF DICTYOSTELIUM CAATP-ACTIN IN COMPLEX WITH GELSOLIN SEGMENT 1                                                                          | CONTRACTILE PROTEIN                |
| 1C0G | CRYSTAL STRUCTURE OF 1:1 COMPLEX BETWEEN GELSOLIN SEGMENT 1 AND A DICTYOSTELIUM/TETRAHYMENA CHIMERA ACTIN (MUTANT 228: Q228K/T229A/A230Y/E360H)            | CONTRACTILE PROTEIN                |
| 1C0T | CRYSTAL STRUCTURE OF HIV-1 REVERSE TRANSCRIPTASE IN COMPLEX WITH BM+21.1326                                                                                | TRANSFERASE                        |
| 1C0U | CRYSTAL STRUCTURE OF HIV-1 REVERSE TRANSCRIPTASE IN COMPLEX WITH BM+50.0934                                                                                | TRANSFERASE                        |
| 1C12 | INSIGHT IN ODORANT PERCEPTION: THE CRYSTAL STRUCTURE AND BINDING CHARACTERISTICS OF ANTIBODY FRAGMENTS DIRECTED AGAINST THE MUSK ODORANT TRASEOLIDE        | IMMUNE SYSTEM                      |
| 1C17 | A1C12 SUBCOMPLEX OF F1FO ATP SYNTHASE                                                                                                                      | MEMBRANE PROTEIN                   |
| 1C1B | CRYSTAL STRUCTURE OF HIV-1 REVERSE TRANSCRIPTASE IN COMPLEX WITH GCA-186                                                                                   | TRANSFERASE                        |
| 1C1C | CRYSTAL STRUCTURE OF HIV-1 REVERSE TRANSCRIPTASE IN COMPLEX WITH TNK-6123                                                                                  | TRANSFERASE                        |

|      |                                                                                                                                                                 |                          |
|------|-----------------------------------------------------------------------------------------------------------------------------------------------------------------|--------------------------|
| 1C1E | CRYSTAL STRUCTURE OF A DIELS-ALDERASE CATALYTIC ANTIBODY 1E9 IN COMPLEX WITH ITS HAPTEN                                                                         | IMMUNE SYSTEM            |
| 1C1U | RECRUITING ZINC TO MEDIATE POTENT, SPECIFIC INHIBITION OF SERINE PROTEASES                                                                                      | BLOOD CLOTING            |
| 1C1V | RECRUITING ZINC TO MEDIATE POTENT, SPECIFIC INHIBITION OF SERINE PROTEASES                                                                                      | BLOOD CLOTING            |
| 1C1W | RECRUITING ZINC TO MEDIATE POTENT, SPECIFIC INHIBITION OF SERINE PROTEASES                                                                                      | BLOOD CLOTING            |
| 1C1Y | CRYSTAL STRUCTURE OF RAP.GMPPNP IN COMPLEX WITH THE RAS-BINDING-DOMAIN OF C-RAF1 KINASE (RAFRBD).                                                               | SIGNALING PROTEIN        |
| 1C29 | CRYSTAL STRUCTURE OF THE COMPLEX OF BACTERIAL TRYPTOPHAN SYNTHASE WITH THE TRANSITION STATE ANALOGUE INHIBITOR 4-(2-HYDROXYPHENYLTHIO)-1-BUTENYLPHOSPHONIC ACID | LYASE/LYASE INHIBITOR    |
| 1C30 | CRYSTAL STRUCTURE OF CARBAMOYL PHOSPHATE SYNTHETASE: SMALL SUBUNIT MUTATION C269S                                                                               | LIGASE                   |
| 1C3A | CRYSTAL STRUCTURE OF FLAVOCETIN-A FROM THE HABU SNAKE VENOM, A NOVEL CYCLIC TETRAMER OF C-TYPE LECTIN-LIKE HETERODIMERS                                         | MEMBRANE PROTEIN         |
| 1C3O | CRYSTAL STRUCTURE OF THE CARBAMOYL PHOSPHATE SYNTHETASE: SMALL SUBUNIT MUTANT C269S WITH BOUND GLUTAMINE                                                        | LIGASE                   |
| 1C40 | BAR-HEADED GOOSE HEMOGLOBIN (AQUOMET FORM)                                                                                                                      | OXYGEN STORAGE/TRANSPORT |
| 1C4Z | STRUCTURE OF E6AP: INSIGHTS INTO UBIQUITINATION PATHWAY                                                                                                         | LIGASE                   |
| 1C5B | DECARBOXYLASE CATALYTIC ANTIBODY 21D8 UNLIGANDED FORM                                                                                                           | IMMUNE SYSTEM            |
| 1C5C | DECARBOXYLASE CATALYTIC ANTIBODY 21D8-HAPTEN COMPLEX                                                                                                            | IMMUNE SYSTEM            |
| 1C5D | THE CRYSTAL STRUCTURE OF THE FAB FRAGMENT OF A RAT MONOCLONAL ANTIBODY AGAINST THE MAIN IMMUNOGENIC REGION OF THE HUMAN MUSCLE ACETYLCHOLINE RECEPTOR           | IMMUNE SYSTEM            |
| 1C5F | CRYSTAL STRUCTURE OF THE CYCLOPHILIN-LIKE DOMAIN FROM BRUGIA MALAYI COMPLEXED WITH CYCLOSPORIN A                                                                | ISOMERASE/IMMUNE SYSTEM  |
| 1C5L | STRUCTURAL BASIS FOR SELECTIVITY OF A SMALL MOLECULE, S1-BINDING, SUB-MICROMOLAR INHIBITOR OF UROKINASE TYPE PLASMINOGEN ACTIVATOR                              | BLOOD CLOTING            |
| 1C5M | STRUCTURAL BASIS FOR SELECTIVITY OF A SMALL MOLECULE, S1-BINDING, SUB-MICROMOLAR INHIBITOR OF UROKINASE TYPE PLASMINOGEN ACTIVATOR                              | BLOOD CLOTING            |
| 1C5N | STRUCTURAL BASIS FOR SELECTIVITY OF A SMALL MOLECULE, S1-BINDING, SUB-MICROMOLAR INHIBITOR OF UROKINASE TYPE PLASMINOGEN ACTIVATOR                              | BLOOD CLOTING            |
| 1C5O | STRUCTURAL BASIS FOR SELECTIVITY OF A SMALL MOLECULE, S1-BINDING, SUB-MICROMOLAR INHIBITOR OF UROKINASE TYPE PLASMINOGEN ACTIVATOR                              | BLOOD CLOTING            |
| 1C6V | SIV INTEGRASE (CATALYTIC DOMAIN + DNA BIDDING DOMAIN COMPRISING RESIDUES 50-293) MUTANT WITH PHE 185 REPLACED BY HIS (F185H)                                    | DNA BINDING PROTEIN      |
| 1C7B | DEOXY RHB1.0 (RECOMBINANT HEMOGLOBIN)                                                                                                                           | OXYGEN STORAGE/TRANSPORT |



|      |                                                                                                                                                                      |                                     |
|------|----------------------------------------------------------------------------------------------------------------------------------------------------------------------|-------------------------------------|
| 1C7C | DEOXY RHB1.1 (RECOMBINANT HEMOGLOBIN)                                                                                                                                | OXYGEN STORAGE/TRANSPORT            |
| 1C7D | DEOXY RHB1.2 (RECOMBINANT HEMOGLOBIN)                                                                                                                                | OXYGEN STORAGE/TRANSPORT            |
| 1C8O | 2.9 A STRUCTURE OF CLEAVED VIRAL SERPIN CRMA                                                                                                                         | VIRAL PROTEIN                       |
| 1C8V | CRYSTAL STRUCTURE OF THE COMPLEX OF BACTERIAL TRYPTOPHAN SYNTHASE WITH THE TRANSITION STATE ANALOGUE INHIBITOR 4-(2-HYDROXYPHENYLTHIO)-BUTYLPHOSPHONIC ACID          | LYASE                               |
| 1C9B | CRYSTAL STRUCTURE OF A HUMAN TBP CORE DOMAIN-HUMAN TFIIB CORE DOMAIN COMPLEX BOUND TO AN EXTENDED, MODIFIED ADENOVIRAL MAJOR LATE PROMOTER (ADMLP)                   | TRANSCRIPTION/DNA                   |
| 1C9D | CRYSTAL STRUCTURE OF THE COMPLEX OF BACTERIAL TRYPTOPHAN SYNTHASE WITH THE TRANSITION STATE ANALOGUE INHIBITOR 4-(2-HYDROXY-4-FLUOROPHENYLTHIO)-BUTYLPHOSPHONIC ACID | LYASE                               |
| 1C9I | PEPTIDE-IN-GROOVE INTERACTIONS LINK TARGET PROTEINS TO THE B-PROPELLER OF CLATHRIN                                                                                   | ENDOCYTOSIS/EXOCYTOSIS              |
| 1C9L | PEPTIDE-IN-GROOVE INTERACTIONS LINK TARGET PROTEINS TO THE B-PROPELLER OF CLATHRIN                                                                                   | ENDOCYTOSIS/EXOCYTOSIS              |
| 1C9T | COMPLEX OF BDELLASTASIN WITH BOVINE TRYPSIN                                                                                                                          | HYDROLASE/HYDROLASE INHIBITOR       |
| 1CA0 | BOVINE CHYMOTRYPSIN COMPLEXED TO APPI                                                                                                                                | COMPLEX (SERINE PROTEASE/INHIBITOR) |
| 1CA8 | THROMBIN INHIBITORS WITH RIGID TRIPEPTIDYL ALDEHYDES                                                                                                                 | COMPLEX (SERINE PROTEASE/INHIBITOR) |
| 1CA9 | STRUCTURE OF TNF RECEPTOR ASSOCIATED FACTOR 2 IN COMPLEX WITH A PEPTIDE FROM TNF-R2                                                                                  | TNF SIGNALING                       |
| 1CAU | DETERMINATION OF THREE CRYSTAL STRUCTURES OF CANAVALIN BY MOLECULAR REPLACEMENT                                                                                      | SEED STORAGE PROTEIN                |
| 1CAW | DETERMINATION OF THREE CRYSTAL STRUCTURES OF CANAVALIN BY MOLECULAR REPLACEMENT                                                                                      | SEED STORAGE PROTEIN                |
| 1CAX | DETERMINATION OF THREE CRYSTAL STRUCTURES OF CANAVALIN BY MOLECULAR REPLACEMENT                                                                                      | SEED STORAGE PROTEIN                |
| 1CB7 | LUTAMATE MUTASE FROM CLOSTRIDIUM COCHLEARIUM RECONSTITUTED WITH METHYL-COBALAMIN                                                                                     | ISOMERASE                           |
| 1CBV | AN AUTOANTIBODY TO SINGLE-STRANDED DNA: COMPARISON OF THE THREE-DIMENSIONAL STRUCTURES OF THE UNLIGANDED FAB AND A DEOXYNUCLEOTIDE-FAB COMPLEX                       | IMMUNE SYSTEM/DNA                   |
| 1CBW | BOVINE CHYMOTRYPSIN COMPLEXED TO BPTI                                                                                                                                | COMPLEX (SERINE PROTEASE/INHIBITOR) |
| 1CC0 | CRYSTAL STRUCTURE OF THE RHOA.GDP-RHO GDI COMPLEX                                                                                                                    | SIGNALING PROTEIN                   |
| 1CC1 | CRYSTAL STRUCTURE OF A REDUCED, ACTIVE FORM OF THE NI-FE-SE HYDROGENASE FROM DESULFOMICROBIUM BACULATUM                                                              | OXIDOREDUCTASE                      |
| 1CCW | STRUCTURE OF THE COENZYME B12 DEPENDENT ENZYME GLUTAMATE MUTASE FROM CLOSTRIDIUM COCHLEARIUM                                                                         | ISOMERASE                           |
| 1CD1 | CD1(MOUSE) ANTIGEN PRESENTING MOLECULE                                                                                                                               | CD1                                 |
| 1CD3 | PROCAPSID OF BACTERIOPHAGE PHIX174                                                                                                                                   | VIRUS                               |
| 1CD9 | 2:2 COMPLEX OF G-CSF WITH ITS RECEPTOR                                                                                                                               | CYTOKINE                            |

|      |                                                                                                                                                                                                                                                                       |                                         |
|------|-----------------------------------------------------------------------------------------------------------------------------------------------------------------------------------------------------------------------------------------------------------------------|-----------------------------------------|
| 1CDK | CAMP-DEPENDENT PROTEIN KINASE CATALYTIC SUBUNIT (E.C.2.7.1.37) (PROTEIN KINASE A) COMPLEXED WITH PROTEIN KINASE INHIBITOR PEPTIDE FRAGMENT 5-24 (PKI(5-24) ISOELECTRIC VARIANT CA) AND MN <sup>2+</sup> ADENYLYL IMIDODIPHOSPHATE (MNAMP-PNP) AT PH 5.6 AND 7C AND 4C | COMPLEX (TRANSFERASE/INHIBITOR)         |
| 1CDL | TARGET ENZYME RECOGNITION BY CALMODULIN: 2.4 ANGSTROMS STRUCTURE OF A CALMODULIN-PEPTIDE COMPLEX                                                                                                                                                                      | CALCIUM-BINDING PROTEIN                 |
| 1CDM | MODULATION OF CALMODULIN PLASTICITY IN MOLECULAR RECOGNITION ON THE BASIS OF X-RAY STRUCTURES                                                                                                                                                                         | CALCIUM-BINDING PROTEIN                 |
| 1CE1 | 1.9A STRUCTURE OF THE THERAPEUTIC ANTIBODY CAMPATH-1H FAB IN COMPLEX WITH A SYNTHETIC PEPTIDE ANTIGEN                                                                                                                                                                 | ANTIBODY                                |
| 1CE6 | MHC CLASS I H-2DB COMPLEXED WITH A SENDAI VIRUS NUCLEOPROTEIN PEPTIDE                                                                                                                                                                                                 | MHC CLASS I                             |
| 1CE7 | MISTLETOE LECTIN I FROM VISCUM ALBUM                                                                                                                                                                                                                                  | RIBOSOME                                |
| 1CE8 | CARBAMOYL PHOSPHATE SYNTHETASE FROM ESCHERICHIS COLI WITH COMPLEXED WITH THE ALLOSTERIC LIGAND IMP                                                                                                                                                                    | LIGASE IMP                              |
| 1CF0 | HUMAN PLATELET PROFILIN COMPLEXED WITH AN L-PRO10- IODOTYROSINE PEPTIDE                                                                                                                                                                                               | COMPLEX (ACTIN-BINDING PROTEIN/PEPTIDE) |
| 1CF7 | STRUCTURAL BASIS OF DNA RECOGNITION BY THE HETERODIMERIC CELL CYCLE TRANSCRIPTION FACTOR E2F-DP                                                                                                                                                                       | TRANSCRIPTION/DNA                       |
| 1CF8 | CONVERGENCE OF CATALYTIC ANTIBODY AND TERPENE CYCLASE MECHANISMS: POLYENE CYCLIZATION DIRECTED BY CARBOCATION-PI INTERACTIONS                                                                                                                                         | CATALYTIC ANTIBODY                      |
| 1CFN | ANTI-P24 (HIV-1) FAB FRAGMENT CB41 COMPLEXED WITH AN EPITOPE-RELATED PEPTIDE                                                                                                                                                                                          | POLYSPECIFICITY                         |
| 1CFQ | ANTI-P24 (HIV-1) FAB FRAGMENT CB41                                                                                                                                                                                                                                    | POLYSPECIFICITY                         |
| 1CFS | ANTI-P24 (HIV-1) FAB FRAGMENT CB41 COMPLEXED WITH AN EPITOPE-UNRELATED PEPTIDE                                                                                                                                                                                        | POLYSPECIFICITY                         |
| 1CFT | ANTI-P24 (HIV-1) FAB FRAGMENT CB41 COMPLEXED WITH AN EPITOPE-UNRELATED D-PEPTIDE                                                                                                                                                                                      | POLYSPECIFICITY                         |
| 1CG5 | DEOXY FORM HEMOGLOBIN FROM DASYATIS AKAJEI                                                                                                                                                                                                                            | OXYGEN TRANSPORT                        |
| 1CG8 | CO FORM HEMOGLOBIN FROM DASYATIS AKAJEI                                                                                                                                                                                                                               | OXYGEN TRANSPORT                        |
| 1CG9 | COMPLEX RECOGNITION OF THE SUPERTYPIC BW6-DETERMINANT ON HLA-B AND-C MOLECULES BY THE MONOCLONAL ANTIBODY SFR8-B6                                                                                                                                                     | MHC CLASS I                             |
| 1CGI | THREE-DIMENSIONAL STRUCTURE OF THE COMPLEXES BETWEEN BOVINE CHYMOTRYPSINOGEN*A AND TWO RECOMBINANT VARIANTS OF HUMAN PANCREATIC SECRETORY TRYPSIN INHIBITOR (KAZAL-TYPE)                                                                                              | SERINE PROTEASE/INHIBITOR COMPLEX       |
| 1CGJ | THREE-DIMENSIONAL STRUCTURE OF THE COMPLEXES BETWEEN BOVINE CHYMOTRYPSINOGEN*A AND TWO RECOMBINANT VARIANTS OF HUMAN PANCREATIC SECRETORY TRYPSIN INHIBITOR (KAZAL-TYPE)                                                                                              | SERINE PROTEASE/INHIBITOR COMPLEX       |
| 1CGL | STRUCTURE OF THE CATALYTIC DOMAIN OF FIBROBLAST COLLAGENASE COMPLEXED WITH AN INHIBITOR                                                                                                                                                                               | METALLOPROTEASE                         |
| 1CGS | LOCAL AND TRANSMITTED CONFORMATIONAL CHANGES ON COMPLEXATION OF AN ANTI-SWEETENER FAB                                                                                                                                                                                 | IMMUNOGLOBULIN                          |

|      |                                                                                                                                                            |                                         |
|------|------------------------------------------------------------------------------------------------------------------------------------------------------------|-----------------------------------------|
| 1CHO | CRYSTAL AND MOLECULAR STRUCTURES OF THE COMPLEX OF ALPHA-<br>*CHYMOTRYPSIN WITH ITS INHIBITOR TURKEY OVOMUCOID THIRD<br>DOMAIN AT 1.8 ANGSTROMS RESOLUTION | COMPLEX(SERINE PROTEINASE-INHIBITOR)    |
| 1CI6 | TRANSCRIPTION FACTOR ATF4-C/EBP BETA BZIP HETERODIMER                                                                                                      | TRANSCRIPTION                           |
| 1CIC | IDIOCOPE-ANTI-IDIOCOPE FAB-FAB COMPLEX; D1.3-E225                                                                                                          | IMMUNOGLOBULIN                          |
| 1CIQ | COMPLEX OF TWO FRAGMENTS OF CI2, RESIDUES 1-40 AND 41-64                                                                                                   | SERINE PROTEASE INHIBITOR               |
| 1CJF | PROFILIN BINDS PROLINE-RICH LIGANDS IN TWO DISTINCT AMIDE<br>BACKBONE ORIENTATIONS                                                                         | STRUCTURAL REGULATION PROTEIN           |
| 1CJK | COMPLEX OF GS-ALPHA WITH THE CATALYTIC DOMAINS OF MAMMALIAN<br>ADENYLYL CYCLASE: COMPLEX WITH ADENOSINE 5'-(ALPHA THIO)-<br>TRIPHOSPHATE (RP), MG, AND MN  | LYASE/LYASE/SIGNALING PROTEIN           |
| 1CJR | X-RAY CRYSTALLOGRAPHIC STUDIES OF DENATURATION IN<br>RIBONUCLEASE S                                                                                        | HYDROLASE                               |
| 1CJT | COMPLEX OF GS-ALPHA WITH THE CATALYTIC DOMAINS OF MAMMALIAN<br>ADENYLYL CYCLASE: COMPLEX WITH BETA-L-2',3'-DIDEOXYATP, MN,<br>AND MG                       | LYASE/LYASE/SIGNALING PROTEIN           |
| 1CJU | COMPLEX OF GS-ALPHA WITH THE CATALYTIC DOMAINS OF MAMMALIAN<br>ADENYLYL CYCLASE: COMPLEX WITH BETA-L-2',3'-DIDEOXYATP AND<br>MG                            | LYASE/LYASE/SIGNALING PROTEIN           |
| 1CJV | COMPLEX OF GS-ALPHA WITH THE CATALYTIC DOMAINS OF MAMMALIAN<br>ADENYLYL CYCLASE: COMPLEX WITH BETA-L-2',3'-DIDEOXYATP, MG,<br>AND ZN                       | LYASE/LYASE/SIGNALING PROTEIN           |
| 1CK0 | ANTI-ANTI-IDIOTYPIC ANTIBODY AGAINST HUMAN ANGIOTENSIN II,<br>UNLIGANDED FORM                                                                              | IMMUNOGLOBULIN                          |
| 1CKN | STRUCTURE OF GUANYLYLATED MRNA CAPPING ENZYME COMPLEXED<br>WITH GTP                                                                                        | CAPPING ENZYME                          |
| 1CL7 | ANTI HIV1 PROTEASE FAB                                                                                                                                     | IMMUNE SYSTEM                           |
| 1CLO | ANTI-CARCINOEMBRYONIC ANTIGEN MONOCLONAL ANTIBODY A5B7                                                                                                     | IMMUNOGLOBULIN                          |
| 1CLS | CROSS-LINKED HUMAN HEMOGLOBIN DEOXY                                                                                                                        | OXYGEN TRANSPORT                        |
| 1CLV | ELLOW MEAL WORM ALPHA-AMYLASE IN COMPLEX WITH THE AMARANTH<br>ALPHA-AMYLASE INHIBITOR                                                                      | HYDROLASE                               |
| 1CLY | IGG FAB (HUMAN IGG1, KAPPA) CHIMERIC FRAGMENT (CBR96)<br>COMPLEXED WITH LEWIS Y NONOATE METHYL ESTER                                                       | IMMUNOGLOBULIN                          |
| 1CLZ | IGG FAB (IGG3, KAPPA) FRAGMENT (MBR96) COMPLEXED WITH LEWIS<br>Y NONOATE METHYL ESTER                                                                      | IMMUNOGLOBULIN                          |
| 1CM1 | MOTIONS OF CALMODULIN-SINGLE-CONFORMER REFINEMENT                                                                                                          | COMPLEX (CALCIUM-BINDING/TRANSFERASE)   |
| 1CMI | STRUCTURE OF THE HUMAN PIN/LC8 DIMER WITH A BOUND PEPTIDE                                                                                                  | OXIDOREDUCTASE/OXIDOREDUCTASE INHIBITOR |
| 1CMK | CRYSTAL STRUCTURES OF THE MYRISTYLATED CATALYTIC SUBUNIT OF<br>CAMP-DEPENDENT PROTEIN KINASE REVEAL OPEN AND CLOSED<br>CONFORMATIONS                       | PHOSPHOTRANSFERASE                      |
| 1CMX | STRUCTURAL BASIS FOR THE SPECIFICITY OF UBIQUITIN C-<br>TERMINAL HYDROLASES                                                                                | HYDROLASE                               |
| 1CMY | THE MUTATION BETA99 ASP-TYR STABILIZES Y-A NEW, COMPOSITE                                                                                                  | OXYGEN TRANSPORT                        |

## QUATERNARY STATE OF HUMAN HEMOGLOBIN

|      |                                                                                                                                                                                                                                                                                   |                                      |
|------|-----------------------------------------------------------------------------------------------------------------------------------------------------------------------------------------------------------------------------------------------------------------------------------|--------------------------------------|
| 1CN3 | INTERACTION OF POLYOMAVIRUS INTERNAL PROTEIN VP2 WITH MAJOR CAPSID PROTEIN VP1 AND IMPLICATIONS FOR PARTICIPATION OF VP2 IN VIRAL ENTRY                                                                                                                                           | VIRAL PROTEIN                        |
| 1CN4 | ERYTHROPOIETIN COMPLEXED WITH EXTRACELLULAR DOMAINS OF ERYTHROPOIETIN RECEPTOR                                                                                                                                                                                                    | HAEMATOPOIETIC CYTOKINE              |
| 1COH | STRUCTURE OF HAEMOGLOBIN IN THE DEOXY QUATERNARY STATE WITH LIGAND BOUND AT THE ALPHA HAEMS                                                                                                                                                                                       | OXYGEN TRANSPORT                     |
| 1COW | BOVINE MITOCHONDRIAL F1-ATPASE COMPLEXED WITH AUROVERTIN B                                                                                                                                                                                                                        | HYDROGEN ION TRANSPORT               |
| 1CP3 | CRYSTAL STRUCTURE OF THE COMPLEX OF APOPAIN WITH THE TETRAPEPTIDE INHIBITOR ACE-DVAD-FMC                                                                                                                                                                                          | COMPLEX (PROTEASE/INHIBITOR)         |
| 1CP9 | CRYSTAL STRUCTURE OF PENICILLIN G ACYLASE FROM THE BRO1 MUTANT STRAIN OF PROVIDENCIA RETTGERI                                                                                                                                                                                     | HYDROLASE                            |
| 1CPC | ISOLATION, CRYSTALLIZATION, CRYSTAL STRUCTURE ANALYSIS AND REFINEMENT OF CONSTITUTIVE C-PHYCOCYANIN FROM THE CHROMATICALLY ADAPTING CYANOBACTERIUM FREMYELLA DIPLOSIPHON AT 1.66 ANGSTROMS RESOLUTION                                                                             | LIGHT HARVESTING PROTEIN             |
| 1CPH | CONFORMATIONAL CHANGES IN CUBIC INSULIN CRYSTALS IN THE PH RANGE 7-11                                                                                                                                                                                                             | HORMONE                              |
| 1CPI | REGIOSELECTIVE STRUCTURAL AND FUNCTIONAL MIMICRY OF PEPTIDES. DESIGN OF HYDROLYTICALLY STABLE CYCLIC PEPTIDOMIMETIC INHIBITORS OF HIV-1 PROTEASE                                                                                                                                  | COMPLEX (ACID PROTEINASE/PEPTIDE)    |
| 1CQ4 | C12 MUTANT WITH TETRAGLUTAMINE (MGQQQGM) REPLACING MET59                                                                                                                                                                                                                          | HYDROLASE INHIBITOR                  |
| 1CQH | HIGH RESOLUTION SOLUTION NMR STRUCTURE OF MIXED DISULFIDE INTERMEDIATE BETWEEN HUMAN THIOREDOXIN (C35A, C62A, C69A, C73A) MUTANT AND A 13 RESIDUE PEPTIDE COMPRISING ITS TARGET SITE IN HUMAN REF-1 (RESIDUES 59-71 OF THE P50 SUBUNIT OF NFKB), NMR, MINIMIZED AVERAGE STRUCTURE | COMPLEX (ELECTRON TRANSPORT/PEPTIDE) |
| 1CQI | CRYSTAL STRUCTURE OF THE COMPLEX OF ADP AND MG <sup>2+</sup> WITH DEPHOSPHORYLATED E. COLI SUCCINYL-COA SYNTHETASE                                                                                                                                                                | LIGASE                               |
| 1CQJ | CRYSTAL STRUCTURE OF DEPHOSPHORYLATED E. COLI SUCCINYL-COA SYNTHETASE                                                                                                                                                                                                             | LIGASE                               |
| 1CQT | CRYSTAL STRUCTURE OF A TERNARY COMPLEX CONTAINING AN OCA-B PEPTIDE, THE OCT-1 POU DOMAIN, AND AN OCTAMER ELEMENT                                                                                                                                                                  | GENE REGULATION/DNA                  |
| 1CR9 | CRYSTAL STRUCTURE OF THE ANTI-PRION FAB 3F4                                                                                                                                                                                                                                       | IMMUNE SYSTEM                        |
| 1CS0 | CRYSTAL STRUCTURE OF CARBAMOYL PHOSPHATE SYNTHETASE COMPLEXED AT CYS269 IN THE SMALL SUBUNIT WITH THE TETRAHEDRAL MIMIC L-GLUTAMATE GAMMA-SEMIALDEHYDE                                                                                                                            | LIGASE                               |
| 1CS4 | COMPLEX OF GS-ALPHA WITH THE CATALYTIC DOMAINS OF MAMMALIAN ADENYLYL CYCLASE: COMPLEX WITH 2'-DEOXY-ADENOSINE 3'-MONOPHOSPHATE, PYROPHOSPHATE AND MG                                                                                                                              | LYASE/LYASE/SIGNALING PROTEIN        |
| 1CSE | THE HIGH-RESOLUTION X-RAY CRYSTAL STRUCTURE OF THE COMPLEX FORMED BETWEEN SUBTILISIN CARLSBERG AND EGLIN C, AN ELASTASE INHIBITOR FROM THE LEECH HIRUDO MEDICINALIS. STRUCTURAL ANALYSIS, SUBTILISIN STRUCTURE AND INTERFACE GEOMETRY                                             | COMPLEX(SERINE PROTEINASE-INHIBITOR) |

|      |                                                                                                                                                                 |                                       |
|------|-----------------------------------------------------------------------------------------------------------------------------------------------------------------|---------------------------------------|
| 1CSO | CRYSTAL STRUCTURE OF THE OMTKY3 P1 VARIANT OMTKY3-ILE18I IN COMPLEX WITH SGPB                                                                                   | HYDROLASE/HYDROLASE INHIBITOR         |
| 1CSZ | SYK TYROSINE KINASE C-TERMINAL SH2 DOMAIN COMPLEXED WITH A PHOSHOPEPTIDE FROM THE GAMMA CHAIN OF THE HIGH AFFINITY IMMUNOGLOBIN G RECEPTOR, NMR                 | COMPLEX (PHOSPHOTRANSFERASE/PEPTIDE)  |
| 1CT0 | CRYSTAL STRUCTURE OF THE OMTKY3 P1 VARIANT OMTKY3-SER18I IN COMPLEX WITH SGPB                                                                                   | HYDROLASE/HYDROLASE INHIBITOR         |
| 1CT2 | CRYSTAL STRUCTURE OF THE OMTKY3 P1 VARIANT OMTKY3-THR18I IN COMPLEX WITH SGPB                                                                                   | HYDROLASE/HYDROLASE INHIBITOR         |
| 1CT4 | CRYSTAL STRUCTURE OF THE OMTKY3 P1 VARIANT OMTKY3-VAL18I IN COMPLEX WITH SGPB                                                                                   | HYDROLASE/HYDROLASE INHIBITOR         |
| 1CT8 | CATALYTIC ANTIBODY 7C8 COMPLEX                                                                                                                                  | IMMUNE SYSTEM                         |
| 1CTP | STRUCTURE OF THE MAMMALIAN CATALYTIC SUBUNIT OF CAMP-DEPENDENT PROTEIN KINASE AND AN INHIBITOR PEPTIDE DISPLAYS AN OPEN CONFORMATION                            | TRANSFERASE(PHOSPHOTRANSFERASE)       |
| 1CU4 | CRYSTAL STRUCTURE OF THE ANTI-PRION FAB 3F4 IN COMPLEX WITH ITS PEPTIDE EPITOPE                                                                                 | IMMUNE SYSTEM                         |
| 1CVU | CRYSTAL STRUCTURE OF ARACHIDONIC ACID BOUND TO THE CYCLOOXYGENASE ACTIVE SITE OF COX-2                                                                          | OXIDOREDUCTASE                        |
| 1CVW | CRYSTAL STRUCTURE OF ACTIVE SITE-INHIBITED HUMAN COAGULATION FACTOR VIIA (DES-GLA)                                                                              | HYDROLASE                             |
| 1CW2 | CRYSTAL STRUCTURE OF THE COMPLEX OF BACTERIAL TRYPTOPHAN SYNTHASE WITH THE TRANSITION STATE ANALOGUE INHIBITOR 4-(2-HYDROXYPHENYLSULFINYL)-BUTYLPHOSPHONIC ACID | LYASE                                 |
| 1CWD | HUMAN P56LCK TYROSINE KINASE COMPLEXED WITH PHOSPHONOPEPTIDE                                                                                                    | COMPLEX (PHOSPHOTRANSFERASE/PEPTIDE)  |
| 1CWE | HUMAN P56LCK TYROSINE KINASE COMPLEXED WITH PHOSPHONOPEPTIDE                                                                                                    | COMPLEX (PHOSPHOTRANSFERASE/PEPTIDE)  |
| 1CX9 | CRYSTAL STRUCTURE OF THE COMPLEX OF BACTERIAL TRYPTOPHAN SYNTHASE WITH THE TRANSITION STATE ANALOGUE INHIBITOR 4-(2-AMINOPHENYLTHIO)-BUTYLPHOSPHONIC ACID       | LYASE                                 |
| 1CXP | CRYOGENIC CRYSTAL STRUCTURE OF HUMAN MYELOPEROXIDASE ISOFORM C                                                                                                  | OXIDOREDUCTASE                        |
| 1CXZ | CRYSTAL STRUCTURE OF HUMAN RHOA COMPLEXED WITH THE EFFECTOR DOMAIN OF THE PROTEIN KINASE PKN/PRK1                                                               | SIGNALING PROTEIN                     |
| 1CZ8 | VASCULAR ENDOTHELIAL GROWTH FACTOR IN COMPLEX WITH AN AFFINITY MATURED ANTIBODY                                                                                 | IMMUNE SYSTEM                         |
| 1CZQ | CRYSTAL STRUCTURE OF THE D10-P1/IQN17 COMPLEX: A D-PEPTIDE INHIBITOR OF HIV-1 ENTRY BOUND TO THE GP41 COILED-COIL POCKET.                                       | VIRAL PROTEIN/VIRAL PROTEIN INHIBITOR |
| 1CZY | CRYSTAL STRUCTURE OF THE COMPLEX BETWEEN THE TRAF DOMAIN OF HUMAN TRAF2 AND AN LMP1 BINDING PEPTIDE                                                             | APOPTOSIS                             |
| 1CZZ | STRUCTURE OF TNF RECEPTOR ASSOCIATED FACTOR 2 IN COMPLEX WITH A 17-RESIDUE CD40 PEPTIDE                                                                         | APOPTOSIS                             |
| 1D00 | STRUCTURE OF TNF RECEPTOR ASSOCIATED FACTOR 2 IN COMPLEX WITH A 5-RESIDUE CD40 PEPTIDE                                                                          | APOPTOSIS                             |

|      |                                                                                                                        |                     |
|------|------------------------------------------------------------------------------------------------------------------------|---------------------|
| 1D01 | STRUCTURE OF TNF RECEPTOR ASSOCIATED FACTOR 2 IN COMPLEX WITH A HUMAN CD30 PEPTIDE                                     | APOPTOSIS           |
| 1D09 | ASPARTATE TRANSAMINASE COMPLEXED WITH N-PHOSPHONACETYL-L-ASPARTATE (PALA)                                              | TRANSFERASE         |
| 1D0A | STRUCTURE OF TNF RECEPTOR ASSOCIATED FACTOR 2 (TRAF2) IN COMPLEX WITH A HUMAN OX40 PEPTIDE                             | APOPTOSIS           |
| 1D0J | STRUCTURE OF TNF RECEPTOR ASSOCIATED FACTOR 2 IN COMPLEX WITH A M4-1BB PEPTIDE                                         | APOPTOSIS           |
| 1D2V | CRYSTAL STRUCTURE OF BROMIDE-BOUND HUMAN MYELOPEROXIDASE ISOFORM C AT PH 5.5                                           | OXIDOREDUCTASE      |
| 1D2Z | THREE-DIMENSIONAL STRUCTURE OF A COMPLEX BETWEEN THE DEATH DOMAINS OF PELLE AND TUBE                                   | APOPTOSIS           |
| 1D3B | CRYSTAL STRUCTURE OF THE D3B SUBCOMPLEX OF THE HUMAN CORE SNRNP DOMAIN AT 2.0A RESOLUTION                              | RNA BINDING PROTEIN |
| 1D3D | CRYSTAL STRUCTURE OF HUMAN ALPHA THROMBIN IN COMPLEX WITH BENZOTHIOPHENE INHIBITOR 4                                   | BLOOD CLOTTING      |
| 1D3P | CRYSTAL STRUCTURE OF HUMAN ALPHA-THROMBIN IN COMPLEX WITH BENZO[B]THIOPHENE INHIBITOR 3                                | BLOOD CLOTTING      |
| 1D3Q | CRYSTAL STRUCTURE OF HUMAN ALPHA THROMBIN IN COMPLEX WITH BENZO[B]THIOPHENE INHIBITOR 2                                | BLOOD CLOTTING      |
| 1D3T | CRYSTAL STRUCTURE OF HUMAN ALPHA THROMBIN IN COMPLEX WITH BENZO[B]THIOPHENE INHIBITOR 1                                | BLOOD CLOTTING      |
| 1D3U | TATA-BINDING PROTEIN/TRANSCRIPTION FACTOR (II)B/BRE+TATA-BOX COMPLEX FROM PYROCOCCUS WOESLI                            | GENE REGULATION/DNA |
| 1D4P | CRYSTAL STRUCTURE OF HUMAN ALPHA THROMBIN IN COMPLEX WITH 5-AMIDINOINDOLE-4-BENZYLPIPERIDINE INHIBITOR                 | BLOOD CLOTTING      |
| 1D4T | CRYSTAL STRUCTURE OF THE XLP PROTEIN SAP IN COMPLEX WITH A SLAM PEPTIDE                                                | SIGNALING PROTEIN   |
| 1D4W | CRYSTAL STRUCTURE OF THE XLP PROTEIN SAP IN COMPLEX WITH SLAM PHOSPHOPEPTIDE                                           | SIGNALING PROTEIN   |
| 1D4X | CRYSTAL STRUCTURE OF CAENORHABDITIS ELEGANS MG-ATP ACTIN COMPLEXED WITH HUMAN GELSOLIN SEGMENT 1 AT 1.75 A RESOLUTION. | CONTRACTILE PROTEIN |
| 1D5B | UNLIGANDED MATURE OXY-COPE CATALYTIC ANTIBODY                                                                          | IMMUNE SYSTEM       |
| 1D5D | THE ROLE OF PHENYLALANINE 8 IN THE STABILIZATION OF THE S PROTEIN-S PEPTIDE INTERACTION: PACKING AND CAVITIES          | HYDROLASE           |
| 1D5E | THE ROLE OF PHENYLALANINE 8 IN THE STABILIZATION OF THE S PROTEIN-S PEPTIDE INTERACTION: PACKING AND CAVITIES          | HYDROLASE           |
| 1D5H | RNASE S(F8A). MUTANT RIBONUCLEASE S.                                                                                   | HYDROLASE           |
| 1D5I | UNLIGANDED GERMLINE PRECURSOR OF AN OXY-COPE CATALYTIC ANTIBODY                                                        | IMMUNE SYSTEM       |
| 1D5L | CRYSTAL STRUCTURE OF CYANIDE-BOUND HUMAN MYELOPEROXIDASE ISOFORM C AT PH 5.5                                           | OXIDOREDUCTASE      |

|      |                                                                                                                                                                                                     |                                          |
|------|-----------------------------------------------------------------------------------------------------------------------------------------------------------------------------------------------------|------------------------------------------|
| 1D5M | X-RAY CRYSTAL STRUCTURE OF HLA-DR4 COMPLEXED WITH PEPTIDE AND SEB                                                                                                                                   | IMMUNE SYSTEM                            |
| 1D5S | CRYSTAL STRUCTURE OF CLEAVED ANTTITRYPSIN POLYMER                                                                                                                                                   | HYDROLASE INHIBITOR                      |
| 1D5Z | X-RAY CRYSTAL STRUCTURE OF HLA-DR4 COMPLEXED WITH PEPTIDOMIMETIC AND SEB                                                                                                                            | IMMUNE SYSTEM                            |
| 1D6E | CRYSTAL STRUCTURE OF HLA-DR4 COMPLEX WITH PEPTIDOMIMETIC AND SEB                                                                                                                                    | IMMUNE SYSTEM                            |
| 1D6G | MOLECULAR COMPLEX OF CHOLECYSTOKININ-8 AND N-TERMINUS OF THE CHOLECYSTOKININ A RECEPTOR BY NMR SPECTROSCOPY                                                                                         | HORMONE/GROWTH FACTOR                    |
| 1D6R | CRYSTAL STRUCTURE OF CANCER CHEMOPREVENTIVE BOWMAN-BIRK INHIBITOR IN TERNARY COMPLEX WITH BOVINE TRYPSIN AT 2.3 Å RESOLUTION. STRUCTURAL BASIS OF JANUS-FACED SERINE PROTEASE INHIBITOR SPECIFICITY | HYDROLASE                                |
| 1D6V | CONFORMATION EFFECTS IN BIOLOGICAL CATALYSIS INTRODUCED BY OXY-COPE ANTIBODY MATURATION                                                                                                             | IMMUNE SYSTEM                            |
| 1D7W | CRYSTAL STRUCTURE OF HUMAN MYELOPEROXIDASE ISOFORM C COMPLEXED WITH CYANIDE AND BROMIDE AT PH 4.0                                                                                                   | OXIDOREDUCTASE                           |
| 1D8D | CO-CRYSTAL STRUCTURE OF RAT PROTEIN FARNESYLTRANSFERASE COMPLEXED WITH A K-RAS4B PEPTIDE SUBSTRATE AND FPP ANALOG AT 2.0Å RESOLUTION                                                                | TRANSFERASE                              |
| 1D8E | ZINC-DEPLETED FTASE COMPLEXED WITH K-RAS4B PEPTIDE SUBSTRATE AND FPP ANALOG.                                                                                                                        | TRANSFERASE                              |
| 1D9K | CRYSTAL STRUCTURE OF COMPLEX BETWEEN D10 TCR AND PMHC I-AK/CA                                                                                                                                       | IMMUNE SYSTEM                            |
| 1DAN | COMPLEX OF ACTIVE SITE INHIBITED HUMAN BLOOD COAGULATION FACTOR VIIA WITH HUMAN RECOMBINANT SOLUBLE TISSUE FACTOR                                                                                   | COMPLEX(SERINE PROTEASE/COFACTOR/LIGAND) |
| 1DAZ | STRUCTURAL AND KINETIC ANALYSIS OF DRUG RESISTANT MUTANTS OF HIV-1 PROTEASE                                                                                                                         | HYDROLASE                                |
| 1DBA | THREE-DIMENSIONAL STRUCTURE OF AN ANTI-STEROID FAB' AND PROGESTERONE-FAB' COMPLEX                                                                                                                   | IMMUNOGLOBULIN                           |
| 1DBB | THREE-DIMENSIONAL STRUCTURE OF AN ANTI-STEROID FAB' AND PROGESTERONE-FAB' COMPLEX                                                                                                                   | IMMUNOGLOBULIN                           |
| 1DBJ | MOLECULAR BASIS OF CROSS-REACTIVITY AND THE LIMITS OF ANTIBODY-ANTIGEN COMPLEMENTARITY                                                                                                              | IMMUNOGLOBULIN                           |
| 1DBK | MOLECULAR BASIS OF CROSS-REACTIVITY AND THE LIMITS OF ANTIBODY-ANTIGEN COMPLEMENTARITY                                                                                                              | IMMUNOGLOBULIN                           |
| 1DBM | MOLECULAR BASIS OF CROSS-REACTIVITY AND THE LIMITS OF ANTIBODY-ANTIGEN COMPLEMENTARITY                                                                                                              | IMMUNOGLOBULIN                           |
| 1DCE | CRYSTAL STRUCTURE OF RAB GERANYLGERANYLTRANSFERASE FROM RAT BRAIN                                                                                                                                   | TRANSFERASE                              |
| 1DD3 | CRYSTAL STRUCTURE OF RIBOSOMAL PROTEIN L12 FROM THERMOTOGA MARITIMA                                                                                                                                 | RIBOSOME                                 |
| 1DD4 | CRYSTAL STRUCTURE OF RIBOSOMAL PROTEIN L12 FROM THERMOTOGA MARITIM                                                                                                                                  | RIBOSOME                                 |

|      |                                                                                                                                                                         |                                      |
|------|-------------------------------------------------------------------------------------------------------------------------------------------------------------------------|--------------------------------------|
| 1DDH | MHC CLASS I H-2DD HEAVY CHAIN COMPLEXED WITH BETA-2 MICROGLOBULIN AND AN IMMUNODOMINANT PEPTIDE P18-I10 FROM THE HUMAN IMMUNODEFICIENCY VIRUS ENVELOPE GLYCOPROTEIN 120 | COMPLEX (HISTOCOMPATIBILITY/ANTIGEN) |
| 1DE4 | HEMOCHROMATOSIS PROTEIN HFE COMPLEXED WITH TRANSFERRIN RECEPTOR                                                                                                         | METAL TRANSPORT INHIBITOR/RECEPTOR   |
| 1DE7 | INTERACTION OF FACTOR XIII ACTIVATION PEPTIDE WITH ALPHA-THROMBIN: CRYSTAL STRUCTURE OF THE ENZYME-SUBSTRATE COMPLEX                                                    | HYDROLASE/BLOOD CLOTTING             |
| 1DEE | CRYSTAL STRUCTURE AT 2.7A RESOLUTION OF A COMPLEX BETWEEN A STAPHYLOCOCCUS AUREUS DOMAIN AND A FAB FRAGMENT OF A HUMAN IGM ANTIBODY                                     | IMMUNE SYSTEM                        |
| 1DEI | DESHEPTAPEPTIDE (B24-B30) INSULIN                                                                                                                                       | HORMONE                              |
| 1DEJ | CRYSTAL STRUCTURE OF A DICTYOSTELIUM/TETRAHYMENA CHIMERA ACTIN (MUTANT 646: Q228K/T229A/A230Y/A231K/S232E/E360H) IN COMPLEX WITH HUMAN GELSOLIN SEGMENT 1               | CONTRACTILE PROTEIN                  |
| 1DEV | CRYSTAL STRUCTURE OF SMAD2 MH2 DOMAIN BOUND TO THE SMAD-BINDING DOMAIN OF SARA                                                                                          | SIGNALING PROTEIN                    |
| 1DF0 | CRYSTAL STRUCTURE OF M-CALPAIN                                                                                                                                          | HYDROLASE                            |
| 1DFB | STRUCTURE OF A HUMAN MONOCLONAL ANTIBODY FAB FRAGMENT AGAINST GP41 OF HUMAN IMMUNODEFICIENCY VIRUS TYPE I                                                               | IMMUNOGLOBULIN                       |
| 1DFJ | RIBONUCLEASE INHIBITOR COMPLEXED WITH RIBONUCLEASE A                                                                                                                    | COMPLEX (ENDONUCLEASE/INHIBITOR)     |
| 1DFK | NUCLEOTIDE-FREE SCALLOP MYOSIN S1-NEAR RIGOR STATE                                                                                                                      | CONTRACTILE PROTEIN                  |
| 1DFL | SCALLOP MYOSIN S1 COMPLEXED WITH MGADP:VANADATE-TRANSITION STATE                                                                                                        | CONTRACTILE PROTEIN                  |
| 1DGH | HUMAN ERYTHROCYTE CATALASE 3-AMINO-1,2,4-TRIAZOLE COMPLEX                                                                                                               | OXIDOREDUCTASE                       |
| 1DGR | REFINED CRYSTAL STRUCTURE OF CANAVALIN FROM JACK BEAN                                                                                                                   | PLANT PROTEIN                        |
| 1DGW | STRUCTURE OF THE RHOMBOHEDRAL CRYSTAL OF CANAVALIN FROM JACK BEAN                                                                                                       | PLANT PROTEIN                        |
| 1DHK | STRUCTURE OF PORCINE PANCREATIC ALPHA-AMYLASE                                                                                                                           | COMPLEX (HYDROLASE/INHIBITOR)        |
| 1DII | CRYSTAL STRUCTURE OF P-CRESOL METHYLHYDROXYLASE AT 2.5 A RESOLUTION                                                                                                     | OXIDOREDUCTASE                       |
| 1DIO | DIOL DEHYDRATASE-CYANOCOBALAMIN COMPLEX FROM KLEBSIELLA OXYTOCA                                                                                                         | LYASE                                |
| 1DIQ | CRYSTAL STRUCTURE OF P-CRESOL METHYLHYDROXYLASE WITH SUBSTRATE BOUND                                                                                                    | OXIDOREDUCTASE                       |
| 1DIT | COMPLEX OF A DIVALENT INHIBITOR WITH THROMBIN                                                                                                                           | COMPLEX (HYDROLASE/INHIBITOR)        |
| 1DJ7 | CRYSTAL STRUCTURE OF FERREDOXIN THIOREDOXIN REDUCTASE                                                                                                                   | ELECTRON TRANSPORT                   |
| 1DJS | LIGAND-BINDING PORTION OF FIBROBLAST GROWTH FACTOR RECEPTOR 2 IN COMPLEX WITH FGF1                                                                                      | HORMONE/GROWTH FACTOR/RECEPTOR       |
| 1DKD | CRYSTAL STRUCTURE OF A GROEL (APICAL DOMAIN) AND A DODECAMERIC PEPTIDE COMPLEX                                                                                          | CHAPERONE                            |
| 1DKE | NI BETA HEME HUMAN HEMOGLOBIN                                                                                                                                           | OXYGEN STORAGE/TRANSPORT             |



|      |                                                                                                                           |                                       |
|------|---------------------------------------------------------------------------------------------------------------------------|---------------------------------------|
| 1DKF | CRYSTAL STRUCTURE OF A HETERODIMERIC COMPLEX OF RAR AND RXR LIGAND-BINDING DOMAINS                                        | HORMONE/GROWTH FACTOR RECEPTOR        |
| 1DKG | CRYSTAL STRUCTURE OF THE NUCLEOTIDE EXCHANGE FACTOR GRPE BOUND TO THE ATPASE DOMAIN OF THE MOLECULAR CHAPERONE DNAK       | COMPLEX (HSP24/HSP70)                 |
| 1DKX | THE SUBSTRATE BINDING DOMAIN OF DNAK IN COMPLEX WITH A SUBSTRATE PEPTIDE, DETERMINED FROM TYPE 1 SELENOMETHIONYL CRYSTALS | COMPLEX (MOLECULAR CHAPERONE/PEPTIDE) |
| 1DKY | THE SUBSTRATE BINDING DOMAIN OF DNAK IN COMPLEX WITH A SUBSTRATE PEPTIDE, DETERMINED FROM TYPE 2 NATIVE CRYSTALS          | COMPLEX (MOLECULAR CHAPERONE/PEPTIDE) |
| 1DKZ | THE SUBSTRATE BINDING DOMAIN OF DNAK IN COMPLEX WITH A SUBSTRATE PEPTIDE, DETERMINED FROM TYPE 1 NATIVE CRYSTALS          | COMPLEX (MOLECULAR CHAPERONE/PEPTIDE) |
| 1DLH | CRYSTAL STRUCTURE OF THE HUMAN CLASS II MHC PROTEIN HLA-DR1 COMPLEXED WITH AN INFLUENZA VIRUS PEPTIDE                     | HISTOCOMPATIBILITY ANTIGEN            |
| 1DLO | HUMAN IMMUNODEFICIENCY VIRUS TYPE 1                                                                                       | NUCLEOTIDYLTRANSFERASE                |
| 1DM0 | SHIGA TOXIN                                                                                                               | TOXIN                                 |
| 1DM4 | SER195ALA MUTANT OF HUMAN THROMBIN COMPLEXED WITH FIBRINOPEPTIDE A (7-16)                                                 | HYDROLASE                             |
| 1DML | CRYSTAL STRUCTURE OF HERPES SIMPLEX UL42 BOUND TO THE C-TERMINUS OF HSV POL                                               | DNA BINDING PROTEIN/TRANSFERASE       |
| 1DN0 | STRUCTURE OF THE FAB FRAGMENT FROM A HUMAN IGM COLD AGGLUTININ                                                            | IMMUNE SYSTEM                         |
| 1DN2 | FC FRAGMENT OF HUMAN IGG1 IN COMPLEX WITH AN ENGINEERED 13 RESIDUE PEPTIDE DCAWHLGELVWCT-NH2                              | IMMUNE SYSTEM                         |
| 1DNU | STRUCTURAL ANALYSES OF HUMAN MYELOPEROXIDASE-THIOCYANATE COMPLEX                                                          | OXIDOREDUCTASE                        |
| 1DNW | HUMAN MYELOPEROXIDASE-CYANIDE-THIOCYANATE COMPLEX                                                                         | OXIDOREDUCTASE                        |
| 1DOA | STRUCTURE OF THE RHO FAMILY GTP-BINDING PROTEIN CDC42 IN COMPLEX WITH THE MULTIFUNCTIONAL REGULATOR RHOGDI                | CELL CYCLE                            |
| 1DOJ | CRYSTAL STRUCTURE OF HUMAN ALPHA-THROMBIN*RWJ-51438 COMPLEX AT 1.7 Å                                                      | HYDROLASE/HYDROLASE INHIBITOR         |
| 1DOW | CRYSTAL STRUCTURE OF A CHIMERA OF BETA-CATENIN AND ALPHA-CATENIN                                                          | CELL ADHESION                         |
| 1DP5 | THE STRUCTURE OF PROTEINASE A COMPLEXED WITH A IA3 MUTANT INHIBITOR                                                       | HYDROLASE/HYDROLASE INHIBITOR         |
| 1DPH | CONFORMATIONAL CHANGES IN CUBIC INSULIN CRYSTALS IN THE PH RANGE 7-11                                                     | HORMONE                               |
| 1DPJ | THE STRUCTURE OF PROTEINASE A COMPLEXED WITH IA3 PEPTIDE INHIBITOR                                                        | HYDROLASE/HYDROLASE INHIBITOR         |
| 1DPP | DIPEPTIDE BINDING PROTEIN COMPLEX WITH GLYCYL-L-LEUCINE                                                                   | COMPLEX (BINDING PROTEIN/PEPTIDE)     |
| 1DQJ | CRYSTAL STRUCTURE OF THE ANTI-LYSOZYME ANTIBODY HYHEL-63 COMPLEXED WITH HEN EGG WHITE LYSOZYME                            | IMMUNE SYSTEM/HYDROLASE               |
| 1DQM | CRYSTAL STRUCTURE OF ANTI-LYSOZYME ANTIBODY                                                                               | IMMUNE SYSTEM                         |

|      |                                                                                                                                                              |                                 |
|------|--------------------------------------------------------------------------------------------------------------------------------------------------------------|---------------------------------|
| 1DQQ | CRYSTAL STRUCTURE OF ANTI-LYSOZYME ANTIBODY HYHEL-63                                                                                                         | IMMUNE SYSTEM                   |
| 1DS2 | CRYSTAL STRUCTURE OF SGPB:OMTKY3-COO-LEU181                                                                                                                  | HYDROLASE/HYDROLASE INHIBITOR   |
| 1DS5 | DIMERIC CRYSTAL STRUCTURE OF THE ALPHA SUBUNIT IN COMPLEX WITH TWO BETA PEPTIDES MIMICKING THE ARCHITECTURE OF THE TETRAMERIC PROTEIN KINASE CK2 HOLOENZYME. | TRANSFERASE                     |
| 1DS6 | CRYSTAL STRUCTURE OF A RAC-RHOGDI COMPLEX                                                                                                                    | SIGNALING PROTEIN               |
| 1DS8 | HOTOSYNTHETIC REACTION CENTER FROM RHODOBACTER SPHAEROIDES IN THE CHARGE-NEUTRAL DQAQB STATE WITH THE PROTON TRANSFER INHIBITOR CD2+                         | PHOTOSYNTHESIS                  |
| 1DSZ | STRUCTURE OF THE RXR/RAR DNA-BINDING DOMAIN HETERODIMER IN COMPLEX WITH THE RETINOIC ACID RESPONSE ELEMENT DR1                                               | TRANSCRIPTION/DNA               |
| 1DTD | CRYSTAL STRUCTURE OF THE COMPLEX BETWEEN THE LEECH CARBOXYPEPTIDASE INHIBITOR AND THE HUMAN CARBOXYPEPTIDASE A2 (LCI-CPA2)                                   | HYDROLASE/HYDROLASE INHIBITOR   |
| 1DTQ | CRYSTAL STRUCTURE OF HIV-1 REVERSE TRANSCRIPTASE IN COMPLEX WITH PETT-1 (PETT131A94)                                                                         | HYDROLASE/TRANSFERASE           |
| 1DTT | CRYSTAL STRUCTURE OF HIV-1 REVERSE TRANSCRIPTASE IN COMPLEX WITH PETT-2 (PETT130A94)                                                                         | HYDROLASE/TRANSFERASE           |
| 1DTW | HUMAN BRANCHED-CHAIN ALPHA-KETO ACID DEHYDROGENASE                                                                                                           | OXIDOREDUCTASE                  |
| 1DUY | CRYSTAL STRUCTURE OF HLA-A*0201/OCTAMERIC TAX PEPTIDE COMPLEX                                                                                                | IMMUNE SYSTEM                   |
| 1DUZ | HUMAN CLASS I HISTOCOMPATIBILITY ANTIGEN (HLA-A 0201) IN COMPLEX WITH A NONAMERIC PEPTIDE FROM HTLV-1 TAX PROTEIN                                            | IMMUNE SYSTEM                   |
| 1DV3 | HOTOSYNTHETIC REACTION CENTER FROM RHODOBACTER SPHAEROIDES IN THE CHARGE-SEPARATED D+QAQB-STATE WITH THE PROTON TRANSFER INHIBITOR CD2+                      | PHOTOSYNTHESIS                  |
| 1DV6 | HOTOSYNTHETIC REACTION CENTER FROM RHODOBACTER SPHAEROIDES IN THE CHARGE-NEUTRAL DQAQB STATE WITH THE PROTON TRANSFER INHIBITOR ZN2+                         | PHOTOSYNTHESIS                  |
| 1DVA | CRYSTAL STRUCTURE OF THE COMPLEX BETWEEN THE PEPTIDE EXOSITE INHIBITOR E-76 AND COAGULATION FACTOR VIIA                                                      | HYDROLASE/HYDROLASE INHIBITOR   |
| 1DVF | IDIOTOPIC ANTIBODY D1.3 FV FRAGMENT-ANTIIDIOTOPIC ANTIBODY E5.2 FV FRAGMENT COMPLEX                                                                          | COMPLEX (IDIOTOPE-ANTIIDIOTOPE) |
| 1DW6 | STRUCTURAL AND KINETIC ANALYSIS OF DRUG RESISTANT MUTANTS OF HIV-1 PROTEASE                                                                                  | HYDROLASE/HYDROLASE INHIBITOR   |
| 1DX5 | CRYSTAL STRUCTURE OF THE THROMBIN-THROMBOMODULIN COMPLEX                                                                                                     | SERINE PROTEINASE               |
| 1DXP | INHIBITION OF THE HEPATITIS C VIRUS NS3/4A PROTEASE. THE CRYSTAL STRUCTURES OF TWO PROTEASE-INHIBITOR COMPLEXES (APO STRUCTURE)                              | SERINE PROTEASE                 |
| 1DXR | PHOTOSYNTHETIC REACTION CENTER FROM RHODOPSEUDOMONAS VIRIDIS-HIS L168 PHE MUTANT (TERBUTRYN COMPLEX)                                                         | PHOTOSYNTHETIC REACTION CENTER  |
| 1DXT | HIGH-RESOLUTION X-RAY STUDY OF DEOXY RECOMBINANT HUMAN HEMOGLOBINS SYNTHESIZED FROM BETA-GLOBINS HAVING MUTATED AMINO TERMINI                                | OXYGEN TRANSPORT                |

|          |                                                                                                                                          |                                         |
|----------|------------------------------------------------------------------------------------------------------------------------------------------|-----------------------------------------|
| 1DXU     | HIGH-RESOLUTION X-RAY STUDY OF DEOXY RECOMBINANT HUMAN HEMOGLOBINS SYNTHESIZED FROM BETA-GLOBINS HAVING MUTATED AMINO TERMINI            | OXYGEN TRANSPORT                        |
| 1DXV     | HIGH-RESOLUTION X-RAY STUDY OF DEOXY RECOMBINANT HUMAN HEMOGLOBINS SYNTHESIZED FROM BETA-GLOBINS HAVING MUTATED AMINO TERMINI            | OXYGEN TRANSPORT                        |
| 1DY8     | INHIBITION OF THE HEPATITIS C VIRUS NS3/4A PROTEASE. THE CRYSTAL STRUCTURES OF TWO PROTEASE-INHIBITOR COMPLEXES (INHIBITOR II)           | SERINE PROTEASE                         |
| 1DY9     | INHIBITION OF THE HEPATITIS C VIRUS NS3/4A PROTEASE. THE CRYSTAL STRUCTURES OF TWO PROTEASE-INHIBITOR COMPLEXES (INHIBITOR I)            | SERINE PROTEASE                         |
| 1DZB     | CRYSTAL STRUCTURE OF PHAGE LIBRARY-DERIVED SINGLE-CHAIN FV FRAGMENT 1F9 IN COMPLEX WITH TURKEY EGG-WHITE LYSOZYME                        | COMPLEX (ANTIBODY ANTIGEN)              |
| 1.00E+08 | STRUCTURAL MODEL OF THE [FE]-HYDROGENASE/CYTOCHROME C553 COMPLEX COMBINING NMR AND SOFT-DOCKING                                          | HYDROGENASE                             |
| 1E0F     | CRYSTAL STRUCTURE OF THE HUMAN ALPHA-THROMBIN-HAEMADIN COMPLEX: AN EXOSITE II-BINDING INHIBITOR                                          | COAGULATION/CRYSTAL STRUCTURE/HEPARIN-B |
| 1.00E+14 | PHOTOSYNTHETIC REACTION CENTER MUTANT WITH PHE M197 REPLACED WITH ARG (CHAIN M, FM197R) AND GLY M203 REPLACED WITH ASP (CHAIN M, GM203D) | PHOTOSYNTHETIC REACTION CENTER          |
| 1E1C     | METHYLMALONYL-COA MUTASE H244A MUTANT                                                                                                    | ISOMERASE                               |
| 1E1H     | CRYSTAL STRUCTURE OF RECOMBINANT BOTULINUM NEUROTOXIN TYPE A LIGHT CHAIN, SELF-INHIBITING ZN ENDOPEPTIDASE.                              | NEUROTOXIN                              |
| 1E1Q     | BOVINE MITOCHONDRIAL F1-ATPASE AT 100K                                                                                                   | ATP PHOSPHORYLASE                       |
| 1E1R     | BOVINE MITOCHONDRIAL F1-ATPASE INHIBITED BY MG2+ADP AND ALUMINIUM FLUORIDE                                                               | ATP PHOSPHORYLASE                       |
| 1.00E+27 | NONSTANDARD PEPTIDE BINDING OF HLA-B*5101 COMPLEXED WITH HIV IMMUNODOMINANT EPITOPE KM1(LPPVVAKEI)                                       | HLA B51                                 |
| 1.00E+28 | NONSTANDARD PEPTIDE BINDING OF HLA-B*5101 COMPLEXED WITH HIV IMMUNODOMINANT EPITOPE KM2(TAFTIPSI)                                        | HLA B51                                 |
| 1E3A     | A SLOW PROCESSING PRECURSOR PENICILLIN ACYLASE FROM ESCHERICHIA COLI                                                                     | ANTIBIOTIC RESISTANCE                   |
| 1E3D     | [NIFE] HYDROGENASE FROM DESULFOVIBRIO DESULFURICANS ATCC 27774                                                                           | HYDROGENASE                             |
| 1E3U     | MAD STRUCTURE OF OXA10 CLASS D BETA-LACTAMASE                                                                                            | BETA-LACTAMASE                          |
| 1E3W     | RAT BRAIN 3-HYDROXYACYL-COA DEHYDROGENASE BINARY COMPLEX WITH NADH AND 3-KETO BUTYRATE                                                   | DEHYDROGENASE                           |
| 1.00E+44 | RIBONUCLEASE DOMAIN OF COLICIN E3 IN COMPLEX WITH ITS IMMUNITY PROTEIN                                                                   | RIBONUCLEASE                            |
| 1E4E     | D-ALANYL-D-LACATE LIGASE                                                                                                                 | LIGASE                                  |
| 1E4K     | CRYSTAL STRUCTURE OF SOLUBLE HUMAN IGG1 FC FRAGMENT-FC-GAMMA RECEPTOR III COMPLEX                                                        | COMPLEX                                 |
| 1E4W     | CROSSREACTIVE BINDING OF A CIRCULARIZED PEPTIDE TO AN ANTI-                                                                              | COMPLEX (ANTIBODY/ANTIGEN)              |

| TGFALPHA ANTIBODY FAB-FRAGMENT |                                                                                                                                      |                                       |
|--------------------------------|--------------------------------------------------------------------------------------------------------------------------------------|---------------------------------------|
| 1E4X                           | CROSSREACTIVE BINDING OF A CIRCULARIZED PEPTIDE TO AN ANTI-TGFALPHA ANTIBODY FAB-FRAGMENT                                            | COMPLEX (ANTIBODY/ANTIGEN)            |
| 1.00E+50                       | AML1/CBF COMPLEX                                                                                                                     | TRANSCRIPTION FACTOR                  |
| 1E6D                           | PHOTOSYNTHETIC REACTION CENTER MUTANT WITH TRP M115 REPLACED WITH PHE (CHAIN M, WM115F) PHE M197 REPLACED WITH ARG (CHAIN M, FM197R) | PHOTOSYNTHETIC REACTION CENTER        |
| 1E6E                           | DRENODOXIN REDUCTASE/ADRENODOXIN COMPLEX OF MITOCHONDRIAL P450 SYSTEMS                                                               | OXIDOREDUCTASE                        |
| 1E6O                           | CRYSTAL STRUCTURE OF FAB13B5 AGAINST HIV-1 CAPSID PROTEIN P24                                                                        | IMMUNOGLOBULIN                        |
| 1E6V                           | METHYL-COENZYME M REDUCTASE FROM METHANOPYRUS KANDLERI                                                                               | OXIDOREDUCTASE                        |
| 1E6Y                           | METHYL-COENZYME M REDUCTASE FROM METHANOSARCINA BARKERI                                                                              | OXIDOREDUCTASE                        |
| 1E7P                           | QUINOL:FUMARATE REDUCTASE FROM WOLINELLA SUCCINOGENES                                                                                | OXIDOREDUCTASE                        |
| 1.00E+80                       | ENDOTHIAPEPSIN COMPLEX WITH RENIN INHIBITOR MERCK-KGAA-EMD56133                                                                      | HYDROLASE (ACID PROTEINASE)           |
| 1E8N                           | PROLYL OLIGOPEPTIDASE FROM PORCINE BRAIN, MUTANT, COMPLEXED WITH PEPTIDE                                                             | HYDROLASE                             |
| 1E8O                           | CORE OF THE ALU DOMAIN OF THE MAMMALIAN SRP                                                                                          | SIGNALING PROTEIN/RNA                 |
| 1.00E+91                       | STRUCTURE OF THE COMPLEX OF THE MAD1-SIN3B INTERACTION DOMAINS                                                                       | EUKARYOTIC TRANSCRIPTIONAL REGULATION |
| 1.00E+94                       | HSLV-HSLU FROM E.COLI                                                                                                                | CHAPERONE                             |
| 1E9H                           | THR 160 PHOSPHORYLATED CDK2-HUMAN CYCLIN A3 COMPLEX WITH THE INHIBITOR INDIRUBIN-5-SULPHONATE BOUND                                  | COMPLEX (PROTEIN KINASE/CYCLIN)       |
| 1E9Y                           | CRYSTAL STRUCTURE OF HELICOBACTER PYLORI UREASE IN COMPLEX WITH ACETOHYDROXAMIC ACID                                                 | HYDROLASE                             |
| 1E9Z                           | CRYSTAL STRUCTURE OF HELICOBACTER PYLORI UREASE                                                                                      | HYDROLASE                             |
| 1EAK                           | CATALYTIC DOMAIN OF PROMMP-2 E404Q MUTANT                                                                                            | HYDROLYSE                             |
| 1EAP                           | CRYSTAL STRUCTURE OF A CATALYTIC ANTIBODY WITH A SERINE PROTEASE ACTIVE SITE                                                         | CATALYTIC ANTIBODY                    |
| 1EAY                           | CHEY-BINDING (P2) DOMAIN OF CHEA IN COMPLEX WITH CHEY FROM ESCHERICHIA COLI                                                          | SIGNAL TRANSDUCTION COMPLEX           |
| 1EB1                           | COMPLEX STRUCTURE OF HUMAN THROMBIN WITH N-METHYL-ARGININE INHIBITOR                                                                 | SERINE PROTEINASE                     |
| 1EBD                           | DIHYDROLIPOAMIDE DEHYDROGENASE COMPLEXED WITH THE BINDING DOMAIN OF THE DIHYDROLIPOAMIDE ACETYLASE                                   | COMPLEX (OXIDOREDUCTASE/TRANSFERASE)  |
| 1EBK                           | STRUCTURAL AND KINETIC ANALYSIS OF DRUG RESISTANT MUTANTS OF HIV-1 PROTEASE                                                          | HYDROLASE/HYDROLASE INHIBITOR         |
| 1ED3                           | CRYSTAL STRUCTURE OF RAT MINOR HISTOCOMPATIBILITY ANTIGEN COMPLEX RT1-AA/MTF-E.                                                      | IMMUNE SYSTEM                         |
| 1EE4                           | CRYSTAL STRUCTURE OF YEAST KARYOPHERIN (IMPORTIN) ALPHA IN                                                                           | TRANSPORT PROTEIN                     |

## A COMPLEX WITH A C-MYC NLS PEPTIDE

|      |                                                                                                                                    |                                     |
|------|------------------------------------------------------------------------------------------------------------------------------------|-------------------------------------|
| 1EE5 | YEAST KARYOPHERIN (IMPORTIN) ALPHA IN A COMPLEX WITH A NUCLEOPLASMIN NLS PEPTIDE                                                   | TRANSPORT PROTEIN                   |
| 1EEO | CRYSTAL STRUCTURE OF PROTEIN TYROSINE PHOSPHATASE 1B COMPLEXED WITH ACETYL-E-L-E-F-PTYR-M-D-Y-E-NH <sub>2</sub>                    | HYDROLASE                           |
| 1EER | CRYSTAL STRUCTURE OF HUMAN ERYTHROPOIETIN COMPLEXED TO ITS RECEPTOR AT 1.9 ANGSTROMS                                               | COMPLEX (CYTOKINE/RECEPTOR)         |
| 1EET | HIV-1 REVERSE TRANSCRIPTASE IN COMPLEX WITH THE INHIBITOR MSC204                                                                   | VIRAL PROTEIN, TRANSFERASE          |
| 1EEY | CRYSTAL STRUCTURE DETERMINATION OF HLA A2 COMPLEXED TO PEPTIDE GP2 WITH THE SUBSTITUTION (I2L/V5L/L9V)                             | IMMUNE SYSTEM                       |
| 1EEZ | CRYSTAL STRUCTURE DETERMINATION OF HLA-A2.1 COMPLEXED TO GP2 PEPTIDE VARIANT(I2L/V5L)                                              | IMMUNE SYSTEM                       |
| 1EF1 | CRYSTAL STRUCTURE OF THE MOESIN FERM DOMAIN/TAIL DOMAIN COMPLEX                                                                    | MEMBRANE PROTEIN                    |
| 1EF2 | CRYSTAL STRUCTURE OF MANGANESE-SUBSTITUTED KLEBSIELLA AEROGENES UREASE                                                             | HYDROLASE                           |
| 1EFN | HIV-1 NEF PROTEIN IN COMPLEX WITH R96I MUTANT FYN SH3 DOMAIN                                                                       | COMPLEX (SH3 DOMAIN/VIRAL ENHANCER) |
| 1EFP | ELECTRON TRANSFER FLAVOPROTEIN (ETF) FROM PARACOCCLUS DENITRIFICANS                                                                | ELECTRON TRANSPORT                  |
| 1EFR | BOVINE MITOCHONDRIAL F1-ATPASE COMPLEXED WITH THE PEPTIDE ANTIBIOTIC EFRAPEPTIN                                                    | COMPLEX (ION TRANSPORT/INHIBITOR)   |
| 1EFU | ELONGATION FACTOR COMPLEX EF-TU/EF-TS FROM ESCHERICHIA COLI                                                                        | COMPLEX (TWO ELONGATION FACTORS)    |
| 1EFV | THREE-DIMENSIONAL STRUCTURE OF HUMAN ELECTRON TRANSFER FLAVOPROTEIN TO 2.1 A RESOLUTION                                            | ELECTRON TRANSPORT                  |
| 1EFX | STRUCTURE OF A COMPLEX BETWEEN THE HUMAN NATURAL KILLER CELL RECEPTOR KIR2DL2 AND A CLASS I MHC LIGAND HLA-CW3                     | IMMUNE SYSTEM                       |
| 1EG4 | STRUCTURE OF A DYSTROPHIN WW DOMAIN FRAGMENT IN COMPLEX WITH A BETA-DYSTROGLYCAN PEPTIDE                                           | STRUCTURAL PROTEIN                  |
| 1EG9 | NAPHTHALENE 1,2-DIOXYGENASE WITH INDOLE BOUND IN THE ACTIVE SITE.                                                                  | OXIDOREDUCTASE                      |
| 1EGJ | DOMAIN 4 OF THE BETA COMMON CHAIN IN COMPLEX WITH AN ANTIBODY                                                                      | IMMUNE SYSTEM                       |
| 1EGM | CRYSTAL STRUCTURE OF DIOL DEHYDRATASE-CYANOCOBALAMIN COMPLEX AT 100K.                                                              | LYASE                               |
| 1EGP | PROTEINASE INHIBITOR EGLIN C WITH HYDROLYSED REACTIVE CENTER                                                                       | PROTEINASE INHIBITOR                |
| 1EGV | CRYSTAL STRUCTURE OF THE DIOL DEHYDRATASE-ADENINYLPENTYLCOBALAMIN COMPLEX FROM KLEBSIELLA OXYTOCA UNDER THE ILLUMINATED CONDITION. | LYASE                               |
| 1EHK | CRYSTAL STRUCTURE OF THE ABERRANT BA3-CYTOCHROME-C OXIDASE FROM THERMUS THERMOPHILUS                                               | OXIDOREDUCTASE                      |
| 1EHL | 64M-2 ANTIBODY FAB COMPLEXED WITH D(5HT)(6-4)T                                                                                     | IMMUNE SYSTEM                       |

|       |                                                                                                                      |                            |
|-------|----------------------------------------------------------------------------------------------------------------------|----------------------------|
| 1E1Y  | THE CRYSTAL STRUCTURE OF PHENYLALANYL-TRNA SYNTHETASE FROM THERMUS THERMOPHILUS COMPLEXED WITH COGNATE TRNAPHE       | LIGASE/RNA                 |
| 1E1J4 | COCRYSTAL STRUCTURE OF EIF4E/4E-BP1 PEPTIDE                                                                          | TRANSLATION                |
| 1E1J6 | REOVIRUS CORE                                                                                                        | VIRUS                      |
| 1E1J7 | CRYSTAL STRUCTURE OF UNACTIVATED TOBACCO RUBISCO WITH BOUND PHOSPHATE IONS                                           | LYASE                      |
| 1E1JH | EIF4E/EIF4G PEPTIDE/7-METHYL-GDP                                                                                     | TRANSLATION                |
| 1E1JL | MOUSE IMPORTIN ALPHA-SV40 LARGE T ANTIGEN NLS PEPTIDE COMPLEX                                                        | PROTEIN BINDING            |
| 1E1JM | CRYSTAL STRUCTURE OF THE BPTI ALA16LEU MUTANT IN COMPLEX WITH BOVINE TRYPSIN                                         | HYDROLASE/INHIBITOR        |
| 1E1JO | FAB FRAGMENT OF NEUTRALISING MONOCLONAL ANTIBODY 4C4 COMPLEXED WITH G-H LOOP FROM FMDV.                              | IMMUNE SYSTEM              |
| 1E1JR | CRYSTAL STRUCTURE OF THE D221A VARIANT OF KLEBSIELLA AEROGENES UREASE                                                | HYDROLASE                  |
| 1E1JS | CRYSTAL STRUCTURE OF THE H219N VARIANT OF KLEBSIELLA AEROGENES UREASE                                                | HYDROLASE                  |
| 1E1JT | CRYSTAL STRUCTURE OF THE H219Q VARIANT OF KLEBSIELLA AEROGENES UREASE                                                | HYDROLASE                  |
| 1E1JU | CRYSTAL STRUCTURE OF THE H320N VARIANT OF KLEBSIELLA AEROGENES UREASE                                                | HYDROLASE                  |
| 1E1JV | CRYSTAL STRUCTURE OF THE H320Q VARIANT OF KLEBSIELLA AEROGENES UREASE                                                | HYDROLASE                  |
| 1E1JW | CRYSTAL STRUCTURE OF WILD-TYPE KLEBSIELLA AEROGENES UREASE AT 298K                                                   | HYDROLASE                  |
| 1E1JX | CRYSTAL STRUCTURE OF WILD-TYPE KLEBSIELLA AEROGENES UREASE AT 100K                                                   | HYDROLASE                  |
| 1E1JY | MOUSE IMPORTIN ALPHA-NUCLEOPLASMIN NLS PEPTIDE COMPLEX                                                               | PROTEIN BINDING            |
| 1E1LR | CRYSTAL STRUCTURE OF THE TPR2A DOMAIN OF HOP IN COMPLEX WITH THE HSP90 PEPTIDE MEEVD                                 | CHAPERONE                  |
| 1E1LW | CRYSTAL STRUCTURE OF THE TPR1 DOMAIN OF HOP IN COMPLEX WITH A HSC70 PEPTIDE                                          | CHAPERONE                  |
| 1E1M8 | CRYSTAL STRUCTURE OF CHI AND PSI SUBUNIT HETERODIMER FROM DNA POL III                                                | GENE REGULATION            |
| 1E1MT | FAB ANTIBODY FRAGMENT OF AN C60 ANTIFULLERENE ANTIBODY                                                               | IMMUNE SYSTEM              |
| 1E1MU | STRUCTURE OF THE AXIN RGS-HOMOLOGOUS DOMAIN IN COMPLEX WITH A SAMP REPEAT FROM APC                                   | SIGNALING PROTEIN          |
| 1E1MV | CRYSTAL STRUCTURE OF COLICIN E9 DNASE DOMAIN WITH ITS COGNATE IMMUNITY PROTEIN IM9 (1.7 ANGSTROMS)                   | IMMUNE SYSTEM              |
| 1E1NT | X-RAY ANALYSES OF ASPARTIC PROTEINASES. THE THREE-DIMENSIONAL STRUCTURE AT 2.1 ANGSTROMS RESOLUTION OF ENDOTHAPEPSIN | HYDROLASE(ACID PROTEINASE) |

|      |                                                                                                                                          |                             |
|------|------------------------------------------------------------------------------------------------------------------------------------------|-----------------------------|
| 1EO2 | CRYSTAL STRUCTURE OF ACINETOBACTER SP. ADP1 PROTOCATECHUATE 3,4-DIOXYGENASE                                                              | OXIDOREDUCTASE              |
| 1EO8 | INFLUENZA VIRUS HEMAGGLUTININ COMPLEXED WITH A NEUTRALIZING ANTIBODY                                                                     | VIRAL PROTEIN/IMMUNE SYSTEM |
| 1EO9 | CRYSTAL STRUCTURE OF ACINETOBACTER SP. ADP1 PROTOCATECHUATE 3,4-DIOXYGENASE AT PH < 7.0                                                  | OXIDOREDUCTASE              |
| 1EOA | CRYSTAL STRUCTURE OF ACINETOBACTER SP. ADP1 PROTOCATECHUATE 3,4-DIOXYGENASE IN COMPLEX WITH CYANIDE                                      | OXIDOREDUCTASE              |
| 1EOB | CRYSTAL STRUCTURE OF ACINETOBACTER SP. ADP1 PROTOCATECHUATE 3,4-DIOXYGENASE IN COMPLEX WITH 3,4-DIHYDROXYBENZOATE                        | OXIDOREDUCTASE              |
| 1EOC | CRYSTAL STRUCTURE OF ACINETOBACTER SP. ADP1 PROTOCATECHUATE 3,4-DIOXYGENASE IN COMPLEX WITH 4-NITROCATECHOL                              | OXIDOREDUCTASE              |
| 1EP1 | CRYSTAL STRUCTURE OF LACTOCOCCUS LACTIS DIHYDROOROTATE DEHYDROGENASE B                                                                   | OXIDOREDUCTASE              |
| 1EP2 | CRYSTAL STRUCTURE OF LACTOCOCCUS LACTIS DIHYDROOROTATE DEHYDROGENASE B COMPLEXED WITH OROTATE                                            | OXIDOREDUCTASE              |
| 1EP3 | CRYSTAL STRUCTURE OF LACTOCOCCUS LACTIS DIHYDROOROTATE DEHYDROGENASE B. DATA COLLECTED UNDER CRYOGENIC CONDITIONS.                       | OXIDOREDUCTASE              |
| 1EPL | A STRUCTURAL COMPARISON OF 21 INHIBITOR COMPLEXES OF THE ASPARTIC PROTEINASE FROM ENDOTHIA PARASITICA                                    | HYDROLASE(ACID PROTEINASE)  |
| 1EPM | A STRUCTURAL COMPARISON OF 21 INHIBITOR COMPLEXES OF THE ASPARTIC PROTEINASE FROM ENDOTHIA PARASITICA                                    | HYDROLASE(ACID PROTEINASE)  |
| 1EPN | A STRUCTURAL COMPARISON OF 21 INHIBITOR COMPLEXES OF THE ASPARTIC PROTEINASE FROM ENDOTHIA PARASITICA                                    | HYDROLASE(ACID PROTEINASE)  |
| 1EPO | DIRECT OBSERVATION BY X-RAY ANALYSIS OF THE TETRAHEDRAL "INTERMEDIATE" OF ASPARTIC PROTEINASES                                           | HYDROLASE(ACID PROTEINASE)  |
| 1EPQ | ANALYSES OF LIGAND BINDING IN FIVE ENDOTHIAPEPSIN CRYSTAL COMPLEXES AND THEIR USE IN THE DESIGN AND EVALUATION OF NOVEL RENIN INHIBITORS | HYDROLASE(ACID PROTEINASE)  |
| 1EPT | REFINED 1.8 ANGSTROMS RESOLUTION CRYSTAL STRUCTURE OF PORCINE EPSILON-TRYPSIN                                                            | HYDROLASE (SERINE PROTEASE) |
| 1EQY | COMPLEX BETWEEN RABBIT MUSCLE ALPHA-ACTIN: HUMAN GELSOLIN DOMAIN 1                                                                       | CONTRACTILE PROTEIN         |
| 1EQZ | X-RAY STRUCTURE OF THE NUCLEOSOME CORE PARTICLE AT 2.5 A RESOLUTION                                                                      | STRUCTURAL PROTEIN/DNA      |
| 1ER8 | THE ACTIVE SITE OF ASPARTIC PROTEINASES                                                                                                  | HYDROLASE (ACID PROTEINASE) |
| 1ES0 | CRYSTAL STRUCTURE OF THE MURINE CLASS II ALLELE I-A(G7) COMPLEXED WITH THE GLUTAMIC ACID DECARBOXYLASE (GAD65) PEPTIDE 207-220           | IMMUNE SYSTEM               |
| 1ES7 | COMPLEX BETWEEN BMP-2 AND TWO BMP RECEPTOR IA ECTODOMAINS                                                                                | CYTOKINE                    |
| 1ESV | COMPLEX BETWEEN LATRUNCULIN A:RABBIT MUSCLE ALPHA ACTIN:HUMAN GELSOLIN DOMAIN 1                                                          | CONTRACTILE PROTEIN         |
| 1ETZ | THE THREE-DIMENSIONAL STRUCTURE OF AN ANTI-SWEETENER FAB, NC10.14, SHOWS THE EXTENT OF STRUCTURAL DIVERSITY IN                           | IMMUNE SYSTEM               |

## ANTIGEN RECOGNITION BY IMMUNOGLOBULINS

|      |                                                                                                                                            |                                      |
|------|--------------------------------------------------------------------------------------------------------------------------------------------|--------------------------------------|
| 1EUC | CRYSTAL STRUCTURE OF DEPHOSPHORYLATED PIG HEART, GTP-SPECIFIC SUCCINYL-COA SYNTHETASE                                                      | LIGASE                               |
| 1EUI | ESCHERICHIA COLI URACIL-DNA GLYCOSYLASE COMPLEX WITH URACIL-DNA GLYCOSYLASE INHIBITOR PROTEIN                                              | COMPLEX (HYDROLASE/INHIBITOR)        |
| 1EUV | X-RAY STRUCTURE OF THE C-TERMINAL ULP1 PROTEASE DOMAIN IN COMPLEX WITH SMT3, THE YEAST ORTHOLOG OF SUMO.                                   | HYDROLASE                            |
| 1EV3 | STRUCTURE OF THE RHOMBOHEDRAL FORM OF THE M-CRESOL/INSULIN R6 HEXAMER                                                                      | HORMONE/GROWTH FACTOR                |
| 1EV6 | STRUCTURE OF THE MONOCLINIC FORM OF THE M-CRESOL/INSULIN R6 HEXAMER                                                                        | HORMONE/GROWTH FACTOR                |
| 1EVR | THE STRUCTURE OF THE RESORCINOL/INSULIN R6 HEXAMER                                                                                         | HORMONE/GROWTH FACTOR                |
| 1EVT | CRYSTAL STRUCTURE OF FGF1 IN COMPLEX WITH THE EXTRACELLULAR LIGAND BINDING DOMAIN OF FGF RECEPTOR 1 (FGFR1)                                | GROWTH FACTOR/GROWTH FACTOR RECEPTOR |
| 1EWP | CRUZAIN BOUND TO MOR-LEU-HPQ                                                                                                               | HYDROLASE                            |
| 1EWY | ANABAENA PCC7119 FERREDOXIN:FERREDOXIN-NADP+-REDUCTASE COMPLEX                                                                             | OXIDOREDUCTASE                       |
| 1EXB | STRUCTURE OF THE CYTOPLASMIC BETA SUBUNIT-T1 ASSEMBLY OF VOLTAGE-DEPENDENT K CHANNELS                                                      | METAL TRANSPORT                      |
| 1EYS | CRYSTAL STRUCTURE OF PHOTOSYNTHETIC REACTION CENTER FROM A THERMOPHILIC BACTERIUM, THERMOCHROMATIUM TEPIDUM                                | ELECTRON TRANSPORT                   |
| 1EYX | CRYSTAL STRUCTURE OF R-PHYCOERYTHRIN AT 2.2 ANGSTROMS                                                                                      | PHOTOSYNTHESIS                       |
| 1EZQ | CRYSTAL STRUCTURE OF HUMAN COAGULATION FACTOR XA COMPLEXED WITH RPR128515                                                                  | HYDROLASE                            |
| 1EZS | CRYSTAL STRUCTURE OF ECOTIN MUTANT M84R, W67A, G68A, Y69A, D70A BOUND TO RAT ANIONIC TRYPSIN II                                            | HYDROLASE/INHIBITOR                  |
| 1EZU | ECOTIN Y69F, D70P BOUND TO D102N TRYPSIN                                                                                                   | HYDROLASE/INHIBITOR                  |
| 1EZV | STRUCTURE OF THE YEAST CYTOCHROME BC1 COMPLEX CO-CRYSTALLIZED WITH AN ANTIBODY FV-FRAGMENT                                                 | OXIDOREDUCTASE/ELECTRON TRANSPORT    |
| 1EZX | CRYSTAL STRUCTURE OF A SERPIN:PROTEASE COMPLEX                                                                                             | HYDROLASE/HYDROLASE INHIBITOR        |
| 1EZZ | CRYSTAL STRUCTURE OF E. COLI ASPARTATE TRANSCARBAMOYLASE P268A MUTANT IN THE T-STATE                                                       | TRANSFERASE                          |
| 1F02 | CRYSTAL STRUCTURE OF C-TERMINAL 282-RESIDUE FRAGMENT OF INTIMIN IN COMPLEX WITH TRANSLOCATED INTIMIN RECEPTOR (TIR) INTIMIN-BINDING DOMAIN | CELL ADHESION                        |
| 1F0R | CRYSTAL STRUCTURE OF HUMAN COAGULATION FACTOR XA COMPLEXED WITH RPR208815                                                                  | HYDROLASE                            |
| 1F0S | CRYSTAL STRUCTURE OF HUMAN COAGULATION FACTOR XA COMPLEXED WITH RPR208707                                                                  | HYDROLASE                            |
| 1F11 | F124 FAB FRAGMENT FROM A MONOCLONAL ANTI-PRES2 ANTIBODY                                                                                    | IMMUNE SYSTEM                        |
| 1F1B | CRYSTAL STRUCTURE OF E. COLI ASPARTATE TRANSCARBAMOYLASE P268A MUTANT IN THE R-STATE IN THE PRESENCE OF N-                                 | TRANSFERASE                          |



## PHOSPHONACETYL-L-ASPARTATE

|      |                                                                                                                                                                                  |                               |
|------|----------------------------------------------------------------------------------------------------------------------------------------------------------------------------------|-------------------------------|
| 1F1J | CRYSTAL STRUCTURE OF CASPASE-7 IN COMPLEX WITH ACETYL-ASP-GLU-VAL-ASP-CHO                                                                                                        | HYDROLASE, APOPTOSIS          |
| 1F1W | SRC SH2 THREIF1TRP MUTANT COMPLEXED WITH THE PHOSHOPEPTIDE S(PTR)VNVQN                                                                                                           | TRANSFERASE                   |
| 1F2R | NMR STRUCTURE OF THE HETERODIMERIC COMPLEX BETWEEN CAD DOMAINS OF CAD AND ICAD                                                                                                   | DNA BINDING PROTEIN           |
| 1F2S | CRYSTAL STRUCTURE OF THE COMPLEX FORMED BETWEEN BOVINE BETA-TRYPSIN AND MCTI-A, A TRYPSIN INHIBITOR OF SQUASH FAMILY AT 1.8 Å RESOLUTION                                         | HYDROLASE/HYDROLASE INHIBITOR |
| 1F2T | CRYSTAL STRUCTURE OF ATP-FREE RAD50 ABC-ATPASE                                                                                                                                   | REPLICATION                   |
| 1F2U | CRYSTAL STRUCTURE OF RAD50 ABC-ATPASE                                                                                                                                            | REPLICATION                   |
| 1F34 | CRYSTAL STRUCTURE OF ASCARIS PEPSIN INHIBITOR-3 BOUND TO PORCINE PEPSIN                                                                                                          | HYDROLASE/HYDROLASE INHIBITOR |
| 1F3D | CATALYTIC ANTIBODY 4B2 IN COMPLEX WITH ITS AMIDINIUM HAPTEN.                                                                                                                     | IMMUNE SYSTEM                 |
| 1F3J | HISTOCOMPATIBILITY ANTIGEN I-AG7                                                                                                                                                 | IMMUNE SYSTEM                 |
| 1F3M | CRYSTAL STRUCTURE OF HUMAN SERINE/THREONINE KINASE PAK1                                                                                                                          | TRANSFERASE                   |
| 1F3U | CRYSTAL STRUCTURE OF THE RAP30/74 INTERACTION DOMAINS OF HUMAN TFIIIF                                                                                                            | TRANSCRIPTION                 |
| 1F3V | CRYSTAL STRUCTURE OF THE COMPLEX BETWEEN THE N-TERMINAL DOMAIN OF TRADD AND THE TRAF DOMAIN OF TRAF2                                                                             | APOPTOSIS                     |
| 1F45 | HUMAN INTERLEUKIN-12                                                                                                                                                             | CYTOKINE/CYTPKINE             |
| 1F47 | THE BACTERIAL CELL-DIVISION PROTEIN ZIPA AND ITS INTERACTION WITH AN FTSZ FRAGMENT REVEALED BY X-RAY CRYSTALLOGRAPHY                                                             | CELL CYCLE                    |
| 1F4X | CRYSTAL STRUCTURE OF AN ANTI-CARBOHYDRATE ANTIBODY DIRECTED AGAINST VIBRIO CHOLERAE O1 IN COMPLEX WITH ANTIGEN                                                                   | IMMUNE SYSTEM                 |
| 1F4Y | CRYSTAL STRUCTURE OF AN ANTI-CARBOHYDRATE ANTIBODY DIRECTED AGAINST VIBRIO CHOLERAE O1 IN COMPLEX WITH ANTIGEN                                                                   | IMMUNE SYSTEM                 |
| 1F51 | A TRANSIENT INTERACTION BETWEEN TWO PHOSPHORELAY PROTEINS TRAPPED IN A CRYSTAL LATTICE REVEALS THE MECHANISM OF MOLECULAR RECOGNITION AND PHOSPHOTRANSFER IN SINGAL TRANSDUCTION | TRANSFERASE                   |
| 1F58 | IGG1 FAB FRAGMENT (58.2) COMPLEX WITH 24-RESIDUE PEPTIDE (RESIDUES 308-333 OF HIV-1 GP120 (MN ISOLATE) WITH ALA TO AIB SUBSTITUTION AT POSITION 323                              | VIRAL PROTEIN/IMMUNE SYSTEM   |
| 1F59 | IMPORTIN-BETA-FXFG NUCLEOPORIN COMPLEX                                                                                                                                           | TRANSPORT PROTEIN RECEPTOR    |
| 1F5Q | CRYSTAL STRUCTURE OF MURINE GAMMA HERPESVIRUS CYCLIN COMPLEXED TO HUMAN CYCLIN DEPENDENT KINASE 2                                                                                | TRANSFERASE                   |
| 1F60 | CRYSTAL STRUCTURE OF THE YEAST ELONGATION FACTOR COMPLEX EEF1A:EEF1BA                                                                                                            | TRANSLATION                   |
| 1F66 | 2.6 Å CRYSTAL STRUCTURE OF A NUCLEOSOME CORE PARTICLE CONTAINING THE VARIANT HISTONE H2A.Z                                                                                       | STRUCTURAL PROTEIN/DNA        |

|      |                                                                                                                                          |                                        |
|------|------------------------------------------------------------------------------------------------------------------------------------------|----------------------------------------|
| 1F6F | CRYSTAL STRUCTURE OF THE TERNARY COMPLEX BETWEEN OVINE PLACENTAL LACTOGEN AND THE EXTRACELLULAR DOMAIN OF THE RAT PROLACTIN RECEPTOR     | HORMONE/GROWTH FACTOR/HORMONE RECEPTOR |
| 1F6M | CRYSTAL STRUCTURE OF A COMPLEX BETWEEN THIOREDOXIN REDUCTASE, THIOREDOXIN, AND THE NADP+ ANALOG, AADP+                                   | OXIDOREDUCTASE                         |
| 1F6N | CRYSTAL STRUCTURE ANALYSIS OF THE MUTANT REACTION CENTER PRO L209-> TYR FROM THE PHOTOSYNTHETIC PURPLE BACTERIUM RHODOBACTER SPHAEROIDES | PHOTOSYNTHESIS                         |
| 1F7A | HOW DOES A SYMMETRIC DIMER RECOGNIZE AN ASYMMETRIC SUBSTRATE? A SUBSTRATE COMPLEX OF HIV-1 PROTEASE.                                     | HYDROLASE                              |
| 1F80 | HOLO-(ACYL CARRIER PROTEIN) SYNTHASE IN COMPLEX WITH HOLO-(ACYL CARRIER PROTEIN)                                                         | TRANSFERASE                            |
| 1F8A | STRUCTURAL BASIS FOR THE PHOSPHOSERINE-PROLINE RECOGNITION BY GROUP IV WW DOMAINS                                                        | ISOMERASE                              |
| 1F8T | FAB (LNKB-2) OF MONOCLONAL ANTIBODY, CRYSTAL STRUCTURE                                                                                   | IMMUNE SYSTEM                          |
| 1F8U | CRYSTAL STRUCTURE OF MUTANT E202Q OF HUMAN ACETYLCHOLINESTERASE COMPLEXED WITH GREEN MAMBA VENOM PEPTIDE FASCICULIN-II                   | HYDROLASE/TOXIN                        |
| 1F8V | THE STRUCTURE OF PARIACOTO VIRUS REVEALS A DODECAHEDRAL CAGE OF DUPLEX RNA                                                               | VIRUS/RNA                              |
| 1F90 | FAB FRAGMENT OF MONOCLONAL ANTIBODY (LNKB-2) AGAINST HUMAN INTERLEUKIN-2 IN COMPLEX WITH ANTIGENIC PEPTIDE                               | IMMUNE SYSTEM                          |
| 1F93 | CRYSTAL STRUCTURE OF A COMPLEX BETWEEN THE DIMERIZATION DOMAIN OF HNF-1 ALPHA AND THE COACTIVATOR DCOH                                   | TRANSCRIPTION                          |
| 1F95 | SOLUTION STRUCTURE OF DYNEIN LIGHT CHAIN 8 (DLC8) AND BIM PEPTIDE COMPLEX                                                                | CONTRACTILE PROTEIN/APOPTOSIS          |
| 1F99 | CRYSTAL STRUCTURE OF R-PHYCOCYANIN FROM POLYSIPHONIA AT 2.4 Å RESOLUTION                                                                 | PHOTOSYNTHESIS                         |
| 1F9E | CASPASE-8 SPECIFICITY PROBED AT SUBSITE S4: CRYSTAL STRUCTURE OF THE CASPASE-8-Z-DEVD-CHO                                                | APOPTOSIS                              |
| 1FAI | THREE-DIMENSIONAL STRUCTURE OF TWO CRYSTAL FORMS OF FAB R19.9, FROM A MONOCLONAL ANTI-ARSONATE ANTIBODY                                  | IMMUNOGLOBULIN                         |
| 1FAK | HUMAN TISSUE FACTOR COMPLEXED WITH COAGULATION FACTOR VIIA INHIBITED WITH A BPTI-MUTANT                                                  | BLOOD CLOTTING                         |
| 1FAP | THE STRUCTURE OF THE IMMUNOPHILIN-IMMUNOSUPPRESSANT FKBP12-RAPAMYCIN COMPLEX INTERACTING WITH HUMAN FRAP                                 | COMPLEX (ISOMERASE/KINASE)             |
| 1FAV | THE STRUCTURE OF AN HIV-1 SPECIFIC CELL ENTRY INHIBITOR IN COMPLEX WITH THE HIV-1 GP41 TRIMERIC CORE                                     | VIRAL PROTEIN                          |
| 1FAW | GRAYLAG GOOSE HEMOGLOBIN (OXY FORM)                                                                                                      | OXYGEN STORAGE/TRANSPORT               |
| 1FBI | CRYSTAL STRUCTURE OF A CROSS-REACTION COMPLEX BETWEEN FAB F9.13.7 AND GUINEA-FOWL LYSOZYME                                               | COMPLEX (ANTIBODY/ANTIGEN)             |
| 1FBV | STRUCTURE OF A CBL-UBCH7 COMPLEX: RING DOMAIN FUNCTION IN UBIQUITIN-PROTEIN LIGASES                                                      | LIGASE                                 |

|      |                                                                                                                                                             |                                     |
|------|-------------------------------------------------------------------------------------------------------------------------------------------------------------|-------------------------------------|
| 1FCC | CRYSTAL STRUCTURE OF THE C2 FRAGMENT OF STREPTOCOCCAL PROTEIN G IN COMPLEX WITH THE FC DOMAIN OF HUMAN IGG                                                  | COMPLEX (ANTIBODY/ANTIGEN)          |
| 1FCD | THE STRUCTURE OF FLAVOCYTOCHROME C SULFIDE DEHYDROGENASE FROM A PURPLE PHOTOTROPHIC BACTERIUM CHROMATIUM VINOSUM AT 2.5 ANGSTROMS RESOLUTION                | ELECTRON TRANSPORT(FLAVOCYTOCHROME) |
| 1FCH | CRYSTAL STRUCTURE OF THE PTS1 COMPLEXED TO THE TPR REGION OF HUMAN PEX5                                                                                     | SIGNALING PROTEIN                   |
| 1FDH | STRUCTURE OF HUMAN FOETAL DEOXYHAEMOGLOBIN                                                                                                                  | OXYGEN TRANSPORT                    |
| 1FDL | CRYSTALLOGRAPHIC REFINEMENT OF THE THREE-DIMENSIONAL STRUCTURE OF THE FAB D1.3-LYSOZYME COMPLEX AT 2.5-ANGSTROMS RESOLUTION                                 | COMPLEX (ANTIBODY-ANTIGEN)          |
| 1FE8 | CRYSTAL STRUCTURE OF THE VON WILLEBRAND FACTOR A3 DOMAIN IN COMPLEX WITH A FAB FRAGMENT OF IGG RU5 THAT INHIBITS COLLAGEN BINDING                           | IMMUNE SYSTEM                       |
| 1FEJ | STRUCTURAL IMPLICATIONS OF DRUG RESISTANT MUTANTS OF HIV-1 PROTEASE: HIGH RESOLUTION CRYSTAL STRUCTURES OF THE MUTANT PROTEASE/SUBSTRATE ANALOG COMPLEXES   | HYDROLASE/HYDROLASE INHIBITOR       |
| 1FEV | CRYSTAL STRUCTURE OF THE ALA4AIB MUTATION IN RNASE S                                                                                                        | HYDROLASE                           |
| 1FF0 | STRUCTURAL IMPLICATIONS OF DRUG RESISTANT MUTANTS OF HIV-1 PROTEASE: HIGH RESOLUTION CRYSTAL STRUCTURES OF THE MUTANT PROTEASE/SUBSTRATE ANALOG COMPLEXES.  | HYDROLASE/HYDROLASE INHIBITOR       |
| 1FF1 | STRUCTURAL IMPLICATIONS OF DRUG RESISTANT MUTANTS OF HIV-1 PROTEASE : HIGH RESOLUTION CRYSTAL STRUCTURES OF THE MUTANT PROTEASE/SUBSTRATE ANALOG COMPLEXES. | HYDROLASE/HYDROLASE INHIBITOR       |
| 1FFG | CHEY-BINDING DOMAIN OF CHEA IN COMPLEX WITH CHEY AT 2.1 A RESOLUTION                                                                                        | TRANSFERASE/SIGNALING PROTEIN       |
| 1FFI | STRUCTURAL IMPLICATIONS OF DRUG RESISTANT MUTANTS OF HIV-1 PROTEASE: HIGH RESOLUTION CRYSTAL STRUCTURES OF THE MUTANT PROTEASE/SUBSTRATE ANALOG COMPLEXES   | HYDROLASE/HYDROLASE INHIBITOR       |
| 1FFK | CRYSTAL STRUCTURE OF THE LARGE RIBOSOMAL SUBUNIT FROM HALOARCUA MARISMORTUI AT 2.4 ANGSTROM RESOLUTION                                                      | RIBOSOME                            |
| 1FFN | CRYSTAL STRUCTURE OF MURINE CLASS I H-2DB COMPLEXED WITH PEPTIDE GP33(C9M)                                                                                  | IMMUNE SYSTEM/SIGNALING PROTEIN     |
| 1FFO | CRYSTAL STRUCTURE OF MURINE CLASS I H-2DB COMPLEXED WITH SYNTHETIC PEPTIDE GP33 (C9M/K1A)                                                                   | IMMUNE SYSTEM/SIGNALING PROTEIN     |
| 1FFP | CRYSTAL STRUCTURE OF MURINE CLASS I H-2DB COMPLEXED WITH PEPTIDE GP33 (C9M/K1S)                                                                             | IMMUNE SYSTEM/SIGNALING PROTEIN     |
| 1FFS | CHEY-BINDING DOMAIN OF CHEA IN COMPLEX WITH CHEY FROM CRYSTALS SOAKED IN ACETYL PHOSPHATE                                                                   | TRANSFERASE/SIGNALING PROTEIN       |
| 1FFT | THE STRUCTURE OF UBIQUINOL OXIDASE FROM ESCHERICHIA COLI                                                                                                    | OXIDOREDUCTASE                      |
| 1FFU | CARBON MONOXIDE DEHYDROGENASE FROM HYDROGENOPHAGA PSEUDOFLOVA WHICH LACKS THE MO-PYRANOPTERIN MOIETY OF THE MOLYBDENUM COFACTOR                             | HYDROLASE                           |
| 1FFV | CARBON MONOXIDE DEHYDROGENASE FROM HYDROGENOPHAGA PSEUDOFLOVA                                                                                               | HYDROLASE                           |

|      |                                                                                                                                                           |                               |
|------|-----------------------------------------------------------------------------------------------------------------------------------------------------------|-------------------------------|
| 1FFW | CHEY-BINDING DOMAIN OF CHEA IN COMPLEX WITH CHEY WITH A BOUND IMIDO DIPHOSPHATE                                                                           | TRANSFERASE/SIGNALING PROTEIN |
| 1FFX | TUBULIN:STATHMIN-LIKE DOMAIN COMPLEX                                                                                                                      | STRUCTURAL PROTEIN            |
| 1FFZ | LARGE RIBOSOMAL SUBUNIT COMPLEXED WITH R(CC)-DA-PUROMYCIN                                                                                                 | RIBOSOME                      |
| 1FG2 | CRYSTAL STRUCTURE OF THE LCMV PEPTIDIC EPITOPE GP33 IN COMPLEX WITH THE MURINE CLASS I MHC MOLECULE H-2DB                                                 | IMMUNE SYSTEM                 |
| 1FG6 | STRUCTURAL IMPLICATIONS OF DRUG RESISTANT MUTANTS OF HIV-1 PROTEASE: HIGH RESOLUTION CRYSTAL STRUCTURES OF THE MUTANT PROTEASE/SUBSTRATE ANALOG COMPLEXES | HYDROLASE/HYDROLASE INHIBITOR |
| 1FG9 | 3:1 COMPLEX OF INTERFERON-GAMMA RECEPTOR WITH INTERFERON-GAMMA DIMER                                                                                      | IMMUNE SYSTEM                 |
| 1FGC | STRUCTURAL IMPLICATIONS OF DRUG RESISTANT MUTANTS OF HIV-1 PROTEASE: HIGH RESOLUTION CRYSTAL STRUCTURES OF THE MUTANT PROTEASE/SUBSTRATE ANALOG COMPLEXES | HYDROLASE/HYDROLASE INHIBITOR |
| 1FGN | MONOCLONAL MURINE ANTIBODY 5G9-ANTI-HUMAN TISSUE FACTOR                                                                                                   | IMMUNOGLOBULIN                |
| 1FGO | LIPOXYGENASE-1 (SOYBEAN) AT 100K, Q495A MUTANT                                                                                                            | OXIDOREDUCTASE                |
| 1FH0 | CRYSTAL STRUCTURE OF HUMAN CATHEPSIN V COMPLEXED WITH AN IRREVERSIBLE VINYL SULFONE INHIBITOR                                                             | HYDROLASE                     |
| 1FH5 | CRYSTAL STRUCTURE OF THE FAB FRAGMENT OF THE MONOCLONAL ANTIBODY MAK33                                                                                    | IMMUNE SYSTEM                 |
| 1FHJ | CRYSTAL STRUCTURE OF AQUOMET HEMOGLOBIN-I OF THE MANED WOLF (CHRYSOCYON BRACHYURUS) AT 2.0 RESOLUTION.                                                    | OXYGEN STORAGE/TRANSPORT      |
| 1F18 | RAT GRANZYME B [N66Q] COMPLEXED TO ECOTIN [81-84 IEPD]                                                                                                    | HYDROLASE/HYDROLASE INHIBITOR |
| 1FIG | ROUTES TO CATALYSIS: STRUCTURE OF A CATALYTIC ANTIBODY AND COMPARISON WITH ITS NATURAL COUNTERPART                                                        | IMMUNOGLOBULIN                |
| 1FIN | CYCLIN A-CYCLIN-DEPENDENT KINASE 2 COMPLEX                                                                                                                | COMPLEX (TRANSFERASE/CYCLIN)  |
| 1FIP | THE STRUCTURE OF FIS MUTANT PRO61ALA ILLUSTRATES THAT THE KINK WITHIN THE LONG ALPHA-HELIX IS NOT DUE TO THE PRESENCE OF THE PROLINE RESIDUE              | DNA-BINDING PROTEIN           |
| 1FIQ | CRYSTAL STRUCTURE OF XANTHINE OXIDASE FROM BOVINE MILK                                                                                                    | OXIDOREDUCTASE                |
| 1FIW | THREE-DIMENSIONAL STRUCTURE OF BETA-ACROSIN FROM RAM SPERMATOOZOA                                                                                         | HYDROLASE                     |
| 1FIZ | THREE DIMENSIONAL STRUCTURE OF BETA-ACROSIN FROM BOAR SPERMATOOZOA                                                                                        | HYDROLASE                     |
| 1FJ1 | LYME DISEASE ANTIGEN OSPA IN COMPLEX WITH NEUTRALIZING ANTIBODY FAB LA-2                                                                                  | IMMUNE SYSTEM                 |
| 1FJG | STRUCTURE OF THE THERMUS THERMOPHILUS 30S RIBOSOMAL SUBUNIT IN COMPLEX WITH THE ANTIBIOTICS STREPTOMYCIN, SPECTINOMYCIN, AND PAROMOMYCIN                  | RIBOSOME                      |
| 1FJM | PROTEIN SERINE/THREONINE PHOSPHATASE-1 (ALPHA ISOFORM, TYPE I) COMPLEXED WITH MICROCYSTIN-LR TOXIN                                                        | COMPLEX (HYDROLASE/TOXIN)     |
| 1FJS | CRYSTAL STRUCTURE OF THE INHIBITOR ZK-807834 (CI-1031) COMPLEXED WITH FACTOR XA                                                                           | BLOOD CLOTTING                |

|      |                                                                                                                                                                                                                      |                                        |
|------|----------------------------------------------------------------------------------------------------------------------------------------------------------------------------------------------------------------------|----------------------------------------|
| 1FK9 | CRYSTAL STRUCTURE OF HIV-1 REVERSE TRANSCRIPTASE IN COMPLEX WITH DMP-266(EFAVIRENZ)                                                                                                                                  | TRANSFERASE                            |
| 1FKA | STRUCTURE OF FUNCTIONALLY ACTIVATED SMALL RIBOSOMAL SUBUNIT AT 3.3 Å RESOLUTION                                                                                                                                      | RIBOSOME                               |
| 1FKO | CRYSTAL STRUCTURE OF NNRTI RESISTANT K103N MUTANT HIV-1 REVERSE TRANSCRIPTASE IN COMPLEX WITH DMP-266(EFAVIRENZ)                                                                                                     | TRANSFERASE                            |
| 1FKP | CRYSTAL STRUCTURE OF NNRTI RESISTANT K103N MUTANT HIV-1 REVERSE TRANSCRIPTASE IN COMPLEX WITH NEVIRAPINE                                                                                                             | TRANSFERASE                            |
| 1FL3 | CRYSTAL STRUCTURE OF THE BLUE FLUORESCENT ANTIBODY (19G2) IN COMPLEX WITH STILBENE HAPTEN AT 277K                                                                                                                    | IMMUNE SYSTEM                          |
| 1FL5 | THE UNLIGANDED GERMLINE PRECURSOR TO THE SULFIDE OXIDASE CATALYTIC ANTIBODY 28B4.                                                                                                                                    | IMMUNE SYSTEM                          |
| 1FL6 | THE HAPTEN COMPLEXED GERMLINE PRECURSOR TO SULFIDE OXIDASE CATALYTIC ANTIBODY 28B4                                                                                                                                   | IMMUNE SYSTEM                          |
| 1FL7 | HUMAN FOLLICLE STIMULATING HORMONE                                                                                                                                                                                   | HORMONE/GROWTH FACTOR                  |
| 1FLC | X-RAY STRUCTURE OF THE HAEMAGGLUTININ-ESTERASE-FUSION GLYCOPROTEIN OF INFLUENZA C VIRUS                                                                                                                              | HYDROLASE                              |
| 1FLR | 4-4-20 FAB FRAGMENT                                                                                                                                                                                                  | IMMUNOGLOBULIN                         |
| 1FLT | VEGF IN COMPLEX WITH DOMAIN 2 OF THE FLT-1 RECEPTOR                                                                                                                                                                  | COMPLEX (GROWTH FACTOR/TRANSFERASE)    |
| 1FM0 | MOLYBDOPTERIN SYNTHASE (MOAD/MOAE)                                                                                                                                                                                   | TRANSFERASE                            |
| 1FM2 | THE 2 ÅNGSTRÖM CRYSTAL STRUCTURE OF CEPHALOSPORIN ACYLASE                                                                                                                                                            | HYDROLASE                              |
| 1FM6 | THE 2.1 ÅNGSTRÖM RESOLUTION CRYSTAL STRUCTURE OF THE HETERODIMER OF THE HUMAN RXRALPHA AND PPARGAMMA LIGAND BINDING DOMAINS RESPECTIVELY BOUND WITH 9-CIS RETINOIC ACID AND ROSIGLITAZONE AND CO-ACTIVATOR PEPTIDES. | TRANSCRIPTION                          |
| 1FM9 | THE 2.1 ÅNGSTRÖM RESOLUTION CRYSTAL STRUCTURE OF THE HETERODIMER OF THE HUMAN RXRALPHA AND PPARGAMMA LIGAND BINDING DOMAINS RESPECTIVELY BOUND WITH 9-CIS RETINOIC ACID AND GI262570 AND CO-ACTIVATOR PEPTIDES.      | TRANSCRIPTION                          |
| 1FMA | MOLYBDOPTERIN SYNTHASE (MOAD/MOAE)                                                                                                                                                                                   | TRANSFERASE                            |
| 1FMO | CRYSTAL STRUCTURE OF A POLYHISTIDINE-TAGGED RECOMBINANT CATALYTIC SUBUNIT OF CAMP-DEPENDENT PROTEIN KINASE COMPLEXED WITH THE PEPTIDE INHIBITOR PKI(5-24) AND ADENOSINE                                              | COMPLEX (PHOSPHOTRANSFERASE/INHIBITOR) |
| 1FN3 | CRYSTAL STRUCTURE OF NICKEL RECONSTITUTED HEMOGLOBIN-A CASE FOR PERMANENT, T-STATE HEMOGLOBIN                                                                                                                        | OXYGEN STORAGE/TRANSPORT               |
| 1FN4 | CRYSTAL STRUCTURE OF FAB198, AN EFFICIENT PROTECTOR OF ACETYLCHOLINE RECEPTOR AGAINST MYASTHENOGENIC ANTIBODIES                                                                                                      | IMMUNE SYSTEM                          |
| 1FN8 | FUSARIUM OXYSPOURUM TRYPSIN AT ATOMIC RESOLUTION                                                                                                                                                                     | HYDROLASE                              |
| 1FNE | HISTOCOMPATIBILITY ANTIGEN                                                                                                                                                                                           | IMMUNE SYSTEM                          |
| 1FNG | HISTOCOMPATIBILITY ANTIGEN                                                                                                                                                                                           | IMMUNE SYSTEM                          |
| 1FNP | CRYSTAL STRUCTURE ANALYSIS OF THE MUTANT REACTION CENTER                                                                                                                                                             | PHOTOSYNTHESIS                         |

|      |                                                                                                                                                                                                            |                                          |
|------|------------------------------------------------------------------------------------------------------------------------------------------------------------------------------------------------------------|------------------------------------------|
|      | PRO L209-> PHE FROM THE PHOTOSYNTHETIC PURPLE BACTERIUM RHODOBACTER SPHAEROIDES                                                                                                                            |                                          |
| 1FNQ | CRYSTAL STRUCTURE ANALYSIS OF THE MUTANT REACTION CENTER PRO L209-> GLU FROM THE PHOTOSYNTHETIC PURPLE BACTERIUM RHODOBACTER SPHAEROIDES                                                                   | PHOTOSYNTHESIS                           |
| 1FNS | CRYSTAL STRUCTURE OF THE VON WILLEBRAND FACTOR (VWF) A1 DOMAIN I546V MUTANT IN COMPLEX WITH THE FUNCTION BLOCKING FAB NMC4                                                                                 | IMMUNE SYSTEM                            |
| 1FNT | CRYSTAL STRUCTURE OF THE 20S PROTEASOME FROM YEAST IN COMPLEX WITH THE PROTEASOME ACTIVATOR PA26 FROM TRYPANOSOME BRUCEI AT 3.2 ANGSTROMS RESOLUTION                                                       | HYDROLASE/HYDROLASE ACTIVATOR            |
| 1FO0 | MURINE ALLOREACTIVE SCFV TCR-PEPTIDE-MHC CLASS I MOLECULE COMPLEX                                                                                                                                          | IMMUNE SYSTEM                            |
| 1FOE | CRYSTAL STRUCTURE OF RAC1 IN COMPLEX WITH THE GUANINE NUCLEOTIDE EXCHANGE REGION OF TIAM1                                                                                                                  | SIGNALING PROTEIN, IMMUNE SYSTEM/SIGNALI |
| 1FOR | STRUCTURE DETERMINATION OF AN FAB FRAGMENT THAT NEUTRALIZES HUMAN RHINOVIRUS AND ANALYSIS OF THE FAB-VIRUS COMPLEX                                                                                         | IMMUNOGLOBULIN                           |
| 1FOS | TWO HUMAN C-FOS:C-JUN:DNA COMPLEXES                                                                                                                                                                        | TRANSCRIPTION/DNA                        |
| 1FP4 | CRYSTAL STRUCTURE OF THE ALPHA-H195Q MUTANT OF NITROGENASE                                                                                                                                                 | OXIDOREDUCTASE                           |
| 1FPC | ACTIVE SITE MIMETIC INHIBITION OF THROMBIN                                                                                                                                                                 | COMPLEX (SERINE PROTEASE/INHIBITOR)      |
| 1FPH | THE INTERACTION OF THROMBIN WITH FIBRINOGEN: A STRUCTURAL BASIS FOR ITS SPECIFICITY                                                                                                                        | HYDROLASE(SERINE PROTEINASE)             |
| 1FPP | PROTEIN FARNESYLTRANSFERASE COMPLEX WITH FARNESYL DIPHOSPHATE                                                                                                                                              | PRENYLTRANSFERASE                        |
| 1FPR | CRYSTAL STRUCTURE OF THE COMPLEX FORMED BETWEEN THE CATALYTIC DOMAIN OF SHP-1 AND AN IN VITRO PEPTIDE SUBSTRATE PY469 DERIVED FROM SHPS-1.                                                                 | SIGNALING PROTEIN                        |
| 1FPT | THREE-DIMENSIONAL STRUCTURE OF THE COMPLEX BETWEEN THE FAB FRAGMENT OF AN NEUTRALIZING ANTIBODY FOR TYPE 1 POLIOVIRUS AND ITS VIRAL EPITOPE                                                                | COMPLEX (ANTIBODY/PV-1 FRAGMENT)         |
| 1FQ1 | CRYSTAL STRUCTURE OF KINASE ASSOCIATED PHOSPHATASE (KAP) IN COMPLEX WITH PHOSPHO-CDK2                                                                                                                      | HYDROLASE/TRANSFERASE                    |
| 1FQJ | CRYSTAL STRUCTURE OF THE HETEROTRIMERIC COMPLEX OF THE RGS DOMAIN OF RGS9, THE GAMMA SUBUNIT OF PHOSPHODIESTERASE AND THE GT/I1 CHIMERA ALPHA SUBUNIT [(RGS9)-(PDEGAMMA)-(GT/I1ALPHA)-(GDP)-(ALF4)-(MG2+)] | SIGNALING PROTEIN                        |
| 1FQK | CRYSTAL STRUCTURE OF THE HETERODIMERIC COMPLEX OF THE RGS DOMAIN OF RGS9, AND THE GT/I1 CHIMERA ALPHA SUBUNIT [(RGS9)-(GT/I1ALPHA)-(GDP)-(ALF4)-(MG2+)]                                                    | SIGNALING PROTEIN                        |
| 1FQV | INSIGHTS INTO SCF UBIQUITIN LIGASES FROM THE STRUCTURE OF THE SKP1-SKP2 COMPLEX                                                                                                                            | LIGASE                                   |
| 1FQX | CRYSTAL STRUCTURE OF THE COMPLEX OF HIV-1 PROTEASE WITH A PEPTIDOMIMETIC INHIBITOR                                                                                                                         | HYDROLASE                                |
| 1FR2 | CRYSTAL STRUCTURE OF THE E9 DNASE DOMAIN WITH A MUTANT IMMUNITY PROTEIN IM9(E41A)                                                                                                                          | IMMUNE SYSTEM                            |

|      |                                                                                                                                                                 |                                   |
|------|-----------------------------------------------------------------------------------------------------------------------------------------------------------------|-----------------------------------|
| 1FRF | CRYSTAL STRUCTURE OF THE NI-FE HYDROGENASE FROM DESULFOVIBRIO FRUCTOSOVORANS                                                                                    | OXIDOREDUCTASE                    |
| 1FRG | CRYSTAL STRUCTURE, SEQUENCE, AND EPITOPE MAPPING OF A PEPTIDE COMPLEX OF AN ANTI-INFLUENZA HA PEPTIDE ANTIBODY FAB 26(SLASH)9: FINE-TUNING ANTIBODY SPECIFICITY | VIRAL PROTEIN/IMMUNE SYSTEM       |
| 1FRT | CRYSTAL STRUCTURE OF THE COMPLEX OF RAT NEONATAL FC RECEPTOR WITH FC                                                                                            | COMPLEX (RECEPTOR/IMMUNOGLOBULIN) |
| 1FRV | CRYSTAL STRUCTURE OF THE OXIDIZED FORM OF NI-FE HYDROGENASE                                                                                                     | OXIDOREDUCTASE                    |
| 1FS0 | COMPLEX OF GAMMA/EPSILON ATP SYNTHASE FROM E.COLI                                                                                                               | HYDROLASE                         |
| 1FS1 | INSIGHTS INTO SCF UBIQUITIN LIGASES FROM THE STRUCTURE OF THE SKP1-SKP2 COMPLEX                                                                                 | LIGASE                            |
| 1FS2 | INSIGHTS INTO SCF UBIQUITIN LIGASES FROM THE STRUCTURE OF THE SKP1-SKP2 COMPLEX                                                                                 | LIGASE                            |
| 1FSK | COMPLEX FORMATION BETWEEN A FAB FRAGMENT OF A MONOCLONAL IGG ANTIBODY AND THE MAJOR ALLERGEN FROM BIRCH POLLEN BET V 1                                          | IMMUNE SYSTEM                     |
| 1FSS | ACETYLCHOLINESTERASE (E.C. 3.1.1.7) COMPLEXED WITH FASCICULIN-II                                                                                                | COMPLEX (SERINE ESTERASE/TOXIN)   |
| 1FSX | THE X-RAY STRUCTURE DETERMINATION OF BOVINE CARBONMONOXY HB AT 2.1 Å RESOLUTION AND ITS RELATIONSHIP TO THE QUATERNARY STRUCTURE OF OTHER HB CRYSTAL FORMS      | OXYGEN STORAGE/TRANSPORT          |
| 1FT1 | CRYSTAL STRUCTURE OF PROTEIN FARNESYLTRANSFERASE AT 2.25 ÅNGSTROMS RESOLUTION                                                                                   | TRANSFERASE                       |
| 1FT2 | CO-CRYSTAL STRUCTURE OF PROTEIN FARNESYLTRANSFERASE COMPLEXED WITH A FARNESYL DIPHOSPHATE SUBSTRATE                                                             | TRANSFERASE                       |
| 1FU2 | FIRST PROTEIN STRUCTURE DETERMINED FROM X-RAY POWDER DIFFRACTION DATA                                                                                           | HORMONE/GROWTH FACTOR             |
| 1FU5 | NMR STRUCTURE OF THE N-SH2 DOMAIN OF THE P85 SUBUNIT OF PI3-KINASE COMPLEXED TO A DOUBLY PHOSPHORYLATED PEPTIDE DERIVED FROM POLYOMAVIRUS MIDDLE T ANTIGEN      | PEPTIDE BINDING PROTEIN           |
| 1FUB | FIRST PROTEIN STRUCTURE DETERMINED FROM X-RAY POWDER DIFFRACTION DATA                                                                                           | HORMONE/GROWTH FACTOR             |
| 1FUY | CRYSTAL STRUCTURE OF BETA A169L/BETA C170W DOUBLE MUTANT OF TRYPTOPHAN SYNTHASE COMPLEXED WITH 5-FLUORO-INDOLE-PROPANOL PHOSPHATE                               | LYASE                             |
| 1FV1 | STRUCTURAL BASIS FOR THE BINDING OF AN IMMUNODOMINANT PEPTIDE FROM MYELIN BASIC PROTEIN IN DIFFERENT REGISTERS BY TWO HLA-DR2 ALLELES                           | IMMUNE SYSTEM                     |
| 1FVD | X-RAY STRUCTURES OF THE ANTIGEN-BINDING DOMAINS FROM THREE VARIANTS OF HUMANIZED ANTI-P185-HER2 ANTIBODY 4D5 AND COMPARISON WITH MOLECULAR MODELING             | IMMUNOGLOBULIN                    |
| 1FVE | X-RAY STRUCTURES OF THE ANTIGEN-BINDING DOMAINS FROM THREE VARIANTS OF HUMANIZED ANTI-P185-HER2 ANTIBODY 4D5 AND COMPARISON WITH MOLECULAR MODELING             | IMMUNOGLOBULIN                    |
| 1FVU | CRYSTAL STRUCTURE OF BOTROCETIN                                                                                                                                 | TOXIN                             |

|      |                                                                                                                                         |                              |
|------|-----------------------------------------------------------------------------------------------------------------------------------------|------------------------------|
| 1FVV | THE STRUCTURE OF CDK2/CYCLIN A IN COMPLEX WITH AN OXINDOLE INHIBITOR                                                                    | TRANSFERASE, CELL CYCLE      |
| 1FWA | KLEBSIELLA AEROGENES UREASE, C319A VARIANT AT PH 7.5                                                                                    | HYDROLASE                    |
| 1FWB | KLEBSIELLA AEROGENES UREASE, C319A VARIANT AT PH 6.5                                                                                    | HYDROLASE                    |
| 1FWC | KLEBSIELLA AEROGENES UREASE, C319A VARIANT AT PH 8.5                                                                                    | HYDROLASE                    |
| 1FWD | KLEBSIELLA AEROGENES UREASE, C319A VARIANT AT PH 9.4                                                                                    | HYDROLASE                    |
| 1FWE | KLEBSIELLA AEROGENES UREASE, C319A VARIANT WITH ACETOHYDROXAMIC ACID (AHA) BOUND                                                        | HYDROLASE                    |
| 1FWF | KLEBSIELLA AEROGENES UREASE, C319D VARIANT                                                                                              | HYDROLASE                    |
| 1FWG | KLEBSIELLA AEROGENES UREASE, C319S VARIANT                                                                                              | HYDROLASE                    |
| 1FWH | KLEBSIELLA AEROGENES UREASE, C319Y VARIANT                                                                                              | HYDROLASE                    |
| 1FWI | KLEBSIELLA AEROGENES UREASE, H134A VARIANT                                                                                              | HYDROLASE                    |
| 1FWJ | KLEBSIELLA AEROGENES UREASE, NATIVE                                                                                                     | HYDROLASE                    |
| 1FX0 | CRYSTAL STRUCTURE OF THE CHLOROPLAST F1-ATPASE FROM SPINACH                                                                             | HYDROLASE                    |
| 1FXH | MUTANT OF PENICILLIN ACYLASE IMPAIRED IN CATALYSIS WITH PHENYLACETIC ACID IN THE ACTIVE SITE                                            | HYDROLASE                    |
| 1FXK | CRYSTAL STRUCTURE OF ARCHAEAL PREFOLDIN (GIMC).                                                                                         | CHAPERONE                    |
| 1FXT | STRUCTURE OF A CONJUGATING ENZYME-UBIQUITIN THIOLESTER COMPLEX                                                                          | LIGASE                       |
| 1FXV | PENICILLIN ACYLASE MUTANT IMPAIRED IN CATALYSIS WITH PENICILLIN G IN THE ACTIVE SITE                                                    | HYDROLASE                    |
| 1FXW | CRYSTAL STRUCTURE OF THE RECOMBINANT ALPHA1/ALPHA2 CATALYTIC HETERODIMER OF BOVINE BRAIN PLATELET-ACTIVATING FACTOR ACETYLHYDROLASE IB. | HYDROLASE                    |
| 1FXY | COAGULATION FACTOR XA-TRYPSIN CHIMERA INHIBITED WITH D-PHE-PRO-ARG-CHLOROMETHYLKETONE                                                   | COMPLEX (PROTEASE/INHIBITOR) |
| 1FY4 | FUSARIUM OXYSPORUM TRYPSIN AT ATOMIC RESOLUTION                                                                                         | HYDROLASE                    |
| 1FY5 | FUSARIUM OXYSPORUM TRYPSIN AT ATOMIC RESOLUTION                                                                                         | HYDROLASE                    |
| 1FYH | 1:1 COMPLEX BETWEEN AN INTERFERON GAMMA SINGLE-CHAIN VARIANT AND ITS RECEPTOR                                                           | IMMUNE SYSTEM                |
| 1FYR | DIMER FORMATION THROUGH DOMAIN SWAPPING IN THE CRYSTAL STRUCTURE OF THE GRB2-SH2 AC-PYVNV COMPLEX                                       | HORMONE/GROWTH FACTOR        |
| 1FYT | CRYSTAL STRUCTURE OF A COMPLEX OF A HUMAN ALPHA/BETA-T CELL RECEPTOR, INFLUENZA HA ANTIGEN PEPTIDE, AND MHC CLASS II MOLECULE, HLA-DR1  | IMMUNE SYSTEM                |
| 1FYZ | METHANE MONOOXYGENASE HYDROXYLASE, FORM II REDUCED BY SOAKING                                                                           | OXIDOREDUCTASE               |
| 1FZ0 | METHANE MONOOXYGENASE HYDROXYLASE, FORM II MIXED-VALENT GROWN ANAEROBICALLY                                                             | OXIDOREDUCTASE               |
| 1FZ1 | METHANE MONOOXYGENASE HYDROXYLASE, FORM III OXIDIZED                                                                                    | OXIDOREDUCTASE               |



|      |                                                                                                                                 |                          |
|------|---------------------------------------------------------------------------------------------------------------------------------|--------------------------|
| 1FZ2 | METHANE MONOOXYGENASE HYDROXYLASE, FORM II MIXED-VALENT GENERATED BY CRYSTAL SOAKING                                            | OXIDOREDUCTASE           |
| 1FZ3 | METHANE MONOOXYGENASE HYDROXYLASE, FORM III SOAK AT PH 6.2 (0.1 M PIPES)                                                        | OXIDOREDUCTASE           |
| 1FZ4 | METHANE MONOOXYGENASE HYDROXYLASE, FORM III SOAKED AT PH 8.5 (0.1 M TRIS)                                                       | OXIDOREDUCTASE           |
| 1FZ5 | METHANE MONOOXYGENASE HYDROXYLASE, FORM II CRYSTALLIZED ANAEROBICALLY FROM REDUCED ENZYME                                       | OXIDOREDUCTASE           |
| 1FZ6 | METHANE MONOOXYGENASE HYDROXYLASE, FORM II SOAKED IN 1 M METHANOL                                                               | OXIDOREDUCTASE           |
| 1FZ7 | METHANE MONOOXYGENASE HYDROXYLASE, FORM III SOAKED IN 0.9 M ETHANOL                                                             | OXIDOREDUCTASE           |
| 1FZ8 | METHANE MONOOXYGENASE HYDROXYLASE, FORM II COCRYSTALLIZED WITH DIBROMOMETHANE                                                   | OXIDOREDUCTASE           |
| 1FZ9 | METHANE MONOOXYGENASE HYDROXYLASE, FORM II COCRYSTALLIZED WITH IODOETHANE                                                       | OXIDOREDUCTASE           |
| 1FZA | CRYSTAL STRUCTURE OF FIBRINOGEN FRAGMENT D                                                                                      | BLOOD COAGULATION        |
| 1FZB | CRYSTAL STRUCTURE OF CROSSLINKED FRAGMENT D                                                                                     | BLOOD COAGULATION        |
| 1FZC | CRYSTAL STRUCTURE OF FRAGMENT DOUBLE-D FROM HUMAN FIBRIN WITH TWO DIFFERENT BOUND LIGANDS                                       | BLOOD COAGULATION        |
| 1FZE | CRYSTAL STRUCTURE OF FRAGMENT DOUBLE-D FROM HUMAN FIBRIN                                                                        | BLOOD COAGULATION        |
| 1FZF | CRYSTAL STRUCTURE OF FRAGMENT DOUBLE-D FROM HUMAN FIBRIN WITH THE PEPTIDE LIGAND GLY-HIS-ARG-PRO-AMIDE                          | BLOOD COAGULATION        |
| 1FZG | CRYSTAL STRUCTURE OF FRAGMENT D FROM HUMAN FIBRINOGEN WITH THE PEPTIDE LIGAND GLY-HIS-ARG-PRO-AMIDE                             | BLOOD COAGULATION        |
| 1FZH | METHANE MONOOXYGENASE HYDROXYLASE, FORM II PRESSURIZED WITH XENON GAS                                                           | OXIDOREDUCTASE           |
| 1FZI | METHANE MONOOXYGENASE HYDROXYLASE, FORM I PRESSURIZED WITH XENON GAS                                                            | OXIDOREDUCTASE           |
| 1FZJ | MHC CLASS I NATURAL MUTANT H-2KBM1 HEAVY CHAIN COMPLEXED WITH BETA-2 MICROGLOBULIN AND VESICULAR STOMATITIS VIRUS NUCLEOPROTEIN | IMMUNE SYSTEM            |
| 1FZK | MHC CLASS I NATURAL MUTANT H-2KBM1 HEAVY CHAIN COMPLEXED WITH BETA-2 MICROGLOBULIN AND SENDAI VIRUS NUCLEOPROTEIN               | IMMUNE SYSTEM            |
| 1FZM | MHC CLASS I NATURAL MUTANT H-2KBM8 HEAVY CHAIN COMPLEXED WITH BETA-2 MICROGLOBULIN AND VESICULAR STOMATITIS VIRUS NUCLEOPROTEIN | IMMUNE SYSTEM            |
| 1FZO | MHC CLASS I NATURAL MUTANT H-2KBM8 HEAVY CHAIN COMPLEXED WITH BETA-2 MICROGLOBULIN AND SENDAI VIRUS NUCLEOPROTEIN               | IMMUNE SYSTEM            |
| 1G08 | CARBONMONOXY LIGANDED BOVINE HEMOGLOBIN PH 5.0                                                                                  | OXYGEN STORAGE/TRANSPORT |
| 1G09 | CARBONMONOXY LIGANDED BOVINE HEMOGLOBIN PH 7.2                                                                                  | OXYGEN STORAGE/TRANSPORT |
| 1G0A | CARBONMONOXY LIGANDED BOVINE HEMOGLOBIN PH 8.5                                                                                  | OXYGEN STORAGE/TRANSPORT |

|      |                                                                                                                                                             |                                 |
|------|-------------------------------------------------------------------------------------------------------------------------------------------------------------|---------------------------------|
| 1G0B | CARBONMONOXY LIGANDED EQUINE HEMOGLOBIN PH 8.5                                                                                                              | OXYGEN STORAGE/TRANSPORT        |
| 1G0U | A GATED CHANNEL INTO THE PROTEASOME CORE PARTICLE                                                                                                           | HYDROLASE                       |
| 1G0V | THE STRUCTURE OF PROTEINASE A COMPLEXED WITH A IA3 MUTANT, MVV                                                                                              | HYDROLASE/HYDROLASE INHIBITOR   |
| 1G1F | CRYSTAL STRUCTURE OF PROTEIN TYROSINE PHOSPHATASE 1B COMPLEXED WITH A TRI-PHOSPHORYLATED PEPTIDE (RDI(PTR)ETD(PTR)(PTR)RK) FROM THE INSULIN RECEPTOR KINASE | HYDROLASE, SIGNALING PROTEIN    |
| 1G1G | CRYSTAL STRUCTURE OF PROTEIN TYROSINE PHOSPHATASE 1B COMPLEXED WITH A MONO-PHOSPHORYLATED PEPTIDE (ETDY(PTR)RKGKGLL) FROM THE INSULIN RECEPTOR KINASE       | HYDROLASE, SIGNALING PROTEIN    |
| 1G1H | CRYSTAL STRUCTURE OF PROTEIN TYROSINE PHOSPHATASE 1B COMPLEXED WITH A BIS-PHOSPHORYLATED PEPTIDE (ETD(PTR)(PTR)RKGKGLL) FROM THE INSULIN RECEPTOR KINASE    | HYDROLASE, SIGNALING PROTEIN    |
| 1G1S | P-SELECTIN LECTIN/EGF DOMAINS COMPLEXED WITH PSGL-1 PEPTIDE                                                                                                 | IMMUNE SYSTEM, MEMBRANE PROTEIN |
| 1G1X | STRUCTURE OF RIBOSOMAL PROTEINS S15, S6, S18, AND 16S RIBOSOMAL RNA                                                                                         | RIBOSOME                        |
| 1G20 | MGATP-BOUND AND NUCLEOTIDE-FREE STRUCTURES OF A NITROGENASE PROTEIN COMPLEX BETWEEN LEU127DEL-FE PROTEIN AND THE MOFE PROTEIN                               | OXIDOREDUCTASE                  |
| 1G21 | MGATP-BOUND AND NUCLEOTIDE-FREE STRUCTURES OF A NITROGENASE PROTEIN COMPLEX BETWEEN LEU127DEL-FE PROTEIN AND THE MOFE PROTEIN                               | OXIDOREDUCTASE                  |
| 1G2C | HUMAN RESPIRATORY SYNCYTIAL VIRUS FUSION PROTEIN CORE                                                                                                       | VIRAL PROTEIN                   |
| 1G30 | THROMBIN INHIBITOR COMPLEX                                                                                                                                  | HYDROLASE                       |
| 1G32 | THROMBIN INHIBITOR COMPLEX                                                                                                                                  | HYDROLASE                       |
| 1G3F | NMR STRUCTURE OF A 9 RESIDUE PEPTIDE FROM SMAC/DIABLO COMPLEXED TO THE BIR3 DOMAIN OF XIAP                                                                  | APOPTOSIS                       |
| 1G3I | CRYSTAL STRUCTURE OF THE HSLUV PROTEASE-CHAPERONE COMPLEX                                                                                                   | CHAPERONE/HYDROLASE             |
| 1G3J | CRYSTAL STRUCTURE OF THE XTCF3-CBD/BETA-CATENIN ARMADILLO REPEAT COMPLEX                                                                                    | TRANSCRIPTION                   |
| 1G3N | STRUCTURE OF A P18(INK4C)-CDK6-K-CYCLIN TERNARY COMPLEX                                                                                                     | CELL CYCLE, SIGNALING PROTEIN   |
| 1G4A | CRYSTAL STRUCTURES OF THE HSLVU PEPTIDASE-ATPASE COMPLEX REVEAL AN ATP-DEPENDENT PROTEOLYSIS MECHANISM                                                      | CHAPERONE/HYDROLASE             |
| 1G4B | CRYSTAL STRUCTURES OF THE HSLVU PEPTIDASE-ATPASE COMPLEX REVEAL AN ATP-DEPENDENT PROTEOLYSIS MECHANISM                                                      | CHAPERONE/HYDROLASE             |
| 1G4U | CRYSTAL STRUCTURE OF THE SALMONELLA TYROSINE PHOSPHATASE AND GTPASE ACTIVATING PROTEIN SPTP BOUND TO RAC1                                                   | SIGNALING PROTEIN               |
| 1G4Y | 1.60 Å CRYSTAL STRUCTURE OF THE GATING DOMAIN FROM SMALL CONDUCTANCE POTASSIUM CHANNEL COMPLEXED WITH CALCIUM-CALMODULIN                                    | SIGNALING PROTEIN               |
| 1G5J | COMPLEX OF BCL-XL WITH PEPTIDE FROM BAD                                                                                                                     | APOPTOSIS                       |
| 1G5Q | EPID H67N COMPLEXED WITH SUBSTRATE PEPTIDE DSYTC                                                                                                            | OXIDOREDUCTASE                  |

|      |                                                                                                                                          |                                   |
|------|------------------------------------------------------------------------------------------------------------------------------------------|-----------------------------------|
| 1G65 | CRYSTAL STRUCTURE OF EPOXOMICIN:20S PROTEASOME REVEALS A MOLECULAR BASIS FOR SELECTIVITY OF ALPHA,BETA-EPOXYKETONE PROTEASOME INHIBITORS | HYDROLASE                         |
| 1G6R | A FUNCTIONAL HOT SPOT FOR ANTIGEN RECOGNITION IN A SUPERAGONIST TCR/MHC COMPLEX                                                          | IMMUNE SYSTEM                     |
| 1G6V | COMPLEX OF THE CAMELID HEAVY-CHAIN ANTIBODY FRAGMENT CAB-CA05 WITH BOVINE CARBONIC ANHYDRASE                                             | LYASE/IMMUNE SYSTEM               |
| 1G72 | CATALYTIC MECHANISM OF QUINOPROTEIN METHANOL DEHYDROGENASE: A THEORETICAL AND X-RAY CRYSTALLOGRAPHIC INVESTIGATION                       | OXIDOREDUCTASE                    |
| 1G73 | CRYSTAL STRUCTURE OF SMAC BOUND TO XIAP-BIR3 DOMAIN                                                                                      | APOPTOSIS/APOPTOSIS INHIBITOR     |
| 1G7A | 1.2 A STRUCTURE OF T3R3 HUMAN INSULIN AT 100 K                                                                                           | HORMONE/GROWTH FACTOR             |
| 1G7B | 1.3 A STRUCTURE OF T3R3 HUMAN INSULIN AT 100 K                                                                                           | HORMONE/GROWTH FACTOR             |
| 1G7C | YEAST EEF1A:EEF1BA IN COMPLEX WITH GDPNP                                                                                                 | TRANSLATION                       |
| 1G7H | CRYSTAL STRUCTURE OF HEN EGG WHITE LYSOZYME (HEL) COMPLEXED WITH THE MUTANT ANTI-HEL MONOCLONAL ANTIBODY D1.3(VLW92A)                    | HYDROLASE INHIBITOR/HYDROLASE     |
| 1G7I | CRYSTAL STRUCTURE OF HEN EGG WHITE LYSOZYME (HEL) COMPLEXED WITH THE MUTANT ANTI-HEL MONOCLONAL ANTIBODY D1.3 (VLW92F)                   | HYDROLASE INHIBITOR/HYDROLASE     |
| 1G7J | CRYSTAL STRUCTURE OF HEN EGG WHITE LYSOZYME (HEL) COMPLEXED WITH THE MUTANT ANTI-HEL MONOCLONAL ANTIBODY D1.3 (VLW92H)                   | HYDROLASE INHIBITOR/HYDROLASE     |
| 1G7L | CRYSTAL STRUCTURE OF HEN EGG WHITE LYSOZYME (HEL) COMPLEXED WITH THE MUTANT ANTI-HEL MONOCLONAL ANTIBODY D1.3 (VLW92S)                   | HYDROLASE INHIBITOR/HYDROLASE     |
| 1G7M | CRYSTAL STRUCTURE OF HEN EGG WHITE LYSOZYME (HEL) COMPLEXED WITH THE MUTANT ANTI-HEL MONOCLONAL ANTIBODY D1.3 (VLW92V)                   | HYDROLASE INHIBITOR/HYDROLASE     |
| 1G7P | CRYSTAL STRUCTURE OF MHC CLASS I H-2KB HEAVY CHAIN COMPLEXED WITH BETA-2 MICROGLOBULIN AND YEAST ALPHA-GLUCOSIDASE                       | IMMUNE SYSTEM                     |
| 1G7Q | CRYSTAL STRUCTURE OF MHC CLASS I H-2KB HEAVY CHAIN COMPLEXED WITH BETA-2 MICROGLOBULIN AND MUC1 VNTR PEPTIDE SAPDTRPA                    | IMMUNE SYSTEM                     |
| 1G8K | CRYSTAL STRUCTURE ANALYSIS OF ARSENITE OXIDASE FROM ALCALIGENES FAECALIS                                                                 | OXIDOREDUCTASE                    |
| 1G9M | HIV-1 HXBC2 GP120 ENVELOPE GLYCOPROTEIN COMPLEXED WITH CD4 AND INDUCED NEUTRALIZING ANTIBODY 17B                                         | VIRAL PROTEIN/IMMUNE SYSTEM       |
| 1G9N | HIV-1 YU2 GP120 ENVELOPE GLYCOPROTEIN COMPLEXED WITH CD4 AND INDUCED NEUTRALIZING ANTIBODY 17B                                           | VIRAL PROTEIN/IMMUNE SYSTEM       |
| 1G9V | HIGH RESOLUTION CRYSTAL STRUCTURE OF DEOXY HEMOGLOBIN COMPLEXED WITH A POTENT ALLOSTERIC EFFECTOR                                        | OXYGEN STORAGE/TRANSPORT          |
| 1GAF | 48G7 HYBRIDOMA LINE FAB COMPLEXED WITH HAPTEN 5-(PARA-NITROPHENYL PHOSPHONATE)-PENTANOIC ACID                                            | CATALYTIC ANTIBODY                |
| 1GAG | CRYSTAL STRUCTURE OF THE INSULIN RECEPTOR KINASE IN COMPLEX WITH A BISUBSTRATE INHIBITOR                                                 | TRANSFERASE, SIGNALING PROTEIN    |
| 1GAQ | CRYSTAL STRUCTURE OF THE COMPLEX BETWEEN FERREDOXIN AND FERREDOXIN-NADP+ REDUCTASE                                                       | OXIDOREDUCTASE/ELECTRON TRANSPORT |

|      |                                                                                                                        |                                      |
|------|------------------------------------------------------------------------------------------------------------------------|--------------------------------------|
| 1GBU | DEOXY (BETA-(C93A,C112G)) HUMAN HEMOGLOBIN                                                                             | OXYGEN TRANSPORT                     |
| 1GBV | (ALPHA-OXY, BETA-(C112G)DEOXY) T-STATE HUMAN HEMOGLOBIN                                                                | OXYGEN TRANSPORT                     |
| 1GC1 | HIV-1 GP120 CORE COMPLEXED WITH CD4 AND A NEUTRALIZING HUMAN ANTIBODY                                                  | VIRAL PROTEIN/RECEPTOR/IMMUNE SYSTEM |
| 1GCV | DEOXY FORM HEMOGLOBIN FROM MUSTELUS GRISEUS                                                                            | OXYGEN STORAGE/TRANSPORT             |
| 1GCW | CO FORM HEMOGLOBIN FROM MUSTELUS GRISEUS                                                                               | OXYGEN STORAGE/TRANSPORT             |
| 1GDN | FUSARIUM OXYSPORUM TRYPSIN AT ATOMIC RESOLUTION                                                                        | HYDROLASE                            |
| 1GDQ | FUSARIUM OXYSPORUM TRYPSIN AT ATOMIC RESOLUTION                                                                        | HYDROLASE                            |
| 1GDU | FUSARIUM OXYSPORUM TRYPSIN AT ATOMIC RESOLUTION                                                                        | HYDROLASE                            |
| 1GEC | LYCYL ENDOPEPTIDASE-COMPLEX WITH BENZYLOXYCARBONYL-LEUCINE-VALINE-GLYCINE-METHYLENE COVALENTLY BOUND TO CYSTEINE 25    | COMPLEX (PROTEINASE/INHIBITOR)       |
| 1GFW | THE 2.8 ANGSTROM CRYSTAL STRUCTURE OF CASPASE-3 (APOPAIN OR CPP32)IN COMPLEX WITH AN ISATIN SULFONAMIDE INHIBITOR.     | HYDROLASE                            |
| 1GG2 | G PROTEIN HETEROTRIMER MUTANT GI_ALPHA_1(G203A) BETA_1 GAMMA_2 WITH GDP BOUND                                          | COMPLEX (GTP-BINDING/TRANSDUCER)     |
| 1GG6 | CRYSTAL STRUCTURE OF GAMMA CHYMOTRYPSIN WITH N-ACETYL-PHENYLALANINE TRIFLUOROMETHYL KETONE BOUND AT THE ACTIVE SITE    | HYDROLASE/HYDROLASE INHIBITOR        |
| 1GGB | MAJOR ANTIGEN-INDUCED DOMAIN REARRANGEMENTS IN AN ANTIBODY                                                             | IMMUNOGLOBULIN                       |
| 1GGC | MAJOR ANTIGEN-INDUCED DOMAIN REARRANGEMENTS IN AN ANTIBODY                                                             | IMMUNOGLOBULIN                       |
| 1GGD | CRYSTAL STRUCTURE OF GAMMA CHYMOTRYPSIN WITH N-ACETYL-LEUCIL-PHENYLALANINE ALDEHYDE BOUND AT THE ACTIVE SITE           | HYDROLASE/HYDROLASE INHIBITOR        |
| 1GGI | CRYSTAL STRUCTURE OF AN HIV-1 NEUTRALIZING ANTIBODY 50.1 IN COMPLEX WITH ITS V3 LOOP PEPTIDE ANTIGEN                   | IMMUNOGLOBULIN                       |
| 1GGP | CRYSTAL STRUCTURE OF TRICHOSANTHES KIRILOWII LECTIN-1 AND ITS RELATION TO THE TYPE 2 RIBOSOME INACTIVATING PROTEINS    | SUGAR BINDING PROTEIN                |
| 1GH0 | CRYSTAL STRUCTURE OF C-PHYCOCYANIN FROM SPIRULINA PLATENSIS                                                            | PHOTOSYNTHESIS                       |
| 1GH6 | RETINOBLASTOMA POCKET COMPLEXED WITH SV40 LARGE T ANTIGEN                                                              | ANTITUMOR PROTEIN                    |
| 1GHA | A SECOND ACTIVE SITE IN CHYMOTRYPSIN? THE X-RAY CRYSTAL STRUCTURE OF N-ACETYL-D-TRYPTOPHAN BOUND TO GAMMA-CHYMOTRYPSIN | HYDROLASE(SERINE PROTEINASE)         |
| 1GHD | CRYSTAL STRUCTURE OF THE GLUTARYL-7-AMINOCEPHALOSPORANIC ACID ACYLASE BY MAD PHASING                                   | HYDROLASE                            |
| 1GHF | ANTI-ANTI-IDIOTYPE GH1002 FAB FRAGMENT                                                                                 | ANTIBODY FAB FRAGMENT                |
| 1GHQ | CR2-C3D COMPLEX STRUCTURE                                                                                              | IMMUNE SYSTEM/VIRAL PROTEIN RECEPTOR |
| 1GHV | A NOVEL SERINE PROTEASE INHIBITION MOTIF INVOLVING A MULTI-CENTERED SHORT HYDROGEN BONDING NETWORK AT THE ACTIVE SITE  | BLOOD CLOTTING                       |
| 1GHW | A NOVEL SERINE PROTEASE INHIBITION MOTIF INVOLVING A MULTI-CENTERED SHORT HYDROGEN BONDING NETWORK AT THE ACTIVE SITE  | BLOOD CLOTTING                       |

|      |                                                                                                                                                              |                              |
|------|--------------------------------------------------------------------------------------------------------------------------------------------------------------|------------------------------|
| 1GHX | A NOVEL SERINE PROTEASE INHIBITION MOTIF INVOLVING A MULTI-CENTERED SHORT HYDROGEN BONDING NETWORK AT THE ACTIVE SITE                                        | BLOOD CLOTting               |
| 1GHY | A NOVEL SERINE PROTEASE INHIBITION MOTIF INVOLVING A MULTI-CENTERED SHORT HYDROGEN BONDING NETWORK AT THE ACTIVE SITE                                        | BLOOD CLOTting               |
| 1GIG | REFINED THREE-DIMENSIONAL STRUCTURE OF THE FAB FRAGMENT OF A MURINE IGG1, LAMBDA ANTIBODY                                                                    | IMMUNOGLOBULIN               |
| 1GJ4 | SELECTIVITY AT S1, H2O DISPLACEMENT, UPA, TPA, SER190/ALA190 PROTEASE, STRUCTURE-BASED DRUG DESIGN                                                           | BLOOD CLOTting, HYDROLASE    |
| 1GJ5 | SELECTIVITY AT S1, H2O DISPLACEMENT, UPA, TPA, SER190/ALA190 PROTEASE, STRUCTURE-BASED DRUG DESIGN                                                           | BLOOD CLOTting, HYDROLASE    |
| 1GJA | ENGINEERING INHIBITORS HIGHLY SELECTIVE FOR THE S1 SITES OF SER190 TRYPSIN-LIKE SERINE PROTEASE DRUG TARGETS                                                 | BLOOD CLOTting, HYDROLASE    |
| 1GK0 | STRUCTURE-BASED PREDICTION OF MODIFICATIONS IN GLUTARYLAMIDASE TO ALLOW SINGLE-STEP ENZYMATIC PRODUCTION OF 7-AMINOCEPHALOSPORANIC ACID FROM CEPHALOSPORIN C | HYDROLASE                    |
| 1GK1 | STRUCTURE-BASED PREDICTION OF MODIFICATIONS IN GLUTARYLAMIDASE TO ALLOW SINGLE-STEP ENZYMATIC PRODUCTION OF 7-AMINOCEPHALOSPORANIC ACID FROM CEPHALOSPORIN C | HYDROLASE                    |
| 1GK8 | RUBISCO FROM CHLAMYDOMONAS REINHARDTII                                                                                                                       | LYASE                        |
| 1GK9 | CRYSTAL STRUCTURES OF PENICILLIN ACYLASE ENZYME-SUBSTRATE COMPLEXES: STRUCTURAL INSIGHTS INTO THE CATALYTIC MECHANISM                                        | ANTIBIOTIC RESISTANCE        |
| 1GKF | CRYSTAL STRUCTURES OF PENICILLIN ACYLASE ENZYME-SUBSTRATE COMPLEXES: STRUCTURAL INSIGHTS INTO THE CATALYTIC MECHANISM                                        | ANTIBIOTIC RESISTANCE        |
| 1GKT | NEUTRON LAUE DIFFRACTION STRUCTURE OF ENDOTHIAPEPSIN COMPLEXED WITH TRANSITION STATE ANALOGUE INHIBITOR H261                                                 | COMPLEX (PROTEASE/INHIBITOR) |
| 1GL0 | STRUCTURE OF THE COMPLEX BETWEEN BOVINE ALPHA-CHYMOTRYPSIN AND PMP-D2V, AN INHIBITOR FROM THE INSECT LOCUSTA MIGRATORIA                                      | COMPLEX (PROTEASE/INHIBITOR) |
| 1GL1 | STRUCTURE OF THE COMPLEX BETWEEN BOVINE ALPHA-CHYMOTRYPSIN AND PMP-C, AN INHIBITOR FROM THE INSECT LOCUSTA MIGRATORIA                                        | COMPLEX (PROTEASE/INHIBITOR) |
| 1GLA | STRUCTURE OF THE REGULATORY COMPLEX OF ESCHERICHIA COLI IIIIGLC WITH GLYCEROL KINASE                                                                         | PHOSPHOTRANSFERASE           |
| 1GLB | STRUCTURE OF THE REGULATORY COMPLEX OF ESCHERICHIA COLI IIIIGLC WITH GLYCEROL KINASE                                                                         | PHOSPHOTRANSFERASE           |
| 1GLC | CATION PROMOTED ASSOCIATION (CPA) OF A REGULATORY AND TARGET PROTEIN IS CONTROLLED BY PHOSPHORYLATION                                                        | PHOSPHOTRANSFERASE           |
| 1GLD | CATION PROMOTED ASSOCIATION (CPA) OF A REGULATORY AND TARGET PROTEIN IS CONTROLLED BY PHOSPHORYLATION                                                        | PHOSPHOTRANSFERASE           |
| 1GLE | CATION PROMOTED ASSOCIATION (CPA) OF A REGULATORY AND TARGET PROTEIN IS CONTROLLED BY PHOSPHORYLATION                                                        | PHOSPHOTRANSFERASE           |
| 1GLI | DEOXYHEMOGLOBIN T38W (ALPHA CHAINS), V1G (ALPHA AND BETA CHAINS)                                                                                             | OXYGEN TRANSPORT             |
| 1GM7 | CRYSTAL STRUCTURES OF PENICILLIN ACYLASE ENZYME-SUBSTRATE COMPLEXES: STRUCTURAL INSIGHTS INTO THE CATALYTIC MECHANISM                                        | HYDROLASE                    |

|      |                                                                                                                                                      |                                     |
|------|------------------------------------------------------------------------------------------------------------------------------------------------------|-------------------------------------|
| 1GM8 | CRYSTAL STRUCTURES OF PENICILLIN ACYLASE ENZYME-SUBSTRATE COMPLEXES: STRUCTURAL INSIGHTS INTO THE CATALYTIC MECHANISM                                | HYDROLASE                           |
| 1GM9 | CRYSTAL STRUCTURES OF PENICILLIN ACYLASE ENZYME-SUBSTRATE COMPLEXES: STRUCTURAL INSIGHTS INTO THE CATALYTIC MECHANISM                                | HYDROLASE                           |
| 1GMC | THE X-RAY CRYSTAL STRUCTURE OF THE TETRAHEDRAL INTERMEDIATE OF GAMMA-CHYMOTRYPSIN IN HEXANE                                                          | HYDROLASE(SERINE PROTEASE)          |
| 1GMD | X-RAY CRYSTAL STRUCTURE OF GAMMA-CHYMOTRYPSIN IN HEXANE                                                                                              | HYDROLASE(SERINE PROTEASE)          |
| 1GMH | REFINED CRYSTAL STRUCTURE OF "AGED" AND "NON-AGED" ORGANOPHOSPHORYL CONJUGATES OF GAMMA-CHYMOTRYPSIN                                                 | HYDROLASE(SERINE PROTEINASE)        |
| 1GO3 | STRUCTURE OF AN ARCHEAL HOMOLOG OF THE EUKARYOTIC RNA POLYMERASE II RPB4/RPB7 COMPLEX                                                                | TRANSFERASE                         |
| 1GO4 | CRYSTAL STRUCTURE OF MAD1-MAD2 REVEALS A CONSERVED MAD2 BINDING MOTIF IN MAD1 AND CDC20.                                                             | CELL CYCLE                          |
| 1GOT | HETEROTRIMERIC COMPLEX OF A GT-ALPHA/GI-ALPHA CHIMERA AND THE GT-BETA-GAMMA SUBUNITS                                                                 | COMPLEX (GTP-BINDING/TRANSDUCER)    |
| 1GP2 | G PROTEIN HETEROTRIMER GI_ALPHA_1 BETA_1 GAMMA_2 WITH GDP BOUND                                                                                      | COMPLEX (GTP-BINDING/TRANSDUCER)    |
| 1GPQ | STRUCTURE OF IVY COMPLEXED WITH ITS TARGET, HEWL                                                                                                     | LYSOZYME/INHIBITOR COMPLEX          |
| 1GPW | STRUCTURAL EVIDENCE FOR AMMONIA TUNNELING ACROSS THE (BETA/ALPHA)8 BARREL OF THE IMIDAZOLE GLYCEROL PHOSPHATE SYNTHASE BIENZYME COMPLEX.             | COMPLEX (LYASE/TRANSFERASE)         |
| 1GRN | CRYSTAL STRUCTURE OF THE CDC42/CDC42GAP/ALF3 COMPLEX.                                                                                                | GENE REGULATION                     |
| 1GRU | SOLUTION STRUCTURE OF GROES-ADP7-GROEL-ATP7 COMPLEX BY CRYO-EM                                                                                       | CHAPERONIN                          |
| 1GSS | THREE-DIMENSIONAL STRUCTURE OF CLASS PI GLUTATHIONE S-TRANSFERASE FROM HUMAN PLACENTA IN COMPLEX WITH S-HEXYLGLUTATHIONE AT 2.8 ANGSTROMS RESOLUTION | TRANSFERASE(GLUTATHIONE)            |
| 1GUA | HUMAN RAPIA, RESIDUES 1-167, DOUBLE MUTANT (E30D,K31E) COMPLEXED WITH GPPNHP AND THE RAS-BINDING-DOMAIN OF HUMAN C-RAF1, RESIDUES 51-131             | COMPLEX (GTP-BINDING/ATP-BINDING)   |
| 1GUJ | INSULIN AT PH 2: STRUCTURAL ANALYSIS OF THE CONDITIONS PROMOTING INSULIN FIBRE FORMATION.                                                            | HORMONE                             |
| 1GUL | HUMAN GLUTATHIONE TRANSFERASE A4-4 COMPLEX WITH IODOBENZYL GLUTATHIONE                                                                               | TRANSFERASE                         |
| 1GUX | RB POCKET BOUND TO E7 LXCXE MOTIF                                                                                                                    | COMPLEX (TRANSCRIPTION REG/PEPTIDE) |
| 1GVE | AFLATOXIN ALDEHYDE REDUCTASE (AKR7A1) FROM RAT LIVER                                                                                                 | OXIDOREDUCTASE                      |
| 1GVT | ENDOTHIAPEPSIN COMPLEX WITH CP-80,794                                                                                                                | HYDROLASE                           |
| 1GVU | ENDOTHIAPEPSIN COMPLEX WITH H189                                                                                                                     | HYDROLASE                           |
| 1GVW | ENDOTHIAPEPSIN COMPLEX WITH PD-130,328                                                                                                               | HYDROLASE                           |
| 1GWQ | HUMAN OESTROGEN RECEPTOR ALPHA LIGAND-BINDING DOMAIN IN COMPLEX WITH RALOXIFENE CORE AND TIF2 NRBOX2 PEPTIDE                                         | NUCLEAR RECEPTOR                    |
| 1GWR | HUMAN OESTROGEN RECEPTOR ALPHA LIGAND-BINDING DOMAIN IN                                                                                              | NUCLEAR RECEPTOR                    |

|      |                                                                                                                                  |                                      |
|------|----------------------------------------------------------------------------------------------------------------------------------|--------------------------------------|
|      | COMPLEX WITH 17BETA-OESTRADIOL AND TIF2 NRBOX3 PEPTIDE                                                                           |                                      |
| 1GX7 | BEST MODEL OF THE ELECTRON TRANSFER COMPLEX BETWEEN CYTOCHROME C3 AND [FE]-HYDROGENASE                                           | OXIDOREDUCTASE                       |
| 1GXD | PROMMP-2/TIMP-2 COMPLEX                                                                                                          | HYDROLASE                            |
| 1GXS | CRYSTAL STRUCTURE OF HYDROXYNITRILE LYASE FROM SORGHUM BICOLOR IN COMPLEX WITH INHIBITOR BENZOIC ACID: A NOVEL CYANOGENIC ENZYME | LYASE                                |
| 1GY3 | PCDK2/CYCLIN A IN COMPLEX WITH MGADP, NITRATE AND PEPTIDE SUBSTRATE                                                              | CELL CYCLE REGULATORY PROTEIN KINASE |
| 1GYB | N77Y POINT MUTANT OF YNTF2 BOUND TO FXFG NUCLEOPORIN REPEAT                                                                      | NUCLEAR TRANSPORT                    |
| 1GZL | CRYSTAL STRUCTURE OF C14LINKMID/IQN17: A CROSS-LINKED INHIBITOR OF HIV-1 ENTRY BOUND TO THE GP41 HYDROPHOBIC POCKET              | GLYCOPROTEIN                         |
| 1GZS | CRYSTAL STRUCTURE OF THE COMPLEX BETWEEN THE GEF DOMAIN OF THE SALMONELLA TYPHIMURIUM SOPE TOXIN AND HUMAN CDC42                 | COMPLEX (TOXIN/CELL CYCLE PROTEIN)   |
| 1GZX | OXY T STATE HAEMOGLOBIN: OXYGEN BOUND AT ALL FOUR HAEMS                                                                          | OXYGEN TRANSPORT                     |
| 1H0D | CRYSTAL STRUCTURE OF HUMAN ANGIOGENIN IN COMPLEX WITH FAB FRAGMENT OF ITS MONOCLONAL ANTIBODY MAB 26-2F                          | COMPLEX (ANTIBODY/HYDROLASE)         |
| 1H0G | COMPLEX OF A CHITINASE WITH THE NATURAL PRODUCT CYCLOPENTAPEPTIDE ARGADIN FROM CLONOSTACHYS                                      | HYDROLASE                            |
| 1H0H | TUNGSTEN CONTAINING FORMATE DEHYDROGENASE FROM DESULFOVIBRIO GIGAS                                                               | DEHYDROGENASE                        |
| 1H0I | COMPLEX OF A CHITINASE WITH THE NATURAL PRODUCT CYCLOPENTAPEPTIDE ARGIFIN FROM GLIOCLADIU                                        | HYDROLASE                            |
| 1H15 | X-RAY CRYSTAL STRUCTURE OF HLA-DRA1*0101/DRB5*0101 COMPLEXED WITH A PEPTIDE FROM EPSTEIN BARR VIRUS DNA POLYMERASE               | COMPLEX (MHC/ANTIGEN)                |
| 1H1L | NITROGENASE MO-FE PROTEIN FROM KLEBSIELLA PNEUMONIAE, NIFV MUTANT                                                                | OXIDOREDUCTASE                       |
| 1H1P | STRUCTURE OF HUMAN THR160-PHOSPHO CDK2/CYCLIN A COMPLEXED WITH THE INHIBITOR NU2058                                              | TRANSFERASE                          |
| 1H1Q | STRUCTURE OF HUMAN THR160-PHOSPHO CDK2/CYCLIN A COMPLEXED WITH THE INHIBITOR NU6094                                              | TRANSFERASE                          |
| 1H1R | STRUCTURE OF HUMAN THR160-PHOSPHO CDK2/CYCLIN A COMPLEXED WITH THE INHIBITOR NU6086                                              | TRANSFERASE                          |
| 1H1S | STRUCTURE OF HUMAN THR160-PHOSPHO CDK2/CYCLIN A COMPLEXED WITH THE INHIBITOR NU6102                                              | TRANSFERASE                          |
| 1H1V | GELSOLIN G4-G6/ACTIN COMPLEX                                                                                                     | ACTIN-BINDING                        |
| 1H24 | CDK2/CYCLIN A IN COMPLEX WITH A 9 RESIDUE RECRUITMENT PEPTIDE FROM E2F                                                           | TRANSFERASE                          |
| 1H25 | CDK2/CYCLIN A IN COMPLEX WITH AN 11-RESIDUE RECRUITMENT PEPTIDE FROM RETINOBLASTOMA-ASSOCIATED PROTEIN                           | TRANSFERASE                          |
| 1H26 | CDK2/CYCLIN A IN COMPLEX WITH AN 11-RESIDUE RECRUITMENT                                                                          | CELL CYCLE                           |

| PEPTIDE FROM P53 |                                                                                                                                 |                                      |
|------------------|---------------------------------------------------------------------------------------------------------------------------------|--------------------------------------|
| 1H27             | CDK2/CYCLIN A IN COMPLEX WITH AN 11-RESIDUE RECRUITMENT PEPTIDE FROM P27                                                        | CELL CYCLE                           |
| 1H28             | CDK2/CYCLIN A IN COMPLEX WITH AN 11-RESIDUE RECRUITMENT PEPTIDE FROM P107                                                       | CELL CYCLE                           |
| 1H2A             | SINGLE CRYSTALS OF HYDROGENASE FROM DESULFOVIBRIO VULGARIS                                                                      | OXIDOREDUCTASE                       |
| 1H2G             | ALTERED SUBSTRATE SPECIFICITY MUTANT OF PENICILLIN ACYLASE                                                                      | AMIDOHYDROLASE                       |
| 1H2K             | FACTOR INHIBITING HIF-1 ALPHA IN COMPLEX WITH HIF-1 ALPHA FRAGMENT PEPTIDE                                                      | TRANSCRIPTION ACTIVATOR/INHIBITOR    |
| 1H2L             | FACTOR INHIBITING HIF-1 ALPHA IN COMPLEX WITH HIF-1 ALPHA FRAGMENT PEPTIDE                                                      | TRANSCRIPTION ACTIVATOR/INHIBITOR    |
| 1H2M             | FACTOR INHIBITING HIF-1 ALPHA IN COMPLEX WITH HIF-1 ALPHA FRAGMENT PEPTIDE                                                      | TRANSCRIPTION ACTIVATOR/INHIBITOR    |
| 1H2R             | THREE-DIMENSIONAL STRUCTURE OF NI-FE HYDROGENASE FROM DESULFIVIBRIO VULGARIS MIYAZAKI F IN THE REDUCED FORM AT 1.4 Å RESOLUTION | OXIDOREDUCTASE                       |
| 1H2S             | MOLECULAR BASIS OF TRANSMEMBRANE SIGNALLING BY SENSORY RHODOPSIN II-TRANSDUCER COMPLEX                                          | MENBRANE PROTEIN COMPLEX             |
| 1H2U             | STRUCTURE OF THE HUMAN NUCLEAR CAP-BINDING-COMPLEX (CBC) IN COMPLEX WITH A CAP ANALOGUE M7GPPG                                  | NUCLEAR PROTEIN                      |
| 1H31             | OXIDISED SOXAX COMPLEX FROM RHODOVULUM SULFIDOPHILUM                                                                            | ELECTRON TRANSFER                    |
| 1H30             | CRYSTAL STRUCTURE OF THE HUMAN TAF4-TAF12 (TAFII135-TAFII20) COMPLEX                                                            | TRANSCRIPTION/TBP-ASSOCIATED FACTORS |
| 1H4I             | METHYLOBACTERIUM EXTORQUENS METHANOL DEHYDROGENASE                                                                              | DEHYDROGENASE                        |
| 1H4J             | METHYLOBACTERIUM EXTORQUENS METHANOL DEHYDROGENASE D303E MUTANT                                                                 | DEHYDROGENASE                        |
| 1H4L             | STRUCTURE AND REGULATION OF THE CDK5-P25(NCK5A) COMPLEX                                                                         | COMPLEX(CYCLINS/CDK)                 |
| 1H59             | COMPLEX OF IGFBP-5 WITH IGF-1                                                                                                   | INSULIN                              |
| 1H5R             | THYMIDYLYLTRANSFERASE COMPLEXED WITH THYMIDINE AND GLUCOSE-1-PHOSPHATE                                                          | TRANSFERASE                          |
| 1H5T             | THYMIDYLYLTRANSFERASE COMPLEXED WITH THYMIDYLYLDIPHOSPHATE-GLUCOSE                                                              | TRANSFERASE                          |
| 1H6K             | NUCLEAR CAP BINDING COMPLEX                                                                                                     | NUCLEAR PROTEIN                      |
| 1H6W             | CRYSTAL STRUCTURE OF A HEAT-AND PROTEASE-STABLE FRAGMENT OF THE BACTERIOPHAGE T4 SHORT FIBRE                                    | STRUCTURAL PROTEIN                   |
| 1H88             | CRYSTAL STRUCTURE OF TERNARY PROTEIN-DNA COMPLEX1                                                                               | TRANSCRIPTION/DNA                    |
| 1H89             | CRYSTAL STRUCTURE OF TERNARY PROTEIN-DNA COMPLEX2                                                                               | TRANSCRIPTION/DNA                    |
| 1H8A             | CRYSTAL STRUCTURE OF TERNARY PROTEIN-DNA COMPLEX3                                                                               | TRANSCRIPTION/DNA                    |
| 1H8E             | (ADP.ALF4)2(ADP.SO4) BOVINE F1-ATPASE (ALL THREE CATALYTIC SITES OCCUPIED)                                                      | ATP PHOSPHORYLASE                    |



|      |                                                                                                                                           |                                      |
|------|-------------------------------------------------------------------------------------------------------------------------------------------|--------------------------------------|
| 1H8H | BOVINE MITOCHONDRIAL F1-ATPASE CRYSTALLISED IN THE PRESENCE OF 5MM AMPPNP                                                                 | ATP PHOSPHORYLASE                    |
| 1H8I | X-RAY CRYSTAL STRUCTURE OF HUMAN ALPHA-THROMBIN WITH A TRIPEPTIDE PHOSPHONATE INHIBITOR.                                                  | SERINE PROTEASE                      |
| 1H8T | ECHOVIRUS 11                                                                                                                              | VIRUS                                |
| 1H9D | AML1/CBF-BETA/DNA COMPLEX                                                                                                                 | TRANSCRIPTION/DNA                    |
| 1H9H | COMPLEX OF EETI-II WITH PORCINE TRYPSIN                                                                                                   | HYDROLASE INHIBITOR                  |
| 1H9I | COMPLEX OF EETI-II MUTANT WITH PORCINE TRYPSIN                                                                                            | COMPLEX (SERINE PROTEASE/INHIBITOR)  |
| 1H9S | MOLYBDATE BOUND COMPLEX OF DIMOP DOMAIN OF MODE FROM E.COLI                                                                               | TRANSCRIPTION REGULATOR              |
| 1HA7 | STRUCTURE OF A LIGHT-HARVESTING PHYCOBILIPROTEIN, C-PHYCOCYANIN FROM SPIRULINA PLATENSIS AT 2.2A RESOLUTION                               | PHOTOSYNTHESIS                       |
| 1HAB | CROSSLINKED HAEMOGLOBIN                                                                                                                   | OXYGEN TRANSPORT                     |
| 1HAC | CROSSLINKED HAEMOGLOBIN                                                                                                                   | OXYGEN TRANSPORT                     |
| 1HAH | THE ISOMORPHOUS STRUCTURES OF PRETHROMBIN2, HIRUGEN-AND PPACK-THROMBIN: CHANGES ACCOMPANYING ACTIVATION AND EXOSITE BINDING TO THROMBIN   | COMPLEX(SERINE PROTEINASE/INHIBITOR) |
| 1HAI | THE ISOMORPHOUS STRUCTURES OF PRETHROMBIN2, HIRUGEN-AND PPACK-THROMBIN: CHANGES ACCOMPANYING ACTIVATION AND EXOSITE BINDING TO THROMBIN   | HYDROLASE(SERINE PROTEINASE)         |
| 1HAO | COMPLEX OF HUMAN ALPHA-THROMBIN WITH A 15MER OLIGONUCLEOTIDE GGTTGGTGTGGTTGG (BASED ON NMR MODEL OF DNA                                   | HYDROLASE/HYDROLASE INHIBITOR/DNA    |
| 1HAP | COMPLEX OF HUMAN ALPHA-THROMBIN WITH A 15MER OLIGONUCLEOTIDE GGTTGGTGTGGTTGG (BASED ON X-RAY MODEL OF DNA)                                | HYDROLASE/HYDROLASE INHIBITOR/DNA    |
| 1HBA | HIGH-RESOLUTION X-RAY STUDY OF DEOXYHEMOGLOBIN ROTHSCHILD 37BETA TRP-> ARG: A MUTATION THAT CREATES AN INTERSUBUNIT CHLORIDE-BINDING SITE | OXYGEN TRANSPORT                     |
| 1HBB | HIGH-RESOLUTION X-RAY STUDY OF DEOXYHEMOGLOBIN ROTHSCHILD 37BETA TRP-> ARG: A MUTATION THAT CREATES AN INTERSUBUNIT CHLORIDE-BINDING SITE | OXYGEN TRANSPORT                     |
| 1HBH | STRUCTURE OF DEOXYHAEMOGLOBIN OF THE ANTARCTIC FISH PAGOTHENIA BERNACCHII AND STRUCTURAL BASIS OF THE ROOT EFFECT                         | OXYGEN CARRIER                       |
| 1HBM | METHYL-COENZYME M REDUCTASE ENZYME PRODUCT COMPLEX                                                                                        | METHANOGENESIS                       |
| 1HBN | METHYL-COENZYME M REDUCTASE                                                                                                               | METHANOGENESIS                       |
| 1HBO | METHYL-COENZYME M REDUCTASE MCR-RED1-SILENT                                                                                               | METHANOGENESIS                       |
| 1HBR | R-STATE FORM OF CHICKEN HEMOGLOBIN D                                                                                                      | OXYGEN STORAGE/TRANSPORT             |
| 1HBS | REFINED CRYSTAL STRUCTURE OF DEOXYHEMOGLOBIN S. I. RESTRAINED LEAST-SQUARES REFINEMENT AT 3.0-ANGSTROMS RESOLUTION                        | OXYGEN TRANSPORT                     |
| 1HBT | HUMAN ALPHA-THROMBIN COMPLEXED WITH A PEPTIDYL PYRIDINIUM METHYL KETONE CONTAINING BIVALENT INHIBITOR                                     | HYDROLASE                            |

|      |                                                                                                                                                                                                             |                                       |
|------|-------------------------------------------------------------------------------------------------------------------------------------------------------------------------------------------------------------|---------------------------------------|
| 1HBU | METHYL-COENZYME M REDUCTASE IN THE MCR-RED1-SILENT STATE IN COMPLEX WITH COENZYME M                                                                                                                         | METHANOGENESIS                        |
| 1HBX | TERNARY COMPLEX OF SAP-1 AND SRF WITH SPECIFIC SRE DNA                                                                                                                                                      | GENE REGULATION/DNA                   |
| 1HC9 | A-BUNGAROTOXIN COMPLEXED WITH HIGH AFFINITY PEPTIDE                                                                                                                                                         | COMPLEX (TOXIN/PEPTIDE)               |
| 1HCG | STRUCTURE OF HUMAN DES(1-45) FACTOR XA AT 2.2 ANGSTROMS RESOLUTION                                                                                                                                          | COAGULATION FACTOR                    |
| 1HCN | STRUCTURE OF HUMAN CHORIONIC GONADOTROPIN AT 2.6 ANGSTROMS RESOLUTION FROM MAD ANALYSIS OF THE SELENOMETHIONYL PROTEIN                                                                                      | HORMONE                               |
| 1HCO | THE STRUCTURE OF HUMAN CARBONMONOXY HAEMOGLOBIN AT 2.7 ANGSTROMS RESOLUTION                                                                                                                                 | OXYGEN TRANSPORT                      |
| 1HCS | NMR STRUCTURE OF THE HUMAN SRC SH2 DOMAIN COMPLEX                                                                                                                                                           | COMPLEX (SIGNAL TRANSDUCTION/PEPTIDE) |
| 1HDA | A NOVEL ALLOSTERIC MECHANISM IN HAEMOGLOBIN. STRUCTURE OF BOVINE DEOXYHAEMOGLOBIN, ABSENCE OF SPECIFIC CHLORIDE-BINDING SITES AND ORIGIN OF THE CHLORIDE-LINKED BOHR EFFECT IN BOVINE AND HUMAN HAEMOGLOBIN | OXYGEN TRANSPORT                      |
| 1HDB | ANALYSIS OF THE CRYSTAL STRUCTURE, MOLECULAR MODELING AND INFRARED SPECTROSCOPY OF THE DISTAL BETA-HEME POCKET VALINE67(E11)-THREONINE MUTATION OF HEMOGLOBIN                                               | OXYGEN TRANSPORT                      |
| 1HDM | HISTOCOMPATIBILITY ANTIGEN HLA-DM                                                                                                                                                                           | IMMUNE SYSTEM                         |
| 1HDS | MACROMOLECULAR STRUCTURE REFINEMENT BY RESTRAINED LEAST-SQUARES AND INTERACTIVE GRAPHICS AS APPLIED TO SICKLING DEER TYPE III HEMOGLOBIN                                                                    | OXYGEN TRANSPORT                      |
| 1HDT | STRUCTURE OF A RETRO-BINDING PEPTIDE INHIBITOR COMPLEXED WITH HUMAN ALPHA-THROMBIN                                                                                                                          | COMPLEX (SERINE PROTEINASE/INHIBITOR) |
| 1HE1 | CRYSTAL STRUCTURE OF THE COMPLEX BETWEEN THE GAP DOMAIN OF THE PSEUDOMONAS AERUGINOSA EXOS TOXIN AND HUMAN RAC                                                                                              | SIGNALLING COMPLEX                    |
| 1HE8 | RAS G12V-PI 3-KINASE GAMMA COMPLEX                                                                                                                                                                          | COMPLEX (PHOSPHOINOSITIDE KINASE/RAS) |
| 1HEZ | ANTIBODY-ANTIGEN COMPLEX                                                                                                                                                                                    | ANTIBODY                              |
| 1HFE | 1.6 A RESOLUTION STRUCTURE OF THE FE-ONLY HYDROGENASE FROM DESULFOVIBRIO DESULFURICANS                                                                                                                      | HYDROGENASE                           |
| 1HGA | HIGH RESOLUTION CRYSTAL STRUCTURES AND COMPARISONS OF T STATE DEOXYHAEMOGLOBIN AND TWO LIGANDED T-STATE HAEMOGLOBINS: T(ALPHA-OXY)HAEMOGLOBIN AND T(MET)HAEMOGLOBIN                                         | OXYGEN TRANSPORT                      |
| 1HGB | HIGH RESOLUTION CRYSTAL STRUCTURES AND COMPARISONS OF T STATE DEOXYHAEMOGLOBIN AND TWO LIGANDED T-STATE HAEMOGLOBINS: T(ALPHA-OXY)HAEMOGLOBIN AND T(MET)HAEMOGLOBIN                                         | OXYGEN TRANSPORT                      |
| 1HGC | HIGH RESOLUTION CRYSTAL STRUCTURES AND COMPARISONS OF T STATE DEOXYHAEMOGLOBIN AND TWO LIGANDED T-STATE HAEMOGLOBINS: T(ALPHA-OXY)HAEMOGLOBIN AND T(MET)HAEMOGLOBIN                                         | OXYGEN TRANSPORT                      |
| 1HGD | BINDING OF INFLUENZA VIRUS HEMAGGLUTININ TO ANALOGS OF ITS CELL-SURFACE RECEPTOR, SIALIC ACID: ANALYSIS BY PROTON NUCLEAR MAGNETIC RESONANCE SPECTROSCOPY AND X-RAY CRYSTALLOGRAPHY                         | VIRAL PROTEIN                         |
| 1HGE | BINDING OF INFLUENZA VIRUS HEMAGGLUTININ TO ANALOGS OF ITS CELL-SURFACE RECEPTOR, SIALIC ACID: ANALYSIS BY PROTON                                                                                           | VIRAL PROTEIN                         |

| NUCLEAR MAGNETIC RESONANCE SPECTROSCOPY AND X-RAY CRYSTALLOGRAPHY |                                                                                                                                                                                     |                                  |
|-------------------------------------------------------------------|-------------------------------------------------------------------------------------------------------------------------------------------------------------------------------------|----------------------------------|
| 1HGF                                                              | BINDING OF INFLUENZA VIRUS HEMAGGLUTININ TO ANALOGS OF ITS CELL-SURFACE RECEPTOR, SIALIC ACID: ANALYSIS BY PROTON NUCLEAR MAGNETIC RESONANCE SPECTROSCOPY AND X-RAY CRYSTALLOGRAPHY | VIRAL PROTEIN                    |
| 1HGG                                                              | BINDING OF INFLUENZA VIRUS HEMAGGLUTININ TO ANALOGS OF ITS CELL-SURFACE RECEPTOR, SIALIC ACID: ANALYSIS BY PROTON NUCLEAR MAGNETIC RESONANCE SPECTROSCOPY AND X-RAY CRYSTALLOGRAPHY | VIRAL PROTEIN                    |
| 1HGH                                                              | BINDING OF INFLUENZA VIRUS HEMAGGLUTININ TO ANALOGS OF ITS CELL-SURFACE RECEPTOR, SIALIC ACID: ANALYSIS BY PROTON NUCLEAR MAGNETIC RESONANCE SPECTROSCOPY AND X-RAY CRYSTALLOGRAPHY | VIRAL PROTEIN                    |
| 1HGI                                                              | BINDING OF INFLUENZA VIRUS HEMAGGLUTININ TO ANALOGS OF ITS CELL-SURFACE RECEPTOR, SIALIC ACID: ANALYSIS BY PROTON NUCLEAR MAGNETIC RESONANCE SPECTROSCOPY AND X-RAY CRYSTALLOGRAPHY | VIRAL PROTEIN                    |
| 1HGJ                                                              | BINDING OF INFLUENZA VIRUS HEMAGGLUTININ TO ANALOGS OF ITS CELL-SURFACE RECEPTOR, SIALIC ACID: ANALYSIS BY PROTON NUCLEAR MAGNETIC RESONANCE SPECTROSCOPY AND X-RAY CRYSTALLOGRAPHY | VIRAL PROTEIN                    |
| 1HGT                                                              | STRUCTURE OF THE HIRUGEN AND HIRULOG 1 COMPLEXES OF ALPHA-THROMBIN                                                                                                                  | HYDROLASE(SERINE PROTEASE)       |
| 1HH4                                                              | RAC1-RHO GDI COMPLEX INVOLVED IN NADPH OXIDASE ACTIVATION                                                                                                                           | SIGNAL PROTEIN INHIBITOR COMPLEX |
| 1HH6                                                              | ANTI-P24 (HIV-1) FAB FRAGMENT CB41 COMPLEXED WITH A PEPTIDE                                                                                                                         | COMPLEX (ANTIBODY/PEPTIDE)       |
| 1HH9                                                              | ANTI-P24 (HIV-1) FAB FRAGMENT CB41 COMPLEXED WITH A PEPTIDE                                                                                                                         | COMPLEX (ANTIBODY/PEPTIDE)       |
| 1HHG                                                              | THE ANTIGENIC IDENTITY OF PEPTIDE(SLASH)MHC COMPLEXES: A COMPARISON OF THE CONFORMATION OF FIVE PEPTIDES PRESENTED BY HLA-A2                                                        | HISTOCOMPATIBILITY ANTIGEN       |
| 1HHH                                                              | THE ANTIGENIC IDENTITY OF PEPTIDE(SLASH)MHC COMPLEXES: A COMPARISON OF THE CONFORMATION OF FIVE PEPTIDES PRESENTED BY HLA-A2                                                        | HISTOCOMPATIBILITY ANTIGEN       |
| 1HHI                                                              | THE ANTIGENIC IDENTITY OF PEPTIDE(SLASH)MHC COMPLEXES: A COMPARISON OF THE CONFORMATION OF FIVE PEPTIDES PRESENTED BY HLA-A2                                                        | HISTOCOMPATIBILITY ANTIGEN       |
| 1HHJ                                                              | THE ANTIGENIC IDENTITY OF PEPTIDE(SLASH)MHC COMPLEXES: A COMPARISON OF THE CONFORMATION OF FIVE PEPTIDES PRESENTED BY HLA-A2                                                        | HISTOCOMPATIBILITY ANTIGEN       |
| 1HHK                                                              | THE ANTIGENIC IDENTITY OF PEPTIDE(SLASH)MHC COMPLEXES: A COMPARISON OF THE CONFORMATION OF FIVE PEPTIDES PRESENTED BY HLA-A2                                                        | HISTOCOMPATIBILITY ANTIGEN       |
| 1HHO                                                              | STRUCTURE OF HUMAN OXYHAEMOGLOBIN AT 2.1 ANGSTROMS RESOLUTION                                                                                                                       | OXYGEN TRANSPORT                 |
| 1HI6                                                              | ANTI-P24 (HIV-1) FAB FRAGMENT CB41 COMPLEXED WITH A PEPTIDE                                                                                                                         | COMPLEX (ANTIBODY/PEPTIDE)       |
| 1HIA                                                              | KALLIKREIN COMPLEXED WITH HIRUSTASIN                                                                                                                                                | COMPLEX (PROTEASE/INHIBITOR)     |
| 1HIL                                                              | STRUCTURAL EVIDENCE FOR INDUCED FIT AS A MECHANISM FOR                                                                                                                              | IMMUNOGLOBULIN                   |

## ANTIGEN-ANTIBODY RECOGNITION

|      |                                                                                                                                      |                                        |
|------|--------------------------------------------------------------------------------------------------------------------------------------|----------------------------------------|
| 1HIN | STRUCTURAL EVIDENCE FOR INDUCED FIT AS A MECHANISM FOR ANTIBODY-ANTIGEN RECOGNITION                                                  | IMMUNOGLOBULIN                         |
| 1HIV | CRYSTAL STRUCTURE OF A COMPLEX OF HIV-1 PROTEASE WITH A DIHYDROETHYLENE-CONTAINING INHIBITOR: COMPARISONS WITH MOLECULAR MODELING    | HYDROLASE(ACID PROTEINASE)             |
| 1HJA | LYS 18 VARIANT OF TURKEY OVOMUCOID INHIBITOR THIRD DOMAIN COMPLEXED WITH ALPHA-CHYMOTRYPSIN                                          | COMPLEX (HYDROLASE/INHIBITOR)          |
| 1HJB | CRYSTAL STRUCTURE OF RUNX-1/AML1/CBFALPHA RUNT DOMAIN AND C/EBPBETA BZIP HOMODIMER BOUND TO A DNA FRAGMENT FROM THE CSF-1R PROMOTER  | TRANSCRIPTION/DNA                      |
| 1HKL | FREE AND LIGANDED FORM OF AN ESTEROLYTIC CATALYTIC ANTIBODY                                                                          | CATALYTIC ANTIBODY                     |
| 1HL3 | CTBP/BARS IN TERNARY COMPLEX WITH NAD(H) AND PIDLSKK PEPTIDE                                                                         | TRANSCRIPTION CO-REPRESSOR             |
| 1HL6 | A NOVEL MODE OF RBD-PROTEIN RECOGNITION IN THE Y14-MAGO COMPLEX                                                                      | SIGNAL PROTEIN                         |
| 1HLE | CRYSTAL STRUCTURE OF CLEAVED EQUINE LEUCOCYTE ELASTASE INHIBITOR DETERMINED AT 1.95 ANGSTROMS RESOLUTION                             | HYDROLASE INHIBITOR(SERINE PROTEINASE) |
| 1HLT | THE STRUCTURE OF A NONADECAPEPTIDE OF THE FIFTH EGF DOMAIN OF THROMBOMODULIN COMPLEXED WITH THROMBIN                                 | COMPLEX(SERINE PROTEINASE/INHIBITOR)   |
| 1HLU | STRUCTURE OF BOVINE BETA-ACTIN-PROFILIN COMPLEX WITH ACTIN BOUND ATP PHOSPHATES SOLVENT ACCESSIBLE                                   | COMPLEX (ACETYLTATION/ACTIN-BINDING)   |
| 1HMV | THE STRUCTURE OF UNLIGANDED REVERSE TRANSCRIPTASE FROM THE HUMAN IMMUNODEFICIENCY VIRUS TYPE 1                                       | NUCLEOTIDYLTRANSFERASE                 |
| 1HNI | STRUCTURE OF HIV-1 REVERSE TRANSCRIPTASE IN A COMPLEX WITH THE NONNUCLEOSIDE INHIBITOR ALPHA-APA R 95845 AT 2.8 ANGSTROMS RESOLUTION | NUCLEOTIDYLTRANSFERASE                 |
| 1HNV | STRUCTURE OF HIV-1 RT(SLASH)TIBO R 86183 COMPLEX REVEALS SIMILARITY IN THE BINDING OF DIVERSE NONNUCLEOSIDE INHIBITORS               | NUCLEOTIDYLTRANSFERASE                 |
| 1HNW | STRUCTURE OF THE THERMUS THERMOPHILUS 30S RIBOSOMAL SUBUNIT IN COMPLEX WITH TETRACYCLINE                                             | RIBOSOME                               |
| 1HNX | STRUCTURE OF THE THERMUS THERMOPHILUS 30S RIBOSOMAL SUBUNIT IN COMPLEX WITH PACTAMYCIN                                               | RIBOSOME                               |
| 1HNZ | STRUCTURE OF THE THERMUS THERMOPHILUS 30S RIBOSOMAL SUBUNIT IN COMPLEX WITH HYGROMYCIN B                                             | RIBOSOME                               |
| 1HOC | THE THREE-DIMENSIONAL STRUCTURE OF H-2DB AT 2.4 ANGSTROMS RESOLUTION: IMPLICATIONS FOR ANTIGEN-DETERMINANT SELECTION                 | HISTOCOMPATIBILITY ANTIGEN             |
| 1HPG | A GLUTAMIC ACID SPECIFIC SERINE PROTEASE UTILIZES A NOVEL HISTIDINE TRIAD IN SUBSTRATE BINDING                                       | HYDROLASE (SERINE PROTEASE)            |
| 1HPZ | HUMAN IMMUNODEFICIENCY VIRUS TYPE 1                                                                                                  | TRANSFERASE                            |
| 1HQ3 | CRYSTAL STRUCTURE OF THE HISTONE-CORE-OCTAMER IN KCL/PHOSPHATE                                                                       | DNA BINDING PROTEIN                    |
| 1HQ4 | STRUCTURE OF NATIVE CATALYTIC ANTIBODY HA5-19A4                                                                                      | IMMUNE SYSTEM                          |

|      |                                                                                                                                                                                                                            |                                         |
|------|----------------------------------------------------------------------------------------------------------------------------------------------------------------------------------------------------------------------------|-----------------------------------------|
| 1HQ6 | STRUCTURE OF PYRUVOYL-DEPENDENT HISTIDINE DECARBOXYLASE AT PH 8                                                                                                                                                            | LYASE                                   |
| 1HQE | HUMAN IMMUNODEFICIENCY VIRUS TYPE 1                                                                                                                                                                                        | TRANSFERASE                             |
| 1HQM | CRYSTAL STRUCTURE OF THERMUS AQUATICUS CORE RNA POLYMERASE- INCLUDES COMPLETE STRUCTURE WITH SIDE-CHAINS (EXCEPT FOR DISORDERED REGIONS)-FURTHER REFINED FROM ORIGINAL DEPOSITION-CONTAINS ADDITIONAL SEQUENCE INFORMATION | TRANSCRIPTION                           |
| 1HQR | CRYSTAL STRUCTURE OF A SUPERANTIGEN BOUND TO THE HIGH-AFFINITY, ZINC-DEPENDENT SITE ON MHC CLASS II                                                                                                                        | IMMUNE SYSTEM                           |
| 1HQU | HUMAN IMMUNODEFICIENCY VIRUS TYPE 1                                                                                                                                                                                        | TRANSFERASE                             |
| 1HQY | NUCLEOTIDE-DEPENDENT CONFORMATIONAL CHANGES IN A PROTEASE-ASSOCIATED ATPASE HSLU                                                                                                                                           | CHAPERONE                               |
| 1HR0 | CRYSTAL STRUCTURE OF INITIATION FACTOR IF1 BOUND TO THE 30S RIBOSOMAL SUBUNIT                                                                                                                                              | RIBOSOME                                |
| 1HR6 | YEAST MITOCHONDRIAL PROCESSING PEPTIDASE                                                                                                                                                                                   | HYDROLASE                               |
| 1HR7 | YEAST MITOCHONDRIAL PROCESSING PEPTIDASE BETA-E73Q MUTANT                                                                                                                                                                  | HYDROLASE                               |
| 1HR8 | YEAST MITOCHONDRIAL PROCESSING PEPTIDASE BETA-E73Q MUTANT COMPLEXED WITH CYTOCHROME C OXIDASE IV SIGNAL PEPTIDE                                                                                                            | HYDROLASE                               |
| 1HR9 | YEAST MITOCHONDRIAL PROCESSING PEPTIDASE BETA-E73Q MUTANT COMPLEXED WITH MALATE DEHYDROGENASE SIGNAL PEPTIDE                                                                                                               | HYDROLASE                               |
| 1HRP | CRYSTAL STRUCTURE OF HUMAN CHORIONIC GONADOTROPIN                                                                                                                                                                          | HORMONE                                 |
| 1HRT | THE STRUCTURE OF A COMPLEX OF BOVINE ALPHA-THROMBIN AND RECOMBINANT HIRUDIN AT 2.8 ANGSTROMS RESOLUTION                                                                                                                    | HYDROLASE(SERINE PROTEINASE)            |
| 1HSA | THE THREE-DIMENSIONAL STRUCTURE OF HLA-B27 AT 2.1 ANGSTROMS RESOLUTION SUGGESTS A GENERAL MECHANISM FOR TIGHT PEPTIDE BINDING TO MHC                                                                                       | HISTOCOMPATIBILITY ANTIGEN              |
| 1HSB | DIFFERENT LENGTH PEPTIDES BIND TO HLA-AW68 SIMILARLY AT THEIR ENDS BUT BULGE OUT IN THE MIDDLE                                                                                                                             | HISTOCOMPATIBILITY ANTIGEN              |
| 1HT1 | NUCLEOTIDE-DEPENDENT CONFORMATIONAL CHANGES IN A PROTEASE-ASSOCIATED ATPASE HSLU                                                                                                                                           | CHAPERONE                               |
| 1HT2 | NUCLEOTIDE-DEPENDENT CONFORMATIONAL CHANGES IN A PROTEASE-ASSOCIATED ATPASE HSLU                                                                                                                                           | CHAPERONE                               |
| 1HTE | X-RAY CRYSTALLOGRAPHIC STUDIES OF A SERIES OF PENICILLIN-DERIVED ASYMMETRIC INHIBITORS OF HIV-1 PROTEASE                                                                                                                   | HYDROLASE(ACID PROTEINASE)              |
| 1HTL | MUTATION OF A BURIED RESIDUE CAUSES LACK OF ACTIVITY BUT NO CONFORMATIONAL CHANGE: CRYSTAL STRUCTURE OF E. COLI HEAT-LABILE ENTEROTOXIN MUTANT VAL 97--> LYS                                                               | ENTEROTOXIN                             |
| 1HTM | STRUCTURE OF INFLUENZA HAEMAGGLUTININ AT THE PH OF MEMBRANE FUSION                                                                                                                                                         | VIRAL PROTEIN                           |
| 1HTR | CRYSTAL AND MOLECULAR STRUCTURES OF HUMAN PROGASTRICIN AT 1.62 ANGSTROMS RESOLUTION                                                                                                                                        | ASPARTYL PROTEASE                       |
| 1HTT | HISTIDYL-TRNA SYNTHETASE                                                                                                                                                                                                   | COMPLEX (TRNA SYNTHETASE/HIS-ADENYLATE) |
| 1HTV | CRYSTAL STRUCTURE OF DESTRIPEPTIDE (B28-B30) INSULIN                                                                                                                                                                       | HORMONE/GROWTH FACTOR                   |

|      |                                                                                                                                                |                                     |
|------|------------------------------------------------------------------------------------------------------------------------------------------------|-------------------------------------|
| 1HUT | THE STRUCTURE OF ALPHA-THROMBIN INHIBITED BY A 15-MER SINGLE-STRANDED DNA APTAMER                                                              | HYDROLASE, BLOOD CLOTTING/DNA       |
| 1HV4 | CRYSTAL STRUCTURE ANALYSIS OF BAR-HEAD GOOSE HEMOGLOBIN (DEOXY FORM)                                                                           | OXYGEN STORAGE/TRANSPORT            |
| 1HVU | HUMAN IMMUNODEFICIENCY VIRUS TYPE 1 REVERSE TRANSCRIPTASE COMPLEXED WITH A 33-BASE NUCLEOTIDE RNA PSEUDOKNOT                                   | TRANSFERASE/RNA                     |
| 1HWG | 1:2 COMPLEX OF HUMAN GROWTH HORMONE WITH ITS SOLUBLE BINDING PROTEIN                                                                           | COMPLEX (HORMONE/RECEPTOR)          |
| 1HWH | 1:1 COMPLEX OF HUMAN GROWTH HORMONE MUTANT G120R WITH ITS SOLUBLE BINDING PROTEIN                                                              | COMPLEX (HORMONE/RECEPTOR)          |
| 1HWM | EBULIN, ORTHORHOMBIC CRYSTAL FORM MODEL                                                                                                        | HYDROLASE                           |
| 1HWN | EBULIN COMPLEXED WITH GALACTOSE, TRIGONAL CRYSTAL FORM                                                                                         | HYDROLASE                           |
| 1HWO | EBULIN COMPLEXED WITH LACTOSE, TRIGONAL CRYSTAL FORM                                                                                           | HYDROLASE                           |
| 1HWP | EBULIN COMPLEXED WITH PTEROIC ACID, TRIGONAL CRYSTAL FORM                                                                                      | HYDROLASE                           |
| 1HX1 | CRYSTAL STRUCTURE OF A BAG DOMAIN IN COMPLEX WITH THE HSC70 ATPASE DOMAIN                                                                      | CHAPERONE/CHAPERONE INHIBITOR       |
| 1HXE | SERINE PROTEASE                                                                                                                                | COMPLEX (SERINE PROTEASE/INHIBITOR) |
| 1HXF | HUMAN THROMBIN COMPLEX WITH HIRUDIN VARIANT                                                                                                    | COMPLEX (SERINE PROTEASE/INHIBITOR) |
| 1HXM | CRYSTAL STRUCTURE OF A HUMAN VGAMMA9/VDELTA2 T CELL RECEPTOR                                                                                   | IMMUNE SYSTEM                       |
| 1HXY | CRYSTAL STRUCTURE OF STAPHYLOCOCCAL ENTEROTOXIN H IN COMPLEX WITH HUMAN MHC CLASS II                                                           | IMMUNE SYSTEM/TOXIN                 |
| 1HYM | HYDROLYZED TRYPSIN INHIBITOR (CMTI-V, MINIMIZED AVERAGE NMR STRUCTURE)                                                                         | HYDROLASE (SERINE PROTEINASE)       |
| 1HYR | CRYSTAL STRUCTURE OF HUMAN MICA IN COMPLEX WITH NATURAL KILLER CELL RECEPTOR NKG2D                                                             | IMMUNE SYSTEM                       |
| 1HYS | CRYSTAL STRUCTURE OF HIV-1 REVERSE TRANSCRIPTASE IN COMPLEX WITH A POLYPURINE TRACT RNA:DNA                                                    | TRANSFERASE/DNA/RNA                 |
| 1HZH | CRYSTAL STRUCTURE OF THE INTACT HUMAN IGG B12 WITH BROAD AND POTENT ACTIVITY AGAINST PRIMARY HIV-1 ISOLATES: A TEMPLATE FOR HIV VACCINE DESIGN | IMMUNE SYSTEM                       |
| 1HZZ | THE ASYMMETRIC COMPLEX OF THE TWO NUCLEOTIDE-BINDING COMPONENTS (DI, DIII) OF PROTON-TRANSLOCATING TRANSHYDROGENASE                            | OXIDOREDUCTASE                      |
| 1I1A | CRYSTAL STRUCTURE OF THE NEONATAL FC RECEPTOR COMPLEXED WITH A HETERODIMERIC FC                                                                | IMMUNE SYSTEM                       |
| 1I1F | CRYSTAL STRUCTURE OF HUMAN CLASS I MHC (HLA-A2.1) COMPLEXED WITH BETA 2-MICROGLOBULIN AND HIV-RT VARIANT PEPTIDE I1Y                           | IMMUNE SYSTEM                       |
| 1I1Q | STRUCTURE OF THE COOPERATIVE ALLOSTERIC ANTHRANILATE SYNTHASE FROM SALMONELLA TYPHIMURIUM                                                      | LYASE                               |
| 1I1R | CRYSTAL STRUCTURE OF A CYTOKINE/RECEPTOR COMPLEX                                                                                               | CYTOKINE                            |
| 1I1Y | CRYSTAL STRUCTURE OF HUMAN CLASS I MHC (HLA-A2.1) COMPLEXED                                                                                    | IMMUNE SYSTEM                       |

## WITH BETA 2-MICROGLOBULIN AND HIV-RT VARIANT PEPTIDE I1Y

|      |                                                                                                                                                                 |                               |
|------|-----------------------------------------------------------------------------------------------------------------------------------------------------------------|-------------------------------|
| 112M | RAN-RCC1-SO4 COMPLEX                                                                                                                                            | CELL CYCLE                    |
| 113O | CRYSTAL STRUCTURE OF THE COMPLEX OF XIAP-BIR2 AND CASPASE 3                                                                                                     | APOPTOSIS                     |
| 113Q | RNA POLYMERASE II CRYSTAL FORM I AT 3.1 A RESOLUTION                                                                                                            | TRANSCRIPTION                 |
| 114D | CRYSTAL STRUCTURE ANALYSIS OF RAC1-GDP COMPLEXED WITH ARFAPTIN (P21)                                                                                            | SIGNALING PROTEIN             |
| 114E | CRYSTAL STRUCTURE OF THE CASPASE-8/P35 COMPLEX                                                                                                                  | APOPTOSIS/HYDROLASE           |
| 114F | CRYSTAL STRUCTURE OF HLA-A*0201/MAGE-A4-PEPTIDE COMPLEX                                                                                                         | IMMUNE SYSTEM                 |
| 114L | CRYSTAL STRUCTURE ANALYSIS OF RAC1-GDP IN COMPLEX WITH ARFAPTIN (P41)                                                                                           | SIGNALING PROTEIN             |
| 114O | CRYSTAL STRUCTURE OF THE XIAP/CASPASE-7 COMPLEX                                                                                                                 | APOPTOSIS/HYDROLASE           |
| 114T | CRYSTAL STRUCTURE ANALYSIS OF RAC1-GMPPNP IN COMPLEX WITH ARFAPTIN                                                                                              | SIGNALING PROTEIN             |
| 1150 | RNA POLYMERASE II CRYSTAL FORM II AT 2.8 A RESOLUTION                                                                                                           | TRANSCRIPTION                 |
| 1151 | CRYSTAL STRUCTURE OF CASPASE-7 COMPLEXED WITH XIAP                                                                                                              | HYDROLASE/HYDROLASE INHIBITOR |
| 115K | STRUCTURE AND BINDING DETERMINANTS OF THE RECOMBINANT KRINGLE-2 DOMAIN OF HUMAN PLASMINOGEN TO AN INTERNAL PEPTIDE FROM A GROUP A STREPTOCOCCAL SURFACE PROTEIN | BLOOD CLOTTING                |
| 115O | CRYSTAL STRUCTURE OF MUTANT R105A OF E. COLI ASPARTATE TRANSCARBAMOYLASE                                                                                        | TRANSFERASE                   |
| 116H | RNA POLYMERASE II ELONGATION COMPLEX                                                                                                                            | TRANSCRIPTION/DNA/RNA         |
| 116V | THERMUS AQUATICUS CORE RNA POLYMERASE-RIFAMPICIN COMPLEX                                                                                                        | TRANSCRIPTION                 |
| 1172 | HUMAN S-ADENOSYLMETHIONINE DECARBOXYLASE WITH COVALENTLY BOUND PYRUVOYL GROUP AND COVALENTLY BOUND 5'-DEOXY-5'-[N-METHYL-N-(2-AMINOXYETHYL) AMINO]ADENOSINE     | LYASE                         |
| 1173 | COMPLEX OF PRO-LEU-L-TRP PHOSPHONATE WITH THE CATALITIC DOMAIN OF MATRIX METALLO PROTEINASE-8 (MET80 FORM)                                                      | HYDROLASE                     |
| 1179 | HUMAN S-ADENOSYLMETHIONINE DECARBOXYLASE WITH COVALENTLY BOUND PYRUVOYL GROUP AND COVALENTLY BOUND 5'-DEOXY-5'-{(3-HYDRAZINOPROPYL)METHYLAMINO}ADENOSINE        | LYASE                         |
| 117A | EVH1 DOMAIN FROM MURINE HOMER 2B/VESL 2                                                                                                                         | SIGNALING PROTEIN             |
| 117B | HUMAN S-ADENOSYLMETHIONINE DECARBOXYLASE WITH COVALENTLY BOUND PYRUVOYL GROUP AND COVALENTLY BOUND S-ADENOSYLMETHIONINE METHYL ESTER                            | LYASE                         |
| 117C | HUMAN S-ADENOSYLMETHIONINE DECARBOXYLASE WITH COVALENTLY BOUND PYRUVOYL GROUP AND COMPLEXED WITH METHYLGLYOXAL BIS-(GUANYLHYDRAZONE)                            | LYASE                         |
| 117M | HUMAN S-ADENOSYLMETHIONINE DECARBOXYLASE WITH COVALENTLY BOUND PYRUVOYL GROUP AND COMPLEXED WITH 4-AMIDINOINDAN-1-ONE-2'-AMIDINOHYDRAZONE                       | LYASE                         |
| 117R | CRYSTAL STRUCTURE OF CLASS I MHC A2 IN COMPLEX WITH PEPTIDE P1058                                                                                               | IMMUNE SYSTEM                 |

|      |                                                                                                                                                                                                                                                           |                                     |
|------|-----------------------------------------------------------------------------------------------------------------------------------------------------------------------------------------------------------------------------------------------------------|-------------------------------------|
| 117S | ANTHRANILATE SYNTHASE FROM SERRATIA MARCESCENS IN COMPLEX WITH ITS END PRODUCT INHIBITOR L-TRYPTOPHAN                                                                                                                                                     | LYASE                               |
| 117T | CRYSTAL STRUCTURE OF CLASS I MHC A2 IN COMPLEX WITH PEPTIDE P1049-5V                                                                                                                                                                                      | IMMUNE SYSTEM                       |
| 117U | CRYSTAL STRUCTURE OF CLASS I MHC A2 IN COMPLEX WITH PEPTIDE P1049-6V                                                                                                                                                                                      | IMMUNE SYSTEM                       |
| 117W | BETA-CATENIN/PHOSPHORYLATED E-CADHERIN COMPLEX                                                                                                                                                                                                            | CELL ADHESION                       |
| 117X | BETA-CATENIN/E-CADHERIN COMPLEX                                                                                                                                                                                                                           | CELL ADHESION                       |
| 117Y | CRYSTAL STRUCTURE OF C-PHYCOCYANIN OF SYNECHOCOCCUS VULCANUS AT 2.5 ANGSTROMS.                                                                                                                                                                            | PHOTOSYNTHESIS                      |
| 117Z | ANTIBODY GNC92H2 BOUND TO LIGAND                                                                                                                                                                                                                          | IMMUNE SYSTEM                       |
| 1184 | CRYO-EM STRUCTURE OF THE HEAVY MEROMYOSIN SUBFRAGMENT OF CHICKEN GIZZARD SMOOTH MUSCLE MYOSIN WITH REGULATORY LIGHT CHAIN IN THE DEPHOSPHORYLATED STATE. ONLY C ALPHAS PROVIDED FOR REGULATORY LIGHT CHAIN. ONLY BACKBONE ATOMS PROVIDED FOR S2 FRAGMENT. | CONTRACTILE PROTEIN                 |
| 118L | HUMAN B7-1/CTLA-4 CO-STIMULATORY COMPLEX                                                                                                                                                                                                                  | IMMUNE SYSTEM                       |
| 118M | CRYSTAL STRUCTURE OF A RECOMBINANT ANTI-SINGLE-STRANDED DNA ANTIBODY FRAGMENT COMPLEXED WITH DT5                                                                                                                                                          | IMMUNE SYSTEM/DNA                   |
| 1194 | CRYSTAL STRUCTURES OF THE SMALL RIBOSOMAL SUBUNIT WITH TETRACYCLINE, EDEINE AND IF3                                                                                                                                                                       | RIBOSOME                            |
| 119C | GLUTAMATE MUTASE FROM CLOSTRIDIUM COCHLEARIUM: COMPLEX WITH ADENOSYLCOBALAMIN AND SUBSTRATE                                                                                                                                                               | ISOMERASE                           |
| 119I | NATIVE CRYSTAL STRUCTURE OF THE RECOMBINANT MONOCLONAL WILD TYPE ANTI-TESTOSTERONE FAB FRAGMENT                                                                                                                                                           | IMMUNE SYSTEM                       |
| 119J | TESTOSTERONE COMPLEX STRUCTURE OF THE RECOMBINANT MONOCLONAL WILD TYPE ANTI-TESTOSTERONE FAB FRAGMENT                                                                                                                                                     | IMMUNE SYSTEM                       |
| 119R | STRUCTURE OF CD40L IN COMPLEX WITH THE FAB FRAGMENT OF HUMANIZED 5C8 ANTIBODY                                                                                                                                                                             | CYTOKINE/IMMUNE SYSTEM              |
| 11A0 | KIF1A HEAD-MICROTUBULE COMPLEX STRUCTURE IN ATP-FORM                                                                                                                                                                                                      | TRANSPORT PROTEIN                   |
| 11AI | IDIOTYPE-ANTI-IDIOTYPE FAB COMPLEX                                                                                                                                                                                                                        | COMPLEX (IMMUNOGLOBULIN IGG1/IGG2A) |
| 11AK | HISTOCOMPATIBILITY ANTIGEN I-AK                                                                                                                                                                                                                           | HISTOCOMPATIBILITY ANTIGEN I-AK     |
| 11AO | CLASS II MHC I-AD IN COMPLEX WITH OVALBUMIN PEPTIDE 323-339                                                                                                                                                                                               | MHC II                              |
| 11AR | INTERLEUKIN-4 / RECEPTOR ALPHA CHAIN COMPLEX                                                                                                                                                                                                              | CYTOKINE/RECEPTOR                   |
| 11AU | HUMAN GRANZYME B IN COMPLEX WITH AC-IEPD-CHO                                                                                                                                                                                                              | HYDROLASE                           |
| 11B1 | CRYSTAL STRUCTURE OF THE 14-3-3 ZETA:SEROTONIN N-ACETYLTRANSFERASE COMPLEX                                                                                                                                                                                | SIGNALING PROTEIN/TRANSFERASE       |
| 11BC | CRYSTAL STRUCTURE OF INHIBITED INTERLEUKIN-1BETA CONVERTING ENZYME                                                                                                                                                                                        | COMPLEX (HYDROLASE/PEPTIDE)         |
| 11BE | DEOXY-HAEMOGLOBIN TRAPPED IN THE HIGH-AFFINITY (R) STATE                                                                                                                                                                                                  | OXYGEN TRANSPORT                    |



|      |                                                                                                                                                                                                           |                                    |
|------|-----------------------------------------------------------------------------------------------------------------------------------------------------------------------------------------------------------|------------------------------------|
| 1IBG | STRUCTURE AND SPECIFICITY OF THE ANTI-DIGOXIN ANTIBODY 40-50                                                                                                                                              | IMMUNOGLOBULIN                     |
| 1IBK | STRUCTURE OF THE THERMUS THERMOPHILUS 30S RIBOSOMAL SUBUNIT IN COMPLEX WITH THE ANTIBIOTIC PAROMOMYCIN                                                                                                    | RIBOSOME                           |
| 1IBL | STRUCTURE OF THE THERMUS THERMOPHILUS 30S RIBOSOMAL SUBUNIT IN COMPLEX WITH A MESSENGER RNA FRAGMENT AND COGNATE TRANSFER RNA ANTICODON STEM-LOOP BOUND AT THE A SITE AND WITH THE ANTIBIOTIC PAROMOMYCIN | RIBOSOME                           |
| 1IBM | STRUCTURE OF THE THERMUS THERMOPHILUS 30S RIBOSOMAL SUBUNIT IN COMPLEX WITH A MESSENGER RNA FRAGMENT AND COGNATE TRANSFER RNA ANTICODON STEM-LOOP BOUND AT THE A SITE                                     | RIBOSOME                           |
| 1IBR | COMPLEX OF RAN WITH IMPORTIN BETA                                                                                                                                                                         | CELL CYCLE,TRANSLATION             |
| 1IBT | STRUCTURE OF THE D53,54N MUTANT OF HISTIDINE DECARBOXYLASE AT-170 C                                                                                                                                       | LYASE                              |
| 1IBU | STRUCTURE OF THE D53,54N MUTANT OF HISTIDINE DECARBOXYLASE AT 25 C                                                                                                                                        | LYASE                              |
| 1IBV | STRUCTURE OF THE D53,54N MUTANT OF HISTIDINE DECARBOXYLASE BOUND WITH HISTIDINE METHYL ESTER AT-170 C                                                                                                     | LYASE                              |
| 1IBW | STRUCTURE OF THE D53,54N MUTANT OF HISTIDINE DECARBOXYLASE BOUND WITH HISTIDINE METHYL ESTER AT 25 C                                                                                                      | LYASE                              |
| 1IC4 | CRYSTAL STRUCTURE OF HYHEL-10 FV MUTANT(HD32A)-HEN LYSOZYME COMPLEX                                                                                                                                       | PROTEIN BINDING/HYDROLASE          |
| 1IC5 | CRYSTAL STRUCTURE OF HYHEL-10 FV MUTANT(HD99A)-HEN LYSOZYME COMPLEX                                                                                                                                       | PROTEIN BINDING/HYDROLASE          |
| 1IC7 | CRYSTAL STRUCTURE OF HYHEL-10 FV MUTANT(HD32A99A)-HEN LYSOZYME COMPLEX                                                                                                                                    | PROTEIN BINDING/HYDROLASE          |
| 1ICE | STRUCTURE AND MECHANISM OF INTERLEUKIN-1BETA CONVERTING ENZYME                                                                                                                                            | CYTOKINE                           |
| 1ICF | CRYSTAL STRUCTURE OF MHC CLASS II ASSOCIATED P41 II FRAGMENT IN COMPLEX WITH CATHEPSIN L                                                                                                                  | HYDROLASE                          |
| 1ID3 | CRYSTAL STRUCTURE OF THE YEAST NUCLEOSOME CORE PARTICLE REVEALS FUNDAMENTAL DIFFERENCES IN INTER-NUCLEOSOME INTERACTIONS                                                                                  | STRUCTURAL PROTEIN/DNA             |
| 1ID5 | CRYSTAL STRUCTURE OF BOVINE THROMBIN COMPLEX WITH PROTEASE INHIBITOR ECOTIN                                                                                                                               | HYDROLASE                          |
| 1IE7 | PHOSPHATE INHIBITED BACILLUS PASTEURII UREASE CRYSTAL STRUCTURE                                                                                                                                           | HYDROLASE                          |
| 1IEA | HISTOCOMPATIBILITY ANTIGEN                                                                                                                                                                                | HISTOCOMPATIBILITY ANTIGEN         |
| 1IEB | HISTOCOMPATIBILITY ANTIGEN                                                                                                                                                                                | HISTOCOMPATIBILITY ANTIGEN         |
| 1IGC | IGG1 FAB FRAGMENT (MOPC21) COMPLEX WITH DOMAIN III OF PROTEIN G FROM STREPTOCOCCUS                                                                                                                        | COMPLEX (ANTIBODY/BINDING PROTEIN) |
| 1IGF | CRYSTAL STRUCTURES OF AN ANTIBODY TO A PEPTIDE AND ITS COMPLEX WITH PEPTIDE ANTIGEN AT 2.8 ANGSTROMS                                                                                                      | IMMUNOGLOBULIN                     |
| 1IGI | 26-10 FAB:DIGOXIN COMPLEX-AFFINITY AND SPECIFICITY DUE TO SURFACE COMPLEMENTARITY                                                                                                                         | IMMUNOGLOBULIN                     |

|      |                                                                                                                                                                             |                                |
|------|-----------------------------------------------------------------------------------------------------------------------------------------------------------------------------|--------------------------------|
| 1IGJ | 26-10 FAB:DIGOXIN COMPLEX-AFFINITY AND SPECIFICITY DUE TO SURFACE COMPLEMENTARITY                                                                                           | IMMUNOGLOBULIN                 |
| 1IGT | STRUCTURE OF IMMUNOGLOBULIN                                                                                                                                                 | IMMUNOGLOBULIN                 |
| 1IGY | STRUCTURE OF IMMUNOGLOBULIN                                                                                                                                                 | IMMUNOGLOBULIN                 |
| 1IHF | INTEGRATION HOST FACTOR/DNA COMPLEX                                                                                                                                         | TRANSCRIPTION/DNA              |
| 1IHJ | CRYSTAL STRUCTURE OF THE N-TERMINAL PDZ DOMAIN OF INAD IN COMPLEX WITH A NORPA C-TERMINAL PEPTIDE                                                                           | SIGNALING PROTEIN              |
| 1IHS | CRYSTAL STRUCTURE OF THE COMPLEX OF HUMAN ALPHA-THROMBIN AND NON-HYDROLYZABLE BIFUNCTIONAL INHIBITORS, HIRUTONIN-2 AND HIRUTONIN-6                                          | HYDROLASE(SERINE PROTEINASE)   |
| 1IHT | CRYSTAL STRUCTURE OF THE COMPLEX OF HUMAN ALPHA-THROMBIN AND NON-HYDROLYZABLE BIFUNCTIONAL INHIBITORS, HIRUTONIN-2 AND HIRUTONIN-6                                          | HYDROLASE(SERINE PROTEINASE)   |
| 1II8 | CRYSTAL STRUCTURE OF THE P. FURIOSUS RAD50 ATPASE DOMAIN                                                                                                                    | REPLICATION                    |
| 1IIQ | CRYSTAL STRUCTURE OF HIV-1 PROTEASE COMPLEXED WITH A HYDROXYETHYLAMINE PEPTIDOMIMETIC INHIBITOR                                                                             | HYDROLASE, HYDROLASE INHIBITOR |
| 1IJD | CRYSTALLOGRAPHIC STRUCTURE OF THE LH3 COMPLEX FROM RHODOPSEUDOMONAS ACIDOPHILA STRAIN 7050                                                                                  | PHOTOSYNTHESIS                 |
| 1IJE | NUCLEOTIDE EXCHANGE INTERMEDIATES IN THE EEF1A-EEF1BA COMPLEX                                                                                                               | TRANSLATION                    |
| 1IJF | NUCLEOTIDE EXCHANGE MECHANISMS IN THE EEF1A-EEF1BA COMPLEX                                                                                                                  | TRANSLATION                    |
| 1IJK | THE VON WILLEBRAND FACTOR MUTANT (I546V) A1 DOMAIN-BOTROCETIN COMPLEX                                                                                                       | BLOOD CLOTTING/TOXIN           |
| 1IK9 | CRYSTAL STRUCTURE OF A XRCC4-DNA LIGASE IV COMPLEX                                                                                                                          | GENE REGULATION/LIGASE         |
| 1IKV | K103N MUTANT HIV-1 REVERSE TRANSCRIPTASE IN COMPLEX WITH EFIVARENZ                                                                                                          | TRANSFERASE                    |
| 1IKW | WILD TYPE HIV-1 REVERSE TRANSCRIPTASE IN COMPLEX WITH EFAVIRENZ                                                                                                             | TRANSFERASE                    |
| 1IKX | K103N MUTANT HIV-1 REVERSE TRANSCRIPTASE IN COMPLEX WITH THE INHIBITOR PNU142721                                                                                            | TRANSFERASE                    |
| 1IKY | HIV-1 REVERSE TRANSCRIPTASE IN COMPLEX WITH THE INHIBITOR MSC194                                                                                                            | TRANSFERASE                    |
| 1IL1 | CRYSTAL STRUCTURE OF G3-519, AN ANTI-HIV MONOCLONAL ANTIBODY                                                                                                                | IMMUNE SYSTEM                  |
| 1ILQ | CXCR-1 N-TERMINAL PEPTIDE BOUND TO INTERLEUKIN-8 (MINIMIZED MEAN)                                                                                                           | CYTOKINE                       |
| 1IM3 | CRYSTAL STRUCTURE OF THE HUMAN CYTOMEGALOVIRUS PROTEIN US2 BOUND TO THE MHC CLASS I MOLECULE HLA-A2/TAX                                                                     | VIRAL PROTEIN/IMMUNE SYSTEM    |
| 1IM9 | CRYSTAL STRUCTURE OF THE HUMAN NATURAL KILLER CELL INHIBITORY RECEPTOR KIR2DL1 BOUND TO ITS MHC LIGAND HLA-CW4                                                              | IMMUNE SYSTEM                  |
| 1IND | HOW THE ANTI-(METAL CHELATE) ANTIBODY CHA255 IS SPECIFIC FOR THE METAL ION OF ITS ANTIGEN: X-RAY STRUCTURES FOR TWO FAB(SLASH)HAPTEN COMPLEXES WITH DIFFERENT METALS IN THE | IMMUNOGLOBULIN                 |

| CHELATE |                                                                                                                                                                                                  |                                       |
|---------|--------------------------------------------------------------------------------------------------------------------------------------------------------------------------------------------------|---------------------------------------|
| 1INE    | HOW THE ANTI-(METAL CHELATE) ANTIBODY CHA255 IS SPECIFIC FOR THE METAL ION OF ITS ANTIGEN: X-RAY STRUCTURES FOR TWO FAB(SLASH)HAPTEN COMPLEXES WITH DIFFERENT METALS IN THE CHELATE              | IMMUNOGLOBULIN                        |
| 1INQ    | STRUCTURE OF MINOR HISTOCOMPATIBILITY ANTIGEN PEPTIDE, H13A, COMPLEXED TO H2-DB                                                                                                                  | IMMUNE SYSTEM                         |
| 1IO4    | CRYSTAL STRUCTURE OF RUNX-1/AML1/CBFALPHA RUNT DOMAIN-CBFBETA CORE DOMAIN HETERODIMER AND C/EBPBETA BZIP HOMODIMER BOUND TO A DNA FRAGMENT FROM THE CSF-1R PROMOTER                              | TRANSCRIPTION/DNA                     |
| 1IOD    | CRYSTAL STRUCTURE OF THE COMPLEX BETWEEN THE COAGULATION FACTOR X BINDING PROTEIN FROM SNAKE VENOM AND THE GLA DOMAIN OF FACTOR X                                                                | HYDROLASE/HYDROLASE INHIBITOR         |
| 1IOE    | HUMAN COAGULATION FACTOR XA IN COMPLEX WITH M55532                                                                                                                                               | HYDROLASE                             |
| 1IQ1    | CRYSTAL STRUCTURE OF THE IMPORTIN-ALPHA(44-54)-IMPORTIN-ALPHA(70-529) COMPLEX                                                                                                                    | PROTEIN TRANSPORT                     |
| 1IQ5    | CALMODULIN/NEMATODE CA2+/CALMODULIN DEPENDENT KINASE KINASE FRAGMENT                                                                                                                             | METAL BINDING PROTEIN/PROTEIN BINDING |
| 1IQD    | HUMAN FACTOR VIII C2 DOMAIN COMPLEXED TO HUMAN MONOCLONAL BO2C11 FAB.                                                                                                                            | IMMUNE SYSTEM/BLOOD CLOTTING          |
| 1IQE    | HUMAN COAGULATION FACTOR XA IN COMPLEX WITH M55590                                                                                                                                               | HYDROLASE                             |
| 1IQF    | HUMAN COAGULATION FACTOR XA IN COMPLEX WITH M55165                                                                                                                                               | HYDROLASE                             |
| 1IQG    | HUMAN COAGULATION FACTOR XA IN COMPLEX WITH M55159                                                                                                                                               | HYDROLASE                             |
| 1IQH    | HUMAN COAGULATION FACTOR XA IN COMPLEX WITH M55143                                                                                                                                               | HYDROLASE                             |
| 1IQI    | HUMAN COAGULATION FACTOR XA IN COMPLEX WITH M55125                                                                                                                                               | HYDROLASE                             |
| 1IQJ    | HUMAN COAGULATION FACTOR XA IN COMPLEX WITH M55124                                                                                                                                               | HYDROLASE                             |
| 1IQK    | HUMAN COAGULATION FACTOR XA IN COMPLEX WITH M55113                                                                                                                                               | HYDROLASE                             |
| 1IQL    | HUMAN COAGULATION FACTOR XA IN COMPLEX WITH M54476                                                                                                                                               | HYDROLASE                             |
| 1IQM    | HUMAN COAGULATION FACTOR XA IN COMPLEX WITH M54471                                                                                                                                               | HYDROLASE                             |
| 1IQN    | HUMAN COAGULATION FACTOR XA IN COMPLEX WITH M55192                                                                                                                                               | HYDROLASE                             |
| 1IQW    | CRYSTAL STRUCTURE OF THE FAB FRAGMENT OF THE MOUSE ANTI-HUMAN FAS ANTIBODY HFE7A                                                                                                                 | IMMUNE SYSTEM                         |
| 1IR1    | CRYSTAL STRUCTURE OF SPINACH RIBULOSE-1,5-BISPHOSPHATE CARBOXYLASE/OXYGENASE (RUBISCO) COMPLEXED WITH CO2, MG2+ AND 2-CARBOXYARABINITOL-1,5-BISPHOSPHATE                                         | LYASE                                 |
| 1IR2    | CRYSTAL STRUCTURE OF ACTIVATED RIBULOSE-1,5-BISPHOSPHATE CARBOXYLASE/OXYGENASE (RUBISCO) FROM GREEN ALGA, CHLAMYDOMONAS REINHARDTII COMPLEXED WITH 2-CARBOXYARABINITOL-1,5-BISPHOSPHATE (2-CABP) | LYASE                                 |
| 1IR3    | PHOSPHORYLATED INSULIN RECEPTOR TYROSINE KINASE IN COMPLEX WITH PEPTIDE SUBSTRATE AND ATP ANALOG                                                                                                 | COMPLEX (TRANSFERASE/SUBSTRATE)       |
| 1IRD    | CRYSTAL STRUCTURE OF HUMAN CARBONMONOXY-HAEMOGLOBIN AT 1.25                                                                                                                                      | OXYGEN STORAGE/TRANSPORT              |

## A RESOLUTION

|      |                                                                                                                                                        |                                       |
|------|--------------------------------------------------------------------------------------------------------------------------------------------------------|---------------------------------------|
| 1IRE | CRYSTAL STRUCTURE OF CO-TYPE NITRILE HYDRATASE FROM PSEUDONOCARDIA THERMOPHILA                                                                         | LYASE                                 |
| 1IRS | IRS-1 PTB DOMAIN COMPLEXED WITH A IL-4 RECEPTOR PHOSPHOPEPTIDE, NMR, MINIMIZED AVERAGE STRUCTURE                                                       | COMPLEX (SIGNAL TRANSDUCTION/PEPTIDE) |
| 1IRU | CRYSTAL STRUCTURE OF THE MAMMALIAN 20S PROTEASOME AT 2.75 Å RESOLUTION                                                                                 | HYDROLASE                             |
| 1IS0 | CRYSTAL STRUCTURE OF A COMPLEX OF THE SRC SH2 DOMAIN WITH CONFORMATIONALLY CONSTRAINED PEPTIDE INHIBITOR                                               | TRANSFERASE                           |
| 1IS7 | CRYSTAL STRUCTURE OF RAT GTPCHI/GFRP STIMULATORY COMPLEX                                                                                               | HYDROLASE/PROTEIN BINDING             |
| 1IS8 | CRYSTAL STRUCTURE OF RAT GTPCHI/GFRP STIMULATORY COMPLEX PLUS ZN                                                                                       | HYDROLASE/PROTEIN BINDING             |
| 1ISQ | PYROCOCOCCUS FURIOSUS PCNA COMPLEXED WITH RFCL PIP-BOX PEPTIDE                                                                                         | DNA BINDING PROTEIN                   |
| 1IVO | CRYSTAL STRUCTURE OF THE COMPLEX OF HUMAN EPIDERMAL GROWTH FACTOR AND RECEPTOR EXTRACELLULAR DOMAINS.                                                  | TRANSFERASE/SIGNALING PROTEIN         |
| 1IVP | THE CRYSTALLOGRAPHIC STRUCTURE OF THE PROTEASE FROM HUMAN IMMUNODEFICIENCY VIRUS TYPE 2 WITH TWO SYNTHETIC PEPTIDIC TRANSITION STATE ANALOG INHIBITORS | HYDROLASE(ACID PROTEINASE)            |
| 1IVQ | THE CRYSTALLOGRAPHIC STRUCTURE OF THE PROTEASE FROM HUMAN IMMUNODEFICIENCY VIRUS TYPE 2 WITH TWO SYNTHETIC PEPTIDIC TRANSITION STATE ANALOG INHIBITORS | HYDROLASE(ACID PROTEINASE)            |
| 1IW7 | CRYSTAL STRUCTURE OF THE RNA POLYMERASE HOLOENZYME FROM THERMUS THERMOPHILUS AT 2.6Å RESOLUTION                                                        | TRANSFERASE                           |
| 1IWA | RUBISCO FROM GALDIERIA PARTITA                                                                                                                         | LYASE                                 |
| 1IWB | CRYSTAL STRUCTURE OF DIOL DEHYDRATASE                                                                                                                  | LYASE                                 |
| 1IWH | CRYSTAL STRUCTURE OF HORSE CARBONMONOXYHEMOGLOBIN-BEZAFIBRATE COMPLEX AT 1.55Å RESOLUTION: A NOVEL ALLOSTERIC BINDING SITE IN R-STATE HEMOGLOBIN       | OXYGEN STORAGE/TRANSPORT              |
| 1IWP | GLYCEROL DEHYDRATASE-CYANOCOBALAMIN COMPLEX OF KLEBSIELLA PNEUMONIAE                                                                                   | LYASE                                 |
| 1IWQ | CRYSTAL STRUCTURE OF MARCKS CALMODULIN BINDING DOMAIN PEPTIDE COMPLEXED WITH CA <sup>2+</sup> /CALMODULIN                                              | METAL BINDING PROTEIN/PROTEIN BINDING |
| 1IXR | RUVA-RUVB COMPLEX                                                                                                                                      | HYDROLASE                             |
| 1IXS | STRUCTURE OF RUVB COMPLEXED WITH RUVA DOMAIN III                                                                                                       | HYDROLASE                             |
| 1IXX | CRYSTAL STRUCTURE OF COAGULATION FACTORS IX/X-BINDING PROTEIN (IX/X-BP) FROM VENOM OF HABU SNAKE WITH A HETERODIMER OF C-TYPE LECTIN DOMAINS           | COAGULATION FACTOR BINDING            |
| 1IYJ | STRUCTURE OF A BRCA2-DSS1 COMPLEX                                                                                                                      | GENE REGULATION/ANTITUMOR PROTEIN     |
| 1IZA | ROLE OF B13 GLU IN INSULIN ASSEMBLY: THE HEXAMER STRUCTURE OF RECOMBINANT MUTANT (B13 GLU-> GLN) INSULIN                                               | HORMONE                               |
| 1IZB | ROLE OF B13 GLU IN INSULIN ASSEMBLY: THE HEXAMER STRUCTURE OF RECOMBINANT MUTANT (B13 GLU-> GLN) INSULIN                                               | HORMONE                               |

|      |                                                                                                                                                                       |                                |
|------|-----------------------------------------------------------------------------------------------------------------------------------------------------------------------|--------------------------------|
| 1HZL | CRYSTAL STRUCTURE OF PHOTOSYSTEM II                                                                                                                                   | PHOTOSYNTHESIS                 |
| 1HZN | CRYSTAL STRUCTURE OF ACTIN FILAMENT CAPPING PROTEIN CAPZ                                                                                                              | PROTEIN BINDING                |
| 1J19 | CRYSTAL STRUCTURE OF THE RADXIN FERM DOMAIN COMPLEXED WITH THE ICAM-2 CYTOPLASMIC PEPTIDE                                                                             | CELL ADHESION                  |
| 1J1D | CRYSTAL STRUCTURE OF THE 46KDA DOMAIN OF HUMAN CARDIAC TROPONIN IN THE CA <sup>2+</sup> SATURATED FORM                                                                | CONTRACTILE PROTEIN            |
| 1J1E | CRYSTAL STRUCTURE OF THE 52KDA DOMAIN OF HUMAN CARDIAC TROPONIN IN THE CA <sup>2+</sup> SATURATED FORM                                                                | CONTRACTILE PROTEIN            |
| 1J1O | CRYSTAL STRUCTURE OF HYHEL-10 FV MUTANT LY50F COMPLEXED WITH HEN EGG WHITE LYSOZYME                                                                                   | IMMUNE SYSTEM/HYDROLASE        |
| 1J1P | CRYSTAL STRUCTURE OF HYHEL-10 FV MUTANT LS91A COMPLEXED WITH HEN EGG WHITE LYSOZYME                                                                                   | IMMUNE SYSTEM/HYDROLASE        |
| 1J1X | CRYSTAL STRUCTURE OF HYHEL-10 FV MUTANT LS93A COMPLEXED WITH HEN EGG WHITE LYSOZYME                                                                                   | IMMUNE SYSTEM/HYDROLASE        |
| 1J2J | CRYSTAL STRUCTURE OF GGA1 GAT N-TERMINAL REGION IN COMPLEX WITH ARF1 GTP FORM                                                                                         | PROTEIN TRANSPORT              |
| 1J2X | CRYSTAL STRUCTURE OF RAP74 C-TERMINAL DOMAIN COMPLEXED WITH FCP1 C-TERMINAL PEPTIDE                                                                                   | TRANSCRIPTION                  |
| 1J34 | CRYSTAL STRUCTURE OF MG(II)-AND CA(II)-BOUND GLA DOMAIN OF FACTOR IX COMPLEXED WITH BINDING PROTEIN                                                                   | PROTEIN BINDING/BLOOD CLOTTING |
| 1J35 | CRYSTAL STRUCTURE OF CA(II)-BOUND GLA DOMAIN OF FACTOR IX COMPLEXED WITH BINDING PROTEIN                                                                              | PROTEIN BINDING/BLOOD CLOTTING |
| 1J3I | WILD-TYPE PLASMODIUM FALCIPARUM DIHYDROFOLATE REDUCTASE-THYMIDYLATE SYNTHASE (PFDHFR-TS) COMPLEXED WITH WR99210, NADPH, AND DUMP                                      | OXIDOREDUCTASE, TRANSFERASE    |
| 1J3J | DOUBLE MUTANT (C59R+S108N) PLASMODIUM FALCIPARUM DIHYDROFOLATE REDUCTASE-THYMIDYLATE SYNTHASE (PFDHFR-TS) COMPLEXED WITH PYRIMETHAMINE, NADPH, AND DUMP               | OXIDOREDUCTASE, TRANSFERASE    |
| 1J3K | QUADRUPLE MUTANT (N51I+C59R+S108N+I164L) PLASMODIUM FALCIPARUM DIHYDROFOLATE REDUCTASE-THYMIDYLATE SYNTHASE (PFDHFR-TS) COMPLEXED WITH WR99210, NADPH, AND DUMP       | OXIDOREDUCTASE, TRANSFERASE    |
| 1J3Y | DIRECT OBSERVATION OF PHOTOLYSIS-INDUCED TERTIARY STRUCTURAL CHANGES IN HUMAN HEMOGLOBIN; CRYSTAL STRUCTURE OF ALPHA(Fe)-BETA(Ni) HEMOGLOBIN (LASER PHOTOLYSED)       | OXYGEN STORAGE/TRANSPORT       |
| 1J3Z | DIRECT OBSERVATION OF PHOTOLYSIS-INDUCED TERTIARY STRUCTURAL CHANGES IN HUMAN HAEMOGLOBIN; CRYSTAL STRUCTURE OF ALPHA(Fe-CO)-BETA(Ni) HEMOGLOBIN (LASER UNPHOTOLYSED) | OXYGEN STORAGE/TRANSPORT       |
| 1J40 | DIRECT OBSERVATION OF PHOTOLYSIS-INDUCED TERTIARY STRUCTURAL CHANGES IN HUMAN HAEMOGLOBIN; CRYSTAL STRUCTURE OF ALPHA(Ni)-BETA(Fe-CO) HEMOGLOBIN (LASER UNPHOTOLYSED) | OXYGEN STORAGE/TRANSPORT       |
| 1J41 | DIRECT OBSERVATION OF PHOTOLYSIS-INDUCED TERTIARY STRUCTURAL CHANGES IN HUMAN HAEMOGLOBIN; CRYSTAL STRUCTURE OF ALPHA(Ni)-BETA(Fe) HEMOGLOBIN (LASER PHOTOLYSED)      | OXYGEN STORAGE/TRANSPORT       |
| 1J4X | HUMAN VH1-RELATED DUAL-SPECIFICITY PHOSPHATASE C124S MUTANT-PEPTIDE COMPLEX                                                                                           | HYDROLASE                      |

|       |                                                                                                                                        |                                     |
|-------|----------------------------------------------------------------------------------------------------------------------------------------|-------------------------------------|
| 1J5E  | STRUCTURE OF THE THERMUS THERMOPHILUS 30S RIBOSOMAL SUBUNIT                                                                            | RIBOSOME                            |
| 1J5O  | CRYSTAL STRUCTURE OF MET184ILE MUTANT OF HIV-1 REVERSE TRANSCRIPTASE IN COMPLEX WITH DOUBLE STRANDED DNA TEMPLATE-PRIMER               | TRANSFERASE/IMMUNE SYSTEM/DNA       |
| 1J73  | CRYSTAL STRUCTURE OF AN UNSTABLE INSULIN ANALOG WITH NATIVE ACTIVITY.                                                                  | HORMONE/GROWTH FACTOR               |
| 1J7D  | CRYSTAL STRUCTURE OF HMMS2-HUBC13                                                                                                      | UNKNOWN FUNCTION                    |
| 1J7S  | CRYSTAL STRUCTURE OF DEOXY HBALPHAYQ, A MUTANT OF HBA                                                                                  | OXYGEN STORAGE/TRANSPORT            |
| 1J7V  | HUMAN IL-10 / IL-10R1 COMPLEX                                                                                                          | CYTOKINE/RECEPTOR                   |
| 1J7W  | CRYSTAL STRUCTURE OF DEOXY HBBETAYQ, A SITE DIRECTED MUTANT OF HBA                                                                     | OXYGEN STORAGE/TRANSPORT            |
| 1J7Y  | CRYSTAL STRUCTURE OF PARTIALLY LIGATED MUTANT OF HBA                                                                                   | OXYGEN STORAGE/TRANSPORT            |
| 1J7Z  | OSMOLYTE STABILIZATION OF RIBONUCLEASE                                                                                                 | HYDROLASE                           |
| 1J80  | OSMOLYTE STABILIZATION OF RNASE                                                                                                        | HYDROLASE                           |
| 1J81  | OSMOLYTE STABILIZATION OF RNASE                                                                                                        | HYDROLASE                           |
| 1J82  | OSMOLYTE STABILIZATION OF RNASE                                                                                                        | HYDROLASE                           |
| 1J8H  | CRYSTAL STRUCTURE OF A COMPLEX OF A HUMAN ALPHA/BETA-T CELL RECEPTOR, INFLUENZA HA ANTIGEN PEPTIDE, AND MHC CLASS II MOLECULE, HLA-DR4 | IMMUNE SYSTEM                       |
| 1J9C  | CRYSTAL STRUCTURE OF TISSUE FACTOR-FACTOR VIIIA COMPLEX                                                                                | BLOOD CLOTTING                      |
| 1-Jan | COMPLEX OF PRO-LEU-GLY-HYDROXYLAMINE WITH THE CATALYTIC DOMAIN OF MATRIX METALLO PROTEINASE-8 (PHE79 FORM)                             | COMPLEX (METALLOPROTEASE/INHIBITOR) |
| 1JAP  | COMPLEX OF PRO-LEU-GLY-HYDROXYLAMINE WITH THE CATALYTIC DOMAIN OF MATRIX METALLO PROTEINASE-8 (MET80 FORM)                             | COMPLEX (METALLOPROTEASE/INHIBITOR) |
| 1JAT  | MMS2/UBC13 UBIQUITIN CONJUGATING ENZYME COMPLEX                                                                                        | LIGASE                              |
| 1JB0  | CRYSTAL STRUCTURE OF PHOTOSYSTEM I: A PHOTOSYNTHETIC REACTION CENTER AND CORE ANTENNA SYSTEM FROM CYANOBACTERIA                        | PHOTOSYNTHESIS                      |
| 1JB7  | DNA G-QUARTETS IN A 1.86 Å RESOLUTION STRUCTURE OF AN OXYTRICHA NOVA TELOMERIC PROTEIN-DNA COMPLEX                                     | DNA-BINDING PROTEIN/DNA             |
| 1JBO  | THE 1.45 Å THREE-DIMENSIONAL STRUCTURE OF C-PHYCOCYANIN FROM THE THERMOPHYLIC CYANOBACTERIUM SYNECHOCOCCUS ELONGATUS                   | PHOTOSYNTHESIS                      |
| 1JBP  | CRYSTAL STRUCTURE OF THE CATALYTIC SUBUNIT OF CAMP-DEPENDENT PROTEIN KINASE COMPLEXED WITH A SUBSTRATE PEPTIDE, ADP AND DETERGENT      | TRANSFERASE                         |
| 1JBU  | COAGULATION FACTOR VII ZYMOGEN (EGF2/PROTEASE) IN COMPLEX WITH INHIBITORY EXOSITE PEPTIDE A-183                                        | HYDROLASE                           |
| 1JCA  | NON-STANDARD DESIGN OF UNSTABLE INSULIN ANALOGUES WITH ENHANCED ACTIVITY                                                               | HORMONE/GROWTH FACTOR               |
| 1JCH  | CRYSTAL STRUCTURE OF COLICIN E3 IN COMPLEX WITH ITS IMMUNITY PROTEIN                                                                   | RIBOSOME INHIBITOR, HYDROLASE       |
| 1JCQ  | CRYSTAL STRUCTURE OF HUMAN PROTEIN FARNESYLTRANSFERASE                                                                                 | TRANSFERASE                         |

| COMPLEXED WITH FARNESYL DIPHOSPHATE AND THE PEPTIDOMIMETIC INHIBITOR L-739,750 |                                                                                                                                                      |                                     |
|--------------------------------------------------------------------------------|------------------------------------------------------------------------------------------------------------------------------------------------------|-------------------------------------|
| 1JCR                                                                           | CRYSTAL STRUCTURE OF RAT PROTEIN FARNESYLTRANSFERASE COMPLEXED WITH THE NON-SUBSTRATE TETRAPEPTIDE INHIBITOR CVFM AND FARNESYL DIPHOSPHATE SUBSTRATE | TRANSFERASE                         |
| 1JCS                                                                           | CRYSTAL STRUCTURE OF RAT PROTEIN FARNESYLTRANSFERASE COMPLEXED WITH THE PEPTIDE SUBSTRATE TKCVFM AND AN ANALOG OF FARNESYL DIPHOSPHATE               | TRANSFERASE                         |
| 1JD2                                                                           | CRYSTAL STRUCTURE OF THE YEAST 20S PROTEASOME:TMC-95A COMPLEX: A NON-COVALENT PROTEASOME INHIBITOR                                                   | HYDROLASE                           |
| 1JD5                                                                           | CRYSTAL STRUCTURE OF DIAP1-BIR2/GRIM                                                                                                                 | APOPTOSIS                           |
| 1JD6                                                                           | CRYSTAL STRUCTURE OF DIAP1-BIR2/HID COMPLEX                                                                                                          | APOPTOSIS                           |
| 1JDB                                                                           | CARBAMOYL PHOSPHATE SYNTHETASE FROM ESCHERICHIA COLI                                                                                                 | LIGASE                              |
| 1JDH                                                                           | CRYSTAL STRUCTURE OF BETA-CATENIN AND HTCF-4                                                                                                         | TRANSCRIPTION                       |
| 1JDP                                                                           | CRYSTAL STRUCTURE OF HORMONE/RECEPTOR COMPLEX                                                                                                        | SIGNALING PROTEIN                   |
| 1JEB                                                                           | HIMERIC HUMAN/MOUSE CARBONMONOXY HEMOGLOBIN (HUMAN ZETA2 / MOUSE BETA2)                                                                              | OXYGEN STORAGE/TRANSPORT            |
| 1JEK                                                                           | VISNA TM CORE STRUCTURE                                                                                                                              | VIRAL PROTEIN                       |
| 1JEN                                                                           | HUMAN S-ADENOSYLMETHIONINE DECARBOXYLASE                                                                                                             | S-ADENOSYLMETHIONINE DECARBOXYLASE  |
| 1JEQ                                                                           | CRYSTAL STRUCTURE OF THE KU HETERODIMER                                                                                                              | DNA BINDING PROTEIN                 |
| 1JET                                                                           | OLIGO-PEPTIDE BINDING PROTEIN (OPPA) COMPLEXED WITH KAK                                                                                              | COMPLEX (PEPTIDE TRANSPORT/PEPTIDE) |
| 1JEU                                                                           | OLIGO-PEPTIDE BINDING PROTEIN (OPPA) COMPLEXED WITH KEK                                                                                              | COMPLEX (PEPTIDE TRANSPORT/PEPTIDE) |
| 1JEV                                                                           | OLIGO-PEPTIDE BINDING PROTEIN (OPPA) COMPLEXED WITH KWK                                                                                              | COMPLEX (PEPTIDE TRANSPORT/PEPTIDE) |
| 1JEY                                                                           | CRYSTAL STRUCTURE OF THE KU HETERODIMER BOUND TO DNA                                                                                                 | DNA BINDING PROTEIN/DNA             |
| 1JF1                                                                           | CRYSTAL STRUCTURE OF HLA-A2*0201 IN COMPLEX WITH A DECAMERIC ALTERED PEPTIDE LIGAND FROM THE MART-1/MELAN-A                                          | IMMUNE SYSTEM                       |
| 1JFF                                                                           | REFINED STRUCTURE OF ALPHA-BETA TUBULIN FROM ZINC-INDUCED SHEETS STABILIZED WITH TAXOL                                                               | STRUCTURAL PROTEIN                  |
| 1JFI                                                                           | CRYSTAL STRUCTURE OF THE NC2-TBP-DNA TERNARY COMPLEX                                                                                                 | TRANSCRIPTION/DNA                   |
| 1JFQ                                                                           | ANTIGEN-BINDING FRAGMENT OF THE MURINE ANTI-PHENYLARSONATE ANTIBODY 36-71, "FAB 36-71"                                                               | IMMUNE SYSTEM                       |
| 1JG3                                                                           | CRYSTAL STRUCTURE OF L-ISOASPARTYL (D-ASPARTYL) O-METHYLTRANSFERASE WITH ADENOSINE & VYP(ISP)HA SUBSTRATE                                            | TRANSFERASE                         |
| 1JGD                                                                           | HLA-B*2709 BOUND TO DECA-PEPTIDE S10R                                                                                                                | IMMUNE SYSTEM                       |
| 1JGE                                                                           | HLA-B*2705 BOUND TO NONA-PEPTIDE M9                                                                                                                  | IMMUNE SYSTEM                       |
| 1JGL                                                                           | CRYSTAL STRUCTURE OF IMMUNOGLOBULIN FAB FRAGMENT COMPLEXED WITH 17-BETA-ESTRADIOL                                                                    | IMMUNE SYSTEM                       |
| 1JGU                                                                           | STRUCTURAL BASIS FOR DISFAVORED ELIMINATION REACTION IN CATALYTIC ANTIBODY 1D4                                                                       | IMMUNE SYSTEM                       |

|      |                                                                                                                                         |                              |
|------|-----------------------------------------------------------------------------------------------------------------------------------------|------------------------------|
| 1JGV | STRUCTURAL BASIS FOR DISFAVORED ELIMINATION REACTION IN CATALYTIC ANTIBODY 1D4                                                          | IMMUNE SYSTEM                |
| 1JGW | PHOTOSYNTHETIC REACTION CENTER MUTANT WITH THR M 21 REPLACED WITH LEU                                                                   | PHOTOSYNTHESIS               |
| 1JGX | PHOTOSYNTHETIC REACTION CENTER MUTANT WITH THR M 21 REPLACED WITH ASP                                                                   | PHOTOSYNTHESIS               |
| 1JGY | PHOTOSYNTHETIC REACTION CENTER MUTANT WITH TYR M 76 REPLACED WITH PHE                                                                   | PHOTOSYNTHESIS               |
| 1JGZ | PHOTOSYNTHETIC REACTION CENTER MUTANT WITH TYR M 76 REPLACED WITH LYS                                                                   | PHOTOSYNTHESIS               |
| 1JH0 | PHOTOSYNTHETIC REACTION CENTER MUTANT WITH GLU L 205 REPLACED TO LEU                                                                    | PHOTOSYNTHESIS               |
| 1JHK | CRYSTAL STRUCTURE OF THE ANTI-ESTRADIOL ANTIBODY 57-2                                                                                   | IMMUNE SYSTEM                |
| 1JHL | THREE-DIMENSIONAL STRUCTURE OF A HETEROCLITIC ANTIGEN-ANTIBODY CROSS-REACTION COMPLEX                                                   | COMPLEX(ANTIBODY-ANTIGEN)    |
| 1JHT | CRYSTAL STRUCTURE OF HLA-A2*0201 IN COMPLEX WITH A NONAMERIC ALTERED PEPTIDE LIGAND (ALGIGILTV) FROM THE MART-1/MELAN-A.                | IMMUNE SYSTEM                |
| 1JIW | CRYSTAL STRUCTURE OF THE APR-APRIN COMPLEX                                                                                              | HYDROLASE/HYROLASE INHIBITOR |
| 1JJ2 | FULLY REFINED CRYSTAL STRUCTURE OF THE HALOARCUA MARISMORTUI LARGE RIBOSOMAL SUBUNIT AT 2.4 ANGSTROM RESOLUTION                         | RIBOSOME                     |
| 1JJC | CRYSTAL STRUCTURE AT 2.6A RESOLUTION OF PHENYLALANYL-TRNA SYNTHETASE COMPLEXED WITH PHENYLALANYL-ADENYLATE IN THE PRESENCE OF MANGANESE | LIGASE                       |
| 1JJO | CRYSTAL STRUCTURE OF MOUSE NEUROSERPIN (CLEAVED FORM)                                                                                   | SIGNALING PROTEIN            |
| 1JJU | STRUCTURE OF A QUINOHEMOPROTEIN AMINE DEHYDROGENASE WITH A UNIQUE REDOX COFACTOR AND HIGHLY UNUSUAL CROSSLINKING                        | ELECTRON TRANSPORT PROTEIN   |
| 1JK0 | RIBONUCLEOTIDE REDUCTASE Y2Y4 HETERODIMER                                                                                               | OXIDOREDUCTASE               |
| 1JK4 | DES 1-6 BOVINE NEUROPHYSIN II COMPLEX WITH VASOPRESSIN                                                                                  | NEUROPEPTIDE                 |
| 1JK8 | CRYSTAL STRUCTURE OF A HUMAN INSULIN PEPTIDE-HLA-DQ8 COMPLEX                                                                            | IMMUNE SYSTEM                |
| 1JK9 | HETERODIMER BETWEEN H48F-YSD1 AND YCCS                                                                                                  | OXIDOREDUCTASE               |
| 1JKG | STRUCTURAL BASIS FOR THE RECOGNITION OF A NUCLEOPORIN FG-REPEAT BY THE NTF2-LIKE DOMAIN OF TAP-P15 MRNA NUCLEAR EXPORT FACTOR           | TRANSPORT PROTEIN            |
| 1JKH | CRYSTAL STRUCTURE OF Y181C MUTANT HIV-1 REVERSE TRANSCRIPTASE IN COMPLEX WITH DMP-266(EFAVIRENZ)                                        | TRANSFERASE                  |
| 1JKJ | E. COLI SCS                                                                                                                             | LIGASE                       |
| 1JKY | CRYSTAL STRUCTURE OF THE ANTHRAX LETHAL FACTOR (LF): WILD-TYPE LF COMPLEXED WITH THE N-TERMINAL SEQUENCE OF MAPKK2                      | TOXIN                        |
| 1JL4 | CRYSTAL STRUCTURE OF THE HUMAN CD4 N-TERMINAL TWO DOMAIN FRAGMENT COMPLEXED TO A CLASS II MHC MOLECULE                                  | IMMUNE SYSTEM                |



|      |                                                                                                                                             |                     |
|------|---------------------------------------------------------------------------------------------------------------------------------------------|---------------------|
| 1JLA | CRYSTAL STRUCTURE OF Y181C MUTANT HIV-1 REVERSE TRANSCRIPTASE IN COMPLEX WITH TNK-651                                                       | TRANSFERASE         |
| 1JLB | CRYSTAL STRUCTURE OF Y181C MUTANT HIV-1 REVERSE TRANSCRIPTASE IN COMPLEX WITH NEVIRAPINE                                                    | TRANSFERASE         |
| 1JLC | CRYSTAL STRUCTURE OF Y181C MUTANT HIV-1 REVERSE TRANSCRIPTASE IN COMPLEX WITH PETT-2                                                        | TRANSFERASE         |
| 1JLE | CRYSTAL STRUCTURE OF Y188C MUTANT HIV-1 REVERSE TRANSCRIPTASE                                                                               | TRANSFERASE         |
| 1JLF | CRYSTAL STRUCTURE OF Y188C MUTANT HIV-1 REVERSE TRANSCRIPTASE IN COMPLEX WITH NEVIRAPINE                                                    | TRANSFERASE         |
| 1JLG | CRYSTAL STRUCTURE OF Y188C MUTANT HIV-1 REVERSE TRANSCRIPTASE IN COMPLEX WITH UC-781                                                        | TRANSFERASE         |
| 1JLL | CRYSTAL STRUCTURE ANALYSIS OF THE E197BETAA MUTANT OF E. COLI SCS                                                                           | LIGASE              |
| 1JLQ | CRYSTAL STRUCTURE OF HIV-1 REVERSE TRANSCRIPTASE IN COMPLEX WITH 739W94                                                                     | TRANSFERASE         |
| 1JLT | VIPOXIN COMPLEX                                                                                                                             | HYDROLASE           |
| 1JLU | CRYSTAL STRUCTURE OF THE CATALYTIC SUBUNIT OF CAMP-DEPENDENT PROTEIN KINASE COMPLEXED WITH A PHOSPHORYLATED SUBSTRATE PEPTIDE AND DETERGENT | TRANSFERASE         |
| 1JMA | CRYSTAL STRUCTURE OF THE HERPES SIMPLEX VIRUS GLYCOPROTEIN D BOUND TO THE CELLULAR RECEPTOR HVEA/HVEM                                       | VIRAL PROTEIN       |
| 1JMO | CRYSTAL STRUCTURE OF THE HEPARIN COFACTOR II-S195A THROMBIN COMPLEX                                                                         | BLOOD CLOTTING      |
| 1JMT | X-RAY STRUCTURE OF A CORE U2AF65/U2AF35 HETERODIMER                                                                                         | RNA BINDING PROTEIN |
| 1JMU | CRYSTAL STRUCTURE OF THE REOVIRUS MU1/SIGMA3 COMPLEX                                                                                        | VIRAL PROTEIN       |
| 1JMX | CRYSTAL STRUCTURE OF A QUINOHEMOPROTEIN AMINE DEHYDROGENASE FROM PSEUDOMONAS PUTIDA                                                         | OXIDOREDUCTASE      |
| 1JMZ | CRYSTAL STRUCTURE OF A QUINOHEMOPROTEIN AMINE DEHYDROGENASE FROM PSEUDOMONAS PUTIDA WITH INHIBITOR                                          | OXIDOREDUCTASE      |
| 1JN5 | STRUCTURAL BASIS FOR THE RECOGNITION OF A NUCLEOPORIN FG-REPEAT BY THE NTF2-LIKE DOMAIN OF TAP-P15 MRNA EXPORT FACTOR                       | TRANSPORT PROTEIN   |
| 1JN6 | CRYSTAL STRUCTURE OF FAB-ESTRADIOL COMPLEXES                                                                                                | IMMUNE SYSTEM       |
| 1JN9 | STRUCTURE OF PUTATIVE ASPARAGINASE ENCODED BY ESCHERICHIA COLI YBIK GENE                                                                    | HYDROLASE           |
| 1JNH | CRYSTAL STRUCTURE OF FAB-ESTRADIOL COMPLEXES                                                                                                | IMMUNE SYSTEM       |
| 1JNL | CRYSTAL STRUCTURE OF FAB-ESTRADIOL COMPLEXES                                                                                                | IMMUNE SYSTEM       |
| 1JNN | CRYSTAL STRUCTURE OF FAB-ESTRADIOL COMPLEXES                                                                                                | IMMUNE SYSTEM       |
| 1JNR | STRUCTURE OF ADENYLYLSULFATE REDUCTASE FROM THE HYPERTHERMOPHILIC ARCHAEoglobus FULGIDUS AT 1.6 RESOLUTION                                  | OXIDOREDUCTASE      |
| 1JNZ | STRUCTURE OF ADENYLYLSULFATE REDUCTASE FROM THE                                                                                             | OXIDOREDUCTASE      |

## HYPERTHERMOPHILIC ARCHAEoglobus fulgidus AT 1.6 RESOLUTION

|      |                                                                                                                                                                                                                    |                             |
|------|--------------------------------------------------------------------------------------------------------------------------------------------------------------------------------------------------------------------|-----------------------------|
| 1JOU | CRYSTAL STRUCTURE OF NATIVE S195A THROMBIN WITH AN UNOCCUPIED ACTIVE SITE                                                                                                                                          | BLOOD CLOTTING              |
| 1JOW | CRYSTAL STRUCTURE OF A COMPLEX OF HUMAN CDK6 AND A VIRAL CYCLIN                                                                                                                                                    | CELL CYCLE/TRANSFERASE      |
| 1JPF | CRYSTAL STRUCTURE OF THE LCMV PEPTIDIC EPITOPE GP276 IN COMPLEX WITH THE MURINE CLASS I MHC MOLECULE H-2DB                                                                                                         | IMMUNE SYSTEM               |
| 1JPG | CRYSTAL STRUCTURE OF THE LCMV PEPTIDIC EPITOPE NP396 IN COMPLEX WITH THE MURINE CLASS I MHC MOLECULE H-2DB                                                                                                         | IMMUNE SYSTEM               |
| 1JPL | GGA3 VHS DOMAIN COMPLEXED WITH C-TERMINAL PEPTIDE FROM CATION-INDEPENDENT MANNOSE 6-PHOSPHATE RECEPTOR                                                                                                             | SIGNALING PROTEIN           |
| 1JPP | THE STRUCTURE OF A BETA-CATENIN BINDING REPEAT FROM ADENOMATOUS POLYPOSIS COLI (APC) IN COMPLEX WITH BETA-CATENIN                                                                                                  | CELL ADHESION               |
| 1JPS | CRYSTAL STRUCTURE OF TISSUE FACTOR IN COMPLEX WITH HUMANIZED FAB D3H44                                                                                                                                             | IMMUNE SYSTEM               |
| 1JPW | CRYSTAL STRUCTURE OF A HUMAN TCF-4 / BETA-CATENIN COMPLEX                                                                                                                                                          | CELL ADHESION               |
| 1JQ7 | HCMV PROTEASE DIMER-INTERFACE MUTANT, S225Y COMPLEXED TO INHIBITOR BILC 408                                                                                                                                        | HYDROLASE                   |
| 1JQ8 | DESIGN OF SPECIFIC INHIBITORS OF PHOSPHOLIPASE A2: CRYSTAL STRUCTURE OF A COMPLEX FORMED BETWEEN PHOSPHOLIPASE A2 FROM DABOIA RUSSELLI PULCHELLA AND A DESIGNED PENTAPEPTIDE LEU-ALA-ILE-TYR-SER AT 2.0 RESOLUTION | HYDROLASE                   |
| 1JQ9 | CRYSTAL STRUCTURE OF A COMPLEX FORMED BETWEEN PHOSPHOLIPASE A2 FROM DABOIA RUSSELLI PULCHELLA AND A DESIGNED PENTAPEPTIDE PHE-LEU-SER-TYR-LYS AT 1.8 RESOLUTION                                                    | HYDROLASE                   |
| 1JQJ | MECHANISM OF PROCESSIVITY CLAMP OPENING BY THE DELTA SUBUNIT WRENCH OF THE CLAMP LOADER COMPLEX OF E. COLI DNA POLYMERASE III: STRUCTURE OF THE BETA-DELTA COMPLEX                                                 | TRANSFERASE                 |
| 1JQL | MECHANISM OF PROCESSIVITY CLAMP OPENING BY THE DELTA SUBUNIT WRENCH OF THE CLAMP LOADER COMPLEX OF E. COLI DNA POLYMERASE III: STRUCTURE OF BETA-DELTA (1-140)                                                     | TRANSFERASE                 |
| 1JR3 | CRYSTAL STRUCTURE OF THE PROCESSIVITY CLAMP LOADER GAMMA COMPLEX OF E. COLI DNA POLYMERASE III                                                                                                                     | TRANSFERASE                 |
| 1JRO | CRYSTAL STRUCTURE OF XANTHINE DEHYDROGENASE FROM RHODOBACTER CAPSULATUS                                                                                                                                            | OXIDOREDUCTASE              |
| 1JRP | CRYSTAL STRUCTURE OF XANTHINE DEHYDROGENASE INHIBITED BY ALLOXANTHINE FROM RHODOBACTER CAPSULATUS                                                                                                                  | OXIDOREDUCTASE              |
| 1JRR | HUMAN PLASMINOGEN ACTIVATOR INHIBITOR-2.[LOOP (66-98) DELETIONMUTANT] COMPLEXED WITH PEPTIDE MIMICKING THE REACTIVE CENTER LOOP                                                                                    | PEPTIDE BINDING PROTEIN     |
| 1JRS | HEMIACETAL COMPLEX BETWEEN LEUPEPTIN AND TRYPSIN                                                                                                                                                                   | HYDROLASE (SERINE PROTEASE) |
| 1JRT | HEMIACETAL COMPLEX BETWEEN LEUPEPTIN AND TRYPSIN                                                                                                                                                                   | HYDROLASE (SERINE PROTEASE) |
| 1JSD | CRYSTAL STRUCTURE OF SWINE H9 HAEMAGGLUTININ                                                                                                                                                                       | VIRAL PROTEIN               |

|      |                                                                                                                                       |                                        |
|------|---------------------------------------------------------------------------------------------------------------------------------------|----------------------------------------|
| 1JSH | CRYSTAL STRUCTURE OF H9 HAEMAGGLUTININ COMPLEXED WITH LSTA RECEPTOR ANALOG                                                            | VIRAL PROTEIN                          |
| 1JSI | CRYSTAL STRUCTURE OF H9 HAEMAGGLUTININ BOUND TO LSTC RECEPTOR ANALOG                                                                  | VIRAL PROTEIN                          |
| 1JSM | STRUCTURE OF H5 AVIAN HAEMAGGLUTININ                                                                                                  | VIRAL PROTEIN                          |
| 1JSN | STRUCTURE OF AVIAN H5 HAEMAGGLUTININ COMPLEXED WITH LSTA RECEPTOR ANALOG                                                              | VIRAL PROTEIN                          |
| 1JSO | STRUCTURE OF AVIAN H5 HAEMAGGLUTININ BOUND TO LSTC RECEPTOR ANALOG                                                                    | VIRAL PROTEIN                          |
| 1JST | PHOSPHORYLATED CYCLIN-DEPENDENT KINASE-2 BOUND TO CYCLIN A                                                                            | COMPLEX (PROTEIN KINASE/CYCLIN)        |
| 1JSU | P27(KIP1)/CYCLIN A/CDK2 COMPLEX                                                                                                       | COMPLEX (TRANSFERASE/CYCLIN/INHIBITOR) |
| 1JTD | CRYSTAL STRUCTURE OF BETA-LACTAMASE INHIBITOR PROTEIN-II IN COMPLEX WITH TEM-1 BETA-LACTAMASE                                         | HYDROLASE/INHIBITOR                    |
| 1JTG | CRYSTAL STRUCTURE OF TEM-1 BETA-LACTAMASE / BETA-LACTAMASE INHIBITOR PROTEIN COMPLEX                                                  | HYDROLASE                              |
| 1JTH | CRYSTAL STRUCTURE AND BIOPHYSICAL PROPERTIES OF A COMPLEX BETWEEN THE N-TERMINAL REGION OF SNAP25 AND THE SNARE REGION OF SYNTAXIN 1A | ENDOCYTOSIS/EXOCYTOSIS                 |
| 1JTO | DEGENERATE INTERFACES IN ANTIGEN-ANTIBODY COMPLEXES                                                                                   | ANTIBODY, HYDROLASE                    |
| 1JTP | DEGENERATE INTERFACES IN ANTIGEN-ANTIBODY COMPLEXES                                                                                   | ANTIBODY, HYDROLASE                    |
| 1JTT | DEGENERATE INTERFACES IN ANTIGEN-ANTIBODY COMPLEXES                                                                                   | IMMUNE SYSTEM, LYSOZYME                |
| 1JU5 | TERNARY COMPLEX OF AN CRK SH2 DOMAIN, CRK-DERIVED PHOPHOPEPTIDE, AND ABL SH3 DOMAIN BY NMR SPECTROSCOPY                               | PROTEIN BINDING/TRANSFERASE            |
| 1JUF | STRUCTURE OF MINOR HISTOCOMPATIBILITY ANTIGEN PEPTIDE, H13B, COMPLEXED TO H2-DB                                                       | IMMUNE SYSTEM                          |
| 1JUQ | GGA3 VHS DOMAIN COMPLEXED WITH C-TERMINAL PEPTIDE FROM CATION-DEPENDENT MANNOSE 6-PHOSPHATE RECEPTOR                                  | SIGNALING PROTEIN                      |
| 1JV2 | CRYSTAL STRUCTURE OF THE EXTRACELLULAR SEGMENT OF INTEGRIN ALPHAVBETA3                                                                | CELL ADHESION                          |
| 1JVQ | CRYSTAL STRUCTURE AT 2.6A OF THE TERNARY COMPLEX BETWEEN ANTITHROMBIN, A P14-P8 REACTIVE LOOP PEPTIDE, AND AN EXOGENOUS TETRAPEPTIDE  | BLOOD CLOTTING, HYDROLASE INHIBITOR    |
| 1JVZ | STRUCTURE OF CEPHALOSPORIN ACYLASE IN COMPLEX WITH GLUTARYL-7-AMINOCEPHALOSPORANIC ACID                                               | HYDROLASE                              |
| 1JW0 | STRUCTURE OF CEPHALOSPORIN ACYLASE IN COMPLEX WITH GLUTARATE                                                                          | HYDROLASE                              |
| 1JW9 | STRUCTURE OF THE NATIVE MOEB-MOAD PROTEIN COMPLEX                                                                                     | LIGASE                                 |
| 1JWA | STRUCTURE OF THE ATP-BOUND MOEB-MOAD PROTEIN COMPLEX                                                                                  | LIGASE                                 |
| 1JWB | STRUCTURE OF THE COVALENT ACYL-ADENYLATE FORM OF THE MOEB-MOAD PROTEIN COMPLEX                                                        | LIGASE                                 |
| 1JWG | VHS DOMAIN OF HUMAN GGA1 COMPLEXED WITH CATION-INDEPENDENT M6PR C-TERMINAL PEPTIDE                                                    | PROTEIN TRANSPORT/PROTEIN BINDING      |

|      |                                                                                                                                                   |                               |
|------|---------------------------------------------------------------------------------------------------------------------------------------------------|-------------------------------|
| 1JWH | CRYSTAL STRUCTURE OF HUMAN PROTEIN KINASE CK2 HOLOENZYME                                                                                          | TRANSFERASE                   |
| 1JWI | CRYSTAL STRUCTURE OF BITISCETIN, A VON WILLEBAND FACTOR-DEPENDENT PLATELET AGGREGATION INDUCER.                                                   | TOXIN                         |
| 1JWM | CRYSTAL STRUCTURE OF THE COMPLEX OF THE MHC CLASS II MOLECULE HLA-DR1(HA PEPTIDE 306-318) WITH THE SUPERANTIGEN SEC3                              | IMMUNE SYSTEM                 |
| 1JWS | CRYSTAL STRUCTURE OF THE COMPLEX OF THE MHC CLASS II MOLECULE HLA-DR1 (HA PEPTIDE 306-318) WITH THE SUPERANTIGEN SEC3 VARIANT 3B1                 | IMMUNE SYSTEM                 |
| 1JWU | CRYSTAL STRUCTURE OF THE COMPLEX OF THE MHC CLASS II MOLECULE HLA-DR1 (HA PEPTIDE 306-318) WITH THE SUPERANTIGEN SEC3 VARIANT 3B2                 | IMMUNE SYSTEM                 |
| 1JWY | CRYSTAL STRUCTURE OF THE DYNAMIN A GTPASE DOMAIN COMPLEXED WITH GDP, DETERMINED AS MYOSIN FUSION                                                  | HYDROLASE                     |
| 1JX2 | CRYSTAL STRUCTURE OF THE NUCLEOTIDE-FREE DYNAMIN A GTPASE DOMAIN, DETERMINED AS MYOSIN FUSION                                                     | HYDROLASE                     |
| 1JX9 | PENICILLIN ACYLASE, MUTANT                                                                                                                        | HYDROLASE                     |
| 1JXP | BK STRAIN HEPATITIS C VIRUS (HCV) NS3-NS4A                                                                                                        | VIRAL PROTEIN COMPLEX         |
| 1JXQ | STRUCTURE OF CLEAVED, CARD DOMAIN DELETED CASPASE-9                                                                                               | HYDROLASE                     |
| 1JY2 | CRYSTAL STRUCTURE OF THE CENTRAL REGION OF BOVINE FIBRINOGEN (E5 FRAGMENT) AT 1.4 ANGSTROMS RESOLUTION                                            | BLOOD CLOTTING                |
| 1JY3 | CRYSTAL STRUCTURE OF THE CENTRAL REGION OF BOVINE FIBRINOGEN (E5 FRAGMENT) AT 1.4 ANGSTROMS RESOLUTION                                            | BLOOD CLOTTING                |
| 1JY7 | THE STRUCTURE OF HUMAN METHEMOGLOBIN. THE VARIATION OF A THEME                                                                                    | OXYGEN STORAGE/TRANSPORT      |
| 1JYO | STRUCTURE OF THE SALMONELLA VIRULENCE EFFECTOR SPTP IN COMPLEX WITH ITS SECRETION CHAPERONE SICP                                                  | CHAPERONE                     |
| 1JYQ | XRAY STRUCTURE OF GRB2 SH2 DOMAIN COMPLEXED WITH A HIGHLY AFFINE PHOSPHO PEPTIDE                                                                  | SIGNALING PROTEIN             |
| 1JYR | XRAY STRUCTURE OF GRB2 SH2 DOMAIN COMPLEXED WITH A PHOSPHORYLATED PEPTIDE                                                                         | SIGNALING PROTEIN             |
| 1JZD | DSBC-DSBDALPHA COMPLEX                                                                                                                            | OXIDOREDUCTASE                |
| 1K0Y | X-RAY CRYSTALLOGRAPHIC ANALYSES OF SYMMETRICAL ALLOSTERIC EFFECTORS OF HEMOGLOBIN. COMPOUNDS DESIGNED TO LINK PRIMARY AND SECONDARY BINDING SITES | OXYGEN STORAGE/TRANSPORT      |
| 1K1K | TRUCTURE OF MUTANT HUMAN CARBONMONOXYHEMOGLOBIN C (BETA E6K) AT 2.0 ANGSTROM RESOLUTION IN PHOSPHATE BUFFER.                                      | OXYGEN STORAGE/TRANSPORT      |
| 1K1T | COMBINING MUTATIONS IN HIV-1 PROTEASE TO UNDERSTAND MECHANISMS OF RESISTANCE                                                                      | HYDROLASE/HYDROLASE INHIBITOR |
| 1K1U | COMBINING MUTATIONS IN HIV-1 PROTEASE TO UNDERSTAND MECHANISMS OF RESISTANCE                                                                      | HYDROLASE/HYDROLASE INHIBITOR |
| 1K21 | HUMAN THROMBIN-INHIBITOR COMPLEX                                                                                                                  | HYDROLASE                     |
| 1K22 | HUMAN THROMBIN-INHIBITOR COMPLEX                                                                                                                  | HYDROLASE                     |

|      |                                                                                                                                                                                       |                                       |
|------|---------------------------------------------------------------------------------------------------------------------------------------------------------------------------------------|---------------------------------------|
| 1K2C | COMBINING MUTATIONS IN HIV-1 PROTEASE TO UNDERSTAND MECHANISMS OF RESISTANCE                                                                                                          | HYDROLASE/HYDROLASE INHIBITOR         |
| 1K2D | CRYSTAL STRUCTURE OF THE AUTOIMMUNE MHC CLASS II I-AU COMPLEXED WITH MYELIN BASIC PROTEIN 1-11 AT 2.2A                                                                                | IMMUNE SYSTEM                         |
| 1K2X | CRYSTAL STRUCTURE OF PUTATIVE ASPARAGINASE ENCODED BY ESCHERICHIA COLI YBIK GENE                                                                                                      | HYDROLASE                             |
| 1K3A | STRUCTURE OF THE INSULIN-LIKE GROWTH FACTOR 1 RECEPTOR KINASE                                                                                                                         | TRANSFERASE                           |
| 1K3B | CRYSTAL STRUCTURE OF HUMAN DIPEPTIDYL PEPTIDASE I (CATHEPSIN C): EXCLUSION DOMAIN ADDED TO AN ENDOPEPTIDASE FRAMEWORK CREATES THE MACHINE FOR ACTIVATION OF GRANULAR SERINE PROTEASES | HYDROLASE                             |
| 1K3U | CRYSTAL STRUCTURE OF WILD-TYPE TRYPTOPHAN SYNTHASE COMPLEXED WITH N-[1H-INDOL-3-YL-ACETYL]ASPARTIC ACID                                                                               | LYASE                                 |
| 1K3Z | X-RAY CRYSTAL STRUCTURE OF THE IKBB/NF-KB P65 HOMODIMER COMPLEX                                                                                                                       | TRANSCRIPTION                         |
| 1K4C | POTASSIUM CHANNEL KCSA-FAB COMPLEX IN HIGH CONCENTRATION OF K <sup>+</sup>                                                                                                            | MEMBRANE PROTEIN                      |
| 1K4D | POTASSIUM CHANNEL KCSA-FAB COMPLEX IN LOW CONCENTRATION OF K <sup>+</sup>                                                                                                             | MEMBRANE PROTEIN                      |
| 1K4W | X-RAY STRUCTURE OF THE ORPHAN NUCLEAR RECEPTOR ROR BETA LIGAND-BINDING DOMAIN IN THE ACTIVE CONFORMATION                                                                              | HORMONE/GROWTH FACTOR                 |
| 1K56 | OXA 10 CLASS D BETA-LACTAMASE AT PH 6.5                                                                                                                                               | HYDROLASE                             |
| 1K57 | OXA 10 CLASS D BETA-LACTAMASE AT PH 6.0                                                                                                                                               | HYDROLASE                             |
| 1K5D | CRYSTAL STRUCTURE OF RAN-GPPNHP-RANBP1-RANGAP COMPLEX                                                                                                                                 | SIGNALING PROTEIN/SIGNALING ACTIVATOR |
| 1K5G | CRYSTAL STRUCTURE OF RAN-GDP-ALFX-RANBP1-RANGAP COMPLEX                                                                                                                               | SIGNALING PROTEIN/SIGNALING ACTIVATOR |
| 1K5M | CRYSTAL STRUCTURE OF A HUMAN RHINOVIRUS TYPE 14:HUMAN IMMUNODEFICIENCY VIRUS TYPE 1 V3 LOOP CHIMERIC VIRUS MN-III-2                                                                   | VIRUS                                 |
| 1K5N | HLA-B*2709 BOUND TO NONA-PEPTIDE M9                                                                                                                                                   | IMMUNE SYSTEM                         |
| 1K5Q | PENICILLIN ACYLASE, MUTANT COMPLEXED WITH PAA                                                                                                                                         | HYDROLASE                             |
| 1K5S | PENICILLIN ACYLASE, MUTANT COMPLEXED WITH PPA                                                                                                                                         | HYDROLASE                             |
| 1K6L | HOTOSYNTHETIC REACTION CENTER FROM RHODOBACTER SPHAEROIDES                                                                                                                            | PHOTOSYNTHESIS                        |
| 1K6N | E(L212)A,D(L213)A DOUBLE MUTANT STRUCTURE OF PHOTOSYNTHETIC REACTION CENTER FROM RHODOBACTER SPHAEROIDES                                                                              | PHOTOSYNTHESIS                        |
| 1K6O | CRYSTAL STRUCTURE OF A TERNARY SAP-1/SRF/C-FOS SRE DNA COMPLEX                                                                                                                        | TRANSCRIPTION/DNA                     |
| 1K6Q | CRYSTAL STRUCTURE OF ANTIBODY FAB FRAGMENT D3                                                                                                                                         | IMMUNE SYSTEM                         |
| 1K73 | CO-CRYSTAL STRUCTURE OF ANISOMYCIN BOUND TO THE 50S RIBOSOMAL SUBUNIT                                                                                                                 | RIBOSOME                              |
| 1K74 | THE 2.3 ANGSTROM RESOLUTION CRYSTAL STRUCTURE OF THE                                                                                                                                  | TRANSCRIPTION                         |

HETERODIMER OF THE HUMAN PPARGAMMA AND RXRALPHA LIGAND BINDING DOMAINS RESPECTIVELY BOUND WITH GW409544 AND 9-CIS RETINOIC ACID AND CO-ACTIVATOR PEPTIDES.

|      |                                                                                                                                                      |                                   |
|------|------------------------------------------------------------------------------------------------------------------------------------------------------|-----------------------------------|
| 1K78 | PAX5(1-149)+ETS-1(331-440)+DNA                                                                                                                       | TRANSCRIPTION/DNA                 |
| 1K7D | PENICILLIN ACYLASE MUTANT WITH PHENYL PROPIONIC ACID                                                                                                 | HYDROLASE                         |
| 1K7E | CRYSTAL STRUCTURE OF WILD-TYPE TRYPTOPHAN SYNTHASE COMPLEXED WITH N-[1H-INDOL-3-YL-ACETYL]GLYCINE ACID                                               | LYASE                             |
| 1K7F | CRYSTAL STRUCTURE OF WILD-TYPE TRYPTOPHAN SYNTHASE COMPLEXED WITH N-[1H-INDOL-3-YL-ACETYL]VALINE ACID                                                | LYASE                             |
| 1K7L | THE 2.5 ANGSTROM RESOLUTION CRYSTAL STRUCTURE OF THE HUMAN PPARALPHA LIGAND BINDING DOMAIN BOUND WITH GW409544 AND A CO-ACTIVATOR PEPTIDE.           | TRANSCRIPTION                     |
| 1K7X | CRYSTAL STRUCTURE OF THE BETA-SER178PRO MUTANT OF TRYPTOPHAN SYNTHASE                                                                                | LYASE                             |
| 1K83 | CRYSTAL STRUCTURE OF YEAST RNA POLYMERASE II COMPLEXED WITH THE INHIBITOR ALPHA AMANITIN                                                             | TRANSCRIPTION                     |
| 1K8A | CO-CRYSTAL STRUCTURE OF CARBOMYCIN A BOUND TO THE 50S RIBOSOMAL SUBUNIT OF HALOARCUA MARISMORTUI                                                     | RIBOSOME                          |
| 1K8D | CRYSTAL STRUCTURE OF THE NON-CLASSICAL MHC CLASS IB QA-2 COMPLEXED WITH A SELF PEPTIDE                                                               | IMMUNE SYSTEM                     |
| 1K8I | CRYSTAL STRUCTURE OF MOUSE H2-DM                                                                                                                     | IMMUNE SYSTEM                     |
| 1K8K | CRYSTAL STRUCTURE OF ARP2/3 COMPLEX                                                                                                                  | STRUCTURAL PROTEIN                |
| 1K8R | CRYSTAL STRUCTURE OF RAS-BRY2RBD COMPLEX                                                                                                             | SIGNALING PROTEIN                 |
| 1K8X | CRYSTAL STRUCTURE OF ALPHAT183V MUTANT OF TRYPTOPHAN SYNTHASE FROM SALMONELLA TYPHIMURIUM                                                            | LYASE                             |
| 1K8Y | CRYSTAL STRUCTURE OF THE TRYPTOPHAN SYNTHASE BETA-SER178PRO MUTANT COMPLEXED WITH D,L-ALPHA-GLYCEROL-3-PHOSPHATE                                     | LYASE                             |
| 1K8Z | CRYSTAL STRUCTURE OF THE TRYPTOPHAN SYNTHASE BETA-SER178PRO MUTANT COMPLEXED WITH N-[1H-INDOL-3-YL-ACETYL]GLYCINE ACID                               | LYASE                             |
| 1K90 | CRYSTAL STRUCTURE OF THE ADENYLYL CYCLASE DOMAIN OF ANTHRAX EDEMA FACTOR (EF) IN COMPLEX WITH CALMODULIN AND 3' DEOXY-ATP                            | TOXIN,LYASE/METAL BINDING PROTEIN |
| 1K93 | CRYSTAL STRUCTURE OF THE ADENYLYL CYCLASE DOMAIN OF ANTHRAX EDEMA FACTOR (EF) IN COMPLEX WITH CALMODULIN                                             | TOXIN,LYASE/METAL BINDING PROTEIN |
| 1K9M | CO-CRYSTAL STRUCTURE OF TYLOSIN BOUND TO THE 50S RIBOSOMAL SUBUNIT OF HALOARCUA MARISMORTUI                                                          | RIBOSOME                          |
| 1KA9 | IMIDAZOLE GLYCEROL PHOSPHATE SYNTHASE                                                                                                                | TRANSFERASE                       |
| 1KAP | THREE-DIMENSIONAL STRUCTURE OF THE ALKALINE PROTEASE OF PSEUDOMONAS AERUGINOSA: A TWO-DOMAIN PROTEIN WITH A CALCIUM BINDING PARALLEL BETA ROLL MOTIF | ZINC METALLOPROTEASE              |
| 1KB5 | MURINE T-CELL RECEPTOR VARIABLE DOMAIN/FAB COMPLEX                                                                                                   | COMPLEX (IMMUNOGLOBULIN/RECEPTOR) |
| 1KB9 | YEAST CYTOCHROME BC1 COMPLEX                                                                                                                         | OXIDOREDUCTASE/ELECTRON TRANSPORT |

|      |                                                                                                                                                                                           |                                  |
|------|-------------------------------------------------------------------------------------------------------------------------------------------------------------------------------------------|----------------------------------|
| 1KBG | MHC CLASS I H-2KB PRESENTED GLYCOPEPTIDE RGY8-6H-GAL2                                                                                                                                     | IMMUNE SYSTEM                    |
| 1KBY | STRUCTURE OF PHOTOSYNTHETIC REACTION CENTER WITH BACTERIOCHLOROPHYLL-BACTERIOPHEOPHYTIN HETERODIMER                                                                                       | PHOTOSYNTHESIS                   |
| 1KC2 | STRUCTURE OF THE TRIPLE (LYS(BETA)D3ALA, ASP(BETA)C8ALA, ASPCD2ALA) MUTANT OF THE SRC SH2 DOMAIN BOUND TO THE POPYEEIPI PEPTIDE                                                           | TRANSFERASE                      |
| 1KC5 | CRYSTAL STRUCTURE OF ANTIBODY PC287 IN COMPLEX WITH PS1 PEPTIDE                                                                                                                           | IMMUNE SYSTEM                    |
| 1KC8 | CO-CRYSTAL STRUCTURE OF BLASTICIDIN S BOUND TO THE 50S RIBOSOMAL SUBUNIT                                                                                                                  | RIBOSOME                         |
| 1KCG | NKG2D IN COMPLEX WITH ULBP3                                                                                                                                                               | IMMUNE SYSTEM                    |
| 1KCR | CRYSTAL STRUCTURE OF ANTIBODY PC283 IN COMPLEX WITH PS1 PEPTIDE                                                                                                                           | IMMUNE SYSTEM                    |
| 1KCS | CRYSTAL STRUCTURE OF ANTIBODY PC282 IN COMPLEX WITH PS1 PEPTIDE                                                                                                                           | IMMUNE SYSTEM                    |
| 1KCU | CRYSTAL STRUCTURE OF ANTIBODY PC287                                                                                                                                                       | IMMUNE SYSTEM                    |
| 1KCV | CRYSTAL STRUCTURE OF ANTIBODY PC282                                                                                                                                                       | IMMUNE SYSTEM                    |
| 1KD1 | CO-CRYSTAL STRUCTURE OF SPIRAMYCIN BOUND TO THE 50S RIBOSOMAL SUBUNIT OF HALOARCUA MARISMORTUI                                                                                            | RIBOSOME                         |
| 1KD2 | CRYSTAL STRUCTURE OF HUMAN DEOXYHEMOGLOBIN IN ABSENCE OF ANY ANIONS                                                                                                                       | OXYGEN STORAGE/TRANSPORT         |
| 1KD8 | X-RAY STRUCTURE OF THE COILED COIL GCN4 ACID BASE HETERODIMER ACID-D12IA16V BASE-D12LA16L                                                                                                 | DE NOVO PROTEIN                  |
| 1KD9 | X-RAY STRUCTURE OF THE COILED COIL GCN4 ACID BASE HETERODIMER ACID-D12LA16L BASE-D12LA16L                                                                                                 | DE NOVO PROTEIN                  |
| 1KDD | X-RAY STRUCTURE OF THE COILED COIL GCN4 ACID BASE HETERODIMER ACID-D12LA16I BASE-D12LA16L                                                                                                 | DE NOVO PROTEIN                  |
| 1KDQ | CRYSTAL STRUCTURE ANALYSIS OF THE MUTANT S189D RAT CHYMOTRYPSIN                                                                                                                           | HYDROLASE                        |
| 1KDV | PSEUDOMONAS SERINE-CARBOXYL PROTEINASE COMPLEXED WITH THE INHIBITOR AIAF (THIS ENZYME RENAMED "SEDOLISIN" IN 2003)                                                                        | HYDROLASE                        |
| 1KDX | KIX DOMAIN OF MOUSE CBP (CREB BINDING PROTEIN) IN COMPLEX WITH PHOSPHORYLATED KINASE INDUCIBLE DOMAIN (PKID) OF RAT CREB (CYCLIC AMP RESPONSE ELEMENT BINDING PROTEIN), NMR 17 STRUCTURES | TRANSCRIPTION REGULATION COMPLEX |
| 1KDY | PSEUDOMONAS SERINE-CARBOXYL PROTEINASE COMPLEXED WITH THE INHIBITOR AIPF (THIS ENZYME RENAMED "SEDOLISIN" IN 2003)                                                                        | HYDROLASE                        |
| 1KDZ | PSEUDOMONAS SERINE-CARBOXYL PROTEINASE COMPLEXED WITH THE INHIBITOR TYROSTATIN (THIS ENZYME RENAMED "SEDOLISIN" IN 2003)                                                                  | HYDROLASE                        |
| 1KE1 | PSEUDOMONAS SERINE-CARBOXYL PROTEINASE COMPLEXED WITH THE INHIBITOR PSEUDOTYROSTATIN (THIS ENZYME RENAMED "SEDOLISIN" IN 2003)                                                            | HYDROLASE                        |
| 1KE2 | PSEUDOMONAS SERINE-CARBOXYL PROTEINASE COMPLEXED WITH THE                                                                                                                                 | HYDROLASE                        |

|      |                                                                                                                                |                             |
|------|--------------------------------------------------------------------------------------------------------------------------------|-----------------------------|
|      | INHIBITOR CHYMOSTATIN (THIS ENZYME RENAMED "SEDOLISIN" IN 2003)                                                                |                             |
| 1KEC | PENICILLIN ACYLASE MUTANT WITH PHENYL PROPIONIC ACID                                                                           | HYDROLASE                   |
| 1KEE | INACTIVATION OF THE AMIDOTRANSFERASE ACTIVITY OF CARBAMOYL PHOSPHATE SYNTHETASE BY THE ANTIBIOTIC ACIVICIN                     | LIGASE                      |
| 1KEG | ANTIBODY 64M-2 FAB COMPLEXED WITH DTT(6-4)TT                                                                                   | IMMUNE SYSTEM/DNA           |
| 1KEL | CATALYTIC ANTIBODY 28B4 FAB FRAGMENT COMPLEXED WITH HAPTEN (1-[N-4'-NITROBENZYL-N-4'-CARBOXYBUTYLAMINO] METHYLPHOSPHONIC ACID) | CATALYTIC ANTIBODY          |
| 1KEM | CATALYTIC ANTIBODY 28B4 FAB FRAGMENT                                                                                           | CATALYTIC ANTIBODY          |
| 1KEN | INFLUENZA VIRUS HEMAGGLUTININ COMPLEXED WITH AN ANTIBODY THAT PREVENTS THE HEMAGGLUTININ LOW PH FUSOGENIC TRANSITION           | VIRAL PROTEIN/IMMUNE SYSTEM |
| 1KF6 | E. COLI QUINOL-FUMARATE REDUCTASE WITH BOUND INHIBITOR HQNO                                                                    | OXIDOREDUCTASE              |
| 1KF9 | PHAGE DISPLAY DERIVED VARIANT OF HUMAN GROWTH HORMONE COMPLEXED WITH TWO COPIES OF THE EXTRACELLULAR DOMAIN OF ITS RECEPTOR    | HORMONE/GROWTH FACTOR       |
| 1KFA | CRYSTAL STRUCTURE OF FAB FRAGMENT COMPLEXED WITH GIBBERELLIN A4                                                                | IMMUNE SYSTEM               |
| 1KFB | CRYSTAL STRUCTURE OF ALPHAT183V MUTANT OF TRYPTOPHAN SYNTHASE FROM SALMONELLA TYPHIMURIUM WITH INDOLE GLYCEROL PHOSPHATE       | LYASE                       |
| 1KFC | CRYSTAL STRUCTURE OF ALPHAT183V MUTANT OF TRYPTOPHAN SYNTHASE FROM SALMONELLA TYPHIMURIUM WITH INDOLE PROPANOL PHOSPHATE       | LYASE                       |
| 1KFE | CRYSTAL STRUCTURE OF ALPHAT183V MUTANT OF TRYPTOPHAN SYNTHASE FROM SALMONELLA TYPHIMURIUM WITH L-SER BOUND TO THE BETA SITE    | LYASE                       |
| 1KFJ | CRYSTAL STRUCTURE OF WILD-TYPE TRYPTOPHAN SYNTHASE COMPLEXED WITH L-SERINE                                                     | LYASE                       |
| 1KFK | CRYSTAL STRUCTURE OF TRYPTOPHAN SYNTHASE FROM SALMONELLA TYPHIMURIUM                                                           | LYASE                       |
| 1KFU | CRYSTAL STRUCTURE OF HUMAN M-CALPAIN FORM II                                                                                   | HYDROLASE                   |
| 1KFX | CRYSTAL STRUCTURE OF HUMAN M-CALPAIN FORM I                                                                                    | HYDROLASE                   |
| 1KFY | QUINOL-FUMARATE REDUCTASE WITH QUINOL INHIBITOR 2-[1-(4-CHLORO-PHENYL)-ETHYL]-4,6-DINITRO-PHENOL                               | OXIDOREDUCTASE              |
| 1KG0 | STRUCTURE OF THE EPSTEIN-BARR VIRUS GP42 PROTEIN BOUND TO THE MHC CLASS II RECEPTOR HLA-DR1                                    | VIRAL PROTEIN/IMMUNE SYSTEM |
| 1KGC | IMMUNE RECEPTOR                                                                                                                | IMMUNE SYSTEM               |
| 1KHP | MONOCLINIC FORM OF PAPAINE/ZLFG-DAM COVALENT COMPLEX                                                                           | HYDROLASE                   |
| 1KHQ | ORTHORHOMBIC FORM OF PAPAINE/ZLFG-DAM COVALENT COMPLEX                                                                         | HYDROLASE                   |
| 1KI1 | GUANINE NUCLEOTIDE EXCHANGE REGION OF INTERSECTIN IN COMPLEX WITH CDC42                                                        | SIGNALING PROTEIN           |



|      |                                                                                                                                                 |                                          |
|------|-------------------------------------------------------------------------------------------------------------------------------------------------|------------------------------------------|
| 1KI6 | CRYSTAL STRUCTURE OF THYMIDINE KINASE FROM HERPES SIMPLEX VIRUS TYPE 1 COMPLEXED WITH A 5-IODOURACIL ANHYDROHEXITOL NUCLEOSIDE                  | PHOSPHOTRANSFERASE                       |
| 1KIG | BOVINE FACTOR XA                                                                                                                                | COMPLEX (PROTEASE/INHIBITOR)             |
| 1KIL | THREE-DIMENSIONAL STRUCTURE OF THE COMPLEXIN/SNARE COMPLEX                                                                                      | MEMBRANE PROTEIN                         |
| 1KIP | FV MUTANT Y(B 32)A (VH DOMAIN) OF MOUSE MONOCLONAL ANTIBODY D1.3 COMPLEXED WITH HEN EGG WHITE LYSOZYME                                          | COMPLEX (IMMUNOGLOBULIN/HYDROLASE)       |
| 1KIQ | FV MUTANT Y(B 101)F (VH DOMAIN) OF MOUSE MONOCLONAL ANTIBODY D1.3 COMPLEXED WITH HEN EGG WHITE LYSOZYME                                         | COMPLEX (IMMUNOGLOBULIN/HYDROLASE)       |
| 1KIR | FV MUTANT Y(A 50)S (VL DOMAIN) OF MOUSE MONOCLONAL ANTIBODY D1.3 COMPLEXED WITH HEN EGG WHITE LYSOZYME                                          | COMPLEX (IMMUNOGLOBULIN/HYDROLASE)       |
| 1KIU | FIMH ADHESIN Q133N MUTANT-FIMC CHAPERONE COMPLEX WITH METHYL-ALPHA-D-MANNOSE                                                                    | CHAPERONE/CELL ADHESION                  |
| 1KJ2 | MURINE ALLOREACTIVE SCFV TCR-PEPTIDE-MHC CLASS I MOLECULE COMPLEX                                                                               | IMMUNE SYSTEM                            |
| 1KJ3 | MHC CLASS I H-2KB MOLECULE COMPLEXED WITH PKB1 PEPTIDE                                                                                          | IMMUNE SYSTEM                            |
| 1KJ4 | SUBSTRATE SHAPE DETERMINES SPECIFICITY OF RECOGNITION RECOGNITION FOR HIV-1 PROTEASE: ANALYSIS OF CRYSTAL STRUCTURES OF SIX SUBSTRATE COMPLEXES | HYDROLASE                                |
| 1KJ7 | SUBSTRATE SHAPE DETERMINES SPECIFICITY OF RECOGNITION RECOGNITION FOR HIV-1 PROTEASE: ANALYSIS OF CRYSTAL STRUCTURES OF SIX SUBSTRATE COMPLEXES | HYDROLASE                                |
| 1KJF | SUBSTRATE SHAPE DETERMINES SPECIFICITY OF RECOGNITION RECOGNITION FOR HIV-1 PROTEASE: ANALYSIS OF CRYSTAL STRUCTURES OF SIX SUBSTRATE COMPLEXES | HYDROLASE                                |
| 1KJG | SUBSTRATE SHAPE DETERMINES SPECIFICITY OF RECOGNITION RECOGNITION FOR HIV-1 PROTEASE: ANALYSIS OF CRYSTAL STRUCTURES OF SIX SUBSTRATE COMPLEXES | HYDROLASE                                |
| 1KJH | SUBSTRATE SHAPE DETERMINES SPECIFICITY OF RECOGNITION RECOGNITION FOR HIV-1 PROTEASE: ANALYSIS OF CRYSTAL STRUCTURES OF SIX SUBSTRATE COMPLEXES | HYDROLASE                                |
| 1KJM | TAP-A-ASSOCIATED RAT MHC CLASS I MOLECULE                                                                                                       | IMMUNE SYSTEM                            |
| 1KJV | TAP-B-ASSOCIATED RAT MHC CLASS I MOLECULE                                                                                                       | IMMUNE SYSTEM                            |
| 1KJY | CRYSTAL STRUCTURE OF HUMAN G[ALPHA]I1 BOUND TO THE GOLOCO MOTIF OF RGS14                                                                        | SIGNALING PROTEIN                        |
| 1KK7 | SCALLOP MYOSIN IN THE NEAR RIGOR CONFORMATION                                                                                                   | CONTRACTILE PROTEIN                      |
| 1KK8 | SCALLOP MYOSIN (S1-ADP-BEFX) IN THE ACTIN-DETACHED CONFORMATION                                                                                 | CONTRACTILE PROTEIN                      |
| 1KKL | L.CASEI HPRK/P IN COMPLEX WITH B.SUBTILIS HPR                                                                                                   | TRANSFERASE, HYDROLASE/TRANSPORT PROTEIN |
| 1KKM | L.CASEI HPRK/P IN COMPLEX WITH B.SUBTILIS P-SER-HPR                                                                                             | TRANSFERASE, HYDROLASE/TRANSPORT PROTEIN |
| 1KLF | FIMH ADHESIN-FIMC CHAPERONE COMPLEX WITH D-MANNOSE                                                                                              | CHAPERONE/ADHESIN COMPLEX                |
| 1KLG | CRYSTAL STRUCTURE OF HLA-DR1/TPI(23-37, THR28-->ILE MUTANT) COMPLEXED WITH STAPHYLOCOCCAL ENTEROTOXIN C3 VARIANT 3B2                            | IMMUNE SYSTEM/TOXIN                      |

(SEC3-3B2)

|      |                                                                                                                                               |                          |
|------|-----------------------------------------------------------------------------------------------------------------------------------------------|--------------------------|
| 1KLI | COFACTOR-AND SUBSTRATE-ASSISTED ACTIVATION OF FACTOR VIIIA                                                                                    | HYDROLASE                |
| 1KLJ | CRYSTAL STRUCTURE OF UNINHIBITED FACTOR VIIIA                                                                                                 | HYDROLASE                |
| 1KLM | HIV-1 REVERSE TRANSCRIPTASE COMPLEXED WITH BHAP U-90152                                                                                       | NUCLEOTIDYLTRANSFERASE   |
| 1KLQ | THE MAD2 SPINDLE CHECKPOINT PROTEIN UNDERGOES SIMILAR MAJOR CONFORMATIONAL CHANGES UPON BINDING TO EITHER MAD1 OR CDC20                       | CELL CYCLE               |
| 1KLU | CRYSTAL STRUCTURE OF HLA-DR1/TPI(23-37) COMPLEXED WITH STAPHYLOCOCCAL ENTEROTOXIN C3 VARIANT 3B2 (SEC3-3B2)                                   | IMMUNE SYSTEM/TOXIN      |
| 1KMC | CRYSTAL STRUCTURE OF THE CASPASE-7 / XIAP-BIR2 COMPLEX                                                                                        | APOPTOSIS/HYDROLASE      |
| 1KMH | CRYSTAL STRUCTURE OF SPINACH CHLOROPLAST F1-ATPASE COMPLEXED WITH TENTOXIN                                                                    | HYDROLASE                |
| 1KMI | CRYSTAL STRUCTURE OF AN E.COLI CHEMOTAXIS PROTEIN, CHEZ                                                                                       | SIGNALING PROTEIN        |
| 1KN1 | CRYSTAL STRUCTURE OF ALLOPHYCOCYANIN                                                                                                          | ELECTRON TRANSPORT       |
| 1KN2 | CATALYTIC ANTIBODY D2.3 COMPLEX                                                                                                               | IMMUNE SYSTEM            |
| 1KN4 | CATALYTIC ANTIBODY D2.3 COMPLEX                                                                                                               | IMMUNE SYSTEM            |
| 1KNO | CRYSTAL STRUCTURE OF THE COMPLEX OF A CATALYTIC ANTIBODY FAB WITH A TRANSITION STATE ANALOG: STRUCTURAL SIMILARITIES IN ESTERASE-LIKE ABZYMES | CATALYTIC ANTIBODY       |
| 1KO6 | CRYSTAL STRUCTURE OF C-TERMINAL AUTOPROTEOLYTIC DOMAIN OF NUCLEOPORIN NUP98                                                                   | TRANSFERASE              |
| 1KPR | THE HUMAN NON-CLASSICAL MAJOR HISTOCOMPATIBILITY COMPLEX MOLECULE HLA-E                                                                       | IMMUNE SYSTEM            |
| 1KPS | STRUCTURAL BASIS FOR E2-MEDIATED SUMO CONJUGATION REVEALED BY A COMPLEX BETWEEN UBIQUITIN CONJUGATING ENZYME UBC9 AND RANGAP1                 | LIGASE/PROTEIN TRANSPORT |
| 1KPU | HIGH RESOLUTION CRYSTAL STRUCTURE OF THE MHC CLASS I COMPLEX H-2KB/VSV8                                                                       | IMMUNE SYSTEM            |
| 1KPV | HIGH RESOLUTION CRYSTAL STRUCTURE OF THE MHC CLASS I COMPLEX H-2KB/SEV9                                                                       | IMMUNE SYSTEM            |
| 1KQF | FORMATE DEHYDROGENASE N FROM E. COLI                                                                                                          | OXIDOREDUCTASE           |
| 1KQG | FORMATE DEHYDROGENASE N FROM E. COLI                                                                                                          | OXIDOREDUCTASE           |
| 1KQM | SCALLOP MYOSIN S1-AMPPNP IN THE ACTIN-DETACHED CONFORMATION                                                                                   | CONTRACTILE PROTEIN      |
| 1KQS | THE HALOARCUA MARISMORTUI 50S COMPLEXED WITH A PRETRANSLOCATIONAL INTERMEDIATE IN PROTEIN SYNTHESIS                                           | RIBOSOME                 |
| 1KRA | CRYSTAL STRUCTURE OF KLEBSIELLA AEROGENES UREASE, ITS APOENZYME AND TWO ACTIVE SITE MUTANTS                                                   | HYDROLASE (UREA AMIDO)   |
| 1KRB | CRYSTAL STRUCTURE OF KLEBSIELLA AEROGENES UREASE, ITS APOENZYME AND TWO ACTIVE SITE MUTANTS                                                   | HYDROLASE (UREA AMIDO)   |
| 1KRC | CRYSTAL STRUCTURE OF KLEBSIELLA AEROGENES UREASE, ITS APOENZYME AND TWO ACTIVE SITE MUTANTS                                                   | HYDROLASE (UREA AMIDO)   |

|      |                                                                                                                     |                                     |
|------|---------------------------------------------------------------------------------------------------------------------|-------------------------------------|
| 1KRL | CRYSTAL STRUCTURE OF RACEMIC DL-MONELLIN IN P-1                                                                     | PLANT PROTEIN                       |
| 1KSG | COMPLEX OF ARL2 AND PDE DELTA, CRYSTAL FORM 1                                                                       | SIGNALING PROTEIN/HYDROLASE         |
| 1KSH | COMPLEX OF ARL2 AND PDE DELTA, CRYSTAL FORM 2 (NATIVE)                                                              | SIGNALING PROTEIN/HYDROLASE         |
| 1KSJ | COMPLEX OF ARL2 AND PDE DELTA, CRYSTAL FORM 2 (SEMET)                                                               | SIGNALING PROTEIN/HYDROLASE         |
| 1KSN | CRYSTAL STRUCTURE OF HUMAN COAGULATION FACTOR XA COMPLEXED WITH FXV673                                              | HYDROLASE                           |
| 1KT2 | CRYSTAL STRUCTURE OF CLASS II MHC MOLECULE IEK BOUND TO MOTH CYTOCHROME C PEPTIDE                                   | IMMUNE SYSTEM                       |
| 1KTD | CRYSTAL STRUCTURE OF CLASS II MHC MOLECULE IEK BOUND TO PIGEON CYTOCHROME C PEPTIDE                                 | IMMUNE SYSTEM                       |
| 1KTK | COMPLEX OF STREPTOCOCCAL PYROGENIC ENTEROTOXIN C (SPEC) WITH A HUMAN T CELL RECEPTOR BETA CHAIN (VBETA2.1)          | IMMUNE SYSTEM                       |
| 1KTL | THE HUMAN NON-CLASSICAL MAJOR HISTOCOMPATIBILITY COMPLEX MOLECULE HLA-E                                             | IMMUNE SYSTEM                       |
| 1KTP | CRYSTAL STRUCTURE OF C-PHYCOCYANIN OF SYNECHOCOCCUS VULCANUS AT 1.6 ANGSTROMS                                       | PHOTOSYNTHESIS                      |
| 1KTS | THROMBIN INHIBITOR COMPLEX                                                                                          | HYDROLASE/BLOOD CLOTTING            |
| 1KTT | THROMBIN INHIBITOR COMPLEX                                                                                          | HYDROLASE/BLOOD CLOTTING            |
| 1KTZ | CRYSTAL STRUCTURE OF THE HUMAN TGF-BETA TYPE II RECEPTOR EXTRACELLULAR DOMAIN IN COMPLEX WITH TGF-BETA3             | CYTOKINE/CYTOKINE RECEPTOR          |
| 1KU6 | FASCICULIN 2-MOUSE ACETYLCHOLINESTERASE COMPLEX                                                                     | HYDROLASE/TOXIN                     |
| 1KUG | CRYSTAL STRUCTURE OF A TAIWAN HABU VENOM METALLOPROTEINASE COMPLEXED WITH ITS ENDOGENOUS INHIBITOR PENW             | HYDROLASE                           |
| 1KUK | CRYSTAL STRUCTURE OF A TAIWAN HABU VENOM METALLOPROTEINASE COMPLEXED WITH PEKW.                                     | HYDROLASE                           |
| 1KV6 | X-RAY STRUCTURE OF THE ORPHAN NUCLEAR RECEPTOR ERR3 LIGAND-BINDING DOMAIN IN THE CONSTITUTIVELY ACTIVE CONFORMATION | GENE REGULATION                     |
| 1KVD | KILLER TOXIN FROM HALOTOLERANT YEAST                                                                                | TOXIN                               |
| 1KVE | KILLER TOXIN FROM HALOTOLERANT YEAST                                                                                | TOXIN                               |
| 1KWO | SCALLOP MYOSIN S1-ATPGAMMAS-P-PDM IN THE ACTIN-DETACHED CONFORMATION                                                | CONTRACTILE PROTEIN                 |
| 1KX3 | X-RAY STRUCTURE OF THE NUCLEOSOME CORE PARTICLE, NCP146, AT 2.0 A RESOLUTION                                        | STRUCTURAL PROTEIN/DNA              |
| 1KX4 | X-RAY STRUCTURE OF THE NUCLEOSOME CORE PARTICLE, NCP146B, AT 2.6 A RESOLUTION                                       | STRUCTURAL PROTEIN/DNA              |
| 1KX5 | X-RAY STRUCTURE OF THE NUCLEOSOME CORE PARTICLE, NCP147, AT 1.9 A RESOLUTION                                        | STRUCTURAL PROTEIN/DNA              |
| 1KXP | CRYSTAL STRUCTURE OF HUMAN VITAMIN D-BINDING PROTEIN IN COMPLEX WITH SKELETAL ACTIN                                 | CONTRACTILE PROTEIN/PROTEIN BINDING |
| 1KXQ | CAMELID VHH DOMAIN IN COMPLEX WITH PORCINE PANCREATIC ALPHA-AMYLASE                                                 | HYDROLASE, IMMUNE SYSTEM            |

|      |                                                                                                                                         |                                      |
|------|-----------------------------------------------------------------------------------------------------------------------------------------|--------------------------------------|
| 1KXT | CAMELID VHH DOMAINS IN COMPLEX WITH PORCINE PANCREATIC ALPHA-AMYLASE                                                                    | HYDROLASE, IMMUNE SYSTEM             |
| 1KXV | CAMELID VHH DOMAINS IN COMPLEX WITH PORCINE PANCREATIC ALPHA-AMYLASE                                                                    | HYDROLASE, IMMUNE SYSTEM             |
| 1KY7 | THE AP-2 CLATHRIN ADAPTOR ALPHA-APPENDAGE IN COMPLEX WITH AMPHIPHYSIN FXDXF                                                             | ENDOCYTOSIS/EXOCYTOSIS               |
| 1KYD | AP-2 CLATHRIN ADAPTOR ALPHA-APPENDAGE IN COMPLEX WITH EPSIN DPW PEPTIDE                                                                 | ENDOCYTOSIS/EXOCYTOSIS               |
| 1KYE | FACTOR XA IN COMPLEX WITH (R)-2-(3-ADAMANTAN-1-YL-UREIDO)-3-(3-CARBAMIMIDOYL-PHENYL)-N-PHENETHYL-PROPIONAMIDE                           | HYDROLASE                            |
| 1KYF | AP-2 CLATHRIN ADAPTOR ALPHA-APPENDAGE IN COMPLEX WITH EPS15 DPF PEPTIDE                                                                 | ENDOCYTOSIS/EXOCYTOSIS               |
| 1KYI | HSLUV (H. INFLUENZAE)-NLVS VINYL SULFONE INHIBITOR COMPLEX                                                                              | CHAPERONE/HYDROLASE                  |
| 1KYO | YEAST CYTOCHROME BC1 COMPLEX WITH BOUND SUBSTRATE CYTOCHROME C                                                                          | OXIDOREDUCTASE/ELECTRON TRANSPORT    |
| 1KYU | AP-2 CLATHRIN ADAPTOR ALPHA-APPENDAGE IN COMPLEX WITH EPS15 DPF PEPTIDE                                                                 | ENDOCYTOSIS/EXOCYTOSIS               |
| 1KZ7 | CRYSTAL STRUCTURE OF THE DH/PH FRAGMENT OF MURINE DBS IN COMPLEX WITH THE PLACENTAL ISOFORM OF HUMAN CDC42                              | SIGNALING PROTEIN                    |
| 1KZG | DBSCDC42(Y889F)                                                                                                                         | SIGNALING PROTEIN                    |
| 1KZO | PROTEIN FARNESYLTRANSFERASE COMPLEXED WITH FARNESYLATED K-RAS4B PEPTIDE PRODUCT AND FARNESYL DIPHOSPHATE SUBSTRATE BOUND SIMULTANEOUSLY | TRANSFERASE                          |
| 1KZP | PROTEIN FARNESYLTRANSFERASE COMPLEXED WITH A FARNESYLATED K-RAS4B PEPTIDE PRODUCT                                                       | TRANSFERASE                          |
| 1KZU | INTEGRAL MEMBRANE PERIPHERAL LIGHT HARVESTING COMPLEX FROM RHODOPSEUDOMONAS ACIDOPHILA STRAIN 10050                                     | LIGHT-HARVESTING PROTEIN             |
| 1KZY | CRYSTAL STRUCTURE OF THE 53BP1 BRCT REGION COMPLEXED TO TUMOR SUPPRESSOR P53                                                            | DNA BINDING PROTEIN, PROTEIN BINDING |
| 1L0A | DOWNSTREAM REGULATOR TANK BINDS TO THE CD40 RECOGNITION SITE ON TRAF3                                                                   | SIGNALING PROTEIN                    |
| 1L0N | NATIVE STRUCTURE OF BOVINE MITOCHONDRIAL CYTOCHROME BC1 COMPLEX                                                                         | OXIDOREDUCTASE                       |
| 1L0O | CRYSTAL STRUCTURE OF THE BACILLUS STEAROTHERMOPHILUS ANTI-SIGMA FACTOR SPOIIAB WITH THE SPORULATION SIGMA FACTOR SIGMAF                 | PROTEIN BINDING                      |
| 1L0V | QUINOL-FUMARATE REDUCTASE WITH MENAQUINOL MOLECULES                                                                                     | OXIDOREDUCTASE                       |
| 1L0X | TCR BETA CHAIN COMPLEXED WITH STREPTOCOCCAL SUPERANTIGEN SPEA                                                                           | IMMUNE SYSTEM                        |
| 1L0Y | T CELL RECEPTOR BETA CHAIN COMPLEXED WITH SUPERANTIGEN SPEA SOAKED WITH ZINC                                                            | IMMUNE SYSTEM                        |
| 1L1O | STRUCTURE OF THE HUMAN REPLICATION PROTEIN A (RPA) TRIMERIZATION CORE                                                                   | DNA BINDING PROTEIN                  |

|      |                                                                                                                                                                                                        |                                       |
|------|--------------------------------------------------------------------------------------------------------------------------------------------------------------------------------------------------------|---------------------------------------|
| 1L2I | HUMAN ESTROGEN RECEPTOR ALPHA LIGAND-BINDING DOMAIN IN COMPLEX WITH (R,R)-5,11-CIS-DIETHYL-5,6,11,12-TETRAHYDROCHRYSENE-2,8-DIOL AND A GLUCOCORTICOID RECEPTOR INTERACTING PROTEIN 1 NR BOX II PEPTIDE | TRANSCRIPTION RECEPTOR/COACTIVATOR    |
| 1L2O | SCALLOP MYOSIN S1-ADP-P-PDM IN THE ACTIN-DETACHED CONFORMATION                                                                                                                                         | CONTRACTILE PROTEIN                   |
| 1L2W | CRYSTAL STRUCTURE OF THE YERSINIA VIRULENCE EFFECTOR YOPE CHAPERONE-BINDING DOMAIN IN COMPLEX WITH ITS SECRETION CHAPERONE, SYCE                                                                       | CHAPERONE                             |
| 1L3R | CRYSTAL STRUCTURE OF A TRANSITION STATE MIMIC OF THE CATALYTIC SUBUNIT OF CAMP-DEPENDENT PROTEIN KINASE                                                                                                | TRANSFERASE                           |
| 1L4A | X-RAY STRUCTURE OF THE NEURONAL COMPLEXIN/SNARE COMPLEX FROM THE SQUID LOLIGO PEALEI                                                                                                                   | ENDOCYTOSIS/EXOCYTOSIS                |
| 1L4D | CRYSTAL STRUCTURE OF MICROPLASMINOGEN-STREPTOKINASE ALPHA DOMAIN COMPLEX                                                                                                                               | HYDROLASE/HYDROLASE ACTIVATOR         |
| 1L4Z | X-RAY CRYSTAL STRUCTURE OF THE COMPLEX OF MICROPLASMINOGEN WITH ALPHA DOMAIN OF STREPTOKINASE IN THE PRESENCE CADMIUM IONS                                                                             | HYDROLASE/BLOOD CLOTTING              |
| 1L5G | CRYSTAL STRUCTURE OF THE EXTRACELLULAR SEGMENT OF INTEGRIN AVB3 IN COMPLEX WITH AN ARG-GLY-ASP LIGAND                                                                                                  | CELL ADHESION                         |
| 1L5H | FEMO-COFACTOR DEFICIENT NITROGENASE MOFE PROTEIN                                                                                                                                                       | OXIDOREDUCTASE                        |
| 1L6O | XENOPUS DISHEVELLED PDZ DOMAIN                                                                                                                                                                         | GENE REGULATION                       |
| 1L6X | FC FRAGMENT OF RITUXIMAB BOUND TO A MINIMIZED VERSION OF THE B-DOMAIN FROM PROTEIN A CALLED Z34C                                                                                                       | IMMUNE SYSTEM                         |
| 1L7I | CRYSTAL STRUCTURE OF THE ANTI-ERBB2 FAB2C4                                                                                                                                                             | IMMUNE SYSTEM                         |
| 1L7T | CRYSTAL STRUCTURE ANALYSIS OF THE ANTI-TESTOSTERONE FAB FRAGMENT                                                                                                                                       | IMMUNE SYSTEM                         |
| 1L7V | BACTERIAL ABC TRANSPORTER INVOLVED IN B12 UPTAKE                                                                                                                                                       | TRANSPORT PROTEIN/HYDROLASE           |
| 1L7Z | CRYSTAL STRUCTURE OF CA <sup>2+</sup> /CALMODULIN COMPLEXED WITH MYRISTOYLATED CAP-23/NAP-22 PEPTIDE                                                                                                   | METAL BINDING PROTEIN/PROTEIN BINDING |
| 1L9B | X-RAY STRUCTURE OF THE CYTOCHROME-C(2)-PHOTOSYNTHETIC REACTION CENTER ELECTRON TRANSFER COMPLEX FROM RHODOBACTER SPHAEROIDES IN TYPE II CO-CRYSTALS                                                    | PHOTOSYNTHESIS                        |
| 1L9J | X-RAY STRUCTURE OF THE CYTOCHROME-C(2)-PHOTOSYNTHETIC REACTION CENTER ELECTRON TRANSFER COMPLEX FROM RHODOBACTER SPHAEROIDES IN TYPE I CO-CRYSTALS                                                     | PHOTOSYNTHESIS                        |
| 1LA6 | THE CRYSTAL STRUCTURE OF TREMATOMUS NEWNESI HEMOGLOBIN IN A PARTIAL HEMICHROME STATE                                                                                                                   | OXYGEN STORAGE/TRANSPORT              |
| 1LB1 | CRYSTAL STRUCTURE OF THE DBL AND PLECKSTRIN HOMOLOGY DOMAINS OF DBS IN COMPLEX WITH RHOA                                                                                                               | SIGNALING PROTEIN                     |
| 1LB2 | STRUCTURE OF THE E. COLI ALPHA C-TERMINAL DOMAIN OF RNA POLYMERASE IN COMPLEX WITH CAP AND DNA                                                                                                         | GENE REGULATION/DNA                   |
| 1LCJ | SH2 (SRC HOMOLOGY-2) DOMAIN OF HUMAN P56-LCK TYROSINE KINASE COMPLEXED WITH THE 11 RESIDUE PHOSPHOTYROSYL                                                                                              | COMPLEX (KINASE/PEPTIDE)              |

## PEPTIDE EPQPYEEIPIYL

|      |                                                                                                                                    |                                  |
|------|------------------------------------------------------------------------------------------------------------------------------------|----------------------------------|
| 1LCK | SH3-SH2 DOMAIN FRAGMENT OF HUMAN P56-LCK TYROSINE KINASE COMPLEXED WITH THE 10 RESIDUE SYNTHETIC PHOSPHOTYROSYL PEPTIDE TEGQPYQPQA | COMPLEX (KINASE/PEPTIDE)         |
| 1LD7 | CO-CRYSTAL STRUCTURE OF HUMAN FARNESYLTRANSFERASE WITH FARNESYLDIPHOSPHATE AND INHIBITOR COMPOUND 66                               | TRANSFERASE                      |
| 1LD8 | CO-CRYSTAL STRUCTURE OF HUMAN FARNESYLTRANSFERASE WITH FARNESYLDIPHOSPHATE AND INHIBITOR COMPOUND 49                               | TRANSFERASE                      |
| 1LD9 | THE THREE-DIMENSIONAL STRUCTURE OF AN H-2LD PEPTIDE COMPLEX EXPLAINS THE UNIQUE INTERACTION OF LD WITH BETA2M AND PEPTIDE          | MAJOR HISTOCOMPATIBILITY COMPLEX |
| 1LDJ | STRUCTURE OF THE CUL1-RBX1-SKP1-F BOXSKP2 SCF UBIQUITIN LIGASE COMPLEX                                                             | LIGASE                           |
| 1LDK | STRUCTURE OF THE CUL1-RBX1-SKP1-F BOXSKP2 SCF UBIQUITIN LIGASE COMPLEX                                                             | LIGASE                           |
| 1LDP | CRYSTAL STRUCTURE OF MURINE MHC CLASS I H-2LD WITH A MIXTURE OF BOUND PEPTIDES                                                     | COMPLEX (MHC I/PEPTIDE)          |
| 1LE8 | CRYSTAL STRUCTURE OF THE MATA1/MATALPHA2-3A HETERODIMER BOUND TO DNA COMPLEX                                                       | TRANSCRIPTION/DNA                |
| 1LEG | CRYSTAL STRUCTURE OF H-2KB BOUND TO THE DEV8 PEPTIDE                                                                               | IMMUNE SYSTEM                    |
| 1LEK | CRYSTAL STRUCTURE OF H-2KBM3 BOUND TO DEV8                                                                                         | IMMUNE SYSTEM                    |
| 1LEM | THE MONOSACCHARIDE BINDING SITE OF LENTIL LECTIN: AN X-RAY AND MOLECULAR MODELLING STUDY                                           | LECTIN                           |
| 1LEN | REFINEMENT OF TWO CRYSTAL FORMS OF LENTIL LECTIN AT 1.8 ANGSTROMS RESOLUTION                                                       | LECTIN                           |
| 1LEW | CRYSTAL STRUCTURE OF MAP KINASE P38 COMPLEXED TO THE DOCKING SITE ON ITS NUCLEAR SUBSTRATE MEF2A                                   | TRANSFERASE                      |
| 1LEZ | CRYSTAL STRUCTURE OF MAP KINASE P38 COMPLEXED TO THE DOCKING SITE ON ITS ACTIVATOR MKK3B                                           | TRANSFERASE                      |
| 1LF8 | COMPLEX OF GGA3-VHS DOMAIN AND CI-MPR C-TERMINAL PHOSHOPEPTIDE                                                                     | SIGNALING PROTEIN                |
| 1LFD | CRYSTAL STRUCTURE OF THE ACTIVE RAS PROTEIN COMPLEXED WITH THE RAS-INTERACTING DOMAIN OF RALGDS                                    | COMPLEX (RALGDS/RAS)             |
| 1LFL | DEOXY HEMOGLOBIN (90% RELATIVE HUMIDITY)                                                                                           | OXYGEN STORAGE/TRANSPORT         |
| 1LFQ | OXY HEMOGLOBIN (93% RELATIVE HUMIDITY)                                                                                             | OXYGEN STORAGE/TRANSPORT         |
| 1LFT | OXY HEMOGLOBIN (90% RELATIVE HUMIDITY)                                                                                             | OXYGEN STORAGE/TRANSPORT         |
| 1LFV | OXY HEMOGLOBIN (88% RELATIVE HUMIDITY)                                                                                             | OXYGEN STORAGE/TRANSPORT         |
| 1LFY | OXY HEMOGLOBIN (84% RELATIVE HUMIDITY)                                                                                             | OXYGEN STORAGE/TRANSPORT         |
| 1LFZ | OXY HEMOGLOBIN (25% METHANOL)                                                                                                      | OXYGEN STORAGE/TRANSPORT         |
| 1LGH | CRYSTAL STRUCTURE OF THE LIGHT-HARVESTING COMPLEX II (B800-850) FROM RHODOSPIRILLUM MOLISCHIANUM                                   | LIGHT HARVESTING COMPLEX         |

|      |                                                                                                                                                                  |                                     |
|------|------------------------------------------------------------------------------------------------------------------------------------------------------------------|-------------------------------------|
| 1LHC | UMAN ALPHA-THROMBIN COMPLEXED WITH AC-(D)PHE-PRO-BOROARG-OH                                                                                                      | COMPLEX (SERINE PROTEASE/INHIBITOR) |
| 1LHD | IUMAN ALPHA-THROMBIN COMPLEXED WITH AC-(D)PHE-PRO-BOROLYS-OH                                                                                                     | COMPLEX (SERINE PROTEASE/INHIBITOR) |
| 1LHE | HUMAN ALPHA-THROMBIN COMPLEXED WITH AC-(D)PHE-PRO-BORO-N-BUTYL-AMIDINO-GLYCINE-OH                                                                                | COMPLEX (SERINE PROTEASE/INHIBITOR) |
| 1LHF | HUMAN ALPHA-THROMBIN COMPLEXED WITH AC-(D)PHE-PRO-BORO-HOMOLYS-OH                                                                                                | COMPLEX (SERINE PROTEASE/INHIBITOR) |
| 1LHG | HUMAN ALPHA-THROMBIN COMPLEXED WITH AC-(D)PHE-PRO-BOROORNITHINE-OH                                                                                               | COMPLEX (SERINE PROTEASE/INHIBITOR) |
| 1LII | THE 1.9-Å CRYSTAL STRUCTURE OF THE NONCOLLAGENOUS (NC1) DOMAIN OF HUMAN PLACENTA COLLAGEN IV SHOWS STABILIZATION VIA A NOVEL TYPE OF COVALENT MET-LYS CROSS-LINK | STRUCTURAL PROTEIN                  |
| 1LIA | CRYSTAL STRUCTURE OF R-PHYCOERYTHRIN FROM POLYSIPHONIA AT 2.8 Å RESOLUTION                                                                                       | LIGHT HARVESTING PROTEIN            |
| 1LJ2 | RECOGNITION OF EIF4G BY ROTAVIRUS NSP3 REVEALS A BASIS FOR MRNA CIRCULARIZATION                                                                                  | VIRAL PROTEIN/ TRANSLATION          |
| 1LJW | CRYSTAL STRUCTURE OF HUMAN CARBONMONOXY HEMOGLOBIN AT 2.16 Å: A SNAPSHOT OF THE ALLOSTERIC TRANSITION                                                            | OXYGEN STORAGE/TRANSPORT            |
| 1LK2 | 1.35Å CRYSTAL STRUCTURE OF H-2KB COMPLEXED WITH THE GNYSFYAL PEPTIDE                                                                                             | IMMUNE SYSTEM                       |
| 1LK3 | ENGINEERED HUMAN INTERLEUKIN-10 MONOMER COMPLEXED TO 9D7 FAB FRAGMENT                                                                                            | IMMUNE SYSTEM                       |
| 1LK6 | STRUCTURE OF DIMERIC ANTITHROMBIN COMPLEXED WITH A P14-P9 REACTIVE LOOP PEPTIDE AND AN EXOGENOUS TRIPEPTIDE                                                      | BLOOD CLOTTING                      |
| 1LKK | HUMAN P56-LCK TYROSINE KINASE SH2 DOMAIN IN COMPLEX WITH THE PHOSPHOTYROSYL PEPTIDE AC-PTYR-GLU-GLU-ILE (PYEEI PEPTIDE)                                          | COMPLEX (TYROSINE KINASE/PEPTIDE)   |
| 1LKL | HUMAN P56-LCK TYROSINE KINASE SH2 DOMAIN IN COMPLEX WITH THE PHOSPHOTYROSYL PEPTIDE AC-PTYR-GLU-GLU-GLY (PYEEG PEPTIDE)                                          | COMPLEX (TYROSINE KINASE/PEPTIDE)   |
| 1LKY | STRUCTURE OF THE WILD-TYPE TEL-SAM POLYMER                                                                                                                       | TRANSCRIPTION                       |
| 1LM8 | STRUCTURE OF A HIF-1A-PVHL-ELONGINB-ELONGINC COMPLEX                                                                                                             | TRANSCRIPTION                       |
| 1LNA | A STRUCTURAL ANALYSIS OF METAL SUBSTITUTIONS IN THERMOLYSIN                                                                                                      | METALLOPROTEASE                     |
| 1LNB | A STRUCTURAL ANALYSIS OF METAL SUBSTITUTIONS IN THERMOLYSIN                                                                                                      | HYDROLASE (METALLOPROTEASE)         |
| 1LNC | A STRUCTURAL ANALYSIS OF METAL SUBSTITUTIONS IN THERMOLYSIN                                                                                                      | HYDROLASE (METALLOPROTEASE)         |
| 1LND | A STRUCTURAL ANALYSIS OF METAL SUBSTITUTIONS IN THERMOLYSIN                                                                                                      | HYDROLASE (METALLOPROTEASE)         |
| 1LNE | A STRUCTURAL ANALYSIS OF METAL SUBSTITUTIONS IN THERMOLYSIN                                                                                                      | HYDROLASE (METALLOPROTEASE)         |
| 1LNF | A STRUCTURAL ANALYSIS OF METAL SUBSTITUTIONS IN THERMOLYSIN                                                                                                      | HYDROLASE (METALLOPROTEASE)         |
| 1LNU | CRYSTAL STRUCTURE OF CLASS II MHC MOLECULE IAB BOUND TO EALPHA3K PEPTIDE                                                                                         | SUGAR BINDING PROTEIN               |
| 1LO0 | CATALYTIC RETRO-DIELS-ALDERASE TRANSITION STATE ANALOGUE COMPLEX                                                                                                 | IMMUNE SYSTEM                       |

|      |                                                                                                                                                        |                                       |
|------|--------------------------------------------------------------------------------------------------------------------------------------------------------|---------------------------------------|
| 1LO2 | RETRO-DIELS-ALDERASE CATALYTIC ANTIBODY                                                                                                                | IMMUNE SYSTEM                         |
| 1LO3 | RETRO-DIELS-ALDERASE CATALYTIC ANTIBODY: PRODUCT ANALOGUE                                                                                              | IMMUNE SYSTEM                         |
| 1LO4 | RETRO-DIELS-ALDERASE CATALYTIC ANTIBODY 9D9                                                                                                            | IMMUNE SYSTEM                         |
| 1LO5 | CRYSTAL STRUCTURE OF THE D227A VARIANT OF STAPHYLOCOCCAL ENTEROTOXIN A IN COMPLEX WITH HUMAN MHC CLASS II                                              | IMMUNE SYSTEM/TOXIN                   |
| 1LOA | THREE-DIMENSIONAL STRUCTURES OF COMPLEXES OF LATHYRUS OCHRUS ISOLECTIN I WITH GLUCOSE AND MANNOSE: FINE SPECIFICITY OF THE MONOSACCHARIDE-BINDING SITE | LECTIN                                |
| 1LOB | THREE-DIMENSIONAL STRUCTURES OF COMPLEXES OF LATHYRUS OCHRUS ISOLECTIN I WITH GLUCOSE AND MANNOSE: FINE SPECIFICITY OF THE MONOSACCHARIDE-BINDING SITE | LECTIN                                |
| 1LOC | INTERACTION OF A LEGUME LECTIN WITH TWO COMPONENTS OF THE BACTERIAL CELL WALL                                                                          | LECTIN                                |
| 1LOD | INTERACTION OF A LEGUME LECTIN WITH TWO COMPONENTS OF THE BACTERIAL CELL WALL                                                                          | LECTIN                                |
| 1LOE | X-RAY CRYSTAL STRUCTURE DETERMINATION AND REFINEMENT AT 1.9 ANGSTROMS RESOLUTION OF ISOLECTIN I FROM THE SEEDS OF LATHYRUS OCHRUS                      | LECTIN                                |
| 1LOF | X-RAY STRUCTURE OF A BIANTENNARY OCTASACCHARIDE-LECTIN COMPLEX AT 2.3 ANGSTROMS RESOLUTION                                                             | LECTIN                                |
| 1LOG | X-RAY STRUCTURE OF A (ALPHA-MAN(1-3)BETA-MAN(1-4)GLCNAC)-LECTIN COMPLEX AT 2.1 ANGSTROMS RESOLUTION                                                    | LECTIN                                |
| 1LOT | CRYSTAL STRUCTURE OF THE COMPLEX OF ACTIN WITH VITAMIN D-BINDING PROTEIN                                                                               | TRANSPORT PROTEIN, STRUCTURAL PROTEIN |
| 1LP1 | PROTEIN Z IN COMPLEX WITH AN IN VITRO SELECTED AFFIBODY                                                                                                | IMMUNE SYSTEM                         |
| 1LP9 | XENOREACTIVE COMPLEX AHIII 12.2 TCR BOUND TO P1049/HLA-A2.1                                                                                            | IMMUNE SYSTEM                         |
| 1LPB | THE 2.46 ANGSTROMS RESOLUTION STRUCTURE OF THE PANCREATIC LIPASE COLIPASE COMPLEX INHIBITED BY A C11 ALKYL PHOSPHONATE                                 | HYDROLASE(CARBOXYLIC ESTERASE)        |
| 1LPG | CRYSTAL STRUCTURE OF FXA IN COMPLEX WITH 79.                                                                                                           | HYDROLASE                             |
| 1LPH | LYS(B28)PRO(B29)-HUMAN INSULIN                                                                                                                         | HORMONE                               |
| 1LPK | CRYSTAL STRUCTURE OF FXA IN COMPLEX WITH 125.                                                                                                          | HYDROLASE                             |
| 1LPZ | CRYSTAL STRUCTURE OF FXA IN COMPLEX WITH 41.                                                                                                           | HYDROLASE                             |
| 1LQ8 | CRYSTAL STRUCTURE OF CLEAVED PROTEIN C INHIBITOR                                                                                                       | BLOOD CLOTTING                        |
| 1LQB | CRYSTAL STRUCTURE OF A HYDROXYLATED HIF-1 ALPHA PEPTIDE BOUND TO THE PVHL/ELONGIN-C/ELONGIN-B COMPLEX                                                  | GENE REGULATION                       |
| 1LQD | CRYSTAL STRUCTURE OF FXA IN COMPLEX WITH 45.                                                                                                           | HYDROLASE                             |
| 1LQG | ESCHERICHIA COLI URACIL-DNA GLYCOSYLASE COMPLEX WITH URACIL-DNA GLYCOSYLASE INHIBITOR PROTEIN                                                          | HYDROLASE/HYDROLASE INHIBITOR         |
| 1LQM | ESCHERICHIA COLI URACIL-DNA GLYCOSYLASE COMPLEX WITH URACIL-DNA GLYCOSYLASE INHIBITOR PROTEIN                                                          | HYDROLASE/HYDROLASE INHIBITOR         |



|      |                                                                                                                                            |                             |
|------|--------------------------------------------------------------------------------------------------------------------------------------------|-----------------------------|
| 1LQS | CRYSTAL STRUCTURE OF HUMAN CYTOMEGALOVIRUS IL-10 BOUND TO SOLUBLE HUMAN IL-10R1                                                            | IMMUNE SYSTEM               |
| 1LQV | CRYSTAL STRUCTURE OF THE ENDOTHELIAL PROTEIN C RECEPTOR WITH PHOSPHOLIPID IN THE GROOVE IN COMPLEX WITH GLA DOMAIN OF PROTEIN C.           | BLOOD CLOTING               |
| 1LRW | CRYSTAL STRUCTURE OF METHANOL DEHYDROGENASE FROM P. DENITRIFICANS                                                                          | OXIDOREDUCTASE              |
| 1LSH | LIPID-PROTEIN INTERACTIONS IN LIPOVITELLIN                                                                                                 | LIPID BINDING PROTEIN       |
| 1LT3 | HEAT-LABILE ENTEROTOXIN DOUBLE MUTANT N40C/G166C                                                                                           | ENTEROTOXIN                 |
| 1LT4 | HEAT-LABILE ENTEROTOXIN MUTANT S63K                                                                                                        | ENTEROTOXIN                 |
| 1LT9 | CRYSTAL STRUCTURE OF RECOMBINANT HUMAN FIBRINOGEN FRAGMENT D                                                                               | BLOOD CLOTING               |
| 1LTA | 2.2 ANGSTROMS CRYSTAL STRUCTURE OF E. COLI HEAT-LABILE ENTEROTOXIN (LT) WITH BOUND GALACTOSE                                               | ENTEROTOXIN                 |
| 1LTB | 2.6 ANGSTROMS CRYSTAL STRUCTURE OF PARTIALLY-ACTIVATED E. COLI HEAT-LABILE ENTEROTOXIN (LT)                                                | ENTEROTOXIN                 |
| 1LTG | THE ARG7LYS MUTANT OF HEAT-LABILE ENTEROTOXIN EXHIBITS GREAT FLEXIBILITY OF ACTIVE SITE LOOP 47-56 OF THE A SUBUNIT                        | ENTEROTOXIN                 |
| 1LTI | HEAT-LABILE ENTEROTOXIN (LT-I) COMPLEX WITH T-ANTIGEN                                                                                      | ENTEROTOXIN                 |
| 1LTJ | CRYSTAL STRUCTURE OF RECOMBINANT HUMAN FIBRINOGEN FRAGMENT D WITH THE PEPTIDE LIGANDS GLY-PRO-ARG-PRO-AMIDE AND GLY-HIS-ARG-PRO-AMIDE      | BLOOD CLOTING               |
| 1LTS | REFINED STRUCTURE OF E. COLI HEAT LABILE ENTEROTOXIN, A CLOSE RELATIVE OF CHOLERA TOXIN                                                    | TOXIN                       |
| 1LTT | LACTOSE BINDING TO HEAT-LABILE ENTEROTOXIN REVEALED BY X-RAY CRYSTALLOGRAPHY                                                               | TOXIN                       |
| 1LTX | STRUCTURE OF RAB ESCORT PROTEIN-1 IN COMPLEX WITH RAB GERANYLGERANYL TRANSFERASE AND ISOPRENOID                                            | TRANSFERASE/PROTEIN BINDING |
| 1LUC | BACTERIAL LUCIFERASE                                                                                                                       | FLAVOPROTEIN                |
| 1LUJ | CRYSTAL STRUCTURE OF THE BETA-CATENIN/ICAT COMPLEX                                                                                         | STRUCTURAL PROTEIN          |
| 1LVB | CATALYTICALLY INACTIVE TOBACCO ETCH VIRUS PROTEASE COMPLEXED WITH SUBSTRATE                                                                | VIRAL PROTEIN               |
| 1LVC | CRYSTAL STRUCTURE OF THE ADENYLYL CYCLASE DOMAIN OF ANTHRAX EDEMA FACTOR (EF) IN COMPLEX WITH CALMODULIN AND 2' DEOXY, 3' ANTHRANILOYL ATP | LYASE                       |
| 1LVM | CATALYTICALLY ACTIVE TOBACCO ETCH VIRUS PROTEASE COMPLEXED WITH PRODUCT                                                                    | VIRAL PROTEIN               |
| 1LW0 | CRYSTAL STRUCTURE OF T215Y MUTANT HIV-1 REVERSE TRANSCRIPTASE IN COMPLEX WITH NEVIRAPINE                                                   | TRANSFERASE                 |
| 1LW2 | CRYSTAL STRUCTURE OF T215Y MUTANT HIV-1 REVERSE TRANSCRIPTASE IN COMPLEX WITH 1051U91                                                      | TRANSFERASE                 |
| 1LW6 | CRYSTAL STRUCTURE OF THE COMPLEX OF SUBTILISIN BPN' WITH CHYMOTRYPSIN INHIBITOR 2 AT 1.5 ANGSTROM RESOLUTION                               | HYDROLASE                   |

|      |                                                                                                                                                                                                        |                                      |
|------|--------------------------------------------------------------------------------------------------------------------------------------------------------------------------------------------------------|--------------------------------------|
| 1LWC | CRYSTAL STRUCTURE OF M184V MUTANT HIV-1 REVERSE TRANSCRIPTASE IN COMPLEX WITH NEVIRAPINE                                                                                                               | TRANSFERASE                          |
| 1LWE | CRYSTAL STRUCTURE OF M41L/T215Y MUTANT HIV-1 REVERSE TRANSCRIPTASE (RTMN) IN COMPLEX WITH NEVIRAPINE                                                                                                   | TRANSFERASE                          |
| 1LWF | CRYSTAL STRUCTURE OF A MUTANT HIV-1 REVERSE TRANSCRIPTASE (RTMQ+M184V: M41L/D67N/K70R/M184V/T215Y) IN COMPLEX WITH NEVIRAPINE                                                                          | TRANSFERASE                          |
| 1LWU | CRYSTAL STRUCTURE OF FRAGMENT D FROM LAMPREY FIBRINOGEN COMPLEXED WITH THE PEPTIDE GLY-HIS-ARG-PRO-AMIDE                                                                                               | BLOOD CLOTING                        |
| 1LX5 | CRYSTAL STRUCTURE OF THE BMP7/ACTRII EXTRACELLULAR DOMAIN COMPLEX                                                                                                                                      | GROWTH FACTOR/GROWTH FACTOR RECEPTOR |
| 1LYA | CRYSTAL STRUCTURES OF NATIVE AND INHIBITED FORMS OF HUMAN CATHEPSIN D: IMPLICATIONS FOR LYSOSOMAL TARGETING AND DRUG DESIGN                                                                            | LYSOSOMAL ASPARTIC PROTEASE          |
| 1LYB | CRYSTAL STRUCTURES OF NATIVE AND INHIBITED FORMS OF HUMAN CATHEPSIN D: IMPLICATIONS FOR LYSOSOMAL TARGETING AND DRUG DESIGN                                                                            | LYSOSOMAL ASPARTIC PROTEASE          |
| 1LYW | CATHEPSIN D AT PH 7.5                                                                                                                                                                                  | ASPARTIC PROTEASE                    |
| 1LZQ | CRYSTAL STRUCTURE OF THE COMPLEX OF MUTANT HIV-1 PROTEASE (A71V, V82T, I84V) WITH AN ETHYLENAMINE PEPTIDOMIMETIC INHIBITOR BOC-PHE-PSI[CH <sub>2</sub> CH <sub>2</sub> NH]-PHE-GLU-PHE-NH <sub>2</sub> | HYDROLASE/HYDROLASE INHIBITOR        |
| 1LZW | STRUCTURAL BASIS OF CLPS-MEDIATED SWITCH IN CLPA SUBSTRATE RECOGNITION                                                                                                                                 | CHAPERONE                            |
| 1M05 | HLA B8 IN COMPLEX WITH AN EPSTEIN BARR VIRUS DETERMINANT                                                                                                                                               | IMMUNE SYSTEM                        |
| 1M06 | STRUCTURAL STUDIES OF BACTERIOPHAGE ALPHA3 ASSEMBLY, X-RAY CRYSTALLOGRAPHY                                                                                                                             | VIRUS/DNA                            |
| 1M0B | HIV-1 PROTEASE IN COMPLEX WITH AN ETHYLENEAMINE INHIBITOR                                                                                                                                              | HYDROLASE                            |
| 1M10 | CRYSTAL STRUCTURE OF THE COMPLEX OF GLYCOPROTEIN IB ALPHA AND THE VON WILLEBRAND FACTOR A1 DOMAIN                                                                                                      | BLOOD CLOTING                        |
| 1M18 | LIGAND BINDING ALTERS THE STRUCTURE AND DYNAMICS OF NUCLEOSOMAL DNA                                                                                                                                    | STRUCTURAL PROTEIN/DNA               |
| 1M19 | LIGAND BINDING ALTERS THE STRUCTURE AND DYNAMICS OF NUCLEOSOMAL DNA                                                                                                                                    | STRUCTURAL PROTEIN/DNA               |
| 1M1A | LIGAND BINDING ALTERS THE STRUCTURE AND DYNAMICS OF NUCLEOSOMAL DNA                                                                                                                                    | STRUCTURAL PROTEIN/DNA               |
| 1M1D | TETRAHYMENA GCN5 WITH BOUND BISUBSTRATE ANALOG INHIBITOR                                                                                                                                               | TRANSFERASE                          |
| 1M1E | BETA-CATENIN ARMADILLO REPEAT DOMAIN BOUND TO ICAT                                                                                                                                                     | STRUCTURAL PROTEIN                   |
| 1M1J | CRYSTAL STRUCTURE OF NATIVE CHICKEN FIBRINOGEN WITH TWO DIFFERENT BOUND LIGANDS                                                                                                                        | BLOOD CLOTING                        |
| 1M1K | CO-CRYSTAL STRUCTURE OF AZITHROMYCIN BOUND TO THE 50S RIBOSOMAL SUBUNIT OF HALOARCTIA MARISMORTUI                                                                                                      | RIBOSOME                             |
| 1M1N | NITROGENASE MOFE PROTEIN FROM AZOTOBACTER VINELANDII                                                                                                                                                   | OXIDOREDUCTASE                       |

|      |                                                                                                                                                     |                                     |
|------|-----------------------------------------------------------------------------------------------------------------------------------------------------|-------------------------------------|
| 1M1X | CRYSTAL STRUCTURE OF THE EXTRACELLULAR SEGMENT OF INTEGRIN ALPHA VBETA3 BOUND TO MN2+                                                               | CELL ADHESION                       |
| 1M1Y | CHEMICAL CROSSLINK OF NITROGENASE MOFE PROTEIN AND FE PROTEIN                                                                                       | OXIDOREDUCTASE                      |
| 1M27 | CRYSTAL STRUCTURE OF SAP/FYNH3/SLAM TERNARY COMPLEX                                                                                                 | SIGNALING PROTEIN, TRANSFERASE      |
| 1M20 | CRYSTAL STRUCTURE OF THE SEC23-SAR1 COMPLEX                                                                                                         | PROTEIN TRANSPORT/SIGNALING PROTEIN |
| 1M2T | MISTLETOE LECTIN I FROM VISCUM ALBUM IN COMPLEX WITH ADENINE MONOPHOSPHATE. CRYSTAL STRUCTURE AT 1.9 A RESOLUTION                                   | RIBOSOME INHIBITOR, HYDROLASE       |
| 1M2V | CRYSTAL STRUCTURE OF THE YEAST SEC23/24 HETERODIMER                                                                                                 | PROTEIN TRANSPORT                   |
| 1M2Z | CRYSTAL STRUCTURE OF A DIMER COMPLEX OF THE HUMAN GLUCOCORTICOID RECEPTOR LIGAND-BINDING DOMAIN BOUND TO DEXAMETHASONE AND A TIF2 COACTIVATOR MOTIF | HORMONE/HORMONE ACTIVATOR           |
| 1M34 | NITROGENASE COMPLEX FROM AZOTOBACTER VINELANDII STABILIZED BY ADP-TETRAFLUOROALUMINATE                                                              | OXIDOREDUCTASE                      |
| 1M3X | HOTOSYNTHETIC REACTION CENTER FROM RHODOBACTER SPHAEROIDES                                                                                          | PHOTOSYNTHESIS                      |
| 1M45 | CRYSTAL STRUCTURE OF MLC1P BOUND TO IQ2 OF MYO2P, A CLASS V MYOSIN                                                                                  | CELL CYCLE PROTEIN                  |
| 1M46 | CRYSTAL STRUCTURE OF MLC1P BOUND TO IQ4 OF MYO2P, A CLASS V MYOSIN                                                                                  | CELL CYCLE PROTEIN                  |
| 1M4H | CRYSTAL STRUCTURE OF BETA-SECRETASE COMPLEXED WITH INHIBITOR OM00-3                                                                                 | HYDROLASE                           |
| 1M4U | CRYSTAL STRUCTURE OF BONE MORPHOGENETIC PROTEIN-7 (BMP-7) IN COMPLEX WITH THE SECRETED ANTAGONIST NOGGIN                                            | HORMONE/GROWTH FACTOR               |
| 1M56 | STRUCTURE OF CYTOCHROME C OXIDASE FROM RHODOBACTOR SPHAEROIDES (WILD TYPE)                                                                          | OXIDOREDUCTASE                      |
| 1M5A | CRYSTAL STRUCTURE OF 2-CO(2+)-INSULIN AT 1.2A RESOLUTION                                                                                            | HORMONE/GROWTH FACTOR               |
| 1M5N | CRYSTAL STRUCTURE OF HEAT REPEATS (1-11) OF IMPORTIN B BOUND TO THE NON-CLASSICAL NLS(67-94) OF PTHRP                                               | PROTEIN TRANSPORT                   |
| 1M63 | CRYSTAL STRUCTURE OF CALCINEURIN-CYCLOPHILIN-CYCLOSPORIN SHOWS COMMON BUT DISTINCT RECOGNITION OF IMMUNOPHILIN-DRUG COMPLEXES                       | HYDROLASE/ISOMERASE                 |
| 1M60 | CRYSTAL STRUCTURE OF HLA B*4402 IN COMPLEX WITH HLA DPA*0201 PEPTIDE                                                                                | IMMUNE SYSTEM                       |
| 1M6V | CRYSTAL STRUCTURE OF THE G359F (SMALL SUBUNIT) POINT MUTANT OF CARBAMOYL PHOSPHATE SYNTHETASE                                                       | LIGASE                              |
| 1M6X | FLPE-HOLLIDAY JUNCTION COMPLEX                                                                                                                      | LIGASE, LYASE/DNA                   |
| 1M72 | CRYSTAL STRUCTURE OF CASPASE-1 FROM SPODOPTERA FRUGIPERDA                                                                                           | HYDROLASE                           |
| 1M7D | CRYSTAL STRUCTURE OF A MONOCLONAL FAB SPECIFIC FOR SHIGELLA FLEXNERI Y LIPOPOLYSACCHARIDE COMPLEXED WITH A TRISACCHARIDE                            | IMMUNE SYSTEM                       |
| 1M7E | CRYSTAL STRUCTURE OF THE PHOSPHOTYROSINE BINDING DOMAIN(PTB) OF MOUSE DISABLED 2(DAB2):IMPLICATIONS FOR                                             | SIGNALING PROTEIN                   |

## REELING SIGNALING

|      |                                                                                                                                                                                  |                                       |
|------|----------------------------------------------------------------------------------------------------------------------------------------------------------------------------------|---------------------------------------|
| 1M7I | CRYSTAL STRUCTURE OF A MONOCLONAL FAB SPECIFIC FOR SHIGELLA FLEXNERI Y LIPOPOLYSACCHARIDE COMPLEXED WITH A PENTASACCHARIDE                                                       | IMMUNE SYSTEM                         |
| 1M8Q | MOLECULAR MODELS OF AVERAGED RIGOR CROSSBRIDGES FROM TOMOGRAMS OF INSECT FLIGHT MUSCLE                                                                                           | CONTRACTILE PROTEIN                   |
| 1M90 | CO-CRYSTAL STRUCTURE OF CCA-PHE-CAPROIC ACID-BIOTIN AND SPARSOMYCIN BOUND TO THE 50S RIBOSOMAL SUBUNIT                                                                           | RIBOSOME                              |
| 1M93 | 1.65 Å STRUCTURE OF CLEAVED VIRAL SERPIN CRMA                                                                                                                                    | VIRAL PROTEIN                         |
| 1M9C | X-RAY CRYSTAL STRUCTURE OF CYCLOPHILIN A/HIV-1 CA N-TERMINAL DOMAIN (1-146) M-TYPE COMPLEX.                                                                                      | ISOMERASE/VIRAL PROTEIN               |
| 1M9D | X-RAY CRYSTAL STRUCTURE OF CYCLOPHILIN A/HIV-1 CA N-TERMINAL DOMAIN (1-146) O-TYPE CHIMERA COMPLEX.                                                                              | ISOMERASE/VIRAL PROTEIN               |
| 1M9E | X-RAY CRYSTAL STRUCTURE OF CYCLOPHILIN A/HIV-1 CA N-TERMINAL DOMAIN (1-146) M-TYPE H87A COMPLEX.                                                                                 | ISOMERASE/VIRAL PROTEIN               |
| 1M9F | X-RAY CRYSTAL STRUCTURE OF CYCLOPHILIN A/HIV-1 CA N-TERMINAL DOMAIN (1-146) M-TYPE H87A,A88M COMPLEX.                                                                            | ISOMERASE/VIRAL PROTEIN               |
| 1M9P | CRYSTALLINE HUMAN CARBONMONOXY HEMOGLOBIN C EXHIBITS THE R2 QUATERNARY STATE AT NEUTRAL PH IN THE PRESENCE OF POLYETHYLENE GLYCOL: THE 2.1 ÅNGSTROM RESOLUTION CRYSTAL STRUCTURE | OXYGEN STORAGE/TRANSPORT              |
| 1M9X | X-RAY CRYSTAL STRUCTURE OF CYCLOPHILIN A/HIV-1 CA N-TERMINAL DOMAIN (1-146) M-TYPE H87A,A88M,G89A COMPLEX.                                                                       | ISOMERASE/VIRAL PROTEIN               |
| 1M9Y | X-RAY CRYSTAL STRUCTURE OF CYCLOPHILIN A/HIV-1 CA N-TERMINAL DOMAIN (1-146) M-TYPE H87A,G89A COMPLEX.                                                                            | ISOMERASE/VIRAL PROTEIN               |
| 1MA3 | STRUCTURE OF A SIR2 ENZYME BOUND TO AN ACETYLATED P53 PEPTIDE                                                                                                                    | PROTEIN BINDING, TRANSCRIPTION        |
| 1MA9 | CRYSTAL STRUCTURE OF THE COMPLEX OF HUMAN VITAMIN D BINDING PROTEIN AND RABBIT MUSCLE ACTIN                                                                                      | TRANSPORT PROTEIN/CONTRACTILE PROTEIN |
| 1MAB | RAT LIVER F1-ATPASE                                                                                                                                                              | HYDROLASE                             |
| 1MAH | FASCICULIN2-MOUSE ACETYLCHOLINESTERASE COMPLEX                                                                                                                                   | COMPLEX (HYDROLASE/TOXIN)             |
| 1MAM | CRYSTAL STRUCTURE TO 2.45 Å RESOLUTION OF A MONOCLONAL FAB SPECIFIC FOR THE BRUCELLA A CELL WALL POLYSACCHARIDE ANTIGEN                                                          | IMMUNOGLOBULIN                        |
| 1MBU | CRYSTAL STRUCTURE ANALYSIS OF CLPSN HETERODIMER                                                                                                                                  | PROTEIN BINDING                       |
| 1MBV | CRYSTAL STRUCTURE ANALYSIS OF CLPSN HETERODIMER TETRAGONAL FORM                                                                                                                  | PROTEIN BINDING                       |
| 1MBX | CRYSTAL STRUCTURE ANALYSIS OF CLPSN WITH TRANSITION METAL ION BOUND                                                                                                              | PROTEIN BINDING                       |
| 1MCB | PRINCIPLES AND PITFALLS IN DESIGNING SITE DIRECTED PEPTIDE LIGANDS                                                                                                               | IMMUNOGLOBULIN                        |
| 1MCC | PRINCIPLES AND PITFALLS IN DESIGNING SITE DIRECTED PEPTIDE LIGANDS                                                                                                               | IMMUNOGLOBULIN                        |

|      |                                                                                                                                                                           |                                      |
|------|---------------------------------------------------------------------------------------------------------------------------------------------------------------------------|--------------------------------------|
| 1MCD | PRINCIPLES AND PITFALLS IN DESIGNING SITE DIRECTED PEPTIDE LIGANDS                                                                                                        | IMMUNOGLOBULIN                       |
| 1MCE | PRINCIPLES AND PITFALLS IN DESIGNING SITE DIRECTED PEPTIDE LIGANDS                                                                                                        | IMMUNOGLOBULIN                       |
| 1MCF | PRINCIPLES AND PITFALLS IN DESIGNING SITE DIRECTED PEPTIDE LIGANDS                                                                                                        | IMMUNOGLOBULIN                       |
| 1MCH | PRINCIPLES AND PITFALLS IN DESIGNING SITE DIRECTED PEPTIDE LIGANDS                                                                                                        | IMMUNOGLOBULIN                       |
| 1MCI | PRINCIPLES AND PITFALLS IN DESIGNING SITE DIRECTED PEPTIDE LIGANDS                                                                                                        | IMMUNOGLOBULIN                       |
| 1MCJ | PRINCIPLES AND PITFALLS IN DESIGNING SITE DIRECTED PEPTIDE LIGANDS                                                                                                        | IMMUNOGLOBULIN                       |
| 1MCK | PRINCIPLES AND PITFALLS IN DESIGNING SITE DIRECTED PEPTIDE LIGANDS                                                                                                        | IMMUNOGLOBULIN                       |
| 1MCL | PRINCIPLES AND PITFALLS IN DESIGNING SITE DIRECTED PEPTIDE LIGANDS                                                                                                        | IMMUNOGLOBULIN                       |
| 1MCN | PRINCIPLES AND PITFALLS IN DESIGNING SITE DIRECTED PEPTIDE LIGANDS                                                                                                        | IMMUNOGLOBULIN                       |
| 1MCO | THREE-DIMENSIONAL STRUCTURE OF A HUMAN IMMUNOGLOBULIN WITH A HINGE DELETION                                                                                               | IMMUNOGLOBULIN                       |
| 1MCP | PHOSPHOCHOLINE BINDING IMMUNOGLOBULIN FAB MC/PC603. AN X-RAY DIFFRACTION STUDY AT 2.7 ANGSTROMS                                                                           | IMMUNOGLOBULIN                       |
| 1MCQ | PRINCIPLES AND PITFALLS IN DESIGNING SITE DIRECTED PEPTIDE LIGANDS                                                                                                        | IMMUNOGLOBULIN                       |
| 1MCR | PRINCIPLES AND PITFALLS IN DESIGNING SITE DIRECTED PEPTIDE LIGANDS                                                                                                        | IMMUNOGLOBULIN                       |
| 1MCS | PRINCIPLES AND PITFALLS IN DESIGNING SITE DIRECTED PEPTIDE LIGANDS                                                                                                        | IMMUNOGLOBULIN                       |
| 1MCT | THE REFINED 1.6 ANGSTROMS RESOLUTION CRYSTAL STRUCTURE OF THE COMPLEX FORMED BETWEEN PORCINE BETA-TRYPSIN AND MCTI-A, A TRYPSIN INHIBITOR OF SQUASH FAMILY                | COMPLEX(PROTEINASE/INHIBITOR)        |
| 1MCW | THREE-DIMENSIONAL STRUCTURE OF A HYBRID LIGHT CHAIN DIMER. PROTEIN ENGINEERING OF A BINDING CAVITY                                                                        | IMMUNOGLOBULIN                       |
| 1MDA | CRYSTAL STRUCTURE OF AN ELECTRON-TRANSFER COMPLEX BETWEEN METHYLAMINE DEHYDROGENASE AND AMICYANIN                                                                         | ELECTRON TRANSPORT                   |
| 1MDI | HIGH RESOLUTION SOLUTION NMR STRUCTURE OF MIXED DISULFIDE INTERMEDIATE BETWEEN MUTANT HUMAN THIOREDOXIN AND A 13 RESIDUE PEPTIDE COMPRISING ITS TARGET SITE IN HUMAN NFKB | COMPLEX (ELECTRON TRANSPORT/PEPTIDE) |
| 1MDM | INHIBITED FRAGMENT OF ETS-1 AND PAIRED DOMAIN OF PAX5 BOUND TO DNA                                                                                                        | TRANSCRIPTION/DNA                    |
| 1MDU | CRYSTAL STRUCTURE OF THE CHICKEN ACTIN TRIMER COMPLEXED WITH HUMAN GELSOLIN SEGMENT 1 (GS-1)                                                                              | STRUCTURAL PROTEIN                   |
| 1MDY | CRYSTAL STRUCTURE OF MYOD BHLH DOMAIN BOUND TO DNA: PERSPECTIVES ON DNA RECOGNITION AND IMPLICATIONS FOR TRANSCRIPTIONAL ACTIVATION                                       | TRANSCRIPTION/DNA                    |

|      |                                                                                                                                                                                                                                 |                                      |
|------|---------------------------------------------------------------------------------------------------------------------------------------------------------------------------------------------------------------------------------|--------------------------------------|
| 1MEE | THE COMPLEX BETWEEN THE SUBTILISIN FROM A MESOPHILIC BACTERIUM AND THE LEECH INHIBITOR EGLIN-C                                                                                                                                  | COMPLEX(SERINE PROTEINASE-INHIBITOR) |
| 1MEL | CRYSTAL STRUCTURE OF A CAMEL SINGLE-DOMAIN VH ANTIBODY FRAGMENT IN COMPLEX WITH LYSOZYME                                                                                                                                        | COMPLEX (ANTIBODY/ANTIGEN)           |
| 1MEX | ANTIBODY CATALYSIS OF A BIMOLECULAR CYCLOADDITION REACTION                                                                                                                                                                      | IMMUNE SYSTEM                        |
| 1MF2 | ANTI HIV1 PROTEASE FAB COMPLEX                                                                                                                                                                                                  | IMMUNOGLOBULIN                       |
| 1MF4 | STRUCTURE-BASED DESIGN OF POTENT AND SELECTIVE INHIBITORS OF PHOSPHOLIPASE A2: CRYSTAL STRUCTURE OF THE COMPLEX FORMED BETWEEN PHOSPHOLIPASE A2 FROM NAJA NAJA SAGITTIFERA AND A DESIGNED PEPTIDE INHIBITOR AT 1.9 Å RESOLUTION | HYDROLASE                            |
| 1MF8 | CRYSTAL STRUCTURE OF HUMAN CALCINEURIN COMPLEXED WITH CYCLOSPORIN A AND HUMAN CYCLOPHILIN                                                                                                                                       | HYDROLASE, LIGASE                    |
| 1MFB | HIGH RESOLUTION STRUCTURES OF ANTIBODY FAB FRAGMENT COMPLEXED WITH CELL-SURFACE OLIGOSACCHARIDE OF PATHOGENIC SALMONELLA                                                                                                        | IMMUNOGLOBULIN                       |
| 1MFC | HIGH RESOLUTION STRUCTURES OF ANTIBODY FAB FRAGMENT COMPLEXED WITH CELL-SURFACE OLIGOSACCHARIDE OF PATHOGENIC SALMONELLA                                                                                                        | IMMUNOGLOBULIN                       |
| 1MFD | THE SOLUTION STRUCTURE OF A TRISACCHARIDE-ANTIBODY COMPLEX: COMPARISON OF NMR MEASUREMENTS WITH A CRYSTAL STRUCTURE                                                                                                             | IMMUNOGLOBULIN                       |
| 1MFE | RECOGNITION OF A CELL-SURFACE OLIGO-SACCHARIDE OF PATHOGENIC SALMONELLA BY AN ANTIBODY FAB FRAGMENT                                                                                                                             | IMMUNOGLOBULIN                       |
| 1MFG | THE STRUCTURE OF ERBIN PDZ DOMAIN BOUND TO THE CARBOXY-TERMINAL TAIL OF THE ERBB2 RECEPTOR                                                                                                                                      | SIGNALING PROTEIN                    |
| 1MFL | THE STRUCTURE OF ERBIN PDZ DOMAIN BOUND TO THE CARBOXY-TERMINAL TAIL OF THE ERBB2 RECEPTOR                                                                                                                                      | SIGNALING PROTEIN                    |
| 1MFQ | CRYSTAL STRUCTURE ANALYSIS OF A TERNARY S-DOMAIN COMPLEX OF HUMAN SIGNAL RECOGNITION PARTICLE                                                                                                                                   | SIGNALING PROTEIN/RNA                |
| 1MG2 | MUTATION OF ALPHA PHE55 OF METHYLAMINE DEHYDROGENASE ALTERS THE REORGANIZATION ENERGY AND ELECTRONIC COUPLING FOR ITS ELECTRON TRANSFER REACTION WITH AMICYANIN                                                                 | OXIDOREDUCTASE                       |
| 1MG3 | MUTATION OF ALPHA PHE55 OF METHYLAMINE DEHYDROGENASE ALTERS THE REORGANIZATION ENERGY AND ELECTRONIC COUPLING FOR ITS ELECTRON TRANSFER REACTION WITH AMICYANIN                                                                 | OXIDOREDUCTASE                       |
| 1MG9 | THE STRUCTURAL BASIS OF CLPS-MEDIATED SWITCH IN CLPA SUBSTRATE RECOGNITION                                                                                                                                                      | CHAPERONE                            |
| 1MH2 | CRYSTAL STRUCTURE OF A ZINC CONTAINING DIMER OF PHOSPHOLIPASE A2 FROM THE VENOM OF INDIAN COBRA (NAJA NAJA SAGITTIFERA)                                                                                                         | HYDROLASE                            |
| 1MH5 | THE STRUCTURE OF THE COMPLEX OF THE FAB FRAGMENT OF THE ESTEROLYTIC ANTIBODY MS6-164 AND A TRANSITION-STATE ANALOG                                                                                                              | IMMUNE SYSTEM                        |
| 1MHC | MODEL OF MHC CLASS I H2-M3 WITH NONAPEPTIDE FROM RAT ND1 REFINED AT 2.3 ÅNGSTROMS RESOLUTION                                                                                                                                    | HISTOCOMPATIBILITY ANTIGEN/PEPTIDE   |
| 1MHE | THE HUMAN NON-CLASSICAL MAJOR HISTOCOMPATIBILITY COMPLEX MOLECULE HLA-E                                                                                                                                                         | MAJOR HISTOCOMPATIBILITY COMPLEX     |

|      |                                                                                                                                                           |                                       |
|------|-----------------------------------------------------------------------------------------------------------------------------------------------------------|---------------------------------------|
| 1MHH | ANTIBODY-ANTIGEN COMPLEX                                                                                                                                  | IMMUNE SYSTEM                         |
| 1MHL | CRYSTAL STRUCTURE OF HUMAN MYELOPEROXIDASE ISOFORM C CRYSTALLIZED IN SPACE GROUP P2(1) AT PH 5.5 AND 20 DEG C                                             | MYELOPEROXIDASE                       |
| 1MHM | CRYSTAL STRUCTURE OF S-ADENOSYLMETHIONINE DECARBOXYLASE FROM POTATO                                                                                       | LYASE                                 |
| 1MHP | CRYSTAL STRUCTURE OF A CHIMERIC ALPHA1 INTEGRIN I-DOMAIN IN COMPLEX WITH THE FAB FRAGMENT OF A HUMANIZED NEUTRALIZING ANTIBODY                            | IMMUNE SYSTEM                         |
| 1MHW | DESIGN OF NON-COVALENT INHIBITORS OF HUMAN CATHEPSIN L. FROM THE 96-RESIDUE PROREGION TO OPTIMIZED TRIPEPTIDES                                            | HYDROLASE                             |
| 1MHY | METHANE MONOOXYGENASE HYDROXYLASE                                                                                                                         | OXIDOREDUCTASE                        |
| 1MHZ | METHANE MONOOXYGENASE HYDROXYLASE                                                                                                                         | OXIDOREDUCTASE                        |
| 1MI5 | THE CRYSTAL STRUCTURE OF LC13 TCR IN COMPLEX WITH HLAB8-EBV PEPTIDE COMPLEX                                                                               | IMMUNE SYSTEM                         |
| 1MIE | CRYSTAL STRUCTURE OF THE FAB FRAGMENT OF ESTEROLYTIC ANTIBODY MS5-393                                                                                     | IMMUNE SYSTEM                         |
| 1MIM | IGG FAB FRAGMENT (CD25-BINDING)                                                                                                                           | IMMUNOGLOBULIN                        |
| 1MIO | X-RAY CRYSTAL STRUCTURE OF THE NITROGENASE MOLYBDENUM-IRON PROTEIN FROM CLOSTRIDIUM PASTEURIANUM AT 3.0 ANGSTROMS RESOLUTION                              | MOLYBDENUM-IRON PROTEIN               |
| 1MIU | STRUCTURE OF A BRCA2-DSS1 COMPLEX                                                                                                                         | GENE REGULATION/ANTITUMOR PROTEIN     |
| 1MIZ | CRYSTAL STRUCTURE OF AN INTEGRIN BETA3-TALIN CHIMERA                                                                                                      | STRUCTURAL PROTEIN                    |
| 1MJ7 | CRYSTAL STRUCTURE OF THE COMPLEX OF THE FAB FRAGMENT OF ESTEROLYTIC ANTIBODY MS5-393 AND A TRANSITION-STATE ANALOG                                        | IMMUNE SYSTEM                         |
| 1MJ8 | HIGH RESOLUTION CRYSTAL STRUCTURE OF THE FAB FRAGMENT OF THE ESTEROLYTIC ANTIBODY MS6-126                                                                 | IMMUNE SYSTEM                         |
| 1MJE | STRUCTURE OF A BRCA2-DSS1-SSDNA COMPLEX                                                                                                                   | GENE REGULATION/ANTITUMOR PROTEIN/DNA |
| 1MJG | CRYSTAL STRUCTURE OF BIFUNCTIONAL CARBON MONOXIDE DEHYDROGENASE/ACETYL-COA SYNTHASE(CODH/ACS) FROM MOORELLA THERMOACETICA (F. CLOSTRIDIUM THERMOACETICUM) | OXIDOREDUCTASE                        |
| 1MJJ | HIGH RESOLUTION CRYSTAL STRUCTURE OF THE COMPLEX OF THE FAB FRAGMENT OF ESTEROLYTIC ANTIBODY MS6-12 AND A TRANSITION-STATE ANALOG                         | IMMUNE SYSTEM                         |
| 1MJU | 1.22 ANGSTROM RESOLUTION CRYSTAL STRUCTURE OF THE FAB FRAGMENT OF ESTEROLYTIC ANTIBODY MS6-12                                                             | IMMUNE SYSTEM                         |
| 1MK2 | SMAD3 SBD COMPLEX                                                                                                                                         | TRANSCRIPTION                         |
| 1MK7 | CRYSTAL STRUCTURE OF AN INTEGRIN BETA3-TALIN CHIMERA                                                                                                      | STRUCTURAL PROTEIN                    |
| 1MK9 | CRYSTAL STRUCTURE OF AN INTEGRIN BETA3-TALIN CHIMERA                                                                                                      | STRUCTURAL PROTEIN                    |
| 1MKO | A FOURTH QUATERNARY STRUCTURE OF HUMAN HEMOGLOBIN A AT 2.18 A RESOLUTION                                                                                  | OXYGEN STORAGE/TRANSPORT              |
| 1MKW | THE CO-CRYSTAL STRUCTURE OF UNLIGANDED BOVINE ALPHA-                                                                                                      | COMPLEX (BLOOD COAGULATION/PROENZYME) |

|      |                                                                                                                                                                                                         |                                       |
|------|---------------------------------------------------------------------------------------------------------------------------------------------------------------------------------------------------------|---------------------------------------|
|      | THROMBIN AND PRETHROMBIN-2: MOVEMENT OF THE YPPW SEGMENT AND ACTIVE SITE RESIDUES UPON LIGAND BINDING                                                                                                   |                                       |
| 1MKX | THE CO-CRYSTAL STRUCTURE OF UNLIGANDED BOVINE ALPHA-THROMBIN AND PRETHROMBIN-2: MOVEMENT OF THE YPPW SEGMENT AND ACTIVE SITE RESIDUES UPON LIGAND BINDING                                               | COMPLEX (BLOOD COAGULATION/PROENZYME) |
| 1ML0 | VIRAL CHEMOKINE BINDING PROTEIN M3 FROM MURINE GAMMAHERPESVIRUS68 IN COMPLEX WITH THE P8A VARIANT OF CC-CHEMOKINE MCP-1                                                                                 | IMMUNE SYSTEM                         |
| 1MLB | MONOCLONAL ANTIBODY FAB D44.1 RAISED AGAINST CHICKEN EGG-WHITE LYSOZYME                                                                                                                                 | IMMUNOGLOBULIN                        |
| 1MLC | MONOCLONAL ANTIBODY FAB D44.1 RAISED AGAINST CHICKEN EGG-WHITE LYSOZYME COMPLEXED WITH LYSOZYME                                                                                                         | COMPLEX (ANTIBODY/ANTIGEN)            |
| 1MMF | CRYSTAL STRUCTURE OF SUBSTRATE FREE FORM OF GLYCEROL DEHYDRATASE                                                                                                                                        | LYASE                                 |
| 1MMO | CRYSTAL STRUCTURE OF A BACTERIAL NON-HAEM IRON HYDROXYLASE THAT CATALYSES THE BIOLOGICAL OXIDATION OF METHANE                                                                                           | OXIDOREDUCTASE (MONOOXYGENASE)        |
| 1MNF | DOMAIN MOTIONS IN GROEL UPON BINDING OF AN OLIGOPEPTIDE                                                                                                                                                 | CHAPERONE                             |
| 1MNM | YEAST MATA1/MCM1/DNA TERNARY TRANSCRIPTION COMPLEX CRYSTAL STRUCTURE                                                                                                                                    | TRANSCRIPTION/DNA                     |
| 1MO1 | CRYSTAL STRUCTURE AT 1.8 ANGSTROMS OF SELENO METHIONYLED CRH, THE BACILLUS SUBTILIS CATABOLITE REPRESSION CONTAINING PROTEIN CRH REVEALS AN UNEXPECTED SWAPPING DOMAIN AS AN UNTERTWINNED DIMER         | TRANSPORT PROTEIN                     |
| 1MOX | CRYSTAL STRUCTURE OF HUMAN EPIDERMAL GROWTH FACTOR RECEPTOR (RESIDUES 1-501) IN COMPLEX WITH TGF-ALPHA                                                                                                  | TRANSFERASE/GROWTH FACTOR             |
| 1MPA | BACTERICIDAL ANTIBODY AGAINST NEISSERIA MENINGITIDIS                                                                                                                                                    | COMPLEX (IMMUNOGLOBULIN/PEPTIDE)      |
| 1MPJ | X-RAY CRYSTALLOGRAPHIC STUDIES ON HEXAMERIC INSULINS IN THE PRESENCE OF HELIX-STABILIZING AGENTS, THIOCYANATE, METHYLPARABEN AND PHENOL                                                                 | HORMONE                               |
| 1MPS | PHOTOSYNTHETIC REACTION CENTER MUTANT WITH PHE M 197 REPLACED WITH ARG AND TYR M 177 REPLACED WITH PHE (CHAIN M, Y177F, F197R)                                                                          | PHOTOSYNTHETIC REACTION CENTER        |
| 1MQ5 | CRYSTAL STRUCTURE OF 3-CHLORO-N-[4-CHLORO-2-[[4-CHLOROPHENYL)AMINO]CARBONYL]PHENYL]-4-[[4-METHYL-1-PIPERAZINYLMETHYL]-2-THIOPHENECARBOXAMIDE COMPLEXED WITH HUMAN FACTOR XA                             | BLOOD CLOTTING                        |
| 1MQ6 | CRYSTAL STRUCTURE OF 3-CHLORO-N-[4-CHLORO-2-[[5-CHLORO-2-PYRIDINYLAMINO]CARBONYL]-6-METHOXYPHENYL]-4-[[4,5-DIHYDRO-2-OXAZOLYL)METHYLAMINO]METHYL]-2-THIOPHENECARBOXAMIDE COMPLEXED WITH HUMAN FACTOR XA | BLOOD CLOTTING                        |
| 1MQ8 | CRYSTAL STRUCTURE OF ALPHA I DOMAIN IN COMPLEX WITH ICAM-1                                                                                                                                              | IMMUNE SYSTEM                         |
| 1MQL | BHA OF UKR/63                                                                                                                                                                                           | VIRAL PROTEIN                         |
| 1MQM | BHA/LSTA                                                                                                                                                                                                | VIRAL PROTEIN                         |
| 1MQN | BHA/LSTC                                                                                                                                                                                                | VIRAL PROTEIN                         |
| 1MQS | CRYSTAL STRUCTURE OF SLY1P IN COMPLEX WITH AN N-TERMINAL                                                                                                                                                | ENDOCYTOSIS/EXOCYTOSIS                |



## PEPTIDE OF SED5P

|      |                                                                                                                                                                            |                               |
|------|----------------------------------------------------------------------------------------------------------------------------------------------------------------------------|-------------------------------|
| 1MQT | SWINE VESICULAR DISEASE VIRUS COAT PROTEIN                                                                                                                                 | VIRUS                         |
| 1MR1 | CRYSTAL STRUCTURE OF A SMAD4-SKI COMPLEX                                                                                                                                   | SIGNALING PROTEIN             |
| 1MRC | PREPARATION, CHARACTERIZATION AND CRYSTALLIZATION OF AN ANTIBODY FAB FRAGMENT THAT RECOGNIZES RNA. CRYSTAL STRUCTURES OF NATIVE FAB AND THREE FAB-MONONUCLEOTIDE COMPLEXES | IMMUNOGLOBULIN                |
| 1MRD | PREPARATION, CHARACTERIZATION AND CRYSTALLIZATION OF AN ANTIBODY FAB FRAGMENT THAT RECOGNIZES RNA. CRYSTAL STRUCTURES OF NATIVE FAB AND THREE FAB-MONONUCLEOTIDE COMPLEXES | IMMUNOGLOBULIN                |
| 1MRE | PREPARATION, CHARACTERIZATION AND CRYSTALLIZATION OF AN ANTIBODY FAB FRAGMENT THAT RECOGNIZES RNA. CRYSTAL STRUCTURES OF NATIVE FAB AND THREE FAB-MONONUCLEOTIDE COMPLEXES | IMMUNOGLOBULIN                |
| 1MRF | PREPARATION, CHARACTERIZATION AND CRYSTALLIZATION OF AN ANTIBODY FAB FRAGMENT THAT RECOGNIZES RNA. CRYSTAL STRUCTURES OF NATIVE FAB AND THREE FAB-MONONUCLEOTIDE COMPLEXES | IMMUNOGLOBULIN                |
| 1MRO | METHYL-COENZYME M REDUCTASE                                                                                                                                                | METHANOGENESIS                |
| 1MSO | T6 HUMAN INSULIN AT 1.0 Å RESOLUTION                                                                                                                                       | HORMONE/GROWTH FACTOR         |
| 1MT1 | THE CRYSTAL STRUCTURE OF PYRUVOYL-DEPENDENT ARGININE DECARBOXYLASE FROM METHANOCOCCUS JANNASCHII                                                                           | LYASE                         |
| 1MT7 | VIABILITY OF A DRUG-RESISTANT HIV-1 PROTEASE MUTANT: STRUCTURAL INSIGHTS FOR BETTER ANTIVIRAL THERAPY                                                                      | HYDROLASE/HYDROLASE INHIBITOR |
| 1MT8 | VIABILITY OF A DRUG-RESISTANT HIV-1 PROTEASE MUTANT: STRUCTURAL INSIGHTS FOR BETTER ANTIVIRAL THERAPY                                                                      | HYDROLASE/HYDROLASE INHIBITOR |
| 1MT9 | VIABILITY OF A DRUG-RESISTANT HIV-1 PROTEASE MUTANT: STRUCTURAL INSIGHTS FOR BETTER ANTIVIRAL THERAPY                                                                      | HYDROLASE                     |
| 1MTN | BOVINE ALPHA-CHYMOTRYPSIN:BPTI CRYSTALLIZATION                                                                                                                             | COMPLEX (HYDROLASE/INHIBITOR) |
| 1MTP | THE X-RAY CRYSTAL STRUCTURE OF A SERPIN FROM A THERMOPHILIC PROKARYOTE                                                                                                     | STRUCTURAL GENOMICS           |
| 1MTY | METHANE MONOOXYGENASE HYDROXYLASE FROM METHYLOCOCCUS CAPSULATUS (BATH)                                                                                                     | MONOOXYGENASE                 |
| 1MU2 | CRYSTAL STRUCTURE OF HIV-2 REVERSE TRANSCRIPTASE                                                                                                                           | TRANSFERASE                   |
| 1MU6 | CRYSTAL STRUCTURE OF THROMBIN IN COMPLEX WITH L-378,622                                                                                                                    | HYDROLASE/BLOOD CLOTTING      |
| 1MU8 | THROMBIN-HIRUGEN_L-378,650                                                                                                                                                 | HYDROLASE/BLOOD CLOTTING      |
| 1MUE | THROMBIN-HIRUGEN-L405,426                                                                                                                                                  | HYDROLASE/BLOOD CLOTTING      |
| 1MUJ | CRYSTAL STRUCTURE OF MURINE CLASS II MHC I-AB IN COMPLEX WITH A HUMAN CLIP PEPTIDE                                                                                         | IMMUNE SYSTEM                 |
| 1MV9 | CRYSTAL STRUCTURE OF THE HUMAN RXR ALPHA LIGAND BINDING DOMAIN BOUND TO THE EICOSANOID DHA (DOCOSA HEXAENOIC ACID) AND A COACTIVATOR PEPTIDE                               | TRANSCRIPTION                 |

|      |                                                                                                                                                                                                     |                                   |
|------|-----------------------------------------------------------------------------------------------------------------------------------------------------------------------------------------------------|-----------------------------------|
| 1MVC | CRYSTAL STRUCTURE OF THE HUMAN RXR ALPHA LIGAND BINDING DOMAIN BOUND TO THE SYNTHETIC AGONIST COMPOUND BMS 649 AND A COACTIVATOR PEPTIDE                                                            | TRANSCRIPTION                     |
| 1MVF | MAZE ADDICTION ANTIDOTE                                                                                                                                                                             | IMMUNE SYSTEM                     |
| 1MVU | SINGLE CHAIN FV OF C219 HEAVY CHAIN V101L MUTANT IN COMPLEX WITH SYNTHETIC EPITOPE PEPTIDE                                                                                                          | IMMUNE SYSTEM                     |
| 1MVW | MOLECULAR MODELS OF AVERAGED RIGOR CROSSBRIDGES FROM TOMOGRAMS OF INSECT FLIGHT MUSCLE                                                                                                              | CONTRACTILE PROTEIN               |
| 1MWA | 2C/H-2KBM3/DEV8 ALLOGENEIC COMPLEX                                                                                                                                                                  | IMMUNE SYSTEM                     |
| 1MXE | STRUCTURE OF THE COMPLEX OF CALMODULIN WITH THE TARGET SEQUENCE OF CAMK1                                                                                                                            | METAL BINDING PROTEIN             |
| 1MYP | X-RAY CRYSTAL STRUCTURE OF CANINE MYELOPEROXIDASE AT 3 ANGSTROMS RESOLUTION                                                                                                                         | MYELOPEROXIDASE                   |
| 1MZ8 | CRYSTAL STRUCTURES OF THE NUCLEASE DOMAIN OF COLE7/IM7 IN COMPLEX WITH A PHOSPHATE ION AND A ZINC ION                                                                                               | TOXIN, HYDROLASE/PROTEIN BINDING  |
| 1MZC | CO-CRYSTAL STRUCTURE OF HUMAN FARNESYLTRANSFERASE WITH FARNESYLDIPHOSPHATE AND INHIBITOR COMPOUND 33A                                                                                               | TRANSFERASE                       |
| 1MZN | CRYSTAL STRUCTURE AT 1.9 ANGSTROMS RESOLUTION OF THE HOMODIMER OF HUMAN RXR ALPHA LIGAND BINDING DOMAIN BOUND TO THE SYNTHETIC AGONIST COMPOUND BMS 649 AND A COACTIVATOR PEPTIDE                   | TRANSCRIPTION                     |
| 1MZW | CRYSTAL STRUCTURE OF A U4/U6 SNRNP COMPLEX BETWEEN HUMAN SPLICEOSOMAL CYCLOPHILIN H AND A U4/U6-60K PEPTIDE                                                                                         | ISOMERASE                         |
| 1N0W | CRYSTAL STRUCTURE OF A RAD51-BRCA2 BRC REPEAT COMPLEX                                                                                                                                               | GENE REGULATION/ANTITUMOR PROTEIN |
| 1N0X | CRYSTAL STRUCTURE OF A BROADLY NEUTRALIZING ANTI-HIV-1 ANTIBODY IN COMPLEX WITH A PEPTIDE MIMOTOPE                                                                                                  | IMMUNE SYSTEM                     |
| 1N13 | THE CRYSTAL STRUCTURE OF PYRUVOYL-DEPENDENT ARGININE DECARBOXYLASE FROM METHANOCOCCUS JANNASHII                                                                                                     | LYASE                             |
| 1N1J | CRYSTAL STRUCTURE OF THE NF-YB/NF-YC HISTONE PAIR                                                                                                                                                   | DNA BINDING PROTEIN               |
| 1N1L | CRYSTAL STRUCTURE OF HCV NS3 PROTEASE DOMAIN: NS4A PEPTIDE COMPLEX WITH COVALENTLY BOUND INHIBITOR (GW472467X)                                                                                      | VIRAL PROTEIN                     |
| 1N2C | NITROGENASE COMPLEX FROM AZOTOBACTER VINELANDII STABILIZED BY ADP-TETRAFLUOROALUMINATE                                                                                                              | COMPLEX OF NITROGENASE PROTEINS   |
| 1N2D | TERNARY COMPLEX OF MLC1P BOUND TO IQ2 AND IQ3 OF MYO2P, A CLASS V MYOSIN                                                                                                                            | CELL CYCLE                        |
| 1N2R | A NATURAL SELECTED DIMORPHISM IN HLA B*44 ALTERS SELF, PEPTIDE REPORTOIRE AND T CELL RECOGNITION.                                                                                                   | IMMUNE SYSTEM                     |
| 1N32 | STRUCTURE OF THE THERMUS THERMOPHILUS 30S RIBOSOMAL SUBUNIT BOUND TO CODON AND NEAR-COGNATE TRANSFER RNA ANTICODON STEM-LOOP MISMATCHED AT THE FIRST CODON POSITION AT THE A SITE WITH PAROMOMYCIN  | RIBOSOME                          |
| 1N33 | STRUCTURE OF THE THERMUS THERMOPHILUS 30S RIBOSOMAL SUBUNIT BOUND TO CODON AND NEAR-COGNATE TRANSFER RNA ANTICODON STEM-LOOP MISMATCHED AT THE SECOND CODON POSITION AT THE A SITE WITH PAROMOMYCIN | RIBOSOME                          |

|      |                                                                                                                                                                                                                |                               |
|------|----------------------------------------------------------------------------------------------------------------------------------------------------------------------------------------------------------------|-------------------------------|
| 1N34 | STRUCTURE OF THE THERMUS THERMOPHILUS 30S RIBOSOMAL SUBUNIT IN THE PRESENCE OF CODON AND CRYSTALLOGRAPHICALLY DISORDERED NEAR-COGNATE TRANSFER RNA ANTICODON STEM-LOOP MISMATCHED AT THE FIRST CODON POSITION  | RIBOSOME                      |
| 1N36 | STRUCTURE OF THE THERMUS THERMOPHILUS 30S RIBOSOMAL SUBUNIT IN THE PRESENCE OF CRYSTALLOGRAPHICALLY DISORDERED CODON AND NEAR-COGNATE TRANSFER RNA ANTICODON STEM-LOOP MISMATCHED AT THE SECOND CODON POSITION | RIBOSOME                      |
| 1N3N | CRYSTAL STRUCTURE OF A MYCOBACTERIAL HSP60 EPI TOPE WITH THE MURINE CLASS I MHC MOLECULE H-2DB                                                                                                                 | IMMUNE SYSTEM                 |
| 1N4H | CHARACTERIZATION OF LIGANDS FOR THE ORPHAN NUCLEAR RECEPTOR RORBETA                                                                                                                                            | HORMONE/GROWTH FACTOR         |
| 1N4M | STRUCTURE OF RB TUMOR SUPPRESSOR BOUND TO THE TRANSACTIVATION DOMAIN OF E2F-2                                                                                                                                  | CELL CYCLE                    |
| 1N4P | PROTEIN GERANYLGERANYLTRANSFERASE TYPE-I COMPLEXED WITH GERANYLGERANYL DIPHOSPHATE                                                                                                                             | TRANSFERASE                   |
| 1N4Q | PROTEIN GERANYLGERANYLTRANSFERASE TYPE-I COMPLEXED WITH A GGPP ANALOG AND A KKKSKTKCVIL PEPTIDE                                                                                                                | TRANSFERASE                   |
| 1N4R | PROTEIN GERANYLGERANYLTRANSFERASE TYPE-I COMPLEXED WITH A GERANYLGERANYLATED KKKSKTKCVIL PEPTIDE PRODUCT                                                                                                       | TRANSFERASE                   |
| 1N4S | PROTEIN GERANYLGERANYLTRANSFERASE TYPE-I COMPLEXED WITH GGPP AND A GERANYLGERANYLATED KKKSKTKCVIL PEPTIDE PRODUCT                                                                                              | TRANSFERASE                   |
| 1N52 | CAP BINDING COMPLEX                                                                                                                                                                                            | RNA BINDING PROTEIN           |
| 1N54 | CAP BINDING COMPLEX M7GPPPG FREE                                                                                                                                                                               | RNA BINDING PROTEIN           |
| 1N59 | CRYSTAL STRUCTURE OF THE MURINE CLASS I MAJOR HISTOCOMPATIBILITY COMPLEX OF H-2KB, B2-MICROGLOBULIN, AND A 9-RESIDUE IMMUNODOMINANT PEPTIDE EPI TOPE GP33 DERIVED FROM LCMV                                    | IMMUNE SYSTEM                 |
| 1N5A | CRYSTAL STRUCTURE OF THE MURINE CLASS I MAJOR HISTOCOMPATIBILITY COMPLEX OF H-2DB, B2-MICROGLOBULIN, AND A 9-RESIDUE IMMUNODOMINANT PEPTIDE EPI TOPE GP33 DERIVED FROM LCMV                                    | IMMUNE SYSTEM                 |
| 1N5W | CRYSTAL STRUCTURE OF THE CU <sub>2</sub> MO-CO DEHYDROGENASE (CODH); OXIDIZED FORM                                                                                                                             | OXIDOREDUCTASE                |
| 1N5Y | HIV-1 REVERSE TRANSCRIPTASE CROSSLINKED TO POST-TRANSLOCATION AZTMP-TERMINATED DNA (COMPLEX P)                                                                                                                 | TRANSFERASE/IMMUNE SYSTEM/DNA |
| 1N60 | CRYSTAL STRUCTURE OF THE CU <sub>2</sub> MO-CO DEHYDROGENASE (CODH); CYANIDE-INACTIVATED FORM                                                                                                                  | OXIDOREDUCTASE                |
| 1N61 | CRYSTAL STRUCTURE OF THE CU <sub>2</sub> MO-CO DEHYDROGENASE (CODH); DITHIONITE REDUCED STATE                                                                                                                  | OXIDOREDUCTASE                |
| 1N62 | CRYSTAL STRUCTURE OF THE MO,CU-CO DEHYDROGENASE (CODH), N-BUTYLISOCYANIDE-BOUND STATE                                                                                                                          | OXIDOREDUCTASE                |
| 1N63 | CRYSTAL STRUCTURE OF THE CU <sub>2</sub> MO-CO DEHYDROGENASE (CODH); CARBON MONOXIDE REDUCED STATE                                                                                                             | OXIDOREDUCTASE                |
| 1N64 | CRYSTAL STRUCTURE ANALYSIS OF THE IMMUNODOMINANT ANTIGENIC                                                                                                                                                     | IMMUNE SYSTEM                 |

## SITE ON HEPATITIS C VIRUS PROTEIN BOUND TO MAB 19D9D6

|      |                                                                                                                                                      |                               |
|------|------------------------------------------------------------------------------------------------------------------------------------------------------|-------------------------------|
| 1N6D | TRICORN PROTEASE IN COMPLEX WITH TETRAPEPTIDE CHLOROMETHYL KETONE DERIVATIVE                                                                         | HYDROLASE                     |
| 1N6E | TRICORN PROTEASE IN COMPLEX WITH A TRIDECAPEPTIDE CHLOROMETHYL KETONE DERIVATIVE                                                                     | HYDROLASE                     |
| 1N6Q | HIV-1 REVERSE TRANSCRIPTASE CROSSLINKED TO PRE-TRANSLOCATION AZTMP-TERMINATED DNA (COMPLEX N)                                                        | TRANSFERASE/IMMUNE SYSTEM/DNA |
| 1N73 | FIBRIN D-DIMER, LAMPREY COMPLEXED WITH THE PEPTIDE LIGAND: GLY-HIS-ARG-PRO-AMIDE                                                                     | BLOOD CLOTING                 |
| 1N7F | CRYSTAL STRUCTURE OF THE SIXTH PDZ DOMAIN OF GRIPI IN COMPLEX WITH LIPRIN C-TERMINAL PEPTIDE                                                         | PROTEIN BINDING               |
| 1N7M | GERMLINE 7G12 WITH N-METHYLMESOPORPHYRIN                                                                                                             | IMMUNE SYSTEM                 |
| 1N7S | HIGH RESOLUTION STRUCTURE OF A TRUNCATED NEURONAL SNARE COMPLEX                                                                                      | TRANSPORT PROTEIN             |
| 1N86 | CRYSTAL STRUCTURE OF HUMAN D-DIMER FROM CROSS-LINKED FIBRIN COMPLEXED WITH GPR AND GHRPLDK PEPTIDE LIGANDS.                                          | BLOOD CLOTING                 |
| 1N80 | CRYSTAL STRUCTURE OF A COMPLEX BETWEEN BOVINE CHYMOTRYPSIN AND ECOTIN                                                                                | HYDROLASE                     |
| 1N8R | STRUCTURE OF LARGE RIBOSOMAL SUBUNIT IN COMPLEX WITH VIRGINIAMYCIN M                                                                                 | RIBOSOME                      |
| 1N8Z | CRYSTAL STRUCTURE OF EXTRACELLULAR DOMAIN OF HUMAN HER2 COMPLEXED WITH HERCEPTIN FAB                                                                 | TRANSFERASE                   |
| 1N94 | ARYL TETRAHYDROPYRIDINE INHIBITORS OF FARNESYLTRANSFERASE: GLYCINE, PHENYLALANINE AND HISTIDINE DERIVATES                                            | TRANSFERASE                   |
| 1N95 | ARYL TETRAHYDROPHYRIDINE INHIBITORS OF FARNESYLTRANSFERASE: GLYCINE, PHENYLALANINE AND HISTIDINE DERIVATIVES                                         | TRANSFERASE                   |
| 1N9A | FARNESYLTRANSFERASE COMPLEX WITH TETRAHYDROPYRIDINE INHIBITORS                                                                                       | TRANSFERASE                   |
| 1N9G | MITOCHONDRIAL 2-ENOYL THIOESTER REDUCTASE ETR1P/ETR2P HETERODIMER FROM CANDIDA TROPICALIS                                                            | HYDROLASE                     |
| 1NA1 | THE STRUCTURE OF HRV14 WHEN COMPLEXED WITH PLECONARIL                                                                                                | VIRUS                         |
| 1NAK | IGG1 FAB FRAGMENT (83.1) COMPLEX WITH 16-RESIDUE PEPTIDE (RESIDUES 304-321 OF HIV-1 GP120 (MN ISOLATE))                                              | IMMUNE SYSTEM                 |
| 1NAM | MURINE ALLOREACTIVE SCFV TCR-PEPTIDE-MHC CLASS I MOLECULE COMPLEX                                                                                    | IMMUNE SYSTEM                 |
| 1NAN | MCH CLASS I H-2KB MOLECULE COMPLEXED WITH PBM1 PEPTIDE                                                                                               | IMMUNE SYSTEM                 |
| 1NB3 | CRYSTAL STRUCTURE OF STEFIN A IN COMPLEX WITH CATHEPSIN H: N-TERMINAL RESIDUES OF INHIBITORS CAN ADAPT TO THE ACTIVE SITES OF ENDO-AND EXOPEPTIDASES | HYDROLASE                     |
| 1NB5 | CRYSTAL STRUCTURE OF STEFIN A IN COMPLEX WITH CATHEPSIN H                                                                                            | HYDROLASE                     |
| 1NBE | ASPARTATE TRANSCARBOMYLASE REGULATORY CHAIN MUTANT (T82A)                                                                                            | TRANSFERASE                   |
| 1NBF | CRYSTAL STRUCTURE OF A UBP-FAMILY DEUBIQUITINATING ENZYME                                                                                            | HYDROLASE                     |

## IN ISOLATION AND IN COMPLEX WITH UBIQUITIN ALDEHYDE

|      |                                                                                                                                                                                                                    |                                   |
|------|--------------------------------------------------------------------------------------------------------------------------------------------------------------------------------------------------------------------|-----------------------------------|
| 1NBM | THE STRUCTURE OF BOVINE F1-ATPASE COVALENTLY INHIBITED WITH 4-CHLORO-7-NITROBENZOFURAZAN                                                                                                                           | ATP SYNTHASE                      |
| 1NBU | 7,8-DIHYDRONEOPTERIN ALDOLASE COMPLEXED WITH PRODUCT FROM MYCOBACTERIUM TUBERCULOSIS                                                                                                                               | LYASE                             |
| 1NBV | AN AUTOANTIBODY TO SINGLE-STRANDED DNA: COMPARISON OF THE THREE-DIMENSIONAL STRUCTURES OF THE UNLIGANDED FAB AND A DEOXYNUCLEOTIDE-FAB COMPLEX                                                                     | IMMUNOGLOBULIN                    |
| 1NBW | GLYCEROL DEHYDRATASE REACTIVASE                                                                                                                                                                                    | HYDROLASE                         |
| 1NBY | CRYSTAL STRUCTURE OF HYHEL-63 COMPLEXED WITH HEL MUTANT K96A                                                                                                                                                       | IMMUNE SYSTEM/HYDROLASE           |
| 1NC2 | CRYSTAL STRUCTURE OF MONOCLONAL ANTIBODY 2D12.5 FAB COMPLEXED WITH Y-DOTA                                                                                                                                          | IMMUNE SYSTEM                     |
| 1NC4 | CRYSTAL STRUCTURE OF MONOCLONAL ANTIBODY 2D12.5 FAB COMPLEXED WITH GD-DOTA                                                                                                                                         | IMMUNE SYSTEM                     |
| 1NCA | REFINED CRYSTAL STRUCTURE OF THE INFLUENZA VIRUS N9 NEURAMINIDASE-NC41 FAB COMPLEX                                                                                                                                 | HYDROLASE(O-GLYCOSYL)             |
| 1NCB | CRYSTAL STRUCTURES OF TWO MUTANT NEURAMINIDASE-ANTIBODY COMPLEXES WITH AMINO ACID SUBSTITUTIONS IN THE INTERFACE                                                                                                   | HYDROLASE(O-GLYCOSYL)             |
| 1NCC | CRYSTAL STRUCTURES OF TWO MUTANT NEURAMINIDASE-ANTIBODY COMPLEXES WITH AMINO ACID SUBSTITUTIONS IN THE INTERFACE                                                                                                   | HYDROLASE(O-GLYCOSYL)             |
| 1NCD | REFINED CRYSTAL STRUCTURE OF THE INFLUENZA VIRUS N9 NEURAMINIDASE-NC41 FAB COMPLEX                                                                                                                                 | HYDROLASE(O-GLYCOSYL)             |
| 1NCQ | THE STRUCTURE OF HRV14 WHEN COMPLEXED WITH PLECONARIL, AN ANTIVIRAL COMPOUND                                                                                                                                       | VIRUS                             |
| 1NCR | THE STRUCTURE OF RHINOVIRUS 16 WHEN COMPLEXED WITH PLECONARIL, AN ANTIVIRAL COMPOUND                                                                                                                               | VIRUS                             |
| 1NCW | CATIONIC CYCLIZATION ANTIBODY 4C6 IN COMPLEX WITH BENZOIC ACID                                                                                                                                                     | IMMUNE SYSTEM                     |
| 1ND0 | CATIONIC CYCLIZATION ANTIBODY 4C6 COMPLEX WITH TRANSITION STATE ANALOG                                                                                                                                             | IMMUNE SYSTEM                     |
| 1ND2 | THE STRUCTURE OF RHINOVIRUS 16                                                                                                                                                                                     | VIRUS                             |
| 1ND3 | THE STRUCTURE OF HRV16, WHEN COMPLEXED WITH PLECONARIL, AN ANTIVIRAL COMPOUND                                                                                                                                      | VIRUS                             |
| 1NDM | CRYSTAL STRUCTURE OF FAB FRAGMENT OF ANTIBODY HYHEL-26 COMPLEXED WITH LYSOZYME                                                                                                                                     | IMMUNE SYSTEM/HYDROLASE           |
| 1NDO | NAPHTHALENE 1,2-DIOXYGENASE                                                                                                                                                                                        | NON-HEME IRON DIOXYGENASE         |
| 1NEJ | CRYSTALLINE HUMAN CARBONMONOXY HEMOGLOBIN S (LIGANDED SICKLE CELL HEMOGLOBIN) EXHIBITS THE R2 QUATERNARY STATE AT NEUTRAL PH IN THE PRESENCE OF POLYETHYLENE GLYCOL: THE 2.1 ANGSTROM RESOLUTION CRYSTAL STRUCTURE | OXYGEN STORAGE/TRANSPORT          |
| 1NEK | COMPLEX II (SUCCINATE DEHYDROGENASE) FROM E. COLI WITH UBIQUINONE BOUND                                                                                                                                            | OXIDOREDUCTASE/ELECTRON TRANSPORT |
| 1NEN | COMPLEX II (SUCCINATE DEHYDROGENASE) FROM E. COLI WITH                                                                                                                                                             | OXIDOREDUCTASE/ELECTRON TRANSPORT |

DINITROPHENOL-17 INHIBITOR CO-CRYSTALLIZED AT THE  
UBIQUINONE BINDING SITE

|      |                                                                                                                            |                                         |
|------|----------------------------------------------------------------------------------------------------------------------------|-----------------------------------------|
| INEX | CRYSTAL STRUCTURE OF SCSKP1-SCCDC4-CPD PEPTIDE COMPLEX                                                                     | LIGASE, CELL CYCLE                      |
| INF3 | STRUCTURE OF CDC42 IN A COMPLEX WITH THE GTPASE-BINDING DOMAIN OF THE CELL POLARITY PROTEIN, PAR6                          | SIGNALING PROTEIN                       |
| INF5 | CRYSTAL STRUCTURE OF LACTOSE SYNTHASE, COMPLEX WITH GLUCOSE                                                                | TRANSFERASE/TRANSFERASE                 |
| INFD | AN ALPHA-BETA T CELL RECEPTOR (TCR) HETERODIMER IN COMPLEX WITH AN ANTI-TCR FAB FRAGMENT DERIVED FROM A MITOGENIC ANTIBODY | COMPLEX (IMMUNORECEPTOR/IMMUNOGLOBULIN) |
| INFU | CRYSTAL STRUCTURE OF HUMAN COAGULATION FACTOR XA COMPLEXED WITH RPR132747                                                  | HYDROLASE                               |
| INFW | CRYSTAL STRUCTURE OF HUMAN COAGULATION FACTOR XA COMPLEXED WITH RPR209685                                                  | HYDROLASE                               |
| INFX | CRYSTAL STRUCTURE OF HUMAN COAGULATION FACTOR XA COMPLEXED WITH RPR208944                                                  | HYDROLASE                               |
| INFY | CRYSTAL STRUCTURE OF HUMAN COAGULATION FACTOR XA COMPLEXED WITH RPR200095                                                  | HYDROLASE                               |
| INGM | CRYSTAL STRUCTURE OF A YEAST BRF1-TBP-DNA TERNARY COMPLEX                                                                  | TRANSCRIPTION/DNA                       |
| INGW | CHIMERIC AFFINITY MATURED FAB 7G12 COMPLEXED WITH MESOPORPHYRIN                                                            | IMMUNE SYSTEM                           |
| INGX | CHIMERIC GERMLINE FAB 7G12 WITH JEFFAMINE FRAGMENT BOUND                                                                   | IMMUNE SYSTEM                           |
| INGY | CHIMERIC MATURE FAB 7G12-APO                                                                                               | IMMUNE SYSTEM                           |
| INGZ | CHIMERIC GERMLINE FAB 7G12-APO                                                                                             | IMMUNE SYSTEM                           |
| INH0 | 1.03 A STRUCTURE OF HIV-1 PROTEASE: INHIBITOR BINDING INSIDE AND OUTSIDE THE ACTIVE SITE                                   | HYDROLASE/HYDROLASE INHIBITOR           |
| INH2 | CRYSTAL STRUCTURE OF A YEAST TFIIA/TBP/DNA COMPLEX                                                                         | TRANSCRIPTION/DNA                       |
| INHE | CRYSTAL STRUCTURE OF LACTOSE SYNTHASE COMPLEX WITH UDP                                                                     | TRANSFERASE ACTIVATOR/TRANSFERASE       |
| INHG | CRYSTAL STRUCTURE ANALYSIS OF PLASMODIUM FALCIPARUM ENOYL-ACYL-CARRIER-PROTEIN REDUCTASE WITH TRICLOSAN                    | OXIDOREDUCTASE                          |
| INHW | CRYSTAL STRUCTURE ANALYSIS OF PLASMODIUM FALCIPARUM ENOYL-ACYL-CARRIER-PROTEIN REDUCTASE                                   | OXIDOREDUCTASE                          |
| INI1 | IMIDAZOLE AND CYANOPHENYL FARNESYL TRANSFERASE INHIBITORS                                                                  | TRANSFERASE                             |
| INI4 | HUMAN PYRUVATE DEHYDROGENASE                                                                                               | OXIDOREDUCTASE                          |
| INIH | STRUCTURE OF DEOXY-QUATERNARY HAEMOGLOBIN WITH LIGANDED BETA SUBUNITS                                                      | OXYGEN TRANSPORT                        |
| INIK | WILD TYPE RNA POLYMERASE II                                                                                                | TRANSCRIPTION                           |
| INIW | CRYSTAL STRUCTURE OF ENDOTHELIAL NITRIC OXIDE SYNTHASE PEPTIDE BOUND TO CALMODULIN                                         | SIGNALING PROTEIN/OXIDOREDUCTASE        |
| INJ9 | COCAINE HYDROLYTIC ANTIBODY 15A10                                                                                          | IMMUNE SYSTEM                           |
| INJI | STRUCTURE OF CHLORAMPHENICOL BOUND TO THE 50S RIBOSOMAL                                                                    | RIBOSOME                                |

| SUBUNIT |                                                                                                                                                    |                                      |
|---------|----------------------------------------------------------------------------------------------------------------------------------------------------|--------------------------------------|
| 1NJT    | COMPLEX STRUCTURE OF HCMV PROTEASE AND A PEPTIDOMIMETIC INHIBITOR                                                                                  | HYDROLASE                            |
| 1NJU    | COMPLEX STRUCTURE OF HCMV PROTEASE AND A PEPTIDOMIMETIC INHIBITOR                                                                                  | HYDROLASE                            |
| 1NKK    | COMPLEX STRUCTURE OF HCMV PROTEASE AND A PEPTIDOMIMETIC INHIBITOR                                                                                  | HYDROLASE                            |
| 1NKM    | COMPLEX STRUCTURE OF HCMV PROTEASE AND A PEPTIDOMIMETIC INHIBITOR                                                                                  | HYDROLASE                            |
| 1NKP    | CRYSTAL STRUCTURE OF MYC-MAX RECOGNIZING DNA                                                                                                       | TRANSCRIPTION/DNA                    |
| 1NKZ    | CRYSTAL STRUCTURE OF LH2 B800-850 FROM RPS. ACIDOPHILA AT 2.0 ANGSTROM RESOLUTION                                                                  | MEMBRANE PROTEIN                     |
| 1NL0    | CRYSTAL STRUCTURE OF HUMAN FACTOR IX GLA DOMAIN IN COMPLEX OF AN INHIBITORY ANTIBODY, 10C12                                                        | IMMUNE SYSTEM                        |
| 1NL4    | CRYSTAL STRUCTURE OF RAT FARNESYL TRANSFERASE IN COMPLEX WITH A POTENT BIPHENYL INHIBITOR                                                          | TRANSFERASE                          |
| 1NLB    | CRYSTAL STRUCTURE OF ANTI-HCV MONOCLONAL ANTIBODY 19D9D6                                                                                           | IMMUNE SYSTEM                        |
| 1NLD    | FAB FRAGMENT OF A NEUTRALIZING ANTIBODY DIRECTED AGAINST AN EPITOPE OF GP41 FROM HIV-1                                                             | IMMUNOGLOBULIN                       |
| 1NLN    | CRYSTAL STRUCTURE OF HUMAN ADENOVIRUS 2 PROTEINASE WITH ITS 11 AMINO ACID COFACTOR AT 1.6 ANGSTROM RESOLUTION                                      | HYDROLASE                            |
| 1NLV    | CRYSTAL STRUCTURE OF DICTYOSTELIUM DISCOIDEUM ACTIN COMPLEXED WITH CA ATP AND HUMAN GELSOLIN SEGMENT 1                                             | STRUCTURAL PROTEIN                   |
| 1NLW    | CRYSTAL STRUCTURE OF MAD-MAX RECOGNIZING DNA                                                                                                       | TRANSCRIPTION/DNA                    |
| 1NMI    | CRYSTAL STRUCTURE OF D. DISCOIDEUM ACTIN COMPLEXED WITH GELSOLIN SEGMENT 1 AND MG ATP AT 1.8 A RESOLUTION                                          | STRUCTURAL PROTEIN                   |
| 1NMD    | CRYSTAL STRUCTURE OF D. DISCOIDEUM ACTIN-GELSOLIN SEGMENT 1 COMPLEX CRYSTALLIZED IN PRESENCE OF LITHIUM ATP                                        | STRUCTURAL PROTEIN                   |
| 1NME    | STRUCTURE OF CASP-3 WITH TETHERED SALICYLATE                                                                                                       | APOPTOSIS, HYDROLASE                 |
| 1NMM    | BETA-1,4-GALACTOSYLTRANSFERASE MUTANT CYS342THR COMPLEX WITH ALPHA-LACTALBUMIN AND GLCNAC                                                          | TRANSFERASE ACTIVATOR/TRANSFERASE    |
| 1NMU    | MBP-L30                                                                                                                                            | SUGAR BINDING PROTEIN/RIBOSOME       |
| 1NNU    | CRYSTAL STRUCTURE ANALYSIS OF PLASMODIUM FALCIPARUM ENOYL-ACYL-CARRIER-PROTEIN REDUCTASE WITH TRICLOSAN ANALOG                                     | OXIDOREDUCTASE                       |
| 1NOC    | MURINE INDUCIBLE NITRIC OXIDE SYNTHASE OXYGENASE DOMAIN (DELTA 114) COMPLEXED WITH TYPE I E. COLI CHLORAMPHENICOL ACETYL TRANSFERASE AND IMIDAZOLE | COMPLEX (OXIDOREDUCTASE/TRANSFERASE) |
| 1NOP    | CRYSTAL STRUCTURE OF HUMAN TYROSYL-DNA PHOSPHODIESTERASE (TDP1) IN COMPLEX WITH VANADATE, DNA AND A HUMAN TOPOISOMERASE I-DERIVED PEPTIDE          | HYDROLASE/DNA                        |
| 1-Nov   | NODAMURA VIRUS                                                                                                                                     | VIRUS                                |
| 1NPO    | BOVINE NEUROPHYSIN II COMPLEX WITH OXYTOCIN                                                                                                        | COMPLEX (HORMONE TRANSPORT/HORMONE)  |

|      |                                                                                                                                            |                                    |
|------|--------------------------------------------------------------------------------------------------------------------------------------------|------------------------------------|
| 1NQ7 | CHARACTERIZATION OF LIGANDS FOR THE ORPHAN NUCLEAR RECEPTOR RORBETA                                                                        | TRANSCRIPTION                      |
| 1NQI | CRYSTAL STRUCTURE OF LACTOSE SYNTHASE, A 1:1 COMPLEX BETWEEN BETA1,4-GALACTOSYLTRANSFERASE AND ALPHA-LACTALBUMIN IN THE PRESENCE OF GLCNAC | TRANSFERASE ACTIVATOR/TRANSFERASE  |
| 1NQL | STRUCTURE OF THE EXTRACELLULAR DOMAIN OF HUMAN EPIDERMAL GROWTH FACTOR (EGF) RECEPTOR IN AN INACTIVE (LOW PH) COMPLEX WITH EGF.            | HORMONE/GROWTH FACTOR RECEPTOR     |
| 1NRJ | SIGNAL RECOGNITION PARTICLE RECEPTOR BETA-SUBUNIT IN COMPLEX WITH THE SRX DOMAIN FROM THE ALPHA-SUBUNIT                                    | PROTEIN TRANSPORT                  |
| 1NRL | CRYSTAL STRUCTURE OF THE HUMAN PXR-LBD IN COMPLEX WITH AN SRC-1 COACTIVATOR PEPTIDE AND SR12813                                            | TRANSCRIPTION                      |
| 1NRN | CRYSTALLOGRAPHIC STRUCTURES OF THROMBIN COMPLEXED WITH THROMBIN RECEPTOR PEPTIDES: EXISTENCE OF EXPECTED AND NOVEL BINDING MODES           | SERINE PROTEINASE/RECEPTOR         |
| 1NRO | CRYSTALLOGRAPHIC STRUCTURES OF THROMBIN COMPLEXED WITH THROMBIN RECEPTOR PEPTIDES: EXISTENCE OF EXPECTED AND NOVEL BINDING MODES           | SERINE PROTEINASE/RECEPTOR         |
| 1NRP | CRYSTALLOGRAPHIC STRUCTURES OF THROMBIN COMPLEXED WITH THROMBIN RECEPTOR PEPTIDES: EXISTENCE OF EXPECTED AND NOVEL BINDING MODES           | SERINE PROTEINASE/RECEPTOR         |
| 1NRQ | CRYSTALLOGRAPHIC STRUCTURES OF THROMBIN COMPLEXED WITH THROMBIN RECEPTOR PEPTIDES: EXISTENCE OF EXPECTED AND NOVEL BINDING MODES           | SERINE PROTEINASE/RECEPTOR         |
| 1NRR | CRYSTALLOGRAPHIC STRUCTURES OF THROMBIN COMPLEXED WITH THROMBIN RECEPTOR PEPTIDES: EXISTENCE OF EXPECTED AND NOVEL BINDING MODES           | SERINE PROTEINASE/RECEPTOR         |
| 1NRS | CRYSTALLOGRAPHIC STRUCTURES OF THROMBIN COMPLEXED WITH THROMBIN RECEPTOR PEPTIDES: EXISTENCE OF EXPECTED AND NOVEL BINDING MODES           | SERINE PROTEINASE/RECEPTOR         |
| 1NS3 | STRUCTURE OF HCV PROTEASE (BK STRAIN)                                                                                                      | COMPLEX (HYDROLASE/PEPTIDE)        |
| 1NS6 | THE 2.1A STRUCTURE OF HORSE (ALPHA HEMICHROME/BETA MET) HEMOGLOBIN AT PH 5.4                                                               | OXYGEN STORAGE/TRANSPORT           |
| 1NSG | THE STRUCTURE OF THE IMMUNOPHILIN-IMMUNOSUPPRESSANT FKBP12-RAPAMYCIN COMPLEX INTERACTING WITH HUMAN FRAP                                   | COMPLEX (ISOMERASE/KINASE)         |
| 1NSN | THE CRYSTAL STRUCTURE OF ANTIBODY N10-STAPHYLOCOCCAL NUCLEASE COMPLEX AT 2.9 ANGSTROMS RESOLUTION                                          | COMPLEX (IMMUNOGLOBULIN/HYDROLASE) |
| 1NT2 | CRYSTAL STRUCTURE OF FIBRILLARIN/NOP5P COMPLEX                                                                                             | RNA BINDING PROTEIN                |
| 1NTK | CRYSTAL STRUCTURE OF MITOCHONDRIAL CYTOCHROME BC1 IN COMPLEX WITH ANTIMYCIN A1                                                             | OXIDOREDUCTASE                     |
| 1NTM | CRYSTAL STRUCTURE OF MITOCHONDRIAL CYTOCHROME BC1 COMPLEX AT 2.4 ANGSTROM                                                                  | OXIDOREDUCTASE                     |
| 1NTV | CRYSTAL STRUCTURE OF THE DISABLED-1 (DAB1) PTB DOMAIN-APOER2 PEPTIDE COMPLEX                                                               | SIGNALING PROTEIN                  |
| 1NTZ | CRYSTAL STRUCTURE OF MITOCHONDRIAL CYTOCHROME BC1 COMPLEX                                                                                  | OXIDOREDUCTASE                     |



## BOUND WITH UBIQUINONE

|      |                                                                                                                  |                                        |
|------|------------------------------------------------------------------------------------------------------------------|----------------------------------------|
| 1NU1 | CRYSTAL STRUCTURE OF MITOCHONDRIAL CYTOCHROME BC1 COMPLEXED WITH 2-NONYL-4-HYDROXYQUINOLINE N-OXIDE (NQNO)       | OXIDOREDUCTASE                         |
| 1NU2 | CRYSTAL STRUCTURE OF THE MURINE DISABLED-1 (DAB1) PTB DOMAIN-APOER2 PEPTIDE-PI-4,5P2 TERNARY COMPLEX             | SIGNALING PROTEIN                      |
| 1NU7 | STAPHYLOCOAGULASE-THROMBIN COMPLEX                                                                               | HYDROLASE/PROTEIN BINDING              |
| 1NU8 | CRYSTAL STRUCTURE OF HUMAN DIPEPTIDYL PEPTIDASE IV (DPP-IV) IN COMPLEX WITH DIPROTIN A (IL1)                     | HYDROLASE                              |
| 1NU9 | STAPHYLOCOAGULASE-PRETHROMBIN-2 COMPLEX                                                                          | HYDROLASE/PROTEIN BINDING              |
| 1NVI | ORTHORHOMBIC CRYSTAL FORM OF MOLYBDOPTERIN SYNTHASE                                                              | TRANSFERASE                            |
| 1NVM | CRYSTAL STRUCTURE OF A BIFUNCTIONAL ALDOLASE-DEHYDROGENASE : SEQUESTERING A REACTIVE AND VOLATILE INTERMEDIATE   | LYASE/OXIDOREDUCTASE                   |
| 1NVP | HUMAN TFIIA/TBP/DNA COMPLEX                                                                                      | TRANSCRIPTION/DNA                      |
| 1NVU | STRUCTURAL EVIDENCE FOR FEEDBACK ACTIVATION BY RASGTP OF THE RAS-SPECIFIC NUCLEOTIDE EXCHANGE FACTOR SOS         | SIGNALING PROTEIN                      |
| 1NVV | STRUCTURAL EVIDENCE FOR FEEDBACK ACTIVATION BY RASGTP OF THE RAS-SPECIFIC NUCLEOTIDE EXCHANGE FACTOR SOS         | SIGNALING PROTEIN                      |
| 1NVW | STRUCTURAL EVIDENCE FOR FEEDBACK ACTIVATION BY RASGTP OF THE RAS-SPECIFIC NUCLEOTIDE EXCHANGE FACTOR SOS         | SIGNALING PROTEIN                      |
| 1NW9 | STRUCTURE OF CASPASE-9 IN AN INHIBITORY COMPLEX WITH XIAP-BIR3                                                   | APOPTOSIS                              |
| 1NWG | BETA-1,4-GALACTOSYLTRANSFERASE COMPLEX WITH ALPHA-LACTALBUMIN AND N-BUTANOYL-GLUCOAMINE                          | TRANSFERASE ACTIVATOR/TRANSFERASE      |
| 1NX0 | STRUCTURE OF CALPAIN DOMAIN 6 IN COMPLEX WITH CALPASTATIN DIC                                                    | HYDROLASE                              |
| 1NX1 | CALPAIN DOMAIN VI COMPLEXED WITH CALPASTATIN INHIBITORY DOMAIN C (DIC)                                           | HYDROLASE                              |
| 1NYS | CRYSTAL STRUCTURE OF ACTIVIN A BOUND TO THE ECD OF ACTRIIB P41                                                   | MEMBRANE PROTEIN/HORMONE/GROWTH FACTOR |
| 1NZL | CRYSTAL STRUCTURE OF SRC SH2 DOMAIN BOUND TO DOUBLY PHOSPHORYLATED PEPTIDE PQPYEPIPI                             | TRANSFERASE                            |
| 1NZQ | D-PHE-PRO-ARG-TYPE THROMBIN INHIBITOR                                                                            | BLOOD CLOTTING/HYDROLASE INHIBITOR     |
| 1NZV | CRYSTAL STRUCTURE OF SRC SH2 DOMAIN BOUND TO DOUBLY PHOSPHORYLATED PEPTIDE PQPIPYVPA                             | TRANSFERASE                            |
| 1NZY | -CHLOROBENZOYL COENZYME A DEHALOGENASE FROM PSEUDOMONAS SP. STRAIN CBS-3                                         | LYASE                                  |
| 1O0D | HUMAN THROMBIN COMPLEXED WITH A D-PHE-PRO-ARG-TYPE INHIBITOR AND A C-TERMINAL HIRUDIN DERIVED EXO-SITE INHIBITOR | BLOOD CLOTTING/HYDROLASE INHIBITOR     |
| 1O1B | MOLECULAR MODELS OF AVERAGED RIGOR CROSSBRIDGES FROM TOMOGRAMS OF INSECT FLIGHT MUSCLE                           | CONTRACTILE PROTEIN                    |
| 1O1C | MOLECULAR MODELS OF AVERAGED RIGOR CROSSBRIDGES FROM                                                             | CONTRACTILE PROTEIN                    |

| TOMOGRAMS OF INSECT FLIGHT MUSCLE |                                                                                                                                                      |                                   |
|-----------------------------------|------------------------------------------------------------------------------------------------------------------------------------------------------|-----------------------------------|
| 1O1D                              | MOLECULAR MODELS OF AVERAGED RIGOR CROSSBRIDGES FROM TOMOGRAMS OF INSECT FLIGHT MUSCLE                                                               | CONTRACTILE PROTEIN               |
| 1O1E                              | MOLECULAR MODELS OF AVERAGED RIGOR CROSSBRIDGES FROM TOMOGRAMS OF INSECT FLIGHT MUSCLE                                                               | CONTRACTILE PROTEIN               |
| 1O1F                              | MOLECULAR MODELS OF AVERAGED RIGOR CROSSBRIDGES FROM TOMOGRAMS OF INSECT FLIGHT MUSCLE                                                               | CONTRACTILE PROTEIN               |
| 1O1G                              | MOLECULAR MODELS OF AVERAGED RIGOR CROSSBRIDGES FROM TOMOGRAMS OF INSECT FLIGHT MUSCLE                                                               | CONTRACTILE PROTEIN               |
| 1O1K                              | DEOXY HEMOGLOBIN (A,C:V1M; B,D:V1M,V67W)                                                                                                             | OXYGEN STORAGE/TRANSPORT          |
| 1O1L                              | DEOXY HEMOGLOBIN (A-GLY-C:V1M,L29W,H58Q; B,D:V1M)                                                                                                    | OXYGEN STORAGE/TRANSPORT          |
| 1O1M                              | DEOXY HEMOGLOBIN (A-GLYGLYGLY-C:V1M,L29F,H58Q B,D:V1M,V67W)                                                                                          | OXYGEN STORAGE/TRANSPORT          |
| 1O1N                              | DEOXY HEMOGLOBIN (A-GLYGLYGLY-C:V1M,L29W; B,D:V1M)                                                                                                   | OXYGEN STORAGE/TRANSPORT          |
| 1O1O                              | DEOXY HEMOGLOBIN (A,C:V1M,V62L; B,D:V1M,V67L)                                                                                                        | OXYGEN STORAGE/TRANSPORT          |
| 1O1P                              | DEOXY HEMOGLOBIN (A-GLY-C:V1M; B,D:V1M,C93A,N108K)                                                                                                   | OXYGEN STORAGE/TRANSPORT          |
| 1O1R                              | STRUCTURE OF FPT BOUND TO GGPP                                                                                                                       | TRANSFERASE                       |
| 1O1S                              | STRUCTURE OF FPT BOUND TO ISOPRENOID ANALOG 3B                                                                                                       | TRANSFERASE                       |
| 1O1T                              | STRUCTURE OF FPT BOUND TO THE CVIM-FPP PRODUCT                                                                                                       | TRANSFERASE                       |
| 1O23                              | CRYSTAL STRUCTURE OF LACTOSE SYNTHASE IN THE PRESENCE OF UDP-GLUCOSE                                                                                 | TRANSFERASE ACTIVATOR/TRANSFERASE |
| 1O2G                              | ELABORATE MANIFOLD OF SHORT HYDROGEN BOND ARRAYS MEDIATING BINDING OF ACTIVE SITE-DIRECTED SERINE PROTEASE INHIBITORS                                | BLOOD CLOTting, HYDROLASE         |
| 1O4X                              | TERNARY COMPLEX OF THE DNA BINDING DOMAINS OF THE OCT1 AND SOX2 TRANSCRIPTION FACTORS WITH A 19MER OLIGONUCLEOTIDE FROM THE HOXB1 REGULATORY ELEMENT | TRANSCRIPTION/DNA                 |
| 1O5D                              | DISSECTING AND DESIGNING INHIBITOR SELECTIVITY DETERMINANTS AT THE S1 SITE USING AN ARTIFICIAL ALA190 PROTEASE (ALA190 UPA)                          | BLOOD CLOTting, HYDROLASE         |
| 1O5E                              | DISSECTING AND DESIGNING INHIBITOR SELECTIVITY DETERMINANTS AT THE S1 SITE USING AN ARTIFICIAL ALA190 PROTEASE (ALA190 UPA)                          | SERINE PROTEASE, HYDROLASE        |
| 1O5F                              | DISSECTING AND DESIGNING INHIBITOR SELECTIVITY DETERMINANTS AT THE S1 SITE USING AN ARTIFICIAL ALA190 PROTEASE (ALA190 UPA)                          | SERINE PROTEASE, HYDROLASE        |
| 1O5G                              | DISSECTING AND DESIGNING INHIBITOR SELECTIVITY DETERMINANTS AT THE S1 SITE USING AN ARTIFICIAL ALA190 PROTEASE (ALA190 UPA)                          | BLOOD CLOTting, HYDROLASE         |
| 1O5M                              | STRUCTURE OF FPT BOUND TO THE INHIBITOR SCH66336                                                                                                     | TRANSFERASE/TRANSFERASE INHIBITOR |
| 1O6K                              | STRUCTURE OF ACTIVATED FORM OF PKB KINASE DOMAIN S474D WITH GSK3 PEPTIDE AND AMP-PNP                                                                 | TRANSFERASE                       |
| 1O6L                              | CRYSTAL STRUCTURE OF AN ACTIVATED AKT/PROTEIN KINASE B (PKB-PIF CHIMERA) TERNARY COMPLEX WITH AMP-PNP AND GSK3 PEPTIDE                               | TRANSFERASE                       |

|      |                                                                                                                                    |                                     |
|------|------------------------------------------------------------------------------------------------------------------------------------|-------------------------------------|
| 1O7D | THE STRUCTURE OF THE BOVINE LYSOSOMAL A-MANNOSIDASE SUGGESTS A NOVEL MECHANISM FOR LOW PH ACTIVATION                               | HYDROLASE                           |
| 1O7G | NAPHTHALENE 1,2-DIOXYGENASE WITH NAPHTHALENE BOUND IN THE ACTIVE SITE.                                                             | OXIDOREDUCTASE                      |
| 1O7H | NAPHTHALENE 1,2-DIOXYGENASE WITH OXIDIZED RIESKE IRON SULPHUR CENTER SITE.                                                         | OXIDOREDUCTASE                      |
| 1O7M | NAPHTHALENE 1,2-DIOXYGENASE, BINARY COMPLEX WITH DIOXYGEN                                                                          | OXIDOREDUCTASE                      |
| 1O7N | NAPHTHALENE 1,2-DIOXYGENASE, TERNARY COMPLEX WITH DIOXYGEN AND INDOLE                                                              | OXIDOREDUCTASE                      |
| 1O7P | NAPHTHALENE 1,2-DIOXYGENASE, PRODUCT COMPLEX                                                                                       | OXIDOREDUCTASE                      |
| 1O7W | NAPHTHALENE 1,2-DIOXYGENASE, FULLY REDUCED FORM                                                                                    | OXIDOREDUCTASE                      |
| 1O94 | TERNARY COMPLEX BETWEEN TRIMETHYLAMINE DEHYDROGENASE AND ELECTRON TRANSFERRING FLAVOPROTEIN                                        | ELECTRON TRANSPORT                  |
| 1O95 | TERNARY COMPLEX BETWEEN TRIMETHYLAMINE DEHYDROGENASE AND ELECTRON TRANSFERRING FLAVOPROTEIN                                        | ELECTRON TRANSPORT/COMPLEX          |
| 1O96 | STRUCTURE OF ELECTRON TRANSFERRING FLAVOPROTEIN FOR METHYLOPHILUS METHYLOTROPHUS.                                                  | ELECTRON TRANSFER                   |
| 1O97 | STRUCTURE OF ELECTRON TRANSFERRING FLAVOPROTEIN FROM METHYLOPHILUS METHYLOTROPHUS, RECOGNITION LOOP REMOVED BY LIMITED PROTEOLYSIS | ELECTRON TRANSFER                   |
| 1O9D | STRUCTURAL VIEW OF A FUNGAL TOXIN ACTING ON A 14-3-3 REGULATORY COMPLEX                                                            | PROTEIN BINDING                     |
| 1O9F | STRUCTURAL VIEW OF A FUNGAL TOXIN ACTING ON A 14-3-3 REGULATORY COMPLEX                                                            | PROTEIN BINDING                     |
| 1O9S | CRYSTAL STRUCTURE OF A TERNARY COMPLEX OF THE HUMAN HISTONE METHYLTRANSFERASE SET7/9                                               | TRANSFERASE                         |
| 1O9U | GLYCOGEN SYNTHASE KINASE 3 BETA COMPLEXED WITH AXIN PEPTIDE                                                                        | KINASE                              |
| 1OAI | COMPLEX BETWEEN TAP UBA DOMAIN AND FXFG NUCLEOPORIN PEPTIDE                                                                        | NUCLEAR TRANSPORT                   |
| 1OAK | CRYSTAL STRUCTURE OF THE VON WILLEBRAND FACTOR (VWF) A1 DOMAIN IN COMPLEX WITH THE FUNCTION BLOCKING NMC-4 FAB                     | COMPLEX (WILLEBRAND/IMMUNOGLOBULIN) |
| 1OAO | NIZN[FE4S4] AND NINI[FE4S4] CLUSTERS IN CLOSED AND OPEN ALPHA SUBUNITS OF ACETYL-COA SYNTHASE/CARBON MONOXIDE DEHYDROGENASE        | OXIDOREDUCTASE                      |
| 1OAZ | IGE FV SPE7 COMPLEXED WITH A RECOMBINANT THIOREDOXIN                                                                               | ANTIBODY/COMPLEX                    |
| 1OBX | CRYSTAL STRUCTURE OF THE COMPLEX OF PDZ2 OF SYNTENIN WITH AN INTERLEUKIN 5 RECEPTOR ALPHA PEPTIDE.                                 | ADHESION/COMPLEX                    |
| 1OBY | CRYSTAL STRUCTURE OF THE COMPLEX OF PDZ2 OF SYNTENIN WITH A SYNDECAN-4 PEPTIDE.                                                    | ADHESION/COMPLEX                    |
| 1OBZ | CRYSTAL STRUCTURE OF THE COMPLEX OF THE PDZ TANDEM OF SYNTENIN WITH AN INTERLEUKIN 5 RECEPTOR ALPHA PEPTIDE.                       | ADHESION/COMPLEX                    |
| 1OC0 | PLASMINOGEN ACTIVATOR INHIBITOR-1 COMPLEX WITH SOMATOMEDIN B DOMAIN OF VITRONECTIN                                                 | SERINE PROTEASE INHIBITOR/COMPLEX   |

|      |                                                                                                                                       |                                       |
|------|---------------------------------------------------------------------------------------------------------------------------------------|---------------------------------------|
| 1OCC | STRUCTURE OF BOVINE HEART CYTOCHROME C OXIDASE AT THE FULLY OXIDIZED STATE                                                            | OXIDOREDUCTASE (CYTOCHROME(C)-OXYGEN) |
| 1OCO | BOVINE HEART CYTOCHROME C OXIDASE IN CARBON MONOXIDE-BOUND STATE                                                                      | OXIDOREDUCTASE                        |
| 1OCR | BOVINE HEART CYTOCHROME C OXIDASE IN THE FULLY REDUCED STATE                                                                          | OXIDOREDUCTASE                        |
| 1OCW | FREE CONFORMATION AB2 OF THE IGE SPE-7                                                                                                | ANTIBODY                              |
| 1OCZ | BOVINE HEART CYTOCHROME C OXIDASE IN AZIDE-BOUND STATE                                                                                | OXIDOREDUCTASE                        |
| 1OE9 | CRYSTAL STRUCTURE OF MYOSIN V MOTOR WITH ESSENTIAL LIGHT CHAIN- NUCLEOTIDE-FREE                                                       | ATPASE/MYOSIN                         |
| 1OED | STRUCTURE OF ACETYLCHOLINE RECEPTOR PORE FROM ELECTRON IMAGES                                                                         | ION CHANNEL/RECEPTOR                  |
| 1OEX | ATOMIC RESOLUTION STRUCTURE OF ENDOTHAPEPSIN IN COMPLEX WITH A HYDROXYETHYLENE TRANSITION STATE ANALOGUE INHIBITOR H261               | HYDROLASE                             |
| 1OEY | HETERODIMER OF P40PHOX AND P67PHOX PB1 DOMAINS FROM HUMAN NADPH OXIDASE                                                               | PB1 HETERODIMER/COMPLEX               |
| 1OF2 | CRYSTAL STRUCTURE OF HLA-B*2709 COMPLEXED WITH THE VASOACTIVE INTESTINAL PEPTIDE TYPE 1 RECEPTOR (VIPR) PEPTIDE (RESIDUES 400-408)    | IMMUNE SYSTEM                         |
| 1OFH | ASYMMETRIC COMPLEX BETWEEN HSLV AND I-DOMAIN DELETED HSLU (H. INFLUENZAE)                                                             | HYDROLASE                             |
| 1OFI | ASYMMETRIC COMPLEX BETWEEN HSLV AND I-DOMAIN DELETED HSLU (H. INFLUENZAE)                                                             | HYDROLASE                             |
| 1OFU | CRYSTAL STRUCTURE OF SULA:FTSZ FROM PSEUDOMONAS AERUGINOSA                                                                            | BACTERIAL CELL DIVISION INHIBITOR     |
| 1OGA | A STRUCTURAL BASIS FOR IMMUNODOMINANT HUMAN T-CELL RECEPTOR RECOGNITION.                                                              | IMMUNE SYSTEM/RECEPTOR/COMPLEX        |
| 1OGT | CRYSTAL STRUCTURE OF HLA-B*2705 COMPLEXED WITH THE VASOACTIVE INTESTINAL PEPTIDE TYPE 1 RECEPTOR (VIPR) PEPTIDE (RESIDUES 400-408)    | IMMUNE SYSTEM/COMPLEX                 |
| 1OGU | STRUCTURE OF HUMAN THR160-PHOSPHO CDK2/CYCLIN A COMPLEXED WITH A 2-ARYLAMINO-4-CYCLOHEXYLMETHYL-5-NITROSO-6-AMINOPYRIMIDINE INHIBITOR | TRANSFERASE                           |
| 1OGV | LIPIDIC CUBIC PHASE CRYSTAL STRUCTURE OF THE PHOTOSYNTHETIC REACTION CENTRE FROM RHODOBACTER SPHAEROIDES                              | REACTION CENTRE                       |
| 1OHE | STRUCTURE OF CDC14B PHOSPHATASE WITH A PEPTIDE LIGAND                                                                                 | HYDROLASE                             |
| 1OHH | BOVINE MITOCHONDRIAL F1-ATPASE COMPLEXED WITH THE INHIBITOR PROTEIN IF1                                                               | SYNTHASE                              |
| 1OHZ | COHESIN-DOCKERIN COMPLEX FROM THE CELLULOSOME OF CLOSTRIDIUM THERMOCELLUM                                                             | COHESIN/DOCKERIN COMPLEX              |
| 1OI9 | STRUCTURE OF HUMAN THR160-PHOSPHO CDK2/CYCLIN A COMPLEXED WITH A 6-CYCLOHEXYLMETHYLOXY-2-ANILINO-PURINE INHIBITOR                     | KINASE                                |
| 1OIJ | CRYSTAL STRUCTURE OF THE ALKYL SULFATASE ATSK, A NON-HEME FE (II) ALPHAKETOGLUTARATE DEPENDENT DIOXYGENASE IN COMPLEX                 | OXIDOREDUCTASE                        |

## WITH ALPHAKETOGLUTARATE

|      |                                                                                                                                           |                                       |
|------|-------------------------------------------------------------------------------------------------------------------------------------------|---------------------------------------|
| 10IU | STRUCTURE OF HUMAN THR160-PHOSPHO CDK2/CYCLIN A COMPLEXED WITH A 6-CYCLOHEXYLMETHYLOXY-2-ANILINO-PURINE INHIBITOR                         | KINASE                                |
| 10IY | STRUCTURE OF HUMAN THR160-PHOSPHO CDK2/CYCLIN A COMPLEXED WITH A 6-CYCLOHEXYLMETHYLOXY-2-ANILINO-PURINE INHIBITOR                         | KINASE                                |
| 10J5 | CRYSTAL STRUCTURE OF THE NCO-A1 PAS-B DOMAIN BOUND TO THE STAT6 TRANSACTIVATION DOMAIN LXXLL MOTIF                                        | TRANSCRIPTIONAL COACTIVATOR           |
| 10K7 | A CONSERVED PROTEIN BINDING-SITE ON BACTERIAL SLIDING CLAMPS                                                                              | TRANSFERASE                           |
| 10KK | HOMO-HETERODIMERIC COMPLEX OF THE SRP GTPASES                                                                                             | SIGNAL RECOGNITION/COMPLEX            |
| 10KV | CYCLIN A BINDING GROOVE INHIBITOR H-ARG-ARG-LEU-ILE-PHE-NH2                                                                               | COMPLEX (KINASE/CYCLIN)               |
| 10KW | CYCLIN A BINDING GROOVE INHIBITOR AC-ARG-ARG-LEU-ASN-(M-CL-PHE)-NH2                                                                       | COMPLEX(KINASE/CYCLIN)                |
| 10L1 | CYCLIN A BINDING GROOVE INHIBITOR H-CIT-CIT-LEU-ILE-(P-F-PHE)-NH2                                                                         | COMPLEX(KINASE/CYCLIN)                |
| 10L2 | CYCLIN A BINDING GROOVE INHIBITOR H-ARG-ARG-LEU-ASN-(P-F-PHE)-NH2                                                                         | COMPLEX(KINASE/CYCLIN)                |
| 10L5 | STRUCTURE OF AURORA-A 122-403, PHOSPHORYLATED ON THR287, THR288 AND BOUND TO TPX2 1-43                                                    | COMPLEX(KINASE/CELL DIVISION PROTEIN) |
| 10LA | THE STRUCTURAL BASIS OF MULTISPECIFICITY IN THE OLIGOPEPTIDE-BINDING PROTEIN OPPA                                                         | BINDING PROTEIN                       |
| 10LC | OLIGO-PEPTIDE BINDING PROTEIN (OPPA) COMPLEXED WITH LYS-LYS-LYS-ALA                                                                       | COMPLEX (BINDING PROTEIN/PEPTIDE)     |
| 10LM | SUPERNATANT PROTEIN FACTOR IN COMPLEX WITH RRR-ALPHA-TOCOPHERYLQUINONE: A LINK BETWEEN OXIDIZED VITAMIN E AND CHOLESTEROL BIOSYNTHESIS    | LIPID-BINDING PROTEIN                 |
| 10LS | ROLES OF HIS291-ALPHA AND HIS146-BETA' IN THE REDUCTIVE ACYLATION REACTION CATALYZED BY HUMAN BRANCHED-CHAIN ALPHA-KETOACID DEHYDROGENASE | OXIDOREDUCTASE                        |
| 10LU | ROLES OF HIS291-ALPHA AND HIS146-BETA' IN THE REDUCTIVE ACYLATION REACTION CATALYZED BY HUMAN BRANCHED-CHAIN ALPHA-KETOACID DEHYDROGENASE | OXIDOREDUCTASE                        |
| 10LX | ROLES OF HIS291-ALPHA AND HIS146-BETA' IN THE REDUCTIVE ACYLATION REACTION CATALYZED BY HUMAN BRANCHED-CHAIN ALPHA-KETOACID DEHYDROGENASE | OXIDOREDUCTASE                        |
| 10M3 | FAB 2G12 UNLIGANDED                                                                                                                       | IMMUNE SYSTEM                         |
| 10MW | CRYSTAL STRUCTURE OF THE COMPLEX BETWEEN G PROTEIN-COUPLED RECEPTOR KINASE 2 AND HETEROTRIMERIC G PROTEIN BETA 1 AND GAMMA 2 SUBUNITS     | TRANSFERASE                           |
| 10NK | MISTLETOE LECTIN 1 FROM VISCUM ALBUM                                                                                                      | HYDROLASE/SUGER BINDING PROTEIN       |
| 10NQ | CRYSTAL STRUCTURE OF CD1A IN COMPLEX WITH A SULFATIDE                                                                                     | IMMUNE SYSTEM                         |
| 10O0 | CRYSTAL STRUCTURE OF THE DROSOPHILA MAGO NASHI-Y14 COMPLEX                                                                                | SIGNALING PROTEIN                     |
| 10O4 | P395S MUTANT OF THE P85 REGULATORY SUBUNIT OF THE N-TERMINAL SRC HOMOMOLOGY 2 DOMAIN OF PI3-KINASE COMPLEXED TO                           | PROTEIN BINDING                       |

## A PEPTIDE DERIVED FROM PDGFR

|      |                                                                                                                                       |                                    |
|------|---------------------------------------------------------------------------------------------------------------------------------------|------------------------------------|
| 1009 | ORIENTATION IN SOLUTION OF MMP-3 CATALYTIC DOMAIN AND N-TIMP-1 FROM RESIDUAL DIPOLAR COUPLINGS                                        | HYDROLASE                          |
| 100K | CRYSTAL STRUCTURE OF THE COMPLEX OF PLATELET RECEPTOR GPIB-ALPHA AND HUMAN ALPHA-THROMBIN                                             | HYDROLASE                          |
| 100P | THE CRYSTAL STRUCTURE OF SWINE VESICULAR DISEASE VIRUS                                                                                | VIRUS                              |
| 10P3 | CRYSTAL STRUCTURE OF FAB 2G12 BOUND TO MAN1->2MAN                                                                                     | IMMUNE SYSTEM                      |
| 10P5 | CRYSTAL STRUCTURE OF FAB 2G12 BOUND TO MAN9GLCNAC2                                                                                    | IMMUNE SYSTEM                      |
| 10P9 | COMPLEX OF HUMAN LYSOZYME WITH CAMELID VHH HL6 ANTIBODY FRAGMENT                                                                      | HYDROLASE                          |
| 10PG | OPG2 FAB FRAGMENT                                                                                                                     | IMMUNOGLOBULIN                     |
| 10PH | NON-COVALENT COMPLEX BETWEEN ALPHA-1-PI-PITTSBURGH AND S195A TRYPSIN                                                                  | HYDROLASE/HYDROLASE INHIBITOR      |
| 10QD | CRYSTAL STRUCTURE OF STALL-1 AND BCMA                                                                                                 | IMMUNE RESPONSE                    |
| 10QL | MISTLETOE LECTIN I FROM VISCUM ALBUM COMPLEXED WITH GALACTOSE                                                                         | HYDROLASE/SUGER BINDING PROTEIN    |
| 10QM | A 1:1 COMPLEX BETWEEN ALPHA-LACTALBUMIN AND BETA1,4-GALACTOSYLTRANSFERASE IN THE PRESENCE OF UDP-N-ACETYLGALACTOSAMINE                | TRANSFERASE, BIOSYNTHETIC PROTEIN  |
| 10QN | CRYSTAL STRUCTURE OF THE PHOSPHOTYROSINE BINDING DOMAIN (PTB) OF MOUSE DISABLED 1 (DAB1)                                              | SIGNALING PROTEIN                  |
| 10QO | COMPLEX BETWEEN G0 VERSION OF AN FC BOUND TO A MINIMIZED VERSION OF PROTEIN A CALLED MINI-Z                                           | IMMUNE SYSTEM                      |
| 10QS | CRYSTAL STRUCTURE OF RV4/RV7 COMPLEX                                                                                                  | HYDROLASE                          |
| 10QX | G-2 GLYCOVARIANT OF HUMAN IGG FC BOUND TO MINIMIZED VERSION OF PROTEIN A CALLED Z34C                                                  | IMMUNE SYSTEM                      |
| 10R0 | CRYSTAL STRUCTURES OF GLUTARYL 7-AMINOCEPHALOSPORANIC ACID ACYLASE: INSIGHT INTO AUTOPROTEOLYTIC ACTIVATION                           | HYDROLASE                          |
| 10R7 | CRYSTAL STRUCTURE OF ESCHERICHIA COLI SIGMAE WITH THE CYTOPLASMIC DOMAIN OF ITS ANTI-SIGMA RSEA                                       | TRANSCRIPTION                      |
| 10RS | X-RAY STRUCTURE OF THE KVAP POTASSIUM CHANNEL VOLTAGE SENSOR IN COMPLEX WITH AN FAB                                                   | MEMBRANE PROTEIN                   |
| 10S3 | DEHYDRATED T6 HUMAN INSULIN AT 100 K                                                                                                  | HORMONE/GROWTH FACTOR              |
| 10S4 | DEHYDRATED T6 HUMAN INSULIN AT 295 K                                                                                                  | HORMONE/GROWTH FACTOR              |
| 10SP | CRYSTAL STRUCTURE OF OUTER SURFACE PROTEIN A OF BORRELIA BURGDORFERI COMPLEXED WITH A MURINE MONOCLONAL ANTIBODY FAB                  | COMPLEX (IMMUNOGLOBULIN/LIPOPTEIN) |
| 10SV | STRUCTURAL BASIS FOR BILE ACID BINDING AND ACTIVATION OF THE NUCLEAR RECEPTOR FXR                                                     | DNA BINDING PROTEIN                |
| 10SZ | MHC CLASS I H-2KB HEAVY CHAIN COMPLEXED WITH BETA-2 MICROGLOBULIN AND AN (L4V) MUTANT OF THE VESICULAR STOMATITIS VIRUS NUCLEOPROTEIN | COMPLEX (MHC I/PEPTIDE)            |

|       |                                                                                                                                                                                       |                                   |
|-------|---------------------------------------------------------------------------------------------------------------------------------------------------------------------------------------|-----------------------------------|
| 1OT5  | THE 2.4 ANGSTROM CRYSTAL STRUCTURE OF KEX2 IN COMPLEX WITH A PEPTIDYL-BORONIC ACID INHIBITOR                                                                                          | HYDROLASE                         |
| 1OT7  | STRUCTURAL BASIS FOR 3-DEOXY-CDCA BINDING AND ACTIVATION OF FXR                                                                                                                       | HORMONE/GROWTH FACTOR RECEPTOR    |
| 1OTC  | THE O. NOVA TELOMERE END BINDING PROTEIN COMPLEXED WITH SINGLE STRAND DNA                                                                                                             | PROTEIN/DNA                       |
| 1OTS  | STRUCTURE OF THE ESCHERICHIA COLI CLC CHLORIDE CHANNEL AND FAB COMPLEX                                                                                                                | MEMBRANE PROTEIN                  |
| 1OTT  | STRUCTURE OF THE ESCHERICHIA COLI CLC CHLORIDE CHANNEL E148A MUTANT AND FAB COMPLEX                                                                                                   | MEMBRANE PROTEIN                  |
| 1OUT  | TROUT HEMOGLOBIN I                                                                                                                                                                    | OXYGEN TRANSPORT                  |
| 1OUU  | CARBONMONOXY TROUT HEMOGLOBIN I                                                                                                                                                       | OXYGEN TRANSPORT                  |
| 1OUZ  | CRYSTAL STRUCTURE OF A MUTANT IHF (BETA E44A) COMPLEXED WITH A VARIANT H' SITE (T44A)                                                                                                 | TRANSCRIPTION/DNA                 |
| 1OVL  | CRYSTAL STRUCTURE OF NURR1 LBD                                                                                                                                                        | TRANSCRIPTION                     |
| 1OW0  | CRYSTAL STRUCTURE OF HUMAN FCARI BOUND TO IGA1-FC                                                                                                                                     | IMMUNE SYSTEM                     |
| 1OW3  | CRYSTAL STRUCTURE OF RHOA.GDP.MGF3-IN COMPLEX WITH RHOGAP                                                                                                                             | GENE REGULATION/SIGNALING PROTEIN |
| 1OW6  | PAXILLIN LD4 MOTIF BOUND TO THE FOCAL ADHESION TARGETING (FAT) DOMAIN OF THE FOCAL ADHESION KINASE                                                                                    | TRANSFERASE                       |
| 1OW7  | PAXILLIN LD4 MOTIF BOUND TO THE FOCAL ADHESION TARGETING (FAT) DOMAIN OF THE FOCAL ADHESION KINASE                                                                                    | TRANSFERASE                       |
| 1OW8  | PAXILLIN LD2 MOTIF BOUND TO THE FOCAL ADHESION TARGETING (FAT) DOMAIN OF THE FOCAL ADHESION KINASE                                                                                    | TRANSFERASE                       |
| 1OWF  | CRYSTAL STRUCTURE OF A MUTANT IHF (BETA E44A) COMPLEXED WITH THE NATIVE H' SITE                                                                                                       | TRANSCRIPTION/DNA                 |
| 1OWG  | CRYSTAL STRUCTURE OF WT IHF COMPLEXED WITH AN ALTERED H' SITE (T44A)                                                                                                                  | TRANSCRIPTION/DNA                 |
| 1OWS  | CRYSTAL STRUCTURE OF A C49 PHOSPHOLIPASE A2 FROM INDIAN COBRA REVEALS CARBOHYDRATE BINDING IN THE HYDROPHOBIC CHANNEL                                                                 | HYDROLASE                         |
| 1OX1  | CRYSTAL STRUCTURE OF THE BOVINE TRYPSIN COMPLEX WITH A SYNTHETIC 11 PEPTIDE INHIBITOR                                                                                                 | HYDROLASE                         |
| 1OX4  | TOWARDS UNDERSTANDING THE MECHANISM OF THE COMPLEX CYCLIZATION REACTION CATALYZED BY IMIDAZOLE GLYCEROPHOSPHATE SYNTHASE                                                              | TRANSFERASE, LYASE                |
| 1OX9  | CRYSTAL STRUCTURE OF SSPB-SSRA COMPLEX                                                                                                                                                | HYDROLASE ACTIVATOR               |
| 1OXB  | COMPLEX BETWEEN YPD1 AND SLN1 RESPONSE REGULATOR DOMAIN IN SPACE GROUP P2(1)2(1)2(1)                                                                                                  | SIGNALING PROTEIN                 |
| 1OXG  | CRYSTAL STRUCTURE OF A COMPLEX FORMED BETWEEN ORGANIC SOLVENT TREATED BOVINE ALPHA-CHYMOTRYPSIN AND ITS AUTOCATALYTICALLY PRODUCED HIGHLY POTENT 14-RESIDUE PEPTIDE AT 2.2 RESOLUTION | HYDROLASE                         |
| 1O XK | COMPLEX BETWEEN YPD1 AND SLN1 RESPONSE REGULATOR DOMAIN IN                                                                                                                            | SIGNALING PROTEIN                 |

## SPACE GROUP P3(2)

|      |                                                                                                                                             |                               |
|------|---------------------------------------------------------------------------------------------------------------------------------------------|-------------------------------|
| 1OXN | STRUCTURE AND FUNCTION ANALYSIS OF PEPTIDE ANTAGONISTS OF MELANOMA INHIBITOR OF APOPTOSIS (ML-IAP)                                          | APOPTOSIS                     |
| 1OXQ | STRUCTURE AND FUNCTION ANALYSIS OF PEPTIDE ANTAGONISTS OF MELANOMA INHIBITOR OF APOPTOSIS (ML-IAP)                                          | APOPTOSIS                     |
| 1OY3 | CRYSTAL STRUCTURE OF AN IKKBETA/NF-KB P65 HOMODIMER COMPLEX                                                                                 | DNA BINDING PROTEIN           |
| 1OY7 | STRUCTURE AND FUNCTION ANALYSIS OF PEPTIDE ANTAGONISTS OF MELANOMA INHIBITOR OF APOPTOSIS (ML-IAP)                                          | APOPTOSIS                     |
| 1OYF | CRYSTAL STRUCTURE OF RUSSELLES VIPER (DABOIA RUSSELLII PULCHELLA) PHOSPHOLIPASE A2 IN A COMPLEX WITH VENOM 6-METHYL HEPTANOL                | HYDROLASE                     |
| 1OYT | COMPLEX OF RECOMBINANT HUMAN THROMBIN WITH A DESIGNED FLUORINATED INHIBITOR                                                                 | HYDROLASE                     |
| 1OYV | CRYSTAL STRUCTURE OF TOMATO INHIBITOR-II IN A TERNARY COMPLEX WITH SUBTILISIN CARLSBERG                                                     | HYDROLASE                     |
| 1OZ7 | CRYSTAL STRUCTURE OF ECHICETIN FROM THE VENOM OF INDIAN SAW-SCALED VIPER (ECHIS CARINATUS) AT 2.4 RESOLUTION                                | TOXIN                         |
| 1OZB | CRYSTAL STRUCTURE OF SECB COMPLEXED WITH SECA C-TERMINUS                                                                                    | PROTEIN TRANSPORT             |
| 1P0S | CRYSTAL STRUCTURE OF BLOOD COAGULATION FACTOR XA IN COMPLEX WITH ECOTIN M84R                                                                | HYDROLASE                     |
| 1P13 | CRYSTAL STRUCTURE OF THE SRC SH2 DOMAIN COMPLEXED WITH PEPTIDE (SDPYANFK)                                                                   | TRANSFERASE                   |
| 1P16 | STRUCTURE OF AN MRNA CAPPING ENZYME BOUND TO THE PHOSPHORYLATED CARBOXYL-TERMINAL DOMAIN OF RNA POLYMERASE II                               | TRANSFERASE                   |
| 1P1Z | X-RAY CRYSTAL STRUCTURE OF THE LECTIN-LIKE NATURAL KILLER CELL RECEPTOR LY-49C BOUND TO ITS MHC CLASS I LIGAND H-2KB                        | IMMUNE SYSTEM                 |
| 1P22 | STRUCTURE OF A BETA-TRCP1-SKP1-BETA-CATENIN COMPLEX: DESTRUCTION MOTIF BINDING AND LYSINE SPECIFICITY ON THE SCFBETA-TRCP1 UBIQUITIN LIGASE | SIGNALING PROTEIN             |
| 1P27 | CRYSTAL STRUCTURE OF THE HUMAN Y14/MAGOH COMPLEX                                                                                            | RNA BINDING PROTEIN           |
| 1P2C | CRYSTAL STRUCTURE ANALYSIS OF AN ANTI-LYSOZYME ANTIBODY                                                                                     | IMMUNE SYSTEM/HYDROLASE       |
| 1P2M | STRUCTURAL CONSEQUENCES OF ACCOMMODATION OF FOUR NON-COGNATE AMINO-ACID RESIDUES IN THE S1 POCKET OF BOVINE TRYPSIN AND CHYMOTRYPSIN        | HYDROLASE/HYDROLASE INHIBITOR |
| 1P2N | STRUCTURAL CONSEQUENCES OF ACCOMMODATION OF FOUR NON-COGNATE AMINO-ACID RESIDUES IN THE S1 POCKET OF BOVINE TRYPSIN AND CHYMOTRYPSIN        | HYDROLASE/HYDROLASE INHIBITOR |
| 1P2O | STRUCTURAL CONSEQUENCES OF ACCOMMODATION OF FOUR NON-COGNATE AMINO-ACID RESIDUES IN THE S1 POCKET OF BOVINE TRYPSIN AND CHYMOTRYPSIN        | HYDROLASE/HYDROLASE INHIBITOR |
| 1P2Q | STRUCTURAL CONSEQUENCES OF ACCOMMODATION OF FOUR NON-COGNATE AMINO-ACID RESIDUES IN THE S1 POCKET OF BOVINE TRYPSIN AND CHYMOTRYPSIN        | HYDROLASE/HYDROLASE INHIBITOR |



|      |                                                                                                                                           |                                       |
|------|-------------------------------------------------------------------------------------------------------------------------------------------|---------------------------------------|
| 1P34 | CRYSTALLOGRAPHIC STUDIES OF NUCLEOSOME CORE PARTICLES CONTAINING HISTONE 'SIN' MUTANTS                                                    | STRUCTURAL PROTEIN/DNA                |
| 1P3A | CRYSTALLOGRAPHIC STUDIES OF NUCLEOSOME CORE PARTICLES CONTAINING HISTONE 'SIN' MUTANTS                                                    | STRUCTURAL PROTEIN/DNA                |
| 1P3B | CRYSTALLOGRAPHIC STUDIES OF NUCLEOSOME CORE PARTICLES CONTAINING HISTONE 'SIN' MUTANTS                                                    | STRUCTURAL PROTEIN/DNA                |
| 1P3F | CRYSTALLOGRAPHIC STUDIES OF NUCLEOSOME CORE PARTICLES CONTAINING HISTONE 'SIN' MUTANTS                                                    | STRUCTURAL PROTEIN/DNA                |
| 1P3G | CRYSTALLOGRAPHIC STUDIES OF NUCLEOSOME CORE PARTICLES CONTAINING HISTONE 'SIN' MUTANTS                                                    | STRUCTURAL PROTEIN/DNA                |
| 1P3I | CRYSTALLOGRAPHIC STUDIES OF NUCLEOSOME CORE PARTICLES CONTAINING HISTONE 'SIN' MUTANTS                                                    | STRUCTURAL PROTEIN/DNA                |
| 1P3K | CRYSTALLOGRAPHIC STUDIES OF NUCLEOSOME CORE PARTICLES CONTAINING HISTONE 'SIN' MUTANTS                                                    | STRUCTURAL PROTEIN/DNA                |
| 1P3L | CRYSTALLOGRAPHIC STUDIES OF NUCLEOSOME CORE PARTICLES CONTAINING HISTONE 'SIN' MUTANTS                                                    | STRUCTURAL PROTEIN/DNA                |
| 1P3M | CRYSTALLOGRAPHIC STUDIES OF NUCLEOSOME CORE PARTICLES CONTAINING HISTONE 'SIN' MUTANTS                                                    | STRUCTURAL PROTEIN/DNA                |
| 1P3O | CRYSTALLOGRAPHIC STUDIES OF NUCLEOSOME CORE PARTICLES CONTAINING HISTONE 'SIN' MUTANTS                                                    | STRUCTURAL PROTEIN/DNA                |
| 1P3P | CRYSTALLOGRAPHIC STUDIES OF NUCLEOSOME CORE PARTICLES CONTAINING HISTONE 'SIN' MUTANTS                                                    | STRUCTURAL PROTEIN/DNA                |
| 1P3Q | MECHANISM OF UBIQUITIN RECOGNITION BY THE CUE DOMAIN OF VPS9                                                                              | TRANSLATION                           |
| 1P4B | THREE-DIMENSIONAL STRUCTURE OF A SINGLE CHAIN FV FRAGMENT COMPLEXED WITH THE PEPTIDE GCN4(7P-14P).                                        | IMMUNE SYSTEM                         |
| 1P4E | FLPE W330F MUTANT-DNA HOLLIDAY JUNCTION COMPLEX                                                                                           | DNA BINDING PROTEIN/RECOMBINATION/DNA |
| 1P4L | CRYSTAL STRUCTURE OF NK RECEPTOR LY49C MUTANT WITH ITS MHC CLASS I LIGAND H-2KB                                                           | IMMUNE SYSTEM                         |
| 1P57 | EXTRACELLULAR DOMAIN OF HUMAN HEP SIN                                                                                                     | HYDROLASE                             |
| 1P5E | THE STRUCTURE OF PHOSPHO-CDK2/CYCLIN A IN COMPLEX WITH THE INHIBITOR 4,5,6,7-TETRABROMOBENZOTRIAZOLE (TBS)                                | CELL CYCLE                            |
| 1P7Q | CRYSTAL STRUCTURE OF HLA-A2 BOUND TO LIR-1, A HOST AND VIRAL MHC RECEPTOR                                                                 | IMMUNE SYSTEM                         |
| 1P7T | STRUCTURE OF ESCHERICHIA COLI MALATE SYNTHASE G:PYRUVATE:ACETYL-COENZYME A ABORTIVE TERNARY COMPLEX AT 1.95 ANGSTROM RESOLUTION           | LYASE                                 |
| 1P7V | STRUCTURE OF A COMPLEX FORMED BETWEEN PROTEINASE K AND A DESIGNED HEPTAPEPTIDE INHIBITOR PRO-ALA-PRO-PHE-ALA-ALA-ALA AT ATOMIC RESOLUTION | HYDROLASE                             |
| 1P7W | CRYSTAL STRUCTURE OF THE COMPLEX OF PROTEINASE K WITH A DESIGNED HEPTAPEPTIDE INHIBITOR PRO-ALA-PRO-PHE-ALA-SER-ALA AT ATOMIC RESOLUTION  | HYDROLASE                             |
| 1P84 | HDBT INHIBITED YEAST CYTOCHROME BC1 COMPLEX                                                                                               | OXIDOREDUCTASE                        |

|      |                                                                                                                                                                    |                                        |
|------|--------------------------------------------------------------------------------------------------------------------------------------------------------------------|----------------------------------------|
| 1P8D | X-RAY CRYSTAL STRUCTURE OF LXR LIGAND BINDING DOMAIN WITH 24(S),25-EPOXYCHOLESTEROL                                                                                | MEMBRANE PROTEIN/PROTEIN BINDING       |
| 1P8J | CRYSTAL STRUCTURE OF THE PROPROTEIN CONVERTASE FURIN                                                                                                               | HYDROLASE                              |
| 1P8V | CRYSTAL STRUCTURE OF THE COMPLEX OF PLATELET RECEPTOR GPIB-ALPHA AND ALPHA-THROMBIN AT 2.6A                                                                        | MEMBRANE PROTEIN/HYDROLASE             |
| 1P8Z | COMPLEX BETWEEN RABBIT MUSCLE ALPHA-ACTIN: HUMAN GELSOLIN RESIDUES VAL26-GLU156                                                                                    | STRUCTURAL PROTEIN/CONTRACTILE PROTEIN |
| 1P93 | CRYSTAL STRUCTURE OF THE AGONIST FORM OF GLUCOCORTICOID RECEPTOR                                                                                                   | HORMONE RECEPTOR                       |
| 1P9U | CORONAVIRUS MAIN PROTEINASE (3CLPRO) STRUCTURE: BASIS FOR DESIGN OF ANTI-SARS DRUGS                                                                                | HYDROLASE                              |
| 1PA6 | CRYSTAL STRUCTURE OF THE OXYTRICHA NOVA TELOMERE END-BINDING PROTEIN COMPLEXED WITH NONCOGNATE SSDNA GGGGTTTTGAGG                                                  | DNA BINDING PROTEIN/DNA                |
| 1PAD | BINDING OF CHLOROMETHYL KETONE SUBSTRATE ANALOGUES TO CRYSTALLINE PAPAINE                                                                                          | HYDROLASE (SULFHYDRYL PROTEINASE)      |
| 1PAU | CRYSTAL STRUCTURE OF THE COMPLEX OF APOPAINE WITH THE TETRAPEPTIDE ALDEHYDE INHIBITOR AC-DEVD-CHO                                                                  | COMPLEX (PROTEASE/INHIBITOR)           |
| 1PBX | HAEMOGLOBIN OF THE ANTARCTIC FISH PAGOETHENIA BERNACCHII: AMINO ACID SEQUENCE, OXYGEN EQUILIBRIA AND CRYSTAL STRUCTURE OF ITS CARBONMONOXY DERIVATIVE              | OXYGEN TRANSPORT                       |
| 1PBY | STRUCTURE OF THE PHENYLHYDRAZINE ADDUCT OF THE QUINOHEMOPROTEIN AMINE DEHYDROGENASE FROM PARACOCOCUS DENITRIFICANS AT 1.7 A RESOLUTION                             | OXIDOREDUCTASE                         |
| 1PC8 | CRYSTAL STRUCTURE OF A NOVEL FORM OF MISTLETOE LECTIN FROM HIMALAYAN VISCUM ALBUM L. AT 3.8A RESOLUTION                                                            | HYDROLASE                              |
| 1PCA | THREE DIMENSIONAL STRUCTURE OF PORCINE PANCREATIC PROCARBOXYPEPTIDASE A. A COMPARISON OF THE A AND B ZYMOGENS AND THEIR DETERMINANTS FOR INHIBITION AND ACTIVATION | HYDROLASE(C-TERMINAL PEPTIDASE)        |
| 1PCG | HELIX-STABILIZED CYCLIC PEPTIDES AS SELECTIVE INHIBITORS OF STEROID RECEPTOR-COACTIVATOR INTERACTIONS                                                              | TRANSCRIPTION                          |
| 1PCQ | CRYSTAL STRUCTURE OF GROEL-GROES                                                                                                                                   | CHAPERONE                              |
| 1PCR | STRUCTURE OF THE PHOTOSYNTHETIC REACTION CENTRE FROM RHODOBACTER SPHAEROIDES AT 2.65 ANGSTROMS RESOLUTION: COFACTORS AND PROTEIN-COFACTOR INTERACTIONS             | PHOTOSYNTHETIC REACTION CENTER         |
| 1PCX | CRYSTAL STRUCTURE OF THE COPII COAT SUBUNIT, SEC24, COMPLEXED WITH A PEPTIDE FROM THE SNARE PROTEIN BET1                                                           | TRANSPORT PROTEIN                      |
| 1PD0 | CRYSTAL STRUCTURE OF THE COPII COAT SUBUNIT, SEC24, COMPLEXED WITH A PEPTIDE FROM THE SNARE PROTEIN SED5 (YEAST SYNTAXIN-5)                                        | TRANSPORT PROTEIN                      |
| 1PDK | PAPD-PAPK CHAPERONE-PILUS SUBUNIT COMPLEX FROM E.COLI P PILUS                                                                                                      | CHAPERONE                              |
| 1PDQ | POLYCOMB CHROMODOMAIN COMPLEXED WITH THE HISTONE H3 TAIL CONTAINING TRIMETHYLLYSINE 27.                                                                            | STRUCTURAL PROTEIN                     |

|      |                                                                                                                                                                          |                         |
|------|--------------------------------------------------------------------------------------------------------------------------------------------------------------------------|-------------------------|
| 1PEG | STRUCTURAL BASIS FOR THE PRODUCT SPECIFICITY OF HISTONE LYSINE METHYLTRANSFERASES                                                                                        | TRANSFERASE             |
| 1PEK | STRUCTURE OF THE COMPLEX OF PROTEINASE K WITH A SUBSTRATE-ANALOGUE HEXA-PEPTIDE INHIBITOR AT 2.2 ANGSTROMS RESOLUTION                                                    | HYDROLASE               |
| 1PF9 | GROEL-GROES-ADP                                                                                                                                                          | CHAPERONE               |
| 1PFB | STRUCTURAL BASIS FOR SPECIFIC BINDING OF POLYCOMB CHROMODOMAIN TO HISTONE H3 METHYLATED AT K27                                                                           | PEPTIDE BINDING PROTEIN |
| 1PFG | STRATEGY TO DESIGN INHIBITORS: STRUCTURE OF A COMPLEX OF PROTEINASE K WITH A DESIGNED OCTAPEPTIDE INHIBITOR N-AC-PRO-ALA-PRO-PHE-DALA-ALA-ALA-ALA-NH2 AT 2.5A RESOLUTION | HYDROLASE               |
| 1PG5 | CRYSTAL STRUCTURE OF THE UNLIGATED (T-STATE) ASPARTATE TRANSCARBAMOYLASE FROM THE EXTREMELY THERMOPHILIC ARCHAEON SULFOLOBUS ACIDOCALDARIUS                              | TRANSFERASE             |
| 1PG7 | MURINE 6A6 FAB IN COMPLEX WITH HUMANIZED ANTI-TISSUE FACTOR D3H44 FAB                                                                                                    | IMMUNE SYSTEM           |
| 1PGR | 2:2 COMPLEX OF G-CSF WITH ITS RECEPTOR                                                                                                                                   | CYTOKINE                |
| 1PH1 | CRYSTAL STRUCTURE OF THE OXYTRICHA NOVA TELOMERE END-BINDING PROTEIN COMPLEXED WITH NONCOGNATE SSDNA GGGGTTTGGGGT                                                        | DNA BINDING PROTEIN/DNA |
| 1PH2 | CRYSTAL STRUCTURE OF THE OXYTRICHA NOVA TELOMERE END-BINDING PROTEIN COMPLEXED WITH NONCOGNATE SSDNA GGGGTTTGG                                                           | DNA BINDING PROTEIN/DNA |
| 1PH3 | CRYSTAL STRUCTURE OF THE OXYTRICHA NOVA TELOMERE END-BINDING PROTEIN COMPLEXED WITH NONCOGNATE SSDNA GGGGTTTGGTG                                                         | DNA BINDING PROTEIN/DNA |
| 1PH4 | CRYSTAL STRUCTURE OF THE OXYTRICHA NOVA TELOMERE END-BINDING PROTEIN COMPLEXED WITH NONCOGNATE SSDNA GGGGTTTGGCG                                                         | DNA BINDING PROTEIN/DNA |
| 1PH5 | CRYSTAL STRUCTURE OF THE OXYTRICHA NOVA TELOMERE END-BINDING PROTEIN COMPLEXED WITH NONCOGNATE SSDNA GGGGTTTGG(3DR)GG                                                    | DNA BINDING PROTEIN/DNA |
| 1PH6 | CRYSTAL STRUCTURE OF THE OXYTRICHA NOVA TELOMERE END-BINDING PROTEIN COMPLEXED WITH NONCOGNATE SSDNA GGGGTTTGTGG                                                         | DNA BINDING PROTEIN/DNA |
| 1PH7 | CRYSTAL STRUCTURE OF THE OXYTRICHA NOVA TELOMERE END-BINDING PROTEIN COMPLEXED WITH NONCOGNATE SSDNA GGGGTTTGGIGG                                                        | DNA BINDING PROTEIN/DNA |
| 1PH8 | CRYSTAL STRUCTURE OF THE OXYTRICHA NOVA TELOMERE END-BINDING PROTEIN COMPLEXED WITH NONCOGNATE SSDNA GGGGTTTGGCGG                                                        | DNA BINDING PROTEIN/DNA |
| 1PH9 | CRYSTAL STRUCTURE OF THE OXYTRICHA NOVA TELOMERE END-BINDING PROTEIN COMPLEXED WITH NONCOGNATE SSDNA GGGGTTTGGAGG                                                        | DNA BINDING PROTEIN/DNA |
| 1PHJ | CRYSTAL STRUCTURE OF THE OXYTRICHA NOVA TELOMERE END-BINDING PROTEIN COMPLEXED WITH NONCOGNATE SSDNA GG(3DR)GTTTTGGGG                                                    | DNA BINDING PROTEIN/DNA |
| 1PHN | STRUCTURE OF PHYCOCYANIN FROM CYANIDIUM CALDARIUM AT 1.65A RESOLUTION                                                                                                    | ELECTRON TRANSPORT      |

|      |                                                                                                                                                                                                                           |                                       |
|------|---------------------------------------------------------------------------------------------------------------------------------------------------------------------------------------------------------------------------|---------------------------------------|
| 1PIC | PHOSPHATIDYLINOSITOL 3-KINASE, P85-ALPHA SUBUNIT: C-TERMINAL SH2 DOMAIN COMPLEXED WITH A TYR751 PHOSHOPEPTIDE FROM THE PDGF RECEPTOR, NMR, MINIMIZED MEAN STRUCTURE                                                       | COMPLEX (PHOSPHOTRANSFERASE/RECEPTOR) |
| 1PID | BOVINE DESPENTAPEPTIDE INSULIN                                                                                                                                                                                            | HORMONE                               |
| 1PIN | PIN1 PEPTIDYL-PROLYL CIS-TRANS ISOMERASE FROM HOMO SAPIENS                                                                                                                                                                | COMPLEX (ISOMERASE/DIPEPTIDE)         |
| 1PIP | CRYSTAL STRUCTURE OF PAPAINE-SUCCINYL-GLN-VAL-VAL-ALA-ALA-P-NITROANILIDE COMPLEX AT 1.7 ANGSTROMS RESOLUTION: NONCOVALENT BINDING MODE OF A COMMON SEQUENCE OF ENDOGENOUS THIOL PROTEASE INHIBITORS                       | HYDROLASE(THIOL PROTEASE)             |
| 1PJ8 | STRUCTURE OF A TERNARY COMPLEX OF PROTEINASE K, MERCURY AND A SUBSTRATE-ANALOGUE HEXAPEPTIDE AT 2.2 A RESOLUTION                                                                                                          | HYDROLASE                             |
| 1PJM | MOUSE IMPORTIN ALPHA-BIPARTITE NLS FROM HUMAN RETINOBLASTOMA PROTEIN COMPLEX                                                                                                                                              | PROTEIN TRANSPORT                     |
| 1PJN | MOUSE IMPORTIN ALPHA-BIPARTITE NLS N1N2 FROM XENOPUS LAEVIS PHOSPHOPROTEIN COMPLEX                                                                                                                                        | PROTEIN TRANSPORT                     |
| 1PK0 | CRYSTAL STRUCTURE OF THE EF3-CAM COMPLEXED WITH PMEAPP                                                                                                                                                                    | LYASE/METAL BINDING PROTEIN           |
| 1PK1 | HETERO SAM DOMAIN STRUCTURE OF PH AND SCM.                                                                                                                                                                                | TRANSCRIPTION REPRESSION              |
| 1PKD | THE CRYSTAL STRUCTURE OF UCN-01 IN COMPLEX WITH PHOSPHO-CDK2/CYCLIN A                                                                                                                                                     | TRANSFERASE/CELL CYCLE                |
| 1PKQ | MYELIN OLIGODENDROCYTE GLYCOPROTEIN-(8-18C5) FAB-COMPLEX                                                                                                                                                                  | IMMUNE SYSTEM                         |
| 1PLG | EVIDENCE FOR THE EXTENDED HELICAL NATURE OF POLYSACCHARIDE EPITOPES. THE 2.8 ANGSTROMS RESOLUTION STRUCTURE AND THERMODYNAMICS OF LIGAND BINDING OF AN ANTIGEN BINDING FRAGMENT SPECIFIC FOR ALPHA-(2->8)-POLYSIALIC ACID | IMMUNOGLOBULIN                        |
| 1PMA | PROTEASOME FROM THERMOPLASMA ACIDOPHILUM                                                                                                                                                                                  | PROTEASE                              |
| 1PNK | PENICILLIN ACYLASE HAS A SINGLE-AMINO-ACID CATALYTIC CENTRE                                                                                                                                                               | ANTIBIOTIC RESISTANCE                 |
| 1PNL | PENICILLIN ACYLASE HAS A SINGLE-AMINO-ACID CATALYTIC CENTRE                                                                                                                                                               | ANTIBIOTIC RESISTANCE                 |
| 1PNM | PENICILLIN ACYLASE HAS A SINGLE-AMINO-ACID CATALYTIC CENTRE                                                                                                                                                               | ANTIBIOTIC RESISTANCE                 |
| 1PNS | CRYSTAL STRUCTURE OF A STREPTOMYCIN DEPENDENT RIBOSOME FROM E. COLI, 30S SUBUNIT OF 70S RIBOSOME. THIS FILE, 1PNS, CONTAINS THE 30S SUBUNIT, TWO TRNAS, AND ONE MRNA MOLECULE. THE 50S RIBOSOMAL SUBUNIT IS IN FILE 1PNU. | RIBOSOME                              |
| 1PNX | CRYSTAL STRUCTURE OF THE WILD TYPE RIBOSOME FROM E. COLI, 30S SUBUNIT OF 70S RIBOSOME. THIS FILE, 1PNX, CONTAINS ONLY MOLECULES OF THE 30S RIBOSOMAL SUBUNIT. THE 50S SUBUNIT IS IN THE PDB FILE 1PNY.                    | RIBOSOME                              |
| 1POI | CRYSTAL STRUCTURE OF GLUTACONATE COENZYME A-TRANSFERASE FROM ACIDAMINOCOCCUS FERMENTANS TO 2.55 ANGSTOMS RESOLUTION                                                                                                       | TRANSFERASE                           |
| 1POP | X-RAY CRYSTALLOGRAPHIC STRUCTURE OF A PAPAINE-LEUPEPTIN COMPLEX                                                                                                                                                           | HYDROLASE(THIOL PROTEASE)             |
| 1PP9 | BOVINE CYTOCHROME BC1 COMPLEX WITH STIGMATELLIN BOUND                                                                                                                                                                     | OXIDOREDUCTASE                        |
| 1PPB | THE REFINED 1.9 ANGSTROMS CRYSTAL STRUCTURE OF HUMAN ALPHA-THROMBIN: INTERACTION WITH D-PHE-PRO-ARG                                                                                                                       | HYDROLASE(SERINE PROTEINASE)          |

CHLOROMETHYLKETONE AND SIGNIFICANCE OF THE TYR-PRO-PRO-TRP  
INSERTION SEGMENT

|      |                                                                                                                                                                                                                                                                                    |                                |
|------|------------------------------------------------------------------------------------------------------------------------------------------------------------------------------------------------------------------------------------------------------------------------------------|--------------------------------|
| 1PPE | THE REFINED 2.0 ANGSTROMS X-RAY CRYSTAL STRUCTURE OF THE COMPLEX FORMED BETWEEN BOVINE BETA-TRYPSIN AND CMTI-I, A TRYPSIN INHIBITOR FROM SQUASH SEEDS (CUCURBITA MAXIMA): TOPOLOGICAL SIMILARITY OF THE SQUASH SEED INHIBITORS WITH THE CARBOXYPEPTIDASE A INHIBITOR FROM POTATOES | HYDROLASE(SERINE PROTEINASE)   |
| 1PPF | X-RAY CRYSTAL STRUCTURE OF THE COMPLEX OF HUMAN LEUKOCYTE ELASTASE (PMN ELASTASE) AND THE THIRD DOMAIN OF THE TURKEY OVOMUCOID INHIBITOR                                                                                                                                           | HYDROLASE(SERINE PROTEINASE)   |
| 1PPJ | BOVINE CYTOCHROME BC1 COMPLEX WITH STIGMATELLIN AND ANTIMYCIN                                                                                                                                                                                                                      | OXIDOREDUCTASE                 |
| 1PPK | CRYSTALLOGRAPHIC ANALYSIS OF TRANSITION STATE MIMICS BOUND TO PENICILLOPEPSIN: PHOSPHOROUS-CONTAINING PEPTIDE ANALOGUES                                                                                                                                                            | HYDROLASE(ACID PROTEINASE)     |
| 1PPL | CRYSTALLOGRAPHIC ANALYSIS OF TRANSITION-STATE MIMICS BOUND TO PENICILLOPEPSIN: PHOSPHORUS-CONTAINING PEPTIDE ANALOGUES                                                                                                                                                             | HYDROLASE(ACID PROTEINASE)     |
| 1PPM | CRYSTALLOGRAPHIC ANALYSIS OF TRANSITION-STATE MIMICS BOUND TO PENICILLOPEPSIN: PHOSPHORUS-CONTAINING PEPTIDE ANALOGUES                                                                                                                                                             | HYDROLASE(ACID PROTEINASE)     |
| 1PQ1 | CRYSTAL STRUCTURE OF BCL-XL/BIM                                                                                                                                                                                                                                                    | APOPTOSIS                      |
| 1PQ8 | TRYPSIN AT PH 4 AT ATOMIC RESOLUTION                                                                                                                                                                                                                                               | HYDROLASE                      |
| 1PRC | CRYSTALLOGRAPHIC REFINEMENT AT 2.3 ANGSTROMS RESOLUTION AND REFINED MODEL OF THE PHOTOSYNTHETIC REACTION CENTER FROM RHODOPSEUDOMONAS VIRIDIS                                                                                                                                      | PHOTOSYNTHETIC REACTION CENTER |
| 1PRT | THE CRYSTAL STRUCTURE OF PERTUSSIS TOXIN                                                                                                                                                                                                                                           | TOXIN                          |
| 1PSA | STRUCTURE OF A PEPSIN(SLASH)RENIN INHIBITOR COMPLEX REVEALS A NOVEL CRYSTAL PACKING INDUCED BY MINOR CHEMICAL ALTERATIONS IN THE INHIBITOR                                                                                                                                         | HYDROLASE(ACID PROTEINASE)     |
| 1PSK | THE CRYSTAL STRUCTURE OF AN FAB FRAGMENT THAT BINDS TO THE MELANOMA-ASSOCIATED GD2 GANGLIOSIDE                                                                                                                                                                                     | IMMUNOGLOBULIN                 |
| 1PSO | THE CRYSTAL STRUCTURE OF HUMAN PEPSIN AND ITS COMPLEX WITH PEPSTATIN                                                                                                                                                                                                               | HYDROLASE (ACID PROTEINASE)    |
| 1PSS | CRYSTALLOGRAPHIC ANALYSES OF SITE-DIRECTED MUTANTS OF THE PHOTOSYNTHETIC REACTION CENTER FROM RHODOBACTER SPHAEROIDES                                                                                                                                                              | PHOTOSYNTHETIC REACTION CENTER |
| 1PST | CRYSTALLOGRAPHIC ANALYSES OF SITE-DIRECTED MUTANTS OF THE PHOTOSYNTHETIC REACTION CENTER FROM RHODOBACTER SPHAEROIDES                                                                                                                                                              | PHOTOSYNTHETIC REACTION CENTER |
| 1PTJ | CRYSTAL STRUCTURE ANALYSIS OF THE DI AND DIII COMPLEX OF TRANSHYDROGENASE WITH A THIO-NICOTINAMIDE NUCLEOTIDE ANALOGUE                                                                                                                                                             | OXIDOREDUCTASE                 |
| 1PTO | THE STRUCTURE OF A PERTUSSIS TOXIN-SUGAR COMPLEX AS A MODEL FOR RECEPTOR BINDING                                                                                                                                                                                                   | TOXIN                          |
| 1PTT | CRYSTAL STRUCTURE OF PROTEIN TYROSINE PHOSPHATASE 1B COMPLEXED WITH PHOSPHOTYROSINE-CONTAINING TETRA-PEPTIDE (AC-DEPYL-NH2)                                                                                                                                                        | COMPLEX (HYDROLASE/PEPTIDE)    |
| 1PTU | CRYSTAL STRUCTURE OF PROTEIN TYROSINE PHOSPHATASE 1B COMPLEXED WITH PHOSPHOTYROSINE-CONTAINING HEXA-PEPTIDE                                                                                                                                                                        | COMPLEX (HYDROLASE/PEPTIDE)    |

(DADEPYL-NH<sub>2</sub>)

|      |                                                                                                                                                                                              |                                     |
|------|----------------------------------------------------------------------------------------------------------------------------------------------------------------------------------------------|-------------------------------------|
| 1PU9 | CRYSTAL STRUCTURE OF TETRAHYMENA GCN5 WITH BOUND COENZYME A AND A 19-RESIDUE HISTONE H3 PEPTIDE                                                                                              | TRANSFERASE/STRUCTURAL PROTEIN      |
| 1PUA | CRYSTAL STRUCTURE OF TETRAHYMENA GCN5 WITH BOUND COENZYME A AND A PHOSPHORYLATED, 19-RESIDUE HISTONE H3 PEPTIDE                                                                              | TRANSFERASE/STRUCTURAL PROTEIN      |
| 1PUF | CRYSTAL STRUCTURE OF HOXA9 AND PBX1 HOMEODOMAINS BOUND TO DNA                                                                                                                                | TRANSCRIPTION/DNA                   |
| 1PUM | MISTLETOE LECTIN I IN COMPLEX WITH GALACTOSE                                                                                                                                                 | SUGAR BINDING PROTEIN               |
| 1PUU | MISTLETOE LECTIN I IN COMPLEX WITH LACTOSE                                                                                                                                                   | SUGAR BINDING PROTEIN               |
| 1PVH | CRYSTAL STRUCTURE OF LEUKEMIA INHIBITORY FACTOR IN COMPLEX WITH GP130                                                                                                                        | SIGNALING PROTEIN/CYTOKINE          |
| 1PWW | CRYSTAL STRUCTURE OF ANTHRAX LETHAL FACTOR ACTIVE SITE MUTANT PROTEIN COMPLEXED WITH AN OPTIMISED PEPTIDE SUBSTRATE IN THE PRESENCE OF ZINC.                                                 | HYDROLASE                           |
| 1PXV | THE STAPHOSTATIN-STAPHOPAIN COMPLEX: A FORWARD BINDING INHIBITOR IN COMPLEX WITH ITS TARGET CYSTEINE PROTEASE                                                                                | HYDROLASE                           |
| 1PY1 | COMPLEX OF GGA1-VHS DOMAIN AND BETA-SECRETASE C-TERMINAL PHOSHOPEPTIDE                                                                                                                       | PROTEIN TRANSPORT                   |
| 1PYA | REFINED STRUCTURE OF THE PYRUVOYL-DEPENDENT HISTIDINE DECARBOXYLASE FROM LACTOBACILLUS 30A                                                                                                   | CARBOXY-LYASE                       |
| 1PYO | CRYSTAL STRUCTURE OF HUMAN CASPASE-2 IN COMPLEX WITH ACETYL-LEU-ASP-GLU-SER-ASP-CHO                                                                                                          | HYDROLASE                           |
| 1PYT | TERNARY COMPLEX OF PROCARBOXYPEPTIDASE A, PROPROTEINASE E, AND CHYMOTRYPSINOGEN C                                                                                                            | TERNARY COMPLEX (ZYMOGEN)           |
| 1PYU | PROCESSED ASPARTATE DECARBOXYLASE MUTANT WITH SER25 MUTATED TO CYS                                                                                                                           | LYASE                               |
| 1PYW | HUMAN CLASS II MHC PROTEIN HLA-DR1 BOUND TO A DESIGNED PEPTIDE RELATED TO INFLUENZA VIRUS HEMAGGLUTININ, FVKQNA(MAA)AL, IN COMPLEX WITH STAPHYLOCOCCAL ENTEROTOXIN C3 VARIANT 3B2 (SEC3-3B2) | IMMUNE SYSTEM/PROTEIN BINDING/TOXIN |
| 1PZ5 | STRUCTURAL BASIS OF PEPTIDE-CARBOHYDRATE MIMICRY IN AN ANTIBODY COMBINING SITE                                                                                                               | IMMUNE SYSTEM                       |
| 1PZL | CRYSTAL STRUCTURE OF HNF4A LBD IN COMPLEX WITH THE LIGAND AND THE COACTIVATOR SRC-1 PEPTIDE                                                                                                  | TRANSCRIPTION                       |
| 1PZY | W314A-BETA1,4-GALACTOSYLTRANSFERASE-1 COMPLEXED WITH ALPHA-LACTALBUMIN IN THE PRESENCE OF N-ACETYLGLUCOSAMINE, UDP AND MANGANESE                                                             | TRANSFERASE ACTIVATOR/TRANSFERASE   |
| 1Q0X | ANTI-MORPHINE ANTIBODY 9B1 UNLIGANDED FORM                                                                                                                                                   | IMMUNE SYSTEM                       |
| 1Q0Y | ANTI-MORPHINE ANTIBODY 9B1 COMPLEXED WITH MORPHINE                                                                                                                                           | IMMUNE SYSTEM                       |
| 1Q16 | CRYSTAL STRUCTURE OF NITRATE REDUCTASE A, NARGH1, FROM ESCHERICHIA COLI                                                                                                                      | OXIDOREDUCTASE                      |
| 1Q1A | STRUCTURE OF THE YEAST HST2 PROTEIN DEACETYLASE IN TERNARY COMPLEX WITH 2'-O-ACETYL ADP RIBOSE AND HISTONE PEPTIDE                                                                           | GENE REGULATION                     |

|      |                                                                                                                                                |                                   |
|------|------------------------------------------------------------------------------------------------------------------------------------------------|-----------------------------------|
| 1Q1J | CRYSTAL STRUCTURE ANALYSIS OF ANTI-HIV-1 FAB 447-52D IN COMPLEX WITH V3 PEPTIDE                                                                | IMMUNE SYSTEM                     |
| 1Q1S | MOUSE IMPORTIN ALPHA- PHOSPHORYLATED SV40 CN PEPTIDE COMPLEX                                                                                   | PROTEIN TRANSPORT                 |
| 1Q1T | MOUSE IMPORTIN ALPHA: NON-PHOSPHORYLATED SV40 CN PEPTIDE COMPLEX                                                                               | PROTEIN TRANSPORT                 |
| 1Q2C | CRYSTAL STRUCTURE OF TETRAHYMENA GCN5 WITH BOUND COENZYME A AND A 19-RESIDUE HISTONE H4 PEPTIDE                                                | TRANSFERASE/STRUCTURAL PROTEIN    |
| 1Q2D | CRYSTAL STRUCTURE OF TETRAHYMENA GCN5 WITH BOUND COENZYME A AND A 19-RESIDUE P53 PEPTIDE                                                       | TRANSFERASE/STRUCTURAL PROTEIN    |
| 1Q3L | CHROMODOMAIN OF HP1 COMPLEXED WITH HISTONE H3 TAIL CONTAINING MONOMETHYLLYSINE 9.                                                              | STRUCTURAL PROTEIN                |
| 1Q3P | CRYSTAL STRUCTURE OF THE SHANK PDZ-LIGAND COMPLEX REVEALS A CLASS I PDZ INTERACTION AND A NOVEL PDZ-PDZ DIMERIZATION                           | PEPTIDE BINDING PROTEIN           |
| 1Q40 | CRYSTAL STRUCTURE OF THE C. ALBICANS MTR2-MEX67 M DOMAIN COMPLEX                                                                               | TRANSLATION                       |
| 1Q4K | THE POLO-BOX DOMAIN OF PLK1 IN COMPLEX WITH A PHOSPHO-PEPTIDE                                                                                  | TRANSFERASE                       |
| 1Q4Q | CRYSTAL STRUCTURE OF A DIAP1-DRONC COMPLEX                                                                                                     | APOPTOSIS INHIBITOR               |
| 1Q4V | CRYSTAL STRUCTURE OF ALLO-ILEA2-INSULIN, AN INACTIVE CHIRAL ANALOGUE: IMPLICATIONS FOR THE MECHANISM OF RECEPTOR                               | HORMONE/GROWTH FACTOR             |
| 1Q5Q | THE RHODOCOCCUS 20S PROTEASOME                                                                                                                 | HYDROLASE                         |
| 1Q5R | THE RHODOCOCCUS 20S PROTEASOME WITH UNPROCESSED PRO-PEPTIDES                                                                                   | HYDROLASE                         |
| 1Q6I | PKA TRIPLE MUTANT MODEL OF PKB                                                                                                                 | TRANSFERASE/TRANSFERASE INHIBITOR |
| 1Q72 | ANTI-COCAINE ANTIBODY M82G2 COMPLEXED WITH COCAINE                                                                                             | IMMUNE SYSTEM                     |
| 1Q7L | ZN-BINDING DOMAIN OF THE T347G MUTANT OF HUMAN AMINOACYLASE-I                                                                                  | HYDROLASE                         |
| 1Q7Y | CRYSTAL STRUCTURE OF CCDAP-PUROMYCIN BOUND AT THE PEPTIDYL TRANSFERASE CENTER OF THE 50S RIBOSOMAL SUBUNIT                                     | RIBOSOME                          |
| 1Q81 | CRYSTAL STRUCTURE OF MINIHHELIX WITH 3' PUROMYCIN BOUND TO A-SITE OF THE 50S RIBOSOMAL SUBUNIT.                                                | RIBOSOME                          |
| 1Q82 | CRYSTAL STRUCTURE OF CC-PUROMYCIN BOUND TO THE A-SITE OF THE 50S RIBOSOMAL SUBUNIT                                                             | RIBOSOME                          |
| 1Q86 | CRYSTAL STRUCTURE OF CCA-PHE-CAP-BIOTIN BOUND SIMULTANEOUSLY AT HALF OCCUPANCY TO BOTH THE A-SITE AND P-SITE OF THE THE 50S RIBOSOMAL SUBUNIT. | RIBOSOME                          |
| 1Q8T | THE CATALYTIC SUBUNIT OF CAMP-DEPENDENT PROTEIN KINASE (PKA) IN COMPLEX WITH RHO-KINASE INHIBITOR Y-27632                                      | TRANSFERASE/TRANSFERASE INHIBITOR |
| 1Q8U | THE CATALYTIC SUBUNIT OF CAMP-DEPENDENT PROTEIN KINASE IN COMPLEX WITH RHO-KINASE INHIBITOR H-1152P                                            | TRANSFERASE/TRANSFERASE INHIBITOR |
| 1Q90 | STRUCTURE OF THE CYTOCHROME B6F (PLASTOHYDROQUINONE : PLASTOCYANIN OXIDOREDUCTASE) FROM CHLAMYDOMONAS REINHARDTII                              | PHOTOSYNTHESIS                    |
| 1Q94 | STRUCTURES OF HLA-A*1101 IN COMPLEX WITH IMMUNODOMINANT                                                                                        | IMMUNE SYSTEM                     |

## NONAMER AND DECAMER HIV-1 EPITOPES CLEARLY REVEAL THE PRESENCE OF A MIDDLE ANCHOR RESIDUE

|      |                                                                                                                                                 |                                   |
|------|-------------------------------------------------------------------------------------------------------------------------------------------------|-----------------------------------|
| 1Q95 | ASPARTATE TRANSCARBAMYLASE (ATCASE) OF ESCHERICHIA COLI: A NEW CRYSTALLINE R STATE BOUND TO PALA, OR TO PRODUCT ANALOGUES PHOSPHATE AND CITRATE | TRANSFERASE                       |
| 1Q9K | S25-2 FAB UNLIGANDED 1                                                                                                                          | IMMUNE SYSTEM                     |
| 1Q9L | S25-2 FAB UNLIGANDED 2                                                                                                                          | IMMUNE SYSTEM                     |
| 1Q9O | S45-18 FAB UNLIGANDED                                                                                                                           | IMMUNE SYSTEM                     |
| 1Q9Q | S25-2- A(2-8)-A(2-4)KDO TRISACCHARIDE COMPLEX                                                                                                   | IMMUNE SYSTEM                     |
| 1Q9R | S25-2- A(2-8)KDO DISACCHARIDE COMPLEX                                                                                                           | IMMUNE SYSTEM                     |
| 1Q9T | S25-2- A(2-4)KDO DISACCHARIDE COMPLEX                                                                                                           | IMMUNE SYSTEM                     |
| 1Q9V | S25-2- KDO MONOSACCHARIDE COMPLEX                                                                                                               | IMMUNE SYSTEM                     |
| 1Q9W | S45-18 FAB PENTASACCHARIDE BISPHOSPHATE COMPLEX                                                                                                 | IMMUNE SYSTEM                     |
| 1QAB | THE STRUCTURE OF HUMAN RETINOL BINDING PROTEIN WITH ITS CARRIER PROTEIN TRANSTHYRETIN REVEALS INTERACTION WITH THE CARBOXY TERMINUS OF RBP      | TRANSPORT PROTEIN                 |
| 1QAV | UNEXPECTED MODES OF PDZ DOMAIN SCAFFOLDING REVEALED BY STRUCTURE OF NNOS-SYNTROPHIN COMPLEX                                                     | MEMBRANE PROTEIN/OXIDOREDUCTASE   |
| 1QBK | STRUCTURE OF THE KARYOPHERIN BETA2-RAN GPPNHP NUCLEAR TRANSPORT COMPLEX                                                                         | NUCLEAR TRANSPORT PROTEIN COMPLEX |
| 1QBL | FAB E8 (FABE8A) X-RAY STRUCTURE AT 2.26 ANGSTROM RESOLUTION                                                                                     | IMMUNOGLOBULIN                    |
| 1QBM | FAB E8B ANTIBODY, X-RAY STRUCTURE AT 2.37 ANGSTROMS RESOLUTION                                                                                  | IMMUNOGLOBULIN                    |
| 1QBQ | STRUCTURE OF RAT FARNESYL PROTEIN TRANSFERASE COMPLEXED WITH A CVIM PEPTIDE AND ALPHA-HYDROXYFARNESYLPHOSPHONIC ACID.                           | TRANSFERASE                       |
| 1QBV | CRYSTAL STRUCTURE OF THROMBIN COMPLEXED WITH AN GUANIDINE-MIMETIC INHIBITOR                                                                     | HYDROLASE                         |
| 1QC5 | I DOMAIN FROM INTEGRIN ALPHA1-BETA1                                                                                                             | CELL ADHESION                     |
| 1QD6 | OUTER MEMBRANE PHOSPHOLIPASE A FROM ESCHERICHIA COLI                                                                                            | MEMBRANE PROTEIN                  |
| 1QDL | THE CRYSTAL STRUCTURE OF ANTHRANILATE SYNTHASE FROM SULFOLOBUS SOLFATARICUS                                                                     | LYASE                             |
| 1QDU | CRYSTAL STRUCTURE OF THE COMPLEX OF CASPASE-8 WITH THE TRIPEPTIDE KETONE INHIBITOR ZEVD-DCBMK                                                   | HYDROLASE                         |
| 1QE1 | CRYSTAL STRUCTURE OF 3TC-RESISTANT M184I MUTANT OF HIV-1 REVERSE TRANSCRIPTASE                                                                  | TRANSFERASE                       |
| 1QEW | HUMAN CLASS I HISTOCOMPATIBILITY ANTIGEN (HLA-A 0201) COMPLEX WITH A NONAMERIC PEPTIDE FROM MELANOMA-ASSOCIATED ANTIGEN 3 (RESIDUES 271-279)    | COMPLEX (MHC PROTEINTIGEN)        |
| 1QFK | STRUCTURE OF HUMAN FACTOR VIIA AND ITS IMPLICATIONS FOR THE TRIGGERING OF BLOOD COAGULATION                                                     | SERINE PROTEASE                   |



|      |                                                                                                                                                                    |                                       |
|------|--------------------------------------------------------------------------------------------------------------------------------------------------------------------|---------------------------------------|
| 1QFU | INFLUENZA VIRUS HEMAGGLUTININ COMPLEXED WITH A NEUTRALIZING ANTIBODY                                                                                               | VIRAL PROTEIN/IMMUNE SYSTEM           |
| 1QGE | NEW CRYSTAL FORM OF PSEUDOMONAS GLUMAE (FORMERLY CHROMOBACTERIUM VISCOSUM ATCC 6918) LIPASE                                                                        | HYDROLASE                             |
| 1QGK | STRUCTURE OF IMPORTIN BETA BOUND TO THE IBB DOMAIN OF IMPORTIN ALPHA                                                                                               | TRANSPORT RECEPTOR                    |
| 1QGR | STRUCTURE OF IMPORTIN BETA BOUND TO THE IBB DOMAIN OF IMPORTIN ALPHA (II CRYSTAL FORM, GROWN AT LOW PH)                                                            | TRANSPORT RECEPTOR                    |
| 1QGU | NITROGENASE MO-FE PROTEIN FROM KLEBSIELLA PNEUMONIAE, DITHIONITE-REDUCED STATE                                                                                     | OXIDOREDUCTASE                        |
| 1QGW | CRYSTAL STRUCTURE OF PHYCOERYTHRIN 545 FROM THE MARINE CRYPTOPHYTE RHODOMONAS CS24                                                                                 | PHOTOSYNTHESIS                        |
| 1QH1 | NITROGENASE MOFE PROTEIN FROM KLEBSIELLA PNEUMONIAE, PHENOSAFRANIN OXIDIZED STATE                                                                                  | OXIDOREDUCTASE                        |
| 1QH8 | NITROGENASE MOFE PROTEIN FROM KLEBSIELLA PNEUMONIAE, AS-CRYSTALLIZED (MIXED OXIDATION) STATE                                                                       | OXIDOREDUCTASE                        |
| 1QHH | STRUCTURE OF DNA HELICASE WITH ADPNP                                                                                                                               | HYDROLASE                             |
| 1QHR | NOVEL COVALENT ACTIVE SITE THROMBIN INHIBITORS                                                                                                                     | BLOOD CLOTTING                        |
| 1QI8 | DEOXYGENATED STRUCTURE OF A DISTAL POCKET HEMOGLOBIN MUTANT                                                                                                        | OXYGEN STORAGE/TRANSPORT              |
| 1QIY | HUMAN INSULIN HEXAMERS WITH CHAIN B HIS MUTATED TO TYR COMPLEXED WITH PHENOL                                                                                       | HORMONE                               |
| 1QIZ | HUMAN INSULIN HEXAMERS WITH CHAIN B HIS MUTATED TO TYR COMPLEXED WITH RESORCINOL                                                                                   | HORMONE                               |
| 1QJ0 | HUMAN INSULIN HEXAMERS WITH CHAIN B HIS MUTATED TO TYR                                                                                                             | HORMONE                               |
| 1QJ1 | NOVEL COVALENT ACTIVE SITE THROMBIN INHIBITORS                                                                                                                     | COMPLEX (BLOOD COAGULATION/INHIBITOR) |
| 1QJ6 | NOVEL COVALENT ACTIVE SITE THROMBIN INHIBITORS                                                                                                                     | COMPLEX (BLOOD COAGULATION/INHIBITOR) |
| 1QJ7 | NOVEL COVALENT ACTIVE SITE THROMBIN INHIBITORS                                                                                                                     | COMPLEX (BLOOD COAGULATION/INHIBITOR) |
| 1QJA | 14-3-3 ZETA/PHOSPHOPEPTIDE COMPLEX (MODE 2)                                                                                                                        | COMPLEX (SIGNAL TRANSDUCTION/PEPTIDE) |
| 1QJB | 14-3-3 ZETA/PHOSPHOPEPTIDE COMPLEX (MODE 1)                                                                                                                        | COMPLEX (SIGNAL TRANSDUCTION/PEPTIDE) |
| 1QJJ | STRUCTURE OF ASTACIN WITH A HYDROXAMIC ACID INHIBITOR                                                                                                              | HYDROLASE(METALLOPROTEINASE)          |
| 1QKA | OLIGO-PEPTIDE BINDING PROTEIN (OPPA) COMPLEXED WITH KRK                                                                                                            | COMPLEX (PEPTIDE TRANSPORT/PEPTIDE)   |
| 1QKB | OLIGO-PEPTIDE BINDING PROTEIN (OPPA) COMPLEXED WITH KVK                                                                                                            | COMPLEX (PEPTIDE TRANSPORT/PEPTIDE)   |
| 1QKZ | FAB FRAGMENT (MN14C11.6) IN COMPLEX WITH A PEPTIDE ANTIGEN DERIVED FROM NEISSERIA MENINGITIDIS P1.7 SEROSUBTYPE ANTIGEN AND DOMAIN II FROM STREPTOCOCCAL PROTEIN G | IMMUNE SYSTEM                         |
| 1QLB | RESPIRATORY COMPLEX II-LIKE FUMARATE REDUCTASE FROM WOLINELLA SUCCINOGENES                                                                                         | OXIDOREDUCTASE                        |
| 1QLE | CRYO-STRUCTURE OF THE PARACOCCUS DENITRIFICANS FOUR-SUBUNIT CYTOCHROME C OXIDASE IN THE COMPLETELY OXIDIZED STATE COMPLEXED WITH AN ANTIBODY FV FRAGMENT           | COMPLEX (OXIDOREDUCTASE/ANTIBODY)     |

|      |                                                                                                                            |                                       |
|------|----------------------------------------------------------------------------------------------------------------------------|---------------------------------------|
| 1QLF | MHC CLASS I H-2DB COMPLEXED WITH GLYCOPEPTIDE K3G                                                                          | MURINE CLASS I MHC/PEPTIDE COMPLEX    |
| 1QLR | CRYSTAL STRUCTURE OF THE FAB FRAGMENT OF A HUMAN MONOCLONAL IGM COLD AGGLUTININ                                            | IMMUNOGLOBULIN                        |
| 1QLS | S100C (S100A11),OR CALGIZZARIN, IN COMPLEX WITH ANNEXIN I N-TERMINUS                                                       | COMPLEX (LIGAND/ANNEXIN)              |
| 1QMB | CLEAVED ALPHA-1-ANTITRYPSIN POLYMER                                                                                        | SERINE PROTEASE INHIBITOR             |
| 1QMZ | PHOSPHORYLATED CDK2-CYCLIN A-SUBSTRATE PEPTIDE COMPLEX                                                                     | COMPLEX (PROTEIN KINASE/CYCLIN)       |
| 1QNH | PLASMODIUM FALCIPARUM CYCLOPHILIN (DOUBLE MUTANT) COMPLEXED WITH CYCLOSPORIN A                                             | COMPLEX (ISOMERASE/IMMUNOSUPPRESSANT) |
| 1QO0 | AMIDE RECEPTOR OF THE AMIDASE OPERON OF PSEUDOMONAS AERUGINOSA (AMIC) COMPLEXED WITH THE NEGATIVE REGULATOR AMIR.          | BINDING PROTEIN                       |
| 1QO3 | COMPLEX BETWEEN NK CELL RECEPTOR LY49A AND ITS MHC CLASS I LIGAND H-2DD                                                    | COMPLEX (NK RECEPTOR/MHC CLASS I)     |
| 1QOP | CRYSTAL STRUCTURE OF WILD-TYPE TRYPTOPHAN SYNTHASE COMPLEXED WITH INDOLE PROPANOL PHOSPHATE                                | LYASE                                 |
| 1QOQ | CRYSTAL STRUCTURE OF WILD-TYPE TRYPTOPHAN SYNTHASE COMPLEXED WITH INDOLE GLYCEROL PHOSPHATE                                | LYASE                                 |
| 1QOV | PHOTOSYNTHETIC REACTION CENTER MUTANT WITH ALA M260 REPLACED WITH TRP (CHAIN M, A260W)                                     | PHOTOSYNTHETIC REACTION CENTER        |
| 1QPW | CRYSTAL STRUCTURE DETERMINATION OF PORCINE HEMOGLOBIN AT 1.8A RESOLUTION                                                   | OXYGEN TRANSPORT                      |
| 1QQD | CRYSTAL STRUCTURE OF HLA-CW4, A LIGAND FOR THE KIR2D NATURAL KILLER CELL INHIBITORY RECEPTOR                               | IMMUNE SYSTEM                         |
| 1QR1 | POOR BINDING OF A HER-2/NEU EPIOTOPE (GP2) TO HLA-A2.1 IS DUE TO A LACK OF INTERACTIONS IN THE CENTER OF THE PEPTIDE       | IMMUNE SYSTEM                         |
| 1QRJ | SOLUTION STRUCTURE OF HTLV-1 CAPSID PROTEIN                                                                                | VIRAL PROTEIN                         |
| 1QRN | CRYSTAL STRUCTURE OF HUMAN A6 TCR COMPLEXED WITH HLA-A2 BOUND TO ALTERED HTLV-1 TAX PEPTIDE P6A                            | IMMUNE SYSTEM                         |
| 1QRP | HUMAN PEPSIN 3A IN COMPLEX WITH A PHOSPHONATE INHIBITOR IVA-VAL-VAL-LEU(P)-(O) PHE-ALA-ALA-OME                             | HYDROLASE/HYDROLASE INHIBITOR         |
| 1QS0 | CRYSTAL STRUCTURE OF PSEUDOMONAS PUTIDA 2-OXOISOVALERATE DEHYDROGENASE (BRANCHED-CHAIN ALPHA-KETO ACID DEHYDROGENASE, E1B) | OXIDOREDUCTASE                        |
| 1QS7 | THE 1.8 ANGSTROM STRUCTURE OF CALMODULIN RS20 PEPTIDE COMPLEX                                                              | METAL BINDING PROTEIN/PEPTIDE         |
| 1QS8 | CRYSTAL STRUCTURE OF THE P. VIVAX ASPARTIC PROTEINASE PLASMEPSIN COMPLEXED WITH THE INHIBITOR PEPSTATIN A                  | HYDROLASE                             |
| 1QSC | CRYSTAL STRUCTURE OF THE TRAF DOMAIN OF TRAF2 IN A COMPLEX WITH A PEPTIDE FROM THE CD40 RECEPTOR                           | SIGNALING PROTEIN                     |
| 1QSE | STRUCTURE OF HUMAN A6-TCR BOUND TO HLA-A2 COMPLEXED WITH ALTERED HTLV-1 TAX PEPTIDE V7R                                    | IMMUNE SYSTEM                         |
| 1QSF | STRUCTURE OF A6-TCR BOUND TO HLA-A2 COMPLEXED WITH ALTERED                                                                 | IMMUNE SYSTEM                         |

## HTLV-1 TAX PEPTIDE Y8A

|      |                                                                                                                                                   |                                |
|------|---------------------------------------------------------------------------------------------------------------------------------------------------|--------------------------------|
| 1QSH | MAGNESIUM(II)-AND ZINC(II)-PROTOPORPHYRIN IX'S STABILIZE THE LOWEST OXYGEN AFFINITY STATE OF HUMAN HEMOGLOBIN EVEN MORE STRONGLY THAN DEOXYHEME   | OXYGEN STORAGE/TRANSPORT       |
| 1QSI | MAGNESIUM(II)-AND ZINC(II)-PROTOPORPHYRIN IX'S STABILIZE THE LOWEST OXYGEN AFFINITY STATE OF HUMAN HEMOGLOBIN EVEN MORE STRONGLY THAN DEOXYHEME   | OXYGEN STORAGE/TRANSPORT       |
| 1QSN | CRYSTAL STRUCTURE OF TETRAHYMENA GCN5 WITH BOUND COENZYME A AND HISTONE H3 PEPTIDE                                                                | TRANSFERASE                    |
| 1QTN | CRYSTAL STRUCTURE OF THE COMPLEX OF CASPASE-8 WITH THE TETRAPEPTIDE INHIBITOR ACE-IETD-ALDEHYDE                                                   | APOPTOSIS                      |
| 1QTX | THE 1.65 ANGSTROM STRUCTURE OF CALMODULIN RS20 PEPTIDE COMPLEX                                                                                    | SIGNALING PROTEIN              |
| 1QTY | VASCULAR ENDOTHELIAL GROWTH FACTOR IN COMPLEX WITH DOMAIN 2 OF THE FLT-1 RECEPTOR                                                                 | HORMONE/GROWTH FACTOR RECEPTOR |
| 1QUN | X-RAY STRUCTURE OF THE FIMC-FIMH CHAPERONE ADHESIN COMPLEX FROM UROPATHOGENIC E.COLI                                                              | CHAPERONE/STRUCTURAL PROTEIN   |
| 1QUQ | COMPLEX OF REPLICATION PROTEIN A SUBUNITS RPA14 AND RPA32                                                                                         | DNA-BINDING PROTEIN            |
| 1QUR | HUMAN ALPHA-THROMBIN IN COMPLEX WITH BIVALENT, BENZAMIDINE-BASED SYNTHETIC INHIBITOR                                                              | HYDROLASE/HYDROLASE INHIBITOR  |
| 1QVF | STRUCTURE OF A DEACYLATED TRNA MINIHILIX BOUND TO THE E SITE OF THE LARGE RIBOSOMAL SUBUNIT OF HALOARCUA MARISMORTUI                              | RIBOSOME                       |
| 1QVG | STRUCTURE OF CCA OLIGONUCLEOTIDE BOUND TO THE TRNA BINDING SITES OF THE LARGE RIBOSOMAL SUBUNIT OF HALOARCUA MARISMORTUI                          | RIBOSOME                       |
| 1QVI | CRYSTAL STRUCTURE OF SCALLOP MYOSIN S1 IN THE PRE-POWER STROKE STATE TO 2.6 ANGSTROM RESOLUTION: FLEXIBILITY AND FUNCTION IN THE HEAD             | CONTRACTILE PROTEIN            |
| 1QVO | STRUCTURES OF HLA-A*1101 IN COMPLEX WITH IMMUNODOMINANT NONAMER AND DECAMER HIV-1 EPITOPES CLEARLY REVEAL THE PRESENCE OF A MIDDLE ANCHOR RESIDUE | IMMUNE SYSTEM                  |
| 1QX7 | CRYSTAL STRUCTURE OF APOCAM BOUND TO THE GATING DOMAIN OF SMALL CONDUCTANCE CA2+-ACTIVATED POTASSIUM CHANNEL                                      | SIGNALING PROTEIN              |
| 1QXD | STRUCTURAL BASIS FOR THE POTENT ANTISICKLING EFFECT OF A NOVEL CLASS OF 5-MEMBERED HETEROCYCLIC ALDEHYDIC COMPOUNDS                               | OXYGEN STORAGE/TRANSPORT       |
| 1QXE | STRUCTURAL BASIS FOR THE POTENT ANTISICKLING EFFECT OF A NOVEL CLASS OF 5-MEMBERED HETEROCYCLIC ALDEHYDIC COMPOUNDS                               | OXYGEN STORAGE/TRANSPORT       |
| 1QYG | ANTI-COCAINE ANTIBODY M82G2 COMPLEXED WITH BENZOYLECGONINE                                                                                        | IMMUNE SYSTEM                  |
| 1QZ0 | CRYSTAL STRUCTURE OF THE YERSINIA PESTIS PHOSPHATASE YOPH IN COMPLEX WITH A PHOSPHOTYROSYL MIMETIC-CONTAINING HEXAPEPTIDE                         | HYDROLASE                      |
| 1QZ2 | CRYSTAL STRUCTURE OF FKBP52 C-TERMINAL DOMAIN COMPLEX WITH THE C-TERMINAL PEPTIDE MEEVD OF HSP90                                                  | ISOMERASE/CHAPERONE            |
| 1QZ7 | BETA-CATENIN BINDING DOMAIN OF AXIN IN COMPLEX WITH BETA-                                                                                         | CELL ADHESION                  |

## CATENIN

|      |                                                                                                                                                          |                                |
|------|----------------------------------------------------------------------------------------------------------------------------------------------------------|--------------------------------|
| 1R0A | CRYSTAL STRUCTURE OF HIV-1 REVERSE TRANSCRIPTASE COVALENTLY TETHERED TO DNA TEMPLATE-PRIMER SOLVED TO 2.8 ANGSTROMS                                      | TRANSFERASE/IMMUNE SYSTEM/DNA  |
| 1R0B | ASPARTATE TRANS-CARBAMYLASE (ATCASE) OF ESCHERICHIA COLI: A NEW CRYSTALLINE R STATE BOUND TO PALA, OR TO PRODUCT ANALOGUES PHOSPHATE AND CITRATE         | TRANSFERASE                    |
| 1R0C | PRODUCTS IN THE T STATE OF ASPARTATE TRANS-CARBAMYLASE: CRYSTAL STRUCTURE OF THE PHOSPHATE AND N-CARBAMYL-L-ASPARTATE LIGATED ENZYME                     | TRANSFERASE                    |
| 1R0N | CRYSTAL STRUCTURE OF HETERODIMERIC ECDYSONE RECEPTOR DNA BINDING COMPLEX                                                                                 | TRANSCRIPTION/DNA              |
| 1R0O | CRYSTAL STRUCTURE OF THE HETERODIMERIC ECDYSONE RECEPTOR DNA-BINDING COMPLEX                                                                             | TRANSCRIPTION/DNA              |
| 1R0R | 1.1 ANGSTROM RESOLUTION STRUCTURE OF THE COMPLEX BETWEEN THE PROTEIN INHIBITOR, OMTKY3, AND THE SERINE PROTEASE, SUBTILISIN CARLSBERG                    | HYDROLASE                      |
| 1R1K | CRYSTAL STRUCTURE OF THE LIGAND-BINDING DOMAINS OF THE HETERODIMER ECR/USP BOUND TO PONASTERONE A                                                        | HORMONE/GROWTH FACTOR RECEPTOR |
| 1R1L | STRUCTURE OF DIMERIC ANTITHROMBIN COMPLEXED WITH A P14-P9 REACTIVE LOOP PEPTIDE AND AN EXOGENOUS TRIPEPTIDE (FORMYL-NORLEUCINE-LF)                       | HYDROLASE INHIBITOR            |
| 1R1P | STRUCTURAL BASIS FOR DIFFERENTIAL RECOGNITION OF TYROSINE PHOSPHORYLATED SITES IN THE LINKER FOR ACTIVATION OF T CELLS (LAT) BY THE ADAPTOR PROTEIN GADS | PEPTIDE BINDING PROTEIN        |
| 1R1Q | STRUCTURAL BASIS FOR DIFFERENTIAL RECOGNITION OF TYROSINE PHOSPHORYLATED SITES IN THE LINKER FOR ACTIVATION OF T CELLS (LAT) BY THE ADAPTOR PROTEIN GADS | PEPTIDE BINDING PROTEIN        |
| 1R1R | RIBONUCLEOTIDE REDUCTASE R1 PROTEIN MUTANT Y730F WITH A REDUCED ACTIVE SITE FROM ESCHERICHIA COLI                                                        | OXIDOREDUCTASE                 |
| 1R1X | CRYSTAL STRUCTURE OF OXY-HUMAN HEMOGLOBIN BASSETT AT 2.15 ANGSTROM                                                                                       | OXYGEN TRANSPORT               |
| 1R1Y | CRYSTAL STRUCTURE OF DEOXY-HUMAN HEMOGLOBIN BASSETT AT 1.8 ANGSTROM                                                                                      | OXYGEN TRANSPORT               |
| 1R20 | CRYSTAL STRUCTURE OF THE LIGAND-BINDING DOMAINS OF THE HETERODIMER ECR/USP BOUND TO THE SYNTHETIC AGONIST BY106830                                       | HORMONE/GROWTH FACTOR RECEPTOR |
| 1R24 | FAB FROM MURINE IGG3 KAPPA                                                                                                                               | IMMUNE SYSTEM                  |
| 1R27 | CRYSTAL STRUCTURE OF NARGH COMPLEX                                                                                                                       | OXIDOREDUCTASE                 |
| 1R2B | CRYSTAL STRUCTURE OF THE BCL6 BTB DOMAIN COMPLEXED WITH A SMRT CO-REPRESSOR PEPTIDE                                                                      | TRANSCRIPTION                  |
| 1R2C | PHOTOSYNTHETIC REACTION CENTER BLASTOCHLORIS VIRIDIS (ATCC)                                                                                              | PHOTOSYNTHESIS                 |
| 1R3I | POTASSIUM CHANNEL KCSA-FAB COMPLEX IN RB+                                                                                                                | MEMBRANE PROTEIN               |
| 1R3J | POTASSIUM CHANNEL KCSA-FAB COMPLEX IN HIGH CONCENTRATION OF TL+                                                                                          | MEMBRANE PROTEIN               |
| 1R3K | POTASSIUM CHANNEL KCSA-FAB COMPLEX IN LOW CONCENTRATION OF                                                                                               | MEMBRANE PROTEIN               |

| TL+  |                                                                                                                                                                               |                                   |
|------|-------------------------------------------------------------------------------------------------------------------------------------------------------------------------------|-----------------------------------|
| 1R3L | POTASSIUM CHANNEL KCSA-FAB COMPLEX IN CS+                                                                                                                                     | MEMBRANE PROTEIN                  |
| 1R4A | CRYSTAL STRUCTURE OF GTP-BOUND ADP-RIBOSYLATION FACTOR LIKE PROTEIN 1 (ARL1) AND GRIP DOMAIN OF GOLGIN245 COMPLEX                                                             | PROTEIN TRANSPORT                 |
| 1R4M | APBP1-UBA3-NEDD8, AN E1-UBIQUITIN-LIKE PROTEIN COMPLEX                                                                                                                        | CELL CYCLE                        |
| 1R4N | APBP1-UBA3-NEDD8, AN E1-UBIQUITIN-LIKE PROTEIN COMPLEX WITH ATP                                                                                                               | CELL CYCLE                        |
| 1R4P | SHIGA TOXIN TYPE 2                                                                                                                                                            | TOXIN                             |
| 1R4Q | SHIGA TOXIN                                                                                                                                                                   | TOXIN                             |
| 1R5I | CRYSTAL STRUCTURE OF THE MAM-MHC COMPLEX                                                                                                                                      | IMMUNE SYSTEM                     |
| 1R5U | RNA POLYMERASE II TFIIB COMPLEX                                                                                                                                               | TRANSCRIPTION                     |
| 1R5V | EVIDENCE THAT STRUCTURAL REARRANGEMENTS AND/OR FLEXIBILITY DURING TCR BINDING CAN CONTRIBUTE TO T-CELL ACTIVATION                                                             | SIGNALING PROTEIN                 |
| 1R5W | EVIDENCE THAT STRUCTURAL REARRANGEMENTS AND/OR FLEXIBILITY DURING TCR BINDING CAN CONTRIBUTE TO T-CELL ACTIVATION                                                             | SIGNALING PROTEIN                 |
| 1R64 | THE 2.2 Å CRYSTAL STRUCTURE OF KEX2 PROTEASE IN COMPLEX WITH AC-ARG-GLU-LYS-BOROARG PEPTIDYL BORONIC ACID INHIBITOR                                                           | HYDROLASE                         |
| 1R6O | ATP-DEPENDENT CLP PROTEASE ATP-BINDING SUBUNIT CLPA/ATP-DEPENDENT CLP PROTEASE ADAPTOR PROTEIN CLPS                                                                           | HYDROLASE                         |
| 1R6Q | CLPNS WITH FRAGMENTS                                                                                                                                                          | CHAPERONE/PROTEIN BINDING         |
| 1R8Q | FULL-LENGTH ARF1-GDP-MG IN COMPLEX WITH BREFELDIN A AND A SEC7 DOMAIN                                                                                                         | PROTEIN TRANSPORT/EXCHANGE FACTOR |
| 1R8S | ARF1[DELTA1-17]-GDP IN COMPLEX WITH A SEC7 DOMAIN CARRYING THE MUTATION OF THE CATALYTIC GLUTAMATE TO LYSINE                                                                  | PROTEIN TRANSPORT/EXCHANGE FACTOR |
| 1R9N | CRYSTAL STRUCTURE OF HUMAN DIPEPTIDYL PEPTIDASE IV IN COMPLEX WITH A DECAPEPTIDE (TNPY) AT 2.3 ÅNG. RESOLUTION                                                                | HYDROLASE                         |
| 1R9S | RNA POLYMERASE II STRAND SEPARATED ELONGATION COMPLEX, MATCHED NUCLEOTIDE                                                                                                     | TRANSCRIPTION/DNA/RNA             |
| 1R9T | RNA POLYMERASE II STRAND SEPARATED ELONGATION COMPLEX, MISMATCHED NUCLEOTIDE                                                                                                  | TRANSCRIPTION/DNA/RNA             |
| 1RAA | CRYSTAL STRUCTURE OF CTP-LIGATED T STATE ASPARTATE TRANSCARBAMOYLASE AT 2.5 ÅNGSTROMS RESOLUTION: IMPLICATIONS FOR ATCASE MUTANTS AND THE MECHANISM OF NEGATIVE COOPERATIVITY | TRANSFERASE                       |
| 1RAB | CRYSTAL STRUCTURE OF CTP-LIGATED T STATE ASPARTATE TRANSCARBAMOYLASE AT 2.5 ÅNGSTROMS RESOLUTION: IMPLICATIONS FOR ATCASE MUTANTS AND THE MECHANISM OF NEGATIVE COOPERATIVITY | TRANSFERASE                       |
| 1RAC | CRYSTAL STRUCTURE OF CTP-LIGATED T STATE ASPARTATE TRANSCARBAMOYLASE AT 2.5 ÅNGSTROMS RESOLUTION: IMPLICATIONS FOR ATCASE MUTANTS AND THE MECHANISM OF NEGATIVE COOPERATIVITY | TRANSFERASE                       |
| 1RAD | CRYSTAL STRUCTURE OF CTP-LIGATED T STATE ASPARTATE                                                                                                                            | TRANSFERASE                       |

| TRANSCARBAMOYLASE AT 2.5 ANGSTROMS RESOLUTION:<br>IMPLICATIONS FOR ATCASE MUTANTS AND THE MECHANISM OF<br>NEGATIVE COOPERATIVITY |                                                                                                                                                                                        |                                   |
|----------------------------------------------------------------------------------------------------------------------------------|----------------------------------------------------------------------------------------------------------------------------------------------------------------------------------------|-----------------------------------|
| 1RAE                                                                                                                             | CRYSTAL STRUCTURE OF CTP-LIGATED T STATE ASPARTATE<br>TRANSCARBAMOYLASE AT 2.5 ANGSTROMS RESOLUTION:<br>IMPLICATIONS FOR ATCASE MUTANTS AND THE MECHANISM OF<br>NEGATIVE COOPERATIVITY | TRANSFERASE                       |
| 1RAF                                                                                                                             | CRYSTAL STRUCTURE OF CTP-LIGATED T STATE ASPARTATE<br>TRANSCARBAMOYLASE AT 2.5 ANGSTROMS RESOLUTION:<br>IMPLICATIONS FOR ATCASE MUTANTS AND THE MECHANISM OF<br>NEGATIVE COOPERATIVITY | TRANSFERASE                       |
| 1RAG                                                                                                                             | CRYSTAL STRUCTURE OF CTP-LIGATED T STATE ASPARTATE<br>TRANSCARBAMOYLASE AT 2.5 ANGSTROMS RESOLUTION:<br>IMPLICATIONS FOR ATCASE MUTANTS AND THE MECHANISM OF<br>NEGATIVE COOPERATIVITY | TRANSFERASE                       |
| 1RAH                                                                                                                             | CRYSTAL STRUCTURE OF CTP-LIGATED T STATE ASPARTATE<br>TRANSCARBAMOYLASE AT 2.5 ANGSTROMS RESOLUTION:<br>IMPLICATIONS FOR ATCASE MUTANTS AND THE MECHANISM OF<br>NEGATIVE COOPERATIVITY | TRANSFERASE                       |
| 1RAI                                                                                                                             | CRYSTAL STRUCTURE OF CTP-LIGATED T STATE ASPARTATE<br>TRANSCARBAMOYLASE AT 2.5 ANGSTROMS RESOLUTION:<br>IMPLICATIONS FOR ATCASE MUTANTS AND THE MECHANISM OF<br>NEGATIVE COOPERATIVITY | TRANSFERASE                       |
| 1RB8                                                                                                                             | THE PHIX174 DNA BINDING PROTEIN J IN TWO DIFFERENT CAPSID<br>ENVIRONMENTS.                                                                                                             | VIRUS/DNA                         |
| 1RBC                                                                                                                             | CRYSTALLOGRAPHIC STRUCTURES OF RIBONUCLEASE S VARIANTS WITH<br>NONPOLAR SUBSTITUTION AT POSITION 13: PACKING AND CAVITIES                                                              | HYDROLASE(PHOSPHORIC DIESTER,RNA) |
| 1RBD                                                                                                                             | CRYSTALLOGRAPHIC STRUCTURES OF RIBONUCLEASE S VARIANTS WITH<br>NONPOLAR SUBSTITUTION AT POSITION 13: PACKING AND CAVITIES                                                              | HYDROLASE(PHOSPHORIC DIESTER,RNA) |
| 1RBE                                                                                                                             | CRYSTALLOGRAPHIC STRUCTURES OF RIBONUCLEASE S VARIANTS WITH<br>NONPOLAR SUBSTITUTION AT POSITION 13: PACKING AND CAVITIES                                                              | HYDROLASE(PHOSPHORIC DIESTER,RNA) |
| 1RBF                                                                                                                             | CRYSTALLOGRAPHIC STRUCTURES OF RIBONUCLEASE S VARIANTS WITH<br>NONPOLAR SUBSTITUTION AT POSITION 13: PACKING AND CAVITIES                                                              | HYDROLASE(PHOSPHORIC DIESTER,RNA) |
| 1RBG                                                                                                                             | CRYSTALLOGRAPHIC STRUCTURES OF RIBONUCLEASE S VARIANTS WITH<br>NONPOLAR SUBSTITUTION AT POSITION 13: PACKING AND CAVITIES                                                              | HYDROLASE(PHOSPHORIC DIESTER,RNA) |
| 1RBH                                                                                                                             | CRYSTALLOGRAPHIC STRUCTURES OF RIBONUCLEASE S VARIANTS WITH<br>NONPOLAR SUBSTITUTION AT POSITION 13: PACKING AND CAVITIES                                                              | HYDROLASE(PHOSPHORIC DIESTER,RNA) |
| 1RBI                                                                                                                             | CRYSTALLOGRAPHIC STRUCTURES OF RIBONUCLEASE S VARIANTS WITH<br>NONPOLAR SUBSTITUTION AT POSITION 13: PACKING AND CAVITIES                                                              | HYDROLASE(PHOSPHORIC DIESTER,RNA) |
| 1RBL                                                                                                                             | STRUCTURE DETERMINATION AND REFINEMENT OF RIBULOSE 1,5<br>BISPHOSPHATE CARBOXYLASE(SLASH)OXYGENASE FROM<br>SYNECHOCOCCUS PCC6301                                                       | LYASE(CARBON-CARBON)              |
| 1RBO                                                                                                                             | SPINACH RUBISCO IN COMPLEX WITH THE INHIBITOR 2-<br>CARBOXYARABINITOL-1,5-DIPHOSPHATE                                                                                                  | LYASE                             |
| 1RCO                                                                                                                             | SPINACH RUBISCO IN COMPLEX WITH THE INHIBITOR D-XYLULOSE-2,<br>2-DIOL-1,5-BISPHOSPHATE                                                                                                 | LYASE                             |
| 1RCX                                                                                                                             | NON-ACTIVATED SPINACH RUBISCO IN COMPLEX WITH ITS SUBSTRATE<br>RIBULOSE-1,5-BISPHOSPHATE                                                                                               | LYASE (CARBON-CARBON)             |

|      |                                                                                                                                   |                                         |
|------|-----------------------------------------------------------------------------------------------------------------------------------|-----------------------------------------|
| 1RD3 | 2.5A STRUCTURE OF ANTICOAGULANT THROMBIN VARIANT E217K                                                                            | HYDROLASE                               |
| 1RD8 | CRYSTAL STRUCTURE OF THE 1918 HUMAN H1 HEMAGGLUTININ PRECURSOR (HA0)                                                              | VIRAL PROTEIN                           |
| 1RDQ | HYDROLYSIS OF ATP IN THE CRYSTAL OF Y204A MUTANT OF CAMP-DEPENDENT PROTEIN KINASE                                                 | TRANSFERASE/TRANSFERASE INHIBITOR       |
| 1RDT | CRYSTAL STRUCTURE OF A NEW REXINOID BOUND TO THE RXRALPHA LIGAND BINDING DOAMIN IN THE RXRALPHA/PPARGAMMA HETERODIMER             | HORMONE/GROWTH FACTOR                   |
| 1RE0 | STRUCTURE OF ARF1-GDP BOUND TO SEC7 DOMAIN COMPLEXED WITH BREFELDIN A                                                             | PROTEIN TRANSPORT                       |
| 1RE1 | CRYSTAL STRUCTURE OF CASPASE-3 WITH A NICOTINIC ACID ALDEHYDE INHIBITOR                                                           | HYDROLASE                               |
| 1RE3 | CRYSTAL STRUCTURE OF FRAGMENT D OF BBETAD398A FIBRINOGEN WITH THE PEPTIDE LIGAND GLY-HIS-ARG-PRO-AMIDE                            | BLOOD CLOTTING                          |
| 1REQ | METHYLMALONYL-COA MUTASE                                                                                                          | ISOMERASE                               |
| 1REV | HIV-1 REVERSE TRANSCRIPTASE                                                                                                       | NUCLEOTIDYLTRANSFERASE                  |
| 1REW | STRUCTURAL REFINEMENT OF THE COMPLEX OF BONE MORPHOGENETIC PROTEIN 2 AND ITS TYPE IA RECEPTOR                                     | HORMONE/GROWTH FACTOR/SIGNALING PROTEIN |
| 1RF0 | CRYSTAL STRUCTURE OF FRAGMENT D OF GAMMAE132A FIBRINOGEN                                                                          | BLOOD CLOTTING                          |
| 1RF1 | CRYSTAL STRUCTURE OF FRAGMENT D OF GAMMAE132A FIBRINOGEN WITH THE PEPTIDE LIGAND GLY-HIS-ARG-PRO-AMIDE                            | BLOOD CLOTTING                          |
| 1RFD | ANTI-COCAINE ANTIBODY M82G2                                                                                                       | IMMUNE SYSTEM                           |
| 1RFF | CRYSTAL STRUCTURE OF HUMAN TYROSYL-DNA PHOSPHODIESTERASE COMPLEXED WITH VANADATE, OCTAPEPTIDE KLNYYDPR, AND TETRANUCLEOTIDE AGTT. | HYDROLASE/DNA                           |
| 1RFI | CRYSTAL STRUCTURE OF HUMAN TYROSYL-DNA PHOSPHODIESTERASE COMPLEXED WITH VANADATE, PENTAPEPTIDE KLNYK, AND TETRANUCLEOTIDE AGTC    | HYDROLASE/DNA                           |
| 1RFN | HUMAN COAGULATION FACTOR IXA IN COMPLEX WITH P-AMINO BENZAMIDINE                                                                  | COAGULATION FACTOR                      |
| 1RG5 | STRUCTURE OF THE PHOTOSYNTHETIC REACTION CENTRE FROM RHODOBACTER SPHAEROIDES CAROTENOIDLESS STRAIN R-26.1                         | PHOTOSYNTHESIS                          |
| 1RGI | CRYSTAL STRUCTURE OF GELSOLIN DOMAINS G1-G3 BOUND TO ACTIN                                                                        | CONTRACTILE PROTEIN                     |
| 1RGN | STRUCTURE OF THE REACTION CENTRE FROM RHODOBACTER SPHAEROIDES CAROTENOIDLESS STRAIN R-26.1 RECONSTITUTED WITH SPHEROIDENE         | PHOTOSYNTHESIS                          |
| 1RGQ | M9A HCV PROTEASE COMPLEX WITH PENTAPEPTIDE KETO-AMIDE INHIBITOR                                                                   | VIRAL PROTEIN, HYDROLASE                |
| 1RH5 | THE STRUCTURE OF A PROTEIN CONDUCTING CHANNEL                                                                                     | PROTEIN TRANSPORT                       |
| 1RHH | CRYSTAL STRUCTURE OF THE BROADLY HIV-1 NEUTRALIZING FAB X5 AT 1.90 ANGSTROM RESOLUTION                                            | IMMUNE SYSTEM                           |
| 1RHJ | CRYSTAL STRUCTURE OF THE COMPLEX OF CASPASE-3 WITH A PRYAZINONE INHIBITOR                                                         | HYDROLASE                               |

|      |                                                                                                                                                     |                                |
|------|-----------------------------------------------------------------------------------------------------------------------------------------------------|--------------------------------|
| 1RHK | CRYSTAL STRUCTURE OF THE COMPLEX OF CASPASE-3 WITH A PHENYL-PROPYL-KETONE INHIBITOR                                                                 | HYDROLASE                      |
| 1RHM | CRYSTAL STRUCTURE OF THE COMPLEX OF CASPASE-3 WITH A NICOTINIC ACID ALDEHYDE INHIBITOR                                                              | HYDROLASE                      |
| 1RHQ | CRYSTAL STRUCTURE OF THE COMPLEX OF CASPASE-3 WITH A BROMOMETHOXYPHENYL INHIBITOR                                                                   | HYDROLASE                      |
| 1RHR | CRYSTAL STRUCTURE OF THE COMPLEX OF CASPASE-3 WITH A CINNAMIC ACID METHYL ESTER INHIBITOR                                                           | HYDROLASE                      |
| 1RHU | CRYSTAL STRUCTURE OF THE COMPLEX OF CASPASE-3 WITH A 5,6,7 TRICYCLIC PEPTIDOMIMETIC INHIBITOR                                                       | HYDROLASE                      |
| 1RHZ | THE STRUCTURE OF A PROTEIN CONDUCTING CHANNEL                                                                                                       | PROTEIN TRANSPORT              |
| 1RI8 | CRYSTAL STRUCTURE OF THE CAMELID SINGLE DOMAIN ANTIBODY 1D2L19 IN COMPLEX WITH HEN EGG WHITE LYSOZYME                                               | IMMUNE SYSTEM/HYDROLASE        |
| 1RIH | CRYSTAL STRUCTURE OF FAB 14F7, A UNIQUE ANTI-TUMOR ANTIBODY SPECIFIC FOR N-GLYCOLYL GM3                                                             | IMMUNE SYSTEM                  |
| 1RIO | STRUCTURE OF BACTERIOPHAGE LAMBDA CI-NTD IN COMPLEX WITH SIGMA-REGION4 OF THERMUS AQUATICUS BOUND TO DNA                                            | TRANSCRIPTION/DNA              |
| 1RIU | ANTI-COCAINE ANTIBODY M82G2 COMPLEXED WITH NORBENZOYLECGONINE                                                                                       | IMMUNE SYSTEM                  |
| 1RIV | ANTI-COCAINE ANTIBODY M82G2 COMPLEXED WITH META-OXYBENZOYLECGONINE                                                                                  | IMMUNE SYSTEM                  |
| 1RIW | THROMBIN IN COMPLEX WITH NATURAL PRODUCT INHIBITOR OSCILLARIN                                                                                       | HYDROLASE/BLOOD CLOTING        |
| 1RJ9 | STRUCTURE OF THE HETERODIMER OF THE CONSERVED GTPASE DOMAINS OF THE SIGNAL RECOGNITION PARTICLE (FFH) AND ITS RECEPTOR (FTSY)                       | PROTEIN TRANSPORT              |
| 1RJC | CRYSTAL STRUCTURE OF THE CAMELID SINGLE DOMAIN ANTIBODY CAB-LYS2 IN COMPLEX WITH HEN EGG WHITE LYSOZYME                                             | IMMUNE SYSTEM/HYDROLASE        |
| 1RJK | CRYSTAL STRUCTURE OF THE RAT VITAMIN D RECEPTOR LIGAND BINDING DOMAIN COMPLEXED WITH 2MD AND A SYNTHETIC PEPTIDE CONTAINING THE NR2 BOX OF DRIP 205 | HORMONE/GROWTH FACTOR RECEPTOR |
| 1RJL | STRUCTURE OF THE COMPLEX BETWEEN OSPB-CT AND BACTERICIDAL FAB-H6831                                                                                 | IMMUNE SYSTEM                  |
| 1RJY | MHC CLASS I NATURAL MUTANT H-2KBM8 HEAVY CHAIN COMPLEXED WITH BETA-2 MICROGLOBULIN AND HERPES SIMPLEX VIRUS GLYCOPROTEIN B PEPTIDE                  | IMMUNE SYSTEM                  |
| 1RJZ | MHC CLASS I NATURAL MUTANT H-2KBM8 HEAVY CHAIN COMPLEXED WITH BETA-2 MICROGLOBULIN AND HERPIES SIMPLEX VIRUS MUTANT GLYCOPROTEIN B PEPTIDE          | IMMUNE SYSTEM                  |
| 1RK0 | MHC CLASS I H-2KB HEAVY CHAIN COMPLEXED WITH BETA-2 MICROGLOBULIN AND HERPES SIMPLEX VIRUS GLYCOPROTEIN B PEPTIDE                                   | IMMUNE SYSTEM                  |
| 1RK1 | MHC CLASS I NATURAL H-2KB HEAVY CHAIN COMPLEXED WITH BETA-2 MICROGLOBULIN AND HERPES SIMPLEX VIRUS MUTANT GLYCOPROTEIN B PEPTIDE                    | IMMUNE SYSTEM                  |



|      |                                                                                                                                                                               |                                   |
|------|-------------------------------------------------------------------------------------------------------------------------------------------------------------------------------|-----------------------------------|
| 1RK3 | CRYSTAL STRUCTURE OF THE RAT VITAMIN D RECEPTOR LIGAND BINDING DOMAIN COMPLEXED WITH 1,25-DIHYDROXYVITAMIN D3 AND A SYNTHETIC PEPTIDE CONTAINING THE NR2 BOX OF DRIP 205      | HORMONE/GROWTH FACTOR RECEPTOR    |
| 1RK8 | STRUCTURE OF THE CYTOSOLIC PROTEIN PYM BOUND TO THE MAGO-Y14 CORE OF THE EXON JUNCTION COMPLEX                                                                                | TRANSLATION                       |
| 1RKC | HUMAN VINCULIN HEAD (1-258) IN COMPLEX WITH TALIN'S VINCULIN BINDING SITE 3 (RESIDUES 1944-1969)                                                                              | CELL ADHESION, STRUCTURAL PROTEIN |
| 1RKE | HUMAN VINCULIN HEAD (1-258) IN COMPLEX WITH HUMAN VINCULIN TAIL (879-1066)                                                                                                    | CELL ADHESION, STRUCTURAL PROTEIN |
| 1RKG | CRYSTAL STRUCTURE OF THE RAT VITAMIN D RECEPTOR LIGAND BINDING DOMAIN COMPLEXED WITH 2MBISP AND A SYNTHETIC PEPTIDE CONTAINING THE NR2 BOX OF DRIP 205                        | HORMONE/GROWTH FACTOR RECEPTOR    |
| 1RKH | CRYSTAL STRUCTURE OF THE RAT VITAMIN D RECEPTOR LIGAND BINDING DOMAIN COMPLEXED WITH 2AM20R AND A SYNTHETIC PEPTIDE CONTAINING THE NR2 BOX OF DRIP 205                        | HORMONE/GROWTH FACTOR RECEPTOR    |
| 1RLB | RETINOL BINDING PROTEIN COMPLEXED WITH TRANSTHYRETIN                                                                                                                          | COMPLEX (PROTEIN/PROTEIN)         |
| 1RLC | CRYSTAL STRUCTURE OF THE UNACTIVATED RIBULOSE 1, 5-BISPHOSPHATE CARBOXYLASE(SLASH)OXYGENASE COMPLEXED WITH A TRANSITION STATE ANALOG, 2-CARBOXY-D-ARABINITOL 1,5-BISPHOSPHATE | LYASE(CARBON-CARBON)              |
| 1RLD | SOLID-STATE PHASE TRANSITION IN THE CRYSTAL STRUCTURE OF RIBULOSE 1,5-BIPHOSPHATE CARBOXYLASE(SLASH)OXYGENASE                                                                 | LYASE(CARBON-CARBON)              |
| 1RM1 | STRUCTURE OF A YEAST TFIIA/TBP/TATA-BOX DNA COMPLEX                                                                                                                           | TRANSCRIPTION/DNA                 |
| 1RM6 | STRUCTURE OF 4-HYDROXYBENZOYL-COA REDUCTASE FROM THAUERA AROMATICA                                                                                                            | OXIDOREDUCTASE                    |
| 1RMF | STRUCTURES OF A MONOCLONAL ANTI-ICAM-1 ANTIBODY R6.5 FRAGMENT AT 2.8 ANGSTROMS RESOLUTION                                                                                     | IMMUNOGLOBULIN                    |
| 1RP3 | COCRYSTAL STRUCTURE OF THE FLAGELLAR SIGMA/ANTI-SIGMA COMPLEX, SIGMA-28/FLGM                                                                                                  | TRANSCRIPTION                     |
| 1RPS | CRYSTALLOGRAPHIC ANALYSIS OF THE INTERACTION OF NITRIC OXIDE WITH QUATERNARY-T HUMAN HEMOGLOBIN. HEMOGLOBIN EXPOSED TO NO UNDER ANEROBIC CONDITIONS                           | OXYGEN STORAGE/TRANSPORT          |
| 1RQ3 | CRYSTALLOGRAPHIC ANALYSIS OF THE INTERACTION OF NITRIC OXIDE WITH QUATERNARY-T HUMAN DEOXYHEMOGLOBIN, DEOXYHEMOGLOBIN                                                         | OXYGEN STORAGE/TRANSPORT          |
| 1RQ4 | CRYSTALLOGRAPHIC ANALYSIS OF THE INTERACTION OF NITRIC OXIDE WITH QUATERNARY-T HUMAN HEMOGLOBIN, HEMOGLOBIN EXPOSED TO NO UNDER AEROBIC CONDITIONS                            | OXYGEN STORAGE/TRANSPORT          |
| 1RQA | CRYSTALLOGRAPHIC ANALYSIS OF THE INTERACTION OF NITRIC OXIDE WITH QUATERNARY-T HUMAN HEMOGLOBIN. BETA W73E HEMOGLOBIN EXPOSED TO NO UNDER ANAEROBIC CONDITIONS                | OXYGEN STORAGE/TRANSPORT          |
| 1RQF | STRUCTURE OF CK2 BETA SUBUNIT CRYSTALLIZED IN THE PRESENCE OF A P21WAF1 PEPTIDE                                                                                               | TRANSFERASE                       |
| 1RQK | STRUCTURE OF THE REACTION CENTRE FROM RHODOBACTER SPHAEROIDES CAROTENOIDLESS STRAIN R-26.1 RECONSTITUTED WITH 3,4-DIHYDROSPHEROIDENE                                          | PHOTOSYNTHESIS                    |

|      |                                                                                                                                                                      |                                        |
|------|----------------------------------------------------------------------------------------------------------------------------------------------------------------------|----------------------------------------|
| 1RQQ | CRYSTAL STRUCTURE OF THE INSULIN RECEPTOR KINASE IN COMPLEX WITH THE SH2 DOMAIN OF APS                                                                               | TRANSFERASE/SIGNALING PROTEIN          |
| 1RRP | STRUCTURE OF THE RAN-GPPNHP-RANBD1 COMPLEX                                                                                                                           | COMPLEX (SMALL GTPASE/NUCLEAR PROTEIN) |
| 1RSC | STRUCTURE OF AN EFFECTOR INDUCED INACTIVATED STATE OF RIBULOSE BISPHOSPHATE CARBOXYLASE(SLASH)OXYGENASE: THE BINARY COMPLEX BETWEEN ENZYME AND XYLULOSE BISPHOSPHATE | LYASE (CARBON-CARBON)                  |
| 1RT1 | CRYSTAL STRUCTURE OF HIV-1 REVERSE TRANSCRIPTASE COMPLEXED WITH MKC-442                                                                                              | NUCLEOTIDYLTRANSFERASE                 |
| 1RT2 | CRYSTAL STRUCTURE OF HIV-1 REVERSE TRANSCRIPTASE COMPLEXED WITH TNK-651                                                                                              | NUCLEOTIDYLTRANSFERASE                 |
| 1RT3 | AZT DRUG RESISTANT HIV-1 REVERSE TRANSCRIPTASE COMPLEXED WITH 1051U91                                                                                                | NUCLEOTIDYLTRANSFERASE                 |
| 1RT4 | HIV-1 REVERSE TRANSCRIPTASE COMPLEXED WITH UC781                                                                                                                     | NUCLEOTIDYLTRANSFERASE                 |
| 1RT5 | HIV-1 REVERSE TRANSCRIPTASE COMPLEXED WITH UC10                                                                                                                      | NUCLEOTIDYLTRANSFERASE                 |
| 1RT6 | HIV-1 REVERSE TRANSCRIPTASE COMPLEXED WITH UC38                                                                                                                      | NUCLEOTIDYLTRANSFERASE                 |
| 1RT7 | HIV-1 REVERSE TRANSCRIPTASE COMPLEXED WITH UC84                                                                                                                      | NUCLEOTIDYLTRANSFERASE                 |
| 1RTD | STRUCTURE OF A CATALYTIC COMPLEX OF HIV-1 REVERSE TRANSCRIPTASE: IMPLICATIONS FOR NUCLEOSIDE ANALOG DRUG RESISTANCE                                                  | TRANSFERASE/DNA                        |
| 1RTH | HIGH RESOLUTION STRUCTURES OF HIV-1 RT FROM FOUR RT-INHIBITOR COMPLEXES                                                                                              | NUCLEOTIDYLTRANSFERASE                 |
| 1RTI | HIGH RESOLUTION STRUCTURES OF HIV-1 RT FROM FOUR RT-INHIBITOR COMPLEXES                                                                                              | NUCLEOTIDYLTRANSFERASE                 |
| 1RTJ | MECHANISM OF INHIBITION OF HIV-1 REVERSE TRANSCRIPTASE BY NON-NUCLEOSIDE INHIBITORS                                                                                  | NUCLEOTIDYLTRANSFERASE                 |
| 1RTL | CRYSTAL STRUCTURE OF HCV NS3 PROTEASE DOMAIN: NS4A PEPTIDE COMPLEX WITH COVALENTLY BOUND PYRROLIDINE-5,5-TRANSLACTAM INHIBITOR                                       | VIRAL PROTEIN COMPLEX                  |
| 1RU7 | 1934 HUMAN H1 HEMAGGLUTININ                                                                                                                                          | VIRAL PROTEIN                          |
| 1RU9 | CRYSTAL STRUCTURE (A) OF U.V.-IRRADIATED CATIONIC CYCLIZATION ANTIBODY 4C6 FAB AT PH 4.6 WITH A DATA SET COLLECTED IN-HOUSE.                                         | IMMUNE SYSTEM                          |
| 1RUA | CRYSTAL STRUCTURE (B) OF U.V.-IRRADIATED CATIONIC CYCLIZATION ANTIBODY 4C6 FAB AT PH 4.6 WITH A DATA SET COLLECTED AT SSRL BEAMLINE 11-1.                            | IMMUNE SYSTEM                          |
| 1RUK | CRYSTAL STRUCTURE (C) OF NATIVE CATIONIC CYCLIZATION ANTIBODY 4C6 FAB AT PH 4.6 WITH A DATA SET COLLECTED AT SSRL BEAMLINE 9-1                                       | IMMUNE SYSTEM                          |
| 1RUL | CRYSTAL STRUCTURE (D) OF U.V.-IRRADIATED CATIONIC CYCLIZATION ANTIBODY 4C6 FAB AT PH 5.6 WITH A DATA SET COLLECTED AT SSRL BEAMLINE 11-1.                            | IMMUNE SYSTEM                          |
| 1RUM | CRYSTAL STRUCTURE (F) OF H2O2-SOAKED CATIONIC CYCLIZATION ANTIBODY 4C6 FAB AT PH 8.5 WITH A DATA SET COLLECTED AT SSRL BEAMLINE 9-1.                                 | IMMUNE SYSTEM                          |

|      |                                                                                                                                                                |                                |
|------|----------------------------------------------------------------------------------------------------------------------------------------------------------------|--------------------------------|
| 1RUP | CRYSTAL STRUCTURE (G) OF NATIVE CATIONIC CYCLIZATION ANTIBODY 4C6 FAB AT PH 8.5 WITH A DATA SET COLLECTED AT APS BEAMLINE 19-ID                                | IMMUNE SYSTEM                  |
| 1RUQ | CRYSTAL STRUCTURE (H) OF U.V.-IRRADIATED DIELS-ALDER ANTIBODY 13G5 FAB AT PH 8.0 WITH A DATA SET COLLECTED IN HOUSE.                                           | IMMUNE SYSTEM                  |
| 1RUR | CRYSTAL STRUCTURE (I) OF NATIVE DIELS-ALDER ANTIBODY 13G5 FAB AT PH 8.0 WITH A DATA SET COLLECTED AT SSRL BEAMLINE 9-1                                         | IMMUNE SYSTEM                  |
| 1RUZ | 1918 H1 HEMAGGLUTININ                                                                                                                                          | VIRAL PROTEIN                  |
| 1RV0 | 1930 SWINE H1 HEMAGGLUTININ COMPLEXED WITH LSTA                                                                                                                | VIRAL PROTEIN                  |
| 1RV6 | CRYSTAL STRUCTURE OF PLGF IN COMPLEX WITH DOMAIN 2 OF VEGFR1                                                                                                   | HORMONE/GROWTH FACTOR/RECEPTOR |
| 1RVJ | PHOTOSYNTHETIC REACTION CENTER DOUBLE MUTANT FROM RHODOBACTER SPHAEROIDES WITH ASP L213 REPLACED WITH ASN AND ARG H177 REPLACED WITH HIS                       | PHOTOSYNTHESIS                 |
| 1RVT | 1930 H1 HEMAGGLUTININ IN COMPLEX WITH LSTC                                                                                                                     | VIRAL PROTEIN                  |
| 1RVW | R STATE HUMAN HEMOGLOBIN [ALPHA V96W], CARBONMONOXY                                                                                                            | OXYGEN TRANSPORT               |
| 1RVX | 1934 H1 HEMAGGLUTININ IN COMPLEX WITH LSTA                                                                                                                     | VIRAL PROTEIN                  |
| 1RVZ | 1934 H1 HEMAGGLUTININ IN COMPLEX WITH LSTC                                                                                                                     | VIRAL PROTEIN                  |
| 1RWE | ENHANCING THE ACTIVITY OF INSULIN AT RECEPTOR EDGE: CRYSTAL STRUCTURE AND PHOTO-CROSS-LINKING OF A8 ANALOGUES                                                  | HORMONE/GROWTH FACTOR          |
| 1RWK | CRYSTAL STRUCTURE OF HUMAN CASPASE-1 IN COMPLEX WITH 3-(2-MERCAPTO-ACETYLAMINO)-4-OXO-PENTANOIC ACID                                                           | HYDROLASE                      |
| 1RWM | CRYSTAL STRUCTURE OF HUMAN CASPASE-1 IN COMPLEX WITH 4-OXO-3-[2-(5-{{4-(QUINOXALIN-2-YLAMINO)-BENZOYLAMINO}-METHYL)-THIOPHEN-2-YL}-ACETYLAMINO]-PENTANOIC ACID | HYDROLASE                      |
| 1RWN | CRYSTAL STRUCTURE OF HUMAN CASPASE-1 IN COMPLEX WITH 3-{2-ETHYL-6-[4-(QUINOXALIN-2-YLAMINO)-BENZOYLAMINO]-HEXANOYLAMINO}-4-OXO-BUTYRIC ACID                    | HYDROLASE                      |
| 1RWO | CRYSTAL STRUCTURE OF HUMAN CASPASE-1 IN COMPLEX WITH 4-OXO-3-{6-[4-(QUINOXALIN-2-YLAMINO)-BENZOYLAMINO]-2-THIOPHEN-2-YL-HEXANOYLAMINO}-PENTANOIC ACID          | HYDROLASE                      |
| 1RWP | CRYSTAL STRUCTURE OF HUMAN CASPASE-1 IN COMPLEX WITH 3-{6-[(8-HYDROXY-QUINOLINE-2-CARBONYL)-AMINO]-2-THIOPHEN-2-YL-HEXANOYLAMINO}-4-OXO-BUTYRIC ACID           | HYDROLASE                      |
| 1RWV | CRYSTAL STRUCTURE OF HUMAN CASPASE-1 IN COMPLEX WITH 5-[5-(1-CARBOXYMETHYL-2-OXO-PROPYLCARBAMOYL)-5-PHENYL-PENTYLSULFAMOYL]-2-HYDROXY-BENZOIC ACID             | HYDROLASE                      |
| 1RWW | CRYSTAL STRUCTURE OF HUMAN CASPASE-1 IN COMPLEX WITH 4-OXO-3-[(6-{{4-(QUINOXALIN-2-YLAMINO)-BENZOYLAMINO}-METHYL)-PYRIDINE-3-CARBONYL}-AMINO]-BUTYRIC ACID     | HYDROLASE                      |
| 1RWX | CRYSTAL STRUCTURE OF HUMAN CASPASE-1 IN COMPLEX WITH 4-OXO-3-{6-[4-(QUINOXALIN-2-YLOXY)-BENZOYLAMINO]-2-THIOPHEN-2-YL-HEXANOYLAMINO}-BUTYRIC ACID              | HYDROLASE                      |

**TABLE S5**

Jochim, et al

|      |                                                                                                                                                                                              |                             |
|------|----------------------------------------------------------------------------------------------------------------------------------------------------------------------------------------------|-----------------------------|
| 1RXO | ACTIVATED SPINACH RUBISCO IN COMPLEX WITH ITS SUBSTRATE RIBULOSE-1,5-BISPHOSPHATE AND CALCIUM                                                                                                | LYASE (CARBON-CARBON)       |
| 1RXZ | C-TERMINAL REGION OF A. FULGIDUS FEN-1 COMPLEXED WITH A. FULGIDUS PCNA                                                                                                                       | REPLICATION                 |
| 1RY1 | STRUCTURE OF THE SIGNAL RECOGNITION PARTICLE INTERACTING WITH THE ELONGATION-ARRESTED RIBOSOME                                                                                               | TRANSLATION                 |
| 1RY5 | PHOTOSYNTHETIC REACTION CENTER MUTANT FROM RHODOBACTER SPHAEROIDES WITH ASP L213 REPLACED WITH ASN                                                                                           | PHOTOSYNTHESIS              |
| 1RYP | CRYSTAL STRUCTURE OF THE 20S PROTEASOME FROM YEAST AT 2.4 ANGSTROMS RESOLUTION                                                                                                               | MULTICATALYTIC PROTEINASE   |
| 1RZ7 | CRYSTAL STRUCTURE OF HUMAN ANTI-HIV-1 GP120-REACTIVE ANTIBODY 48D                                                                                                                            | IMMUNE SYSTEM               |
| 1RZ8 | CRYSTAL STRUCTURE OF HUMAN ANTI-HIV-1 GP120-REACTIVE ANTIBODY 17B                                                                                                                            | IMMUNE SYSTEM               |
| 1RZF | CRYSTAL STRUCTURE OF HUMAN ANTI-HIV-1 GP120-REACTIVE ANTIBODY E51                                                                                                                            | IMMUNE SYSTEM               |
| 1RZG | CRYSTAL STRUCTURE OF HUMAN ANTI-HIV-1 GP120 REACTIVE ANTIBODY 412D                                                                                                                           | IMMUNE SYSTEM               |
| 1RZH | PHOTOSYNTHETIC REACTION CENTER DOUBLE MUTANT FROM RHODOBACTER SPHAEROIDES WITH ASP L213 REPLACED WITH ASN AND ARG M233 REPLACED WITH CYS IN THE CHARGE-NEUTRAL DQAQB STATE (TRIGONAL FORM)   | PHOTOSYNTHESIS              |
| 1RZI | CRYSTAL STRUCTURE OF HUMAN ANTI-HIV-1 GP120-REACTIVE ANTIBODY 47E FAB                                                                                                                        | IMMUNE SYSTEM               |
| 1RZJ | HIV-1 HXBC2 GP120 ENVELOPE GLYCOPROTEIN COMPLEXED WITH CD4 AND INDUCED NEUTRALIZING ANTIBODY 17B                                                                                             | VIRAL PROTEIN/IMMUNE SYSTEM |
| 1RZK | HIV-1 YU2 GP120 ENVELOPE GLYCOPROTEIN COMPLEXED WITH CD4 AND INDUCED NEUTRALIZING ANTIBODY 17B                                                                                               | VIRAL PROTEIN/IMMUNE SYSTEM |
| 1RZO | AGGLUTININ FROM RICINUS COMMUNIS WITH GALACTOAZA                                                                                                                                             | HYDROLASE                   |
| 1RZX | CRYSTAL STRUCTURE OF A PAR-6 PDZ-PEPTIDE COMPLEX                                                                                                                                             | CELL CYCLE                  |
| 1RZZ | PHOTOSYNTHETIC REACTION CENTER DOUBLE MUTANT FROM RHODOBACTER SPHAEROIDES WITH ASP L213 REPLACED WITH ASN AND ARG M233 REPLACED WITH CYS IN THE CHARGE-NEUTRAL DQAQB STATE (TETRAGONAL FORM) | PHOTOSYNTHESIS              |
| 1S00 | PHOTOSYNTHETIC REACTION CENTER DOUBLE MUTANT FROM RHODOBACTER SPHAEROIDES WITH ASP L213 REPLACED WITH ASN AND ARG M233 REPLACED WITH CYS IN THE CHARGE-SEPARATED D+QAQB- STATE               | PHOTOSYNTHESIS              |
| 1S0H | STRUCTURE DETERMINATION OF HAEMOGLOBIN FROM DONKEY(EQUUS ASINUS) AT 3.0 ANGSTROM RESOLUTION                                                                                                  | OXYGEN STORAGE/TRANSPORT    |
| 1S0W | 1B LACTAMSE/ B LACTAMASE INHIBITOR                                                                                                                                                           | HYDROLASE                   |
| 1S0Y | THE STRUCTURE OF TRANS-3-CHLOROACRYLIC ACID DEHALOGENASE, COVALENTLY INACTIVATED BY THE MECHANISM-BASED INHIBITOR 3-BROMOPROPIOLATE AT 2.3 ANGSTROM RESOLUTION                               | LYASE                       |
| 1S1C | CRYSTAL STRUCTURE OF THE COMPLEX BETWEEN THE HUMAN RHOA AND                                                                                                                                  | SIGNALING PROTEIN           |

## RHO-BINDING DOMAIN OF HUMAN ROCK1

|      |                                                                                                                                                                                                                                               |                                   |
|------|-----------------------------------------------------------------------------------------------------------------------------------------------------------------------------------------------------------------------------------------------|-----------------------------------|
| 1S1H | STRUCTURE OF THE RIBOSOMAL 80S-EEF2-SORDARIN COMPLEX FROM YEAST OBTAINED BY DOCKING ATOMIC MODELS FOR RNA AND PROTEIN COMPONENTS INTO A 11.7 Å CRYO-EM MAP. THIS FILE, 1S1H, CONTAINS 40S SUBUNIT. THE 60S RIBOSOMAL SUBUNIT IS IN FILE 1S1I. | RIBOSOME                          |
| 1S1I | STRUCTURE OF THE RIBOSOMAL 80S-EEF2-SORDARIN COMPLEX FROM YEAST OBTAINED BY DOCKING ATOMIC MODELS FOR RNA AND PROTEIN COMPONENTS INTO A 11.7 Å CRYO-EM MAP. THIS FILE, 1S1I, CONTAINS 60S SUBUNIT. THE 40S RIBOSOMAL SUBUNIT IS IN FILE 1S1H. | RIBOSOME                          |
| 1S1T | CRYSTAL STRUCTURE OF L100I MUTANT HIV-1 REVERSE TRANSCRIPTASE IN COMPLEX WITH UC-781                                                                                                                                                          | TRANSFERASE                       |
| 1S1U | CRYSTAL STRUCTURE OF L100I MUTANT HIV-1 REVERSE TRANSCRIPTASE IN COMPLEX WITH NEVIRAPINE                                                                                                                                                      | TRANSFERASE                       |
| 1S1V | CRYSTAL STRUCTURE OF L100I MUTANT HIV-1 REVERSE TRANSCRIPTASE IN COMPLEX WITH TNK-651                                                                                                                                                         | TRANSFERASE                       |
| 1S1W | CRYSTAL STRUCTURE OF V106A MUTANT HIV-1 REVERSE TRANSCRIPTASE IN COMPLEX WITH UC-781                                                                                                                                                          | TRANSFERASE                       |
| 1S1X | CRYSTAL STRUCTURE OF V108I MUTANT HIV-1 REVERSE TRANSCRIPTASE IN COMPLEX WITH NEVIRAPINE                                                                                                                                                      | TRANSFERASE                       |
| 1S26 | STRUCTURE OF ANTHRAX EDEMA FACTOR-CALMODULIN-ALPHA,BETA-METHYLENEADENOSINE 5'-TRIPHOSPHATE COMPLEX REVEALS AN ALTERNATIVE MODE OF ATP BINDING TO THE CATALYTIC SITE                                                                           | TOXIN,LYASE/METAL BINDING PROTEIN |
| 1S32 | MOLECULAR RECOGNITION OF THE NUCLEOSOMAL 'SUPERGROOVE'                                                                                                                                                                                        | STRUCTURAL PROTEIN/DNA            |
| 1S3K | CRYSTAL STRUCTURE OF A HUMANIZED FAB (HU3S193) IN COMPLEX WITH THE LEWIS Y TETRASACCHARIDE                                                                                                                                                    | IMMUNE SYSTEM                     |
| 1S3S | CRYSTAL STRUCTURE OF AAA ATPASE P97/VCP ND1 IN COMPLEX WITH P47 C                                                                                                                                                                             | PROTEIN BINDING                   |
| 1S3T | BORATE INHIBITED BACILLUS PASTEURII UREASE CRYSTAL STRUCTURE                                                                                                                                                                                  | HYDROLASE                         |
| 1S4V | THE 2.0 Å CRYSTAL STRUCTURE OF THE KDEL-TAILED CYSTEINE ENDOPEPTIDASE FUNCTIONING IN PROGRAMMED CELL DEATH OF RICINUS COMMUNIS ENDOSPERM                                                                                                      | HYDROLASE                         |
| 1S4Y | CRYSTAL STRUCTURE OF THE ACTIVIN/ACTRIIB EXTRACELLULAR DOMAIN                                                                                                                                                                                 | TRANSFERASE                       |
| 1S5C | CHOLERA HOLOTOXIN WITH AN A-SUBUNIT Y30S MUTATION, CRYSTAL FORM 1                                                                                                                                                                             | TRANSEASE,TOXIN                   |
| 1S5D | CHOLERA HOLOTOXIN WITH AN A-SUBUNIT Y30S MUTATION, CRYSTAL FORM 2                                                                                                                                                                             | TRANSEASE,TOXIN                   |
| 1S5E | CHOLERA HOLOTOXIN, CRYSTAL FORM 1                                                                                                                                                                                                             | TRANSEASE,TOXIN                   |
| 1S5F | CHOLERA HOLOTOXIN, CRYSTAL FORM 2                                                                                                                                                                                                             | TRANSEASE,TOXIN                   |
| 1S5G | STRUCTURE OF SCALLOP MYOSIN S1 REVEALS A NOVEL NUCLEOTIDE CONFORMATION                                                                                                                                                                        | CONTRACTILE PROTEIN               |
| 1S5H | POTASSIUM CHANNEL KCSA-FAB COMPLEX T75C MUTANT IN K <sup>+</sup>                                                                                                                                                                              | MEMBRANE PROTEIN                  |

|      |                                                                                                                                                                                 |                                   |
|------|---------------------------------------------------------------------------------------------------------------------------------------------------------------------------------|-----------------------------------|
| 1S5I | FAB (LNKB-2) OF MONOCLONAL ANTIBODY TO HUMAN INTERLEUKIN-2, CRYSTAL STRUCTURE                                                                                                   | IMMUNE SYSTEM                     |
| 1S5L | ARCHITECTURE OF THE PHOTOSYNTHETIC OXYGEN EVOLVING CENTER                                                                                                                       | PHOTOSYNTHESIS                    |
| 1S5P | STRUCTURE AND SUBSTRATE BINDING PROPERTIES OF COBB, A SIR2 HOMOLOG PROTEIN DEACETYLASE FROM ESCHERICIA COLI.                                                                    | HYDROLASE                         |
| 1S5X | THE CRYSTAL STRUCTURE OF TREMATOMUS BERNACCHII HEMOGLOBIN OXIDIZED BY AIR                                                                                                       | OXYGEN STORAGE/TRANSPORT          |
| 1S5Y | THE CRYSTAL STRUCTURE OF TREMATOMUS BERNACCHII HEMOGLOBIN OXIDIZED BY FERRICYANIDE                                                                                              | OXYGEN STORAGE/TRANSPORT          |
| 1S63 | HUMAN PROTEIN FARNESYLTRANSFERASE COMPLEXED WITH L-778,123 AND FPP                                                                                                              | TRANSFERASE                       |
| 1S64 | 3AT PROTEIN GERANYLGERANYLTRANSFERASE TYPE-I COMPLEXED WITH L-778,123 AND A SULFATE ANION                                                                                       | TRANSFERASE                       |
| 1S6B | X-RAY CRYSTAL STRUCTURE OF A COMPLEX FORMED BETWEEN TWO HOMOLOGOUS ISOFORMS OF PHOSPHOLIPASE A2 FROM NAJA NAJA SAGITTIFERA: PRINCIPLE OF MOLECULAR ASSOCIATION AND INACTIVATION | HYDROLASE                         |
| 1S6C | CRYSTAL STRUCTURE OF THE COMPLEX BETWEEN KCHIP1 AND KV4.2 N1-30                                                                                                                 | TRANSPORT PROTEIN                 |
| 1S6P | CRYSTAL STRUCTURE OF HUMAN IMMUNODEFICIENCY VIRUS TYPE 1 REVERSE TRANSCRIPTASE (RT) IN COMPLEX WITH JANSSEN-R100943                                                             | TRANSFERASE                       |
| 1S6Q | CRYSTAL STRUCTURE OF HIV-1 REVERSE TRANSCRIPTASE (RT) IN COMPLEX WITH JANSSEN-R147681                                                                                           | TRANSFERASE                       |
| 1S6V | STRUCTURE OF A CYTOCHROME C PEROXIDASE-CYTOCHROME C SITE SPECIFIC CROSS-LINK                                                                                                    | OXIDOREDUCTASE/ELECTRON TRANSPORT |
| 1S70 | COMPLEX BETWEEN PROTEIN SER/THR PHOSPHATASE-1 (DELTA) AND THE MYOSIN PHOSPHATASE TARGETING SUBUNIT 1 (MYPT1)                                                                    | HYDROLASE                         |
| 1S72 | REFINED CRYSTAL STRUCTURE OF THE HALOARCUA MARISMORTUI LARGE RIBOSOMAL SUBUNIT AT 2.4 ANGSTROM RESOLUTION                                                                       | RIBOSOME                          |
| 1S78 | INSIGHTS INTO ERBB SIGNALING FROM THE STRUCTURE OF THE ERBB2-PERTUZUMAB COMPLEX                                                                                                 | TRANSFERASE                       |
| 1S7R | CRYSTAL STRUCTURES OF THE MURINE CLASS I MAJOR HISTOCOMPATIBILITY COMPLEX H-2KB IN COMPLEX WITH LCMV-DERIVED GP33 INDEX PEPTIDE AND THREE OF ITS ESCAPE VARIANTS                | IMMUNE SYSTEM                     |
| 1S7T | CRYSTAL STRUCTURES OF THE MURINE CLASS I MAJOR HISTOCOMPATIBILITY COMPLEX H-2KB IN COMPLEX WITH LCMV-DERIVED GP33 INDEX PEPTIDE AND THREE OF ITS ESCAPE VARIANTS                | IMMUNE SYSTEM                     |
| 1S7U | CRYSTAL STRUCTURES OF THE MURINE CLASS I MAJOR HISTOCOMPATIBILITY COMPLEX H-2DB IN COMPLEX WITH LCMV-DERIVED GP33 INDEX PEPTIDE AND THREE OF ITS ESCAPE VARIANTS                | IMMUNE SYSTEM                     |
| 1S7V | CRYSTAL STRUCTURES OF THE MURINE CLASS I MAJOR HISTOCOMPATIBILITY COMPLEX H-2DB IN COMPLEX WITH LCMV-DERIVED GP33 INDEX PEPTIDE AND THREE OF ITS ESCAPE VARIANTS                | IMMUNE SYSTEM                     |
| 1S7W | CRYSTAL STRUCTURES OF THE MURINE CLASS I MAJOR HISTOCOMPATIBILITY COMPLEX H-2DB IN COMPLEX WITH LCMV-DERIVED GP33 INDEX PEPTIDE AND THREE OF ITS ESCAPE VARIANTS                | IMMUNE SYSTEM                     |

|      |                                                                                                                                                                  |                                   |
|------|------------------------------------------------------------------------------------------------------------------------------------------------------------------|-----------------------------------|
| 1S7X | CRYSTAL STRUCTURES OF THE MURINE CLASS I MAJOR HISTOCOMPATIBILITY COMPLEX H-2DB IN COMPLEX WITH LCMV-DERIVED GP33 INDEX PEPTIDE AND THREE OF ITS ESCAPE VARIANTS | IMMUNE SYSTEM                     |
| 1S8D | STRUCTURAL BASIS FOR DEGENERATE RECOGNITION OF HIV PEPTIDE VARIANTS BY CYTOTOXIC LYMPHOCYTE, VARIANT SL9-3A                                                      | IMMUNE SYSTEM                     |
| 1S9D | ARF1[DELTA 1-17]-GDP-MG IN COMPLEX WITH BREFELDIN A AND A SEC7 DOMAIN                                                                                            | PROTEIN TRANSPORT/EXCHANGE FACTOR |
| 1S9E | CRYSTAL STRUCTURE OF HIV-1 REVERSE TRANSCRIPTASE (RT) IN COMPLEX WITH JANSSEN-R129385                                                                            | TRANSFERASE                       |
| 1S9G | CRYSTAL STRUCTURE OF HIV-1 REVERSE TRANSCRIPTASE (RT) IN COMPLEX WITH JANSSEN-R120394.                                                                           | TRANSFERASE                       |
| 1S9K | CRYSTAL STRUCTURE OF HUMAN NFAT1 AND FOS-JUN ON THE IL-2 ARRE1 SITE                                                                                              | TRANSCRIPTION/DNA                 |
| 1S9V | CRYSTAL STRUCTURE OF HLA-DQ2 COMPLEXED WITH DEAMIDATED GLIADIN PEPTIDE                                                                                           | IMMUNE SYSTEM                     |
| 1S9W | CRYSTAL STRUCTURE ANALYSIS OF NY-ESO-1 EPI TOPE, SLLMWITQC, IN COMPLEX WITH HLA-A2                                                                               | IMMUNE SYSTEM                     |
| 1S9X | CRYSTAL STRUCTURE ANALYSIS OF NY-ESO-1 EPI TOPE ANALOGUE, SLLMWITQA, IN COMPLEX WITH HLA-A2                                                                      | IMMUNE SYSTEM                     |
| 1S9Y | CRYSTAL STRUCTURE ANALYSIS OF NY-ESO-1 EPI TOPE ANALOGUE, SLLMWITQS, IN COMPLEX WITH HLA-A2                                                                      | IMMUNE SYSTEM                     |
| 1SA0 | TUBULIN-COLCHICINE: STATHMIN-LIKE DOMAIN COMPLEX                                                                                                                 | CELL CYCLE                        |
| 1SA1 | TUBULIN-PODOPHYLLOTOXIN: STATHMIN-LIKE DOMAIN COMPLEX                                                                                                            | CELL CYCLE                        |
| 1SA5 | RAT PROTEIN FARNESYLTRANSFERASE COMPLEXED WITH FPP AND BMS-214662                                                                                                | TRANSFERASE                       |
| 1SB1 | NOVEL NON-COVALENT THROMBIN INHIBITORS INCORPORATING P1 4,5, 6,7-TETRAHYDROBENZOTHIAZOLE ARGININE SIDE CHAIN MIMETICS                                            | BLOOD CLOTTING, HYDROLASE         |
| 1SB2 | HIGH RESOLUTION STRUCTURE DETERMINATION OF RHODOCETIN                                                                                                            | TOXIN                             |
| 1SB3 | STRUCTURE OF 4-HYDROXYBENZOYL-COA REDUCTASE FROM THAUERA AROMATICA                                                                                               | OXIDOREDUCTASE                    |
| 1SBB | T-CELL RECEPTOR BETA CHAIN COMPLEXED WITH SUPERANTIGEN SEB                                                                                                       | IMMUNE SYSTEM                     |
| 1SBN | REFINED CRYSTAL STRUCTURES OF SUBTILISIN NOVO IN COMPLEX WITH WILD-TYPE AND TWO MUTANT EGLINS. COMPARISON WITH OTHER SERINE PROTEINASE INHIBITOR COMPLEXES       | COMPLEX(PROTEINASE/INHIBITOR)     |
| 1SBS | CRYSTAL STRUCTURE OF AN ANTI-HCG FAB                                                                                                                             | MONOCLONAL ANTIBODY               |
| 1SC1 | CRYSTAL STRUCTURE OF AN ACTIVE-SITE LIGAND-FREE FORM OF THE HUMAN CASPASE-1 C285A MUTANT                                                                         | HYDROLASE                         |
| 1SC3 | CRYSTAL STRUCTURE OF THE HUMAN CASPASE-1 C285A MUTANT IN COMPLEX WITH MALONATE                                                                                   | HYDROLASE                         |
| 1SC4 | CRYSTAL STRUCTURE OF THE HUMAN CASPASE-1 C285A MUTANT AFTER REMOVAL OF MALONATE                                                                                  | HYDROLASE                         |
| 1SC5 | SIGMA-28(FLIA)/FLGM COMPLEX                                                                                                                                      | TRANSCRIPTION                     |

|      |                                                                                                                                                                                                          |                                      |
|------|----------------------------------------------------------------------------------------------------------------------------------------------------------------------------------------------------------|--------------------------------------|
| 1SCJ | CRYSTAL STRUCTURE OF SUBTILISIN-PROPEPTIDE COMPLEX                                                                                                                                                       | HYDROLASE                            |
| 1SCM | STRUCTURE OF THE REGULATORY DOMAIN OF SCALLOP MYOSIN AT 2.8 ANGSTROMS RESOLUTION                                                                                                                         | CALCIUM-BINDING PROTEIN              |
| 1SCN | INACTIVATION OF SUBTILISIN CARLSBERG BY N-(TERT-BUTOXYCARBONYL-ALANYL-PROLYL-PHENYLALANYL)-O-BENZOYL HYDROXYLAMINE: FORMATION OF COVALENT ENZYME-INHIBITOR LINKAGE IN THE FORM OF A CARBAMATE DERIVATIVE | COMPLEX(SERINE PROTEINASE/INHIBITOR) |
| 1SCT | SCAPHARCA TETRAMERIC HEMOGLOBIN, CO-STATE                                                                                                                                                                | OXYGEN TRANSPORT                     |
| 1SCU | THE CRYSTAL STRUCTURE OF SUCCINYL-COA SYNTHETASE FROM ESCHERICHIA COLI AT 2.5 ANGSTROMS RESOLUTION                                                                                                       | LIGASE (ATP-BINDING)                 |
| 1SDB | PORCINE DESB1-2 DESPENTAPEPTIDE(B26-B30) INSULIN                                                                                                                                                         | HORMONE                              |
| 1SDD | CRYSTAL STRUCTURE OF BOVINE FACTOR VAI                                                                                                                                                                   | BLOOD CLOTTING                       |
| 1SDK | CROSS-LINKED, CARBONMONOXY HEMOGLOBIN A                                                                                                                                                                  | OXYGEN TRANSPORT                     |
| 1SDL | CROSS-LINKED, CARBONMONOXY HEMOGLOBIN A                                                                                                                                                                  | OXYGEN TRANSPORT                     |
| 1SDX | CRYSTAL STRUCTURE OF THE ZINC SATURATED C-TERMINAL HALF OF BOVINE LACTOFERRIN AT 2.0 A RESOLUTION REVEALS TWO ADDITIONAL ZINC BINDING SITES                                                              | TRANSPORT PROTEIN                    |
| 1SDZ | CRYSTAL STRUCTURE OF DIAP1 BIR1 BOUND TO A REAPER PEPTIDE                                                                                                                                                | APOPTOSIS                            |
| 1SE0 | CRYSTAL STRUCTURE OF DIAP1 BIR1 BOUND TO A GRIM PEPTIDE                                                                                                                                                  | APOPTOSIS                            |
| 1SEB | COMPLEX OF THE HUMAN MHC CLASS II GLYCOPROTEIN HLA-DR1 AND THE BACTERIAL SUPERANTIGEN SEB                                                                                                                | COMPLEX (MHC II/PEPTIDE/TOXIN)       |
| 1SEQ | FAB MNAC13                                                                                                                                                                                               | IMMUNE SYSTEM                        |
| 1SFC | NEURONAL SYNAPTIC FUSION COMPLEX                                                                                                                                                                         | TRANSPORT PROTEIN                    |
| 1SFI | HIGH RESOLUTION STRUCTURE OF A POTENT, CYCLIC PROTEASE INHIBITOR FROM SUNFLOWER SEEDS                                                                                                                    | COMPLEX (SERINE PROTEASE/INHIBITOR)  |
| 1SFO | RNA POLYMERASE II STRAND SEPARATED ELONGATION COMPLEX                                                                                                                                                    | TRANSCRIPTION/DNA/RNA                |
| 1SFQ | FAST FORM OF THROMBIN MUTANT R(77A)A BOUND TO PPACK                                                                                                                                                      | HYDROLASE                            |
| 1SG8 | CRYSTAL STRUCTURE OF THE PROCOAGULANT FAST FORM OF THROMBIN                                                                                                                                              | HYDROLASE                            |
| 1SGD | ASP 18 VARIANT OF TURKEY OVOMUCOID INHIBITOR THIRD DOMAIN COMPLEXED WITH STREPTOMYCES GRISEUS PROTEINASE B AT PH 6.5                                                                                     | HYDROLASE/HYDROLASE INHIBITOR        |
| 1SGE | GLU 18 VARIANT OF TURKEY OVOMUCOID INHIBITOR THIRD DOMAIN COMPLEXED WITH STREPTOMYCES GRISEUS PROTEINASE B AT PH 6.5                                                                                     | HYDROLASE/HYDROLASE INHIBITOR        |
| 1SGF | CRYSTAL STRUCTURE OF 7S NGF: A COMPLEX OF NERVE GROWTH FACTOR WITH FOUR BINDING PROTEINS (SERINE PROTEINASES)                                                                                            | GROWTH FACTOR                        |
| 1SGI | CRYSTAL STRUCTURE OF THE ANTICOAGULANT SLOW FORM OF THROMBIN                                                                                                                                             | HYDROLASE                            |
| 1SGN | ASN 18 VARIANT OF TURKEY OVOMUCOID INHIBITOR THIRD DOMAIN COMPLEXED WITH STREPTOMYCES GRISEUS PROTEINASE B                                                                                               | HYDROLASE/HYDROLASE INHIBITOR        |
| 1SGP | ALA 18 VARIANT OF TURKEY OVOMUCOID INHIBITOR THIRD DOMAIN COMPLEXED WITH STREPTOMYCES GRISEUS PROTEINASE B                                                                                               | COMPLEX (SERINE PROTEASE/INHIBITOR)  |



|      |                                                                                                                                                            |                                       |
|------|------------------------------------------------------------------------------------------------------------------------------------------------------------|---------------------------------------|
| 1SGQ | GLY 18 VARIANT OF TURKEY OVOMUCOID INHIBITOR THIRD DOMAIN COMPLEXED WITH STREPTOMYCES GRISEUS PROTEINASE B                                                 | COMPLEX (SERINE PROTEASE/INHIBITOR)   |
| 1SGR | LEU 18 VARIANT OF TURKEY OVOMUCOID INHIBITOR THIRD DOMAIN COMPLEXED WITH STREPTOMYCES GRISEUS PROTEINASE B                                                 | COMPLEX (SERINE PROTEASE/INHIBITOR)   |
| 1SGY | TYR 18 VARIANT OF TURKEY OVOMUCOID INHIBITOR THIRD DOMAIN COMPLEXED WITH STREPTOMYCES GRISEUS PROTEINASE B AT PH 6.5                                       | HYDROLASE/HYDROLASE INHIBITOR         |
| 1SHB | CRYSTAL STRUCTURE OF THE PHOSPHOTYROSINE RECOGNITION DOMAIN SH2 OF V-SRC COMPLEXED WITH TYROSINE-PHOSPHORYLATED PEPTIDES                                   | PHOSPHOTRANSFERASE                    |
| 1SHC | SHC PTB DOMAIN COMPLEXED WITH A TRKA RECEPTOR PHOSHOPEPTIDE, NMR, MINIMIZED AVERAGE STRUCTURE                                                              | COMPLEX (SIGNAL TRANSDUCTION/PEPTIDE) |
| 1SHD | PEPTIDE INHIBITORS OF SRC SH3-SH2-PHOSPHOPROTEIN INTERACTIONS                                                                                              | COMPLEX(TRANSFERASE/PEPTIDE)          |
| 1SHH | SLOW FORM OF THROMBIN BOUND WITH PPACK                                                                                                                     | HYDROLASE                             |
| 1SHR | CRYSTAL STRUCTURE OF FERROCYANIDE BOUND HUMAN HEMOGLOBIN A2 AT 1.88A RESOLUTION                                                                            | OXYGEN STORAGE/TRANSPORT              |
| 1SHZ | CRYSTAL STRUCTURE OF THE P115RHOGEF RGRGS DOMAIN IN A COMPLEX WITH GALPHA(13):GALPHA(11) CHIMERA                                                           | SIGNALING PROTEIN                     |
| 1SI4 | CRYSTAL STRUCTURE OF HUMAN HEMOGLOBIN A2 (IN R2 STATE) AT 2.2 A RESOLUTION                                                                                 | OXYGEN STORAGE/TRANSPORT              |
| 1SIB | REFINED CRYSTAL STRUCTURES OF SUBTILISIN NOVO IN COMPLEX WITH WILD-TYPE AND TWO MUTANT EGLINS. COMPARISON WITH OTHER SERINE PROTEINASE INHIBITOR COMPLEXES | SERINE PROTEASE/INHIBITOR COMPLEX     |
| 1SIO | STRUCTURE OF KUMAMOLISIN-AS COMPLEXED WITH A COVALENTLY-BOUND INHIBITOR, ACIPF                                                                             | HYDROLASE                             |
| 1SIW | CRYSTAL STRUCTURE OF THE APOMOLYBDO-NARGHI                                                                                                                 | OXIDOREDUCTASE                        |
| 1SJE | HLA-DR1 COMPLEXED WITH A 16 RESIDUE HIV CAPSID PEPTIDE BOUND IN A HAIRPIN CONFORMATION                                                                     | IMMUNE SYSTEM                         |
| 1SJH | HLA-DR1 COMPLEXED WITH A 13 RESIDUE HIV CAPSID PEPTIDE                                                                                                     | IMMUNE SYSTEM                         |
| 1SK6 | CRYSTAL STRUCTURE OF THE ADENYLYL CYCLASE DOMAIN OF ANTHRAX EDEMA FACTOR (EF) IN COMPLEX WITH CALMODULIN, 3',5' CYCLIC AMP (CAMP), AND PYROPHOSPHATE       | TOXIN, LYASE/METAL BINDING PROTEIN    |
| 1SKG | STRUCTURE-BASED RATIONAL DRUG DESIGN: CRYSTAL STRUCTURE OF THE COMPLEX FORMED BETWEEN PHOSPHOLIPASE A2 AND A PENTAPEPTIDE VAL-ALA-PHE-ARG-SER              | HYDROLASE                             |
| 1SKO | MP1-P14 COMPLEX                                                                                                                                            | SIGNALING PROTEIN                     |
| 1SKR | T7 DNA POLYMERASE COMPLEXED TO DNA PRIMER/TEMPLATE AND DDATP                                                                                               | TRANSFERASE/ELECTRON TRANSPORT/DNA    |
| 1SKS | BINARY 3' COMPLEX OF T7 DNA POLYMERASE WITH A DNA PRIMER/TEMPLATE CONTAINING A CIS-SYN THYMINE DIMER ON THE TEMPLATE                                       | TRANSFERASE/ELECTRON TRANSPORT/DNA    |
| 1SKU | E. COLI ASPARTATE TRANSCARBAMYLASE 240'S LOOP MUTANT (K244N)                                                                                               | TRANSFERASE                           |
| 1SKW | BINARY 3' COMPLEX OF T7 DNA POLYMERASE WITH A DNA PRIMER/TEMPLATE CONTAINING A DISORDERED CIS-SYN THYMINE DIMER ON THE TEMPLATE                            | TRANSFERASE/ELECTRON TRANSPORT/DNA    |

|      |                                                                                                                                                                                 |                                         |
|------|---------------------------------------------------------------------------------------------------------------------------------------------------------------------------------|-----------------------------------------|
| 1SKY | CRYSTAL STRUCTURE OF THE NUCLEOTIDE FREE ALPHA3BETA3 SUB-COMPLEX OF F1-ATPASE FROM THE THERMOPHILIC BACILLUS PS3                                                                | ATP SYNTHASE                            |
| 1SL0 | TERNARY 3' COMPLEX OF T7 DNA POLYMERASE WITH A DNA PRIMER/TEMPLATE CONTAINING A DISORDERED CIS-SYN THYMININE DIMER ON THE TEMPLATE AND AN INCOMING NUCLEOTIDE                   | TRANSFERASE/ELECTRON TRANSPORT/DNA      |
| 1SL1 | BINARY 5' COMPLEX OF T7 DNA POLYMERASE WITH A DNA PRIMER/TEMPLATE CONTAINING A CIS-SYN THYMININE DIMER ON THE TEMPLATE                                                          | TRANSFERASE/ELECTRON TRANSPORT/DNA      |
| 1SL2 | TERNARY 5' COMPLEX OF T7 DNA POLYMERASE WITH A DNA PRIMER/TEMPLATE CONTAINING A CIS-SYN THYMININE DIMER ON THE TEMPLATE AND AN INCOMING NUCLEOTIDE                              | TRANSFERASE/ELECTRON TRANSPORT/DNA      |
| 1SLU | RAT ANIONIC N143H, E151H TRYPSIN COMPLEXED TO A86H ECOTIN                                                                                                                       | COMPLEX (SERINE PROTEASE/INHIBITOR)     |
| 1SLV | RAT ANIONIC N143H, E151H TRYPSIN COMPLEXED TO A86H ECOTIN; COPPER-BOUND                                                                                                         | COMPLEX (SERINE PROTEASE/INHIBITOR)     |
| 1SLW | RAT ANIONIC N143H, E151H TRYPSIN COMPLEXED TO A86H ECOTIN; NICKEL-BOUND                                                                                                         | COMPLEX (SERINE PROTEASE/INHIBITOR)     |
| 1SLX | RAT ANIONIC N143H, E151H TRYPSIN COMPLEXED TO A86H ECOTIN; ZINC-BOUND                                                                                                           | COMPLEX (SERINE PROTEASE/INHIBITOR)     |
| 1SM3 | CRYSTAL STRUCTURE OF THE TUMOR SPECIFIC ANTIBODY SM3 COMPLEX WITH ITS PEPTIDE EPITOPE                                                                                           | COMPLEX (ANTIBODY/PEPTIDE EPITOPE)      |
| 1SMH | PROTEIN KINASE A VARIANT COMPLEX WITH COMPLETELY ORDERED N-TERMINAL HELIX                                                                                                       | SIGNALING PROTEIN,TRANSFERASE/INHIBITOR |
| 1SMP | CRYSTAL STRUCTURE OF A COMPLEX BETWEEN SERRATIA MARCESCENS METALLO-PROTEASE AND AN INHIBITOR FROM ERWINIA CHRYSANTHEMI                                                          | COMPLEX (METALLOPROTEASE/INHIBITOR)     |
| 1SMY | STRUCTURAL BASIS FOR TRANSCRIPTION REGULATION BY ALARMONE PPGPP                                                                                                                 | TRANSFERASE                             |
| 1SOZ | CRYSTAL STRUCTURE OF DEGS PROTEASE IN COMPLEX WITH AN ACTIVATING PEPTIDE                                                                                                        | HYDROLASE                               |
| 1SP4 | CRYSTAL STRUCTURE OF NS-134 IN COMPLEX WITH BOVINE CATHEPSIN B: A TWO HEADED EPOXYSUCCINYL INHIBITOR EXTENDS ALONG THE WHOLE ACTIVE SITE CLEFT                                  | HYDROLASE                               |
| 1SP5 | CRYSTAL STRUCTURE OF HIV-1 PROTEASE COMPLEXED WITH A PRODUCT OF AUTOPROTEOLYSIS                                                                                                 | HYDROLASE                               |
| 1SPB | SUBTILISIN BPN' PROSEGMENT (77 RESIDUES) COMPLEXED WITH A MUTANT SUBTILISIN BPN' (266 RESIDUES). CRYSTAL PH 4.6. CRYSTALLIZATION TEMPERATURE 20 C DIFFRACTION TEMPERATURE-160 C | COMPLEX (SERINE PROTEINASE/PROSEGMENT)  |
| 1SPS | BINDING OF A HIGH AFFINITY PHOSPHOTYROSYL PEPTIDE TO THE SRC SH2 DOMAIN: CRYSTAL STRUCTURES OF THE COMPLEXED AND PEPTIDE-FREE FORMS                                             | TRANSFERASE(PHOSPHOTRANSFERASE)         |
| 1SQ0 | CRYSTAL STRUCTURE OF THE COMPLEX OF THE WILD-TYPE VON WILLEBRAND FACTOR A1 DOMAIN AND GLYCOPROTEIN IB ALPHA AT 2.6 ANGSTROM RESOLUTION                                          | BLOOD CLOTTING                          |
| 1SQ2 | CRYSTAL STRUCTURE ANALYSIS OF THE NURSE SHARK NEW ANTIGEN RECEPTOR (NAR) VARIABLE DOMAIN IN COMPLEX WITH LYXOZYME                                                               | HYDROLASE/IMMUNE SYSTEM                 |

|      |                                                                                                                                                                                             |                                    |
|------|---------------------------------------------------------------------------------------------------------------------------------------------------------------------------------------------|------------------------------------|
| 1SQB | CRYSTAL STRUCTURE ANALYSIS OF BOVINE BC1 WITH AZOXYSTROBIN                                                                                                                                  | OXIDOREDUCTASE                     |
| 1SQK | CRYSTAL STRUCTURE OF CIBOULOT IN COMPLEX WITH SKELETAL ACTIN                                                                                                                                | STRUCTURAL PROTEIN/PROTEIN BINDING |
| 1SQP | CRYSTAL STRUCTURE ANALYSIS OF BOVINE BC1 WITH MYXOTHIAZOL                                                                                                                                   | OXIDOREDUCTASE                     |
| 1SQQ | CRYSTAL STRUCTURE ANALYSIS OF BOVINE BC1 WITH METHOXY ACRYLATE STILBENE (MOAS)                                                                                                              | OXIDOREDUCTASE                     |
| 1SQV | CRYSTAL STRUCTURE ANALYSIS OF BOVINE BC1 WITH UHDBT                                                                                                                                         | OXIDOREDUCTASE                     |
| 1SQX | CRYSTAL STRUCTURE ANALYSIS OF BOVINE BC1 WITH STIGMATELLIN A                                                                                                                                | OXIDOREDUCTASE                     |
| 1SQZ | DESIGN OF SPECIFIC INHIBITORS OF PHOPHOLIPASE A2: CRYSTAL STRUCTURE OF THE COMPLEX FORMED BETWEEN GROUPII PHOPHOLIPASE A2 AND A DESIGNED PEPTIDE DEHYDRO-ILE-ALA-ARG-SER AT 1.2A RESOLUTION | TOXIN                              |
| 1SR4 | CRYSTAL STRUCTURE OF THE HAEMOPHILUS DUCREYI CYTOLETHAL DISTENDING TOXIN                                                                                                                    | TOXIN                              |
| 1SR5 | ANTITHROMBIN-ANHYDROTHROMBIN-HEPARIN TERNARY COMPLEX STRUCTURE                                                                                                                              | HYDROLASE/HYDROLASE INHIBITOR      |
| 1SR6 | STRUCTURE OF NUCLEOTIDE-FREE SCALLOP MYOSIN S1                                                                                                                                              | CONTRACTILE PROTEIN                |
| 1SRN | THE REFINED CRYSTAL STRUCTURE OF A FULLY ACTIVE SEMISYNTHETIC RIBONUCLEASE AT 1.8 ANGSTROMS RESOLUTION                                                                                      | HYDROLASE (NUCLEIC ACID,RNA)       |
| 1SSA | A STRUCTURAL INVESTIGATION OF CATALYTICALLY MODIFIED F120L AND F120Y SEMISYNTHETIC RIBONUCLEASES                                                                                            | HYDROLASE(ENDORIBONUCLEASE)        |
| 1SSB | A STRUCTURAL INVESTIGATION OF CATALYTICALLY MODIFIED F120L AND F120Y SEMISYNTHETIC RIBONUCLEASES                                                                                            | HYDROLASE(ENDORIBONUCLEASE)        |
| 1SSC | THE 1.6 ANGSTROMS STRUCTURE OF A SEMISYNTHETIC RIBONUCLEASE CRYSTALLIZED FROM AQUEOUS ETHANOL. COMPARISON WITH CRYSTALS FROM SALT SOLUTIONS AND WITH RNASE A FROM AQUEOUS ALCOHOL SOLUTIONS | ENDONUCLEASE                       |
| 1STC | CAMP-DEPENDENT PROTEIN KINASE, ALPHA-CATALYTIC SUBUNIT IN COMPLEX WITH STAUROSPORINE                                                                                                        | COMPLEX (TRANSFERASE/INHIBITOR)    |
| 1STF | THE REFINED 2.4 ANGSTROMS X-RAY CRYSTAL STRUCTURE OF RECOMBINANT HUMAN STEFIN B IN COMPLEX WITH THE CYSTEINE PROTEINASE PAPAINE: A NOVEL TYPE OF PROTEINASE INHIBITOR INTERACTION           | HYDROLASE(SULFHYDRYL PROTEINASE)   |
| 1SUA | SUBTILISIN BPN'                                                                                                                                                                             | COMPLEX (HYDROLASE/PEPTIDE)        |
| 1SUQ | CRYSTAL STRUCTURE OF HIV-1 REVERSE TRANSCRIPTASE (RT) IN COMPLEX WITH JANSSEN-R185545                                                                                                       | TRANSFERASE                        |
| 1SUV | STRUCTURE OF HUMAN TRANSFERRIN RECEPTOR-TRANSFERRIN COMPLEX                                                                                                                                 | METAL TRANSPORT                    |
| 1SUY | NMR STRUCTURE OF THE THKAIA180C-CIIABD COMPLEX (AVERAGE MINIMIZED STRUCTURE)                                                                                                                | CIRCADIAN CLOCK PROTEIN            |
| 1SV0 | CRYSTAL STRUCTURE OF YAN-SAM/MAE-SAM COMPLEX                                                                                                                                                | TRANSCRIPTION                      |
| 1SV5 | CRYSTAL STRUCTURE OF K103N MUTANT HIV-1 REVERSE TRANSCRIPTASE (RT) IN COMPLEX WITH JANSSEN-R165335                                                                                          | TRANSFERASE                        |
| 1SVD | THE STRUCTURE OF HALOTHIOBACILLUS NEAPOLITANUS RUBISCO                                                                                                                                      | LYASE                              |

|      |                                                                                                                                                        |                                       |
|------|--------------------------------------------------------------------------------------------------------------------------------------------------------|---------------------------------------|
| 1SVF | PARAMYXOVIRUS SV5 FUSION PROTEIN CORE                                                                                                                  | VIRAL PROTEIN                         |
| 1SVG | CRYSTAL STRUCTURE OF PROTEIN KINASE A IN COMPLEX WITH AZEPANE DERIVATIVE 4                                                                             | TRANSFERASE                           |
| 1SVH | CRYSTAL STRUCTURE OF PROTEIN KINASE A IN COMPLEX WITH AZEPANE DERIVATIVE 8                                                                             | TRANSFERASE                           |
| 1SVX | CRYSTAL STRUCTURE OF A DESIGNED SELECTED ANKYRIN REPEAT PROTEIN IN COMPLEX WITH THE MALTOSE BINDING PROTEIN                                            | DE NOVO PROTEIN/SUGAR BINDING PROTEIN |
| 1SX4 | GROEL-GROES-ADP7                                                                                                                                       | CHAPERONE                             |
| 1SXJ | CRYSTAL STRUCTURE OF THE EUKARYOTIC CLAMP LOADER (REPLICATION FACTOR C, RFC) BOUND TO THE DNA SLIDING CLAMP (PROLIFERATING CELL NUCLEAR ANTIGEN, PCNA) | REPLICATION                           |
| 1SY6 | CRYSTAL STRUCTURE OF CD3GAMMAEPSILON HETERODIMER IN COMPLEX WITH OKT3 FAB FRAGMENT                                                                     | SIGNALING PROTEIN/ANTIBIOTIC          |
| 1SYQ | HUMAN VINCULIN HEAD DOMAIN VH1, RESIDUES 1-258, IN COMPLEX WITH HUMANTALIN'S VINCULIN BINDING SITE 1, RESIDUES 607-636                                 | CELL ADHESION                         |
| 1SYS | CRYSTAL STRUCTURE OF HLA, B*4403, AND PEPTIDE EEPTVIKKY                                                                                                | IMMUNE SYSTEM                         |
| 1SYV | HLA-B*4405 COMPLEXED TO THE DOMINANT SELF LIGAND EEFGRAYGF                                                                                             | IMMUNE SYSTEM                         |
| 1SYX | THE CRYSTAL STRUCTURE OF A BINARY U5 SNRNP COMPLEX                                                                                                     | TRANSLATION/IMMUNE SYSTEM             |
| 1SZ6 | MISTLETOE LECTIN I FROM VISCUM ALBUM. CRYSTAL STRUCTURE AT 2.05 Å RESOLUTION                                                                           | HYDROLASE INHIBITOR                   |
| 1SZA | THE RNA POLYMERASE II CTD IN MRNA PROCESSING: BETA-TURN RECOGNITION AND BETA-SPIRAL MODEL                                                              | TRANSCRIPTION                         |
| 1SZC | STRUCTURAL BASIS FOR NICOTINAMIDE CLEAVAGE AND ADP-RIBOSE TRANSFER BY NAD <sup>+</sup> -DEPENDENT SIR2 HISTONE/PROTEIN DEACETYLASES                    | GENE REGULATION                       |
| 1SZD | STRUCTURAL BASIS FOR NICOTINAMIDE CLEAVAGE AND ADP-RIBOSE TRANSFER BY NAD <sup>+</sup> -DEPENDENT SIR2 HISTONE/PROTEIN DEACETYLASES                    | GENE REGULATION                       |
| 1T01 | VINCULIN COMPLEXED WITH THE VBS1 HELIX FROM TALIN                                                                                                      | CELL ADHESION, STRUCTURAL PROTEIN     |
| 1T03 | HIV-1 REVERSE TRANSCRIPTASE CROSSLINKED TO TENOFOVIR TERMINATED TEMPLATE-PRIMER (COMPLEX P)                                                            | TRANSFERASE/ANTIBODY/DNA              |
| 1T04 | THREE DIMENSIONAL STRUCTURE OF A HUMANIZED ANTI-IFN-GAMMA FAB IN C2 SPACE GROUP                                                                        | IMMUNE SYSTEM                         |
| 1T05 | HIV-1 REVERSE TRANSCRIPTASE CROSSLINKED TO TEMPLATE-PRIMER WITH TENOFOVIR-DIPHOSPHATE BOUND AS THE INCOMING NUCLEOTIDE SUBSTRATE                       | TRANSFERASE/DNA                       |
| 1T08 | CRYSTAL STRUCTURE OF BETA-CATENIN/ICAT HELICAL DOMAIN/UNPHOSPHORYLATED APC R3                                                                          | CELL ADHESION/CELL CYCLE              |
| 1T0F | CRYSTAL STRUCTURE OF THE TNSA/TNSC(504-555) COMPLEX                                                                                                    | DNA BINDING PROTEIN                   |
| 1T0H | CRYSTAL STRUCTURE OF THE RATTUS NORVEGICUS VOLTAGE GATED CALCIUM CHANNEL BETA SUBUNIT ISOFORM 2A                                                       | SIGNALING PROTEIN                     |
| 1T0J | CRYSTAL STRUCTURE OF A COMPLEX BETWEEN VOLTAGE-GATED CALCIUM CHANNEL BETA2A SUBUNIT AND A PEPTIDE OF THE                                               | SIGNALING PROTEIN                     |

## ALPHA1C SUBUNIT

|      |                                                                                                                                                        |                                     |
|------|--------------------------------------------------------------------------------------------------------------------------------------------------------|-------------------------------------|
| 1T0K | JOINT X-RAY AND NMR REFINEMENT OF YEAST L30E-MRNA COMPLEX                                                                                              | RIBOSOME                            |
| 1T0M | CONFORMATIONAL SWITCH IN POLYMORPHIC H-2K MOLECULES CONTAINING AN HSV PEPTIDE                                                                          | IMMUNE SYSTEM                       |
| 1T0N | CONFORMATIONAL SWITCH IN POLYMORPHIC H-2K MOLECULES CONTAINING AN HSV PEPTIDE                                                                          | IMMUNE SYSTEM                       |
| 1T0P | STRUCTURAL BASIS OF ICAM RECOGNITION BY INTEGRIN ALPHAHLBETA2 REVEALED IN THE COMPLEX STRUCTURE OF BINDING DOMAINS OF ICAM-3 AND ALPHALBETA2 AT 1.65 Å | IMMUNE SYSTEM                       |
| 1T0Q | STRUCTURE OF THE TOLUENE/O-XYLENE MONOOXYGENASE HYDROXYLASE                                                                                            | OXIDOREDUCTASE                      |
| 1T0R | CRYSTAL STRUCTURE OF THE TOLUENE/O-XYLENE MONOOXYGENASE HYDROXYLASE FROM PSEUDOMONAS STUTZERI-AZIDE BOUND                                              | OXIDOREDUCTASE                      |
| 1T0S | STRUCTURE OF THE TOLUENE/O-XYLENE MONOOXYGENASE HYDROXYLASE WITH 4-BROMOPHENOL BOUND                                                                   | OXIDOREDUCTASE                      |
| 1T15 | CRYSTAL STRUCTURE OF THE BRCA1 BRCT DOMAINS IN COMPLEX WITH THE PHOSPHORYLATED INTERACTING REGION FROM BACH1 HELICASE                                  | ANTITUMOR PROTEIN                   |
| 1T1N | CRYSTAL STRUCTURE OF CARBONMONOXY HEMOGLOBIN                                                                                                           | OXYGEN TRANSPORT                    |
| 1T1W | STRUCTURAL BASIS FOR DEGENERATE RECOGNITION OF HIV PEPTIDE VARIANTS BY CYTOTOXIC LYMPHOCYTE, VARIANT SL9-3F6I8V                                        | IMMUNE SYSTEM                       |
| 1T1X | STRUCTURAL BASIS FOR DEGENERATE RECOGNITION OF HIV PEPTIDE VARIANTS BY CYTOTOXIC LYMPHOCYTE, VARIANT SL9-4L                                            | IMMUNE SYSTEM                       |
| 1T1Y | STRUCTURAL BASIS FOR DEGENERATE RECOGNITION OF HIV PEPTIDE VARIANTS BY CYTOTOXIC LYMPHOCYTE, VARIANT SL9-5V                                            | IMMUNE SYSTEM                       |
| 1T1Z | STRUCTURAL BASIS FOR DEGENERATE RECOGNITION OF HIV PEPTIDE VARIANTS BY CYTOTOXIC LYMPHOCYTE, VARIANT SL9-6A                                            | IMMUNE SYSTEM                       |
| 1T20 | STRUCTURAL BASIS FOR DEGENERATE RECOGNITION OF HIV PEPTIDE VARIANTS BY CYTOTOXIC LYMPHOCYTE, VARIANT SL9-6I                                            | IMMUNE SYSTEM                       |
| 1T21 | STRUCTURAL BASIS FOR DEGENERATE RECOGNITION OF HIV PEPTIDE VARIANTS BY CYTOTOXIC LYMPHOCYTE, VARIANT SL9, MONOCLINIC CRYSTAL                           | IMMUNE SYSTEM                       |
| 1T22 | STRUCTURAL BASIS FOR DEGENERATE RECOGNITION OF HIV PEPTIDE VARIANTS BY CYTOTOXIC LYMPHOCYTE, VARIANT SL9, ORTHORHOMBIC CRYSTAL                         | IMMUNE SYSTEM                       |
| 1T29 | CRYSTAL STRUCTURE OF THE BRCA1 BRCT REPEATS BOUND TO A PHOSPHORYLATED BACH1 PEPTIDE                                                                    | SIGNALING PROTEIN                   |
| 1T2K | STRUCTURE OF THE DNA BINDING DOMAINS OF IRF3, ATF-2 AND JUN BOUND TO DNA                                                                               | TRANSCRIPTION/DNA                   |
| 1T2Q | THE CRYSTAL STRUCTURE OF AN NNA7 FAB THAT RECOGNIZES AN N-TYPE BLOOD GROUP ANTIGEN                                                                     | IMMUNE SYSTEM                       |
| 1T2V | STRUCTURAL BASIS OF PHOSPHO-PEPTIDE RECOGNITION BY THE BRCT DOMAIN OF BRCA1, STRUCTURE WITH PHOSHOPEPTIDE                                              | ANTITUMOR PROTEIN                   |
| 1T34 | ROTATION MECHANISM FOR TRANSMEMBRANE SIGNALING BY THE ATRIAL NATRIURETIC PEPTIDE RECEPTOR                                                              | SIGNALING PROTEIN, MEMBRANE PROTEIN |

|      |                                                                                                                                                                                                |                                      |
|------|------------------------------------------------------------------------------------------------------------------------------------------------------------------------------------------------|--------------------------------------|
| 1T36 | CRYSTAL STRUCTURE OF E. COLI CARBAMOYL PHOSPHATE SYNTHETASE SMALL SUBUNIT MUTANT C248D COMPLEXED WITH URIDINE 5'-MONOPHOSPHATE                                                                 | LIGASE                               |
| 1T37 | DESIGN OF SPECIFIC INHIBITORS OF PHOSPHOLIPASE A2: CRYSTAL STRUCTURE OF THE COMPLEX FORMED BETWEEN GROUP I PHOSPHOLIPASE A2 AND A DESIGNED PENTAPEPTIDE LEU-ALA-ILE-TYR-SER AT 2.6Å RESOLUTION | HYDROLASE                            |
| 1T3E | STRUCTURAL BASIS OF DYNAMIC GLYCINE RECEPTOR CLUSTERING                                                                                                                                        | STRUCTURAL PROTEIN/SIGNALING PROTEIN |
| 1T3F | THREE DIMENSIONAL STRUCTURE OF A HUMANIZED ANTI-IFN-GAMMA FAB (HUZAF) IN P21 21 21 SPACE GROUP                                                                                                 | IMMUNE SYSTEM                        |
| 1T3L | STRUCTURAL ANALYSIS OF THE VOLTAGE-DEPENDENT CALCIUM CHANNEL BETA SUBUNIT FUNCTIONAL CORE IN COMPLEX WITH ALPHA1 INTERACTION DOMAIN                                                            | TRANSPORT PROTEIN                    |
| 1T3M | STRUCTURE OF THE ISOASPARTYL PEPTIDASE WITH L-ASPARAGINASE ACTIVITY FROM E. COLI                                                                                                               | HYDROLASE                            |
| 1T3Q | CRYSTAL STRUCTURE OF QUINOLINE 2-OXIDOREDUCTASE FROM PSEUDOMONAS PUTIDA 86                                                                                                                     | OXIDOREDUCTASE                       |
| 1T44 | STRUCTURAL BASIS OF ACTIN SEQUESTRATION BY THYMOSIN-B4: IMPLICATIONS FOR ARP2/3 ACTIVATION                                                                                                     | STRUCTURAL PROTEIN                   |
| 1T4C | FORMYL-COA TRANSFERASE IN COMPLEX WITH OXALYL-COA                                                                                                                                              | TRANSFERASE                          |
| 1T4F | STRUCTURE OF HUMAN MDM2 IN COMPLEX WITH AN OPTIMIZED P53 PEPTIDE                                                                                                                               | LIGASE                               |
| 1T4K | CRYSTAL STRUCTURE OF UNLIGANDED ALDOLASE ANTIBODY 93F3 FAB                                                                                                                                     | IMMUNE SYSTEM                        |
| 1T4U | CRYSTAL STRUCTURE ANALYSIS OF A NOVEL OXYGUANIDINE BOUND TO THROMBIN                                                                                                                           | HYDROLASE                            |
| 1T4V | CRYSTAL STRUCTURE ANALYSIS OF A NOVEL OXYGUANIDINE BOUND TO THROMBIN                                                                                                                           | HYDROLASE                            |
| 1T5W | HLA-DR1 IN COMPLEX WITH A SYNTHETIC PEPTIDE (AAYSQATPLLLSPR)                                                                                                                                   | IMMUNE SYSTEM                        |
| 1T5X | HLA-DR1 IN COMPLEX WITH A SYNTHETIC PEPTIDE (AAYSQATPLLLSPR) AND THE SUPERANTIGEN SEC3-3B2                                                                                                     | IMMUNE SYSTEM                        |
| 1T5Z | CRYSTAL STRUCTURE OF THE ANDROGEN RECEPTOR LIGAND BINDING DOMAIN (LBD) WITH DHT AND A PEPTIDE DERIVED FROM ITS PHYSIOLOGICAL COACTIVATOR ARA70                                                 | HORMONE/GROWTH FACTOR                |
| 1T60 | CRYSTAL STRUCTURE OF TYPE IV COLLAGEN NC1 DOMAIN FROM BOVINE LENS CAPSULE                                                                                                                      | STRUCTURAL PROTEIN                   |
| 1T61 | CRYSTAL STRUCTURE OF COLLAGEN IV NC1 DOMAIN FROM PLACENTA BASEMENT MEMBRANE                                                                                                                    | STRUCTURAL PROTEIN                   |
| 1T63 | CRYSTAL STRUCTURE OF THE ANDROGEN RECEPTOR LIGAND BINDING DOMAIN WITH DHT AND A PEPTIDE DERIVED FROM ITS PHYSIOLOGICAL COACTIVATOR GRIP1 NR BOX3                                               | HORMONE/GROWTH FACTOR                |
| 1T65 | CRYSTAL STRUCTURE OF THE ANDROGEN RECEPTOR LIGAND BINDING DOMAIN WITH DHT AND A PEPTIDE DERIVED FROM ITS PHYSIOLOGICAL COACTIVATOR GRIP1 NR BOX 2 BOUND IN A NON-HELICAL CONFORMATION          | HORMONE/GROWTH FACTOR                |

|      |                                                                                                                                                     |                                    |
|------|-----------------------------------------------------------------------------------------------------------------------------------------------------|------------------------------------|
| 1T66 | THE STRUCTURE OF FAB WITH INTERMEDIATE AFFINITY FOR FLUORESCIEIN.                                                                                   | IMMUNE SYSTEM                      |
| 1T6B | CRYSTAL STRUCTURE OF B. ANTHRACIS PROTECTIVE ANTIGEN COMPLEXED WITH HUMAN ANTHRAX TOXIN RECEPTOR                                                    | MEMBRANE PROTEIN/TOXIN             |
| 1T6O | NUCLEOCAPSID-BINDING DOMAIN OF THE MEASLES VIRUS P PROTEIN (AMINO ACIDS 457-507) IN COMPLEX WITH AMINO ACIDS 486-505 OF THE MEASLES VIRUS N PROTEIN | VIRAL PROTEIN                      |
| 1T6V | CRYSTAL STRUCTURE ANALYSIS OF THE NURSE SHARK NEW ANTIGEN RECEPTOR (NAR) VARIABLE DOMAIN IN COMPLEX WITH LYSOZYME                                   | HYDROLASE/IMMUNE SYSTEM            |
| 1T73 | CRYSTAL STRUCTURE OF THE ANDROGEN RECEPTOR LIGAND BINDING DOMAIN IN COMPLEX WITH A FXXFF MOTIF                                                      | HORMONE/GROWTH FACTOR RECEPTOR     |
| 1T74 | CRYSTAL STRUCTURE OF THE ANDROGEN RECEPTOR LIGAND BINDING DOMAIN IN COMPLEX WITH A WXXLF MOTIF                                                      | HORMONE/GROWTH FACTOR RECEPTOR     |
| 1T76 | CRYSTAL STRUCTURE OF THE ANDROGEN RECEPTOR LIGAND BINDING DOMAIN IN COMPLEX WITH A WXXVW MOTIF                                                      | HORMONE/GROWTH FACTOR RECEPTOR     |
| 1T79 | CRYSTAL STRUCTURE OF THE ANDROGEN RECEPTOR LIGAND BINDING DOMAIN IN COMPLEX WITH A FXXLW MOTIF                                                      | HORMONE/GROWTH FACTOR RECEPTOR     |
| 1T7C | CRYSTAL STRUCTURE OF THE P1 GLU BPTI MUTANT- BOVINE CHYMOTRYPSIN COMPLEX                                                                            | HYDROLASE/HYDROLASE INHIBITOR      |
| 1T7F | CRYSTAL STRUCTURE OF THE ANDROGEN RECEPTOR LIGAND BINDING DOMAIN IN COMPLEX WITH A LXXLL MOTIF                                                      | HORMONE/GROWTH FACTOR RECEPTOR     |
| 1T7M | CRYSTAL STRUCTURE OF THE ANDROGEN RECEPTOR LIGAND BINDING DOMAIN IN COMPLEX WITH A FXXYF MOTIF                                                      | HORMONE/GROWTH FACTOR RECEPTOR     |
| 1T7P | T7 DNA POLYMERASE COMPLEXED TO DNA PRIMER/TEMPLATE, A NUCLEOSIDE TRIPHOSPHATE, AND ITS PROCESSIVITY FACTOR THIOREDIXIN                              | TRANSFERASE/DNA                    |
| 1T7R | CRYSTAL STRUCTURE OF THE ANDROGEN RECEPTOR LIGAND BINDING DOMAIN IN COMPLEX WITH A FXXLF MOTIF                                                      | HORMONE/GROWTH FACTOR RECEPTOR     |
| 1T83 | CRYSTAL STRUCTURE OF A HUMAN TYPE III FC GAMMA RECEPTOR IN COMPLEX WITH AN FC FRAGMENT OF IGG1 (ORTHORHOMBIC)                                       | IMMUNE SYSTEM                      |
| 1T89 | CRYSTAL STRUCTURE OF A HUMAN TYPE III FC GAMMA RECEPTOR IN COMPLEX WITH AN FC FRAGMENT OF IGG1 (HEXAGONAL)                                          | IMMUNE SYSTEM                      |
| 1T8E | T7 DNA POLYMERASE TERNARY COMPLEX WITH DCTP AT THE INSERTION SITE.                                                                                  | TRANSFERASE/ELECTRON TRANSPORT/DNA |
| 1T8L | CRYSTAL STRUCTURE OF THE P1 MET BPTI MUTANT- BOVINE CHYMOTRYPSIN COMPLEX                                                                            | HYDROLASE/HYDROLASE INHIBITOR      |
| 1T8M | CRYSTAL STRUCTURE OF THE P1 HIS BPTI MUTANT- BOVINE CHYMOTRYPSIN COMPLEX                                                                            | HYDROLASE/HYDROLASE INHIBITOR      |
| 1T8N | CRYSTAL STRUCTURE OF THE P1 THR BPTI MUTANT- BOVINE CHYMOTRYPSIN COMPLEX                                                                            | HYDROLASE/HYDROLASE INHIBITOR      |
| 1T8O | CRYSTAL STRUCTURE OF THE P1 TRP BPTI MUTANT- BOVINE CHYMOTRYPSIN COMPLEX                                                                            | HYDROLASE/HYDROLASE INHIBITOR      |
| 1T9G | STRUCTURE OF THE HUMAN MCAD:ETF COMPLEX                                                                                                             | OXIDOREDUCTASE, ELECTRON TRANSPORT |
| 1TA3 | CRYSTAL STRUCTURE OF XYLANASE (GH10) IN COMPLEX WITH                                                                                                | HYDROLASE INHIBITOR/HYDROLASE      |

| INHIBITOR (XIP) |                                                                                                                                                                             |                                       |
|-----------------|-----------------------------------------------------------------------------------------------------------------------------------------------------------------------------|---------------------------------------|
| 1TAB            | STRUCTURE OF THE TRYPSIN-BINDING DOMAIN OF BOWMAN-BIRK TYPE PROTEASE INHIBITOR AND ITS INTERACTION WITH TRYPSIN                                                             | HYDROLASE (SERINE PROTEINASE)         |
| 1TAW            | BOVINE TRYPSIN COMPLEXED TO APPI                                                                                                                                            | COMPLEX (SERINE PROTEASE/INHIBITOR)   |
| 1TB6            | 2.5A CRYSTAL STRUCTURE OF THE ANTITHROMBIN-THROMBIN-HEPARIN TERNARY COMPLEX                                                                                                 | HYDROLASE/BLOOD CLOTTING              |
| 1TBG            | BETA-GAMMA DIMER OF THE HETEROTRIMERIC G-PROTEIN TRANSDUCIN                                                                                                                 | COMPLEX (GTP-BINDING/TRANSDUCER)      |
| 1TBQ            | CRYSTAL STRUCTURE OF INSECT DERIVED DOUBLE DOMAIN KAZAL INHIBITOR RHODNIIN IN COMPLEX WITH THROMBIN                                                                         | COMPLEX (SERINE PROTEASE/INHIBITOR)   |
| 1TBR            | CRYSTAL STRUCTURE OF INSECT DERIVED DOUBLE DOMAIN KAZAL INHIBITOR RHODNIIN IN COMPLEX WITH THROMBIN                                                                         | COMPLEX (SERINE PROTEASE/INHIBITOR)   |
| 1TBZ            | HUMAN THROMBIN WITH ACTIVE SITE N-METHYL-D PHENYLALANYL-N-[5-(AMINOIMINOMETHYL)AMINO]-1-{{BENZOTHAZOLYL}CARBONYL] BUTYL]-L-PROLINAMIDE TRIFLUOROACETATE AND EXOSITE-HIRUGEN | COMPLEX (SERINE PROTEASE/INHIBITOR)   |
| 1TCE            | SOLUTION NMR STRUCTURE OF THE SHC SH2 DOMAIN COMPLEXED WITH A TYROSINE-PHOSPHORYLATED PEPTIDE FROM THE T-CELL RECEPTOR, MINIMIZED AVERAGE STRUCTURE                         | COMPLEX (SIGNAL TRANSDUCTION/PEPTIDE) |
| 1TCO            | TERNARY COMPLEX OF A CALCINEURIN A FRAGMENT, CALCINEURIN B, FKBP12 AND THE IMMUNOSUPPRESSANT DRUG FK506 (TACROLIMUS)                                                        | COMPLEX (HYDROLASE/ISOMERASE)         |
| 1TCR            | MURINE T-CELL ANTIGEN RECEPTOR 2C CLONE                                                                                                                                     | RECEPTOR                              |
| 1TDQ            | STRUCTURAL BASIS FOR THE INTERACTIONS BETWEEN TENASCINS AND THE C-TYPE LECTIN DOMAINS FROM LECTICANS: EVIDENCE FOR A CROSS-LINKING ROLE FOR TENASCINS                       | EXTRACELLULAR MATRIX                  |
| 1TDV            | NON-SPECIFIC BINDING TO PHOSPHOLIPASE A2:CRYSTAL STRUCTURE OF THE COMPLEX OF PLA2 WITH A DESIGNED PEPTIDE TYR-TRP-ALA-ALA-ALA-ALA AT 1.7A RESOLUTION                        | HYDROLASE                             |
| 1TE1            | CRYSTAL STRUCTURE OF FAMILY 11 XYLANASE IN COMPLEX WITH INHIBITOR (XIP-1)                                                                                                   | HYDROLASE INHIBITOR/HYDROLASE         |
| 1TEC            | CRYSTALLOGRAPHIC REFINEMENT BY INCORPORATION OF MOLECULAR DYNAMICS. THE THERMOSTABLE SERINE PROTEASE THERMITASE COMPLEXED WITH EGLIN-C                                      | COMPLEX(SERINE PROTEINASE-INHIBITOR)  |
| 1TET            | CRYSTAL STRUCTURE OF AN ANTICHOLERA TOXIN PEPTIDE COMPLEX AT 2.3 ANGSTROMS                                                                                                  | IMMUNOGLOBULIN                        |
| 1TF0            | CRYSTAL STRUCTURE OF THE GA MODULE COMPLEXED WITH HUMAN SERUM ALBUMIN                                                                                                       | PROTEIN BINDING                       |
| 1TFC            | CRYSTAL STRUCTURE OF THE LIGAND-BINDING DOMAIN OF THE ESTROGEN-RELATED RECEPTOR GAMMA IN COMPLEX WITH A STEROID RECEPTOR COACTIVATOR-1 PEPTIDE                              | TRANSCRIPTION                         |
| 1TFK            | RIBONUCLEASE FROM ESCHERICHIA COLI COMPLEXED WITH ITS INHIBITOR PROTEIN                                                                                                     | TOXIN/TOXIN INHIBITOR                 |
| 1TFM            | CRYSTAL STRUCTURE OF A RIBOSOME INACTIVATING PROTEIN IN ITS NATURALLY INHIBITED FORM                                                                                        | TOXIN                                 |
| 1TFO            | RIBONUCLEASE FROM ESCHERICHIA COLI COMPLEXED WITH ITS INHIBITOR PROTEIN                                                                                                     | TOXIN/TOXIN INHIBITOR                 |



|      |                                                                                                                                                                                                                                       |                                 |
|------|---------------------------------------------------------------------------------------------------------------------------------------------------------------------------------------------------------------------------------------|---------------------------------|
| 1TG1 | CRYSTAL STRUCTURE OF THE COMPLEX FORMED BETWEEN RUSSELLS VIPER PHOSPHOLIPASE A2 AND A DESIGNED PEPTIDE INHIBITOR CBZ-DEHYDRO-LEU-VAL-ARG-TYR AT 1.2A RESOLUTION                                                                       | HYDROLASE                       |
| 1TG4 | DESIGN OF SPECIFIC INHIBITORS OF GROUP II PHOSPHOLIPASE A2(PLA2); CRYSTAL STRUCTURE OF THE COMPLEX FORMED BETWEEN RUSSELLS VIPER PLA2 AND DESIGNED PEPTIDE PHE-LEU-ALA-TYR-LYS AT 1.7A RESOLUTION                                     | HYDROLASE                       |
| 1TGS | THREE-DIMENSIONAL STRUCTURE OF THE COMPLEX BETWEEN PANCREATIC SECRETORY INHIBITOR (KAZAL TYPE) AND TRYPSINOGEN AT 1.8 ANGSTROMS RESOLUTION. STRUCTURE SOLUTION, CRYSTALLOGRAPHIC REFINEMENT AND PRELIMINARY STRUCTURAL INTERPRETATION | COMPLEX (PROTEINASE/INHIBITOR)  |
| 1TGZ | STRUCTURE OF HUMAN SENP2 IN COMPLEX WITH SUMO-1                                                                                                                                                                                       | CELL CYCLE, HYDROLASE           |
| 1TH1 | BETA-CATENIN IN COMPLEX WITH A PHOSPHORYLATED APC 20AA REPEAT FRAGMENT                                                                                                                                                                | CELL ADHESION/ANTITUMOR PROTEIN |
| 1TH8 | CRYSTAL STRUCTURES OF THE ADP AND ATP BOUND FORMS OF THE BACILLUS ANTI-SIGMA FACTOR SPOIIAB IN COMPLEX WITH THE ANTI-ANTI-SIGMA SPOIIAA: INHIBITORY COMPLEX WITH ADP, CRYSTAL FORM II                                                 | TRANSCRIPTION                   |
| 1THB | REFINEMENT OF A PARTIALLY OXYGENATED T STATE HAEMOGLOBIN AT 1.5 ANGSTROMS RESOLUTION                                                                                                                                                  | OXYGEN TRANSPORT                |
| 1THN | CRYSTAL STRUCTURES OF THE ADP AND ATP BOUND FORMS OF THE BACILLUS ANTI-SIGMA FACTOR SPOIIAB IN COMPLEX WITH THE ANTI-ANTI-SIGMA SPOIIAA: INHIBITORY COMPLEX WITH ADP, CRYSTAL FORM I                                                  | TRANSCRIPTION                   |
| 1THP | STRUCTURE OF HUMAN ALPHA-THROMBIN Y225P MUTANT BOUND TO D-PHE-PRO-ARG-CHLOROMETHYLKETONE                                                                                                                                              | SERINE PROTEASE                 |
| 1THR | STRUCTURES OF THROMBIN COMPLEXES WITH A DESIGNED AND A NATURAL EXOSITE INHIBITOR                                                                                                                                                      | HYDROLASE(SERINE PROTEINASE)    |
| 1THS | STRUCTURES OF THROMBIN COMPLEXES WITH A DESIGNED AND A NATURAL EXOSITE INHIBITOR                                                                                                                                                      | HYDROLASE(SERINE PROTEINASE)    |
| 1TI2 | CRYSTAL STRUCTURE OF PYROGALLOL-PHLOROGLUCINOL TRANSHYDROXYLASE FROM PELOBACTER ACIDIGALLICI                                                                                                                                          | OXIDOREDUCTASE                  |
| 1TI4 | CRYSTAL STRUCTURE OF PYROGALLOL-PHLOROGLUCINOL TRANSHYDROXYLASE FROM PELOBACTER ACIDIGALLICI COMPLEXED WITH PYROGALLOL                                                                                                                | OXIDOREDUCTASE                  |
| 1TI6 | CRYSTAL STRUCTURE OF PYROGALLOL-PHLOROGLUCINOL TRANSHYDROXYLASE FROM PELOBACTER ACIDIGALLICI COMPLEXED WITH INHIBITOR 1,2,4,5-TETRAHYDROXY-BENZENE                                                                                    | OXIDOREDUCTASE                  |
| 1TI8 | H7 HAEMAGGLUTININ                                                                                                                                                                                                                     | VIRAL PROTEIN                   |
| 1TID | CRYSTAL STRUCTURES OF THE ADP AND ATP BOUND FORMS OF THE BACILLUS ANTI-SIGMA FACTOR SPOIIAB IN COMPLEX WITH THE ANTI-ANTI-SIGMA SPOIIAA: POISED FOR PHOSPHORYLATION COMPLEX WITH ATP, CRYSTAL FORM I                                  | TRANSCRIPTION                   |
| 1TII | ESCHERICHIA COLI HEAT LABILE ENTEROTOXIN TYPE IIB                                                                                                                                                                                     | ENTEROTOXIN                     |
| 1TIL | CRYSTAL STRUCTURES OF THE ADP AND ATP BOUND FORMS OF THE BACILLUS ANTI-SIGMA FACTOR SPOIIAB IN COMPLEX WITH THE ANTI-ANTI-SIGMA SPOIIAA: POISED FOR PHOSPHORYLATION COMPLEX                                                           | TRANSCRIPTION                   |

## WITH ATP, CRYSTAL FORM II

|      |                                                                                                                                                                     |                                    |
|------|---------------------------------------------------------------------------------------------------------------------------------------------------------------------|------------------------------------|
| 1TJ9 | STRUCTURE OF THE COMPLEXED FORMED BETWEEN GROUP II PHOSPHOLIPASE A2 AND A RATIONALLY DESIGNED TETRA PEPTIDE, VAL-ALA-ARG-SER AT 1.1A RESOLUTION                     | HYDROLASE                          |
| 1TJG | CRYSTAL STRUCTURE OF THE BROADLY NEUTRALIZING ANTI-HIV-1 ANTIBODY 2F5 IN COMPLEX WITH A GP41 7MER EPITOPE                                                           | VIRAL PROTEIN/IMMUNE SYSTEM        |
| 1TJH | CRYSTAL STRUCTURE OF THE BROADLY NEUTRALIZING ANTI-HIV-1 ANTIBODY 2F5 IN COMPLEX WITH A GP41 11MER EPITOPE                                                          | VIRAL PROTEIN/IMMUNE SYSTEM        |
| 1TJI | CRYSTAL STRUCTURE OF THE BROADLY NEUTRALIZING ANTI-HIV-1 ANTIBODY 2F5 IN COMPLEX WITH A GP41 17MER EPITOPE                                                          | VIRAL PROTEIN/IMMUNE SYSTEM        |
| 1TJK | CRYSTAL STRUCTURE OF THE COMPLEX FORMED BETWEEN GROUP II PHOSPHOLIPASE A2 WITH A DESIGNED PENTAPEPTIDE, PHE- LEU-SER- THR- LYS AT 1.2 A RESOLUTION                  | HYDROLASE                          |
| 1TJP | CRYSTAL STRUCTURE OF WILD-TYPE TRYPTOPHAN SYNTHASE COMPLEXED WITH 1-[(2-HYDROXYLPHENYL)AMINO]3-GLYCEROLPHOSPHATE                                                    | LYASE                              |
| 1TJQ | CRYSTAL STRUCTURE OF THE COMPLEX FORMED BETWEEN A GROUP II PHOSPHOLIPASE A2 AND DESIGNED PEPTIDE INHIBITOR CARBOBENZOXY-DEHYDRO-VAL-ALA-ARG-SER AT 1.2 A RESOLUTION | HYDROLASE                          |
| 1TK0 | T7 DNA POLYMERASE TERNARY COMPLEX WITH 8 OXO GUANOSINE AND DDCTP AT THE INSERTION SITE                                                                              | TRANSFERASE/ELECTRON TRANSPORT/DNA |
| 1TK2 | CRYSTAL STRUCTURE OF THE COMPLEX FORMED BETWEEN ALKALINE PROTEINASE SAVINASE AND GRAMICIDIN S AT 1.5A RESOLUTION                                                    | HYDROLASE                          |
| 1TK4 | CRYSTAL STRUCTURE OF RUSSELLS VIPER PHOSPHOLIPASE A2 IN COMPLEX WITH A SPECIFICALLY DESIGNED TETRAPEPTIDE ALA-ILE-ARG-SER AT 1.1 A RESOLUTION                       | HYDROLASE                          |
| 1TK5 | T7 DNA POLYMERASE BINARY COMPLEX WITH 8 OXO GUANOSINE IN THE TEMPLATING STRAND                                                                                      | TRANSFERASE/ELECTRON TRANSPORT/DNA |
| 1TK8 | T7 DNA POLYMERASE TERNARY COMPLEX WITH 8 OXO GUANOSINE AND DAMP AT THE ELONGATION SITE                                                                              | TRANSFERASE/ELECTRON TRANSPORT/DNA |
| 1TKD | T7 DNA POLYMERASE TERNARY COMPLEX WITH 8 OXO GUANOSINE AND DCMP AT THE ELONGATION SITE                                                                              | TRANSFERASE/ELECTRON TRANSPORT/DNA |
| 1TKT | CRYSTAL STRUCTURE OF HIV-1 REVERSE TRANSCRIPTASE IN COMPLEX WITH GW426318                                                                                           | TRANSFERASE                        |
| 1TKX | CRYSTAL STRUCTURE OF HIV-1 REVERSE TRANSCRIPTASE IN COMPLEX WITH GW490745                                                                                           | TRANSFERASE                        |
| 1TKZ | CRYSTAL STRUCTURE OF HIV-1 REVERSE TRANSCRIPTASE IN COMPLEX WITH GW429576                                                                                           | TRANSFERASE                        |
| 1TL1 | CRYSTAL STRUCTURE OF HIV-1 REVERSE TRANSCRIPTASE IN COMPLEX WITH GW451211                                                                                           | TRANSFERASE                        |
| 1TL3 | CRYSTAL STRUCTURE OF HIV-1 REVERSE TRANSCRIPTASE IN COMPLEX WITH GW450557                                                                                           | TRANSFERASE                        |
| 1TL7 | COMPLEX OF GS- WITH THE CATALYTIC DOMAINS OF MAMMALIAN ADENYLYL CYCLASE: COMPLEX WITH 2'(3')-O-(N-METHYLANTHRANILOYL)-GUANOSINE 5'-TRIPHOSPHATE AND MN              | LYASE                              |

|      |                                                                                                                                                                     |                                    |
|------|---------------------------------------------------------------------------------------------------------------------------------------------------------------------|------------------------------------|
| 1TL9 | HIGH RESOLUTION CRYSTAL STRUCTURE OF CALPAIN I PROTEASE CORE IN COMPLEX WITH LEUPEPTIN                                                                              | HYDROLASE                          |
| 1TLP | CRYSTALLOGRAPHIC STRUCTURAL ANALYSIS OF PHOSPHORAMIDATES AS INHIBITORS AND TRANSITION-STATE ANALOGS OF THERMOLYSIN                                                  | HYDROLASE (METALLOPROTEINASE)      |
| 1TLX | THERMOLYSIN (NATIVE)                                                                                                                                                | HYDROLASE                          |
| 1TM1 | CRYSTAL STRUCTURE OF THE COMPLEX OF SUBTILISIN BPN' WITH CHYMOTRYPSIN INHIBITOR 2                                                                                   | HYDROLASE                          |
| 1TM3 | CRYSTAL STRUCTURE OF THE COMPLEX OF SUBTILISIN BPN' WITH CHYMOTRYPSIN INHIBITOR 2 M59K MUTANT                                                                       | HYDROLASE                          |
| 1TM4 | CRYSTAL STRUCTURE OF THE COMPLEX OF SUBTILISIN BPN' WITH CHYMOTRYPSIN INHIBITOR 2 M59G MUTANT                                                                       | HYDROLASE                          |
| 1TM5 | CRYSTAL STRUCTURE OF THE COMPLEX OF SUBTILISIN BPN' WITH CHYMOTRYPSIN INHIBITOR 2 M59A MUTANT                                                                       | HYDROLASE/HYDROLASE INHIBITOR      |
| 1TM7 | CRYSTAL STRUCTURE OF THE COMPLEX OF SUBTILISIN BPN' WITH CHYMOTRYPSIN INHIBITOR 2 M59Y MUTANT                                                                       | HYDROLASE                          |
| 1TMB | MOLECULAR BASIS FOR THE INHIBITION OF HUMAN ALPHA-THROMBIN BY THE MACROCYCLIC PEPTIDE CYCLOTHEONAMIDE A                                                             | HYDROLASE(SERINE PROTEINASE)       |
| 1TMC | THE THREE-DIMENSIONAL STRUCTURE OF A CLASS I MAJOR HISTOCOMPATIBILITY COMPLEX MOLECULE MISSING THE ALPHA3 DOMAIN OF THE HEAVY CHAIN                                 | HISTOCOMPATIBILITY ANTIGEN         |
| 1TMG | CRYSTAL STRUCTURE OF THE COMPLEX OF SUBTILISIN BPN' WITH CHYMOTRYPSIN INHIBITOR 2 M59F MUTANT                                                                       | HYDROLASE                          |
| 1TMN | BINDING OF N-CARBOXYMETHYL DIPEPTIDE INHIBITORS TO THERMOLYSIN DETERMINED BY X-RAY CRYSTALLOGRAPHY. A NOVEL CLASS OF TRANSITION-STATE ANALOGUES FOR ZINC PEPTIDASES | HYDROLASE (METALLOPROTEINASE)      |
| 1TMQ | STRUCTURE OF TENEBRIO MOLITOR LARVAL ALPHA-AMYLASE IN COMPLEX WITH RAGI BIFUNCTIONAL INHIBITOR                                                                      | HYDROLASE/HYDROLASE INHIBITOR      |
| 1TMT | CHANGES IN INTERACTIONS IN COMPLEXES OF HIRUDIN DERIVATIVES AND HUMAN ALPHA-THROMBIN DUE TO DIFFERENT CRYSTAL FORMS                                                 | COMPLEX(SERINE PROTEASE/INHIBITOR) |
| 1TMU | CHANGES IN INTERACTIONS IN COMPLEXES OF HIRUDIN DERIVATIVES AND HUMAN ALPHA-THROMBIN DUE TO DIFFERENT CRYSTAL FORMS                                                 | COMPLEX(SERINE PROTEASE/INHIBITOR) |
| 1TN6 | PROTEIN FARNESYLTRANSFERASE COMPLEXED WITH A RAP2A PEPTIDE SUBSTRATE AND A FPP ANALOG AT 1.8A RESOLUTION                                                            | TRANSFERASE                        |
| 1TN7 | PROTEIN FARNESYLTRANSFERASE COMPLEXED WITH A TC21 PEPTIDE SUBSTRATE AND A FPP ANALOG AT 2.3A RESOLUTION                                                             | TRANSFERASE                        |
| 1TN8 | PROTEIN FARNESYLTRANSFERASE COMPLEXED WITH A H-RAS PEPTIDE SUBSTRATE AND A FPP ANALOG AT 2.25A RESOLUTION                                                           | TRANSFERASE                        |
| 1TNB | RAI1 PROTEIN GERANYLGERANYLTRANSFERASE TYPE-I COMPLEXED WITH A GGPP ANALOG AND A SUBSTRATE KKSKTKCVIF PEPTIDE DERIVED FROM TC21                                     | TRANSFERASE                        |
| 1TNO | RAI1 PROTEIN GERANYLGERANYLTRANSFERASE TYPE-I COMPLEXED WITH A GGPP ANALOG AND A KKKSKTKCVIM PEPTIDE DERIVED FROM K-RAS4B                                           | TRANSFERASE                        |
| 1TNU | RAI1 PROTEIN GERANYLGERANYLTRANSFERASE TYPE-I COMPLEXED WITH A GGPP ANALOG AND A GCINCKVL PEPTIDE DERIVED FROM RHOB                                                 | TRANSFERASE                        |

|      |                                                                                                                                                               |                                   |
|------|---------------------------------------------------------------------------------------------------------------------------------------------------------------|-----------------------------------|
| 1TNY | λAT PROTEIN GERANYLGERANYLTRANSFERASE TYPE-I COMPLEXED WITH A GGPP ANALOG AND A FREKKFFCAIL PEPTIDE DERIVED FROM THE HETEROTRIMERIC G PROTEIN GAMMA-2 SUBUNIT | TRANSFERASE                       |
| 1TNZ | λAT PROTEIN GERANYLGERANYLTRANSFERASE TYPE-I COMPLEXED WITH A GGPP ANALOG AND A RRCVLL PEPTIDE DERIVED FROM CDC42 SPLICE ISOFORM-2                            | TRANSFERASE                       |
| 1TO1 | CRYSTAL STRUCTURE OF THE COMPLEX OF SUBTILISIN BPN' WITH CHYMOTRYPSIN INHIBITOR 2 Y61A MUTANT                                                                 | HYDROLASE                         |
| 1TO2 | CRYSTAL STRUCTURE OF THE COMPLEX OF SUBTILISIN BPN' WITH CHYMOTRYPSIN INHIBITOR 2 M59K, IN PH 9 CRYOSOAK                                                      | HYDROLASE                         |
| 1TO9 | CRYSTAL STRUCTURE OF THI-4 PROTEIN FROM BACILLUS SUBTILIS                                                                                                     | BIOSYNTHETIC PROTEIN              |
| 1TOC | STRUCTURE OF SERINE PROTEINASE                                                                                                                                | COMPLEX (HYDROLASE/INHIBITOR)     |
| 1TOM | ALPHA-THROMBIN COMPLEXED WITH HIRUGEN                                                                                                                         | COMPLEX (HYDROLASE/INHIBITOR)     |
| 1TP3 | PDZ3 DOMAIN OF PSD-95 PROTEIN COMPLEXED WITH KKETPV PEPTIDE LIGAND                                                                                            | PROTEIN BINDING                   |
| 1TP5 | CRYSTAL STRUCTURE OF PDZ3 DOMAIN OF PSD-95 PROTEIN COMPLEXED WITH A PEPTIDE LIGAND KKETWV                                                                     | PEPTIDE BINDING PROTEIN           |
| 1TPX | OVINE RECOMBINANT PRP(114-234), ARQ VARIANT IN COMPLEX WITH THE FAB OF THE VRQ14 ANTIBODY                                                                     | UNKNOWN FUNCTION                  |
| 1TQ0 | CRYSTAL STRUCTURE OF THE POTENT ANTICOAGULANT THROMBIN MUTANT W215A/E217A IN FREE FORM                                                                        | BLOOD CLOTTING                    |
| 1TQB | OVINE RECOMBINANT PRP(114-234), VRQ VARIANT IN COMPLEX WITH THE FAB OF THE VRQ14 ANTIBODY                                                                     | UNKNOWN FUNCTION/IMMUNE SYSTEM    |
| 1TQC | OVINE RECOMBINANT PRP(114-234), ARR VARIANT IN COMPLEX WITH THE VRQ14 FAB FRAGMENT (IGG2A)                                                                    | UNKNOWN FUNCTION/IMMUNE SYSTEM    |
| 1TQE | MECHANISM OF RECRUITMENT OF CLASS II HISTONE DEACETYLASES BY MYOCYTE ENHANCER FACTOR-2                                                                        | TRANSCRIPTION/PROTEIN BINDING/DNA |
| 1TQY | THE ACTINORHODIN KETOSYNTHASE/CHAIN LENGTH FACTOR                                                                                                             | TRANSFERASE                       |
| 1TRZ | CRYSTALLOGRAPHIC EVIDENCE FOR DUAL COORDINATION AROUND ZINC IN THE T3R3 HUMAN INSULIN HEXAMER                                                                 | HORMONE                           |
| 1TSQ | CRYSTAL STRUCTURE OF AP2V SUBSTRATE VARIANT OF NC-P1 DECAMER PEPTIDE IN COMPLEX WITH V82A/D25N HIV-1 PROTEASE MUTANT                                          | HYDROLASE/VIRAL PROTEIN           |
| 1TSU | CRYSTAL STRUCTURE OF DECAMER NCP1 SUBSTRATE PEPTIDE IN COMPLEX WITH WILD-TYPE D25N HIV-1 PROTEASE VARIANT                                                     | VIRAL PROTEIN/HYDROLASE           |
| 1TT5 | STRUCTURE OF APPBP1-UBA3-UBC12N26: A UNIQUE E1-E2 INTERACTION REQUIRED FOR OPTIMAL CONJUGATION OF THE UBIQUITIN-LIKE PROTEIN NEDD8                            | CELL CYCLE, LIGASE                |
| 1TTH | λSPARTATE TRANSCARBAMOYLASE CATALYTIC CHAIN MUTANT GLU50ALA COMPLEXED WITH N-(PHOSPHONACETYL-L-ASPARTATE) (PALA)                                              | HYDROLASE/HYDROLASE REGULATOR     |
| 1TTP | TRYPTOPHAN SYNTHASE (E.C.4.2.1.20) IN THE PRESENCE OF CESIUM, ROOM TEMPERATURE                                                                                | CARBON-OXYGEN LYASE               |
| 1TTQ | TRYPTOPHAN SYNTHASE (E.C.4.2.1.20) IN THE PRESENCE OF                                                                                                         | CARBON-OXYGEN LYASE               |

## POTASSIUM AT ROOM TEMPERATURE

|      |                                                                                                                                            |                                         |
|------|--------------------------------------------------------------------------------------------------------------------------------------------|-----------------------------------------|
| 1TTW | CRYSTAL STRUCTURE OF THE YERSINIA PESTIS TYPE III SECRETION CHAPERONE SYCH IN COMPLEX WITH A STABLE FRAGMENT OF YSCM2                      | CHAPERONE                               |
| 1TU0 | ASPARTATE TRANSCARBAMOYLASE CATALYTIC CHAIN MUTANT E50A COMPLEX WITH PHOSPHONOACETAMIDE                                                    | HYDROLASE/HYDROLASE REGULATOR           |
| 1TU3 | CRYSTAL STRUCTURE OF RAB5 COMPLEX WITH RABAPTIN5 C-TERMINAL DOMAIN                                                                         | PROTEIN TRANSPORT                       |
| 1TUB | TUBULIN ALPHA-BETA DIMER, ELECTRON DIFFRACTION                                                                                             | MICROTUBULES                            |
| 1TUE | THE X-RAY STRUCTURE OF THE PAPILLOMAVIRUS HELICASE IN COMPLEX WITH ITS MOLECULAR MATCHMAKER E2                                             | REPLICATION                             |
| 1TUG | ASPARTATE TRANSCARBAMOYLASE CATALYTIC CHAIN MUTANT E50A COMPLEX WITH PHOSPHONOACETAMIDE, MALONATE, AND CYTIDINE-5-PRIME-TRIPHOSPHATE (CTP) | HYDROLASE/HYDROLASE REGULATOR           |
| 1TV6 | HIV-1 REVERSE TRANSCRIPTASE COMPLEXED WITH CP-94,707                                                                                       | TRANSFERASE                             |
| 1TVB | CRYSTAL STRUCTURE OF MELANOMA ANTIGEN GP100(209-217) BOUND TO HUMAN CLASS I MHC HLA-A2                                                     | IMMUNE SYSTEM                           |
| 1TVH | CRYSTAL STRUCTURE OF MODIFIED MELANOMA ANTIGEN GP100(209-22M) BOUND TO HUMAN CLASS I MHC HLA-A2                                            | IMMUNE SYSTEM                           |
| 1TVK | THE BINDING MODE OF EPOTHILONE A ON A,B-TUBULIN BY ELECTRON CRYSTALLOGRAPHY                                                                | CELL CYCLE, STRUCTURAL PROTEIN          |
| 1TVR | HIV-1 RT/9-CL TIBO                                                                                                                         | ASPARTYL PROTEASE                       |
| 1TW6 | STRUCTURE OF AN ML-IAP/XIAP CHIMERA BOUND TO A 9MER PEPTIDE DERIVED FROM SMAC                                                              | INHIBITOR/APOPTOSIS                     |
| 1TWA | RNA POLYMERASE II COMPLEXED WITH ATP                                                                                                       | TRANSCRIPTION                           |
| 1TWC | RNA POLYMERASE II COMPLEXED WITH GTP                                                                                                       | TRANSCRIPTION                           |
| 1TWF | RNA POLYMERASE II COMPLEXED WITH UTP AT 2.3 A RESOLUTION                                                                                   | TRANSCRIPTION                           |
| 1TWG | RNA POLYMERASE II COMPLEXED WITH CTP                                                                                                       | TRANSCRIPTION                           |
| 1TWH | RNA POLYMERASE II COMPLEXED WITH 2'DATP                                                                                                    | TRANSCRIPTION                           |
| 1TWQ | CRYSTAL STRUCTURE OF THE C-TERMINAL PGN-BINDING DOMAIN OF HUMAN PGRP-IALPHA IN COMPLEX WITH PGN ANALOG MURAMYL TRIPEPTIDE                  | IMMUNE SYSTEM, MEMBRANE PROTEIN         |
| 1TWX | CRYSTAL STRUCTURE OF THE THROMBIN MUTANT D221A/D222K                                                                                       | HYDROLASE                               |
| 1TX4 | RHO/RHOGAP/GDP(DOT)ALF4 COMPLEX                                                                                                            | COMPLEX(GTPASE ACTIVATN/PROTO-ONCOGENE) |
| 1TX6 | TRYPSIN:BI COMPLEX                                                                                                                         | HYDROLASE/PROTEIN BINDING               |
| 1TXQ | CRYSTAL STRUCTURE OF THE EB1 C-TERMINAL DOMAIN COMPLEXED WITH THE CAP-GLY DOMAIN OF P150GLUED                                              | STRUCTURAL PROTEIN/PROTEIN BINDING      |
| 1TY4 | CRYSTAL STRUCTURE OF A CED-9/EGL-1 COMPLEX                                                                                                 | APOPTOSIS                               |
| 1TYE | STRUCTURAL BASIS FOR ALLOSTERY IN INTEGRINS AND BINDING OF LIGAND-MIMETIC THERAPEUTICS TO THE PLATELET RECEPTOR FOR FIBRINOGEN             | CELL ADHESION                           |

|      |                                                                                                                                                                                |                                       |
|------|--------------------------------------------------------------------------------------------------------------------------------------------------------------------------------|---------------------------------------|
| 1TYG | STRUCTURE OF THE THIAZOLE SYNTHASE/THIS COMPLEX                                                                                                                                | BIOSYNTHETIC PROTEIN                  |
| 1TYL | THE STRUCTURE OF A COMPLEX OF HEXAMERIC INSULIN AND 4-HYDROXYACETANILIDE                                                                                                       | HORMONE                               |
| 1TYQ | CRYSTAL STRUCTURE OF ARP2/3 COMPLEX WITH BOUND ATP AND CALCIUM                                                                                                                 | STRUCTURAL PROTEIN                    |
| 1TZE | SIGNAL TRANSDUCTION ADAPTOR GROWTH FACTOR, GRB2 SH2 DOMAIN COMPLEXED WITH PHOSPHOTYROSYL HEPTAPEPTIDE LYS-PRO-PHE-PTYR-VAL-ASN-VAL-NH <sub>2</sub> (KFPPYVNC-NH <sub>2</sub> ) | COMPLEX (SIGNAL TRANSDUCTION/PEPTIDE) |
| 1TZG | CRYSTAL STRUCTURE OF HIV-1 NEUTRALIZING HUMAN FAB 4E10 IN COMPLEX WITH A 13-RESIDUE PEPTIDE CONTAINING THE 4E10 EPITOPE ON GP41                                                | IMMUNE SYSTEM                         |
| 1TZH | CRYSTAL STRUCTURE OF THE FAB YADS1 COMPLEXED WITH H-VEGF                                                                                                                       | IMMUNE SYSTEM                         |
| 1TZI | CRYSTAL STRUCTURE OF THE FAB YADS2 COMPLEXED WITH H-VEGF                                                                                                                       | IMMUNE SYSTEM                         |
| 1TZY | CRYSTAL STRUCTURE OF THE CORE-HISTONE OCTAMER TO 1.90 ANGSTROM RESOLUTION                                                                                                      | DNA BINDING PROTEIN                   |
| 1U00 | HSCA SUBSTRATE BINDING DOMAIN COMPLEXED WITH THE ISCU RECOGNITION PEPTIDE ELPPVKIHC                                                                                            | CHAPERONE                             |
| 1U0N | THE TERNARY VON WILLEBRAND FACTOR A1-GLYCOPROTEIN IBALPHA-BOTROCETIN COMPLEX                                                                                                   | BLOOD CLOTTING                        |
| 1U0O | THE MOUSE VON WILLEBRAND FACTOR A1-BOTROCETIN COMPLEX                                                                                                                          | BLOOD CLOTTING                        |
| 1U0S | CHEMOTAXIS KINASE CHEA P2 DOMAIN IN COMPLEX WITH RESPONSE REGULATOR CHEY FROM THE THERMOPHILE THERMOTOGA MARITIMA                                                              | SIGNALING PROTEIN                     |
| 1U28 | R. RUBRUM TRANSHYDROGENASE ASYMMETRIC COMPLEX (DI.NAD <sup>+</sup> ) <sub>2</sub> (DIII.NADP <sup>+</sup> ) <sub>1</sub>                                                       | OXIDOREDUCTASE                        |
| 1U2D | STRUCTRE OF TRANSHYDROGENAES (DI.NADH) <sub>2</sub> (DIII.NADPH) <sub>1</sub> ASYMMETRIC COMPLEX                                                                               | OXIDOREDUCTASE                        |
| 1U2G | TRANSHYDROGENASE (DI.ADPR) <sub>2</sub> (DIII.NADPH) <sub>1</sub> ASYMMETRIC COMPLEX                                                                                           | OXIDOREDUCTASE                        |
| 1U2V | CRYSTAL STRUCTURE OF ARP2/3 COMPLEX WITH BOUND ADP AND CALCIUM                                                                                                                 | STRUCTURAL PROTEIN                    |
| 1U35 | CRYSTAL STRUCTURE OF THE NUCLEOSOME CORE PARTICLE CONTAINING THE HISTONE DOMAIN OF MACROH2A                                                                                    | STRUCTURAL PROTEIN/DNA                |
| 1U3H | CRYSTAL STRUCTURE OF MOUSE TCR 172.10 COMPLEXED WITH MHC CLASS II I-AU MOLECULE AT 2.4 Å                                                                                       | IMMUNE SYSTEM                         |
| 1U3R | CRYSTAL STRUCTURE OF ESTROGEN RECEPTOR BETA COMPLEXED WITH WAY-338                                                                                                             | TRANSCRIPTION                         |
| 1U3S | CRYSTAL STRUCTURE OF ESTROGEN RECEPTOR BETA COMPLEXED WITH WAY-797                                                                                                             | TRANSCRIPTION                         |
| 1U54 | CRYSTAL STRUCTURES OF THE PHOSPHORYLATED AND UNPHOSPHORYLATED KINASE DOMAINS OF THE CDC42-ASSOCIATED TYROSINE KINASE ACK1 BOUND TO AMP-PCP                                     | TRANSFERASE                           |
| 1U5B | CRYSTAL STRUCTURE OF THE HUMAN MITOCHONDRIAL BRANCHED-CHAIN ALPHA-KETOACID DEHYDROGENASE                                                                                       | OXIDOREDUCTASE                        |
| 1U5I | CRYSTAL STRUCTURE ANALYSIS OF RAT M-CALPAIN MUTANT LYS10 THR                                                                                                                   | HYDROLASE                             |

|      |                                                                                                                   |                   |
|------|-------------------------------------------------------------------------------------------------------------------|-------------------|
| 1U5T | STRUCTURE OF THE ESCRT-II ENDOSOMAL TRAFFICKING COMPLEX                                                           | TRANSPORT PROTEIN |
| 1U6A | CRYSTAL STRUCTURE OF THE BROADLY NEUTRALIZING ANTI-HIV FAB F105                                                   | IMMUNE SYSTEM     |
| 1U6G | CRYSTAL STRUCTURE OF THE CAND1-CUL1-ROC1 COMPLEX                                                                  | LIGASE            |
| 1U6H | VINCULIN HEAD (0-258) IN COMPLEX WITH THE TALIN VINCULIN BINDING SITE 2 (849-879)                                 | CELL ADHESION     |
| 1U74 | ELECTRON TRANSFER COMPLEX BETWEEN CYTOCHROME C AND CYTOCHROME C PEROXIDASE                                        | OXIDOREDUCTASE    |
| 1U75 | ELECTRON TRANSFER COMPLEX BETWEEN HORSE HEART CYTOCHROME C AND ZINC-PORPHYRIN SUBSTITUTED CYTOCHROME C PEROXIDASE | OXIDOREDUCTASE    |
| 1U76 | CRYSTAL STRUCTURE OF HPCNA BOUND TO RESIDUES 452-466 OF THE DNA POLYMERASE-DELTA-P66 SUBUNIT                      | REPLICATION       |
| 1U7B | CRYSTAL STRUCTURE OF HPCNA BOUND TO RESIDUES 331-350 OF THE FLAP ENDONUCLEASE-1 (FEN1)                            | REPLICATION       |
| 1U7E | THE CRYSTAL STRUCTURE OF A PROTEIN KINASE A COMPLEX                                                               | TRANSFERASE       |
| 1U7F | CRYSTAL STRUCTURE OF THE PHOSPHORYLATED SMAD3/SMAD4 HETEROTRIMERIC COMPLEX                                        | SIGNALING PROTEIN |
| 1U7V | CRYSTAL STRUCTURE OF THE PHOSPHORYLATED SMAD2/SMAD4 HETEROTRIMERIC COMPLEX                                        | SIGNALING PROTEIN |
| 1U8C | A NOVEL ADAPTATION OF THE INTEGRIN PSI DOMAIN REVEALED FROM ITS CRYSTAL STRUCTURE                                 | CELL ADHESION     |
| 1U8G | CRYSTAL STRUCTURE OF A HIV-1 PROTEASE IN COMPLEX WITH PEPTIDOMIMETIC INHIBITOR KI2-PHE-GLU-GLU-NH2                | HYDROLASE         |
| 1U8H | CRYSTAL STRUCTURE OF THE HIV-1 CROSS NEUTRALIZING MONOCLONAL ANTIBODY 2F5 IN COMPLEX WITH GP41 PEPTIDE ALDKWAS    | IMMUNE SYSTEM     |
| 1U8I | CRYSTAL STRUCTURE OF THE HIV-1 CROSS NEUTRALIZING MONOCLONAL ANTIBODY 2F5 IN COMPLEX WITH GP41 PEPTIDE ELDKWAN    | IMMUNE SYSTEM     |
| 1U8J | CRYSTAL STRUCTURE OF THE HIV-1 CROSS NEUTRALIZING MONOCLONAL ANTIBODY 2F5 IN COMPLEX WITH GP41 PEPTIDE ELDKWAG    | IMMUNE SYSTEM     |
| 1U8K | CRYSTAL STRUCTURE OF THE HIV-1 CROSS NEUTRALIZING MONOCLONAL ANTIBODY 2F5 IN COMPLEX WITH GP41 PEPTIDE LECLKWASL  | IMMUNE SYSTEM     |
| 1U8L | CRYSTAL STRUCTURE OF THE HIV-1 CROSS NEUTRALIZING MONOCLONAL ANTIBODY 2F5 IN COMPLEX WITH GP41 PEPTIDE DLDRWAS    | IMMUNE SYSTEM     |
| 1U8M | CRYSTAL STRUCTURE OF THE HIV-1 CROSS NEUTRALIZING MONOCLONAL ANTIBODY 2F5 IN COMPLEX WITH GP41 PEPTIDE ELDKYAS    | IMMUNE SYSTEM     |
| 1U8N | CRYSTAL STRUCTURE OF THE HIV-1 CROSS NEUTRALIZING MONOCLONAL ANTIBODY 2F5 IN COMPLEX WITH GP41 PEPTIDE ELDKFAS    | IMMUNE SYSTEM     |

|      |                                                                                                                                      |                         |
|------|--------------------------------------------------------------------------------------------------------------------------------------|-------------------------|
| 1U8O | CRYSTAL STRUCTURE OF THE HIV-1 CROSS NEUTRALIZING MONOCLONAL ANTIBODY 2F5 IN COMPLEX WITH GP41 PEPTIDE ELDKHAS                       | IMMUNE SYSTEM           |
| 1U8P | CRYSTAL STRUCTURE OF THE HIV-1 CROSS NEUTRALIZING MONOCLONAL ANTIBODY 2F5 IN COMPLEX WITH GP41 PEPTIDE ECDKWCS                       | IMMUNE SYSTEM           |
| 1U8Q | CRYSTAL STRUCTURE OF THE HIV-1 CROSS NEUTRALIZING MONOCLONAL ANTIBODY 2F5 IN COMPLEX WITH GP41 PEPTIDE ELEKWS                        | IMMUNE SYSTEM           |
| 1U8T | CRYSTAL STRUCTURE OF CHEY D13K Y106W ALONE AND IN COMPLEX WITH A FLIM PEPTIDE                                                        | SIGNALING PROTEIN       |
| 1U91 | CRYSTAL STRUCTURE OF THE HIV-1 CROSS NEUTRALIZING MONOCLONAL ANTIBODY 2F5 IN COMPLEX WITH GP41 PEPTIDE ANALOG ENDKW-[DAP]-S (CYCLIC) | IMMUNE SYSTEM           |
| 1U92 | CRYSTAL STRUCTURE OF THE HIV-1 CROSS NEUTRALIZING MONOCLONAL ANTIBODY 2F5 IN COMPLEX WITH GP41 PEPTIDE ANALOG E-[DAP]-DKWQS (CYCLIC) | IMMUNE SYSTEM           |
| 1U93 | CRYSTAL STRUCTURE OF THE HIV-1 CROSS NEUTRALIZING MONOCLONAL ANTIBODY 2F5 IN COMPLEX WITH GP41 PEPTIDE ANALOG EQDKW-[DAP]-S (CYCLIC) | IMMUNE SYSTEM           |
| 1U95 | CRYSTAL STRUCTURE OF THE HIV-1 CROSS NEUTRALIZING MONOCLONAL ANTIBODY 2F5 IN COMPLEX WITH GP41 PEPTIDE ELDHWS                        | IMMUNE SYSTEM           |
| 1U9E | CRYSTAL STRUCTURE OF ESTROGEN RECEPTOR BETA COMPLEXED WITH WAY-397                                                                   | TRANSCRIPTION           |
| 1U9I | CRYSTAL STRUCTURE OF CIRCADIAN CLOCK PROTEIN KAIC WITH PHOSPHORYLATION SITES                                                         | CIRCADIAN CLOCK PROTEIN |
| 1U9L | STRUCTURAL BASIS FOR A NUSA- PROTEIN N INTERACTION                                                                                   | RNA BINDING PROTEIN     |
| 1UA6 | CRYSTAL STRUCTURE OF HYHEL-10 FV MUTANT SFSF COMPLEXED WITH HEN EGG WHITE LYSOZYME COMPLEX                                           | IMMUNE SYSTEM/HYDROLASE |
| 1UAD | CRYSTAL STRUCTURE OF THE RALA-GPPNHP-SEC5 RAL-BINDING DOMAIN COMPLEX                                                                 | ENDOCYTOSIS/EXOCYTOSIS  |
| 1UB4 | CRYSTAL STRUCTURE OF MAZEF COMPLEX                                                                                                   | DNA BINDING PROTEIN     |
| 1UB5 | CRYSTAL STRUCTURE OF ANTIBODY 19G2 WITH HAPTEN AT 100K                                                                               | IMMUNE SYSTEM           |
| 1UB6 | CRYSTAL STRUCTURE OF ANTIBODY 19G2 WITH SERA LIGAND                                                                                  | IMMUNE SYSTEM           |
| 1UBH | THREE-DIMENSIONAL STRUCTURE OF THE CARBON MONOXIDE COMPLEX OF [NIFE]HYDROGENASE FROM DESULFOVIBRIO VULGARIS MIYAZAKI F               | OXIDOREDUCTASE          |
| 1UBJ | THREE-DIMENSIONAL STRUCTURE OF THE CARBON MONOXIDE COMPLEX OF [NIFE]HYDROGENASE FROM DESULFOVIBRIO VULGARIS MIYAZAKI F               | OXIDOREDUCTASE          |
| 1UBK | THREE-DIMENSIONAL STRUCTURE OF THE CARBON MONOXIDE COMPLEX OF [NIFE]HYDROGENASE FROM DESULFOVIBRIO VULGARIS MIYAZAKI F               | OXIDOREDUCTASE          |
| 1UBL | THREE-DIMENSIONAL STRUCTURE OF THE CARBON MONOXIDE COMPLEX OF [NIFE]HYDROGENASE FROM DESULFOVIBRIO VULGARIS MIYAZAKI                 | OXIDOREDUCTASE          |



| F    |                                                                                                                                        |                                       |
|------|----------------------------------------------------------------------------------------------------------------------------------------|---------------------------------------|
| 1UBM | THREE-DIMENSIONAL STRUCTURE OF THE CARBON MONOXIDE COMPLEX OF [NIFE]HYDROGENASE FROM DESULUFOVIBRIO VULGARIS MIYAZAKI<br>F             | OXIDOREDUCTASE                        |
| 1UBO | THREE-DIMENSIONAL STRUCTURE OF THE CARBON MONOXIDE COMPLEX OF [NIFE]HYDROGENASE FROM DESULUFOVIBRIO VULGARIS MIYAZAKI<br>F             | OXIDOREDUCTASE                        |
| 1UBP | CRYSTAL STRUCTURE OF UREASE FROM BACILLUS PASTEURII INHIBITED WITH BETA-MERCAPTOETHANOL AT 1.65 ANGSTROMS RESOLUTION                   | HYDROLASE                             |
| 1UBR | THREE-DIMENSIONAL STRUCTURE OF THE CARBON MONOXIDE COMPLEX OF [NIFE]HYDROGENASE FROM DESULUFOVIBRIO VULGARIS MIYAZAKI<br>F             | OXIDOREDUCTASE                        |
| 1UBS | TRYPTOPHAN SYNTHASE (E.C.4.2.1.20) WITH A MUTATION OF LYS 87->THR IN THE B SUBUNIT AND IN THE PRESENCE OF LIGAND L-SERINE              | COMPLEX (LYASE/PEPTIDE)               |
| 1UBT | THREE-DIMENSIONAL STRUCTURE OF THE CARBON MONOXIDE COMPLEX OF [NIFE]HYDROGENASE FROM DESULUFOVIBRIO VULGARIS MIYAZAKI<br>F             | OXIDOREDUCTASE                        |
| 1UBU | THREE-DIMENSIONAL STRUCTURE OF THE CARBON MONOXIDE COMPLEX OF [NIFE]HYDROGENASE FROM DESULUFOVIBRIO VULGARIS MIYAZAKI<br>F             | OXIDOREDUCTASE                        |
| 1UC4 | STRUCTURE OF DIOL DEHYDRATASE COMPLEXED WITH (S)-1,2-PROPANEDIOL                                                                       | LYASE                                 |
| 1UC5 | STRUCTURE OF DIOL DEHYDRATASE COMPLEXED WITH (R)-1,2-PROPANEDIOL                                                                       | LYASE                                 |
| 1UCB | STRUCTURE OF UNCOMPLEXED FAB COMPARED TO COMPLEX (1CLY, 1CLZ)                                                                          | IMMUNOGLOBULIN                        |
| 1UCY | THROMBIN COMPLEXED WITH FIBRINOPEPTIDE A ALPHA (RESIDUES 7-19). THREE COMPLEXES, ONE WITH EPSILON-THROMBIN AND TWO WITH ALPHA-THROMBIN | COMPLEX (SERINE PROTEASE/COAGULATION) |
| 1UDI | NUCLEOTIDE MIMICRY IN THE CRYSTAL STRUCTURE OF THE URACIL-DNA GLYCOSYLASE-URACIL GLYCOSYLASE INHIBITOR PROTEIN COMPLEX                 | COMPLEX (HYDROLASE/INHIBITOR)         |
| 1UEA | MMP-3/TIMP-1 COMPLEX                                                                                                                   | COMPLEX (METALLOPROTEASE/INHIBITOR)   |
| 1UEF | CRYSTAL STRUCTURE OF DOK1 PTB DOMAIN COMPLEX                                                                                           | PROTEIN BINDING/TRANSFERASE           |
| 1UEX | CRYSTAL STRUCTURE OF VON WILLEBRAND FACTOR A1 DOMAIN COMPLEXED WITH SNAKE VENOM BITISCETIN                                             | TOXIN/BLOOD CLOTTING                  |
| 1UF2 | THE ATOMIC STRUCTURE OF RICE DWARF VIRUS (RDV)                                                                                         | VIRUS                                 |
| 1UGH | CRYSTAL STRUCTURE OF HUMAN URACIL-DNA GLYCOSYLASE IN COMPLEX WITH A PROTEIN INHIBITOR: PROTEIN MIMICRY OF DNA                          | GLYCOSYLASE                           |
| 1UGP | CRYSTAL STRUCTURE OF CO-TYPE NITRILE HYDRATASE COMPLEXED WITH N-BUTYRIC ACID                                                           | LYASE                                 |
| 1UGQ | CRYSTAL STRUCTURE OF APOENZYME OF CO-TYPE NITRILE HYDRATASE                                                                            | LYASE                                 |
| 1UGR | CRYSTAL STRUCTURE OF AT109S MUTANT OF CO-TYPE NITRILE                                                                                  | LYASE                                 |

## HYDRATASE

|      |                                                                                                                                             |                                       |
|------|---------------------------------------------------------------------------------------------------------------------------------------------|---------------------------------------|
| 1UGS | CRYSTAL STRUCTURE OF AY114T MUTANT OF CO-TYPE NITRILE HYDRATASE                                                                             | LYASE                                 |
| 1UHB | CRYSTAL STRUCTURE OF PORCINE ALPHA TRYPSIN BOUND WITH AUTO CATALYTICALLY PRODUCED NATIVE PEPTIDE AT 2.15 Å RESOLUTION                       | HYDROLASE                             |
| 1UHD | CRYSTAL STRUCTURE OF ASPARTATE DECARBOXYLASE, PYRUVOLY GROUP BOUND FORM                                                                     | LYASE                                 |
| 1UHE | CRYSTAL STRUCTURE OF ASPARTATE DECARBOXYLASE, ISOASPARGINE COMPLEX                                                                          | LYASE                                 |
| 1UHL | CRYSTAL STRUCTURE OF THE LXRALFA-RXRβ LBD HETERODIMER                                                                                       | DNA BINDING PROTEIN                   |
| 1UIW | CRYSTAL STRUCTURES OF UNLIGANDED AND HALF-LIGANDED HUMAN HEMOGLOBIN DERIVATIVES CROSS-LINKED BETWEEN LYS 82β1 AND LYS 82β2                  | OXYGEN STORAGE/TRANSPORT              |
| 1UJ3 | CRYSTAL STRUCTURE OF A HUMANIZED FAB FRAGMENT OF ANTI-TISSUE-FACTOR ANTIBODY IN COMPLEX WITH TISSUE FACTOR                                  | IMMUNE SYSTEM/BLOOD CLOTTING          |
| 1UJJ | VHS DOMAIN OF HUMAN GGA1 COMPLEXED WITH C-TERMINAL PEPTIDE FROM BACE                                                                        | PROTEIN TRANSPORT/HYDROLASE           |
| 1UJK | VHS DOMAIN OF HUMAN GGA1 COMPLEXED WITH C-TERMINAL PHOSHOPEPTIDE FROM BACE                                                                  | PROTEIN TRANSPORT/HYDROLASE           |
| 1UJW | STRUCTURE OF THE COMPLEX BETWEEN BTUB AND COLICIN E3 RECEPTOR BINDING DOMAIN                                                                | TRANSPORT PROTEIN/HYDROLASE           |
| 1UJZ | CRYSTAL STRUCTURE OF THE E7_C/IM7_C COMPLEX; A COMPUTATIONALLY DESIGNED INTERFACE BETWEEN THE COLICIN E7 DNASE AND THE IM7 IMMUNITY PROTEIN | IMMUNE SYSTEM                         |
| 1UK4 | CRYSTAL STRUCTURE OF SARS CORONAVIRUS MAIN PROTEINASE (3CLPRO) COMPLEXED WITH AN INHIBITOR                                                  | HYDROLASE                             |
| 1UKH | STRUCTURAL BASIS FOR THE SELECTIVE INHIBITION OF JNK1 BY THE SCAFFOLDING PROTEIN JIP1 AND SP600125                                          | TRANSFERASE                           |
| 1UKI | STRUCTURAL BASIS FOR THE SELECTIVE INHIBITION OF JNK1 BY THE SCAFFOLDING PROTEIN JIP1 AND SP600125                                          | TRANSFERASE                           |
| 1UKL | CRYSTAL STRUCTURE OF IMPORTIN-β AND SREBP-2 COMPLEX                                                                                         | PROTEIN TRANSPORT/DNA BINDING PROTEIN |
| 1UKM | CRYSTAL STRUCTURE OF EMS16, AN ANTAGONIST OF COLLAGEN RECEPTOR INTEGRIN α2β1 (GPIIb/IIIa)                                                   | TOXIN                                 |
| 1UKV | STRUCTURE OF RABGDP-DISSOCIATION INHIBITOR IN COMPLEX WITH PRENYLATED YPT1 GTPASE                                                           | PROTEIN TRANSPORT                     |
| 1UL1 | CRYSTAL STRUCTURE OF THE HUMAN FEN1-PCNA COMPLEX                                                                                            | HYDROLASE/DNA BINDING PROTEIN         |
| 1ULI | BIPHENYL DIOXYGENASE (BPHA1A2) DERIVED FROM RHODOCOCCLUS SP. STRAIN RHA1                                                                    | OXIDOREDUCTASE                        |
| 1ULJ | BIPHENYL DIOXYGENASE (BPHA1A2) IN COMPLEX WITH THE SUBSTRATE                                                                                | OXIDOREDUCTASE                        |
| 1UM2 | CRYSTAL STRUCTURE OF THE VMA1-DERIVED ENDONUCLEASE WITH THE LIGATED EXTEIN SEGMENT                                                          | HYDROLASE                             |
| 1UM4 | CATALYTIC ANTIBODY 21H3 WITH HAPTEN                                                                                                         | IMMUNE SYSTEM                         |

|      |                                                                                                                                               |                                |
|------|-----------------------------------------------------------------------------------------------------------------------------------------------|--------------------------------|
| 1UM5 | CATALYTIC ANTIBODY 21H3 WITH ALCOHOL SUBSTRATE                                                                                                | IMMUNE SYSTEM                  |
| 1UM6 | CATALYTIC ANTIBODY 21H3                                                                                                                       | IMMUNE SYSTEM                  |
| 1UM9 | BRANCHED-CHAIN 2-OXO ACID DEHYDROGENASE (E1) FROM THERMUS THERMOPHILUS HB8 IN APO-FORM                                                        | OXIDOREDUCTASE                 |
| 1UMB | BRANCHED-CHAIN 2-OXO ACID DEHYDROGENASE (E1) FROM THERMUS THERMOPHILUS HB8 IN HOLO-FORM                                                       | OXIDOREDUCTASE                 |
| 1UMC | BRANCHED-CHAIN 2-OXO ACID DEHYDROGENASE (E1) FROM THERMUS THERMOPHILUS HB8 WITH 4-METHYLPENTANOATE                                            | OXIDOREDUCTASE                 |
| 1UMD | BRANCHED-CHAIN 2-OXO ACID DEHYDROGENASE (E1) FROM THERMUS THERMOPHILUS HB8 WITH 4-METHYL-2-OXOPENTANOATE AS AN INTERMEDIATE                   | OXIDOREDUCTASE                 |
| 1UMR | CRYSTAL STRUCTURE OF THE PLATELET ACTIVATOR CONVULXIN, A DISULFIDE LINKED A4B4 CYCLIC TETRAMER FROM THE VENOM OF CROTALUS DURISSUS TERRIFICUS | LECTIN                         |
| 1UMW | STRUCTURE OF A HUMAN PLK1 POLO-BOX DOMAIN/PHOSPHOPEPTIDE COMPLEX                                                                              | KINASE                         |
| 1UMX | PHOTOSYNTHETIC REACTION CENTER MUTANT WITH ARG M267 REPLACED WITH LEU (CHAIN M, R267L)                                                        | PHOTOSYNTHETIC REACTION CENTER |
| 1UN0 | CRYSTAL STRUCTURE OF YEAST KARYOPHERIN (IMPORTIN) ALPHA IN COMPLEX WITH A NUP2P N-TERMINAL FRAGMENT                                           | NUCLEAR IMPORT                 |
| 1UNN | COMPLEX OF BETA-CLAMP PROCESSIVITY FACTOR AND LITTLE FINGER DOMAIN OF POLIV                                                                   | BETA-CLAMP                     |
| 1UOO | PROLYL OLIGOPEPTIDASE FROM PORCINE BRAIN, S554A MUTANT WITH BOUND PEPTIDE LIGAND GLY-PHE-ARG-PRO                                              | HYDROLASE                      |
| 1UOP | PROLYL OLIGOPEPTIDASE FROM PORCINE BRAIN, S554A MUTANT WITH BOUND PEPTIDE LIGAND GLY-PHE-GLU-PRO                                              | HYDROLASE                      |
| 1UOQ | PROLYL OLIGOPEPTIDASE FROM PORCINE BRAIN, S554A MUTANT WITH BOUND PEPTIDE LIGAND GLU-PHE-SER-PRO                                              | HYDROLASE                      |
| 1UOS | THE CRYSTAL STRUCTURE OF THE SNAKE VENOM TOXIN CONVULXIN                                                                                      | LECTIN                         |
| 1UPK | CRYSTAL STRUCTURE OF MO25 IN COMPLEX WITH A C-TERMINAL PEPTIDE OF STRAD                                                                       | TRANSFERASE                    |
| 1UPM | ACTIVATED SPINACH RUBISCO COMPLEXED WITH 2-CARBOXYARABINITOL 2 BISPHOSPHAT AND CA <sup>2+</sup> .                                             | LYASE                          |
| 1UPN | COMPLEX OF ECHOVIRUS TYPE 12 WITH DOMAINS 3 AND 4 OF ITS RECEPTOR DECAY ACCELERATING FACTOR (CD55) BY CRYO ELECTRON MICROSCOPY AT 16 Å        | VIRUS/RECEPTOR                 |
| 1UPP | SPINACH RUBISCO IN COMPLEX WITH 2-CARBOXYARABINITOL 2 BISPHOSPHATE AND CALCIUM.                                                               | LYASE                          |
| 1UPT | STRUCTURE OF A COMPLEX OF THE GOLGIN-245 GRIP DOMAIN WITH ARL1                                                                                | COMPLEX (GTPASE/GOLGIN)        |
| 1URC | CYCLIN A BINDING GROOVE INHIBITOR ACE-ARG-LYS-LEU-PHE-GLY                                                                                     | KINASE                         |
| 1URQ | CRYSTAL STRUCTURE OF NEURONAL Q-SNARES IN COMPLEX WITH R-SNARE MOTIF OF TOMOSYN                                                               | TRANSPORT PROTEIN              |

|       |                                                                                                                   |                            |
|-------|-------------------------------------------------------------------------------------------------------------------|----------------------------|
| 1US8  | THE RAD50 SIGNATURE MOTIF: ESSENTIAL TO ATP BINDING AND BIOLOGICAL FUNCTION                                       | DNA REPAIR                 |
| 1USP  | ORGANIC HYDROPEROXIDE RESISTANCE PROTEIN FROM DEINOCOCCUS RADIODURANS                                             | OXIDOREDUCTASE             |
| 1USU  | THE STRUCTURE OF THE COMPLEX BETWEEN AHA1 AND HSP90                                                               | CHAPERONE/COMPLEX          |
| 1USV  | THE STRUCTURE OF THE COMPLEX BETWEEN AHA1 AND HSP90                                                               | CHAPERONE/COMPLEX          |
| 1USY  | ATP PHOSPHORIBOSYL TRANSFERASE (HISG:HISZ) COMPLEX FROM THERMOTOGA MARITIMA                                       | TRANSFERASE                |
| 1UTB  | DNTR FROM BURKHOLDERIA SP. STRAIN DNT                                                                             | TRANSCRIPTION REGULATION   |
| 1UTH  | DNTR FROM BURKHOLDERIA SP. STRAIN DNT IN COMPLEX WITH THIOCYANATE                                                 | TRANSCRIPTION REGULATION   |
| 1UUG  | ESCHERICHIA COLI URACIL-DNA GLYCOSYLASE:INHIBITOR COMPLEX WITH WILD-TYPE UDG AND WILD-TYPE UGI                    | REPLICATION, HYDROLASE     |
| 1UUV  | NAPHTHALENE 1,2-DIOXYGENASE WITH NITRIC OXIDE AND INDOLE BOUND IN THE ACTIVE SITE.                                | OXIDOREDUCTASE             |
| 1U UW | NAPHTHALENE 1,2-DIOXYGENASE WITH NITRIC OXIDE BOUND IN THE ACTIVE SITE.                                           | OXIDOREDUCTASE             |
| 1UUZ  | IVY:A NEW FAMILY OF PROTEIN                                                                                       | LYSOZYME/INHIBITOR COMPLEX |
| 1UVQ  | CRYSTAL STRUCTURE OF HLA-DQ0602 IN COMPLEX WITH A HYPOCRETIN PEPTIDE                                              | IMMUNOLOGY                 |
| 1UVS  | BOVINE THROMBIN--BM51.1011 COMPLEX                                                                                | SERINE PROTEASE            |
| 1UVT  | BOVINE THROMBIN--BM14.1248 COMPLEX                                                                                | SERINE PROTEASE            |
| 1UVU  | BOVINE THROMBIN--BM12.1700 COMPLEX                                                                                | SERINE PROTEASE            |
| 1UW4  | THE STRUCTURAL BASIS OF THE INTERACTION BETWEEN NONSENSE MEDIATED DECAY FACTORS UPF2 AND UPF3                     | RNA-BINDING PROTEIN        |
| 1UW9  | L290F-A222T CHLAMYDOMONAS RUBISCO MUTANT                                                                          | LYASE                      |
| 1UWA  | L290F MUTANT RUBISCO FROM CHLAMYDOMONAS                                                                           | LYASE                      |
| 1UWB  | TYR 181 CYS HIV-1 RT/8-CL TIBO                                                                                    | ASPARTYL PROTEASE          |
| 1UWE  | MOLECULAR MECHANISM OF ENANTIOSELECTIVE PROTON TRANSFER TO CARBON IN CATALYTIC ANTIBODY 14D9                      | ANTIBODY                   |
| 1UWX  | P1.2 SEROSUBTYPE ANTIGEN DERIVED FROM N. MENINGITIDIS PORA IN COMPLEX WITH FAB FRAGMENT                           | ANTIBODY/COMPLEX           |
| 1UXS  | CRYSTAL STRUCTURE OF HLA-B*2705 COMPLEXED WITH THE LATENT MEMBRANE PROTEIN 2 PEPTIDE (LMP2)OF EPSTEIN-BARR VIRUS  | COMPLEX (HLA/PEPTIDE)      |
| 1UXW  | CRYSTAL STRUCTURE OF HLA-B*2709 COMPLEXED WITH THE LATENT MEMBRANE PROTEIN 2 PEPTIDE (LMP2) OF EPSTEIN-BARR VIRUS | COMPLEX (ANTIGEN/PEPTIDE)  |
| 1UYW  | CRYSTAL STRUCTURE OF THE ANTIFLAVIVIRUS FAB4G2                                                                    | IMMUNE SYSTEM              |
| 1UZ6  | ANTI-LEWIS X FAB FRAGMENT UNCOMPLEXED                                                                             | ANTIBODY/COMPLEX           |
| 1UZ8  | ANTI-LEWIS X FAB FRAGMENT IN COMPLEX WITH LEWIS X                                                                 | ANTIBODY/COMPLEX           |

|      |                                                                                                                                                                    |                           |
|------|--------------------------------------------------------------------------------------------------------------------------------------------------------------------|---------------------------|
| 1UZ9 | CRYSTALLOGRAPHIC AND SOLUTION STUDIES OF N-LITHOCHOLYL INSULIN: A NEW GENERATION OF PROLONGED-ACTING INSULINS.                                                     | INSULIN                   |
| 1UZD | CHLAMYDOMONAS, SPINACH CHIMERIC RUBISCO                                                                                                                            | LYASE                     |
| 1UZH | A CHIMERIC CHLAMYDOMONAS, SYNECHOCOCCUS RUBISCO ENZYME                                                                                                             | LYASE                     |
| 1V02 | CRYSTAL STRUCTURE OF THE SORGHUM BICOLOR DHURRINASE 1                                                                                                              | HYDROLASE                 |
| 1V11 | CROSSTALK BETWEEN COFACTOR BINDING AND THE PHOSPHORYLATION LOOP CONFORMATION IN THE BCKD MACHINE                                                                   | OXIDOREDUCTASE            |
| 1V16 | CROSSTALK BETWEEN COFACTOR BINDING AND THE PHOSPHORYLATION LOOP CONFORMATION IN THE BCKD MACHINE                                                                   | OXIDOREDUCTASE            |
| 1V18 | THE CRYSTAL STRUCTURE OF BETA-CATENIN ARMADILLO REPEAT COMPLEXED WITH A PHOSPHORYLATED APC 20MER REPEAT.                                                           | SIGNALLING COMPLEX        |
| 1V1M | CROSSTALK BETWEEN COFACTOR BINDING AND THE PHOSPHORYLATION LOOP CONFORMATION IN THE BCKD MACHINE                                                                   | OXIDOREDUCTASE            |
| 1V1R | CROSSTALK BETWEEN COFACTOR BINDING AND THE PHOSPHORYLATION LOOP CONFORMATION IN THE BCKD MACHINE                                                                   | OXIDOREDUCTASE            |
| 1V1T | CRYSTAL STRUCTURE OF THE PDZ TANDEM OF HUMAN SYNTENIN IN COMPLEX WITH TNEYKV PEPTIDE                                                                               | ADHESION/COMPLEX          |
| 1V29 | CRYSTAL STRUCTURE OF NITRILE HYDRATASE FROM A THERMOPHILE BACILLUS SMITHII                                                                                         | LYASE                     |
| 1V3X | FACTOR XA IN COMPLEX WITH THE INHIBITOR 1-[6-METHYL-4,5,6,7-TETRAHYDROTHIAZOLO(5,4-C)PYRIDIN-2-YL] CARBONYL-2-CARBAMOYL-4-(6-CHLORONAPHTH-2-YLSULPHONYL)PIPERAZINE | HYDROLASE                 |
| 1V4L | CRYSTAL STRUCTURE OF A PLATELET AGGLUTINATION FACTOR ISOLATED FROM THE VENOM OF TAIWAN HABU (TRIMERESURUS MUCROSQUAMATUS)                                          | BLOOD CLOTTING            |
| 1V4U | CRYSTAL STRUCTURE OF BLUEFIN TUNA CARBONMONOXY-HEMOGLOBIN                                                                                                          | OXYGEN STORAGE/TRANSPORT  |
| 1V4W | CRYSTAL STRUCTURE OF BLUEFIN TUNA HEMOGLOBIN DEOXY FORM AT PH7.5                                                                                                   | OXYGEN STORAGE/TRANSPORT  |
| 1V4X | CRYSTAL STRUCTURE OF BLUEFIN TUNA HEMOGLOBIN DEOXY FORM AT PH5.0                                                                                                   | OXYGEN STORAGE/TRANSPORT  |
| 1V54 | BOVINE HEART CYTOCHROME C OXIDASE AT THE FULLY OXIDIZED STATE                                                                                                      | OXIDOREDUCTASE            |
| 1V55 | BOVINE HEART CYTOCHROME C OXIDASE AT THE FULLY REDUCED STATE                                                                                                       | OXIDOREDUCTASE            |
| 1V5I | CRYSTAL STRUCTURE OF SERINE PROTEASE INHIBITOR POIA1 IN COMPLEX WITH SUBTILISIN BPN'                                                                               | HYDROLASE/PROTEIN BINDING |
| 1V74 | RIBONUCLEASE-INHIBITOR COMPLEX                                                                                                                                     | ANTIBIOTIC/IMMUNE SYSTEM  |
| 1V75 | CRYSTAL STRUCTURE OF HEMOGLOBIN D FROM THE ALDABRA GIANT TORTOISE (GEOCHELONE GIGANTEA) AT 2.0 A RESOLUTION                                                        | OXYGEN STORAGE/TRANSPORT  |
| 1V7M | HUMAN THROMBOPOIETIN FUNCTIONAL DOMAIN COMPLEXED TO NEUTRALIZING ANTIBODY TN1 FAB                                                                                  | IMMUNE SYSTEM/CYTOKINE    |
| 1V7N | HUMAN THROMBOPOIETIN FUNCTIONAL DOMAIN COMPLEXED TO NEUTRALIZING ANTIBODY TN1 FAB                                                                                  | IMMUNE SYSTEM/CYTOKINE    |

|      |                                                                                                                                                                                                                                           |                                      |
|------|-------------------------------------------------------------------------------------------------------------------------------------------------------------------------------------------------------------------------------------------|--------------------------------------|
| 1V7P | STRUCTURE OF EMS16-ALPHA2-I DOMAIN COMPLEX                                                                                                                                                                                                | TOXIN/CELL ADHESION                  |
| 1V9T | STRUCTURE OF E. COLI CYCLOPHILIN B K163T MUTANT BOUND TO SUCCINYL-ALA-PRO-ALA-P-NITROANILIDE                                                                                                                                              | ISOMERASE                            |
| 1VAC | MHC CLASS I H-2KB HEAVY CHAIN COMPLEXED WITH BETA-2 MICROGLOBULIN AND CHICKEN OVALBUMIN                                                                                                                                                   | COMPLEX (MHC I/PEPTIDE)              |
| 1VAD | MHC CLASS I H-2KB HEAVY CHAIN COMPLEXED WITH BETA-2 MICROGLOBULIN AND YEAST ALPHA-GLUCOSIDASE                                                                                                                                             | COMPLEX (MHC I/PEPTIDE)              |
| 1VC3 | CRYSTAL STRUCTURE OF L-ASPARTATE-ALPHA-DECARBOXYLASE                                                                                                                                                                                      | LYASE                                |
| 1VCB | THE VHL-ELONGINC-ELONGINB STRUCTURE                                                                                                                                                                                                       | TRANSCRIPTION                        |
| 1VET | CRYSTAL STRUCTURE OF P14/MP1 AT 1.9 A RESOLUTION                                                                                                                                                                                          | SIGNALING PROTEIN/PROTEIN BINDING    |
| 1VEU | CRYSTAL STRUCTURE OF THE P14/MP1 COMPLEX AT 2.15 A RESOLUTION                                                                                                                                                                             | SIGNALING PROTEIN/PROTEIN BINDING    |
| 1VF5 | RYSTAL STRUCTURE OF CYTOCHROME B6F COMPLEX FROM M.LAMINOSUS                                                                                                                                                                               | PHOTOSYNTHESIS                       |
| 1VF6 | 2.1 ANGSTROM CRYSTAL STRUCTURE OF THE PALS-1-L27N AND PATJ L27 HETERODIMER COMPLEX                                                                                                                                                        | PROTEIN BINDING/PROTEIN TRANSPORT    |
| 1VFB | 3OUND WATER MOLECULES AND CONFORMATIONAL STABILIZATION HELP MEDIATE AN ANTIGEN-ANTIBODY ASSOCIATION                                                                                                                                       | IMMUNOGLOBULIN/HYDROLASE(O-GLYCOSYL) |
| 1VG0 | THE CRYSTAL STRUCTURES OF THE REP-1 PROTEIN IN COMPLEX WITH MONOPRENYLATED RAB7 PROTEIN                                                                                                                                                   | PROTEIN BINDING/PROTEIN TRANSPORT    |
| 1VG9 | THE CRYSTAL STRUCTURES OF THE REP-1 PROTEIN IN COMPLEX WITH C-TERMINALLY TRUNCATED RAB7 PROTEIN                                                                                                                                           | PROTEIN BINDING/PROTEIN TRANSPORT    |
| 1VGC | GAMMA-CHYMOTRYPSIN L-PARA-CHLORO-1-ACETAMIDO BORONIC ACID INHIBITOR COMPLEX                                                                                                                                                               | SERINE PROTEASE                      |
| 1VGE | TR1.9 FAB FRAGMENT OF A HUMAN IGG1 KAPPA AUTOANTIBODY                                                                                                                                                                                     | IMMUNOGLOBULIN                       |
| 1VGK | THE CRYSTAL STRUCTURE OF CLASS I MAJOR HISTOCOMPATIBILITY COMPLEX, H-2KD AT 2.0 A RESOLUTION                                                                                                                                              | IMMUNE SYSTEM                        |
| 1VIT | THROMBIN:HIRUDIN 51-65 COMPLEX                                                                                                                                                                                                            | COMPLEX (SERINE PROTEASE/INHIBITOR)  |
| 1VIW | TENEBRIO MOLITOR ALPHA-AMYLASE-INHIBITOR COMPLEX                                                                                                                                                                                          | COMPLEX (GLYCOSIDASE/INHIBITOR)      |
| 1VLD | CRYSTAL STRUCTURE OF PYROGALLOL-PHLOROGLUCINOL TRANSHYDROXYLASE FROM PELOBACTER ACIDIGALLICI                                                                                                                                              | OXIDOREDUCTASE                       |
| 1VLE | CRYSTAL STRUCTURE OF PYROGALLOL-PHLOROGLUCINOL TRANSHYDROXYLASE FROM PELOBACTER ACIDIGALLICI COMPLEXED WITH PYROGALLOL                                                                                                                    | OXIDOREDUCTASE                       |
| 1VLF | CRYSTAL STRUCTURE OF PYROGALLOL-PHLOROGLUCINOL TRANSHYDROXYLASE FROM PELOBACTER ACIDIGALLICI COMPLEXED WITH INHIBITOR 1,2,4,5-TETRAHYDROXY-BENZENE                                                                                        | OXIDOREDUCTASE                       |
| 1VOQ | CRYSTAL STRUCTURE OF FIVE 70S RIBOSOMES FROM ESCHERICHIA COLI IN COMPLEX WITH PROTEIN Y. THIS FILE CONTAINS THE 30S SUBUNIT OF ONE 70S RIBOSOME. THE ENTIRE CRYSTAL STRUCTURE CONTAINS FIVE 70S RIBOSOMES AND IS DESCRIBED IN REMARK 400. | RIBOSOME                             |
| 1VOS | CRYSTAL STRUCTURE OF FIVE 70S RIBOSOMES FROM ESCHERICHIA COLI IN COMPLEX WITH PROTEIN Y. THIS FILE CONTAINS THE 30S SUBUNIT OF ONE 70S RIBOSOME. THE ENTIRE CRYSTAL STRUCTURE                                                             | RIBOSOME                             |

|      |                                                                                                                                                                                                                                           |                                       |
|------|-------------------------------------------------------------------------------------------------------------------------------------------------------------------------------------------------------------------------------------------|---------------------------------------|
|      | CONTAINS FIVE 70S RIBOSOMES AND IS DESCRIBED IN REMARK 400.                                                                                                                                                                               |                                       |
| 1VOU | CRYSTAL STRUCTURE OF FIVE 70S RIBOSOMES FROM ESCHERICHIA COLI IN COMPLEX WITH PROTEIN Y. THIS FILE CONTAINS THE 50S SUBUNIT OF ONE 70S RIBOSOME. THE ENTIRE CRYSTAL STRUCTURE CONTAINS FIVE 70S RIBOSOMES AND IS DESCRIBED IN REMARK 400. | RIBOSOME                              |
| 1VOV | CRYSTAL STRUCTURE OF FIVE 70S RIBOSOMES FROM ESCHERICHIA COLI IN COMPLEX WITH PROTEIN Y. THIS FILE CONTAINS THE 30S SUBUNIT OF ONE 70S RIBOSOME. THE ENTIRE CRYSTAL STRUCTURE CONTAINS FIVE 70S RIBOSOMES AND IS DESCRIBED IN REMARK 400. | RIBOSOME                              |
| 1VOW | CRYSTAL STRUCTURE OF FIVE 70S RIBOSOMES FROM ESCHERICHIA COLI IN COMPLEX WITH PROTEIN Y. THIS FILE CONTAINS THE 50S SUBUNIT OF ONE 70S RIBOSOME. THE ENTIRE CRYSTAL STRUCTURE CONTAINS FIVE 70S RIBOSOMES AND IS DESCRIBED IN REMARK 400. | RIBOSOME                              |
| 1VOX | CRYSTAL STRUCTURE OF FIVE 70S RIBOSOMES FROM ESCHERICHIA COLI IN COMPLEX WITH PROTEIN Y. THIS FILE CONTAINS THE 30S SUBUNIT OF ONE 70S RIBOSOME. THE ENTIRE CRYSTAL STRUCTURE CONTAINS FIVE 70S RIBOSOMES AND IS DESCRIBED IN REMARK 400. | RIBOSOME                              |
| 1VOY | CRYSTAL STRUCTURE OF FIVE 70S RIBOSOMES FROM ESCHERICHIA COLI IN COMPLEX WITH PROTEIN Y. THIS FILE CONTAINS THE 50S SUBUNIT OF ONE 70S RIBOSOME. THE ENTIRE CRYSTAL STRUCTURE CONTAINS FIVE 70S RIBOSOMES AND IS DESCRIBED IN REMARK 400. | RIBOSOME                              |
| 1VOZ | CRYSTAL STRUCTURE OF FIVE 70S RIBOSOMES FROM ESCHERICHIA COLI IN COMPLEX WITH PROTEIN Y. THIS FILE CONTAINS THE 30S SUBUNIT OF ONE 70S RIBOSOME. THE ENTIRE CRYSTAL STRUCTURE CONTAINS FIVE 70S RIBOSOMES AND IS DESCRIBED IN REMARK 400. | RIBOSOME                              |
| 1VP0 | CRYSTAL STRUCTURE OF FIVE 70S RIBOSOMES FROM ESCHERICHIA COLI IN COMPLEX WITH PROTEIN Y. THIS FILE CONTAINS THE 50S SUBUNIT OF ONE 70S RIBOSOME. THE ENTIRE CRYSTAL STRUCTURE CONTAINS FIVE 70S RIBOSOMES AND IS DESCRIBED IN REMARK 400. | RIBOSOME                              |
| 1VPO | CRYSTAL STRUCTURE ANALYSIS OF THE ANTI-TESTOSTERONE FAB IN COMPLEX WITH TESTOSTERONE                                                                                                                                                      | IMMUNE SYSTEM                         |
| 1VPP | COMPLEX BETWEEN VEGF AND A RECEPTOR BLOCKING PEPTIDE                                                                                                                                                                                      | GROWTH FACTOR/GROWTH FACTOR INHIBITOR |
| 1VQ4 | THE STRUCTURE OF THE TRANSITION STATE ANALOGUE "DAA" BOUND TO THE LARGE RIBOSOMAL SUBUNIT OF HALOARCULA MARISMORTUI                                                                                                                       | RIBOSOME                              |
| 1VQ5 | THE STRUCTURE OF THE TRANSITION STATE ANALOGUE "RAA" BOUND TO THE LARGE RIBOSOMAL SUBUNIT OF HALOARCULA MARISMORTUI                                                                                                                       | RIBOSOME                              |
| 1VQ6 | THE STRUCTURE OF C-HPMN AND CCA-PHE-CAP-BIO BOUND TO THE LARGE RIBOSOMAL SUBUNIT OF HALOARCULA MARISMORTUI                                                                                                                                | RIBOSOME                              |
| 1VQ7 | THE STRUCTURE OF THE TRANSITION STATE ANALOGUE "DCA" BOUND TO THE LARGE RIBOSOMAL SUBUNIT OF HALOARCULA MARISMORTUI                                                                                                                       | RIBOSOME                              |
| 1VQ8 | THE STRUCTURE OF CCDA-PHE-CAP-BIO AND THE ANTIBIOTIC SPARSOMYCIN BOUND TO THE LARGE RIBOSOMAL SUBUNIT OF HALOARCULA MARISMORTUI                                                                                                           | RIBOSOME                              |
| 1VQ9 | THE STRUCTURE OF CCA-PHE-CAP-BIO AND THE ANTIBIOTIC SPARSOMYCIN BOUND TO THE LARGE RIBOSOMAL SUBUNIT OF HALOARCULA MARISMORTUI                                                                                                            | RIBOSOME                              |
| 1VQK | THE STRUCTURE OF CCDA-PHE-CAP-BIO BOUND TO THE A SITE OF THE RIBOSOMAL SUBUNIT OF HALOARCULA MARISMORTUI                                                                                                                                  | RIBOSOME                              |

|      |                                                                                                                                                                                                                                                                                  |                                          |
|------|----------------------------------------------------------------------------------------------------------------------------------------------------------------------------------------------------------------------------------------------------------------------------------|------------------------------------------|
| 1VQL | THE STRUCTURE OF THE TRANSITION STATE ANALOGUE "DCSN" BOUND TO THE LARGE RIBOSOMAL SUBUNIT OF HALOARCUA MARISMORTUI                                                                                                                                                              | RIBOSOME                                 |
| 1VQM | THE STRUCTURE OF THE TRANSITION STATE ANALOGUE "DAN" BOUND TO THE LARGE RIBOSOMAL SUBUNIT OF HALOARCUA MARISMORTUI                                                                                                                                                               | RIBOSOME                                 |
| 1VQN | THE STRUCTURE OF CC-HPMN AND CCA-PHE-CAP-BIO BOUND TO THE LARGE RIBOSOMAL SUBUNIT OF HALOARCUA MARISMORTUI                                                                                                                                                                       | RIBOSOME                                 |
| 1VQO | THE STRUCTURE OF CCPMN BOUND TO THE LARGE RIBOSOMAL SUBUNIT HALOARCUA MARISMORTUI                                                                                                                                                                                                | RIBOSOME                                 |
| 1VQP | THE STRUCTURE OF THE TRANSITION STATE ANALOGUE "RAP" BOUND TO THE LARGE RIBOSOMAL SUBUNIT OF HALOARCUA MARISMORTUI                                                                                                                                                               | RIBOSOME                                 |
| 1VRA | CRYSTAL STRUCTURE OF ARGININE BIOSYNTHESIS BIFUNCTIONAL PROTEIN ARGJ (10175521) FROM BACILLUS HALODURANS AT 2.00 Å RESOLUTION                                                                                                                                                    | TRANSFERASE                              |
| 1VRK | THE 1.9 Å STRUCTURE OF E84K-CALMODULIN RS20 PEPTIDE COMPLEX                                                                                                                                                                                                                      | COMPLEX(CALCIUM-BINDING PROTEIN/PEPTIDE) |
| 1VRQ | CRYSTAL STRUCTURE OF HETEROTETRAMERIC SARCOSINE OXIDASE FROM CORYNEBACTERIUM SP. U-96 IN COMPLEX WITH FOLINIC ACID                                                                                                                                                               | OXIDOREDUCTASE                           |
| 1VRS | CRYSTAL STRUCTURE OF THE DISULFIDE-LINKED COMPLEX BETWEEN THE N-TERMINAL AND C-TERMINAL DOMAIN OF THE ELECTRON TRANSFER CATALYST DSBD                                                                                                                                            | OXIDOREDUCTASE                           |
| 1VRT | HIGH RESOLUTION STRUCTURES OF HIV-1 RT FROM FOUR RT-INHIBITOR COMPLEXES                                                                                                                                                                                                          | NUCLEOTIDYLTRANSFERASE                   |
| 1VRU | HIGH RESOLUTION STRUCTURES OF HIV-1 RT FROM FOUR RT-INHIBITOR COMPLEXES                                                                                                                                                                                                          | NUCLEOTIDYLTRANSFERASE                   |
| 1VS5 | CRYSTAL STRUCTURE OF THE BACTERIAL RIBOSOME FROM ESCHERICHIA COLI IN COMPLEX WITH THE ANTIBIOTIC KASUGAMYIN AT 3.5 Å RESOLUTION. THIS FILE CONTAINS THE 30S SUBUNIT OF ONE 70S RIBOSOME. THE ENTIRE CRYSTAL STRUCTURE CONTAINS TWO 70S RIBOSOMES AND IS DESCRIBED IN REMARK 400. | RIBOSOME                                 |
| 1VS6 | CRYSTAL STRUCTURE OF THE BACTERIAL RIBOSOME FROM ESCHERICHIA COLI IN COMPLEX WITH THE ANTIBIOTIC KASUGAMYIN AT 3.5 Å RESOLUTION. THIS FILE CONTAINS THE 50S SUBUNIT OF ONE 70S RIBOSOME. THE ENTIRE CRYSTAL STRUCTURE CONTAINS TWO 70S RIBOSOMES AND IS DESCRIBED IN REMARK 400. | RIBOSOME                                 |
| 1VS7 | CRYSTAL STRUCTURE OF THE BACTERIAL RIBOSOME FROM ESCHERICHIA COLI IN COMPLEX WITH THE ANTIBIOTIC KASUGAMYIN AT 3.5 Å RESOLUTION. THIS FILE CONTAINS THE 30S SUBUNIT OF ONE 70S RIBOSOME. THE ENTIRE CRYSTAL STRUCTURE CONTAINS TWO 70S RIBOSOMES AND IS DESCRIBED IN REMARK 400. | RIBOSOME                                 |
| 1VS8 | CRYSTAL STRUCTURE OF THE BACTERIAL RIBOSOME FROM ESCHERICHIA COLI IN COMPLEX WITH THE ANTIBIOTIC KASUGAMYIN AT 3.5 Å RESOLUTION. THIS FILE CONTAINS THE 30S SUBUNIT OF ONE 70S RIBOSOME. THE ENTIRE CRYSTAL STRUCTURE CONTAINS TWO 70S RIBOSOMES AND IS DESCRIBED IN REMARK 400. | RIBOSOME                                 |
| 1VSA | CRYSTAL STRUCTURE OF A 70S RIBOSOME-TRNA COMPLEX REVEALS FUNCTIONAL INTERACTIONS AND REARRANGEMENTS. THIS FILE, 1VSA, CONTAINS THE 50S RIBOSOME SUBUNIT. 30S RIBOSOME SUBUNIT IS IN THE FILE 20W8                                                                                | RIBOSOME                                 |
| 1VSQ | SOLUTION NMR STRUCTURE OF THE PRODUCTIVE COMPLEX BETWEEN                                                                                                                                                                                                                         | TRANSFERASE                              |



| IIAMANNOSE AND IIBMANNOSE OF THE MANNANOSE TRANSPORTER OF THE E. COLI PHOSPHOTRANSFERASE SYSTEM |                                                                                                                                                 |                           |
|-------------------------------------------------------------------------------------------------|-------------------------------------------------------------------------------------------------------------------------------------------------|---------------------------|
| 1VWT                                                                                            | T STATE HUMAN HEMOGLOBIN [ALPHA V96W], ALPHA AQUOMET, BETA DEOXY                                                                                | OXYGEN TRANSPORT          |
| 1VYH                                                                                            | PAF-AH HOLOENZYME: LIS1/ALFA2                                                                                                                   | HYDROLASE                 |
| 1VYJ                                                                                            | STRUCTURAL AND BIOCHEMICAL STUDIES OF HUMAN PCNA COMPLEXES PROVIDE THE BASIS FOR ASSOCIATION WITH CDK/CYCLIN AND RATIONALE FOR INHIBITOR DESIGN | DNA-BINDING PROTEIN       |
| 1VYT                                                                                            | BETA3 SUBUNIT COMPLEXED WITH AID                                                                                                                | ION TRANSPORT/COMPLEX     |
| 1VYW                                                                                            | STRUCTURE OF CDK2/CYCLIN A WITH PNU-292137                                                                                                      | PROTEIN KINASE/COMPLEX    |
| 1VZJ                                                                                            | STRUCTURE OF THE TETRAMERIZATION DOMAIN OF ACETYLCHOLINESTERASE: FOUR-FOLD INTERACTION OF A WWW MOTIF WITH A LEFT-HANDED POLYPROLINE HELIX      | HYDROLASE                 |
| 1VZQ                                                                                            | COMPLEX OF THROMBIN WITH DESIGNED INHIBITOR 7165                                                                                                | HYDROLASE                 |
| 1W0J                                                                                            | BERYLLIUM FLUORIDE INHIBITED BOVINE F1-ATPASE                                                                                                   | HYDROLASE                 |
| 1W0K                                                                                            | BERYLLIUM FLUORIDE INHIBITED BOVINE F1-ATPASE                                                                                                   | HYDROLASE                 |
| 1W0V                                                                                            | CRYSTAL STRUCTURE OF HLA-B*2705 COMPLEXED WITH THE SELF-PEPTIDE TIS FROM EGF-RESPONSE FACTOR 1                                                  | IMMUNE SYSTEM             |
| 1W0W                                                                                            | CRYSTAL STRUCTURE OF HLA-B*2709 COMPLEXED WITH THE SELF-PEPTIDE TIS FROM EGF-RESPONSE FACTOR 1                                                  | IMMUNE SYSTEM             |
| 1W0Y                                                                                            | TF7A_3771 COMPLEX                                                                                                                               | HYDROLASE                 |
| 1W1I                                                                                            | CRYSTAL STRUCTURE OF DIPEPTIDYL PEPTIDASE IV (DPPIV OR CD26) IN COMPLEX WITH ADENOSINE DEAMINASE                                                | HYDROLASE/COMPLEX         |
| 1W2B                                                                                            | TRIGGER FACTOR RIBOSOME BINDING DOMAIN IN COMPLEX WITH 50S                                                                                      | RIBOSOME                  |
| 1W2K                                                                                            | TF7A_4380 COMPLEX                                                                                                                               | HYDROLASE                 |
| 1W2W                                                                                            | CRYSTAL STRUCTURE OF YEAST YPR118W, A METHYLTHIORIBOSE-1-PHOSPHATE ISOMERASE RELATED TO REGULATORY EIF2B SUBUNITS                               | ISOMERASE                 |
| 1W3C                                                                                            | CRYSTAL STRUCTURE OF THE HEPATITIS C VIRUS NS3 PROTEASE IN COMPLEX WITH A PEPTIDOMIMETIC INHIBITOR                                              | HYDROLASE                 |
| 1W5C                                                                                            | PHOTOSYSTEM II FROM THERMOSYNECHOCOCCUS ELONGATUS                                                                                               | PHOTOSYNTHESIS            |
| 1W72                                                                                            | CRYSTAL STRUCTURE OF HLA-A1:MAGE-A1 IN COMPLEX WITH FAB-HYB3                                                                                    | COMPLEX, HLA/FAB FRAGMENT |
| 1W7I                                                                                            | CRYSTAL STRUCTURE OF MYOSIN V MOTOR WITHOUT NUCLEOTIDE SOAKED IN 10 MM MGADP                                                                    | MOTOR PROTEIN             |
| 1W7J                                                                                            | CRYSTAL STRUCTURE OF MYOSIN V MOTOR WITH ESSENTIAL LIGHT CHAIN + ADP-BEFX- NEAR RIGOR                                                           | MOTOR PROTEIN             |
| 1W7P                                                                                            | THE CRYSTAL STRUCTURE OF ENDOSOMAL COMPLEX ESCRT-II (VPS22/VPS25/VPS36)                                                                         | PROTEIN TRANSPORT         |
| 1W7V                                                                                            | ZNMG SUBSTITUTED AMINOPEPTIDASE P FROM E. COLI                                                                                                  | HYDROLASE                 |
| 1W7X                                                                                            | FACTOR7- 413 COMPLEX                                                                                                                            | HYDROLASE                 |
| 1W80                                                                                            | CRYSTAL STRUCTURE OF THE ALPHA-ADAPTIN APPENDAGE DOMAIN,                                                                                        | ENDOCYTOSIS/EXOCYTOSIS    |

FROM THE AP2 ADAPTOR COMPLEX, BOUND TO 2 PEPTIDES FROM  
SYNAPTOJANIN170

|      |                                                                                                                                                                                     |                                       |
|------|-------------------------------------------------------------------------------------------------------------------------------------------------------------------------------------|---------------------------------------|
| 1W85 | THE CRYSTAL STRUCTURE OF PYRUVATE DEHYDROGENASE E1 BOUND TO THE PERIPHERAL SUBUNIT BINDING DOMAIN OF E2                                                                             | OXIDOREDUCTASE                        |
| 1W88 | THE CRYSTAL STRUCTURE OF PYRUVATE DEHYDROGENASE E1(D180N, E183Q) BOUND TO THE PERIPHERAL SUBUNIT BINDING DOMAIN OF E2                                                               | OXIDOREDUCTASE                        |
| 1W8P | STRUCTURAL PROPERTIES OF THE B25TYR-NME-B26PHE INSULIN MUTANT.                                                                                                                      | HORMONE/GROWTH FACTOR                 |
| 1W8X | STRUCTURAL ANALYSIS OF PRD1                                                                                                                                                         | VIRUS                                 |
| 1W98 | THE STRUCTURAL BASIS OF CDK2 ACTIVATION BY CYCLIN E                                                                                                                                 | TRANSFERASE                           |
| 1W9E | CRYSTAL STRUCTURE OF THE PDZ TANDEM OF HUMAN SYNTENIN IN COMPLEX WITH TNEFYF PEPTIDE                                                                                                | ADHESION/COMPLEX                      |
| 1W9O | CRYSTAL STRUCTURE OF THE PDZ TANDEM OF HUMAN SYNTENIN IN COMPLEX WITH TNEYVYV PEPTIDE                                                                                               | ADHESION/COMPLEX                      |
| 1W9Q | CRYSTAL STRUCTURE OF THE PDZ TANDEM OF HUMAN SYNTENIN IN COMPLEX WITH TNEFAF PEPTIDE                                                                                                | ADHESION/COMPLEX                      |
| 1WA8 | SOLUTION STRUCTURE OF THE CFP-10.ESAT-6 COMPLEX. MAJOR VIRULENCE DETERMINANTS OF PATHOGENIC MYCOBACTERIA                                                                            | TUBERCULOSIS                          |
| 1WAV | CRYSTAL STRUCTURE OF FORM B MONOCLINIC CRYSTAL OF INSULIN                                                                                                                           | HORMONE                               |
| 1WAY | ACTIVE SITE THROMBIN INHIBITORS                                                                                                                                                     | HYDROLASE                             |
| 1WBG | ACTIVE SITE THROMBIN INHIBITORS                                                                                                                                                     | COMPLEX (BLOOD COAGULATION/INHIBITOR) |
| 1WBJ | WILDTYPE TRYPTOPHAN SYNTHASE COMPLEXED WITH GLYCEROL PHOSPHATE                                                                                                                      | LYASE                                 |
| 1WBP | SRPK1 BOUND TO 9MER DOCKING MOTIF PEPTIDE                                                                                                                                           | TRANSFERASE                           |
| 1WBX | CRYSTAL STRUCTURES OF MURINE MHC CLASS I H-2 DB AND KB MOLECULES IN COMPLEX WITH CTL EPITOPES FROM INFLUENZA A VIRUS: IMPLICATIONS FOR TCR REPERTOIRE SELECTION AND IMMUNODOMINANCE | IMMUNE SYSTEM                         |
| 1WBY | CRYSTAL STRUCTURES OF MURINE MHC CLASS I H-2 DB AND KB MOLECULES IN COMPLEX WITH CTL EPITOPES FROM INFLUENZA A VIRUS: IMPLICATIONS FOR TCR REPERTOIRE SELECTION AND IMMUNODOMINANCE | IMMUNE SYSTEM                         |
| 1WBZ | CRYSTAL STRUCTURES OF MURINE MHC CLASS I H-2 DB AND KB MOLECULES IN COMPLEX WITH CTL EPITOPES FROM INFLUENZA A VIRUS: IMPLICATIONS FOR TCR REPERTOIRE SELECTION AND IMMUNODOMINANCE | IMMUNE SYSTEM                         |
| 1WCB | PLP-DEPENDENT CATALYTIC ANTIBODY 15A9 IN COMPLEX WITH ITS HAPTEN                                                                                                                    | IMMUNE SYSTEM                         |
| 1WCI | REACTIVITY MODULATION OF HUMAN BRANCHED-CHAIN ALPHA-KETOACID DEHYDROGENASE BY AN INTERNAL MOLECULAR SWITCH                                                                          | OXIDOREDUCTASE                        |
| 1WCM | COMPLETE 12-SUBUNIT RNA POLYMERASE II AT 3.8 ANG                                                                                                                                    | TRANSCRIPTION                         |
| 1WCY | CRYSTAL STRUCTURE OF HUMAN DIPEPTIDYL PEPTIDASE IV (DPPIV) COMPLEX WITH DIPROTIIN A                                                                                                 | HYDROLASE                             |

|      |                                                                                                                            |                                         |
|------|----------------------------------------------------------------------------------------------------------------------------|-----------------------------------------|
| 1WDC | SCALLOP MYOSIN REGULATORY DOMAIN                                                                                           | MUSCLE PROTEIN                          |
| 1WDD | CRYSTAL STRUCTURE OF ACTIVATED RICE RUBISCO COMPLEXED WITH 2-CARBOXYARABINITOL-1,5-BISPHOSPHATE                            | LYASE                                   |
| 1WDK | FATTY ACID BETA-OXIDATION MULTIENZYME COMPLEX FROM PSEUDOMONAS FRAGI, FORM I (NATIVE2)                                     | LYASE,OXIDOREDUCTASE/TRANSFERASE        |
| 1WDL | FATTY ACID BETA-OXIDATION MULTIENZYME COMPLEX FROM PSEUDOMONAS FRAGI, FORM II (NATIVE4)                                    | LYASE,OXIDOREDUCTASE/TRANSFERASE        |
| 1WDM | FATTY ACID BETA-OXIDATION MULTIENZYME COMPLEX FROM PSEUDOMONAS FRAGI, FORM I (NATIVE3)                                     | LYASE,OXIDOREDUCTASE/TRANSFERASE        |
| 1WDW | STRUCTURAL BASIS OF MUTUAL ACTIVATION OF THE TRYPTOPHAN SYNTHASE A2B2 COMPLEX FROM A HYPERTHERMOPHILE, PYROCOCCUS FURIOSUS | LYASE                                   |
| 1WE3 | CRYSTAL STRUCTURE OF THE CHAPERONIN COMPLEX CPN60/CPN10/(ADP)7 FROM THERMUS THERMOPHILUS                                   | CHAPERONE                               |
| 1WEJ | IGG1 FAB FRAGMENT (OF E8 ANTIBODY) COMPLEXED WITH HORSE CYTOCHROME C AT 1.8 A RESOLUTION                                   | COMPLEX (ANTIBODY/ELECTRON TRANSPORT)   |
| 1WHS | STRUCTURE OF THE COMPLEX OF L-BENZYL SUCCINATE WITH WHEAT SERINE CARBOXYPEPTIDASE II AT 2.0 ANGSTROMS RESOLUTION           | SERINE CARBOXYPEPTIDASE                 |
| 1WHT | STRUCTURE OF THE COMPLEX OF L-BENZYL SUCCINATE WITH WHEAT SERINE CARBOXYPEPTIDASE II AT 2.0 ANGSTROMS RESOLUTION           | SERINE CARBOXYPEPTIDASE                 |
| 1WKR | CRYSTAL STRUCTURE OF ASPARTIC PROTEINASE FROM IRPEX LACTEUS                                                                | HYDROLASE                               |
| 1WKW | CRYSTAL STRUCTURE OF THE TERNARY COMPLEX OF EIF4E-M7GPPA-4EBP1 PEPTIDE                                                     | TRANSLATION/PROTEIN BINDING             |
| 1WLP | SOLUTION STRUCTURE OF THE P22PHOX-P47PHOX COMPLEX                                                                          | OXIDOREDUCTASE/SIGNALING PROTEIN        |
| 1WLQ | STRUCTURE OF GEMININ-CDT1 COMPLEX                                                                                          | CELL CYCLE                              |
| 1WM0 | PPARGAMMA IN COMPLEX WITH A 2-BABA COMPOUND                                                                                | TRANSCRIPTION/SIGNALING PROTEIN         |
| 1WMH | CRYSTAL STRUCTURE OF A PB1 DOMAIN COMPLEX OF PROTEIN KINASE C IOTA AND PAR6 ALPHA                                          | TRANSFERASE/CELL CYCLE                  |
| 1WMI | CRYSTAL STRUCTURE OF ARCHAEAL RELE-RELB COMPLEX FROM PYROCOCCUS HORIKOSHII OT3                                             | HYDROLASE/HYDROLASE INHIBITOR           |
| 1WMU | CRYSTAL STRUCTURE OF HEMOGLOBIN D FROM THE ALDABRA GIANT TORTOISE, GEOCHELONE GIGANTEA, AT 1.65 A RESOLUTION               | OXYGEN STORAGE/TRANSPORT                |
| 1WPL | CRYSTAL STRUCTURE OF THE INHIBITORY FORM OF RAT GTP CYCLOHYDROLASE I/GFRP COMPLEX                                          | HYDROLASE/PROTEIN BINDING               |
| 1WPX | CRYSTAL STRUCTURE OF CARBOXYPEPTIDASE Y INHIBITOR COMPLEXED WITH THE COGNATE PROTEINASE                                    | HYDROLASE                               |
| 1WQ1 | RAS-RASGAP COMPLEX                                                                                                         | COMPLEX (GTP-BINDING/GTPASE ACTIVATION) |
| 1WQ9 | CRYSTAL STRUCTURE OF VR-1, A VEGF-F FROM A SNAKE VENOM                                                                     | TOXIN                                   |
| 1WQJ | STRUCTURAL BASIS FOR THE REGULATION OF INSULIN-LIKE GROWTH FACTORS (IGFS) BY IGF BINDING PROTEINS (IGFBPS)                 | PROTEIN BINDING/HORMONE/GROWTH FACTOR   |
| 1WQL | CUMENE DIOXYGENASE (CUMA1A2) FROM PSEUDOMONAS FLUORESCENS IP01                                                             | OXIDOREDUCTASE                          |

|      |                                                                                                                                                                                         |                                     |
|------|-----------------------------------------------------------------------------------------------------------------------------------------------------------------------------------------|-------------------------------------|
| 1WQV | HUMAN FACTOR VIIA-TISSUE FACTOR COMPLEXED WITH<br>PROPYLSULFONAMIDE-D-THR-MET-P-AMINOBENZAMIDINE                                                                                        | HYDROLASE                           |
| 1WR6 | CRYSTAL STRUCTURE OF GGA3 GAT DOMAIN IN COMPLEX WITH<br>UBIQUITIN                                                                                                                       | PROTEIN TRANSPORT/SIGNALING PROTEIN |
| 1WRD | CRYSTAL STRUCTURE OF TOM1 GAT DOMAIN IN COMPLEX WITH<br>UBIQUITIN                                                                                                                       | PROTEIN TRANSPORT/SIGNALING PROTEIN |
| 1WRZ | CALMODULIN COMPLEXED WITH A PEPTIDE FROM A HUMAN DEATH-<br>ASSOCIATED PROTEIN KINASE                                                                                                    | METAL BINDING PROTEIN/TRANSFERASE   |
| 1WSS | HUMAN FACTOR VIIA-TISSUE FACTOR IN COMPLEX WITH PEPRID<br>MIMETIC INHIBITOR THAT HAS TWO CHARGE GROUPS IN P2 AND P4                                                                     | HYDROLASE/BLOOD CLOTTING            |
| 1WT9 | CRYSTAL STRUCTURE OF AA-X-BP-I, A SNAKE VENOM PROTEIN WITH<br>THE ACTIVITY OF BINDING TO COAGULATION FACTOR X FROM<br>AGKISTRODON ACUTUS                                                | BLOOD CLOTTING                      |
| 1WTG | HUMAN FACTOR VIIA-TISSUE FACTOR COMPLEXED WITH<br>ETHYLSULFONAMIDE-D-BIPHENYLALANINE-GLN-P-AMINOBENZAMIDINE                                                                             | HYDROLASE/BLOOD CLOTTING            |
| 1WTH | CRYSTAL STRUCTURE OF GP5-S351L MUTANT AND GP27 COMPLEX                                                                                                                                  | HYDROLASE/STRUCTURAL PROTEIN        |
| 1WU1 | FACTOR XA IN COMPLEX WITH THE INHIBITOR 4-[(5-CHLOROINDOL-2-<br>YL)SULFONYL]-2-(2-METHYLPROPYL)-1-[[5-(PYRIDIN-4-YL)<br>PYRIMIDIN-2-YL]CARBONYL]PIPERAZINE                              | HYDROLASE                           |
| 1WUH | THREE-DIMENSIONAL STRUCTURE OF THE NI-A STATE OF<br>[NIFE]HYDROGENASE FROM DESULUFOVIBRIO VULGARIS MIYAZAKI F                                                                           | OXIDOREDUCTASE                      |
| 1WUI | ULTRA-HIGH RESOLUTION STRUCTURE OF THE NI-A STATE OF<br>[NIFE]HYDROGENASE FROM DESULUFOVIBRIO VULGARIS MIYAZAKI F                                                                       | OXIDOREDUCTASE                      |
| 1WUJ | THREE-DIMENSIONAL STRUCTURE OF THE NI-B STATE OF<br>[NIFE]HYDROGENASE FROM DESULUFOVIBRIO VULGARIS MIYAZAKI F                                                                           | OXIDOREDUCTASE                      |
| 1WUK | HIGH RESOLUTION STRUCTURE OF THE OXIDIZED STATE OF<br>[NIFE]HYDROGENASE FROM DESULUFOVIBRIO VULGARIS MIYAZAKI F                                                                         | OXIDOREDUCTASE                      |
| 1WUL | HIGH RESOLUTION STRUCTURE OF THE REDUCED STATE OF<br>[NIFE]HYDROGENASE FROM DESULUFOVIBRIO VULGARIS MIYAZAKI F                                                                          | OXIDOREDUCTASE                      |
| 1WUN | HUMAN FACTOR VIIA-TISSUE FACTOR COMPLEXED WITH<br>ETHYLSULFONAMIDE-D-TRP-GLN-P-AMINOBENZAMIDINE                                                                                         | HYDROLASE/BLOOD CLOTTING            |
| 1WV7 | HUMAN FACTOR VIIA-TISSUE FACTOR COMPLEXED WITH<br>ETHYLSULFONAMIDE-D-5-PROPOXY-TRP-GLN-P-AMINOBENZAMIDINE                                                                               | HYDROLASE/BLOOD CLOTTING            |
| 1WVE | P-CRESOL METHYLHYDROXYLASE: ALTERATION OF THE STRUCTURE OF<br>THE FLAVOPROTEIN SUBUNIT UPON ITS BINDING TO THE<br>CYTOCHROME SUBUNIT                                                    | OXIDOREDUCTASE                      |
| 1WWW | NGF IN COMPLEX WITH DOMAIN 5 OF THE TRKA RECEPTOR                                                                                                                                       | NERVE GROWTH FACTOR/TRKA COMPLEX    |
| 1WX2 | CRYSTAL STRUCTURE OF THE OXY-FORM OF THE COPPER-BOUND<br>STREPTOMYCES CASTANEOGLOBISPORUS TYROSINASE COMPLEXED WITH<br>A CADDIE PROTEIN PREPARED BY THE ADDITION OF<br>HYDROGENPEROXIDE | OXIDOREDUCTASE/METAL TRANSPORT      |
| 1WX3 | CRYSTAL STRUCTURE OF THE MET-FORM OF THE COPPER-BOUND<br>STREPTOMYCES CASTANEOGLOBISPORUS TYROSINASE COMPLEXED WITH<br>A CADDIE PROTEIN                                                 | OXIDOREDUCTASE/METAL TRANSPORT      |

|      |                                                                                                                                                                              |                                          |
|------|------------------------------------------------------------------------------------------------------------------------------------------------------------------------------|------------------------------------------|
| 1WX4 | CRYSTAL STRUCTURE OF THE OXY-FORM OF THE COPPER-BOUND STREPTOMYCES CASTANEOGLOBISPORUS TYROSINASE COMPLEXED WITH A CADDIE PROTEIN PREPARED BY THE ADDITION OF DITHIOTHREITOL | OXIDOREDUCTASE/METAL TRANSPORT           |
| 1WX5 | CRYSTAL STRUCTURE OF THE COPPER-FREE STREPTOMYCES CASTANEOGLOBISPORUS TYROSINASE COMPLEXED WITH A CADDIE PROTEIN IN THE MONOCLINIC CRYSTAL                                   | OXIDOREDUCTASE/METAL TRANSPORT           |
| 1WXC | CRYSTAL STRUCTURE OF THE COPPER-FREE STREPTOMYCES CASTANEOGLOBISPORUS TYROSINASE COMPLEXED WITH A CADDIE PROTEIN                                                             | OXIDOREDUCTASE/METAL TRANSPORT           |
| 1WYT | CRYSTAL STRUCTURE OF GLYCINE DECARBOXYLASE (P-PROTEIN) OF THE GLYCINE CLEAVAGE SYSTEM, IN APO FORM                                                                           | OXIDOREDUCTASE                           |
| 1WYU | CRYSTAL STRUCTURE OF GLYCINE DECARBOXYLASE (P-PROTEIN) OF THE GLYCINE CLEAVAGE SYSTEM, IN HOLO FORM                                                                          | OXIDOREDUCTASE                           |
| 1WYV | CRYSTAL STRUCTURE OF GLYCINE DECARBOXYLASE (P-PROTEIN) OF THE GLYCINE CLEAVAGE SYSTEM, IN INHIBITOR-BOUND FORM                                                               | OXIDOREDUCTASE                           |
| 1WYW | CRYSTAL STRUCTURE OF SUMO1-CONJUGATED THYMINE DNA GLYCOSYLASE                                                                                                                | HYDROLASE                                |
| 1X11 | X11 PTB DOMAIN                                                                                                                                                               | COMPLEX (PEPTIDE BINDING MODULE/PEPTIDE) |
| 1X1U | WATER-MEDIATE INTERACTION AT APROTEIN-PROTEIN INTERFACE                                                                                                                      | HYDROLASE/PROTEIN BINDING                |
| 1X1W | WATER-MEDIATE INTERACTION AT APROTEIN-PROTEIN INTERFACE                                                                                                                      | HYDROLASE/PROTEIN BINDING                |
| 1X1X | WATER-MEDIATE INTERACTION AT APROTEIN-PROTEIN INTERFACE                                                                                                                      | HYDROLASE/PROTEIN BINDING                |
| 1X1Y | WATER-MEDIATE INTERACTION AT APROTEIN-PROTEIN INTERFACE                                                                                                                      | HYDROLASE/PROTEIN BINDING                |
| 1X27 | CRYSTAL STRUCTURE OF LCK SH2-SH3 WITH SH2 BINDING SITE OF P130CAS                                                                                                            | SIGNALING PROTEIN                        |
| 1X2T | CRYSTAL STRUCTURE OF HABU IX-BP AT PH 6.5                                                                                                                                    | PROTEIN BINDING                          |
| 1X2W | CRYSTAL STRUCTURE OF APO-HABU IX-BP AT PH 4.6                                                                                                                                | PROTEIN BINDING                          |
| 1X31 | CRYSTAL STRUCTURE OF HETEROTETRAMERIC SARCOSINE OXIDASE FROM CORYNEBACTERIUM SP. U-96                                                                                        | OXIDOREDUCTASE                           |
| 1X3W | STRUCTURE OF A PEPTIDE:N-GLYCANASE-RAD23 COMPLEX                                                                                                                             | HYDROLASE                                |
| 1X3Z | STRUCTURE OF A PEPTIDE:N-GLYCANASE-RAD23 COMPLEX                                                                                                                             | HYDROLASE                                |
| 1X75 | CCDB:GYRA14 COMPLEX                                                                                                                                                          | ISOMERASE/SIGNALING PROTEIN              |
| 1X76 | CRYSTAL STRUCTURE OF ESTROGEN RECEPTOR BETA COMPLEXED WITH WAY-697                                                                                                           | TRANSCRIPTION                            |
| 1X78 | CRYSTAL STRUCTURE OF ESTROGEN RECEPTOR BETA COMPLEXED WITH WAY-244                                                                                                           | TRANSCRIPTION                            |
| 1X79 | CRYSTAL STRUCTURE OF HUMAN GGA1 GAT DOMAIN COMPLEXED WITH THE GAT-BINDING DOMAIN OF RABAPTIN5                                                                                | PROTEIN TRANSPORT                        |
| 1X7B | CRYSTAL STRUCTURE OF ESTROGEN RECEPTOR BETA COMPLEXED WITH ERB-041                                                                                                           | TRANSCRIPTION                            |
| 1X7E | CRYSTAL STRUCTURE OF ESTROGEN RECEPTOR ALPHA COMPLEXED WITH WAY-244                                                                                                          | TRANSCRIPTION                            |

|      |                                                                                                                                                                              |                                          |
|------|------------------------------------------------------------------------------------------------------------------------------------------------------------------------------|------------------------------------------|
| 1X7J | CRYSTAL STRUCTURE OF ESTROGEN RECEPTOR BETA COMPLEXED WITH GENISTEIN                                                                                                         | TRANSCRIPTION                            |
| 1X7Q | CRYSTAL STRUCTURE OF HLA-A*1101 WITH SARS NUCLEOCAPSID PEPTIDE                                                                                                               | IMMUNE SYSTEM                            |
| 1X7R | CRYSTAL STRUCTURE OF ESTROGEN RECEPTOR ALPHA COMPLEXED WITH GENISTEIN                                                                                                        | TRANSCRIPTION                            |
| 1X7W | CRYSTAL STRUCTURE OF THE HUMAN MITOCHONDRIAL BRANCHED-CHAIN ALPHA-KETOACID DEHYDROGENASE                                                                                     | OXIDOREDUCTASE                           |
| 1X7X | CRYSTAL STRUCTURE OF THE HUMAN MITOCHONDRIAL BRANCHED-CHAIN ALPHA-KETOACID DEHYDROGENASE                                                                                     | OXIDOREDUCTASE                           |
| 1X7Y | CRYSTAL STRUCTURE OF THE HUMAN MITOCHONDRIAL BRANCHED-CHAIN ALPHA-KETOACID DEHYDROGENASE                                                                                     | OXIDOREDUCTASE                           |
| 1X7Z | CRYSTAL STRUCTURE OF THE HUMAN MITOCHONDRIAL BRANCHED-CHAIN ALPHA-KETOACID DEHYDROGENASE                                                                                     | OXIDOREDUCTASE                           |
| 1X80 | CRYSTAL STRUCTURE OF THE HUMAN MITOCHONDRIAL BRANCHED-CHAIN ALPHA-KETOACID DEHYDROGENASE                                                                                     | OXIDOREDUCTASE                           |
| 1X81 | FARNESYL TRANSFERASE STRUCTURE OF JANSEN COMPOUND                                                                                                                            | TRANSFERASE                              |
| 1X86 | CRYSTAL STRUCTURE OF THE DH/PH DOMAINS OF LEUKEMIA-ASSOCIATED RHOGEF IN COMPLEX WITH RHOA                                                                                    | SIGNALING PROTEIN/MEMBRANE PROTEIN       |
| 1X8S | STRUCTURE OF THE PAR-6 PDZ DOMAIN WITH A PALS1 INTERNAL LIGAND                                                                                                               | CELL CYCLE                               |
| 1X9F | HEMOGLOBIN DODECAMER FROM LUMBRICUS ERYTHROCRUORIN                                                                                                                           | OXYGEN STORAGE/TRANSPORT                 |
| 1X9M | T7 DNA POLYMERASE IN COMPLEX WITH AN N-2-ACETYLAMINOFLUORENE-ADDUCTED DNA                                                                                                    | TRANSFERASE/ELECTRON TRANSPORT/DNA       |
| 1X9S | T7 DNA POLYMERASE IN COMPLEX WITH A PRIMER/TEMPLATE DNA CONTAINING A DISORDERED N-2 AMINOFLUORENE ON THE TEMPLATE, CRYSTALLIZED WITH DIDEOXY-CTP AS THE INCOMING NUCLEOTIDE. | TRANSFERASE/ELECTRON TRANSPORT/DNA       |
| 1X9T | THE CRYSTAL STRUCTURE OF HUMAN ADENOVIRUS 2 PENTON BASE IN COMPLEX WITH AN AD2 N-TERMINAL FIBRE PEPTIDE                                                                      | VIRUS LIKE PARTICLE/PEPTIDE              |
| 1X9W | T7 DNA POLYMERASE IN COMPLEX WITH A PRIMER/TEMPLATE DNA CONTAINING A DISORDERED N-2 AMINOFLUORENE ON THE TEMPLATE, CRYSTALLIZED WITH DIDEOXY-ATP AS THE INCOMING NUCLEOTIDE. | TRANSFERASE/ELECTRON TRANSPORT/DNA       |
| 1XB1 | THE STRUCTURE OF THE BIR DOMAIN OF IAP-LIKE PROTEIN 2                                                                                                                        | APOPTOSIS                                |
| 1XB2 | CRYSTAL STRUCTURE OF BOS TAURUS MITOCHONDRIAL ELONGATION FACTOR TU/TX COMPLEX                                                                                                | TRANSLATION                              |
| 1XB7 | X-RAY STRUCTURE OF ERRALPHA LBD IN COMPLEX WITH A PGC-1ALPHA PEPTIDE AT 2.5A RESOLUTION                                                                                      | TRANSCRIPTION                            |
| 1XCG | CRYSTAL STRUCTURE OF HUMAN RHOA IN COMPLEX WITH DH/PH FRAGMENT OF PDZRHOGEF                                                                                                  | SIGNALING PROTEIN ACTIVATOR/SIGNALING PR |
| 1XCQ | COMPLEX HCV CORE-FAB 19D9D6-PROTEIN L MUTANT (D55A,L57H, Y64W) IN SPACE GROUP P21                                                                                            | IMMUNE SYSTEM                            |
| 1XCT | COMPLEX HCV CORE-FAB 19D9D6-PROTEIN L MUTANT (D55A, L57H, Y64W) IN SPACE GROUP P21212                                                                                        | IMMUNE SYSTEM                            |

|      |                                                                                                                                                           |                                |
|------|-----------------------------------------------------------------------------------------------------------------------------------------------------------|--------------------------------|
| 1XD2 | CRYSTAL STRUCTURE OF A TERNARY RAS:SOS:RAS*GDP COMPLEX                                                                                                    | SIGNALING PROTEIN              |
| 1XD3 | CRYSTAL STRUCTURE OF UCHL3-UBVME COMPLEX                                                                                                                  | HYDROLASE                      |
| 1XDA | STRUCTURE OF INSULIN                                                                                                                                      | HORMONE                        |
| 1XDK | CRYSTAL STRUCTURE OF THE RARBETA/RXRALPHA LIGAND BINDING DOMAIN HETERODIMER IN COMPLEX WITH 9-CIS RETINOIC ACID AND A FRAGMENT OF THE TRAP220 COACTIVATOR | HORMONE/GROWTH FACTOR RECEPTOR |
| 1XEW | STRUCTURAL BIOCHEMISTRY OF ATP-DRIVEN DIMERIZATION AND DNA STIMULATED ACTIVATION OF SMC ATPASES.                                                          | CELL CYCLE                     |
| 1XF2 | STRUCTURE OF FAB DNA-1 COMPLEXED WITH DT3                                                                                                                 | IMMUNE SYSTEM/DNA              |
| 1XF3 | STRUCTURE OF LIGAND-FREE FAB DNA-1 IN SPACE GROUP P65                                                                                                     | IMMUNE SYSTEM                  |
| 1XF4 | STRUCTURE OF LIGAND-FREE FAB DNA-1 IN SPACE GROUP P321 SOLVED FROM CRYSTALS WITH PERFECT HEMIHEDRAL TWINNING                                              | IMMUNE SYSTEM                  |
| 1XF5 | COMPLEX HCV CORE-FAB 19D9D6-PROTEIN L MUTANT (H74C, Y64W)IN SPACE GROUP P21212                                                                            | IMMUNE SYSTEM                  |
| 1XF6 | HIGH RESOLUTION CRYSTAL STRUCTURE OF PHYCOERYTHRIN 545 FROM THE MARINE CRYPTOPHYTE RHODOMONAS CS24                                                        | PHOTOSYNTHESIS                 |
| 1XFP | CRYSTAL STRUCTURE OF THE CDR2 GERMLINE REVERSION MUTANT OF CAB-LYS3 IN COMPLEX WITH HEN EGG WHITE LYSOZYME                                                | IMMUNE SYSTEM/HYDROLASE        |
| 1XFU | CRYSTAL STRUCTURE OF ANTHRAX EDEMA FACTOR (EF) TRUNCATION MUTANT, EF-DELTA 64 IN COMPLEX WITH CALMODULIN                                                  | LYASE/METAL BINDING PROTEIN    |
| 1XFV | CRYSTAL STRUCTURE OF ANTHRAX EDEMA FACTOR (EF) IN COMPLEX WITH CALMODULIN AND 3' DEOXY-ATP                                                                | LYASE/METAL BINDING PROTEIN    |
| 1XFW | CRYSTAL STRUCTURE OF ANTHRAX EDEMA FACTOR (EF) IN COMPLEX WITH CALMODULIN AND 3'5' CYCLIC AMP (CAMP)                                                      | LYASE/METAL BINDING PROTEIN    |
| 1XFX | CRYSTAL STRUCTURE OF ANTHRAX EDEMA FACTOR (EF) IN COMPLEX WITH CALMODULIN IN THE PRESENCE OF 10 MILLIMOLAR EXOGENOUSLY ADDED CALCIUM CHLORIDE             | LYASE/METAL BINDING PROTEIN    |
| 1XFY | CRYSTAL STRUCTURE OF ANTHRAX EDEMA FACTOR (EF) IN COMPLEX WITH CALMODULIN                                                                                 | LYASE/METAL BINDING PROTEIN    |
| 1XFZ | CRYSTAL STRUCTURE OF ANTHRAX EDEMA FACTOR (EF) IN COMPLEX WITH CALMODULIN IN THE PRESENCE OF 1 MILLIMOLAR EXOGENOUSLY ADDED CALCIUM CHLORIDE              | LYASE/METAL BINDING PROTEIN    |
| 1XG0 | HIGH RESOLUTION CRYSTAL STRUCTURE OF PHYCOERYTHRIN 545 FROM THE MARINE CRYPTOPHYTE RHODOMONAS CS24                                                        | PHOTOSYNTHESIS                 |
| 1XG2 | CRYSTAL STRUCTURE OF THE COMPLEX BETWEEN PECTIN METHYLESTERASE AND ITS INHIBITOR PROTEIN                                                                  | HYDROLASE/HYDROLASE INHIBITOR  |
| 1XGP | STRUCTURE FOR ANTIBODY HYHEL-63 Y33A MUTANT COMPLEXED WITH HEN EGG LYSOZYME                                                                               | IMMUNE SYSTEM                  |
| 1XGQ | STRUCTURE FOR ANTIBODY HYHEL-63 Y33V MUTANT COMPLEXED WITH HEN EGG LYSOZYME                                                                               | IMMUNE SYSTEM                  |
| 1XGR | STRUCTURE FOR ANTIBODY HYHEL-63 Y33I MUTANT COMPLEXED WITH HEN EGG LYSOZYME                                                                               | IMMUNE SYSTEM                  |
| 1XGT | STRUCTURE FOR ANTIBODY HYHEL-63 Y33L MUTANT COMPLEXED WITH                                                                                                | IMMUNE SYSTEM                  |

## HEN EGG LYSOZYME

|      |                                                                                                                                       |                                   |
|------|---------------------------------------------------------------------------------------------------------------------------------------|-----------------------------------|
| 1XGU | STRUCTURE FOR ANTIBODY HYHEL-63 Y33F MUTANT COMPLEXED WITH HEN EGG LYSOZYME                                                           | IMMUNE SYSTEM                     |
| 1XGY | CRYSTAL STRUCTURE OF ANTI-META I RHODOPSIN FAB FRAGMENT K42-41L                                                                       | IMMUNE SYSTEM                     |
| 1XH3 | CONFORMATIONAL RESTRAINTS AND FLEXIBILITY OF 14-MERIC PEPTIDES IN COMPLEX WITH HLA-B*3501                                             | IMMUNE SYSTEM                     |
| 1XH4 | CRYSTAL STRUCTURES OF PROTEIN KINASE B SELECTIVE INHIBITORS IN COMPLEX WITH PROTEIN KINASE A AND MUTANTS                              | TRANSFERASE/TRANSFERASE INHIBITOR |
| 1XH5 | CRYSTAL STRUCTURES OF PROTEIN KINASE B SELECTIVE INHIBITORS IN COMPLEX WITH PROTEIN KINASE A AND MUTANTS                              | TRANSFERASE/TRANSFERASE INHIBITOR |
| 1XH6 | CRYSTAL STRUCTURES OF PROTEIN KINASE B SELECTIVE INHIBITORS IN COMPLEX WITH PROTEIN KINASE A AND MUTANTS                              | TRANSFERASE/TRANSFERASE INHIBITOR |
| 1XH7 | CRYSTAL STRUCTURES OF PROTEIN KINASE B SELECTIVE INHIBITORS IN COMPLEX WITH PROTEIN KINASE A AND MUTANTS                              | TRANSFERASE/TRANSFERASE INHIBITOR |
| 1XH8 | CRYSTAL STRUCTURES OF PROTEIN KINASE B SELECTIVE INHIBITORS IN COMPLEX WITH PROTEIN KINASE A AND MUTANTS                              | TRANSFERASE/TRANSFERASE INHIBITOR |
| 1XH9 | CRYSTAL STRUCTURES OF PROTEIN KINASE B SELECTIVE INHIBITORS IN COMPLEX WITH PROTEIN KINASE A AND MUTANTS                              | TRANSFERASE/TRANSFERASE INHIBITOR |
| 1XHA | CRYSTAL STRUCTURES OF PROTEIN KINASE B SELECTIVE INHIBITORS IN COMPLEX WITH PROTEIN KINASE A AND MUTANTS                              | TRANSFERASE/TRANSFERASE INHIBITOR |
| 1XHM | THE CRYSTAL STRUCTURE OF A BIOLOGICALLY ACTIVE PEPTIDE (SIGK) BOUND TO A G PROTEIN BETA:GAMMA HETERODIMER                             | SIGNALING PROTEIN                 |
| 1XIU | CRYSTAL STRUCTURE OF THE AGONIST-BOUND LIGAND-BINDING DOMAIN OF BIOMPHALARIA GLABRATA RXR                                             | TRANSCRIPTION/TRANSFERASE         |
| 1XJ7 | COMPLEX ANDROGEN RECEPTOR LBD AND RAC3 PEPTIDE                                                                                        | HORMONE/GROWTH FACTOR             |
| 1XJW | THE STRUCTURE OF E. COLI ASPARTATE TRANS-CARBAMOYLASE Q137A MUTANT IN THE R-STATE                                                     | TRANSFERASE/TRANSFERASE REGULATOR |
| 1XK4 | CRYSTAL STRUCTURE OF HUMAN CALPROTECTIN(S100A8/S100A9)                                                                                | METAL BINDING PROTEIN             |
| 1XKA | FACTOR XA COMPLEXED WITH A SYNTHETIC INHIBITOR FX-2212A, (2S)-(3'-AMIDINO-3-BIPHENYLYL)-5-(4-PYRIDYLAMINO)PENTANOIC ACID              | BLOOD COAGULATION FACTOR          |
| 1XKB | FACTOR XA COMPLEXED WITH A SYNTHETIC INHIBITOR FX-2212A, (2S)-(3'-AMIDINO-3-BIPHENYLYL)-5-(4-PYRIDYLAMINO)PENTANOIC ACID              | BLOOD COAGULATION FACTOR          |
| 1XKP | CRYSTAL STRUCTURE OF THE VIRULENCE FACTOR YOPN IN COMPLEX WITH ITS HETERODIMERIC CHAPERONE SYCN-YSCB                                  | MEMBRANE PROTEIN/CHAPERON         |
| 1XL3 | COMPLEX STRUCTURE OF Y. PESTIS VIRULENCE FACTORS YOPN AND TYEA                                                                        | CELL INVASION                     |
| 1XLS | CRYSTAL STRUCTURE OF THE MOUSE CAR/RXR LBD HETERODIMER BOUND TO TCPOBOP AND 9CRA AND A TIF2 PEPTIDE CONTAINING THE THIRD LXXLL MOTIFS | TRANSCRIPTION                     |
| 1XLT | CRYSTAL STRUCTURE OF TRANS-HYDROGENASE [(DOMAIN I)2:DOMAIN III] HETEROTRIMER COMPLEX                                                  | OXIDOREDUCTASE                    |



|      |                                                                                                                                                 |                              |
|------|-------------------------------------------------------------------------------------------------------------------------------------------------|------------------------------|
| 1XM4 | CATALYTIC DOMAIN OF HUMAN PHOSPHODIESTERASE 4B IN COMPLEX WITH PICLAMILAST                                                                      | HYDROLASE                    |
| 1XME | STRUCTURE OF RECOMBINANT CYTOCHROME BA3 OXIDASE FROM THERMUS THERMOPHILUS                                                                       | OXIDOREDUCTASE               |
| 1XMF | STRUCTURE OF MN(II)-SOAKED APO METHANE MONOOXYGENASE HYDROXYLASE CRYSTALS FROM M. CAPSULATUS (BATH)                                             | OXIDOREDUCTASE               |
| 1XMG | RYSTAL STRUCTURE OF APO METHANE MONOOXYGENASE HYDROXYLASE FROM M. CAPSULATUS (BATH)                                                             | OXIDOREDUCTASE               |
| 1XMH | STRUCTURE OF CO(II) RECONSTITUTED METHANE MONOOXYGENASE HYDROXYLASE FROM M. CAPSULATUS (BATH)                                                   | OXIDOREDUCTASE               |
| 1XMN | CRYSTAL STRUCTURE OF THROMBIN BOUND TO HEPARIN                                                                                                  | BLOOD CLOTTING               |
| 1XMO | RYSTAL STRUCTURE OF MNM5U34T6A37-TRNALYSUUU COMPLEXED WITH AAG-MRNA IN THE DECODING CENTER                                                      | RIBOSOME                     |
| 1XMQ | CRYSTAL STRUCTURE OF T6A37-ASLLYSUUU AAA-MRNA BOUND TO THE DECODING CENTER                                                                      | RIBOSOME                     |
| 1XMU | CATALYTIC DOMAIN OF HUMAN PHOSPHODIESTERASE 4B IN COMPLEX WITH ROFLUMILAST                                                                      | HYDROLASE                    |
| 1XMY | CATALYTIC DOMAIN OF HUMAN PHOSPHODIESTERASE 4B IN COMPLEX WITH (R)-ROLIPRAM                                                                     | HYDROLASE                    |
| 1XN2 | NEW SUBSTRATE BINDING POCKETS FOR BETA-SECRETASE.                                                                                               | HYDROLASE                    |
| 1XN3 | CRYSTAL STRUCTURE OF BETA-SECRETASE BOUND TO A LONG INHIBITOR WITH ADDITIONAL UPSTREAM RESIDUES.                                                | HYDROLASE                    |
| 1XNQ | STRUCTURE OF AN INOSINE-ADENINE WOBBLE BASE PAIR COMPLEX IN THE CONTEXT OF THE DECODING CENTER                                                  | RIBOSOME                     |
| 1XNR | CRYSTAL STRUCTURE OF AN INOSINE-CYTOSINE WOBBLE BASE PAIR IN THE CONTEXT OF THE DECODING CENTER                                                 | RIBOSOME                     |
| 1XO2 | CRYSTAL STRUCTURE OF A HUMAN CYCLIN-DEPENDENT KINASE 6 COMPLEX WITH A FLAVONOL INHIBITOR, Fisetin                                               | CELL CYCLE/TRANSFERASE       |
| 1XOF | HETEROOLIGOMERIC BETA BETA ALPHA MINIPROTEIN                                                                                                    | DE NOVO PROTEIN              |
| 1XOU | CRYSTAL STRUCTURE OF THE CESA-ESPA COMPLEX                                                                                                      | STRUCTURAL PROTEIN/CHAPERONE |
| 1XOW | CRYSTAL STRUCTURE OF THE HUMAN ANDROGEN RECEPTOR LIGAND BINDING DOMAIN BOUND WITH AN ANDROGEN RECEPTOR NH2-TERMINAL PEPTIDE, AR20-30, AND R1881 | TRANSCRIPTION                |
| 1XPK | RYSTAL STRUCTURE OF STAPHYLOCOCCUS AUREUS HMG-COA SYNTHASE WITH HMG-COA AND WITH ACETOACETYL-COA AND ACETYLATED CYSTEINE                        | TRANSFERASE                  |
| 1XQ5 | MET-PERCH HEMOGLOBIN AT 1.9A                                                                                                                    | OXYGEN STORAGE/TRANSPORT     |
| 1XQ7 | CYCLOPHILIN FROM TRYPANOSOMA CRUZI BOUND TO CYCLOSPORIN A                                                                                       | ISOMERASE                    |
| 1XQH | CRYSTAL STRUCTURE OF A TERNARY COMPLEX OF THE METHYLTRANSFERASE SET9 (ALSO KNOWN AS SET7/9) WITH A P53 PEPTIDE AND SAH                          | TRANSFERASE                  |
| 1XQS | CRYSTAL STRUCTURE OF THE HSPBP1 CORE DOMAIN COMPLEXED WITH                                                                                      | CHAPERONE                    |

## THE FRAGMENT OF HSP70 ATPASE DOMAIN

|      |                                                                                                                                       |                                          |
|------|---------------------------------------------------------------------------------------------------------------------------------------|------------------------------------------|
| 1XQY | CRYSTAL STRUCTURE OF F1-MUTANT S105A COMPLEX WITH PRO-LEU-GLY-GLY                                                                     | HYDROLASE                                |
| 1XR0 | STRUCTURAL BASIS OF SNT PTB DOMAIN INTERACTIONS WITH DISTINCT NEUROTROPHIC RECEPTORS                                                  | SIGNALING PROTEIN/GROWTH FACTOR RECEPTOR |
| 1XR8 | CRYSTAL STRUCTURES OF HLA-B*1501 IN COMPLEX WITH PEPTIDES FROM HUMAN UBCH6 AND EPSTEIN-BARR VIRUS EBNA-3                              | IMMUNE SYSTEM                            |
| 1XRP | CRYSTAL STRUCTURE OF ACTIVE SITE F1-MUTANT E213Q SOAKED WITH PEPTIDE PRO-LEU-GLY-GLY                                                  | HYDROLASE                                |
| 1XRS | CRYSTAL STRUCTURE OF LYSINE 5,6-AMINOMUTASE IN COMPLEX WITH PLP, COBALAMIN, AND 5'-DEOXYADENOSINE                                     | ISOMERASE                                |
| 1XS9 | A MODEL OF THE TERNARY COMPLEX FORMED BETWEEN MARA, THE ALPHA-CTD OF RNA POLYMERASE AND DNA                                           | TRANSCRIPTION/DNA                        |
| 1XT9 | CRYSTAL STRUCTURE OF DEN1 IN COMPLEX WITH NEDD8                                                                                       | HYDROLASE/HYDROLASE INHIBITOR            |
| 1XTC | CHOLERA TOXIN                                                                                                                         | TOXIN                                    |
| 1XTG | CRYSTAL STRUCTURE OF NEUROTOXIN BONT/A COMPLEXED WITH SYNAPTOSOMAL-ASSOCIATED PROTEIN 25                                              | TOXIN                                    |
| 1XU2 | THE CRYSTAL STRUCTURE OF APRIL BOUND TO BCMA                                                                                          | CYTOKINE, HORMONE/GROWTH FACTOR RECEPTOR |
| 1XU3 | SOLUBLE METHANE MONOOXYGENASE HYDROXYLASE-SOAKED WITH BROMOPHENOL                                                                     | OXIDOREDUCTASE                           |
| 1XU5 | SOLUBLE METHANE MONOOXYGENASE HYDROXYLASE-PHENOL SOAKED                                                                               | OXIDOREDUCTASE                           |
| 1XV9 | CRYSTAL STRUCTURE OF CAR/RXR HETERODIMER BOUND WITH SRC1 PEPTIDE, FATTY ACID, AND 5 $\beta$ -PREGNANE-3,20-DIONE.                     | DNA BINDING PROTEIN                      |
| 1XVB | SOLUBLE METHANE MONOOXYGENASE HYDROXYLASE: 6-BROMOHEXANOL SOAKED STRUCTURE                                                            | OXIDOREDUCTASE                           |
| 1XVC | SOLUBLE METHANE MONOOXYGENASE HYDROXYLASE: 8-BROMOOCTANOL SOAKED STRUCTURE                                                            | OXIDOREDUCTASE                           |
| 1XVD | SOLUBLE METHANE MONOOXYGENASE HYDROXYLASE: 4-FLUOROPHENOL SOAKED STRUCTURE                                                            | OXIDOREDUCTASE                           |
| 1XVE | SOLUBLE METHANE MONOOXYGENASE HYDROXYLASE: 3-BROMO-3-BUTENOL SOAKED STRUCTURE                                                         | OXIDOREDUCTASE                           |
| 1XVF | SOLUBLE METHANE MONOOXYGENASE HYDROXYLASE: CHLOROPROPANOL SOAKED STRUCTURE                                                            | OXIDOREDUCTASE                           |
| 1XVG | SOLUBLE METHANE MONOOXYGENASE HYDROXYLASE: BROMOETHANOL SOAKED STRUCTURE                                                              | OXIDOREDUCTASE                           |
| 1XVM | TRYPsin FROM FUSARIUM OXYSPORUM- ROOM TEMPERATURE TO ATOMIC RESOLUTION                                                                | HYDROLASE                                |
| 1XVP | CRYSTAL STRUCTURE OF CAR/RXR HETERODIMER BOUND WITH SRC1 PEPTIDE, FATTY ACID AND CITCO                                                | DNA BINDING PROTEIN                      |
| 1XW7 | DIABETES-ASSOCIATED MUTATIONS IN HUMAN INSULIN: CRYSTAL STRUCTURE AND PHOTO-CROSS-LINKING STUDIES OF A-CHAIN VARIANT INSULIN WAKAYAMA | HORMONE/GROWTH FACTOR                    |

|      |                                                                                                                                                                                         |                                    |
|------|-----------------------------------------------------------------------------------------------------------------------------------------------------------------------------------------|------------------------------------|
| 1XWD | CRYSTAL STRUCTURE OF HUMAN FOLLICLE STIMULATING HORMONE COMPLEXED WITH ITS RECEPTOR                                                                                                     | HORMONE/GROWTH FACTOR              |
| 1XWJ | VINCULIN HEAD (1-258) IN COMPLEX WITH THE TALIN VINCULIN BINDING SITE 3 (1945-1969)                                                                                                     | CELL ADHESION/PROTEIN BINDING      |
| 1XX9 | CRYSTAL STRUCTURE OF THE FXIA CATALYTIC DOMAIN IN COMPLEX WITH ECOTINM84R                                                                                                               | BLOOD CLOTTING/HYDROLASE INHIBITOR |
| 1XXD | CRYSTAL STRUCTURE OF THE FXIA CATALYTIC DOMAIN IN COMPLEX WITH MUTATED ECOTIN                                                                                                           | BLOOD CLOTTING/HYDROLASE INHIBITOR |
| 1XXF | CRYSTAL STRUCTURE OF THE FXIA CATALYTIC DOMAIN IN COMPLEX WITH ECOTIN MUTANT (ECOTINP)                                                                                                  | BLOOD CLOTTING/HYDROLASE INHIBITOR |
| 1XXH | ATPGS BOUND E. COLI CLAMP LOADER COMPLEX                                                                                                                                                | TRANSFERASE                        |
| 1XXI | ADP BOUND E. COLI CLAMP LOADER COMPLEX                                                                                                                                                  | TRANSFERASE                        |
| 1XXM | THE MODULAR ARCHITECTURE OF PROTEIN-PROTEIN BINDING SITE                                                                                                                                | HYDROLASE/HYDROLASE INHIBITOR      |
| 1XXP | YERSINIA YOPH (RESIDUES 163-468) C403S BINDS PHOSPHOTYROSYL PEPTIDE AT TWO SITES                                                                                                        | HYDROLASE                          |
| 1XXT | THE T-TO-T HIGH TRANSITIONS IN HUMAN HEMOGLOBIN: WILD-TYPE DEOXY HB A (LOW SALT, ONE TEST SET)                                                                                          | TRANSPORT PROTEIN                  |
| 1XXV | YERSINIA YOPH (RESIDUES 163-468) BINDS PHOSPHONODIFLUOROMETHYL-PHE CONTAINING HEXAPEPTIDE AT TWO SITES                                                                                  | HYDROLASE                          |
| 1XXW | STRUCTURE OF ZINC INDUCED HETERODIMER OF TWO CALCIUM FREE ISOFORMS OF PHOSPHOLIPASE A2 FROM NAJA NAJA SAGITTIFERA AT 2.7A RESOLUTION                                                    | HYDROLASE                          |
| 1XY0 | T-TO-THIGH TRANSITIONS IN HUMAN HEMOGLOBIN: ALPHAK40G DEOXY LOW-SALT                                                                                                                    | TRANSPORT PROTEIN                  |
| 1XYE | T-TO-THIGH TRANSITIONS IN HUMAN HEMOGLOBIN: ALPHA Y42A DEOXY LOW SALT                                                                                                                   | TRANSPORT PROTEIN                  |
| 1XZ0 | CRYSTAL STRUCTURE OF CD1A IN COMPLEX WITH A SYNTHETIC MYCOBACTIN LIPOPEPTIDE                                                                                                            | IMMUNE SYSTEM                      |
| 1XZ2 | WILD-TYPE HEMOGLOBIN DEOXY NO-SALT                                                                                                                                                      | TRANSPORT PROTEIN                  |
| 1XZ4 | INTERSUBUNIT INTERACTIONS ASSOCIATED WITH TYR42ALPHA STABILIZE THE QUATERNARY-T TETRAMER BUT ARE NOT MAJOR QUATERNARY CONSTRAINTS IN DEOXYHEMOGLOBIN: ALPHAY42A DEOXYHEMOGLOBIN NO-SALT | TRANSPORT PROTEIN                  |
| 1XZ5 | T-TO-THIGH QUATERNARY TRANSITIONS IN HUMAN HEMOGLOBIN: ALPHAL91A DEOXY LOW-SALT                                                                                                         | TRANSPORT PROTEIN                  |
| 1XZ7 | T-TO-THIGH QUATERNARY TRANSITIONS IN HUMAN HEMOGLOBIN: ALPHAR92A DEOXY LOW-SALT                                                                                                         | TRANSPORT PROTEIN                  |
| 1XZP | STRUCTURE OF THE GTP-BINDING PROTEIN TRME FROM THERMOTOGA MARITIMA                                                                                                                      | HYDROLASE                          |
| 1XZQ | STRUCTURE OF THE GTP-BINDING PROTEIN TRME FROM THERMOTOGA MARITIMA COMPLEXED WITH 5-FORMYL-THF                                                                                          | HYDROLASE                          |
| 1XZU | T-TO-THIGH QUATERNARY TRANSITIONS IN HUMAN HEMOGLOBIN: ALPHAD94G DEOXY LOW-SALT                                                                                                         | TRANSPORT PROTEIN                  |

|      |                                                                                                                                           |                                       |
|------|-------------------------------------------------------------------------------------------------------------------------------------------|---------------------------------------|
| 1XZV | T-TO-THIGH QUATERNARY TRANSITIONS IN HUMAN HEMOGLOBIN:<br>ALPHAP95A DEOXY LOW-SALT                                                        | TRANSPORT PROTEIN                     |
| 1Y01 | CRYSTAL STRUCTURE OF AHSP BOUND TO FE(II) ALPHA-HEMOGLOBIN                                                                                | OXYGEN STORAGE/TRANSPORT              |
| 1Y09 | T-TO-T(HIGH) QUATERNARY TRANSITIONS IN HUMAN HEMOGLOBIN:<br>ALPHAN97A DEOXY LOW-SALT                                                      | TRANSPORT PROTEIN                     |
| 1Y0A | T-TO-THIGH QUATERNARY TRANSITIONS IN HUMAN HEMOGLOBIN:<br>ALPHAY140A DEOXY LOW-SALT                                                       | TRANSPORT PROTEIN                     |
| 1Y0C | T-TO-THIGH QUATERNARY TRANSITIONS IN HUMAN HEMOGLOBIN:<br>ALPHAY140F DEOXY LOW-SALT                                                       | TRANSPORT PROTEIN                     |
| 1Y0D | T-TO-THIGH QUATERNARY TRANSITIONS IN HUMAN HEMOGLOBIN:<br>DESARG141ALPHA DEOXY LOW-SALT                                                   | TRANSPORT PROTEIN                     |
| 1Y0L | CATALYTIC ELIMINATION ANTIBODY 34E4 IN COMPLEX WITH HAPTEN                                                                                | IMMUNE SYSTEM                         |
| 1Y0T | T-TO-T(HIGH) QUATERNARY TRANSITIONS IN HUMAN HEMOGLOBIN:<br>BETAV1M DEOXY LOW-SALT (1 TEST SET)                                           | TRANSPORT PROTEIN                     |
| 1Y0V | CRYSTAL STRUCTURE OF ANTHRAX EDEMA FACTOR (EF) IN COMPLEX<br>WITH CALMODULIN AND PYROPHOSPHATE                                            | LYASE                                 |
| 1Y0W | T-TO-THIGH QUATERNARY TRANSITIONS IN HUMAN HEMOGLOBIN:<br>BETAV1M DEOXY LOW-SALT (10 TEST SETS)                                           | TRANSPORT PROTEIN                     |
| 1Y14 | CRYSTAL STRUCTURE OF YEAST SUBCOMPLEX OF RPB4 AND RPB7                                                                                    | TRANSFERASE                           |
| 1Y17 | CRYSTAL STRUCTURE OF AA-X-BP-II, A SNAKE VENOM PROTEIN WITH<br>THE ACTIVITY OF BINDING TO COAGULATION FACTOR X FROM<br>AGKISTRODON ACUTUS | BLOOD CLOTTING                        |
| 1Y18 | FAB FRAGMENT OF CATALYTIC ELIMINATION ANTIBODY 34E4 E(H50)D<br>MUTANT IN COMPLEX WITH HAPTEN                                              | IMMUNE SYSTEM                         |
| 1Y19 | STRUCTURAL BASIS FOR PHOSPHATIDYLINOSITOL PHOSPHATE KINASE<br>TYPE I-GAMMA BINDING TO TALIN AT FOCAL ADHESIONS                            | STRUCTURAL PROTEIN, SIGNALING PROTEIN |
| 1Y1K | CRYSTAL STRUCTURE OF THE COMPLEX OF SUBTILISIN BPN' WITH<br>CHYMOTRYPSIN INHIBITOR 2 T58A MUTANT                                          | HYDROLASE/HYDROLASE INHIBITOR         |
| 1Y1V | REFINED RNA POLYMERASE II-TFIIIS COMPLEX                                                                                                  | TRANSFERASE/TRANSCRIPTION             |
| 1Y1W | COMPLETE RNA POLYMERASE II ELONGATION COMPLEX                                                                                             | TRANSFERASE/DNA/RNA                   |
| 1Y22 | T-TO-T(HIGH) QUATERNARY TRANSITIONS IN HUMAN HEMOGLOBIN:<br>BETAV33A DEOXY LOW-SALT (1 TEST SET)                                          | TRANSPORT PROTEIN                     |
| 1Y2A | STRUCTURE OF MAMMALIAN IMPORTIN BOUND TO THE NON-CLASSICAL<br>PLSCR1-NLS                                                                  | PROTEIN TRANSPORT                     |
| 1Y2Z | T-TO-T(HIGH) QUATERNARY TRANSITIONS IN HUMAN HEMOGLOBIN:<br>BETAV34G DEOXY LOW-SALT (1 TEST SET)                                          | TRANSPORT PROTEIN                     |
| 1Y31 | T-TO-T(HIGH) QUATERNARY TRANSITIONS IN HUMAN HEMOGLOBIN:<br>BETAY35A DEOXY LOW-SALT (1 TEST SET)                                          | TRANSPORT PROTEIN                     |
| 1Y33 | CRYSTAL STRUCTURE OF THE COMPLEX OF SUBTILISIN BPN' WITH<br>CHYMOTRYPSIN INHIBITOR 2 T58P MUTANT                                          | HYDROLASE/HYDROLASE INHIBITOR         |
| 1Y34 | CRYSTAL STRUCTURE OF THE COMPLEX OF SUBTILISIN BPN' WITH<br>CHYMOTRYPSIN INHIBITOR 2 E60A MUTANT                                          | HYDROLASE/HYDROLASE INHIBITOR         |

|      |                                                                                                              |                               |
|------|--------------------------------------------------------------------------------------------------------------|-------------------------------|
| 1Y35 | T-TO-T(HIGH) QUATERNARY TRANSITIONS IN HUMAN HEMOGLOBIN: BETAY35F DEOXY LOW-SALT (1 TEST SET)                | TRANSPORT PROTEIN             |
| 1Y3A | STRUCTURE OF G-ALPHA-II BOUND TO A GDP-SELECTIVE PEPTIDE PROVIDES INSIGHT INTO GUANINE NUCLEOTIDE EXCHANGE   | SIGNALING PROTEIN             |
| 1Y3B | CRYSTAL STRUCTURE OF THE COMPLEX OF SUBTILISIN BPN' WITH CHYMOTRYPSIN INHIBITOR 2 E60S MUTANT                | HYDROLASE/HYDROLASE INHIBITOR |
| 1Y3C | CRYSTAL STRUCTURE OF THE COMPLEX OF SUBTILISIN BPN' WITH CHYMOTRYPSIN INHIBITOR 2 R62A MUTANT                | HYDROLASE/HYDROLASE INHIBITOR |
| 1Y3D | CRYSTAL STRUCTURE OF THE COMPLEX OF SUBTILISIN BPN' WITH CHYMOTRYPSIN INHIBITOR 2 R67A MUTANT                | HYDROLASE/HYDROLASE INHIBITOR |
| 1Y3F | CRYSTAL STRUCTURE OF THE COMPLEX OF SUBTILISIN BPN' WITH CHYMOTRYPSIN INHIBITOR 2 F69A MUTANT                | HYDROLASE/HYDROLASE INHIBITOR |
| 1Y45 | T-TO-T(HIGH) QUATERNARY TRANSITIONS IN HUMAN HEMOGLOBIN: BETAP36A DEOXY LOW-SALT (10 TEST SETS)              | TRANSPORT PROTEIN             |
| 1Y46 | T-TO-T(HIGH) QUATERNARY TRANSITIONS IN HUMAN HEMOGLOBIN: BETAW37Y DEOXY LOW-SALT (10 TEST SETS)              | TRANSPORT PROTEIN             |
| 1Y48 | CRYSTAL STRUCTURE OF THE COMPLEX OF SUBTILISIN BPN' WITH CHYMOTRYPSIN INHIBITOR 2 R65A MUTANT                | HYDROLASE/HYDROLASE INHIBITOR |
| 1Y4A | CRYSTAL STRUCTURE OF THE COMPLEX OF SUBTILISIN BPN' WITH CHYMOTRYPSIN INHIBITOR 2 M59R/E60S MUTANT           | HYDROLASE/HYDROLASE INHIBITOR |
| 1Y4B | T-TO-T(HIGH) QUATERNARY TRANSITIONS IN HUMAN HEMOGLOBIN: BETAW37H DEOXY LOW-SALT (10 TEST SETS)              | TRANSPORT PROTEIN             |
| 1Y4D | CRYSTAL STRUCTURE OF THE COMPLEX OF SUBTILISIN BPN' WITH CHYMOTRYPSIN INHIBITOR 2 M59R/E60S MUTANT           | HYDROLASE/HYDROLASE INHIBITOR |
| 1Y4F | T-TO-T(HIGH) QUATERNARY TRANSITIONS IN HUMAN HEMOGLOBIN: BETAW37A DEOXY LOW-SALT (10 TEST SETS)              | TRANSPORT PROTEIN             |
| 1Y4G | T-TO-T(HIGH) QUATERNARY TRANSITIONS IN HUMAN HEMOGLOBIN: BETAW37G DEOXY LOW-SALT (10 TEST SETS)              | TRANSPORT PROTEIN             |
| 1Y4H | WILD TYPE STAPHOPAIN-STAPHOSTATIN COMPLEX                                                                    | HYDROLASE/HYDROLASE INHIBITOR |
| 1Y4P | T-TO-T(HIGH) QUATERNARY TRANSITIONS IN HUMAN HEMOGLOBIN: BETAW37E DEOXY LOW-SALT (10 TEST SETS)              | TRANSPORT PROTEIN             |
| 1Y4Q | T-TO-T(HIGH) QUATERNARY TRANSITIONS IN HUMAN HEMOGLOBIN: BETAF42A DEOXY LOW-SALT (1 TEST SET)                | TRANSPORT PROTEIN             |
| 1Y4R | T-TO-T(HIGH) QUATERNARY TRANSITIONS IN HUMAN HEMOGLOBIN: BETAF45A DEOXY LOW-SALT (1 TEST SET)                | TRANSPORT PROTEIN             |
| 1Y4V | T-TO-T(HIGH) QUATERNARY TRANSITIONS IN HUMAN HEMOGLOBIN: BETAC93A DEOXY LOW-SALT (1 TEST SET)                | TRANSPORT PROTEIN             |
| 1Y4Z | THE CRYSTAL STRUCTURE OF NITRATE REDUCTASE A, NARGHI, IN COMPLEX WITH THE Q-SITE INHIBITOR PENTACHLOROPHENOL | OXIDOREDUCTASE                |
| 1Y56 | CRYSTAL STRUCTURE OF L-PROLINE DEHYDROGENASE FROM PHORIKOSHII                                                | OXIDOREDUCTASE                |
| 1Y5F | T-TO-T(HIGH) QUATERNARY TRANSITIONS IN HUMAN HEMOGLOBIN: BETAL96A DEOXY LOW-SALT (1 TEST SET)                | TRANSPORT PROTEIN             |

|      |                                                                                                                                                  |                          |
|------|--------------------------------------------------------------------------------------------------------------------------------------------------|--------------------------|
| 1Y5I | THE CRYSTAL STRUCTURE OF THE NARGHI MUTANT NARI-K86A                                                                                             | OXIDOREDUCTASE           |
| 1Y5J | T-TO-T(HIGH) QUATERNARY TRANSITIONS IN HUMAN HEMOGLOBIN: BETAH97A DEOXY LOW-SALT (1 TEST SET)                                                    | TRANSPORT PROTEIN        |
| 1Y5K | T-TO-T(HIGH) QUATERNARY TRANSITIONS IN HUMAN HEMOGLOBIN: BETAD99A DEOXY LOW-SALT (10 TEST SETS)                                                  | TRANSPORT PROTEIN        |
| 1Y5L | THE CRYSTAL STRUCTURE OF THE NARGHI MUTANT NARI-H66Y                                                                                             | OXIDOREDUCTASE           |
| 1Y5N | THE CRYSTAL STRUCTURE OF THE NARGHI MUTANT NARI-K86A IN COMPLEX WITH PENTACHLOROPHENOL                                                           | OXIDOREDUCTASE           |
| 1Y64 | BNI1P FORMIN HOMOLOGY 2 DOMAIN COMPLEXED WITH ATP-ACTIN                                                                                          | STRUCTURAL PROTEIN       |
| 1Y6K | CRYSTAL STRUCTURE OF HUMAN IL-10 COMPLEXED WITH THE SOLUBLE IL-10R1 CHAIN                                                                        | IMMUNE SYSTEM            |
| 1Y6M | CRYSTAL STRUCTURE OF EPSTEIN-BARR VIRUS IL-10 COMPLEXED WITH THE SOLUBLE IL-10R1 CHAIN                                                           | IMMUNE SYSTEM            |
| 1Y6N | CRYSTAL STRUCTURE OF EPSTEIN-BARR VIRUS IL-10 MUTANT (A87I) COMPLEXED WITH THE SOLUBLE IL-10R1 CHAIN                                             | IMMUNE SYSTEM            |
| 1Y75 | A NEW FORM OF CATALYTICALLY INACTIVE PHOSPHOLIPASE A2 WITH AN UNUSUAL DISULPHIDE BRIDGE CYS 32- CYS 49 REVEALS RECOGNITION FOR N-ACETYLGUCOSMINE | HYDROLASE                |
| 1Y77 | COMPLETE RNA POLYMERASE II ELONGATION COMPLEX WITH SUBSTRATE ANALOGUE GMPCPP                                                                     | TRANSFERASE/DNA/RNA      |
| 1Y7C | T-TO-T(HIGH) QUATERNARY TRANSITIONS IN HUMAN HEMOGLOBIN: BETAP100A DEOXY LOW-SALT (1 TEST SET)                                                   | TRANSPORT PROTEIN        |
| 1Y7D | T-TO-T(HIGH) QUATERNARY TRANSITIONS IN HUMAN HEMOGLOBIN: BETAP100G DEOXY LOW-SALT (1 TEST SET)                                                   | TRANSPORT PROTEIN        |
| 1Y7G | T-TO-T(HIGH) QUATERNARY TRANSITIONS IN HUMAN HEMOGLOBIN: BETAN102A DEOXY LOW-SALT (1 TEST SET)                                                   | TRANSPORT PROTEIN        |
| 1Y7L | O-ACETYLSERINE SULFHYDRYLASE COMPLEX                                                                                                             | TRANSFERASE              |
| 1Y7Z | T-TO-T(HIGH) QUATERNARY TRANSITIONS IN HUMAN HEMOGLOBIN: BETAN108A DEOXY LOW-SALT (1 TEST SET)                                                   | TRANSPORT PROTEIN        |
| 1Y83 | T-TO-T(HIGH) QUATERNARY TRANSITIONS IN HUMAN HEMOGLOBIN: BETAY145G DEOXY LOW-SALT (1 TEST SET)                                                   | TRANSPORT PROTEIN        |
| 1Y85 | T-TO-T(HIGH) QUATERNARY TRANSITIONS IN HUMAN HEMOGLOBIN: DESHIS146BETA DEOXY LOW-SALT                                                            | TRANSPORT PROTEIN        |
| 1Y8H | HORSE METHEMOGLOBIN LOW SALT, PH 7.0                                                                                                             | OXYGEN STORAGE/TRANSPORT |
| 1Y8I | HORSE METHEMOGLOBIN LOW SALT, PH 7.0 (98% RELATIVE HUMIDITY)                                                                                     | OXYGEN STORAGE/TRANSPORT |
| 1Y8K | HORSE METHEMOGLOBIN LOW SALT, PH 7.0 (88% RELATIVE HUMIDITY)                                                                                     | OXYGEN STORAGE/TRANSPORT |
| 1Y8N | CRYSTAL STRUCTURE OF THE PDK3-L2 COMPLEX                                                                                                         | TRANSFERASE              |
| 1Y8O | CRYSTAL STRUCTURE OF THE PDK3-L2 COMPLEX                                                                                                         | TRANSFERASE              |
| 1Y8P | CRYSTAL STRUCTURE OF THE PDK3-L2 COMPLEX                                                                                                         | TRANSFERASE              |
| 1Y8Q | SUMO E1 ACTIVATING ENZYME SAE1-SAE2-MG-ATP COMPLEX                                                                                               | LIGASE                   |

|      |                                                                                                                                                                                    |                                         |
|------|------------------------------------------------------------------------------------------------------------------------------------------------------------------------------------|-----------------------------------------|
| 1Y8R | SUMO E1 ACTIVATING ENZYME SAE1-SAE2-SUMO1-MG-ATP COMPLEX                                                                                                                           | LIGASE                                  |
| 1Y8W | T-TO-T(HIGH) QUATERNARY TRANSITIONS IN HUMAN HEMOGLOBIN: ALPHAR92A OXY (2MM IHP, 20% PEG) (10 TEST SETS)                                                                           | TRANSPORT PROTEIN                       |
| 1Y8X | STRUCTURAL BASIS FOR RECRUITMENT OF UBC12 BY AN E2-BINDING DOMAIN IN NEDD8'S E1                                                                                                    | LIGASE                                  |
| 1Y96 | CRYSTAL STRUCTURE OF THE GEMIN6/GEMIN7 HETERODIMER FROM THE HUMAN SMN COMPLEX                                                                                                      | RNA BINDING PROTEIN                     |
| 1Y98 | STRUCTURE OF THE BRCT REPEATS OF BRCA1 BOUND TO A CTIP PHOSPHOPEPTIDE.                                                                                                             | ANTITUMOR PROTEIN                       |
| 1YA7 | IMPLICATIONS FOR INTERACTIONS OF PROTEASOME WITH PAN AND PA700 FROM THE 1.9 A STRUCTURE OF A PROTEASOME-11S ACTIVATOR COMPLEX                                                      | HYDROLASE/HYDROLASE ACTIVATOR           |
| 1YAG | STRUCTURE OF THE YEAST ACTIN-HUMAN GELSOLIN SEGMENT 1 COMPLEX                                                                                                                      | CONTRACTILE PROTEIN                     |
| 1YAR | STRUCTURE OF ARCHEABACTERIAL 20S PROTEASOME MUTANT D9S-PA26 COMPLEX                                                                                                                | HYDROLASE/HYDROLASE ACTIVATOR           |
| 1YAU | STRUCTURE OF ARCHEABACTERIAL 20S PROTEASOME- PA26 COMPLEX                                                                                                                          | HYDROLASE/HYDROLASE ACTIVATOR           |
| 1YBO | CRYSTAL STRUCTURE OF THE PDZ TANDEM OF HUMAN SYNTENIN WITH SYNDECAN PEPTIDE                                                                                                        | STRUCTURAL PROTEIN                      |
| 1YBQ | CRYSTAL STRUCTURE OF ESCHERICHIA COLI ISOASPARTYL DIPEPTIDASE MUTANT D285N COMPLEXED WITH BETA-ASPARTYLHISTIDINE                                                                   | HYDROLASE                               |
| 1YC5 | SIR2-P53 PEPTIDE-NICOTINAMIDE                                                                                                                                                      | HYDROLASE                               |
| 1YCP | THE CRYSTAL STRUCTURE OF FIBRINOGEN-AA PEPTIDE 1-23 (F8Y) BOUND TO BOVINE THROMBIN EXPLAINS WHY THE MUTATION OF PHE-8 TO TYROSINE STRONGLY INHIBITS NORMAL CLEAVAGE AT ARGinine-16 | COMPLEX (SERINE PROTEASE/PEPTIDE)       |
| 1YCQ | XENOPUS LAEVIS MDM2 BOUND TO THE TRANSACTIVATION DOMAIN OF HUMAN P53                                                                                                               | COMPLEX (ONCOGENE PROTEIN/PEPTIDE)      |
| 1YCR | MDM2 BOUND TO THE TRANSACTIVATION DOMAIN OF P53                                                                                                                                    | COMPLEX (ONCOGENE PROTEIN/PEPTIDE)      |
| 1YCS | P53-53BP2 COMPLEX                                                                                                                                                                  | COMPLEX (ANTI-ONCOGENE/ANKYRIN REPEATS) |
| 1YD8 | COMPLEX OF HUMAN GGA3 GAT DOMAIN AND UBIQUITIN                                                                                                                                     | PROTEIN TRANSPORT, CHROMOSOMAL PROTEIN  |
| 1YDI | HUMAN VINCULIN HEAD DOMAIN (VH1, 1-258) IN COMPLEX WITH HUMAN ALPHA-ACTININ'S VINCULIN-BINDING SITE (RESIDUES 731-760)                                                             | CELL ADHESION, STRUCTURAL PROTEIN       |
| 1YDP | 1.9A CRYSTAL STRUCTURE OF HLA-G                                                                                                                                                    | IMMUNE SYSTEM                           |
| 1YDR | STRUCTURE OF CAMP-DEPENDENT PROTEIN KINASE, ALPHA-CATALYTIC SUBUNIT IN COMPLEX WITH H7 PROTEIN KINASE INHIBITOR 1-(5-ISOQUINOLINESULFONYL)-2-METHYLPYPERAZINE                      | COMPLEX (PHOSPHOTRANSFERASE/INHIBITOR)  |
| 1YDS | STRUCTURE OF CAMP-DEPENDENT PROTEIN KINASE, ALPHA-CATALYTIC SUBUNIT IN COMPLEX WITH H8 PROTEIN KINASE INHIBITOR [N-(2-METHYLAMINO)ETHYL]-5-ISOQUINOLINESULFONAMIDE                 | COMPLEX (PHOSPHOTRANSFERASE/INHIBITOR)  |
| 1YDT | STRUCTURE OF CAMP-DEPENDENT PROTEIN KINASE, ALPHA-CATALYTIC                                                                                                                        | COMPLEX (PHOSPHOTRANSFERASE/INHIBITOR)  |

## SUBUNIT IN COMPLEX WITH H89 PROTEIN KINASE INHIBITOR N-[2-(4-BROMOCINNAMYLAMINO)ETHYL]-5-ISOQUINOLINE

|      |                                                                                                                                           |                                  |
|------|-------------------------------------------------------------------------------------------------------------------------------------------|----------------------------------|
| 1YDZ | T-TO-T(HIGH) QUATERNARY TRANSITIONS IN HUMAN HEMOGLOBIN: ALPHAY140F OXY (2MM IHP, 20% PEG) (1 TEST SET)                                   | TRANSPORT PROTEIN                |
| 1YE0 | T-TO-T(HIGH) QUATERNARY TRANSITIONS IN HUMAN HEMOGLOBIN: BETAV33A OXY (2MM IHP, 20% PEG) (1 TEST SET)                                     | TRANSPORT PROTEIN                |
| 1YE1 | T-TO-T(HIGH) QUATERNARY TRANSITIONS IN HUMAN HEMOGLOBIN: BETAY35A OXY (2MM IHP, 20% PEG) (1 TEST SET)                                     | TRANSPORT PROTEIN                |
| 1YE2 | T-TO-T(HIGH) QUATERNARY TRANSITIONS IN HUMAN HEMOGLOBIN: BETAY35F OXY (2MM IHP, 20% PEG) (1 TEST SET)                                     | TRANSPORT PROTEIN                |
| 1YE9 | CRYSTAL STRUCTURE OF PROTEOLYTICALLY TRUNCATED CATALASE HPII FROM E. COLI                                                                 | OXIDOREDUCTASE                   |
| 1YEC | STRUCTURE OF A CATALYTIC ANTIBODY IGG2A FAB FRAGMENT (D2.3)                                                                               | CATALYTIC ANTIBODY               |
| 1YED | STRUCTURE OF A CATALYTIC ANTIBODY IGG2A FAB FRAGMENT (D2.4)                                                                               | CATALYTIC ANTIBODY               |
| 1YEE | STRUCTURE OF A CATALYTIC ANTIBODY, IGG2A FAB FRAGMENT (D2.5)                                                                              | CATALYTIC ANTIBODY               |
| 1YEF | STRUCTURE OF IGG2A FAB FRAGMENT (D2.3) COMPLEXED WITH SUBSTRATE ANALOGUE                                                                  | CATALYTIC ANTIBODY               |
| 1YEG | STRUCTURE OF IGG2A FAB FRAGMENT (D2.3) COMPLEXED WITH REACTION PRODUCT                                                                    | CATALYTIC ANTIBODY               |
| 1YEH | STRUCTURE OF IGG2A FAB FRAGMENT                                                                                                           | CATALYTIC ANTIBODY               |
| 1YEI | CATALYTIC ANTIBODY D2.3 COMPLEX                                                                                                           | IMMUNE SYSTEM                    |
| 1YEJ | CATALYTIC ANTIBODY COMPLEX                                                                                                                | IMMUNE SYSTEM                    |
| 1YEK | CATALYTIC ANTIBODY D2.3 COMPLEX                                                                                                           | IMMUNE SYSTEM                    |
| 1YEN | T-TO-T(HIGH) QUATERNARY TRANSITIONS IN HUMAN HEMOGLOBIN: BETAP36A OXY (2MM IHP, 20% PEG) (10 TEST SETS)                                   | TRANSPORT PROTEIN                |
| 1YEO | T-TO-T(HIGH) QUATERNARY TRANSITIONS IN HUMAN HEMOGLOBIN: BETAW37A OXY (10 TEST SETS)                                                      | TRANSPORT PROTEIN                |
| 1YEQ | T-TO-T(HIGH) QUATERNARY TRANSITIONS IN HUMAN HEMOGLOBIN: BETAW37Y OXY (10 TEST SETS)                                                      | TRANSPORT PROTEIN                |
| 1YEU | T-TO-T(HIGH) QUATERNARY TRANSITIONS IN HUMAN HEMOGLOBIN: BETAW37G OXY (10 TEST SETS)                                                      | TRANSPORT PROTEIN                |
| 1YEV | T-TO-T(HIGH) QUATERNARY TRANSITIONS IN HUMAN HEMOGLOBIN: BETAW37E OXY (10 TEST SETS)                                                      | TRANSPORT PROTEIN                |
| 1YEW | CRYSTAL STRUCTURE OF PARTICULATE METHANE MONOOXYGENASE                                                                                    | OXIDOREDUCTASE, MEMBRANE PROTEIN |
| 1YF4 | CRYSTAL STRUCTURE OF TRYPSIN-VASOPRESSIN COMPLEX                                                                                          | HYDROLASE/HORMONE/GROWTH FACTOR  |
| 1YF6 | STRUCTURE OF A QUINTUPLE MUTANT OF PHOTOSYNTHETIC REACTION CENTER FROM RHODOBACTER SPHAEROIDES                                            | PHOTOSYNTHESIS                   |
| 1YF8 | CRYSTAL STRUCTURE OF HIMALAYAN MISTLETOE RIP REVEALS THE PRESENCE OF A NATURAL INHIBITOR AND A NEW FUNCTIONALLY ACTIVE SUGAR-BINDING SITE | HYDROLASE                        |
| 1YFF | TRUCTURE OF HUMAN CARBONMONOXYHEMOGLOBIN C (BETA E6K): TWO                                                                                | OXYGEN STORAGE/TRANSPORT         |



## QUATERNARY STATES (R2 AND R3) IN ONE CRYSTAL

|      |                                                                                                                           |                                 |
|------|---------------------------------------------------------------------------------------------------------------------------|---------------------------------|
| 1YFN | VERSATILE MODES OF PEPTIDE RECOGNITION BY THE AAA+ ADAPTOR PROTEIN SSPB- THE CRYSTAL STRUCTURE OF A SSPB-RSEA COMPLEX     | PROTEIN BINDING                 |
| 1YG5 | T-TO-T(HIGH) QUATERNARY TRANSITIONS IN HUMAN HEMOGLOBIN: BETA W37H OXY (2MM IHP, 20% PEG) (10 TEST SETS)                  | TRANSPORT PROTEIN               |
| 1YGC | SHORT FACTOR VIIA WITH A SMALL MOLECULE INHIBITOR                                                                         | HYDROLASE                       |
| 1YGD | T-TO-T(HIGH) QUATERNARY TRANSITIONS IN HUMAN HEMOGLOBIN: BETA W37E ALPHA ZINC BETA OXY (10 TEST SETS)                     | TRANSPORT PROTEIN               |
| 1YGF | T-TO-T(HIGH) QUATERNARY TRANSITIONS IN HUMAN HEMOGLOBIN: BETA H97A OXY (2MM IHP, 20% PEG) (1 TEST SET)                    | TRANSPORT PROTEIN               |
| 1YGU | CRYSTAL STRUCTURE OF THE TANDEM PHOSPHATASE DOMAINS OF RPTP CD45 WITH A PTYR PEPTIDE                                      | HYDROLASE                       |
| 1YH9 | T-TO-T(HIGH) QUATERNARY TRANSITIONS IN HUMAN HEMOGLOBIN: HBA OXY (2MM IHP, 20% PEG) (10 TEST SETS)                        | TRANSPORT PROTEIN               |
| 1YHE | T-TO-T(HIGH) QUATERNARY TRANSITIONS IN HUMAN HEMOGLOBIN: HBA OXY (5.0MM IHP, 20% PEG) (10 TEST SETS)                      | TRANSPORT PROTEIN               |
| 1YHN | STRUCTURE BASIS OF RILP RECRUITMENT BY RAB7                                                                               | PROTEIN TRANSPORT               |
| 1YHQ | CRYSTAL STRUCTURE OF AZITHROMYCIN BOUND TO THE G2099A MUTANT 50S RIBOSOMAL SUBUNIT OF HALOARCUA MARISMORTUI               | RIBOSOME                        |
| 1YHR | T-TO-T(HIGH) QUATERNARY TRANSITIONS IN HUMAN HEMOGLOBIN: HBA OXY (10.0MM IHP, 20% PEG) (10 TEST SETS)                     | OXYGEN STORAGE/TRANSPORT        |
| 1YHU | CRYSTAL STRUCTURE OF RIFTIA PACHYPTILA C1 HEMOGLOBIN REVEALS NOVEL ASSEMBLY OF 24 SUBUNITS.                               | OXYGEN STORAGE/TRANSPORT        |
| 1YI2 | CRYSTAL STRUCTURE OF ERYTHROMYCIN BOUND TO THE G2099A MUTANT 50S RIBOSOMAL SUBUNIT OF HALOARCUA MARISMORTUI               | RIBOSOME                        |
| 1YI5 | CRYSTAL STRUCTURE OF THE A-COBRATOXIN-ACHBP COMPLEX                                                                       | TOXIN                           |
| 1YIE | T-TO-T(HIGH) QUATERNARY TRANSITIONS IN HUMAN HEMOGLOBIN: BETA W37A OXY (2.2MM IHP, 13% PEG) (1 TEST SET)                  | OXYGEN STORAGE/TRANSPORT        |
| 1YIH | T-TO-T(HIGH) QUATERNARY TRANSITIONS IN HUMAN HEMOGLOBIN: BETA P100A OXY (2.2MM IHP, 20% PEG) (1 TEST SET)                 | OXYGEN STORAGE/TRANSPORT        |
| 1YIJ | CRYSTAL STRUCTURE OF TELITHROMYCIN BOUND TO THE G2099A MUTANT 50S RIBOSOMAL SUBUNIT OF HALOARCUA MARISMORTUI              | RIBOSOME                        |
| 1YIT | CRYSTAL STRUCTURE OF VIRGINIAMYCIN M AND S BOUND TO THE 50S RIBOSOMAL SUBUNIT OF HALOARCUA MARISMORTUI                    | RIBOSOME                        |
| 1YJ5 | MOLECULAR ARCHITECTURE OF MAMMALIAN POLYNUCLEOTIDE KINASE, A DNA REPAIR ENZYME                                            | TRANSFERASE                     |
| 1YJ9 | CRYSTAL STRUCTURE OF THE MUTANT 50S RIBOSOMAL SUBUNIT OF HALOARCUA MARISMORTUI CONTAINING A THREE RESIDUE DELETION IN L22 | RIBOSOME                        |
| 1YJD | CRYSTAL STRUCTURE OF HUMAN CD28 IN COMPLEX WITH THE FAB FRAGMENT OF A MITOGENIC ANTIBODY (5.11A1)                         | IMMUNE SYSTEM/SIGNALING PROTEIN |
| 1YJN | CRYSTAL STRUCTURE OF CLINDAMYCIN BOUND TO THE G2099A MUTANT 50S RIBOSOMAL SUBUNIT OF HALOARCUA MARISMORTUI                | RIBOSOME                        |

|      |                                                                                                                                                                                           |                                |
|------|-------------------------------------------------------------------------------------------------------------------------------------------------------------------------------------------|--------------------------------|
| 1YJW | CRYSTAL STRUCTURE OF QUINUPRISTIN BOUND TO THE G2099A MUTANT 50S RIBOSOMAL SUBUNIT OF HALOARCUA MARISMORTUI                                                                               | RIBOSOME                       |
| 1YK0 | STRUCTURE OF NATRIURETIC PEPTIDE RECEPTOR-C COMPLEXED WITH ATRIAL NATRIURETIC PEPTIDE                                                                                                     | HORMONE/GROWTH FACTOR RECEPTOR |
| 1YK1 | STRUCTURE OF NATRIURETIC PEPTIDE RECEPTOR-C COMPLEXED WITH BRAIN NATRIURETIC PEPTIDE                                                                                                      | HORMONE/GROWTH FACTOR RECEPTOR |
| 1YKE | STRUCTURE OF THE MEDIATOR MED7/MED21 SUBCOMPLEX                                                                                                                                           | GENE REGULATION                |
| 1YKH | STRUCTURE OF THE MEDIATOR MED7/MED21 (MED7/SRB7) SUBCOMPLEX                                                                                                                               | GENE REGULATION                |
| 1YKK | PROTocatechuate 3,4-dioxygenase Y408C mutant                                                                                                                                              | OXIDOREDUCTASE                 |
| 1YKL | PROTocatechuate 3,4-dioxygenase Y408C mutant bound to DHB                                                                                                                                 | OXIDOREDUCTASE                 |
| 1YKM | PROTocatechuate 3,4-dioxygenase Y408E mutant                                                                                                                                              | OXIDOREDUCTASE                 |
| 1YKN | PROTocatechuate 3,4-dioxygenase Y408E mutant bound to DHB                                                                                                                                 | OXIDOREDUCTASE                 |
| 1YKO | PROTocatechuate 3,4-dioxygenase Y408H mutant                                                                                                                                              | OXIDOREDUCTASE                 |
| 1YKP | PROTocatechuate 3,4-dioxygenase Y408H mutant bound to DHB                                                                                                                                 | OXIDOREDUCTASE                 |
| 1YL3 | CRYSTAL STRUCTURE OF 70S RIBOSOME WITH THRS OPERATOR AND TRNAS. LARGE SUBUNIT. THE COORDINATES FOR THE SMALL SUBUNIT ARE IN THE PDB ENTRY 1YL4.                                           | RIBOSOME                       |
| 1YL4 | CRYSTAL STRUCTURE OF 70S RIBOSOME WITH THRS OPERATOR AND TRNAS. 30S SUBUNIT. THE COORDINATES FOR THE 50S SUBUNIT ARE IN THE PDB ENTRY 1YL3                                                | RIBOSOME                       |
| 1YM0 | CRYSTAL STRUCTURE OF EARTHWORM FIBRINOLYTIC ENZYME COMPONENT B: A NOVEL, GLYCOSYLATED TWO-CHAINED TRYPSIN                                                                                 | HYDROLASE                      |
| 1YMH | ANTI-HCV FAB 19D9D6 COMPLEXED WITH PROTEIN L (PPL) MUTANT A66W                                                                                                                            | IMMUNE SYSTEM                  |
| 1YMM | TCR/HLA-DR2B/MBP-PEPTIDE COMPLEX                                                                                                                                                          | IMMUNE SYSTEM                  |
| 1YMT | MOUSE SF-1 LBD                                                                                                                                                                            | TRANSCRIPTION                  |
| 1YN6 | CRYSTAL STRUCTURE OF A MOUSE MHC CLASS I PROTEIN, H2-DB, IN COMPLEX WITH A PEPTIDE FROM THE INFLUENZA A ACID POLYMERASE                                                                   | IMMUNE SYSTEM                  |
| 1YN7 | CRYSTAL STRUCTURE OF A MOUSE MHC CLASS I PROTEIN, H2-DB, IN COMPLEX WITH A MUTATED PEPTIDE (R7A) OF THE INFLUENZA A ACID POLYMERASE                                                       | IMMUNE SYSTEM                  |
| 1YNJ | TAQ RNA POLYMERASE-SORANGICIN COMPLEX                                                                                                                                                     | TRANSFERASE                    |
| 1YNK | IDENTIFICATION OF KEY RESIDUES OF THE NC6.8 FAB ANTIBODY FRAGMENT BINDING TO SYNTHETIC SWEETENERS: CRYSTAL STRUCTURE OF NC6.8 CO-CRYSTALIZED WITH HIGH POTENCY SWEETENER COMPOUND SC45647 | IMMUNE SYSTEM                  |
| 1YNL | IDENTIFICATION OF KEY RESIDUES OF THE NC6.8 FAB ANTIBODY FRAGMENT BINDING TO SYNTHETIC SWEETENERS: CRYSTAL STRUCTURE OF NC6.8 CO-CRYSTALIZED WITH HIGH POTENCY SWEETENER COMPOUND SC45647 | IMMUNE SYSTEM                  |
| 1YNN | TAQ RNA POLYMERASE-RIFAMPICIN COMPLEX                                                                                                                                                     | TRANSFERASE                    |

|      |                                                                                                                                                            |                                    |
|------|------------------------------------------------------------------------------------------------------------------------------------------------------------|------------------------------------|
| 1YNT | STRUCTURE OF THE IMMUNODOMINANT EPITOPE DISPLAYED BY THE SURFACE ANTIGEN 1 (SAG1) OF TOXOPLASMA GONDII COMPLEXED TO A MONOCLONAL ANTIBODY                  | IMMUNE SYSTEM                      |
| 1YOK | CRYSTAL STRUCTURE OF HUMAN LRH-1 BOUND WITH TIF-2 PEPTIDE AND PHOSPHATIDYLGlycerol                                                                         | TRANSCRIPTION                      |
| 1YOV | INSIGHTS INTO THE UBIQUITIN TRANSFER CASCADE FROM THE REFINED STRUCTURE OF THE ACTIVATING ENZYME FOR NEDD8                                                 | SIGNALING PROTEIN                  |
| 1YOW | HUMAN STEROIDOGENIC FACTOR 1 LBD WITH BOUND CO-FACTOR PEPTIDE                                                                                              | TRANSCRIPTION                      |
| 1YP0 | STRUCTURE OF THE STEROIDOGENIC FACTOR-1 LIGAND BINDING DOMAIN BOUND TO PHOSPHOLIPID AND A SHP PEPTIDE MOTIF                                                | TRANSCRIPTION                      |
| 1YPE | THROMBIN INHIBITOR COMPLEX                                                                                                                                 | BLOOD CLOTTING/HYDROLASE INHIBITOR |
| 1YPG | THROMBIN INHIBITOR COMPLEX                                                                                                                                 | BLOOD CLOTTING/HYDROLASE INHIBITOR |
| 1YPH | HIGH RESOLUTION STRUCTURE OF BOVINE ALPHA-CHYMOTRYPSIN                                                                                                     | HYDROLASE                          |
| 1YPJ | THROMBIN INHIBITOR COMPLEX                                                                                                                                 | BLOOD CLOTTING/HYDROLASE INHIBITOR |
| 1YPK | THROMBIN INHIBITOR COMPLEX                                                                                                                                 | HYDROLASE                          |
| 1YPL | X-RAY CRYSTAL STRUCTURE OF THROMBIN INHIBITED BY SYNTHETIC CYANOPEPTIDE ANALOGUE RA-1008                                                                   | BLOOD CLOTTING/HYDROLASE INHIBITOR |
| 1YPM | X-RAY CRYSTAL STRUCTURE OF THROMBIN INHIBITED BY SYNTHETIC CYANOPEPTIDE ANALOGUE RA-1014                                                                   | BLOOD CLOTTING/HYDROLASE INHIBITOR |
| 1YPZ | IMMUNE RECEPTOR                                                                                                                                            | IMMUNE SYSTEM                      |
| 1YQ3 | AVIAN RESPIRATORY COMPLEX II WITH OXALOACETATE AND UBIQUINONE                                                                                              | OXIDOREDUCTASE                     |
| 1YQ4 | AVIAN RESPIRATORY COMPLEX II WITH 3-NITROPROPIONATE AND UBIQUINONE                                                                                         | OXIDOREDUCTASE                     |
| 1YQ9 | STRUCTURE OF THE UNREADY OXIDIZED FORM OF [NIFE] HYDROGENASE                                                                                               | OXIDOREDUCTASE                     |
| 1YQV | THE CRYSTAL STRUCTURE OF THE ANTIBODY FAB HYHEL5 COMPLEX WITH LYSOZYME AT 1.7A RESOLUTION                                                                  | IMMUNE SYSTEM                      |
| 1YQW | STRUCTURE OF THE OXIDIZED UNREADY FORM OF NI-FE HYDROGENASE                                                                                                | OXIDOREDUCTASE                     |
| 1YR5 | 1.7-A STRUCTURE OF CALMODULIN BOUND TO A PEPTIDE FROM DAP KINASE                                                                                           | METAL BINDING PROTEIN/TRANSFERASE  |
| 1YRN | CRYSTAL STRUCTURE OF THE MATA1/MATALPHA2 HOMEODOMAIN HETERODIMER BOUND TO DNA                                                                              | DNA BINDING PROTEIN/DNA            |
| 1YRO | CRYSTAL STRUCTURE OF BETA14,-GALACTOSYLTRANSFERASE MUTANT ARG228LYS IN COMPLEX WITH ALPHA-LACTALBUMIN IN THE PRESENCE OF UDP-GALACTOSE AND MN              | TRANSFERASE ACTIVATOR/TRANSFERASE  |
| 1YRQ | STRUCTURE OF THE READY OXIDIZED FORM OF [NIFE]-HYDROGENASE                                                                                                 | OXIDOREDUCTASE                     |
| 1YRT | CRYSTAL STRUCTURE ANALYSIS OF THE ADENYLYL CYCLAES CATALYTIC DOMAIN OF ADENYLYL CYCLASE TOXIN OF BORDETELLA PERTUSSIS IN PRESENCE OF C-TERMINAL CALMODULIN | LAYSE, TOXIN                       |
| 1YRU | CRYSTAL STRUCTURE ANALYSIS OF THE ADENYLYL CYCLAES CATALYTIC DOMAIN OF ADENYLYL CYCLASE TOXIN OF BORDETELLA                                                | LAYSE, TOXIN                       |

PERTUSSIS IN PRESENCE OF C-TERMINAL CALMODULIN AND IMM  
CALCIUM CHLORIDE

|      |                                                                                                                                                   |                                         |
|------|---------------------------------------------------------------------------------------------------------------------------------------------------|-----------------------------------------|
| 1YSH | LOCALIZATION AND DYNAMIC BEHAVIOR OF RIBOSOMAL PROTEIN L30E                                                                                       | STRUCTURAL PROTEIN/RNA                  |
| 1YST | STRUCTURE OF THE PHOTOCHEMICAL REACTION CENTER OF A SPHEROIDENE CONTAINING PURPLE BACTERIUM, RHODOBACTER SPHAEROIDES Y, AT 3 ANGSTROMS RESOLUTION | PHOTOSYNTHETIC REACTION CENTER          |
| 1YTF | YEAST TFIIIA/TBP/DNA COMPLEX                                                                                                                      | TRANSCRIPTION/DNA                       |
| 1YTG | SIV PROTEASE CRYSTALLIZED WITH PEPTIDE PRODUCT                                                                                                    | COMPLEX (HYDROLASE/PEPTIDE)             |
| 1YTH | SIV PROTEASE CRYSTALLIZED WITH PEPTIDE PRODUCT                                                                                                    | COMPLEX (HYDROLASE/PEPTIDE)             |
| 1YTV | MALTOSE-BINDING PROTEIN FUSION TO A C-TERMINAL FRAGMENT OF THE VIA VASOPRESSIN RECEPTOR                                                           | SUGAR BINDING PROTEIN, HORMONE RECEPTOR |
| 1YTZ | CRYSTAL STRUCTURE OF SKELETAL MUSCLE TROPONIN IN THE CA <sup>2+</sup> -ACTIVATED STATE                                                            | CONTRACTILE PROTEIN                     |
| 1YU6 | CRYSTAL STRUCTURE OF THE SUBTILISIN CARLSBERG:OMTKY3 COMPLEX                                                                                      | HYDROLASE                               |
| 1YUC | HUMAN NUCLEAR RECEPTOR LIVER RECEPTOR HOMOLOGUE-1, LRH-1, BOUND TO PHOSPHOLIPID AND A FRAGMENT OF HUMAN SHP                                       | TRANSCRIPTION REGULATION                |
| 1YUH | FAB FRAGMENT                                                                                                                                      | IMMUNOGLOBULIN                          |
| 1YUK | THE CRYSTAL STRUCTURE OF THE PSI/HYBRID DOMAIN/ I-EGF1 SEGMENT FROM THE HUMAN INTEGRIN BETA2 AT 1.8 RESOLUTION                                    | CELL ADHESION                           |
| 1YV0 | CRYSTAL STRUCTURE OF SKELETAL MUSCLE TROPONIN IN THE CA <sup>2+</sup> -FREE STATE                                                                 | CONTRACTILE PROTEIN                     |
| 1YVH | CRYSTAL STRUCTURE OF THE C-CBL TKB DOMAIN IN COMPLEX WITH THE APS PTYR-618 PHOSHOPEPTIDE                                                          | LIGASE,SIGNALING PROTEIN,IMMUNE SYSTEM  |
| 1YVL | STRUCTURE OF UNPHOSPHORYLATED STAT1                                                                                                               | SIGNALING PROTEIN                       |
| 1YVN | THE YEAST ACTIN VAL 159 ASN MUTANT COMPLEX WITH HUMAN GELSOLIN SEGMENT 1.                                                                         | STRUCTURAL PROTEIN                      |
| 1YVQ | THE LOW SALT (PEG) CRYSTAL STRUCTURE OF CO HEMOGLOBIN E (BETA26K) APPROACHING PHYSIOLOGICAL PH (PH 7.5)                                           | TRANSPORT PROTEIN                       |
| 1YVT | THE HIGH SALT (PHOSPHATE) CRYSTAL STRUCTURE OF CO HEMOGLOBIN E (GLU26LYS) AT PHYSIOLOGICAL PH (PH 7.35)                                           | TRANSPORT PROTEIN                       |
| 1YWH | CRYSTAL STRUCTURE OF UROKINASE PLASMINOGEN ACTIVATOR RECEPTOR                                                                                     | HYDROLASE RECEPTOR                      |
| 1YWT | CRYSTAL STRUCTURE OF THE HUMAN SIGMA ISOFORM OF 14-3-3 IN COMPLEX WITH A MODE-1 PHOSHOPEPTIDE                                                     | SIGNALING PROTEIN/DE NOVO PROTEIN       |
| 1YY4 | CRYSTAL STRUCTURE OF ESTROGEN RECEPTOR BETA COMPLEXED WITH 1-CHLORO-6-(4-HYDROXY-PHENYL)-NAPHTHALEN-2-OL                                          | TRANSCRIPTION                           |
| 1YY8 | CRYSTAL STRUCTURE OF THE FAB FRAGMENT FROM THE MONOCLONAL ANTIBODY CETUXIMAB/ERBITUX/IMC-C225                                                     | IMMUNE SYSTEM                           |
| 1YY9 | STRUCTURE OF THE EXTRACELLULAR DOMAIN OF THE EPIDERMAL GROWTH FACTOR RECEPTOR IN COMPLEX WITH THE FAB FRAGMENT OF CETUXIMAB/ERBITUX/IMC-C225      | IMMUNE SYSTEM/SIGNALING PROTEIN         |
| 1YYE | CRYSTAL STRUCTURE OF ESTROGEN RECEPTOR BETA COMPLEXED WITH                                                                                        | TRANSCRIPTION                           |

WAY-202196

|      |                                                                                                                                                                     |                                     |
|------|---------------------------------------------------------------------------------------------------------------------------------------------------------------------|-------------------------------------|
| 1YYF | CORRECTION OF X-RAY INTENSITIES FROM AN HSLV-HSLU CO-CRYSTAL CONTAINING LATTICE TRANSLOCATION DEFECTS                                                               | CHAPERONE/HYDROLASE                 |
| 1YYL | CRYSTAL STRUCTURE OF CD4M33, A SCORPION-TOXIN MIMIC OF CD4, IN COMPLEX WITH HIV-1 YU2 GP120 ENVELOPE GLYCOPROTEIN AND ANTI-HIV-1 ANTIBODY 17B                       | VIRAL PROTEIN/IMMUNE SYSTEM         |
| 1YYM | CRYSTAL STRUCTURE OF F23, A SCORPION-TOXIN MIMIC OF CD4, IN COMPLEX WITH HIV-1 YU2 GP120 ENVELOPE GLYCOPROTEIN AND ANTI-HIV-1 ANTIBODY 17B                          | VIRAL PROTEIN/IMMUNE SYSTEM         |
| 1YYP | CRYSTAL STRUCTURE OF CYTOMEGALOVIRUS UL44 BOUND TO C-TERMINAL PEPTIDE FROM CMV UL54                                                                                 | REPLICATION/TRANSFERASE             |
| 1YZI | A NOVEL QUATERNARY STRUCTURE OF HUMAN CARBONMONOXY HEMOGLOBIN                                                                                                       | OXYGEN STORAGE/TRANSPORT            |
| 1Z0J | STRUCTURE OF GTP-BOUND RAB22Q64L GTPASE IN COMPLEX WITH THE MINIMAL RAB BINDING DOMAIN OF RABENOSYN-5                                                               | PROTEIN TRANSPORT                   |
| 1Z0K | STRUCTURE OF GTP-BOUND RAB4Q67L GTPASE IN COMPLEX WITH THE CENTRAL RAB BINDING DOMAIN OF RABENOSYN-5                                                                | PROTEIN TRANSPORT                   |
| 1Z2B | TUBULIN-COLCHICINE-VINBLASTINE: STATHMIN-LIKE DOMAIN COMPLEX                                                                                                        | CELL CYCLE                          |
| 1Z2C | CRYSTAL STRUCTURE OF MDIA1 GBD-FH3 IN COMPLEX WITH RHOC-GMPPNP                                                                                                      | SIGNALING PROTEIN                   |
| 1Z3E | CRYSTAL STRUCTURE OF SPX IN COMPLEX WITH THE C-TERMINAL DOMAIN OF THE RNA POLYMERASE ALPHA SUBUNIT                                                                  | TRANSCRIPTION                       |
| 1Z3G | CRYSTAL STRUCTURE OF COMPLEX BETWEEN PVS25 AND FAB FRAGMENT OF MALARIA TRANSMISSION BLOCKING ANTIBODY 2A8                                                           | IMMUNE SYSTEM/CELL ADHESION         |
| 1Z3L | X-RAY CRYSTAL STRUCTURE OF A MUTANT RIBONUCLEASE S (F8ANB)                                                                                                          | HYDROLASE                           |
| 1Z3M | CRYSTAL STRUCTURE OF MUTANT RIBONUCLEASE S (F8NVA)                                                                                                                  | HYDROLASE                           |
| 1Z3P | X-RAY CRYSTAL STRUCTURE OF A MUTANT RIBONUCLEASE S (M13NVA)                                                                                                         | HYDROLASE                           |
| 1Z56 | CO-CRYSTAL STRUCTURE OF LIF1P-LIG4P                                                                                                                                 | LIGASE                              |
| 1Z5L | STRUCTURE OF A HIGHLY POTENT SHORT-CHAIN GALACTOSYL CERAMIDE AGONIST BOUND TO CD1D                                                                                  | IMMUNE SYSTEM                       |
| 1Z5S | CRYSTAL STRUCTURE OF A COMPLEX BETWEEN UBC9, SUMO-1, RANGAP1 AND NUP358/RANBP2                                                                                      | LIGASE                              |
| 1Z5X | HEMIPTERAN ECDYSONE RECEPTOR LIGAND-BINDING DOMAIN COMPLEXED WITH PONAESTERONE A                                                                                    | HORMONE/GROWTH FACTOR RECEPTOR      |
| 1Z5Y | CRYSTAL STRUCTURE OF THE DISULFIDE-LINKED COMPLEX BETWEEN THE N-TERMINAL DOMAIN OF THE ELECTRON TRANSFER CATALYST DSBD AND THE CYTOCHROME C BIOGENESIS PROTEIN CCMG | OXIDOREDUCTASE/BIOSYNTHETIC PROTEIN |
| 1Z6E | CRYSTAL STRUCTURE OF FACTOR XA COMPLEXED TO RAZAXABAN                                                                                                               | HYDROLASE                           |
| 1Z6J | CRYSTAL STRUCTURE OF A TERNARY COMPLEX OF FACTOR VIIA/TISSUE FACTOR/PYRAZINONE INHIBITOR                                                                            | HYDROLASE                           |
| 1Z6O | CRYSTAL STRUCTURE OF TRICHOPLUSIA NI SECRETED FERRITIN                                                                                                              | METAL BINDING PROTEIN               |
| 1Z7M | ATP PHOSPHORIBOSYL TRANSFERASE (HISZG ATP-PRASE) FROM                                                                                                               | TRANSFERASE                         |

## LACTOCOCCUS LACTIS

|      |                                                                                                                                                                                                          |                                       |
|------|----------------------------------------------------------------------------------------------------------------------------------------------------------------------------------------------------------|---------------------------------------|
| 1Z7N | ATP PHOSPHORIBOSYL TRANSFERASE (HISZG ATP-PRASE) FROM LACTOCOCCUS LACTIS WITH BOUND PRPP SUBSTRATE                                                                                                       | TRANSFERASE                           |
| 1Z7Q | CRYSTAL STRUCTURE OF THE 20S PROTEASOME FROM YEAST IN COMPLEX WITH THE PROTEASOME ACTIVATOR PA26 FROM TRYPANOSOME BRUCEI AT 3.2 ANGSTROMS RESOLUTION                                                     | HYDROLASE/HYDROLASE ACTIVATOR         |
| 1Z7X | X-RAY STRUCTURE OF HUMAN RIBONUCLEASE INHIBITOR COMPLEXED WITH RIBONUCLEASE I                                                                                                                            | HYDROLASE/HYDROLASE INHIBITOR         |
| 1Z8C | CRYSTAL STRUCTURE OF THE COMPLEX OF MUTANT HIV-1 PROTEASE (L63P, A71V, V82T, I84V) WITH A HYDROXYETHYLAMINE PEPTIDOMIMETIC INHIBITOR BOC-PHE-PSI[R-CH(OH)CH <sub>2</sub> NH]-PHE-GLU-PHE-NH <sub>2</sub> | HYDROLASE/HYDROLASE INHIBITOR         |
| 1Z8I | CRYSTAL STRUCTURE OF THE THROMBIN MUTANT G193A BOUND TO PPACK                                                                                                                                            | HYDROLASE                             |
| 1Z8J | CRYSTAL STRUCTURE OF THE THROMBIN MUTANT G193P BOUND TO PPACK                                                                                                                                            | HYDROLASE                             |
| 1Z8U | CRYSTAL STRUCTURE OF OXIDIZED ALPHA HEMOGLOBIN BOUND TO AHSP                                                                                                                                             | ELECTRON TRANSPORT                    |
| 1Z8Y | MAPPING THE E2 GLYCOPROTEIN OF ALPHAVIRUSES                                                                                                                                                              | VIRUS                                 |
| 1Z92 | STRUCTURE OF INTERLEUKIN-2 WITH ITS ALPHA RECEPTOR                                                                                                                                                       | IMMUNE SYSTEM                         |
| 1Z9J | HOTOSYNTHETIC REACTION CENTER FROM RHODOBACTER SPHAEROIDES                                                                                                                                               | PHOTOSYNTHESIS                        |
| 1Z9K | HOTOSYNTHETIC REACTION CENTER FROM RHODOBACTER SPHAEROIDES                                                                                                                                               | PHOTOSYNTHESIS                        |
| 1Z9O | 1.9 ANGSTROM CRYSTAL STRUCTURE OF THE RAT VAP-A MSP HOMOLOGY DOMAIN IN COMPLEX WITH THE RAT ORP1 FFAT MOTIF                                                                                              | PROTEIN BINDING/LIPID BINDING PROTEIN |
| 1ZA1 | STRUCTURE OF WILD-TYPE E. COLI ASPARTATE TRANSCARBAMOYLASE IN THE PRESENCE OF CTP AT 2.20 A RESOLUTION                                                                                                   | TRANSFERASE                           |
| 1ZA2 | STRUCTURE OF WILD-TYPE E. COLI ASPARTATE TRANSCARBAMOYLASE IN THE PRESENCE OF CTP, CARBAMOYL PHOSPHATE AT 2.50 A RESOLUTION                                                                              | TRANSFERASE                           |
| 1ZA3 | THE CRYSTAL STRUCTURE OF THE YSD1 FAB BOUND TO DR5                                                                                                                                                       | IMMUNE SYSTEM/SIGNALING PROTEIN       |
| 1ZA6 | THE STRUCTURE OF AN ANTITUMOR CH2-DOMAIN-DELETED HUMANIZED ANTIBODY                                                                                                                                      | IMMUNE SYSTEM                         |
| 1ZAF | CRYSTAL STRUCTURE OF ESTROGEN RECEPTOR BETA COMPLEXED WITH 3-BROMO-6-HYDROXY-2-(4-HYDROXY-PHENYL)-INDEN-1-ONE                                                                                            | TRANSCRIPTION/TRANSFERASE             |
| 1ZAN | CRYSTAL STRUCTURE OF ANTI-NGF AD11 FAB                                                                                                                                                                   | IMMUNE SYSTEM                         |
| 1ZAV | RIBOSOMAL PROTEIN L10-L12(NTD) COMPLEX, SPACE GROUP P21                                                                                                                                                  | STRUCTURAL PROTEIN                    |
| 1ZAW | RIBOSOMAL PROTEIN L10-L12(NTD) COMPLEX, SPACE GROUP P212121, FORM A                                                                                                                                      | STRUCTURAL PROTEIN                    |
| 1ZAX | RIBOSOMAL PROTEIN L10-L12(NTD) COMPLEX, SPACE GROUP P212121, FORM B                                                                                                                                      | STRUCTURAL PROTEIN                    |
| 1ZB5 | RECOGNITION OF PEPTIDE LIGANDS BY SIGNALLING PROTEIN FROM PORCINE MAMMARY GLAND (SPP-40): CRYSTAL STRUCTURE OF THE COMPLEX OF SPP-40 WITH A PEPTIDE TRP-PRO-TRP AT 2.45A RESOLUTION                      | SIGNALING PROTEIN                     |

|      |                                                                                                                                                                                                  |                                       |
|------|--------------------------------------------------------------------------------------------------------------------------------------------------------------------------------------------------|---------------------------------------|
| 1ZBB | STRUCTURE OF THE 4_601_167 TETRANUCLEOSOME                                                                                                                                                       | STRUCTURAL PROTEIN/DNA                |
| 1ZBD | STRUCTURAL BASIS OF RAB EFFECTOR SPECIFICITY: CRYSTAL STRUCTURE OF THE SMALL G PROTEIN RAB3A COMPLEXED WITH THE EFFECTOR DOMAIN OF RABPHILIN-3A                                                  | G PROTEIN                             |
| 1ZBG | CRYSTAL STRUCTURE OF A COMPLEX OF MUTANT HIV-1 PROTEASE (A71V, V82T, I84V) WITH A HYDROXYETHYLAMINE PEPTIDOMIMETIC INHIBITOR BOC-PHE-PSI[R-CH(OH)CH <sub>2</sub> NH]-PHE-GLU-PHE-NH <sub>2</sub> | HYDROLASE/HYDROLASE INHIBITOR         |
| 1ZBX | CRYSTAL STRUCTURE OF A ORC1P-SIR1P COMPLEX                                                                                                                                                       | TRANSCRIPTION                         |
| 1ZC3 | CRYSTAL STRUCTURE OF THE RAL-BINDING DOMAIN OF EXO84 IN COMPLEX WITH THE ACTIVE RALA                                                                                                             | SIGNALING PROTEIN                     |
| 1ZC4 | CRYSTAL STRUCTURE OF THE RAL-BINDING DOMAIN OF EXO84 IN COMPLEX WITH THE ACTIVE RALA                                                                                                             | SIGNALING PROTEIN                     |
| 1ZDT | THE CRYSTAL STRUCTURE OF HUMAN STEROIDOGENIC FACTOR-1                                                                                                                                            | TRANSCRIPTION                         |
| 1ZDU | THE CRYSTAL STRUCTURE OF HUMAN LIVER RECEPTOR HOMOLOGUE-1                                                                                                                                        | TRANSCRIPTION                         |
| 1ZE3 | CRYSTAL STRUCTURE OF THE TERNARY COMPLEX OF FIMD (N-TERMINAL DOMAIN) WITH FIMC AND THE PILIN DOMAIN OF FIMH                                                                                      | CHAPERONE/STRUCTURAL/MEMBRANE PROTEIN |
| 1ZEA | STRUCTURE OF THE ANTI-CHOLERA TOXIN ANTIBODY FAB FRAGMENT TE33 IN COMPLEX WITH A D-PEPTIDE                                                                                                       | IMMUNE SYSTEM                         |
| 1ZEG | STRUCTURE OF B28 ASP INSULIN IN COMPLEX WITH PHENOL                                                                                                                                              | HORMONE                               |
| 1ZEH | STRUCTURE OF INSULIN                                                                                                                                                                             | HORMONE                               |
| 1ZFP | GROWTH FACTOR RECEPTOR BINDING PROTEIN SH2 DOMAIN COMPLEXED WITH A PHOSPHOTYROSYL PENTAPEPTIDE                                                                                                   | COMPLEX (SIGNAL TRANSDUCTION/PEPTIDE) |
| 1ZGL | CRYSTAL STRUCTURE OF 3A6 TCR BOUND TO MBP/HLA-DR2A                                                                                                                                               | IMMUNE SYSTEM                         |
| 1ZGX | CRYSTAL STRUCTURE OF RIBONUCLEASE MUTANT                                                                                                                                                         | HYDROLASE                             |
| 1ZGY | STRUCTURAL AND BIOCHEMICAL BASIS FOR SELECTIVE REPRESSION OF THE ORPHAN NUCLEAR RECEPTOR LRH-1 BY SHP                                                                                            | TRANSCRIPTION                         |
| 1ZH7 | STRUCTURAL AND BIOCHEMICAL BASIS FOR SELECTIVE REPRESSION OF THE ORPHAN NUCLEAR RECEPTOR LRH-1 BY SHP                                                                                            | TRANSCRIPTION                         |
| 1ZHB | CRYSTAL STRUCTURE OF THE MURINE CLASS I MAJOR HISTOCOMPATIBILITY COMPLEX OF H-2DB, B2-MICROGLOBULIN, AND A 9-RESIDUE PEPTIDE DERIVED FROM RAT DOPAMINE BETA-MONOOXYGENASE                        | IMMUNE SYSTEM                         |
| 1ZHH | CRYSTAL STRUCTURE OF THE APO FORM OF VIBRIO HARVEYI LUXP COMPLEXED WITH THE PERIPLASMIC DOMAIN OF LUXQ                                                                                           | SIGNALING PROTEIN                     |
| 1ZHI | COMPLEX OF THE S. CEREVISIAE ORC1 AND SIR1 INTERACTING DOMAINS                                                                                                                                   | TRANSCRIPTION/REPLICATION             |
| 1ZHK | CRYSTAL STRUCTURE OF HLA-B*3501 PRESENTING 13-MER EBV ANTIGEN LPEPLPQGQLTAY                                                                                                                      | IMMUNE SYSTEM                         |
| 1ZHL | CRYSTAL STRUCTURE OF HLA-B*3508 PRESENTING 13-MER EBV ANTIGEN LPEPLPQGQLTAY                                                                                                                      | IMMUNE SYSTEM                         |
| 1ZKY | HUMAN ESTROGEN RECEPTOR ALPHA LIGAND-BINDING DOMAIN IN COMPLEX WITH OBCP-3M AND A GLUCOCORTICOID RECEPTOR                                                                                        | HORMONE/GROWTH FACTOR RECEPTOR        |

| INTERACTING PROTEIN 1 NR BOX II PEPTIDE |                                                                                                                                                                           |                                  |
|-----------------------------------------|---------------------------------------------------------------------------------------------------------------------------------------------------------------------------|----------------------------------|
| 1ZLA                                    | X-RAY STRUCTURE OF A KAPOSI'S SARCOMA HERPESVIRUS LANA PEPTIDE BOUND TO THE NUCLEOSOMAL CORE                                                                              | PROTEIN BINDING/VIRUS/DNA        |
| 1ZLF                                    | CRYSTAL STRUCTURE OF A COMPLEX OF MUTANT HIV-1 PROTEASE (A71V, V82T, I84V) WITH A HYDROXYETHYLAMINE PEPTIDOMIMETIC INHIBITOR                                              | HYDROLASE/HYDROLASE INHIBITOR    |
| 1ZLH                                    | CRYSTAL STRUCTURE OF THE TICK CARBOXYPEPTIDASE INHIBITOR IN COMPLEX WITH BOVINE CARBOXYPEPTIDASE A                                                                        | HYDROLASE/HYDROLASE INHIBITOR    |
| 1ZLI                                    | CRYSTAL STRUCTURE OF THE TICK CARBOXYPEPTIDASE INHIBITOR IN COMPLEX WITH HUMAN CARBOXYPEPTIDASE B                                                                         | HYDROLASE/HYDROLASE INHIBITOR    |
| 1ZLU                                    | FAB 2G12 + MAN5                                                                                                                                                           | IMMUNE SYSTEM                    |
| 1ZLW                                    | FAB 2G12 + MAN8                                                                                                                                                           | IMMUNE SYSTEM                    |
| 1ZM2                                    | STRUCTURE OF ADP-RIBOSYLATED EEF2 IN COMPLEX WITH CATALYTIC FRAGMENT OF ETA                                                                                               | BIOSYNTHETIC PROTEIN/TRANSFERASE |
| 1ZM3                                    | STRUCTURE OF THE APO EEF2-ETA COMPLEX                                                                                                                                     | BIOSYNTHETIC PROTEIN/TRANSFERASE |
| 1ZM4                                    | STRUCTURE OF THE EEF2-ETA-BTAD COMPLEX                                                                                                                                    | BIOSYNTHETIC PROTEIN/TRANSFERASE |
| 1ZM6                                    | CRYSTAL STRUCTURE OF THE COMPLEX FORMED BETWEEN A GROUP I PHOSPHOLIPASE A2 AND DESIGNED PENTA PEPTIDE LEU-ALA-ILE-TYR-SER AT 2.6A RESOLUTION                              | HYDROLASE                        |
| 1ZM9                                    | STRUCTURE OF EEF2-ETA IN COMPLEX WITH PJ34                                                                                                                                | BIOSYNTHETIC PROTEIN/TRANSFERASE |
| 1ZMY                                    | CABBII-10 VHH FRAMEWORK WITH CDR LOOPS OF CABLYS3 GRAFTED ON IT AND IN COMPLEX WITH HEN EGG WHITE LYSOZYME                                                                | IMMUNE SYSTEM/HYDROLASE          |
| 1ZNI                                    | INSULIN                                                                                                                                                                   | HORMONE                          |
| 1ZNJ                                    | INSULIN, MONOCLINIC CRYSTAL FORM                                                                                                                                          | HORMONE                          |
| 1ZNV                                    | HOW A HIS-METAL FINGER ENDONUCLEASE COLE7 BINDS AND CLEAVES DNA WITH A TRANSITION METAL ION COFACTOR                                                                      | HYDROLASE/PROTEIN BINDING        |
| 1ZO1                                    | IF2, IF1, AND TRNA FITTED TO CRYO-EM DATA OF E. COLI 70S INITIATION COMPLEX                                                                                               | TRANSLATION/RNA                  |
| 1ZOQ                                    | IRF3-CBP COMPLEX                                                                                                                                                          | TRANSCRIPTION/TRANSFERASE        |
| 1ZOT                                    | CRYSTAL STRUCTURE ANALYSIS OF THE CYAA/C-CAM WITH PMEAPP                                                                                                                  | LYASE                            |
| 1ZOY                                    | CRYSTAL STRUCTURE OF MITOCHONDRIAL RESPIRATORY COMPLEX II FROM PORCINE HEART AT 2.4 ANGSTROMS                                                                             | OXIDOREDUCTASE                   |
| 1ZP0                                    | CRYSTAL STRUCTURE OF MITOCHONDRIAL RESPIRATORY COMPLEX II BOUND WITH 3-NITROPROPIONATE AND 2-THENOYLTRIFLUOROACETONE                                                      | OXIDOREDUCTASE                   |
| 1ZPK                                    | CRYSTAL STRUCTURE OF THE COMPLEX OF MUTANT HIV-1 PROTEASE (A71V, V82T, I84V) WITH A HYDROXYETHYLAMINE PEPTIDOMIMETIC INHIBITOR BOC-PHE-PSI[R-CH(OH)CH2NH]-PHE-GLU-PHE-NH2 | HYDROLASE/HYDROLASE INHIBITOR    |
| 1ZQ1                                    | STRUCTURE OF GATDE TRNA-DEPENDENT AMIDOTRANSFERASE FROM PYROCOCCLUS ABYSSI                                                                                                | LYASE                            |
| 1ZR0                                    | CRYSTAL STRUCTURE OF KUNITZ DOMAIN 1 OF TISSUE FACTOR PATHWAY INHIBITOR-2 WITH BOVINE TRYPSIN                                                                             | HYDROLASE/BLOOD CLOTTING         |



|      |                                                                                                                                                          |                                   |
|------|----------------------------------------------------------------------------------------------------------------------------------------------------------|-----------------------------------|
| 1ZRT | RHODOBACTER CAPSULATUS CYTOCHROME BC1 COMPLEX WITH STIGMATELLIN BOUND                                                                                    | OXIDOREDUCTASE/METAL TRANSPORT    |
| 1ZS8 | CRYSTAL STRUCTURE OF THE MURINE MHC CLASS IB MOLECULE M10.5                                                                                              | IMMUNE SYSTEM                     |
| 1ZSD | CRYSTAL STRUCTURE OF HLA-B*3501 PRESENTING AN 11-MER EBV ANTIGEN EPLPQGQLTAY                                                                             | IMMUNE SYSTEM                     |
| 1ZSF | CRYSTAL STRUCTURE OF COMPLEX OF A HYDROXYETHYLAMINE INHIBITOR WITH HIV-1 PROTEASE AT 2.0A RESOLUTION                                                     | HYDROLASE/HYDROLASE INHIBITOR     |
| 1ZSR | CRYSTAL STRUCTURE OF WILD TYPE HIV-1 PROTEASE (BRU ISOLATE) WITH A HYDROXYETHYLAMINE PEPTIDOMIMETIC INHIBITOR BOC-PHE-PSI[S-CH(OH)CH2NH]-PHE-GLU-PHE-NH2 | HYDROLASE/HYDROLASE INHIBITOR     |
| 1ZSZ | CRYSTAL STRUCTURE OF A COMPUTATIONALLY DESIGNED SSPB HETERODIMER                                                                                         | DE NOVO PROTEIN                   |
| 1ZT1 | CRYSTAL STRUCTURE OF CLASS I MHC H-2KK IN COMPLEX WITH AN OCTAPEPTIDE                                                                                    | IMMUNE SYSTEM                     |
| 1ZT2 | HETERODIMERIC STRUCTURE OF THE CORE PRIMASE.                                                                                                             | REPLICATION, TRANSFERASE          |
| 1ZT4 | THE CRYSTAL STRUCTURE OF HUMAN CD1D WITH AND WITHOUT ALPHA-GALACTOSYLCERAMIDE                                                                            | IMMUNE SYSTEM                     |
| 1ZT7 | CRYSTAL STRUCTURE OF CLASS I MHC H-2KK IN COMPLEX WITH A NONAPEPTIDE                                                                                     | IMMUNE SYSTEM                     |
| 1ZTX | WEST NILE VIRUS ENVELOPE PROTEIN DIII IN COMPLEX WITH NEUTRALIZING E16 ANTIBODY FAB                                                                      | VIRAL PROTEIN/IMMUNE SYSTEM       |
| 1ZTZ | CRYSTAL STRUCTURE OF HIV PROTEASE- METALLACARBORANE COMPLEX                                                                                              | HYDROLASE                         |
| 1ZUN | CRYSTAL STRUCTURE OF A GTP-REGULATED ATP SULFURYLASE HETERODIMER FROM PSEUDOMONAS SYRINGAE                                                               | TRANSFERASE                       |
| 1ZUZ | CALMODULIN IN COMPLEX WITH A MUTANT PEPTIDE FROM HUMAN DRP-1 KINASE                                                                                      | METAL BINDING PROTEIN/TRANSFERASE |
| 1ZV5 | CRYSTAL STRUCTURE OF THE VARIABLE DOMAIN OF THE CAMELID HEAVY-CHAIN ANTIBODY D2-L29 IN COMPLEX WITH HEN EGG WHITE LYSOZYME                               | HYDROLASE/IMMUNE SYSTEM           |
| 1ZV8 | A STRUCTURE-BASED MECHANISM OF SARS VIRUS MEMBRANE FUSION                                                                                                | VIRUS/VIRAL PROTEIN               |
| 1ZVS | CRYSTAL STRUCTURE OF THE FIRST CLASS MHC MAMU AND TAT-TL8 COMPLEX                                                                                        | IMMUNE SYSTEM                     |
| 1ZVV | CRYSTAL STRUCTURE OF A CCPA-CRH-DNA COMPLEX                                                                                                              | TRANSCRIPTION/DNA                 |
| 1ZVY | CRYSTAL STRUCTURE OF THE VHH D3-L11 IN COMPLEX WITH HEN EGG WHITE LYSOZYME                                                                               | HYDROLASE/IMMUNE SYSTEM           |
| 1ZVZ | VINCULIN HEAD (0-258) IN COMPLEX WITH THE TALIN ROD RESIDUE 820-844                                                                                      | PROTEIN BINDING                   |
| 1ZW2 | VINCULIN HEAD (0-258) IN COMPLEX WITH THE TALIN ROD RESIDUES 2345-2369                                                                                   | PROTEIN BINDING                   |
| 1ZW3 | VINCULIN HEAD (0-258) IN COMPLEX WITH THE TALIN ROD RESIDUES 1630-1652                                                                                   | PROTEIN BINDING                   |
| 1ZWI | STRUCTURE OF MUTANT KCSA POTASSIUM CHANNEL                                                                                                               | IMMUNE SYSTEM/ION TRANSPORT       |

|      |                                                                                                                                                                                                 |                                      |
|------|-------------------------------------------------------------------------------------------------------------------------------------------------------------------------------------------------|--------------------------------------|
| 1ZXI | RECONSTITUTED CO DEHYDROGENASE FROM OLIGOTROPHA CARBOXIDOVORANS                                                                                                                                 | OXIDOREDUCTASE                       |
| 1ZY1 | X-RAY STRUCTURE OF PEPTIDE DEFORMYLASE FROM ARABIDOPSIS THALIANA (ATPDF1A) IN COMPLEX WITH MET-ALA-SER                                                                                          | HYDROLASE                            |
| 1ZY3 | STRUCTURAL MODEL OF COMPLEX OF BCL-W PROTEIN WITH BID BH3-PEPTIDE                                                                                                                               | APOPTOSIS                            |
| 1ZY8 | THE CRYSTAL STRUCTURE OF DIHYDROLIPOAMIDE DEHYDROGENASE AND DIHYDROLIPOAMIDE DEHYDROGENASE-BINDING PROTEIN (DIDOMAIN) SUBCOMPLEX OF HUMAN PYRUVATE DEHYDROGENASE COMPLEX.                       | OXIDOREDUCTASE                       |
| 1ZYQ | T7 DNA POLYMERASE IN COMPLEX WITH 8OG AND INCOMING DDATP                                                                                                                                        | TRANSFERASE/ELECTRON TRANSPORT/DNA   |
| 1ZYR | STRUCTURE OF THERMUS THERMOPHILUS RNA POLYMERASE HOLOENZYME IN COMPLEX WITH THE ANTIBIOTIC STREPTOLYDIGIN                                                                                       | TRANSCRIPTION,TRANSFERASE            |
| 1ZZD | STRUCTURES OF YEAST RIBONUCLEOTIDE REDUCTASE I                                                                                                                                                  | OXIDOREDUCTASE                       |
| 207L | MUTANT HUMAN LYSOZYME C77A                                                                                                                                                                      | COMPLEX (HYDROLASE (O-GLYCOSYL)/CYS) |
| 25C8 | CATALYTIC ANTIBODY 5C8, FAB-HAPTEN COMPLEX                                                                                                                                                      | CATALYTIC ANTIBODY                   |
| 2A06 | BOVINE CYTOCHROME BC1 COMPLEX WITH STIGMATELLIN BOUND                                                                                                                                           | OXIDOREDUCTASE                       |
| 2A0F | STRUCTURE OF D236A MUTANT E. COLI ASPARTATE TRANSCARBAMOYLASE IN PRESENCE OF PHOSPHONOACETAMIDE AT 2.90 Å RESOLUTION                                                                            | TRANSFERASE/TRANSFERASE REGULATOR    |
| 2A0L | CRYSTAL STRUCTURE OF KVAP-33H1 FV COMPLEX                                                                                                                                                       | MEMBRANE PROTEIN                     |
| 2A0Q | STRUCTURE OF THROMBIN IN 400 MM POTASSIUM CHLORIDE                                                                                                                                              | HYDROLASE                            |
| 2A19 | PKR KINASE DOMAIN- EIF2ALPHA- AMP-PNP COMPLEX.                                                                                                                                                  | PROTEIN SYNTHESIS/TRANSFERASE        |
| 2A1A | PKR KINASE DOMAIN-EIF2ALPHA COMPLEX                                                                                                                                                             | PROTEIN SYNTHESIS/TRANSFERASE        |
| 2A1D | STAPHYLOCOAGULASE BOUND TO BOVINE THROMBIN                                                                                                                                                      | HYDROLASE                            |
| 2A1J | CRYSTAL STRUCTURE OF THE COMPLEX BETWEEN THE C-TERMINAL DOMAINS OF HUMAN XPF AND ERCC1                                                                                                          | DNA BINDING PROTEIN                  |
| 2A1T | STRUCTURE OF THE HUMAN MCAD:ETF E165BETAA COMPLEX                                                                                                                                               | OXIDOREDUCTASE/ELECTRON TRANSPORT    |
| 2A1U | CRYSTAL STRUCTURE OF THE HUMAN ETF E165BETAA MUTANT                                                                                                                                             | ELECTRON TRANSPORT                   |
| 2A1W | ANTI-COCAINE ANTIBODY 7.5.21, CRYSTAL FORM I                                                                                                                                                    | IMMUNE SYSTEM                        |
| 2A2Q | COMPLEX OF ACTIVE-SITE INHIBITED HUMAN COAGULATION FACTOR VIIA WITH HUMAN SOLUBLE TISSUE FACTOR IN THE PRESENCE OF CA <sup>2+</sup> , MG <sup>2+</sup> , NA <sup>+</sup> , AND ZN <sup>2+</sup> | HYDROLASE/BLOOD CLOTTING             |
| 2A2X | ORALLY ACTIVE THROMBIN INHIBITORS IN COMPLEX WITH THROMBIN INH12                                                                                                                                | HYDROLASE/HYDROLASE INHIBITOR        |
| 2A3G | THE STRUCTURE OF T6 BOVINE INSULIN                                                                                                                                                              | HORMONE/GROWTH FACTOR                |
| 2A3I | STRUCTURAL AND BIOCHEMICAL MECHANISMS FOR THE SPECIFICITY OF HORMONE BINDING AND COACTIVATOR ASSEMBLY BY MINERALOCORTICOID RECEPTOR                                                             | TRANSFERASE                          |
| 2A3Z | TERNARY COMPLEX OF THE WH2 DOMAIN OF WASP WITH ACTIN-DNASE I                                                                                                                                    | STRUCTURAL PROTEIN                   |
| 2A40 | TERNARY COMPLEX OF THE WH2 DOMAIN OF WAVE WITH ACTIN-DNASE I                                                                                                                                    | STRUCTURAL PROTEIN                   |

|      |                                                                                                                                            |                                   |
|------|--------------------------------------------------------------------------------------------------------------------------------------------|-----------------------------------|
| 2A41 | TERNARY COMPLEX OF THE WH2 DOMAIN OF WIP WITH ACTIN-DNASE I                                                                                | STRUCTURAL PROTEIN                |
| 2A42 | ACTIN-DNASE I COMPLEX                                                                                                                      | STRUCTURAL PROTEIN                |
| 2A45 | CRYSTAL STRUCTURE OF THE COMPLEX BETWEEN THROMBIN AND THE CENTRAL "E" REGION OF FIBRIN                                                     | BLOOD CLOTING                     |
| 2A4G | HEPATITIS C PROTEASE NS3-4A SERINE PROTEASE WITH KETOAMIDE INHIBITOR SCH225724 BOUND                                                       | VIRUS/VIRAL PROTEIN               |
| 2A4Q | HCV NS3 PROTEASE WITH NS4A PEPTIDE AND A COVALENTLY BOUND MACROCYCLIC KETOAMIDE COMPOUND.                                                  | VIRUS/VIRAL PROTEIN               |
| 2A4R | HCV NS3 PROTEASE DOMAIN WITH A KETOAMIDE INHIBITOR COVALENTLY BOUND.                                                                       | VIRUS/VIRAL PROTEIN               |
| 2A50 | FLUORESCENT PROTEIN ASFP595, WT, OFF-STATE                                                                                                 | LUMINESCENT PROTEIN               |
| 2A52 | FLUORESCENT PROTEIN ASFP595, S158V, ON-STATE                                                                                               | LUMINESCENT PROTEIN               |
| 2A53 | FLUORESCENT PROTEIN ASFP595, A143S, OFF-STATE                                                                                              | LUMINESCENT PROTEIN               |
| 2A54 | FLUORESCENT PROTEIN ASFP595, A143S, ON-STATE, 1MIN IRRADIATION                                                                             | LUMINESCENT PROTEIN               |
| 2A56 | FLUORESCENT PROTEIN ASFP595, A143S, ON-STATE, 5MIN IRRADIATION                                                                             | LUMINESCENT PROTEIN               |
| 2A5D | STRUCTURAL BASIS FOR THE ACTIVATION OF CHOLERA TOXIN BY HUMAN ARF6-GTP                                                                     | PROTEIN TRANSPORT/TRANSFERASE     |
| 2A5F | CHOLERA TOXIN A1 SUBUNIT BOUND TO ITS SUBSTRATE, NAD <sup>+</sup> , AND ITS HUMAN PROTEIN ACTIVATOR, ARF6                                  | PROTEIN TRANSPORT/TRANSFERASE     |
| 2A5G | CHOLERA TOXIN A1 SUBUNIT BOUND TO ARF6(Q67L)                                                                                               | PROTEIN TRANSPORT/TRANSFERASE     |
| 2A5T | CRYSTAL STRUCTURE OF THE NR1/NR2A LIGAND-BINDING CORES COMPLEX                                                                             | METAL TRANSPORT, MEMBRANE PROTEIN |
| 2A5Y | STRUCTURE OF A CED-4/CED-9 COMPLEX                                                                                                         | APOPTOSIS                         |
| 2A68 | CRYSTAL STRUCTURE OF THE T. THERMOPHILUS RNA POLYMERASE HOLOENZYME IN COMPLEX WITH ANTIBIOTIC RIFABUTIN                                    | TRANSFERASE                       |
| 2A69 | CRYSTAL STRUCTURE OF THE T. THERMOPHILUS RNA POLYMERASE HOLOENZYME IN COMPLEX WITH ANTIBIOTIC RIFAPENTIN                                   | TRANSFERASE                       |
| 2A6D | CRYSTAL STRUCTURE ANALYSIS OF THE ANTI-ARSONATE GERMLINE ANTIBODY 36-65 IN COMPLEX WITH A PHAGE DISPLAY DERIVED DODECAPEPTIDE RLLIADPPSPRE | IMMUNE SYSTEM                     |
| 2A6E | CRYSTAL STRUCTURE OF THE T. THERMOPHILUS RNA POLYMERASE HOLOENZYME                                                                         | TRANSFERASE                       |
| 2A6H | CRYSTAL STRUCTURE OF THE T. THERMOPHILUS RNA POLYMERASE HOLOENZYME IN COMPLEX WITH ANTIBIOTIC STERPTOLYDIGIN                               | TRANSFERASE                       |
| 2A6I | CRYSTAL STRUCTURE ANALYSIS OF THE ANTI-ARSONATE GERMLINE ANTIBODY 36-65 IN COMPLEX WITH A PHAGE DISPLAY DERIVED DODECAPEPTIDE KLASIPTHTSPL | IMMUNE SYSTEM                     |
| 2A6J | CRYSTAL STRUCTURE ANALYSIS OF THE ANTI-ARSONATE GERMLINE ANTIBODY 36-65                                                                    | IMMUNE SYSTEM                     |

|      |                                                                                                                                         |                                   |
|------|-----------------------------------------------------------------------------------------------------------------------------------------|-----------------------------------|
| 2A6K | CRYSTAL STRUCTURE ANALYSIS OF THE GERMLINE ANTIBODY 36-65 FAB IN COMPLEX WITH THE DODECAPEPTIDE SLGDNLTNHNL                             | IMMUNE SYSTEM                     |
| 2A6Q | CRYSTAL STRUCTURE OF YEFM-YOEB COMPLEX                                                                                                  | TOXIN INHIBITOR/TOXIN             |
| 2A74 | HUMAN COMPLEMENT COMPONENT C3C                                                                                                          | IMMUNE SYSTEM                     |
| 2A77 | ANTI-COCAINE ANTIBODY 7.5.21, CRYSTAL FORM II                                                                                           | IMMUNE SYSTEM                     |
| 2A78 | CRYSTAL STRUCTURE OF THE C3BOT-RALA COMPLEX REVEALS A NOVEL TYPE OF ACTION OF A BACTERIAL EXOENZYME                                     | PROTEIN BINDING/TRANSFERASE       |
| 2A79 | MAMMALIAN SHAKER KV1.2 POTASSIUM CHANNEL- BETA SUBUNIT COMPLEX                                                                          | MEMBRANE PROTEIN                  |
| 2A7U | NMR SOLUTION STRUCTURE OF THE E.COLI F-ATPASE DELTA SUBUNIT N-TERMINAL DOMAIN IN COMPLEX WITH ALPHA SUBUNIT N-TERMINAL 22 RESIDUES      | HYDROLASE                         |
| 2A83 | CRYSTAL STRUCTURE OF HLA-B*2705 COMPLEXED WITH THE GLUCAGON RECEPTOR (GR) PEPTIDE (RESIDUES 412-420)                                    | IMMUNE SYSTEM                     |
| 2A9H | NMR STRUCTURAL STUDIES OF A POTASSIUM CHANNEL / CHARYBDOTOXIN COMPLEX                                                                   | METAL TRANSPORT, MEMBRANE PROTEIN |
| 2A9K | CRYSTAL STRUCTURE OF THE C3BOT-NAD-RALA COMPLEX REVEALS A NOVEL TYPE OF ACTION OF A BACTERIAL EXOENZYME                                 | PROTEIN BINDING/TRANSFERASE       |
| 2A9M | STRUCTURAL ANALYSIS OF A TIGHT-BINDING FLUORESCHEIN-SCFV; APO FORM                                                                      | IMMUNE SYSTEM                     |
| 2AA1 | CRYSTAL STRUCTURE OF THE CATHODIC HEMOGLOBIN ISOLATED FROM THE ANTARCTIC FISH TREMATOMUS NEWNESI                                        | OXYGEN STORAGE/TRANSPORT          |
| 2AAB | STRUCTURAL BASIS OF ANTIGEN MIMICRY IN A CLINICALLY RELEVANT MELANOMA ANTIGEN SYSTEM                                                    | IMMUNE SYSTEM                     |
| 2AAI | CRYSTALLOGRAPHIC REFINEMENT OF RICIN TO 2.5 ANGSTROMS                                                                                   | GLYCOSIDASE                       |
| 2ABZ | CRYSTAL STRUCTURE OF C19A/C43A MUTANT OF LEECH CARBOXYPEPTIDASE INHIBITOR IN COMPLEX WITH BOVINE CARBOXYPEPTIDASE A                     | HYDROLASE/HYDROLASE INHIBITOR     |
| 2ACH | CRYSTAL STRUCTURE OF CLEAVED HUMAN ALPHA1-ANTICHYMOTRYPSIN AT 2.7 ANGSTROMS RESOLUTION AND ITS COMPARISON WITH OTHER SERPINS            | PROTEINASE INHIBITOR              |
| 2ACL | LIVER X-RECEPTOR ALPHA LIGAND BINDING DOMAIN WITH SB313987                                                                              | TRANSCRIPTION                     |
| 2ACZ | COMPLEX II (SUCCINATE DEHYDROGENASE) FROM E. COLI WITH ATPENIN A5 INHIBITOR CO-CRYSTALLIZED AT THE UBIQUINONE BINDING SITE              | OXIDOREDUCTASE/ELECTRON TRANSPORT |
| 2AD6 | CRYSTAL STRUCTURE OF METHANOL DEHYDROGENASE FROM M. W3A1 (FORM C)                                                                       | OXIDOREDUCTASE                    |
| 2AD7 | CRYSTAL STRUCTURE OF METHANOL DEHYDROGENASE FROM M. W3A1 (FORM C) IN THE PRESENCE OF METHANOL                                           | OXIDOREDUCTASE                    |
| 2AD8 | CRYSTAL STRUCTURE OF METHANOL DEHYDROGENASE FROM M. W3A1 (FORM C) IN THE PRESENCE OF ETHANOL                                            | OXIDOREDUCTASE                    |
| 2ADF | CRYSTAL STRUCTURE AND PARATOPE DETERMINATION OF 82D6A3, AN ANTITHROMBOTIC ANTIBODY DIRECTED AGAINST THE VON WILLEBRAND FACTOR A3-DOMAIN | BLOOD CLOTTING/IMMUNE SYSTEM      |

|      |                                                                                                                                                                                           |                           |
|------|-------------------------------------------------------------------------------------------------------------------------------------------------------------------------------------------|---------------------------|
| 2ADG | CRYSTAL STRUCTURE OF MONOCLONAL ANTI-CD4 ANTIBODY Q425                                                                                                                                    | IMMUNE SYSTEM             |
| 2ADI | CRYSTAL STRUCTURE OF MONOCLONAL ANTI-CD4 ANTIBODY Q425 IN COMPLEX WITH BARIUM                                                                                                             | IMMUNE SYSTEM             |
| 2ADJ | CRYSTAL STRUCTURE OF MONOCLONAL ANTI-CD4 ANTIBODY Q425 IN COMPLEX WITH CALCIUM                                                                                                            | IMMUNE SYSTEM             |
| 2ADV | CRYSTAL STRUCTURES OF GLUTARYL 7-AMINOCEPHALOSPORANIC ACID ACYLASE: MUTATIONAL STUDY OF ACTIVATION MECHANISM                                                                              | HYDROLASE                 |
| 2AE3 | GLUTARYL 7-AMINOCEPHALOSPORANIC ACID ACYLASE: MUTATIONAL STUDY OF ACTIVATION MECHANISM                                                                                                    | HYDROLASE                 |
| 2AE4 | GLUTARYL 7-AMINOCEPHALOSPORANIC ACID ACYLASE: MUTATIONAL STUDY OF ACTIVATION MECHANISM                                                                                                    | HYDROLASE                 |
| 2AE5 | GLUTARYL 7-AMINOCEPHALOSPORANIC ACID ACYLASE: MUTATIONAL STUDY OF ACTIVATION MECHANISM                                                                                                    | HYDROLASE                 |
| 2AEI | CRYSTAL STRUCTURE OF A TERNARY COMPLEX OF FACTOR VIIA/TISSUE FACTOR AND 2-[[6-[3-(AMINOIMINOMETHYL)PHENOXY]-3,5-DIFLUORO-4-[(1-METHYL-3-PHENYLPROPYL)AMINO]-2-PYRIDINYL]OXY]-BENZOIC ACID | HYDROLASE                 |
| 2AER | CRYSTAL STRUCTURE OF BENZAMIDINE-FACTOR VIIA/SOLUBLE TISSUE FACTOR COMPLEX.                                                                                                               | BLOOD CLOTTING            |
| 2AFH | CRYSTAL STRUCTURE OF NUCLEOTIDE-FREE AV2-AV1 COMPLEX                                                                                                                                      | OXIDOREDUCTASE            |
| 2AFI | CRYSTAL STRUCTURE OF MGADP BOUND AV2-AV1 COMPLEX                                                                                                                                          | OXIDOREDUCTASE            |
| 2AFK | CRYSTAL STRUCTURE OF MGAMPPCP-BOUND AV2-AV1 COMPLEX                                                                                                                                       | OXIDOREDUCTASE            |
| 2AFQ | 1.9 ANGSTROM CRYSTAL STRUCTURE OF WILD-TYPE HUMAN THROMBIN IN THE SODIUM FREE STATE                                                                                                       | BLOOD CLOTTING, HYDROLASE |
| 2AGE | SUCCINYL-AAPR-TRYPSIN ACYL-ENZYME AT 1.15 Å RESOLUTION                                                                                                                                    | HYDROLASE                 |
| 2AGG | SUCCINYL-AAPK-TRYPSIN ACYL-ENZYME AT 1.28 Å RESOLUTION                                                                                                                                    | HYDROLASE                 |
| 2AGI | THE LEUPEPTIN-TRYPSIN COVALENT COMPLEX AT 1.14 Å RESOLUTION                                                                                                                               | HYDROLASE                 |
| 2AGJ | CRYSTAL STRUCTURE OF A GLYCOSYLATED FAB FROM AN IGM CRYOGLOBULIN WITH PROPERTIES OF A NATURAL PROTEOLYTIC ANTIBODY                                                                        | IMMUNE SYSTEM             |
| 2AGL | CRYSTAL STRUCTURE OF THE PHENYLHYDRAZINE ADDUCT OF AROMATIC AMINE DEHYDROGENASE FROM ALCALIGENES FAECALIS                                                                                 | OXIDOREDUCTASE            |
| 2AGW | CRYSTAL STRUCTURE OF TRYPTAMINE-REDUCED AROMATIC AMINE DEHYDROGENASE (AADH) FROM ALCALIGENES FAECALIS IN COMPLEX WITH TRYPTAMINE                                                          | OXIDOREDUCTASE            |
| 2AGX | CRYSTAL STRUCTURE OF THE SCHIFF BASE INTERMEDIATE IN THE REDUCTIVE HALF-REACTION OF AROMATIC AMINE DEHYDROGENASE (AADH) WITH TRYPTAMINE. P212121 FORM                                     | OXIDOREDUCTASE            |
| 2AGZ | CRYSTAL STRUCTURE OF THE CARBINOLAMINE INTERMEDIATE IN THE REDUCTIVE HALF-REACTION OF AROMATIC AMINE DEHYDROGENASE (AADH) WITH TRYPTAMINE. F222 FORM                                      | OXIDOREDUCTASE            |
| 2AHJ | NITRILE HYDRATASE COMPLEXED WITH NITRIC OXIDE                                                                                                                                             | LYASE                     |

|      |                                                                                                                                                                                      |                                      |
|------|--------------------------------------------------------------------------------------------------------------------------------------------------------------------------------------|--------------------------------------|
| 2AHK | CRYSTAL STRUCTURE OF THE MET-FORM OF THE COPPER-BOUND STREPTOMYCES CASTANEOGLOBISPORUS TYROSINASE IN COMPLEX WITH A CADDIE PROTEIN OBTAINED BY SOKING IN CUPRIC SULFATE FOR 6 MONTHS | OXIDOREDUCTASE/METAL TRANSPORT       |
| 2AHL | CRYSTAL STRUCTURE OF THE HYDROXYLAMINE-INDUCED DEOXY-FORM OF THE COPPER-BOUND STREPTOMYCES CASTANEOGLOBISPORUS TYROSINASE IN COMPLEX WITH A CADDIE PROTEIN                           | OXIDOREDUCTASE/METAL TRANSPORT       |
| 2AHM | CRYSTAL STRUCTURE OF SARS-COV SUPER COMPLEX OF NON-STRUCTURAL PROTEINS: THE HEXADECAMER                                                                                              | VIRAL PROTEIN, REPLICATION           |
| 2AHO | STRUCTURE OF THE ARCHAEAL INITIATION FACTOR EIF2 ALPHA-GAMMA HETERODIMER FROM SULFOLOBUS SOLFATARICUS COMPLEXED WITH GDPNP                                                           | TRANSLATION                          |
| 2AI0 | ANTI-COCAINE ANTIBODY 7.5.21, CRYSTAL FORM III                                                                                                                                       | IMMUNE SYSTEM                        |
| 2AIG | ADAMALYSIN II WITH PEPTIDOMIMETIC INHIBITOR POL647                                                                                                                                   | COMPLEX (METALLOPROTEASE/INHIBITOR)  |
| 2AIJ | FORMYLGLYCINE GENERATING ENZYME C336S MUTANT COVALENTLY BOUND TO SUBSTRATE PEPTIDE CTPSR                                                                                             | HYDROLASE ACTIVATOR, PROTEIN BINDING |
| 2AIR | T-STATE ACTIVE SITE OF ASPARTATE TRANS-CARBAMYLASE: CRYSTAL STRUCTURE OF THE CARBAMYL PHOSPHATE AND L-ALANOSINE LIGATED ENZYME                                                       | TRANSFERASE                          |
| 2AUH | CRYSTAL STRUCTURE OF THE GRB14 BPS REGION IN COMPLEX WITH THE INSULIN RECEPTOR TYROSINE KINASE                                                                                       | TRANSFERASE/SIGNALING PROTEIN        |
| 2B05 | CRYSTAL STRUCTURE OF 14-3-3 GAMMA IN COMPLEX WITH A PHOSPHOSERINE PEPTIDE                                                                                                            | CELL CYCLE                           |
| 2B0S | CRYSTAL STRUCTURE ANALYSIS OF ANTI-HIV-1 V3 FAB 2219 IN COMPLEX WITH MN PEPTIDE                                                                                                      | IMMUNE SYSTEM                        |
| 2B0U | THE STRUCTURE OF THE FOLLISTATIN:ACTIVIN COMPLEX                                                                                                                                     | SIGNALING PROTEIN                    |
| 2B0Z | CRYSTAL STRUCTURE OF THE PROTEIN-PROTEIN COMPLEX BETWEEN F82I CYTOCHROME C AND CYTOCHROME C PEROXIDASE                                                                               | OXIDOREDUCTASE/ELECTRON TRANSPORT    |
| 2B10 | CRYSTAL STRUCTURE OF THE PROTEIN-PROTEIN COMPLEX BETWEEN F82S CYTOCHROME C AND CYTOCHROME C PEROXIDASE                                                                               | OXIDOREDUCTASE/ELECTRON TRANSPORT    |
| 2B11 | CRYSTAL STRUCTURE OF THE PROTEIN-PROTEIN COMPLEX BETWEEN F82W CYTOCHROME C AND CYTOCHROME C PEROXIDASE                                                                               | OXIDOREDUCTASE/ELECTRON TRANSPORT    |
| 2B12 | CRYSTAL STRUCTURE OF THE PROTEIN-PROTEIN COMPLEX BETWEEN F82Y CYTOCHROME C AND CYTOCHROME C PEROXIDASE                                                                               | OXIDOREDUCTASE/ELECTRON TRANSPORT    |
| 2B1A | CRYSTAL STRUCTURE ANALYSIS OF ANTI-HIV-1 V3 FAB 2219 IN COMPLEX WITH UG1033 PEPTIDE                                                                                                  | IMMUNE SYSTEM                        |
| 2B1H | CRYSTAL STRUCTURE ANALYSIS OF ANTI-HIV-1 V3 FAB 2219 IN COMPLEX WITH UG29 PEPTIDE                                                                                                    | IMMUNE SYSTEM                        |
| 2B1J | CRYSTAL STRUCTURE OF UNPHOSPHORYLATED CHEY BOUND TO THE N-TERMINUS OF FLIM                                                                                                           | SIGNALING PROTEIN                    |
| 2B1N | CRYSTAL STRUCTURE OF A PAPAINE-FOLD PROTEIN WITHOUT THE CATALYTIC CYSTEINE FROM SEEDS OF PACHYRHIZUS EROSUS                                                                          | SUGAR BINDING PROTEIN                |
| 2B1V | HUMAN ESTROGEN RECEPTOR ALPHA LIGAND-BINDING DOMAIN IN COMPLEX WITH OBCP-1M AND A GLUCOCORTICOID RECEPTOR INTERACTING PROTEIN 1 NR BOX II PEPTIDE                                    | HORMONE/GROWTH FACTOR RECEPTOR       |

|      |                                                                                                                                                            |                                |
|------|------------------------------------------------------------------------------------------------------------------------------------------------------------|--------------------------------|
| 2B1X | CRYSTAL STRUCTURE OF NAPHTHALENE 1,2-DIOXYGENASE FROM RHODOCOCCUS SP.                                                                                      | OXIDOREDUCTASE                 |
| 2B1Z | HUMAN ESTROGEN RECEPTOR ALPHA LIGAND-BINDING DOMAIN IN COMPLEX WITH 17METHYL-17ALPHA-DIHYDROEQUILENIN AND A GLUCOC INTERACTING PROTEIN 1 NR BOX II PEPTIDE | HORMONE/GROWTH FACTOR RECEPTOR |
| 2B23 | HUMAN ESTROGEN RECEPTOR ALPHA LIGAND-BINDING DOMAIN AND A GLUCOCORTICOID RECEPTOR-INTERACTING PROTEIN 1 NR BOX II PEPTIDE                                  | HORMONE/GROWTH FACTOR RECEPTOR |
| 2B24 | CRYSTAL STRUCTURE OF NAPHTHALENE 1,2-DIOXYGENASE FROM RHODOCOCCUS SP. BOUND TO INDOLE                                                                      | OXIDOREDUCTASE                 |
| 2B26 | THE CRYSTAL STRUCTURE OF THE PROTEIN COMPLEX OF YEAST HSP40 SIS1 AND HSP70 SSA1                                                                            | CHAPERONE/PROTEIN TRANSPORT    |
| 2B2T | TANDEM CHROMODOMAINS OF HUMAN CHD1 COMPLEXED WITH HISTONE H3 TAIL CONTAINING TRIMETHYLLYSINE 4 AND PHOSPHOTHREONINE 3                                      | PEPTIDE BINDING PROTEIN        |
| 2B2U | TANDEM CHROMODOMAINS OF HUMAN CHD1 COMPLEXED WITH HISTONE H3 TAIL CONTAINING TRIMETHYLLYSINE 4 AND DIMETHYLARGININE 2                                      | PEPTIDE BINDING PROTEIN        |
| 2B2V | CRYSTAL STRUCTURE ANALYSIS OF HUMAN CHD1 CHROMODOMAINS 1 AND 2 BOUND TO HISTONE H3 RESI 1-15 MEK4                                                          | PEPTIDE BINDING PROTEIN        |
| 2B2W | TANDEM CHROMODOMAINS OF HUMAN CHD1 COMPLEXED WITH HISTONE H3 TAIL CONTAINING TRIMETHYLLYSINE 4                                                             | PEPTIDE BINDING PROTEIN        |
| 2B2X | VLA1 RDELTAH I-DOMAIN COMPLEXED WITH A QUADRUPLE MUTANT OF THE AQC2 FAB                                                                                    | IMMUNE SYSTEM                  |
| 2B2Y | TANDEM CHROMODOMAINS OF HUMAN CHD1                                                                                                                         | PEPTIDE BINDING PROTEIN        |
| 2B3G | P53N (FRAGMENT 33-60) BOUND TO RPA70N                                                                                                                      | REPLICATION                    |
| 2B3T | MOLECULAR BASIS FOR BACTERIAL CLASS 1 RELEASE FACTOR METHYLATION BY PRMC                                                                                   | TRANSLATION                    |
| 2B42 | CRYSTAL STRUCTURE OF THE TRITICUM XYLANSE INHIBITOR-1 IN COMPLEX WITH BACILLUS SUBTILIS XYLANASE                                                           | HYDROLASE INHIBITOR/HYDROLASE  |
| 2B4C | CRYSTAL STRUCTURE OF HIV-1 JR-FL GP120 CORE PROTEIN CONTAINING THE THIRD VARIABLE REGION (V3) COMPLEXED WITH CD4 AND THE X5 ANTIBODY                       | VIRAL PROTEIN/IMMUNE SYSTEM    |
| 2B4D | SSAT+COA+SP- SP DISORDERED                                                                                                                                 | TRANSFERASE                    |
| 2B4J | STRUCTURAL BASIS FOR THE RECOGNITION BETWEEN HIV-1 INTEGRASE AND LEDGF/P75                                                                                 | VIRAL PROTEIN, RECOMBINATION   |
| 2B4S | CRYSTAL STRUCTURE OF A COMPLEX BETWEEN PTP1B AND THE INSULIN RECEPTOR TYROSINE KINASE                                                                      | HYDROLASE/TRANSFERASE          |
| 2B59 | THE TYPE II COHESIN DOCKERIN COMPLEX                                                                                                                       | HYDROLASE/STRUCTURAL PROTEIN   |
| 2B5G | WILD TYPE SSAT- 1.7A STRUCTURE                                                                                                                             | TRANSFERASE                    |
| 2B5I | CYTOKINE RECEPTOR COMPLEX                                                                                                                                  | CYTOKINE/CYTOKINE RECEPTOR     |
| 2B5J | CRYSTAL STRUCTURE OF HIV-1 REVERSE TRANSCRIPTASE (RT) IN COMPLEX WITH JANSSEN-R165481                                                                      | TRANSFERASE                    |
| 2B5L | CRYSTAL STRUCTURE OF DDB1 IN COMPLEX WITH SIMIAN VIRUS 5 V                                                                                                 | PROTEIN BINDING/VIRAL PROTEIN  |

| PROTEIN |                                                                                                                                                                                                                                                                                                                                                                                |                               |
|---------|--------------------------------------------------------------------------------------------------------------------------------------------------------------------------------------------------------------------------------------------------------------------------------------------------------------------------------------------------------------------------------|-------------------------------|
| 2B5R    | 1B LACTAMASE / B LACTAMASE INHIBITOR                                                                                                                                                                                                                                                                                                                                           | HYDROLASE/HYDROLASE INHIBITOR |
| 2B5T    | 2.1 ANGSTROM STRUCTURE OF A NONPRODUCTIVE COMPLEX BETWEEN ANTITHROMBIN, SYNTHETIC HEPARIN MIMETIC SR123781 AND TWO S195A THROMBIN MOLECULES                                                                                                                                                                                                                                    | BLOOD CLOTTING                |
| 2B5U    | CRYSTAL STRUCTURE OF COLICIN E3 V206C MUTANT IN COMPLEX WITH ITS IMMUNITY PROTEIN                                                                                                                                                                                                                                                                                              | RIBOSOME INHIBITOR, HYDROLASE |
| 2B63    | COMPLETE RNA POLYMERASE II-RNA INHIBITOR COMPLEX                                                                                                                                                                                                                                                                                                                               | TRANSFERASE/RNA               |
| 2B64    | 30S RIBOSOMAL SUBUNIT, TRNAS, MRNA AND RELEASE FACTOR RF1 FROM A CRYSTAL STRUCTURE OF THE WHOLE RIBOSOMAL COMPLEX. THIS FILE CONTAINS THE 30S SUBUNIT, TRNAS, MRNA AND RELEASE FACTOR RF1 FROM A CRYSTAL STRUCTURE OF THE WHOLE RIBOSOMAL COMPLEX". THE ENTIRE CRYSTAL STRUCTURE CONTAINS ONE 70S RIBOSOME, TRNAS, MRNA AND RELEASE FACTOR RF1 AND IS DESCRIBED IN REMARK 400. | RIBOSOME                      |
| 2B66    | 50S RIBOSOMAL SUBUNIT FROM A CRYSTAL STRUCTURE OF RELEASE FACTOR RF1, TRNAS AND MRNA BOUND TO THE RIBOSOME. THIS FILE CONTAINS THE 50S SUBUNIT FROM A CRYSTAL STRUCTURE OF RELEASE FACTOR RF1, TRNAS AND MRNA BOUND TO THE RIBOSOME AND IS DESCRIBED IN REMARK 400                                                                                                             | RIBOSOME                      |
| 2B6A    | CRYSTAL STRUCTURE OF HIV-1 REVERSE TRANSCRIPTASE (RT) IN COMPLEX WITH THR-50                                                                                                                                                                                                                                                                                                   | TRANSFERASE                   |
| 2B6N    | THE 1.8 A CRYSTAL STRUCTURE OF A PROTEINASE K LIKE ENZYME FROM A PSYCHROTROPH SERRATIA SPECIES                                                                                                                                                                                                                                                                                 | HYDROLASE                     |
| 2B76    | E. COLI QUINOL FUMARATE REDUCTASE FRDA E49Q MUTATION                                                                                                                                                                                                                                                                                                                           | OXIDOREDUCTASE                |
| 2B7B    | YEAST GUANINE NUCLEOTIDE EXCHANGE FACTOR EEF1BALPHA K205A MUTANT IN COMPLEX WITH EEF1A AND GDP                                                                                                                                                                                                                                                                                 | TRANSLATION                   |
| 2B7C    | YEAST GUANINE NUCLEOTIDE EXCHANGE FACTOR EEF1BALPHA K205A MUTANT IN COMPLEX WITH EEF1A                                                                                                                                                                                                                                                                                         | TRANSLATION                   |
| 2B7F    | CRYSTAL STRUCTURE OF HUMAN T-CELL LEUKEMIA VIRUS PROTEASE, A NOVEL TARGET FOR ANTI-CANCER DESIGN                                                                                                                                                                                                                                                                               | HYDROLASE                     |
| 2B7H    | HEMOGLOBIN FROM CERDOCYON THOUS, A CANIDAE FROM BRAZIL, AT 2.2 ANGSTROMS RESOLUTION                                                                                                                                                                                                                                                                                            | OXYGEN STORAGE/TRANSPORT      |
| 2B7Y    | FAVA BEAN LECTIN-GLUCOSE COMPLEX                                                                                                                                                                                                                                                                                                                                               | LECTIN                        |
| 2B8K    | 12-SUBUNIT RNA POLYMERASE II                                                                                                                                                                                                                                                                                                                                                   | TRANSFERASE                   |
| 2B8O    | CRYSTAL STRUCTURE OF GLU-GLY-ARG-CHLOROMETHYL KETONE-FACTOR VIIIA/SOLUBLE TISSUE FACTOR COMPLEX                                                                                                                                                                                                                                                                                | HYDROLASE/HYDROLASE INHIBITOR |
| 2B9H    | CRYSTAL STRUCTURE OF FUS3 WITH A DOCKING MOTIF FROM STE7                                                                                                                                                                                                                                                                                                                       | TRANSFERASE                   |
| 2B9I    | CRYSTAL STRUCTURE OF FUS3 WITH A DOCKING MOTIF FROM MSG5                                                                                                                                                                                                                                                                                                                       | TRANSFERASE                   |
| 2B9J    | CRYSTAL STRUCTURE OF FUS3 WITH A DOCKING MOTIF FROM FAR1                                                                                                                                                                                                                                                                                                                       | TRANSFERASE                   |
| 2B9M    | 30S RIBOSOMAL SUBUNIT, TRNAS, MRNA AND RELEASE FACTOR RF2 FROM A CRYSTAL STRUCTURE OF THE WHOLE RIBOSOMAL COMPLEX. THIS FILE CONTAINS THE 30S RIBOSOMAL SUBUNIT, TRNAS, MRNA AND RELEASE FACTOR RF2 FROM A CRYSTAL STRUCTURE OF THE WHOLE RIBOSOMAL COMPLEX". THE ENTIRE CRYSTAL STRUCTURE                                                                                     | RIBOSOME                      |



|      |                                                                                                                                                                                                                                                                                                           |                                  |
|------|-----------------------------------------------------------------------------------------------------------------------------------------------------------------------------------------------------------------------------------------------------------------------------------------------------------|----------------------------------|
|      | CONTAINS ONE 70S RIBOSOME, TRNAS, MRNA AND RELEASE FACTOR RF2 AND IS DESCRIBED IN REMARK 400.                                                                                                                                                                                                             |                                  |
| 2B9N | 50S RIBOSOMAL SUBUNIT FROM A CRYSTAL STRUCTURE OF RELEASE FACTOR RF2, TRNAS AND MRNA BOUND TO THE RIBOSOME. THIS FILE CONTAINS THE 50S SUBUNIT FROM A CRYSTAL STRUCTURE OF RELEASE FACTOR RF1, TRNAS AND MRNA BOUND TO THE RIBOSOME AND IS DESCRIBED IN REMARK 400.                                       | RIBOSOME                         |
| 2B9O | 30S RIBOSOMAL SUBUNIT, TRNAS AND MRNA FROM A CRYSTAL STRUCTURE OF THE WHOLE RIBOSOMAL COMPLEX WITH A STOP CODON IN THE A-SITE. THIS FILE CONTAINS THE 30S SUBUNIT, TRNAS AND MRNA FROM A CRYSTAL STRUCTURE OF THE WHOLE RIBOSOMAL COMPLEX WITH A STOP CODON IN THE A-SITE AND IS DESCRIBED IN REMARK 400. | RIBOSOME                         |
| 2B9P | 50S RIBOSOMAL SUBUNIT FROM A CRYSTAL STRUCTURE OF THE RIBOSOME IN COMPLEX WITH TRNAS AND MRNA WITH A STOP CODON IN THE A-SITE. THIS FILE CONTAINS THE 50S SUBUNIT FROM A CRYSTAL STRUCTURE OF THE RIBOSOME IN COMPLEX WITH TRNAS AND MRNA WITH A STOP CODON IN THE A-SITE AND IS DESCRIBED IN REMARK 400. | RIBOSOME                         |
| 2B9S | CRYSTAL STRUCTURE OF HETERODIMERIC L. DONOVANI TOPOISOMERASE I-VANADATE-DNA COMPLEX                                                                                                                                                                                                                       | ISOMERASE/DNA                    |
| 2BA0 | ARCHAEAL EXOSOME CORE                                                                                                                                                                                                                                                                                     | RNA BINDING PROTEIN              |
| 2BA1 | ARCHAEAL EXOSOME CORE                                                                                                                                                                                                                                                                                     | RNA BINDING PROTEIN              |
| 2BAN | CRYSTAL STRUCTURE OF HIV-1 REVERSE TRANSCRIPTASE (RT) IN COMPLEX WITH JANSSEN-R157208                                                                                                                                                                                                                     | TRANSFERASE                      |
| 2BAP | CRYSTAL STRUCTURE OF THE N-TERMINAL MDIA1 ARMADILLO REPEAT REGION AND DIMERISATION DOMAIN IN COMPLEX WITH THE MDIA1 AUTOREGULATORY DOMAIN (DAD)                                                                                                                                                           | SIGNALING PROTEIN                |
| 2BBA | CRYSTAL STRUCTURE AND THERMODYNAMIC CHARACTERIZATION OF THE EPHB4 RECEPTOR IN COMPLEX WITH AN EPHRIN-B2 ANTAGONIST PEPTIDE REVEALS THE DETERMINANTS FOR RECEPTOR SPECIFICITY                                                                                                                              | SIGNALING PROTEIN                |
| 2BBM | SOLUTION STRUCTURE OF A CALMODULIN-TARGET PEPTIDE COMPLEX BY MULTIDIMENSIONAL NMR                                                                                                                                                                                                                         | CALCIUM-BINDING PROTEIN          |
| 2BBV | THE REFINED THREE-DIMENSIONAL STRUCTURE OF AN INSECT VIRUS AT 2.8 ANGSTROMS RESOLUTION                                                                                                                                                                                                                    | VIRUS/RNA                        |
| 2BC4 | CRYSTAL STRUCTURE OF HLA-DM                                                                                                                                                                                                                                                                               | IMMUNE SYSTEM                    |
| 2BCC | STIGMATELLIN-BOUND CYTOCHROME BC1 COMPLEX FROM CHICKEN                                                                                                                                                                                                                                                    | OXIDOREDUCTASE                   |
| 2BCG | STRUCTURE OF DOUBLY PRENYLATED YPT1:GDI COMPLEX                                                                                                                                                                                                                                                           | PROTEIN TRANSPORT                |
| 2BCJ | CRYSTAL STRUCTURE OF G PROTEIN-COUPLED RECEPTOR KINASE 2 IN COMPLEX WITH GALPHA-Q AND GBETAGAMMA SUBUNITS                                                                                                                                                                                                 | TRANSFERASE/HYDROLASE            |
| 2BCN | SOLVENT ISOTOPE EFFECTS ON INTERFACIAL PROTEIN ELECTRON TRANSFER BETWEEN CYTOCHROME C AND CYTOCHROME C PEROXIDASE                                                                                                                                                                                         | OXIDOREDUCTASE/ELECTRON TRANSFER |
| 2BCX | CRYSTAL STRUCTURE OF CALMODULIN IN COMPLEX WITH A RYANODINE RECEPTOR PEPTIDE                                                                                                                                                                                                                              | CALCIUM BINDING PROTEIN          |
| 2BDN | CRYSTAL STRUCTURE OF HUMAN MCP-1 BOUND TO A BLOCKING ANTIBODY, 11K2                                                                                                                                                                                                                                       | IMMUNE SYSTEM                    |

|      |                                                                                                                                                |                                         |
|------|------------------------------------------------------------------------------------------------------------------------------------------------|-----------------------------------------|
| 2BE1 | STRUCTURE OF THE COMPACT LUMENAL DOMAIN OF YEAST IRE1                                                                                          | TRANSCRIPTION                           |
| 2BE2 | CRYSTAL STRUCTURE OF HIV-1 REVERSE TRANSCRIPTASE (RT) IN COMPLEX WITH R221239                                                                  | TRANSFERASE                             |
| 2BE5 | CRYSTAL STRUCTURE OF THE T. THERMOPHILUS RNA POLYMERASE HOLOENZYME IN COMPLEX WITH INHIBITOR TAGETITOXIN                                       | TRANSFERASE                             |
| 2BE6 | 2.0 Å CRYSTAL STRUCTURE OF THE CAV1.2 IQ DOMAIN-CA/CAM COMPLEX                                                                                 | MEMBRANE PROTEIN                        |
| 2BE7 | CRYSTAL STRUCTURE OF THE UNLIGANDED (T-STATE) ASPARTATE TRANSCARBAMOYLASE OF THE PSYCHROPHILIC BACTERIUM MORITELLA PROFUNDA                    | TRANSFERASE                             |
| 2BE9 | CRYSTAL STRUCTURE OF THE CTP-LIGANDED (T-STATE) ASPARTATE TRANSCARBAMOYLASE FROM THE EXTREMELY THERMOPHILIC ARCHAEON SULFOLOBUS ACIDOCALDARIUS | TRANSFERASE                             |
| 2BEC | CRYSTAL STRUCTURE OF CHP2 IN COMPLEX WITH ITS BINDING REGION IN NHE1 AND INSIGHTS INTO THE MECHANISM OF PH REGULATION                          | METAL BINDING PROTEIN/TRANSPORT PROTEIN |
| 2BED | STRUCTURE OF FPT BOUND TO INHIBITOR SCH207736                                                                                                  | TRANSFERASE                             |
| 2BEQ | STRUCTURE OF A PROTEOLYTICALLY RESISTANT CORE FROM THE SEVERE ACUTE RESPIRATORY SYNDROME CORONAVIRUS S2 FUSION PROTEIN                         | VIRAL PROTEIN                           |
| 2BEU | REACTIVITY MODULATION OF HUMAN BRANCHED-CHAIN ALPHA-KETOACID DEHYDROGENASE BY AN INTERNAL MOLECULAR SWITCH                                     | OXIDOREDUCTASE                          |
| 2BEV | REACTIVITY MODULATION OF HUMAN BRANCHED-CHAIN ALPHA-KETOACID DEHYDROGENASE BY AN INTERNAL MOLECULAR SWITCH                                     | OXIDOREDUCTASE                          |
| 2BEW | REACTIVITY MODULATION OF HUMAN BRANCHED-CHAIN ALPHA-KETOACID DEHYDROGENASE BY AN INTERNAL MOLECULAR SWITCH                                     | OXIDOREDUCTASE                          |
| 2BEX | CRYSTAL STRUCTURE OF PLACENTAL RIBONUCLEASE INHIBITOR IN COMPLEX WITH HUMAN EOSINOPHIL DERIVED NEUROTOXIN AT 2 Å RESOLUTION                    | COMPLEX (INHIBITOR/NUCLEASE)            |
| 2BEZ | STRUCTURE OF A PROTEOLITICALLY RESISTANT CORE FROM THE SEVERE ACUTE RESPIRATORY SYNDROME CORONAVIRUS S2 FUSION PROTEIN                         | VIRAL PROTEIN                           |
| 2BF3 | CRYSTAL STRUCTURE OF A TOLUENE 4-MONOOXYGENASE CATALYTIC EFFECTOR PROTEIN VARIANT MISSING TEN N-TERMINAL RESIDUES (DELTA-N10 T4MOD)            | OXIDOREDUCTASE                          |
| 2BF8 | CRYSTAL STRUCTURE OF SUMO MODIFIED UBIQUITIN CONJUGATING ENZYME E2-25K                                                                         | LIGASE/COMPLEX                          |
| 2BFB | REACTIVITY MODULATION OF HUMAN BRANCHED-CHAIN ALPHA-KETOACID DEHYDROGENASE BY AN INTERNAL MOLECULAR SWITCH                                     | OXIDOREDUCTASE                          |
| 2BFC | REACTIVITY MODULATION OF HUMAN BRANCHED-CHAIN ALPHA-KETOACID DEHYDROGENASE BY AN INTERNAL MOLECULAR SWITCH                                     | OXIDOREDUCTASE                          |
| 2BFD | REACTIVITY MODULATION OF HUMAN BRANCHED-CHAIN ALPHA-KETOACID DEHYDROGENASE BY AN INTERNAL MOLECULAR SWITCH                                     | OXIDOREDUCTASE                          |
| 2BFE | REACTIVITY MODULATION OF HUMAN BRANCHED-CHAIN ALPHA-KETOACID DEHYDROGENASE BY AN INTERNAL MOLECULAR SWITCH                                     | OXIDOREDUCTASE                          |

|      |                                                                                                                                                                                     |                                      |
|------|-------------------------------------------------------------------------------------------------------------------------------------------------------------------------------------|--------------------------------------|
| 2BFF | REACTIVITY MODULATION OF HUMAN BRANCHED-CHAIN ALPHA-KETOACID DEHYDROGENASE BY AN INTERNAL MOLECULAR SWITCH                                                                          | OXIDOREDUCTASE                       |
| 2BFU | X-RAY STRUCTURE OF CPMV TOP COMPONENT                                                                                                                                               | VIRUS                                |
| 2BFX | MECHANISM OF AURORA-B ACTIVATION BY INCENP AND INHIBITION BY HESPERIDIN.                                                                                                            | TRANSFERASE COMPLEX                  |
| 2BFZ | BACILLUS CEREUS METALLO-BETA-LACTAMASE (BCII) ARG (121) CYS MUTANT. SOLVED AT PH4.5 USING 20MM ZNSO4 IN BUFFER. 1MM DTT WAS USED AS A REDUCING AGENT. CYS221 IS OXIDIZED.           | HYDROLASE                            |
| 2BG8 | BACILLUS CEREUS METALLO-BETA-LACTAMASE (BCII) ARG (121) CYS MUTANT. SOLVED AT PH4.5 USING 20 MICROMOLAR ZNSO4 IN THE BUFFER. 1MM DTT AND 1MM TCEP-HCL WERE USED AS REDUCING AGENTS. | HYDROLASE                            |
| 2BG9 | REFINED STRUCTURE OF THE NICOTINIC ACETYLCHOLINE RECEPTOR AT 4A RESOLUTION.                                                                                                         | ION CHANNEL/RECEPTOR                 |
| 2BGN | HIV-1 TAT PROTEIN DERIVED N-TERMINAL NONAPEPTIDE TRP2-TAT (1-9) BOUND TO THE ACTIVE SITE OF DIPEPTIDYL PEPTIDASE IV (CD26)                                                          | HYDROLASE/COMPLEX                    |
| 2BGR | CRYSTAL STRUCTURE OF HIV-1 TAT DERIVED NONAPEPTIDES TAT(1-9) BOUND TO THE ACTIVE SITE OF DIPEPTIDYL PEPTIDASE IV (CD26)                                                             | HYDROLASE/COMPLEX                    |
| 2BH1 | X-RAY STRUCTURE OF THE GENERAL SECRETION PATHWAY COMPLEX OF THE N-TERMINAL DOMAIN OF EPSE AND THE CYTOSOLIC DOMAIN OF EPSL OF VIBRIO CHOLERAE                                       | TRANSPORT PROTEIN                    |
| 2BIL | THE HUMAN PROTEIN KINASE PIM1 IN COMPLEX WITH ITS CONSENSUS PEPTIDE PIMTIDE                                                                                                         | TRANSFERASE                          |
| 2BJ4 | ESTROGEN RECEPTOR ALPHA LBD IN COMPLEX WITH A PHAGE-DISPLAY DERIVED PEPTIDE ANTAGONIST                                                                                              | NUCLEAR RECEPTOR                     |
| 2BKH | MYOSIN VI NUCLEOTIDE-FREE (MDINSERT2) CRYSTAL STRUCTURE                                                                                                                             | COMPLEX (MOTOR PROTEIN/CALMODULIN)   |
| 2BK1 | MYOSIN VI NUCLEOTIDE-FREE (MDINSERT2-IQ) CRYSTAL STRUCTURE                                                                                                                          | COMPLEX (MOTOR PROTEIN/CALMODULIN)   |
| 2BKK | CRYSTAL STRUCTURE OF AMINOGLYCOSIDE PHOSPHOTRANSFERASE APH (3')-IIIA IN COMPLEX WITH THE INHIBITOR AR_3A                                                                            | TRANSFERASE/DESIGNED PROTEIN COMPLEX |
| 2BKR | NEDD8 NEDP1 COMPLEX                                                                                                                                                                 | UBIQUITIN/HYDROLASE COMPLEX          |
| 2BKU | KAP95P:RANGTP COMPLEX                                                                                                                                                               | NUCLEAR TRANSPORT                    |
| 2BKY | CRYSTAL STRUCTURE OF THE ALBA1:ALBA2 HETERODIMER FROM SULFOLOBUS SOLFATARICUS                                                                                                       | DNA BINDING PROTEIN                  |
| 2BKZ | STRUCTURE OF CDK2-CYCLIN A WITH PHA-404611                                                                                                                                          | TRANSFERASE/COMPLEX                  |
| 2BL0 | PHYSARUM POLYCEPHALUM MYOSIN II REGULATORY DOMAIN                                                                                                                                   | MUSCLE PROTEIN                       |
| 2BLD | THE QUASI-ATOMIC MODEL OF HUMAN ADENOVIRUS TYPE 5 CAPSID (PART 1)                                                                                                                   | ADENOVIRUS                           |
| 2BLF | SULFITE DEHYDROGENASE FROM STARKEYA NOVELLA                                                                                                                                         | OXIDOREDUCTASE                       |
| 2BMG | CRYSTAL STRUCTURE OF FACTOR XA IN COMPLEX WITH 50                                                                                                                                   | HYDROLASE                            |
| 2BMK | FAB FRAGMENT OF PLP-DEPENDENT CATALYTIC ANTIBODY 15A9 IN COMPLEX WITH PHOSPHOPYRIDOXYL-D-ALANINE                                                                                    | IMMUNE SYSTEM                        |

|      |                                                                                                  |                                |
|------|--------------------------------------------------------------------------------------------------|--------------------------------|
| 2BMO | THE CRYSTAL STRUCTURE OF NITROBENZENE DIOXYGENASE                                                | OXIDOREDUCTASE                 |
| 2BMQ | THE CRYSTAL STRUCTURE OF NITROBENZENE DIOXYGENASE IN COMPLEX WITH NITROBENZENE                   | OXIDOREDUCTASE                 |
| 2BMR | THE CRYSTAL STRUCTURE OF NITROBENZENE DIOXYGENASE IN COMPLEX WITH 3-NITROTOLUENE                 | OXIDOREDUCTASE                 |
| 2BN1 | INSULIN AFTER A HIGH DOSE X-RAY BURN                                                             | RADIATION DAMAGE               |
| 2BN2 | CRYSTAL STRUCTURE OF BOVINE NEUROPHYSIN II COMPLEXED WITH THE VASOPRESSIN ANALOGUE PHE-TYR AMIDE | COMPLEX (PROTEIN/PEPTIDE)      |
| 2BN3 | INSULIN BEFORE A HIGH DOSE X-RAY BURN                                                            | RADIATION DAMAGE               |
| 2BNP | LIPIDIC CUBIC PHASE GROWN REACTION CENTRE FROM RHODOBACTER SPHAEROIDES, GROUND STATE             | REACTION CENTRE                |
| 2BNQ | STRUCTURAL AND KINETIC BASIS FOR HEIGHTENED IMMUNOGENICITY OF T CELL VACCINES                    | IMMUNE SYSTEM/RECEPTOR/COMPLEX |
| 2BNR | STRUCTURAL AND KINETIC BASIS FOR HEIGHTENED IMMUNOGENICITY OF T CELL VACCINES                    | IMMUNE SYSTEM/RECEPTOR/COMPLEX |
| 2BNS | LIPIDIC CUBIC PHASE GROWN REACTION CENTRE FROM RHODOBACTER SPHAEROIDES, EXCITED STATE            | REACTION CENTRE                |
| 2BNU | STRUCTURAL AND KINETIC BASIS FOR HEIGHTENED IMMUNOGENICITY OF T CELL VACCINES                    | IMMUNE SYSTEM/RECEPTOR         |
| 2BO9 | HUMAN CARBOXYPEPTIDASE A4 IN COMPLEX WITH HUMAN LATEXIN.                                         | HYDROLASE                      |
| 2BOB | POTASSIUM CHANNEL KCSA-FAB COMPLEX IN THALLIUM WITH TETRABUTYLAMMONIUM (TBA)                     | COMPLEX (ANTIBODY/ION CHANNEL) |
| 2BOC | POTASSIUM CHANNEL KCSA-FAB COMPLEX IN THALLIUM WITH TETRAETHYLARSONIUM (TEAS)                    | COMPLEX (ANTIBODY/ION CHANNEL) |
| 2BOV | MOLECULAR RECOGNITION OF AN ADP-RIBOSYLATING CLOSTRIDIUM BOTULINUM C3 EXOENZYME BY RALA GTPASE   | TRANSFERASE                    |
| 2BOZ | PHOTOSYNTHETIC REACTION CENTER MUTANT WITH GLY M203 REPLACED WITH LEU                            | REACTION CENTER                |
| 2BP0 | M168L MUTANT OF NITRITE REDUCTASE FROM ALCALIGENES XYLOSOXIDANS                                  | OXIDOREDUCTASE                 |
| 2BP7 | NEW CRYSTAL FORM OF THE PSEUDOMONAS PUTIDA BRANCHED-CHAIN DEHYDROGENASE (E1)                     | OXIDOREDUCTASE                 |
| 2BP8 | M168Q STRUCTURE OF NITRITE REDUCTASE FROM ALCALIGENES XYLOSOXIDANS                               | OXIDOREDUCTASE                 |
| 2BPB | SULFITE DEHYDROGENASE FROM STARKEYA NOVELLA                                                      | OXIDOREDUCTASE                 |
| 2BPM | STRUCTURE OF CDK2-CYCLIN A WITH PHA-630529                                                       | TRANSFERASE                    |
| 2BPT | STRUCTURE OF THE NUP1P:KAP95P COMPLEX                                                            | NUCLEAR TRANSPORT              |
| 2BQ1 | RIBONUCLEOTIDE REDUCTASE CLASS 1B HOLOCOMPLEX R1E,R2F FROM SALMONELLA TYPHIMURIUM                | OXIDOREDUCTASE                 |
| 2BQ6 | CRYSTAL STRUCTURE OF FACTOR XA IN COMPLEX WITH 21                                                | HYDROLASE                      |

|      |                                                                                                                                     |                                       |
|------|-------------------------------------------------------------------------------------------------------------------------------------|---------------------------------------|
| 2BQ7 | CRYSTAL STRUCTURE OF FACTOR XA IN COMPLEX WITH 43                                                                                   | HYDROLASE                             |
| 2BQW | CRYSTAL STRUCTURE OF FACTOR XA IN COMPLEX WITH COMPOUND 45                                                                          | HYDROLASE                             |
| 2BQZ | CRYSTAL STRUCTURE OF A TERNARY COMPLEX OF THE HUMAN HISTONE METHYLTRANSFERASE PR-SET7 (ALSO KNOWN AS SET8)                          | TRANSFERASE                           |
| 2BR2 | RNASE PH CORE OF THE ARCHAEAL EXOSOME                                                                                               | HYDROLASE                             |
| 2BR8 | CRYSTAL STRUCTURE OF ACETYLCHOLINE-BINDING PROTEIN (ACHBP) FROM APLYSIA CALIFORNICA IN COMPLEX WITH AN ALPHA-CONOTOXIN PNIA VARIANT | RECEPTOR/INHIBITOR COMPLEX            |
| 2BR9 | 14-3-3 PROTEIN EPSILON (HUMAN) COMPLEXED TO PEPTIDE                                                                                 | CELL REGULATOR PROTEIN                |
| 2BRR | COMPLEX OF THE NEISSERIAL PORA P1.4 EPITOPE PEPTIDE AND TWO FAB-FRAGMENTS (ANTIBODY MN20B9.34)                                      | ANTIBODY/ANTIGEN COMPLEX              |
| 2BS3 | GLU C180-> GLN VARIANT QUINOL:FUMARATE REDUCTASE FROM WOLINELLA SUCCINOGENES                                                        | OXIDOREDUCTASE                        |
| 2BS4 | GLU C180-> ILE VARIANT QUINOL:FUMARATE REDUCTASE FROM WOLINELLA SUCCINOGENES                                                        | OXIDOREDUCTASE                        |
| 2BSK | CRYSTAL STRUCTURE OF THE TIM9 TIM10 HEXAMERIC COMPLEX                                                                               | PROTEIN TRANSPORT                     |
| 2BSQ | FITAB BOUND TO DNA                                                                                                                  | TRANSCRIPTION REGULATION COMPLEX      |
| 2BSR | CRYSTAL STRUCTURES AND KIR3DL1 RECOGNITION OF THREE IMMUNODOMINANT VIRAL PEPTIDES COMPLEXED TO HLA-B2705                            | COMPLEX (ANTIGEN/PEPTIDE)             |
| 2BSS | CRYSTAL STRUCTURES AND KIR3DL1 RECOGNITION OF THREE IMMUNODOMINANT VIRAL PEPTIDES COMPLEXED TO HLA-B2705                            | COMPLEX (ANTIGEN/PEPTIDE)             |
| 2BST | CRYSTAL STRUCTURES AND KIR3DL1 RECOGNITION OF THREE IMMUNODOMINANT VIRAL PEPTIDES COMPLEXED TO HLA-B2705                            | COMPLEX (ANTIGEN/PEPTIDE)             |
| 2BTF | THE STRUCTURE OF CRYSTALLINE PROFILIN-BETA-ACTIN                                                                                    | ACETYLATION AND ACTIN-BINDING         |
| 2BTO | STRUCTURE OF BTUBA FROM PROSTHECOBACTER DEJONGEII                                                                                   | CYTOSKELETAL PROTEIN                  |
| 2BTP | 14-3-3 PROTEIN THETA (HUMAN) COMPLEXED TO PEPTIDE                                                                                   | COMPLEX (SIGNAL TRANSDUCTION/PEPTIDE) |
| 2BTQ | STRUCTURE OF BTUBAB HETERODIMER FROM PROSTHECOBACTER DEJONGEII                                                                      | CYTOSKELETAL PROTEIN/COMPLEX          |
| 2BTV | ATOMIC MODEL FOR BLUETONGUE VIRUS (BTV) CORE                                                                                        | VIRUS                                 |
| 2BTW | CRYSTAL STRUCTURE OF ALR0975                                                                                                        | TRANSFERASE                           |
| 2BUM | CRYSTAL STRUCTURE OF WILD-TYPE PROTOCATECHUATE 3,4-DIOXYGENASE FROM ACINETOBACTER SP. ADP1                                          | OXIDOREDUCTASE                        |
| 2BUO | HIV-1 CAPSID C-TERMINAL DOMAIN IN COMPLEX WITH AN INHIBITOR OF PARTICLE ASSEMBLY                                                    | VIRAL PROTEIN/PEPTIDE                 |
| 2BUQ | CRYSTAL STRUCTURE OF WILD-TYPE PROTOCATECHUATE 3,4-DIOXYGENASE FROM ACINETOBACTER SP. ADP1 IN COMPLEX WITH CATECHOL                 | OXIDOREDUCTASE                        |
| 2BUR | CRYSTAL STRUCTURE OF WILD-TYPE PROTOCATECHUATE 3,4-DIOXYGENASE FROM ACINETOBACTER SP. ADP1 IN COMPLEX WITH 4-HYDROXYBENZOATE        | OXIDOREDUCTASE                        |
| 2BUT | CRYSTAL STRUCTURE OF PROTOCATECHUATE 3,4-DIOXYGENASE FROM                                                                           | OXIDOREDUCTASE                        |

## ACINETOBACTER SP. ADP1 MUTANT R457S- APO

|      |                                                                                                                                                |                              |
|------|------------------------------------------------------------------------------------------------------------------------------------------------|------------------------------|
| 2BUU | CRYSTAL STRUCTURE OF PROTOCATECHUATE 3,4-DIOXYGENASE FROM ACINETOBACTER SP. ADP1 MUTANT R457S IN COMPLEX WITH 4-NITROCATÉCHOL                  | OXIDOREDUCTASE               |
| 2BUV | CRYSTAL STRUCTURE OF PROTOCATECHUATE 3,4-DIOXYGENASE FROM ACINETOBACTER SP. ADP1 MUTANT R457S IN COMPLEX WITH PROTOCATECHUATE                  | OXIDOREDUCTASE               |
| 2BUW | CRYSTAL STRUCTURE OF PROTOCATECHUATE 3,4-DIOXYGENASE FROM ACINETOBACTER SP. ADP1 MUTANT R457S IN COMPLEX WITH 4-HYDROXYBENZOATE                | OXIDOREDUCTASE               |
| 2BUX | CRYSTAL STRUCTURE OF PROTOCATECHUATE 3,4-DIOXYGENASE FROM ACINETOBACTER SP. ADP1 MUTANT R133H                                                  | OXIDOREDUCTASE               |
| 2BUY | CRYSTAL STRUCTURE OF PROTOCATECHUATE 3,4-DIOXYGENASE FROM ACINETOBACTER SP. ADP1 MUTANT R133H IN COMPLEX WITH CATECHOL                         | OXIDOREDUCTASE               |
| 2BUZ | CRYSTAL STRUCTURE OF PROTOCATECHUATE 3,4-DIOXYGENASE FROM ACINETOBACTER SP. ADP1 MUTANT R133H IN COMPLEX WITH 4-NITROCATÉCHOL                  | OXIDOREDUCTASE               |
| 2BV0 | CRYSTAL STRUCTURE OF PROTOCATECHUATE 3,4-DIOXYGENASE FROM ACINETOBACTER SP. ADP1 MUTANT R133H IN COMPLEX WITH PROTOCATECHUATE.                 | OXIDOREDUCTASE               |
| 2BV8 | THE CRYSTAL STRUCTURE OF PHYCOCYANIN FROM GRACILARIA CHILENSIS.                                                                                | PHOTOSYNTHESIS               |
| 2BVO | STRUCTURES OF THREE HIV-1 HLA-B5703-PEPTIDE COMPLEXES AND IDENTIFICATION OF RELATED HLAS POTENTIALLY ASSOCIATED WITH LONG-TERM NON-PROGRESSION | GLYCOPROTEIN/PEPTIDE COMPLEX |
| 2BVP | STRUCTURES OF THREE HIV-1 HLA-B5703-PEPTIDE COMPLEXES AND IDENTIFICATION OF RELATED HLAS POTENTIALLY ASSOCIATED WITH LONG-TERM NON-PROGRESSION | GLYCOPROTEIN/PEPTIDE COMPLEX |
| 2BW3 | THREE-DIMENSIONAL STRUCTURE OF THE HERMES DNA TRANSPOSASE                                                                                      | DNA RECOMBINATION            |
| 2BWE | THE CRYSTAL STRUCTURE OF THE COMPLEX BETWEEN THE UBA AND UBL DOMAINS OF DSK2                                                                   | SIGNALING PROTEIN            |
| 2BWO | 5-AMINOLEVULINATE SYNTHASE FROM RHODOBACTER CAPSULATUS IN COMPLEX WITH SUCCINYL-COA                                                            | TRANSFERASE                  |
| 2BYK | HISTONE FOLD HETERODIMER OF THE CHROMATIN ACCESSIBILITY COMPLEX                                                                                | DNA-BINDING PROTEIN          |
| 2BYM | HISTONE FOLD HETERODIMER OF THE CHROMATIN ACCESSIBILITY COMPLEX                                                                                | DNA-BINDING PROTEIN          |
| 2BYP | CRYSTAL STRUCTURE OF APLYSIA CALIFORNICA ACHBP IN COMPLEX WITH ALPHA-CONOTOXIN IMI                                                             | RECEPTOR COMPLEX             |
| 2BZ6 | ORALLY AVAILABLE FACTOR7A INHIBITOR                                                                                                            | HYDROLASE                    |
| 2BZK | CRYSTAL STRUCTURE OF THE HUMAN PIM1 IN COMPLEX WITH AMPPNP AND PIMTIDE                                                                         | COMPLEX TRANSFERASE/PEPTIDE  |
| 2BZW | THE CRYSTAL STRUCTURE OF BCL-XL IN COMPLEX WITH FULL-LENGTH BAD                                                                                | TRANSCRIPTION COMPLEX        |

|      |                                                                                                                                                            |                                   |
|------|------------------------------------------------------------------------------------------------------------------------------------------------------------|-----------------------------------|
| 2B05 | CRYSTAL STRUCTURE OF 14-3-3 GAMMA IN COMPLEX WITH A PHOSPHOSERINE PEPTIDE                                                                                  | CELL CYCLE                        |
| 2B0S | CRYSTAL STRUCTURE ANALYSIS OF ANTI-HIV-1 V3 FAB 2219 IN COMPLEX WITH MN PEPTIDE                                                                            | IMMUNE SYSTEM                     |
| 2B0U | THE STRUCTURE OF THE FOLLISTATIN:ACTIVIN COMPLEX                                                                                                           | SIGNALING PROTEIN                 |
| 2B0Z | CRYSTAL STRUCTURE OF THE PROTEIN-PROTEIN COMPLEX BETWEEN F82I CYTOCHROME C AND CYTOCHROME C PEROXIDASE                                                     | OXIDOREDUCTASE/ELECTRON TRANSPORT |
| 2B10 | CRYSTAL STRUCTURE OF THE PROTEIN-PROTEIN COMPLEX BETWEEN F82S CYTOCHROME C AND CYTOCHROME C PEROXIDASE                                                     | OXIDOREDUCTASE/ELECTRON TRANSPORT |
| 2B11 | CRYSTAL STRUCTURE OF THE PROTEIN-PROTEIN COMPLEX BETWEEN F82W CYTOCHROME C AND CYTOCHROME C PEROXIDASE                                                     | OXIDOREDUCTASE/ELECTRON TRANSPORT |
| 2B12 | CRYSTAL STRUCTURE OF THE PROTEIN-PROTEIN COMPLEX BETWEEN F82Y CYTOCHROME C AND CYTOCHROME C PEROXIDASE                                                     | OXIDOREDUCTASE/ELECTRON TRANSPORT |
| 2B1A | CRYSTAL STRUCTURE ANALYSIS OF ANTI-HIV-1 V3 FAB 2219 IN COMPLEX WITH UG1033 PEPTIDE                                                                        | IMMUNE SYSTEM                     |
| 2B1H | CRYSTAL STRUCTURE ANALYSIS OF ANTI-HIV-1 V3 FAB 2219 IN COMPLEX WITH UG29 PEPTIDE                                                                          | IMMUNE SYSTEM                     |
| 2B1J | CRYSTAL STRUCTURE OF UNPHOSPHORYLATED CHEY BOUND TO THE N-TERMINUS OF FLIM                                                                                 | SIGNALING PROTEIN                 |
| 2B1N | CRYSTAL STRUCTURE OF A PAPAIN-FOLD PROTEIN WITHOUT THE CATALYTIC CYSTEINE FROM SEEDS OF PACHYRHIZUS EROSUS                                                 | SUGAR BINDING PROTEIN             |
| 2B1V | HUMAN ESTROGEN RECEPTOR ALPHA LIGAND-BINDING DOMAIN IN COMPLEX WITH OBCP-1M AND A GLUCOCORTICOID RECEPTOR INTERACTING PROTEIN 1 NR BOX II PEPTIDE          | HORMONE/GROWTH FACTOR RECEPTOR    |
| 2B1X | CRYSTAL STRUCTURE OF NAPHTHALENE 1,2-DIOXYGENASE FROM RHODOCOCCUS SP.                                                                                      | OXIDOREDUCTASE                    |
| 2B1Z | HUMAN ESTROGEN RECEPTOR ALPHA LIGAND-BINDING DOMAIN IN COMPLEX WITH 17METHYL-17ALPHA-DIHYDROEQUILENIN AND A GLUCOC INTERACTING PROTEIN 1 NR BOX II PEPTIDE | HORMONE/GROWTH FACTOR RECEPTOR    |
| 2B23 | HUMAN ESTROGEN RECEPTOR ALPHA LIGAND-BINDING DOMAIN AND A GLUCOCORTICOID RECEPTOR-INTERACTING PROTEIN 1 NR BOX II PEPTIDE                                  | HORMONE/GROWTH FACTOR RECEPTOR    |
| 2B24 | CRYSTAL STRUCTURE OF NAPHTHALENE 1,2-DIOXYGENASE FROM RHODOCOCCUS SP. BOUND TO INDOLE                                                                      | OXIDOREDUCTASE                    |
| 2B26 | THE CRYSTAL STRUCTURE OF THE PROTEIN COMPLEX OF YEAST HSP40 SIS1 AND HSP70 SSA1                                                                            | CHAPERONE/PROTEIN TRANSPORT       |
| 2B2T | ANDEM CHROMODOMAINS OF HUMAN CHD1 COMPLEXED WITH HISTONE H3 TAIL CONTAINING TRIMETHYLLYSINE 4 AND PHOSPHOTHREONINE 3                                       | PEPTIDE BINDING PROTEIN           |
| 2B2U | ANDEM CHROMODOMAINS OF HUMAN CHD1 COMPLEXED WITH HISTONE H3 TAIL CONTAINING TRIMETHYLLYSINE 4 AND DIMETHYLARGININE 2                                       | PEPTIDE BINDING PROTEIN           |
| 2B2V | CRYSTAL STRUCTURE ANALYSIS OF HUMAN CHD1 CHROMODOMAINS 1 AND 2 BOUND TO HISTONE H3 RESI 1-15 MEK4                                                          | PEPTIDE BINDING PROTEIN           |
| 2B2W | ANDEM CHROMODOMAINS OF HUMAN CHD1 COMPLEXED WITH HISTONE H3 TAIL CONTAINING TRIMETHYLLYSINE 4                                                              | PEPTIDE BINDING PROTEIN           |

|      |                                                                                                                                                                                                                                                                                                                                                                                |                               |
|------|--------------------------------------------------------------------------------------------------------------------------------------------------------------------------------------------------------------------------------------------------------------------------------------------------------------------------------------------------------------------------------|-------------------------------|
| 2B2X | VLA1 RDELTAH I-DOMAIN COMPLEXED WITH A QUADRUPLE MUTANT OF THE AQC2 FAB                                                                                                                                                                                                                                                                                                        | IMMUNE SYSTEM                 |
| 2B2Y | TANDEM CHROMODOMAINS OF HUMAN CHD1                                                                                                                                                                                                                                                                                                                                             | PEPTIDE BINDING PROTEIN       |
| 2B3G | P53N (FRAGMENT 33-60) BOUND TO RPA70N                                                                                                                                                                                                                                                                                                                                          | REPLICATION                   |
| 2B3T | MOLECULAR BASIS FOR BACTERIAL CLASS 1 RELEASE FACTOR METHYLATION BY PRMC                                                                                                                                                                                                                                                                                                       | TRANSLATION                   |
| 2B42 | CRYSTAL STRUCTURE OF THE TRITICUM XYLANSE INHIBITOR-I IN COMPLEX WITH BACILLUS SUBTILIS XYLANASE                                                                                                                                                                                                                                                                               | HYDROLASE INHIBITOR/HYDROLASE |
| 2B4C | CRYSTAL STRUCTURE OF HIV-1 JR-FL GP120 CORE PROTEIN CONTAINING THE THIRD VARIABLE REGION (V3) COMPLEXED WITH CD4 AND THE X5 ANTIBODY                                                                                                                                                                                                                                           | VIRAL PROTEIN/IMMUNE SYSTEM   |
| 2B4D | SSAT+COA+SP- SP DISORDERED                                                                                                                                                                                                                                                                                                                                                     | TRANSFERASE                   |
| 2B4J | STRUCTURAL BASIS FOR THE RECOGNITION BETWEEN HIV-1 INTEGRASE AND LEDGF/P75                                                                                                                                                                                                                                                                                                     | VIRAL PROTEIN, RECOMBINATION  |
| 2B4S | CRYSTAL STRUCTURE OF A COMPLEX BETWEEN PTP1B AND THE INSULIN RECEPTOR TYROSINE KINASE                                                                                                                                                                                                                                                                                          | HYDROLASE/TRANSFERASE         |
| 2B59 | THE TYPE II COHESIN DOCKERIN COMPLEX                                                                                                                                                                                                                                                                                                                                           | HYDROLASE/STRUCTURAL PROTEIN  |
| 2B5G | WILD TYPE SSAT- 1.7A STRUCTURE                                                                                                                                                                                                                                                                                                                                                 | TRANSFERASE                   |
| 2B5I | CYTOKINE RECEPTOR COMPLEX                                                                                                                                                                                                                                                                                                                                                      | CYTOKINE/CYTOKINE RECEPTOR    |
| 2B5J | CRYSTAL STRUCTURE OF HIV-1 REVERSE TRANSCRIPTASE (RT) IN COMPLEX WITH JANSSEN-R165481                                                                                                                                                                                                                                                                                          | TRANSFERASE                   |
| 2B5L | CRYSTAL STRUCTURE OF DDB1 IN COMPLEX WITH SIMIAN VIRUS 5 V PROTEIN                                                                                                                                                                                                                                                                                                             | PROTEIN BINDING/VIRAL PROTEIN |
| 2B5R | 1B LACTAMASE / B LACTAMASE INHIBITOR                                                                                                                                                                                                                                                                                                                                           | HYDROLASE/HYDROLASE INHIBITOR |
| 2B5T | 2.1 ANGSTROM STRUCTURE OF A NONPRODUCTIVE COMPLEX BETWEEN ANTITHROMBIN, SYNTHETIC HEPARIN MIMETIC SR123781 AND TWO S195A THROMBIN MOLECULES                                                                                                                                                                                                                                    | BLOOD CLOTTING                |
| 2B5U | CRYSTAL STRUCTURE OF COLICIN E3 V206C MUTANT IN COMPLEX WITH ITS IMMUNITY PROTEIN                                                                                                                                                                                                                                                                                              | RIBOSOME INHIBITOR, HYDROLASE |
| 2B63 | COMPLETE RNA POLYMERASE II-RNA INHIBITOR COMPLEX                                                                                                                                                                                                                                                                                                                               | TRANSFERASE/RNA               |
| 2B64 | 30S RIBOSOMAL SUBUNIT, TRNAS, MRNA AND RELEASE FACTOR RF1 FROM A CRYSTAL STRUCTURE OF THE WHOLE RIBOSOMAL COMPLEX. THIS FILE CONTAINS THE 30S SUBUNIT, TRNAS, MRNA AND RELEASE FACTOR RF1 FROM A CRYSTAL STRUCTURE OF THE WHOLE RIBOSOMAL COMPLEX". THE ENTIRE CRYSTAL STRUCTURE CONTAINS ONE 70S RIBOSOME, TRNAS, MRNA AND RELEASE FACTOR RF1 AND IS DESCRIBED IN REMARK 400. | RIBOSOME                      |
| 2B66 | 50S RIBOSOMAL SUBUNIT FROM A CRYSTAL STRUCTURE OF RELEASE FACTOR RF1, TRNAS AND MRNA BOUND TO THE RIBOSOME. THIS FILE CONTAINS THE 50S SUBUNIT FROM A CRYSTAL STRUCTURE OF RELEASE FACTOR RF1, TRNAS AND MRNA BOUND TO THE RIBOSOME AND IS DESCRIBED IN REMARK 400                                                                                                             | RIBOSOME                      |
| 2B6A | CRYSTAL STRUCTURE OF HIV-1 REVERSE TRANSCRIPTASE (RT) IN COMPLEX WITH THR-50                                                                                                                                                                                                                                                                                                   | TRANSFERASE                   |



|      |                                                                                                                                                                                                                                                                                                                                                                                          |                               |
|------|------------------------------------------------------------------------------------------------------------------------------------------------------------------------------------------------------------------------------------------------------------------------------------------------------------------------------------------------------------------------------------------|-------------------------------|
| 2B6N | THE 1.8 Å CRYSTAL STRUCTURE OF A PROTEINASE K LIKE ENZYME FROM A PSYCHROTROPH SERRATIA SPECIES                                                                                                                                                                                                                                                                                           | HYDROLASE                     |
| 2B76 | E. COLI QUINOL FUMARATE REDUCTASE FRDA E49Q MUTATION                                                                                                                                                                                                                                                                                                                                     | OXIDOREDUCTASE                |
| 2B7B | YEAST GUANINE NUCLEOTIDE EXCHANGE FACTOR EEF1BALPHA K205A MUTANT IN COMPLEX WITH EEF1A AND GDP                                                                                                                                                                                                                                                                                           | TRANSLATION                   |
| 2B7C | YEAST GUANINE NUCLEOTIDE EXCHANGE FACTOR EEF1BALPHA K205A MUTANT IN COMPLEX WITH EEF1A                                                                                                                                                                                                                                                                                                   | TRANSLATION                   |
| 2B7F | CRYSTAL STRUCTURE OF HUMAN T-CELL LEUKEMIA VIRUS PROTEASE, A NOVEL TARGET FOR ANTI-CANCER DESIGN                                                                                                                                                                                                                                                                                         | HYDROLASE                     |
| 2B7H | HEMOGLOBIN FROM CERDOCYON THOUS, A CANIDAE FROM BRAZIL, AT 2.2 ÅNGSTROMS RESOLUTION                                                                                                                                                                                                                                                                                                      | OXYGEN STORAGE/TRANSPORT      |
| 2B7Y | FAVA BEAN LECTIN-GLUCOSE COMPLEX                                                                                                                                                                                                                                                                                                                                                         | LECTIN                        |
| 2B8K | 12-SUBUNIT RNA POLYMERASE II                                                                                                                                                                                                                                                                                                                                                             | TRANSFERASE                   |
| 2B8O | CRYSTAL STRUCTURE OF GLU-GLY-ARG-CHLOROMETHYL KETONE-FACTOR VIIA/SOLUBLE TISSUE FACTOR COMPLEX                                                                                                                                                                                                                                                                                           | HYDROLASE/HYDROLASE INHIBITOR |
| 2B9H | CRYSTAL STRUCTURE OF FUS3 WITH A DOCKING MOTIF FROM STE7                                                                                                                                                                                                                                                                                                                                 | TRANSFERASE                   |
| 2B9I | CRYSTAL STRUCTURE OF FUS3 WITH A DOCKING MOTIF FROM MSG5                                                                                                                                                                                                                                                                                                                                 | TRANSFERASE                   |
| 2B9J | CRYSTAL STRUCTURE OF FUS3 WITH A DOCKING MOTIF FROM FAR1                                                                                                                                                                                                                                                                                                                                 | TRANSFERASE                   |
| 2B9M | 30S RIBOSOMAL SUBUNIT, TRNAS, MRNA AND RELEASE FACTOR RF2 FROM A CRYSTAL STRUCTURE OF THE WHOLE RIBOSOMAL COMPLEX. THIS FILE CONTAINS THE 30S RIBOSOMAL SUBUNIT, TRNAS, MRNA AND RELEASE FACTOR RF2 FROM A CRYSTAL STRUCTURE OF THE WHOLE RIBOSOMAL COMPLEX". THE ENTIRE CRYSTAL STRUCTURE CONTAINS ONE 70S RIBOSOME, TRNAS, MRNA AND RELEASE FACTOR RF2 AND IS DESCRIBED IN REMARK 400. | RIBOSOME                      |
| 2B9N | 50S RIBOSOMAL SUBUNIT FROM A CRYSTAL STRUCTURE OF RELEASE FACTOR RF2, TRNAS AND MRNA BOUND TO THE RIBOSOME. THIS FILE CONTAINS THE 50S SUBUNIT FROM A CRYSTAL STRUCTURE OF RELEASE FACTOR RF1, TRNAS AND MRNA BOUND TO THE RIBOSOME AND IS DESCRIBED IN REMARK 400.                                                                                                                      | RIBOSOME                      |
| 2B9O | 30S RIBOSOMAL SUBUNIT, TRNAS AND MRNA FROM A CRYSTAL STRUCTURE OF THE WHOLE RIBOSOMAL COMPLEX WITH A STOP CODON IN THE A-SITE. THIS FILE CONTAINS THE 30S SUBUNIT, TRNAS AND MRNA FROM A CRYSTAL STRUCTURE OF THE WHOLE RIBOSOMAL COMPLEX WITH A STOP CODON IN THE A-SITE AND IS DESCRIBED IN REMARK 400.                                                                                | RIBOSOME                      |
| 2B9P | 50S RIBOSOMAL SUBUNIT FROM A CRYSTAL STRUCTURE OF THE RIBOSOME IN COMPLEX WITH TRNAS AND MRNA WITH A STOP CODON IN THE A-SITE. THIS FILE CONTAINS THE 50S SUBUNIT FROM A CRYSTAL STRUCTURE OF THE RIBOSOME IN COMPLEX WITH TRNAS AND MRNA WITH A STOP CODON IN THE A-SITE AND IS DESCRIBED IN REMARK 400.                                                                                | RIBOSOME                      |
| 2B9S | CRYSTAL STRUCTURE OF HETERODIMERIC L. DONOVANI TOPOISOMERASE I-VANADATE-DNA COMPLEX                                                                                                                                                                                                                                                                                                      | ISOMERASE/DNA                 |
| 2BA0 | ARCHAEAL EXOSOME CORE                                                                                                                                                                                                                                                                                                                                                                    | RNA BINDING PROTEIN           |
| 2BA1 | ARCHAEAL EXOSOME CORE                                                                                                                                                                                                                                                                                                                                                                    | RNA BINDING PROTEIN           |

|      |                                                                                                                                                                              |                                         |
|------|------------------------------------------------------------------------------------------------------------------------------------------------------------------------------|-----------------------------------------|
| 2BAN | CRYSTAL STRUCTURE OF HIV-1 REVERSE TRANSCRIPTASE (RT) IN COMPLEX WITH JANSSEN-R157208                                                                                        | TRANSFERASE                             |
| 2BAP | CRYSTAL STRUCTURE OF THE N-TERMINAL MDIA1 ARMADILLO REPEAT REGION AND DIMERISATION DOMAIN IN COMPLEX WITH THE MDIA1 AUTOREGULATORY DOMAIN (DAD)                              | SIGNALING PROTEIN                       |
| 2BBA | CRYSTAL STRUCTURE AND THERMODYNAMIC CHARACTERIZATION OF THE EPHB4 RECEPTOR IN COMPLEX WITH AN EPHRIN-B2 ANTAGONIST PEPTIDE REVEALS THE DETERMINANTS FOR RECEPTOR SPECIFICITY | SIGNALING PROTEIN                       |
| 2BBM | SOLUTION STRUCTURE OF A CALMODULIN-TARGET PEPTIDE COMPLEX BY MULTIDIMENSIONAL NMR                                                                                            | CALCIUM-BINDING PROTEIN                 |
| 2BBV | THE REFINED THREE-DIMENSIONAL STRUCTURE OF AN INSECT VIRUS AT 2.8 ANGSTROMS RESOLUTION                                                                                       | VIRUS/RNA                               |
| 2BC4 | CRYSTAL STRUCTURE OF HLA-DM                                                                                                                                                  | IMMUNE SYSTEM                           |
| 2BCC | STIGMATELLIN-BOUND CYTOCHROME BC1 COMPLEX FROM CHICKEN                                                                                                                       | OXIDOREDUCTASE                          |
| 2BCG | STRUCTURE OF DOUBLY PRENYLATED YPT1:GDI COMPLEX                                                                                                                              | PROTEIN TRANSPORT                       |
| 2BCJ | CRYSTAL STRUCTURE OF G PROTEIN-COUPLED RECEPTOR KINASE 2 IN COMPLEX WITH GALPHA-Q AND GBETAGAMMA SUBUNITS                                                                    | TRANSFERASE/HYDROLASE                   |
| 2BCN | SOLVENT ISOTOPE EFFECTS ON INTERFACIAL PROTEIN ELECTRON TRANSFER BETWEEN CYTOCHROME C AND CYTOCHROME C PEROXIDASE                                                            | OXIDOREDUCTASE/ELECTRON TRANSFER        |
| 2BCX | CRYSTAL STRUCTURE OF CALMODULIN IN COMPLEX WITH A RYANODINE RECEPTOR PEPTIDE                                                                                                 | CALCIUM BINDING PROTEIN                 |
| 2BDN | CRYSTAL STRUCTURE OF HUMAN MCP-1 BOUND TO A BLOCKING ANTIBODY, 11K2                                                                                                          | IMMUNE SYSTEM                           |
| 2BE1 | STRUCTURE OF THE COMPACT LUMENAL DOMAIN OF YEAST IRE1                                                                                                                        | TRANSCRIPTION                           |
| 2BE2 | CRYSTAL STRUCTURE OF HIV-1 REVERSE TRANSCRIPTASE (RT) IN COMPLEX WITH R221239                                                                                                | TRANSFERASE                             |
| 2BE5 | CRYSTAL STRUCTURE OF THE T. THERMOPHILUS RNA POLYMERASE HOLOENZYME IN COMPLEX WITH INHIBITOR TAGETITOXIN                                                                     | TRANSFERASE                             |
| 2BE6 | 2.0 Å CRYSTAL STRUCTURE OF THE CAV1.2 IQ DOMAIN-CA/CAM COMPLEX                                                                                                               | MEMBRANE PROTEIN                        |
| 2BE7 | CRYSTAL STRUCTURE OF THE UNLIGANDED (T-STATE) ASPARTATE TRANSCARBAMOYLASE OF THE PSYCHROPHILIC BACTERIUM MORITELLA PROFUNDA                                                  | TRANSFERASE                             |
| 2BE9 | CRYSTAL STRUCTURE OF THE CTP-LIGANDED (T-STATE) ASPARTATE TRANSCARBAMOYLASE FROM THE EXTREMELY THERMOPHILIC ARCHAEON SULFOLOBUS ACIDOCALDARIUS                               | TRANSFERASE                             |
| 2BEC | CRYSTAL STRUCTURE OF CHP2 IN COMPLEX WITH ITS BINDING REGION IN NHE1 AND INSIGHTS INTO THE MECHANISM OF PH REGULATION                                                        | METAL BINDING PROTEIN/TRANSPORT PROTEIN |
| 2BED | STRUCTURE OF FPT BOUND TO INHIBITOR SCH207736                                                                                                                                | TRANSFERASE                             |
| 2BEQ | STRUCTURE OF A PROTEOLYTICALLY RESISTANT CORE FROM THE SEVERE ACUTE RESPIRATORY SYNDROME CORONAVIRUS S2 FUSION PROTEIN                                                       | VIRAL PROTEIN                           |
| 2BEU | REACTIVITY MODULATION OF HUMAN BRANCHED-CHAIN ALPHA-                                                                                                                         | OXIDOREDUCTASE                          |

| KETOACID DEHYDROGENASE BY AN INTERNAL MOLECULAR SWITCH |                                                                                                                                                                                     |                              |
|--------------------------------------------------------|-------------------------------------------------------------------------------------------------------------------------------------------------------------------------------------|------------------------------|
| 2BEV                                                   | REACTIVITY MODULATION OF HUMAN BRANCHED-CHAIN ALPHA-KETOACID DEHYDROGENASE BY AN INTERNAL MOLECULAR SWITCH                                                                          | OXIDOREDUCTASE               |
| 2BEW                                                   | REACTIVITY MODULATION OF HUMAN BRANCHED-CHAIN ALPHA-KETOACID DEHYDROGENASE BY AN INTERNAL MOLECULAR SWITCH                                                                          | OXIDOREDUCTASE               |
| 2BEX                                                   | CRYSTAL STRUCTURE OF PLACENTAL RIBONUCLEASE INHIBITOR IN COMPLEX WITH HUMAN EOSINOPHIL DERIVED NEUROTOXIN AT 2A RESOLUTION                                                          | COMPLEX (INHIBITOR/NUCLEASE) |
| 2BEZ                                                   | STRUCTURE OF A PROTEOLITICALLY RESISTANT CORE FROM THE SEVERE ACUTE RESPIRATORY SYNDROME CORONAVIRUS S2 FUSION PROTEIN                                                              | VIRAL PROTEIN                |
| 2BF3                                                   | CRYSTAL STRUCTURE OF A TOLUENE 4-MONOOXYGENASE CATALYTIC EFFECTOR PROTEIN VARIANT MISSING TEN N-TERMINAL RESIDUES (DELTA-N10 T4MOD)                                                 | OXIDOREDUCTASE               |
| 2BF8                                                   | CRYSTAL STRUCTURE OF SUMO MODIFIED UBIQUITIN CONJUGATING ENZYME E2-25K                                                                                                              | LIGASE/COMPLEX               |
| 2BFB                                                   | REACTIVITY MODULATION OF HUMAN BRANCHED-CHAIN ALPHA-KETOACID DEHYDROGENASE BY AN INTERNAL MOLECULAR SWITCH                                                                          | OXIDOREDUCTASE               |
| 2BFC                                                   | REACTIVITY MODULATION OF HUMAN BRANCHED-CHAIN ALPHA-KETOACID DEHYDROGENASE BY AN INTERNAL MOLECULAR SWITCH                                                                          | OXIDOREDUCTASE               |
| 2BFD                                                   | REACTIVITY MODULATION OF HUMAN BRANCHED-CHAIN ALPHA-KETOACID DEHYDROGENASE BY AN INTERNAL MOLECULAR SWITCH                                                                          | OXIDOREDUCTASE               |
| 2BFE                                                   | REACTIVITY MODULATION OF HUMAN BRANCHED-CHAIN ALPHA-KETOACID DEHYDROGENASE BY AN INTERNAL MOLECULAR SWITCH                                                                          | OXIDOREDUCTASE               |
| 2BFF                                                   | REACTIVITY MODULATION OF HUMAN BRANCHED-CHAIN ALPHA-KETOACID DEHYDROGENASE BY AN INTERNAL MOLECULAR SWITCH                                                                          | OXIDOREDUCTASE               |
| 2BFU                                                   | X-RAY STRUCTURE OF CPMV TOP COMPONENT                                                                                                                                               | VIRUS                        |
| 2BFX                                                   | MECHANISM OF AURORA-B ACTIVATION BY INCENP AND INHIBITION BY HESPERIDIN.                                                                                                            | TRANSFERASE COMPLEX          |
| 2BFZ                                                   | BACILLUS CEREUS METALLO-BETA-LACTAMASE (BCII) ARG (121) CYS MUTANT. SOLVED AT PH4.5 USING 20MM ZNSO4 IN BUFFER. 1MM DTT WAS USED AS A REDUCING AGENT. CYS221 IS OXIDIZED.           | HYDROLASE                    |
| 2BG8                                                   | BACILLUS CEREUS METALLO-BETA-LACTAMASE (BCII) ARG (121) CYS MUTANT. SOLVED AT PH4.5 USING 20 MICROMOLAR ZNSO4 IN THE BUFFER. 1MM DTT AND 1MM TCEP-HCL WERE USED AS REDUCING AGENTS. | HYDROLASE                    |
| 2BG9                                                   | REFINED STRUCTURE OF THE NICOTINIC ACETYLCHOLINE RECEPTOR AT 4A RESOLUTION.                                                                                                         | ION CHANNEL/RECEPTOR         |
| 2BGN                                                   | HIV-1 TAT PROTEIN DERIVED N-TERMINAL NONAPEPTIDE TRP2-TAT (1-9) BOUND TO THE ACTIVE SITE OF DIPEPTIDYL PEPTIDASE IV (CD26)                                                          | HYDROLASE/COMPLEX            |
| 2BGR                                                   | CRYSTAL STRUCTURE OF HIV-1 TAT DERIVED NONAPEPTIDES TAT(1-9) BOUND TO THE ACTIVE SITE OF DIPEPTIDYL PEPTIDASE IV (CD26)                                                             | HYDROLASE/COMPLEX            |
| 2BH1                                                   | X-RAY STRUCTURE OF THE GENERAL SECRETION PATHWAY COMPLEX OF THE N-TERMINAL DOMAIN OF EPSE AND THE CYTOSOLIC DOMAIN OF                                                               | TRANSPORT PROTEIN            |

## EPSL OF VIBRIO CHOLERAE

|      |                                                                                                          |                                      |
|------|----------------------------------------------------------------------------------------------------------|--------------------------------------|
| 2BIL | THE HUMAN PROTEIN KINASE PIM1 IN COMPLEX WITH ITS CONSENSUS PEPTIDE PIMTIDE                              | TRANSFERASE                          |
| 2BJ4 | ESTROGEN RECEPTOR ALPHA LBD IN COMPLEX WITH A PHAGE-DISPLAY DERIVED PEPTIDE ANTAGONIST                   | NUCLEAR RECEPTOR                     |
| 2BKH | MYOSIN VI NUCLEOTIDE-FREE (MDINSERT2) CRYSTAL STRUCTURE                                                  | COMPLEX (MOTOR PROTEIN/CALMODULIN)   |
| 2BK1 | MYOSIN VI NUCLEOTIDE-FREE (MDINSERT2-IQ) CRYSTAL STRUCTURE                                               | COMPLEX (MOTOR PROTEIN/CALMODULIN)   |
| 2BKK | CRYSTAL STRUCTURE OF AMINOGLYCOSIDE PHOSPHOTRANSFERASE APH (3')-IIIA IN COMPLEX WITH THE INHIBITOR AR_3A | TRANSFERASE/DESIGNED PROTEIN COMPLEX |
| 2BKR | NEDD8 NEDP1 COMPLEX                                                                                      | UBIQUITIN/HYDROLASE COMPLEX          |
| 2BKU | KAP95P:RANGTP COMPLEX                                                                                    | NUCLEAR TRANSPORT                    |
| 2BKY | CRYSTAL STRUCTURE OF THE ALBA1:ALBA2 HETERODIMER FROM SULFOLOBUS SOLFATARICUS                            | DNA BINDING PROTEIN                  |
| 2BKZ | STRUCTURE OF CDK2-CYCLIN A WITH PHA-404611                                                               | TRANSFERASE/COMPLEX                  |
| 2BL0 | PHYSARUM POLYCEPHALUM MYOSIN II REGULATORY DOMAIN                                                        | MUSCLE PROTEIN                       |
| 2BLD | THE QUASI-ATOMIC MODEL OF HUMAN ADENOVIRUS TYPE 5 CAPSID (PART 1)                                        | ADENOVIRUS                           |
| 2BLF | SULFITE DEHYDROGENASE FROM STARKEYA NOVELLA                                                              | OXIDOREDUCTASE                       |
| 2BMG | CRYSTAL STRUCTURE OF FACTOR XA IN COMPLEX WITH 50                                                        | HYDROLASE                            |
| 2BMK | FAB FRAGMENT OF PLP-DEPENDENT CATALYTIC ANTIBODY 15A9 IN COMPLEX WITH PHOSPHOPYRIDOXYL-D-ALANINE         | IMMUNE SYSTEM                        |
| 2BMO | THE CRYSTAL STRUCTURE OF NITROBENZENE DIOXYGENASE                                                        | OXIDOREDUCTASE                       |
| 2BMQ | THE CRYSTAL STRUCTURE OF NITROBENZENE DIOXYGENASE IN COMPLEX WITH NITROBENZENE                           | OXIDOREDUCTASE                       |
| 2BMR | THE CRYSTAL STRUCTURE OF NITROBENZENE DIOXYGENASE IN COMPLEX WITH 3-NITROTOLUENE                         | OXIDOREDUCTASE                       |
| 2BN1 | INSULIN AFTER A HIGH DOSE X-RAY BURN                                                                     | RADIATION DAMAGE                     |
| 2BN2 | CRYSTAL STRUCTURE OF BOVINE NEUROPHYSIN II COMPLEXED WITH THE VASOPRESSIN ANALOGUE PHE-TYR AMIDE         | COMPLEX (PROTEIN/PEPTIDE)            |
| 2BN3 | INSULIN BEFORE A HIGH DOSE X-RAY BURN                                                                    | RADIATION DAMAGE                     |
| 2BNP | LIPIDIC CUBIC PHASE GROWN REACTION CENTRE FROM RHODOBACTER SPHAEROIDES, GROUND STATE                     | REACTION CENTRE                      |
| 2BNQ | STRUCTURAL AND KINETIC BASIS FOR HEIGHTENED IMMUNOGENICITY OF T CELL VACCINES                            | IMMUNE SYSTEM/RECEPTOR/COMPLEX       |
| 2BNR | STRUCTURAL AND KINETIC BASIS FOR HEIGHTENED IMMUNOGENICITY OF T CELL VACCINES                            | IMMUNE SYSTEM/RECEPTOR/COMPLEX       |
| 2BNS | LIPIDIC CUBIC PHASE GROWN REACTION CENTRE FROM RHODOBACTER SPHAEROIDES, EXCITED STATE                    | REACTION CENTRE                      |
| 2BNU | STRUCTURAL AND KINETIC BASIS FOR HEIGHTENED IMMUNOGENICITY OF T CELL VACCINES                            | IMMUNE SYSTEM/RECEPTOR               |

|      |                                                                                                                                     |                                  |
|------|-------------------------------------------------------------------------------------------------------------------------------------|----------------------------------|
| 2BO9 | HUMAN CARBOXYPEPTIDASE A4 IN COMPLEX WITH HUMAN LATEXIN.                                                                            | HYDROLASE                        |
| 2BOB | POTASSIUM CHANNEL KCSA-FAB COMPLEX IN THALLIUM WITH TETRABUTYLAMMONIUM (TBA)                                                        | COMPLEX (ANTIBODY/ION CHANNEL)   |
| 2BOC | POTASSIUM CHANNEL KCSA-FAB COMPLEX IN THALLIUM WITH TETRAETHYLARSONIUM (TEAS)                                                       | COMPLEX (ANTIBODY/ION CHANNEL)   |
| 2BOV | MOLECULAR RECOGNITION OF AN ADP-RIBOSYLATING CLOSTRIDIUM BOTULINUM C3 EXOENZYME BY RALA GTPASE                                      | TRANSFERASE                      |
| 2BOZ | PHOTOSYNTHETIC REACTION CENTER MUTANT WITH GLY M203 REPLACED WITH LEU                                                               | REACTION CENTER                  |
| 2BP0 | M168L MUTANT OF NITRITE REDUCTASE FROM ALCALIGENES XYLOSOXIDANS                                                                     | OXIDOREDUCTASE                   |
| 2BP7 | NEW CRYSTAL FORM OF THE PSEUDOMONAS PUTIDA BRANCHED-CHAIN DEHYDROGENASE (E1)                                                        | OXIDOREDUCTASE                   |
| 2BP8 | M168Q STRUCTURE OF NITRITE REDUCTASE FROM ALCALIGENES XYLOSOXIDANS                                                                  | OXIDOREDUCTASE                   |
| 2BPB | SULFITE DEHYDROGENASE FROM STARKEYA NOVELLA                                                                                         | OXIDOREDUCTASE                   |
| 2BPM | STRUCTURE OF CDK2-CYCLIN A WITH PHA-630529                                                                                          | TRANSFERASE                      |
| 2BPT | STRUCTURE OF THE NUP1P:KAP95P COMPLEX                                                                                               | NUCLEAR TRANSPORT                |
| 2BQ1 | RIBONUCLEOTIDE REDUCTASE CLASS 1B HOLOCOMPLEX R1E,R2F FROM SALMONELLA TYPHIMURIUM                                                   | OXIDOREDUCTASE                   |
| 2BQ6 | CRYSTAL STRUCTURE OF FACTOR XA IN COMPLEX WITH 21                                                                                   | HYDROLASE                        |
| 2BQ7 | CRYSTAL STRUCTURE OF FACTOR XA IN COMPLEX WITH 43                                                                                   | HYDROLASE                        |
| 2BQW | CRYSTAL STRUCTURE OF FACTOR XA IN COMPLEX WITH COMPOUND 45                                                                          | HYDROLASE                        |
| 2BQZ | CRYSTAL STRUCTURE OF A TERNARY COMPLEX OF THE HUMAN HISTONE METHYLTRANSFERASE PR-SET7 (ALSO KNOWN AS SET8)                          | TRANSFERASE                      |
| 2BR2 | RNASE PH CORE OF THE ARCHAEAL EXOSOME                                                                                               | HYDROLASE                        |
| 2BR8 | CRYSTAL STRUCTURE OF ACETYLCHOLINE-BINDING PROTEIN (ACHBP) FROM APLYSIA CALIFORNICA IN COMPLEX WITH AN ALPHA-CONOTOXIN PNIA VARIANT | RECEPTOR/INHIBITOR COMPLEX       |
| 2BR9 | 14-3-3 PROTEIN EPSILON (HUMAN) COMPLEXED TO PEPTIDE                                                                                 | CELL REGULATOR PROTEIN           |
| 2BRR | COMPLEX OF THE NEISSERIAL PORA P1.4 EPI TOPE PEPTIDE AND TWO FAB-FRAGMENTS (ANTIBODY MN20B9.34)                                     | ANTIBODY/ANTIGEN COMPLEX         |
| 2BS3 | GLU C180-> GLN VARIANT QUINOL:FUMARATE REDUCTASE FROM WOLINELLA SUCCINOGENES                                                        | OXIDOREDUCTASE                   |
| 2BS4 | GLU C180-> ILE VARIANT QUINOL:FUMARATE REDUCTASE FROM WOLINELLA SUCCINOGENES                                                        | OXIDOREDUCTASE                   |
| 2BSK | CRYSTAL STRUCTURE OF THE TIM9 TIM10 HEXAMERIC COMPLEX                                                                               | PROTEIN TRANSPORT                |
| 2BSQ | FITAB BOUND TO DNA                                                                                                                  | TRANSCRIPTION REGULATION COMPLEX |
| 2BSR | CRYSTAL STRUCTURES AND KIR3DL1 RECOGNITION OF THREE IMMUNODOMINANT VIRAL PEPTIDES COMPLEXED TO HLA-B2705                            | COMPLEX (ANTIGEN/PEPTIDE)        |

|      |                                                                                                                                 |                                       |
|------|---------------------------------------------------------------------------------------------------------------------------------|---------------------------------------|
| 2BSS | CRYSTAL STRUCTURES AND KIR3DL1 RECOGNITION OF THREE IMMUNODOMINANT VIRAL PEPTIDES COMPLEXED TO HLA-B2705                        | COMPLEX (ANTIGEN/PEPTIDE)             |
| 2BST | CRYSTAL STRUCTURES AND KIR3DL1 RECOGNITION OF THREE IMMUNODOMINANT VIRAL PEPTIDES COMPLEXED TO HLA-B2705                        | COMPLEX (ANTIGEN/PEPTIDE)             |
| 2BTF | THE STRUCTURE OF CRYSTALLINE PROFILIN-BETA-ACTIN                                                                                | ACETYLATION AND ACTIN-BINDING         |
| 2BTO | STRUCTURE OF BTUBA FROM PROSTHECOBACTER DEJONGEII                                                                               | CYTOSKELETAL PROTEIN                  |
| 2BTP | 14-3-3 PROTEIN THETA (HUMAN) COMPLEXED TO PEPTIDE                                                                               | COMPLEX (SIGNAL TRANSDUCTION/PEPTIDE) |
| 2BTQ | STRUCTURE OF BTUBAB HETERODIMER FROM PROSTHECOBACTER DEJONGEII                                                                  | CYTOSKELETAL PROTEIN/COMPLEX          |
| 2BTV | ATOMIC MODEL FOR BLUETONGUE VIRUS (BTV) CORE                                                                                    | VIRUS                                 |
| 2BTW | CRYSTAL STRUCTURE OF ALR0975                                                                                                    | TRANSFERASE                           |
| 2BUM | CRYSTAL STRUCTURE OF WILD-TYPE PROTOCATECHUATE 3,4-DIOXYGENASE FROM ACINETOBACTER SP. ADP1                                      | OXIDOREDUCTASE                        |
| 2BUO | HIV-1 CAPSID C-TERMINAL DOMAIN IN COMPLEX WITH AN INHIBITOR OF PARTICLE ASSEMBLY                                                | VIRAL PROTEIN/PEPTIDE                 |
| 2BUQ | CRYSTAL STRUCTURE OF WILD-TYPE PROTOCATECHUATE 3,4-DIOXYGENASE FROM ACINETOBACTER SP. ADP1 IN COMPLEX WITH CATECHOL             | OXIDOREDUCTASE                        |
| 2BUR | CRYSTAL STRUCTURE OF WILD-TYPE PROTOCATECHUATE 3,4-DIOXYGENASE FROM ACINETOBACTER SP. ADP1 IN COMPLEX WITH 4-HYDROXYBENZOATE    | OXIDOREDUCTASE                        |
| 2BUT | CRYSTAL STRUCTURE OF PROTOCATECHUATE 3,4-DIOXYGENASE FROM ACINETOBACTER SP. ADP1 MUTANT R457S- APO                              | OXIDOREDUCTASE                        |
| 2BUU | CRYSTAL STRUCTURE OF PROTOCATECHUATE 3,4-DIOXYGENASE FROM ACINETOBACTER SP. ADP1 MUTANT R457S IN COMPLEX WITH 4-NITROCATÉCHOL   | OXIDOREDUCTASE                        |
| 2BUV | CRYSTAL STRUCTURE OF PROTOCATECHUATE 3,4-DIOXYGENASE FROM ACINETOBACTER SP. ADP1 MUTANT R457S IN COMPLEX WITH PROTOCATECHUATE   | OXIDOREDUCTASE                        |
| 2BUW | CRYSTAL STRUCTURE OF PROTOCATECHUATE 3,4-DIOXYGENASE FROM ACINETOBACTER SP. ADP1 MUTANT R457S IN COMPLEX WITH 4-HYDROXYBENZOATE | OXIDOREDUCTASE                        |
| 2BUX | CRYSTAL STRUCTURE OF PROTOCATECHUATE 3,4-DIOXYGENASE FROM ACINETOBACTER SP. ADP1 MUTANT R133H                                   | OXIDOREDUCTASE                        |
| 2BUY | CRYSTAL STRUCTURE OF PROTOCATECHUATE 3,4-DIOXYGENASE FROM ACINETOBACTER SP. ADP1 MUTANT R133H IN COMPLEX WITH CATECHOL          | OXIDOREDUCTASE                        |
| 2BUZ | CRYSTAL STRUCTURE OF PROTOCATECHUATE 3,4-DIOXYGENASE FROM ACINETOBACTER SP. ADP1 MUTANT R133H IN COMPLEX WITH 4-NITROCATÉCHOL   | OXIDOREDUCTASE                        |
| 2BV0 | CRYSTAL STRUCTURE OF PROTOCATECHUATE 3,4-DIOXYGENASE FROM ACINETOBACTER SP. ADP1 MUTANT R133H IN COMPLEX WITH PROTOCATECHUATE.  | OXIDOREDUCTASE                        |
| 2BV8 | THE CRYSTAL STRUCTURE OF PHYCOCYANIN FROM GRACILARIA                                                                            | PHOTOSYNTHESIS                        |

## CHILENSIS.

|      |                                                                                                                                                |                                    |
|------|------------------------------------------------------------------------------------------------------------------------------------------------|------------------------------------|
| 2BVO | STRUCTURES OF THREE HIV-1 HLA-B5703-PEPTIDE COMPLEXES AND IDENTIFICATION OF RELATED HLAS POTENTIALLY ASSOCIATED WITH LONG-TERM NON-PROGRESSION | GLYCOPROTEIN/PEPTIDE COMPLEX       |
| 2BVP | STRUCTURES OF THREE HIV-1 HLA-B5703-PEPTIDE COMPLEXES AND IDENTIFICATION OF RELATED HLAS POTENTIALLY ASSOCIATED WITH LONG-TERM NON-PROGRESSION | GLYCOPROTEIN/PEPTIDE COMPLEX       |
| 2BW3 | THREE-DIMENSIONAL STRUCTURE OF THE HERMES DNA TRANSPOSASE                                                                                      | DNA RECOMBINATION                  |
| 2BWE | THE CRYSTAL STRUCTURE OF THE COMPLEX BETWEEN THE UBA AND UBL DOMAINS OF DSK2                                                                   | SIGNALING PROTEIN                  |
| 2BWO | 5-AMINOLEVULINATE SYNTHASE FROM RHODOBACTER CAPSULATUS IN COMPLEX WITH SUCCINYL-COA                                                            | TRANSFERASE                        |
| 2BYK | HISTONE FOLD HETERODIMER OF THE CHROMATIN ACCESSIBILITY COMPLEX                                                                                | DNA-BINDING PROTEIN                |
| 2BYM | HISTONE FOLD HETERODIMER OF THE CHROMATIN ACCESSIBILITY COMPLEX                                                                                | DNA-BINDING PROTEIN                |
| 2BYP | CRYSTAL STRUCTURE OF APLYSIA CALIFORNICA ACHBP IN COMPLEX WITH ALPHA-CONOTOXIN IMI                                                             | RECEPTOR COMPLEX                   |
| 2BZ6 | ORALLY AVAILABLE FACTOR7A INHIBITOR                                                                                                            | HYDROLASE                          |
| 2BZK | CRYSTAL STRUCTURE OF THE HUMAN PIM1 IN COMPLEX WITH AMPPNP AND PIMTIDE                                                                         | COMPLEX TRANSFERASE/PEPTIDE        |
| 2BZW | THE CRYSTAL STRUCTURE OF BCL-XL IN COMPLEX WITH FULL-LENGTH BAD                                                                                | TRANSCRIPTION COMPLEX              |
| 2C0L | TPR DOMAIN OF HUMAN PEX5P IN COMPLEX WITH HUMAN MSCP2                                                                                          | TRANSPORT PROTEIN/RECEPTOR COMPLEX |
| 2C1D | CRYSTAL STRUCTURE OF SOXXA FROM P. PANTOTROPHUS                                                                                                | OXIDOREDUCTASE                     |
| 2C1E | CRYSTAL STRUCTURES OF CASPASE-3 IN COMPLEX WITH AZA-PEPTIDE MICHAEL ACCEPTOR INHIBITORS.                                                       | HYDROLASE                          |
| 2C1J | MOLECULAR BASIS FOR THE RECOGNITION OF PHOSPHORYLATED AND PHOSPHOACETYLATED HISTONE H3 BY 14-3-3                                               | SIGNALING PROTEIN/COMPLEX          |
| 2C1M | NUP50:IMPORTIN-ALPHA COMPLEX                                                                                                                   | NUCLEAR TRANSPORT/COMPLEX          |
| 2C1N | MOLECULAR BASIS FOR THE RECOGNITION OF PHOSPHORYLATED AND PHOSPHOACETYLATED HISTONE H3 BY 14-3-3                                               | SIGNALING PROTEIN/COMPLEX          |
| 2C1O | ENAIHHIS FAB FRAGMENT IN THE FREE FORM                                                                                                         | IMMUNE SYSTEM                      |
| 2C1P | FAB-FRAGMENT OF ENANTIOSELECTIVE ANTIBODY COMPLEXED WITH FINROZOLE                                                                             | IMMUNE SYSTEM                      |
| 2C1T | STRUCTURE OF THE KAP60P:NUP2 COMPLEX                                                                                                           | NUCLEAR TRANSPORT/COMPLEX          |
| 2C23 | 14-3-3 PROTEIN BETA (HUMAN) IN COMPLEX WITH EXOENZYME S PEPTIDE                                                                                | SIGNALING PROTEIN/COMPLEX          |
| 2C2K | CRYSTAL STRUCTURES OF CASPASE-3 IN COMPLEX WITH AZA-PEPTIDE MICHAEL ACCEPTOR INHIBITORS.                                                       | HYDROLASE                          |
| 2C2L | CRYSTAL STRUCTURE OF THE CHIP U-BOX E3 UBIQUITIN LIGASE                                                                                        | HEAT-SHOCK PROTEIN COMPLEX         |

|      |                                                                                                       |                                   |
|------|-------------------------------------------------------------------------------------------------------|-----------------------------------|
| 2C2M | CRYSTAL STRUCTURES OF CASPASE-3 IN COMPLEX WITH AZA-PEPTIDE MICHAEL ACCEPTOR INHIBITORS.              | HYDROLASE                         |
| 2C2O | CRYSTAL STRUCTURES OF CASPASE-3 IN COMPLEX WITH AZA-PEPTIDE MICHAEL ACCEPTOR INHIBITORS.              | HYDROLASE                         |
| 2C2Z | CRYSTAL STRUCTURE OF CASPASE-8 IN COMPLEX WITH AZA-PEPTIDE MICHAEL ACCEPTOR INHIBITOR                 | HYDROLASE                         |
| 2C35 | SUBUNITS RPB4 AND RPB7 OF HUMAN RNA POLYMERASE II                                                     | POLYMERASE                        |
| 2C37 | RNASE PH CORE OF THE ARCHAEAL EXOSOME IN COMPLEX WITH U8 RNA                                          | HYDROLASE                         |
| 2C38 | RNASE PH CORE OF THE ARCHAEAL EXOSOME IN COMPLEX WITH A5 RNA                                          | HYDROLASE                         |
| 2C3I | CRYSTAL STRUCTURE OF HUMAN PIM1 IN COMPLEX WITH IMIDAZOPYRIDAZIN I                                    | COMPLEX TRANSFERASE/PEPTIDE       |
| 2C4F | CRYSTAL STRUCTURE OF FACTOR VII.STF COMPLEXED WITH PD0297121                                          | HYDROLASE                         |
| 2C4G | STRUCTURE OF CDK2-CYCLIN A WITH PHA-533514                                                            | TRANSFERASE                       |
| 2C4O | CRYSTAL STRUCTURE OF HUMAN UBIQUITIN-CONJUGATING ENZYME UBCH5B                                        | LIGASE                            |
| 2C5I | N-TERMINAL DOMAIN OF TLG1 COMPLEXED WITH N-TERMINUS OF VPS51 IN DISTORTED CONFORMATION                | PROTEIN TRANSPORT/COMPLEX         |
| 2C5K | N-TERMINAL DOMAIN OF TLG1 COMPLEXED WITH N-TERMINUS OF VPS51                                          | PROTEIN TRANSPORT/COMPLEX         |
| 2C5L | STRUCTURE OF PLC EPSILON RAS ASSOCIATION DOMAIN WITH HRAS                                             | SIGNALING PROTEIN/COMPLEX         |
| 2C5N | DIFFERENTIAL BINDING OF INHIBITORS TO ACTIVE AND INACTIVE CDK2 PROVIDES INSIGHTS FOR DRUG DESIGN      | TRANSFERASE                       |
| 2C5P | DIFFERENTIAL BINDING OF INHIBITORS TO ACTIVE AND INACTIVE CDK2 PROVIDES INSIGHTS FOR DRUG DESIGN      | TRANSFERASE                       |
| 2C5V | DIFFERENTIAL BINDING OF INHIBITORS TO ACTIVE AND INACTIVE CDK2 PROVIDES INSIGHTS FOR DRUG DESIGN      | COMPLEX (TRANSFERASE/CYCLIN)      |
| 2C5W | PENICILLIN-BINDING PROTEIN 1A (PBP-1A) ACYL-ENZYME COMPLEX (CEFOTAXIME) FROM STREPTOCOCCUS PNEUMONIAE | PEPTIDOGLYCAN SYNTHESIS           |
| 2C5X | DIFFERENTIAL BINDING OF INHIBITORS TO ACTIVE AND INACTIVE CDK2 PROVIDES INSIGHTS FOR DRUG DESIGN      | COMPLEX (TRANSFERASE/INHIBITOR)   |
| 2C63 | 14-3-3 PROTEIN ETA (HUMAN) COMPLEXED TO PEPTIDE                                                       | SIGNALING PROTEIN/PEPTIDE COMPLEX |
| 2C6T | CRYSTAL STRUCTURE OF THE HUMAN CDK2 COMPLEXED WITH THE TRIAZOLOPYRIMIDINE INHIBITOR                   | COMPLEX (TRANSFERASE/CYCLIN2)     |
| 2C6W | PENICILLIN-BINDING PROTEIN 1A (PBP-1A) FROM STREPTOCOCCUS PNEUMONIAE                                  | PEPTIDOGLYCAN SYNTHESIS           |
| 2C74 | 14-3-3 PROTEIN ETA (HUMAN) COMPLEXED TO PEPTIDE                                                       | SIGNALING PROTEIN/PEPTIDE COMPLEX |
| 2C7J | PHYCOERYTHROCYANIN FROM MASTIGOCLADUS LAMINOSUS, 295 K, 3.0 A                                         | ELECTRON TRANSPORT                |
| 2C7K | LAUE STRUCTURE OF PHYCOERYTHROCYANIN FROM MASTIGOCLADUS LAMINOSUS                                     | ELECTRON TRANSPORT                |
| 2C7L | LOW TEMPERATURE STRUCTURE OF PHYCOERYTHROCYANIN FROM MASTIGOCLADUS LAMINOSUS                          | ELECTRON TRANSPORT                |



|      |                                                                                                                                       |                                     |
|------|---------------------------------------------------------------------------------------------------------------------------------------|-------------------------------------|
| 2C7M | HUMAN RABEX-5 RESIDUES 1-74 IN COMPLEX WITH UBIQUITIN                                                                                 | UBIQUITIN COMPLEX                   |
| 2C7N | HUMAN RABEX-5 RESIDUES 1-74 IN COMPLEX WITH UBIQUITIN                                                                                 | UBIQUITIN COMPLEX                   |
| 2C7U | CONFLICTING SELECTIVE FORCES AFFECT CD8 T-CELL RECEPTOR CONTACT SITES IN AN HLA-A2 IMMUNODOMINANT HIV EPITOPE.                        | GLYCOPROTEIN/PEPTIDE COMPLEX        |
| 2C8Q | INSULINE(1SEC) AND UV LASER EXCITED FLUORESCENCE                                                                                      | HORMONE                             |
| 2C8R | INSULINE(60SEC) AND UV LASER EXCITED FLUORESCENCE                                                                                     | HORMONE                             |
| 2C8W | THROMBIN INHIBITORS                                                                                                                   | HYDROLASE                           |
| 2C8X | THROMBIN INHIBITORS                                                                                                                   | HYDROLASE                           |
| 2C8Y | THROMBIN INHIBITORS                                                                                                                   | HYDROLASE                           |
| 2C8Z | THROMBIN INHIBITORS                                                                                                                   | HYDROLASE                           |
| 2C90 | THROMBIN INHIBITORS                                                                                                                   | HYDROLASE                           |
| 2C93 | THROMBIN INHIBITORS                                                                                                                   | HYDROLASE                           |
| 2C9F | THE QUASI-ATOMIC MODEL OF THE ADENOVIRUS TYPE 3 PENTON DODECAHEDRON                                                                   | VIRUS LIKE PARTICLE                 |
| 2C9T | CRYSTAL STRUCTURE OF ACETYLCHOLINE BINDING PROTEIN (ACHBP) FROM APLYSIA CALIFORNICA IN COMPLEX WITH ALPHA-CONOTOXIN IMI               | RECEPTOR/TOXIN COMPLEX              |
| 2C9W | CRYSTAL STRUCTURE OF SOCS-2 IN COMPLEX WITH ELONGIN-B AND ELONGIN-C AT 1.9A RESOLUTION                                                | TRANSCRIPTION REGULATION            |
| 2C9X | SULFITE DEHYDROGENASE FROM STARKEYA NOVELLA Y236F MUTANT                                                                              | OXIDOREDUCTASE                      |
| 2CA3 | SULFITE DEHYDROGENASE FROM STARKEYA NOVELLA R55M MUTANT                                                                               | OXIDOREDUCTASE                      |
| 2CA4 | SULFITE DEHYDROGENASE FROM STARKEYA NOVELLA MUTANT                                                                                    | OXIDOREDUCTASE                      |
| 2CAZ | ESCRT-I CORE                                                                                                                          | PROTEIN TRANSPORT                   |
| 2CBL | N-TERMINAL DOMAIN OF CBL IN COMPLEX WITH ITS BINDING SITE ON ZAP-70                                                                   | COMPLEX (PROTO-ONCOGENE/PEPTIDE)    |
| 2CCH | THE CRYSTAL STRUCTURE OF CDK2 CYCLIN A IN COMPLEX WITH A SUBSTRATE PEPTIDE DERIVED FROM CDC MODIFIED WITH A GAMMA-LINKED ATP ANALOGUE | COMPLEX(TRANSFERASE/CELL DIVISION)  |
| 2CCI | CRYSTAL STRUCTURE OF PHOSPHO-CDK2 CYCLIN A IN COMPLEX WITH A PEPTIDE CONTAINING BOTH THE SUBSTRATE AND RECRUITMENT SITES OF CDC6      | COMPLEX (TRANSFERASE/CELL DIVISION) |
| 2CDE | STRUCTURE AND BINDING KINETICS OF THREE DIFFERENT HUMAN CD1D-ALPHA-GALACTOSYLCERAMIDE SPECIFIC T CELL RECEPTORS-INKT-TCR              | CELL RECEPTOR                       |
| 2CDF | STRUCTURE AND BINDING KINETICS OF THREE DIFFERENT HUMAN CD1D-ALPHA-GALACTOSYLCERAMIDE-SPECIFIC T CELL RECEPTORS (TCR 5E)              | CELL RECEPTOR                       |
| 2CDG | STRUCTURE AND BINDING KINETICS OF THREE DIFFERENT HUMAN CD1D-ALPHA-GALACTOSYLCERAMIDE-SPECIFIC T CELL RECEPTORS (TCR 5B)              | CELL RECEPTOR                       |

|      |                                                                                                                                                    |                                     |
|------|----------------------------------------------------------------------------------------------------------------------------------------------------|-------------------------------------|
| 2CDR | CRYSTAL STRUCTURES OF CASPASE-3 IN COMPLEX WITH AZA-PEPTIDE EPOXIDE INHIBITORS.                                                                    | HYDROLASE/INHIBITOR COMPLEX         |
| 2CE8 | AN EH1 PEPTIDE BOUND TO THE GROUCHO-TLE WD40 DOMAIN.                                                                                               | TRANSCRIPTION REGULATION            |
| 2CEU | DESPENTAPEPTIDE INSULIN IN ACETIC ACID (PH 2)                                                                                                      | HORMONE                             |
| 2CF8 | THROMBIN-METHOXY                                                                                                                                   | COMPLEX HYDROLASE/INHIBITOR         |
| 2CF9 | THROMBIN-METHOXY2                                                                                                                                  | COMPLEX HYDROLASE/INHIBITOR         |
| 2CFA | STRUCTURE OF VIRAL FLAVIN-DEPENDANT THYMIDYLATE SYNTHASE THYX                                                                                      | TRANSFERASE                         |
| 2CG5 | STRUCTURE OF AMINOADIPATE-SEMIALDEHYDE DEHYDROGENASE-PHOSPHOPANTETHEINYL TRANSFERASE IN COMPLEX WITH CYTOSOLIC ACYL CARRIER PROTEIN AND COENZYME A | TRANSFERASE/HYDROLASE (COMPLEX)     |
| 2CG9 | CRYSTAL STRUCTURE OF AN HSP90-SBA1 CLOSED CHAPERONE COMPLEX                                                                                        | CHAPERONE COMPLEX                   |
| 2CGR | LOCAL AND TRANSMITTED CONFORMATIONAL CHANGES ON COMPLEXATION OF AN ANTI-SWEETENER FAB                                                              | IMMUNOGLOBULIN                      |
| 2CGT | GROEL-ADP-GP31 COMPLEX                                                                                                                             | CHAPERONE                           |
| 2CH4 | COMPLEX BETWEEN BACTERIAL CHEMOTAXIS HISTIDINE KINASE CHEA DOMAINS P4 AND P5 AND RECEPTOR-ADAPTOR PROTEIN CHEW                                     | TRANSFERASE/CHEMOTAXIS              |
| 2CHA | THE STRUCTURE OF CRYSTALLINE ALPHA-CHYMOTRYPSIN, S.V.THE ATOMIC STRUCTURE OF TOSYL-ALPHA-CHYMOTRYPSIN AT 2 ANGSTROMS RESOLUTION                    | HYDROLASE (SERINE PROTEINASE)       |
| 2CHN | BACTEROIDES THETA10TAOMICRON HEXOSAMINIDASE WITH O-GLCNACASE ACTIVITY- NAG-THIAZOLINE COMPLEX                                                      | HYDROLASE                           |
| 2CHO | BACTEROIDES THETA10TAOMICRON HEXOSAMINIDASE WITH O-GLCNACASE ACTIVITY                                                                              | HYDROLASE                           |
| 2CI9 | NCK1 SH2-DOMAIN IN COMPLEX WITH A DODECAPHOSPHOPEPTIDE FROM EPEC PROTEIN TIR                                                                       | SH2-DOMAIN/COMPLEX                  |
| 2CII | THE CRYSTAL STRUCTURE OF H-2DB COMPLEXED WITH A PARTIAL PEPTIDE EPITOPE SUGGESTS AN MHC CLASS I ASSEMBLY-INTERMEDIATE                              | COMPLEX (ANTIGEN/PEPTIDE)           |
| 2CIK | INSIGHTS INTO CROSSREACTIVITY IN HUMAN ALLORECOGNITION: THE STRUCTURE OF HLA-B35011 PRESENTING AN EPITOPE DERIVED FROM CYTOCHROME P450.            | ANTIGEN/PEPTIDE COMPLEX             |
| 2CJI | CRYSTAL STRUCTURE OF A HUMAN FACTOR XA INHIBITOR COMPLEX                                                                                           | HYDROLASE                           |
| 2CJM | MECHANISM OF CDK INHIBITION BY ACTIVE SITE PHOSPHORYLATION: CDK2 Y15P T160P IN COMPLEX WITH CYCLIN A STRUCTURE                                     | COMPLEX (TRANSFERASE/CELL DIVISION) |
| 2CJS | STRUCTURAL BASIS FOR A MUNC13-1 HOMODIMER- MUNC13-1- RIM HETERODIMER SWITCH: C2-DOMAINS AS VERSATILE PROTEIN-PROTEIN INTERACTION MODULES           | EXOCYTOSIS                          |
| 2CJW | CRYSTAL STRUCTURE OF THE SMALL GTPASE GEM (GEMDNDCAM) IN COMPLEX TO MG.GDP                                                                         | G-PROTEIN                           |
| 2CJX | EXTENDED SUBSTRATE RECOGNITION IN CASPASE-3 REVEALED BY HIGH RESOLUTION X-RAY STRUCTURE ANALYSIS                                                   | COMPLEX (HYDROLASE-INHIBITOR)       |
| 2CJY | EXTENDED SUBSTRATE RECOGNITION IN CASPASE-3 REVEALED BY                                                                                            | COMPLEX (HYDROLASE-INHIBITOR)       |

## HIGH RESOLUTION X-RAY STRUCTURE ANALYSIS

|      |                                                                                                                                                      |                                  |
|------|------------------------------------------------------------------------------------------------------------------------------------------------------|----------------------------------|
| 2CK0 | ANTI-ANTI-IDIOTYPIC ANTIBODY AGAINST HUMAN ANGIOTENSIN II, COMPLEX WITH A SYNTHETIC CYCLIC PEPTIDE                                                   | IMMUNOGLOBULIN                   |
| 2CK3 | AZIDE INHIBITED BOVINE F1-ATPASE                                                                                                                     | HYDROLASE                        |
| 2CKB | STRUCTURE OF THE 2C/KB/DEV8 COMPLEX                                                                                                                  | MAJOR HISTOCOMPATIBILITY COMPLEX |
| 2CKF | CRYSTAL STRUCTURE OF THE TERMINAL COMPONENT OF THE PAH-HYDROXYLATING DIOXYGENASE FROM SPHINGOMONAS SP CHY-1                                          | OXIDOREDUCTASE                   |
| 2CKH | SENPI-SUMO2 COMPLEX                                                                                                                                  | HYDROLASE                        |
| 2CKL | RING1B-BMI1 E3 CATALYTIC DOMAIN STRUCTURE                                                                                                            | TRANSCRIPTION REGULATION COMPLEX |
| 2CLK | TRYPTOPHAN SYNTHASE IN COMPLEX WITH D-GLYCERALDEHYDE 3-PHOSPHATE (G3P)                                                                               | LYASE                            |
| 2CLR | THREE DIMENSIONAL STRUCTURE OF A PEPTIDE EXTENDING OUT ONE END OF A CLASS I MHC BINDING SITE                                                         | HISTOCOMPATIBILITY ANTIGEN       |
| 2CLV | MHC CLASS I NATURAL MUTANT H-2KBM8 HEAVY CHAIN COMPLEXED WITH BETA-2 MICROGLOBULIN AND PBM8 PEPTIDE                                                  | IMMUNE SYSTEM                    |
| 2CLW | CRYSTAL STRUCTURE OF HUMAN UBIQUITIN-CONJUGATING ENZYME UBCH5B                                                                                       | LIGASE                           |
| 2CLY | SUBCOMPLEX OF THE STATOR OF BOVINE MITOCHONDRIAL ATP SYNTHASE                                                                                        | HYDROLASE                        |
| 2CLZ | MHC CLASS I NATURAL MUTANT H-2KBM8 HEAVY CHAIN COMPLEXED WITH BETA-2 MICROGLOBULIN AND PBM1 PEPTIDE                                                  | IMMUNE SYSTEM                    |
| 2CMR | CRYSTAL STRUCTURE OF THE HIV-1 NEUTRALIZING ANTIBODY D5 FAB BOUND TO THE GP41 INNER-CORE MIMETIC 5-HELIX                                             | IMMUNOGLOBULIN COMPLEX           |
| 2CMY | CRYSTAL COMPLEX BETWEEN BOVINE TRYPSIN AND VERONICA HEDERIFOLIA TRYPSIN INHIBITOR                                                                    | HYDROLASE                        |
| 2CN0 | COMPLEX OF RECOMBINANT HUMAN THROMBIN WITH A DESIGNED INHIBITOR                                                                                      | HYDROLASE                        |
| 2CNK | CRYSTAL STRUCTURES OF CASPASE-3 IN COMPLEX WITH AZA-PEPTIDE EPOXIDE INHIBITORS.                                                                      | HYDROLASE                        |
| 2CNL | CRYSTAL STRUCTURES OF CASPASE-3 IN COMPLEX WITH AZA-PEPTIDE EPOXIDE INHIBITORS.                                                                      | HYDROLASE                        |
| 2CNM | RIMI - RIBOSOMAL S18 N-ALPHA-PROTEIN ACETYLTRANSFERASE IN COMPLEX WITH A BISUBSTRATE INHIBITOR (CTERM-ARG-ARG-PHE-TYR-ARG-ALA-N-ALPHA-ACETYL-S-COA). | TRANSFERASE                      |
| 2CNN | CRYSTAL STRUCTURES OF CASPASE-3 IN COMPLEX WITH AZA-PEPTIDE EPOXIDE INHIBITORS.                                                                      | HYDROLASE                        |
| 2CNO | CRYSTAL STRUCTURES OF CASPASE-3 IN COMPLEX WITH AZA-PEPTIDE EPOXIDE INHIBITORS.                                                                      | HYDROLASE                        |
| 2CNW | GDPALF4 COMPLEX OF THE SRP GTPASES FFH AND FTSY                                                                                                      | SIGNAL RECOGNITION               |
| 2COL | CRYSTAL STRUCTURE ANALYSIS OF CYAA/C-CAM WITH PYROPHOSPHATE                                                                                          | LYASE/METAL BINDING PROTEIN      |
| 2CPK | CRYSTAL STRUCTURE OF THE CATALYTIC SUBUNIT OF CYCLIC ADENOSINE MONOPHOSPHATE-DEPENDENT PROTEIN KINASE                                                | TRANSFERASE(PHOSPHOTRANSFERASE)  |

|      |                                                                                                                                                 |                               |
|------|-------------------------------------------------------------------------------------------------------------------------------------------------|-------------------------------|
| 2CV5 | CRYSTAL STRUCTURE OF HUMAN NUCLEOSOME CORE PARTICLE                                                                                             | STRUCTURAL PROTEIN/DNA        |
| 2CVY | STRUCTURES OF YEAST RIBONUCLEOTIDE REDUCTASE I                                                                                                  | OXIDOREDUCTASE                |
| 2CW0 | CRYSTAL STRUCTURE OF THERMUS THERMOPHILUS RNA POLYMERASE HOLOENZYME AT 3.3 ANGSTROMS RESOLUTION                                                 | TRANSFERASE                   |
| 2CWG | CRYSTALLOGRAPHIC REFINEMENT AND STRUCTURE ANALYSIS OF THE COMPLEX OF WHEAT GERM AGGLUTININ WITH A BIVALENT SIALOGLYCOPEPTIDE FROM GLYCOPHORIN A | LECTIN(AGGLUTININ)            |
| 2CZ3 | PHOTO-ACTIVATION STATE OF FE-TYPE NHASE IN ANAEROBIC CONDITION                                                                                  | LYASE                         |
| 2CZ0 | PHOTO-ACTIVATION STATE OF FE-TYPE NHASE IN AEROBIC CONDITION                                                                                    | LYASE                         |
| 2CZ1 | PHOTO-ACTIVATION STATE OF FE-TYPE NHASE WITH N-BA IN ANAEROBIC CONDITION                                                                        | LYASE                         |
| 2CZ6 | COMPLEX OF INACTIVE FE-TYPE NHASE WITH CYCLOHEXYL ISOCYANIDE                                                                                    | LYASE                         |
| 2CZ7 | FE-TYPE NHASE PHOTO-ACTIVATED FOR 75MIN AT 105K                                                                                                 | LYASE                         |
| 2CZV | CRYSTAL STRUCTURE OF ARCHEAL RNASE P PROTEIN PH1481P IN COMPLEX WITH PH1877P                                                                    | HYDROLASE                     |
| 2D03 | CRYSTAL STRUCTURE OF THE G91S MUTANT OF THE NNA7 FAB                                                                                            | IMMUNE SYSTEM                 |
| 2D07 | CRYSTAL STRUCTURE OF SUMO-3-MODIFIED THYMINE-DNA GLYCOSYLASE                                                                                    | HYDROLASE                     |
| 2D00 | STRCUTURE OF DIOL DEHYDRATASE-REACTIVATING FACTOR COMPLEXED WITH ADP AND MG2+                                                                   | CHAPERONE                     |
| 2D0P | STRCUTURE OF DIOL DEHYDRATASE-REACTIVATING FACTOR IN NUCLEOTIDE FREE FORM                                                                       | CHAPERONE                     |
| 2D0Q | COMPLEX OF FE-TYPE NHASE WITH CYCLOHEXYL ISOCYANIDE, PHOTO-ACTIVATED FOR 1HR AT 277K                                                            | LYASE                         |
| 2D0V | CRYSTAL STRUCTURE OF METHANOL DEHYDROGENASE FROM HYPHOMICROBIUM DENITRIFICANS                                                                   | OXIDOREDUCTASE                |
| 2D10 | CRYSTAL STRUCTURE OF THE RADIXIN FERM DOMAIN COMPLEXED WITH THE NHERF-1 C-TERMINAL TAIL PEPTIDE                                                 | CELL ADHESION                 |
| 2D11 | CRYSTAL STRUCTURE OF THE RADIXIN FERM DOMAIN COMPLEXED WITH THE NHERF-2 C-TERMINAL TAIL PEPTIDE                                                 | CELL ADHESION                 |
| 2D1J | FACTOR XA IN COMPLEX WITH THE INHIBITOR 2-[[4-[(5-CHLOROINDOL-2-YL)SULFONYL]PIPERAZIN-1-YL] CARBONYL]THIENO[3,2-B]PYRIDINE N-OXIDE              | HYDROLASE                     |
| 2D1K | TERNARY COMPLEX OF THE WH2 DOMAIN OF MIM WITH ACTIN-DNASE I                                                                                     | STRUCTURAL PROTEIN            |
| 2D1P | CRYSTAL STRUCTURE OF HETEROHEXAMERIC TUSBCD PROTEINS, WHICH ARE CRUCIAL FOR THE TRNA MODIFICATION                                               | TRANSLATION                   |
| 2D26 | ACTIVE SITE DISTORTION IS SUFFICIENT FOR PROTEINASE INHIBIT SECOND CRYSTAL STRUCTURE OF COVALENT SERPIN-PROTEINASE COMPLEX                      | HYDROLASE/HYDROLASE INHIBITOR |
| 2D2C | CRYSTAL STRUCTURE OF CYTOCHROME B6F COMPLEX WITH DBMIB FROM M. LAMINOSUS                                                                        | PHOTOSYNTHESIS                |

|      |                                                                                                                 |                                   |
|------|-----------------------------------------------------------------------------------------------------------------|-----------------------------------|
| 2D2M | STRUCTURE OF AN EXTRACELLULAR GIANT HEMOGLOBIN OF THE GUTLESS BEARD WORM OLIGOBRACHIA MASHIKOI                  | OXYGEN STORAGE/TRANSPORT          |
| 2D2N | STRUCTURE OF AN EXTRACELLULAR GIANT HEMOGLOBIN OF THE GUTLESS BEARD WORM OLIGOBRACHIA MASHIKOI                  | OXYGEN STORAGE/TRANSPORT          |
| 2D31 | CRYSTAL STRUCTURE OF DISULFIDE-LINKED HLA-G DIMER                                                               | IMMUNE SYSTEM/CELL CYCLE          |
| 2D3G | DOUBLE SIDED UBIQUITIN BINDING OF HRS-UIM                                                                       | PROTEIN TRANSPORT                 |
| 2D3O | STRUCTURE OF RIBOSOME BINDING DOMAIN OF THE TRIGGER FACTOR ON THE 50S RIBOSOMAL SUBUNIT FROM D. RADIODURANS     | RIBOSOME                          |
| 2D3T | FATTY ACID BETA-OXIDATION MULTIENZYME COMPLEX FROM PSEUDOMONAS FRAGI, FORM V                                    | LYASE, OXIDOREDUCTASE/TRANSFERASE |
| 2D5R | CRYSTAL STRUCTURE OF A TOB-HCAF1 COMPLEX                                                                        | TRANSCRIPTION                     |
| 2D5W | THE CRYSTAL STRUCTURE OF OLIGOPEPTIDE BINDING PROTEIN FROM THERMUS THERMOPHILUS HB8 COMPLEXED WITH PENTAPEPTIDE | PEPTIDE BINDING PROTEIN           |
| 2D5X | CRYSTAL STRUCTURE OF CARBONMONOXY HORSE HEMOGLOBIN COMPLEXED WITH L35                                           | OXYGEN STORAGE/TRANSPORT          |
| 2D5Z | CRYSTAL STRUCTURE OF T-STATE HUMAN HEMOGLOBIN COMPLEXED WITH THREE L35 MOLECULES                                | OXYGEN STORAGE/TRANSPORT          |
| 2D60 | CRYSTAL STRUCTURE OF DEOXY HUMAN HEMOGLOBIN COMPLEXED WITH TWO L35 MOLECULES                                    | OXYGEN STORAGE/TRANSPORT          |
| 2D6F | CRYSTAL STRUCTURE OF GLU-TRNA(GLN) AMIDOTRANSFERASE IN THE COMPLEX WITH TRNA(GLN)                               | LIGASE/RNA                        |
| 2D74 | CRYSTAL STRUCTURE OF TRANSLATION INITIATION FACTOR AIF2BETAGAMMA HETERODIMER                                    | TRANSLATION                       |
| 2D7C | CRYSTAL STRUCTURE OF HUMAN RAB11 IN COMPLEX WITH FIP3 RAB-BINDING DOMAIN                                        | PROTEIN TRANSPORT                 |
| 2D7D | STRUCTURAL INSIGHTS INTO THE CRYPTIC DNA DEPENDENT ATP-ASE ACTIVITY OF UVRB                                     | HYDROLASE/DNA                     |
| 2D7S | FOOT AND MOUTH DISEASE VIRUS RNA-DEPENDENT RNA POLYMERASE IN COMPLEX WITH VPG PROTEIN                           | TRANSFERASE                       |
| 2D9Q | CRYSTAL STRUCTURE OF THE HUMAN GCSF-RECEPTOR SIGNALING COMPLEX                                                  | SIGNALING PROTEIN/CYTOKINE        |
| 2DBU | CRYSTAL STRUCTURE OF GAMMA-GLUTAMYLTRANSPEPTIDASE FROM ESCHERICHIA COLI                                         | TRANSFERASE                       |
| 2DBW | CRYSTAL STRUCTURE OF GAMMA-GLUTAMYLTRANSPEPTIDASE FROM ESCHERICHIA COLI ACYL-ENZYME INTERMEDIATE                | TRANSFERASE                       |
| 2DBX | CRYSTAL STRUCTURE OF GAMMA-GLUTAMYLTRANSPEPTIDASE FROM ESCHERICHIA COLI COMPLEXED WITH L-GLUTAMATE              | TRANSFERASE                       |
| 2DCU | CRYSTAL STRUCTURE OF TRANSLATION INITIATION FACTOR AIF2BETAGAMMA HETERODIMER WITH GDP                           | TRANSLATION                       |
| 2DD4 | THIOCYANATE HYDROLASE (SCNASE) FROM THIOBACILLUS THIOPARUS RECOMBINANT APO-ENZYME                               | HYDROLASE                         |
| 2DD5 | THIOCYANATE HYDROLASE (SCNASE) FROM THIOBACILLUS THIOPARUS NATIVE HOLO-ENZYME                                   | HYDROLASE                         |

|      |                                                                                                                                                                                                          |                                       |
|------|----------------------------------------------------------------------------------------------------------------------------------------------------------------------------------------------------------|---------------------------------------|
| 2DD8 | CRYSTAL STRUCTURE OF SARS-COV SPIKE RECEPTOR-BINDING DOMAIN COMPLEXED WITH NEUTRALIZING ANTIBODY                                                                                                         | IMMUNE SYSTEM/VIRAL PROTEIN           |
| 2DDQ | CRYSTAL STRUCTURE OF THE FAB FRAGMENT OF A R310 ANTIBODY COMPLEXED WITH (R)-HNE-HISTIDINE ADDUCT                                                                                                         | IMMUNE SYSTEM                         |
| 2DE5 | CRYSTAL STRUCTURE OF THE ELECTRON TRANSFER COMPLEX BETWEEN OXYGENASE AND FERREDOXIN IN CARBAZOLE 1,9A-DIOXYGENASE                                                                                        | OXIDOREDUCTASE                        |
| 2DE6 | THE REDUCED COMPLEX BETWEEN OXYGENASE AND FERREDOXIN IN CARBAZOLE 1,9A-DIOXYGENASE                                                                                                                       | OXIDOREDUCTASE                        |
| 2DE7 | THE SUBSTRATE-BOUND COMPLEX BETWEEN OXYGENASE AND FERREDOXIN IN CARBAZOLE 1,9A-DIOXYGENASE                                                                                                               | OXIDOREDUCTASE                        |
| 2DEW | CRYSTAL STRUCTURE OF HUMAN PEPTIDYLARGININE DEIMINASE 4 IN COMPLEX WITH HISTONE H3 N-TERMINAL TAIL INCLUDING ARG8                                                                                        | HYDROLASE                             |
| 2DEX | CRYSTAL STRUCTURE OF HUMAN PEPTIDYLARGININE DEIMINASE 4 IN COMPLEX WITH HISTONE H3 N-TERMINAL PEPTIDE INCLUDING ARG17                                                                                    | HYDROLASE                             |
| 2DEY | CRYSTAL STRUCTURE OF HUMAN PEPTIDYLARGININE DEIMINASE 4 IN COMPLEX WITH HISTONE H4 N-TERMINAL TAIL INCLUDING ARG3                                                                                        | HYDROLASE                             |
| 2DF4 | STRUCTURE OF TRNA-DEPENDENT AMIDOTRANSFERASE GATCAB COMPLEXED WITH MN2+                                                                                                                                  | LIGASE                                |
| 2DFK | CRYSTAL STRUCTURE OF THE CDC42-COLLYBISTIN II COMPLEX                                                                                                                                                    | CELL CYCLE                            |
| 2DFS | 3-D STRUCTURE OF MYOSIN-V INHIBITED STATE                                                                                                                                                                | CONTRACTILE PROTEIN/TRANSPORT PROTEIN |
| 2DFX | CRYSTAL STRUCTURE OF THE CARBOXY TERMINAL DOMAIN OF COLICIN E5 COMPLEXED WITH ITS INHIBITOR                                                                                                              | HYDROLASE                             |
| 2DG5 | CRYSTAL STRUCTURE OF GAMMA-GLUTAMYL TRANSPEPTIDASE FROM ESCHERICHIA COLI IN COMPLEX WITH HYDROLYZED GLUTATHIONE                                                                                          | TRANSFERASE                           |
| 2DHB | THREE DIMENSIONAL FOURIER SYNTHESIS OF HORSE DEOXYHAEMOGLOBIN AT 2.8 ANGSTROMS RESOLUTION                                                                                                                | OXYGEN TRANSPORT                      |
| 2DJF | CRYSTAL STRUCTURE OF HUMAN DIPEPTIDYL PEPTIDASE I (CATHEPSIN C) IN COMPLEX WITH THE INHIBITOR GLY-PHE-CHN2                                                                                               | HYDROLASE                             |
| 2DJG | RE-DETERMINATION OF THE NATIVE STRUCTURE OF HUMAN DIPEPTIDYL PEPTIDASE I (CATHEPSIN C)                                                                                                                   | HYDROLASE                             |
| 2DKO | EXTENDED SUBSTRATE RECOGNITION IN CASPASE-3 REVEALED BY HIGH RESOLUTION X-RAY STRUCTURE ANALYSIS                                                                                                         | HYDROLASE                             |
| 2DN1 | 1.25A RESOLUTION CRYSTAL STRUCTURE OF HUMAN HEMOGLOBIN IN THE OXY FORM                                                                                                                                   | OXYGEN STORAGE/TRANSPORT              |
| 2DN2 | 1.25A RESOLUTION CRYSTAL STRUCTURE OF HUMAN HEMOGLOBIN IN THE DEOXY FORM                                                                                                                                 | OXYGEN STORAGE/TRANSPORT              |
| 2DN3 | 1.25A RESOLUTION CRYSTAL STRUCTURE OF HUMAN HEMOGLOBIN IN THE CARBONMONOXY FORM                                                                                                                          | OXYGEN STORAGE/TRANSPORT              |
| 2DO2 | DESIGN OF SPECIFIC INHIBITORS OF PHOSPHOLIPASE A2: CRYSTAL STRUCTURE OF THE COMPLEX FORMED BETWEEN A GROUP II CYS 49 PHOSPHOLIPASE A2 AND A DESIGNED PENTAPEPTIDE ALA-LEU-ALA-SER-LYS AT 2.6A RESOLUTION | HYDROLASE                             |
| 2DOH | THE X-RAY CRYSTALLOGRAPHIC STRUCTURE OF THE ANGIOGENESIS                                                                                                                                                 | HYDROLASE                             |

|      | INHIBITOR, ANGIOSTATIN, BOUND A TO A PEPTIDE FROM THE GROUP A STREPTOCOCCAL SURFACE PROTEIN PAM                                                |                                        |
|------|------------------------------------------------------------------------------------------------------------------------------------------------|----------------------------------------|
| 2DOI | THE X-RAY CRYSTALLOGRAPHIC STRUCTURE OF THE ANGIOGENESIS INHIBITOR, ANGIOSTATIN, BOUND TO A PEPTIDE FROM THE GROUP A STREPTOCOCCUS PROTEIN PAM | HYDROLASE                              |
| 2DOQ | CRYSTAL STRUCTURE OF SF11P/CDC31P COMPLEX                                                                                                      | CELL CYCLE                             |
| 2DP4 | CRYSTAL STRUCTURE OF THE COMPLEX FORMED BETWEEN PROTEINASE K AND A HUMAN LACTOFERRIN FRAGMENT AT 2.9 Å RESOLUTION                              | HYDROLASE                              |
| 2DPP | CRYSTAL STRUCTURE OF THERMOSTABLE BACILLUS SP. RAPC8 NITRILE HYDRATASE                                                                         | LYASE                                  |
| 2DQC | CRYSTAL STRUCTURE OF HYHEL-10 FV MUTANT(HY33F) COMPLEXED WITH HEN EGG LYSOZYME                                                                 | IMMUNE SYSTEM/HYDROLASE                |
| 2DQD | CRYSTAL STRUCTURE OF HYHEL-10 FV MUTANT (HY50F) COMPLEXED WITH HEN EGG LYSOZYME                                                                | IMMUNE SYSTEM/HYDROLASE                |
| 2DQE | CRYSTAL STRUCTURE OF HYHEL-10 FV MUTANT (HY53A) COMPLEXED WITH HEN EGG LYSOZYME                                                                | IMMUNE SYSTEM/HYDROLASE                |
| 2DQF | CRYSTAL STRUCTURE OF HYHEL-10 FV MUTANT (Y33AY53A) COMPLEXED WITH HEN EGG LYSOZYME                                                             | IMMUNE SYSTEM/HYDROLASE                |
| 2DQG | CRYSTAL STRUCTURE OF HYHEL-10 FV MUTANT (HY53F) COMPLEXED WITH HEN EGG LYSOZYME                                                                | IMMUNE SYSTEM/HYDROLASE                |
| 2DQH | CRYSTAL STRUCTURE OF HYHEL-10 FV MUTANT (HY58A) COMPLEXED WITH HEN EGG LYSOZYME                                                                | IMMUNE SYSTEM/HYDROLASE                |
| 2DQI | CRYSTAL STRUCTURE OF HYHEL-10 FV MUTANT (LY50A) COMPLEXED WITH HEN EGG LYSOZYME                                                                | IMMUNE SYSTEM/HYDROLASE                |
| 2DQJ | CRYSTAL STRUCTURE OF HYHEL-10 FV (WILD-TYPE) COMPLEXED WITH HEN EGG LYSOZYME AT 1.8Å RESOLUTION                                                | IMMUNE SYSTEM/HYDROLASE                |
| 2DQK | CRYSTAL STRUCTURE OF THE COMPLEX OF PROTEINASE K WITH A SPECIFIC LACTOFERRIN PEPTIDE VAL-LEU-LEU-HIS AT 1.93 Å RESOLUTION                      | HYDROLASE                              |
| 2DQN | STRUCTURE OF TRNA-DEPENDENT AMIDOTRANSFERASE GATCAB COMPLEXED WITH ASN                                                                         | LIGASE                                 |
| 2DQT | HIGH RESOLUTION CRYSTAL STRUCTURE OF THE COMPLEX OF THE HYDROLYTIC ANTIBODY FAB 6D9 AND A TRANSITION-STATE ANALOG                              | IMMUNE SYSTEM                          |
| 2DQU | CRYSTAL FORM II: HIGH RESOLUTION CRYSTAL STRUCTURE OF THE COMPLEX OF THE HYDROLYTIC ANTIBODY FAB 6D9 AND A TRANSITION-STATE ANALOG             | IMMUNE SYSTEM                          |
| 2DS2 | CRYSTAL STRUCTURE OF MABINLIN II                                                                                                               | PLANT PROTEIN                          |
| 2DS8 | STRUCTURE OF THE ZBD-XB COMPLEX                                                                                                                | METAL BINDING PROTEIN, PROTEIN BINDING |
| 2DSP | STRUCTURAL BASIS FOR THE INHIBITION OF INSULIN-LIKE GROWTH FACTORS BY IGF BINDING PROTEINS                                                     | PROTEIN BINDING/HORMONE/GROWTH FACTOR  |
| 2DSQ | STRUCTURAL BASIS FOR THE INHIBITION OF INSULIN-LIKE GROWTH FACTORS BY IGF BINDING PROTEINS                                                     | PROTEIN BINDING/HORMONE/GROWTH FACTOR  |
| 2DSR | STRUCTURAL BASIS FOR THE INHIBITION OF INSULIN-LIKE GROWTH FACTORS BY IGF BINDING PROTEINS                                                     | PROTEIN BINDING/HORMONE/GROWTH FACTOR  |

|      |                                                                                                                               |                                     |
|------|-------------------------------------------------------------------------------------------------------------------------------|-------------------------------------|
| 2DTG | INSULIN RECEPTOR (IR) ECTODOMAIN IN COMPLEX WITH FAB'S                                                                        | HORMONE RECEPTOR/IMMUNE SYSTEM      |
| 2DTM | THERMODYNAMIC AND STRUCTURAL ANALYSES OF HYDROLYTIC MECHANISM BY CATALYTIC ANTIBODIES                                         | IMMUNE SYSTEM                       |
| 2DUJ | CRYSTAL STRUCTURE OF THE COMPLEX FORMED BETWEEN PROTEINASE K AND A SYNTHETIC PEPTIDE LEU-LEU-PHE-ASN-ASP AT 1.67 Å RESOLUTION | HYDROLASE                           |
| 2DVQ | CRYSTAL STRUCTURE ANALYSIS OF THE N-TERMINAL BROMODOMAIN OF HUMAN BRD2 COMPLEXED WITH ACETYLATED HISTONE H4 PEPTIDE           | TRANSCRIPTION                       |
| 2DVR | CRYSTAL STRUCTURE ANALYSIS OF THE N-TERMINAL BROMODOMAIN OF HUMAN BRD2 COMPLEXED WITH ACETYLATED HISTONE H4 PEPTIDE           | TRANSCRIPTION                       |
| 2DVS | CRYSTAL STRUCTURE ANALYSIS OF THE N-TERMINAL BROMODOMAIN OF HUMAN BRD2 COMPLEXED WITH ACETYLATED HISTONE H4 PEPTIDE           | TRANSCRIPTION                       |
| 2DVW | STRUCTURE OF THE ONCOPROTEIN GANKYRIN IN COMPLEX WITH S6 ATPASE OF THE 26S PROTEASOME                                         | CELL CYCLE/PROTEIN-BINDING          |
| 2DWD | CRYSTAL STRUCTURE OF KCSA-FAB-TBA COMPLEX IN TL+                                                                              | MEMBRANE PROTEIN                    |
| 2DWE | CRYSTAL STRUCTURE OF KCSA-FAB-TBA COMPLEX IN RB+                                                                              | MEMBRANE PROTEIN                    |
| 2DWZ | STRUCTURE OF THE ONCOPROTEIN GANKYRIN IN COMPLEX WITH S6 ATPASE OF THE 26S PROTEASOME                                         | ONCOPROTEIN                         |
| 2DX5 | THE COMPLEX STRUCTURE BETWEEN THE MOUSE EAP45-GLUE DOMAIN AND UBIQUITIN                                                       | PROTEIN TRANSPORT/SIGNALING PROTEIN |
| 2DXB | RECOMBINANT THIOCYANATE HYDROLASE COMPRISING PARTIALLY-MODIFIED COBALT CENTERS                                                | HYDROLASE                           |
| 2DXC | RECOMBINANT THIOCYANATE HYDROLASE, FULLY-MATURED FORM                                                                         | HYDROLASE                           |
| 2DXM | NEUTRON STRUCTURE ANALYSIS OF DEOXY HUMAN HEMOGLOBIN                                                                          | OXYGEN STORAGE/TRANSPORT            |
| 2DXP | CRYSTAL STRUCTURE OF THE COMPLEX OF THE ARCHAEL SULFOLOBUS PTP-FOLD PHOSPHATASE WITH PHOSPHOPEPTIDES A-(P)Y-R                 | HYDROLASE                           |
| 2DYM | THE CRYSTAL STRUCTURE OF SACCHAROMYCES CEREVISIAE ATG5-ATG16(1-46) COMPLEX                                                    | PROTEIN TURNOVER/PROTEIN TURNOVER   |
| 2DYO | THE CRYSTAL STRUCTURE OF SACCHAROMYCES CEREVISIAE ATG5-ATG16(1-57) COMPLEX                                                    | PROTEIN TURNOVER/PROTEIN TURNOVER   |
| 2DYP | CRYSTAL STRUCTURE OF LILRB2(LIR2/ILT4/CD85D) COMPLEXED WITH HLA-G                                                             | IMMUNE SYSTEM                       |
| 2DYR | BOVINE HEART CYTOCHROME C OXIDASE AT THE FULLY OXIDIZED STATE                                                                 | OXIDOREDUCTASE                      |
| 2DYS | BOVINE HEART CYTOCHROME C OXIDASE MODIFIED BY DCCD                                                                            | OXIDOREDUCTASE                      |
| 2DZN | CRYSTAL STRUCTURE ANALYSIS OF YEAST NAS6P COMPLEXED WITH THE PROTEASOME SUBUNIT, RPT3                                         | PROTEIN BINDING                     |
| 2DZO | CRYSTAL STRUCTURE ANALYSIS OF YEAST NAS6P COMPLEXED WITH THE PROTEASOME SUBUNIT, RPT3                                         | PROTEIN BINDING                     |
| 2E0X | CRYSTAL STRUCTURE OF GAMMA-GLUTAMYLTRANSPEPTIDASE FROM ESCHERICHIA COLI (MONOCLINIC FORM)                                     | TRANSFERASE                         |



|          |                                                                                                                     |                                  |
|----------|---------------------------------------------------------------------------------------------------------------------|----------------------------------|
| 2E0Y     | CRYSTAL STRUCTURE OF THE SAMARIUM DERIVATIVE OF MATURE GAMMA-GLUTAMYLTRANSPEPTIDASE FROM ESCHERICHIA COLI           | TRANSFERASE                      |
| 2E1M     | CRYSTAL STRUCTURE OF L-GLUTAMATE OXIDASE FROM STREPTOMYCES SP. X-119-6                                              | OXIDOREDUCTASE                   |
| 2E2D     | FLEXIBILITY AND VARIABILITY OF TIMP BINDING: X-RAY STRUCTURE OF THE COMPLEX BETWEEN COLLAGENASE-3/MMP-13 AND TIMP-2 | HYDROLASE/HYDROLASE INHIBITOR    |
| 2E2H     | RNA POLYMERASE II ELONGATION COMPLEX AT 5 MM MG <sup>2+</sup> WITH GTP                                              | TRANSCRIPTION/DNA/RNA            |
| 2E2I     | RNA POLYMERASE II ELONGATION COMPLEX IN 5 MM MG <sup>2+</sup> WITH 2'-DGTP                                          | TRANSCRIPTION/DNA/RNA            |
| 2E2J     | RNA POLYMERASE II ELONGATION COMPLEX IN 5 MM MG <sup>2+</sup> WITH GMPCPP                                           | TRANSCRIPTION/DNA/RNA            |
| 2.00E+31 | STRUCTURAL BASIS FOR SELECTION OF GLYCOSYLATED SUBSTRATE BY SCFFBS1 UBIQUITIN LIGASE                                | LIGASE                           |
| 2.00E+32 | STRUCTURAL BASIS FOR SELECTION OF GLYCOSYLATED SUBSTRATE BY SCFFBS1 UBIQUITIN LIGASE                                | LIGASE                           |
| 2.00E+33 | STRUCTURAL BASIS FOR SELECTION OF GLYCOSYLATED SUBSTRATE BY SCFFBS1 UBIQUITIN LIGASE                                | LIGASE/HYDROLASE                 |
| 2E3K     | CRYSTAL STRUCTURE OF THE HUMAN BRD2 SECOND BROMODOMAIN IN COMPLEXED WITH THE ACETYLATED HISTONE H4 PEPTIDE          | TRANSCRIPTION                    |
| 2E3X     | CRYSTAL STRUCTURE OF RUSSELL'S VIPER VENOM METALLOPROTEINASE                                                        | HYDROLASE, BLOOD CLOTTING, TOXIN |
| 2E5L     | A SNAPSHOT OF THE 30S RIBOSOMAL SUBUNIT CAPTURING MRNA VIA THE SHINE- DALGARNO INTERACTION                          | RIBOSOME                         |
| 2.00E+74 | CRYSTAL STRUCTURE OF THE CYTOCHROME B6F COMPLEX FROM M.LAMINOSUS                                                    | PHOTOSYNTHESIS                   |
| 2.00E+75 | CRYSTAL STRUCTURE OF THE CYTOCHROME B6F COMPLEX WITH 2-NONYL-4-HYDROXYQUINOLINE N-OXIDE (NQNO) FROM M.LAMINOSUS     | PHOTOSYNTHESIS                   |
| 2.00E+76 | CRYSTAL STRUCTURE OF THE CYTOCHROME B6F COMPLEX WITH TRIDECYL-STIGMATELLIN (TDS) FROM M.LAMINOSUS                   | PHOTOSYNTHESIS                   |
| 2E7L     | STRUCTURE OF A HIGH-AFFINITY MUTANT OF THE 2C TCR IN COMPLEX WITH LD/QL9                                            | IMMUNE SYSTEM                    |
| 2E9W     | CRYSTAL STRUCTURE OF THE EXTRACELLULAR DOMAIN OF KIT IN COMPLEX WITH STEM CELL FACTOR (SCF)                         | TRANSFERASE/HORMONE              |
| 2E9X     | THE CRYSTAL STRUCTURE OF HUMAN GINS CORE COMPLEX                                                                    | REPLICATION                      |
| 2EAX     | CRYSTAL STRUCTURE OF HUMAN PGRP-IBETAC IN COMPLEX WITH GLYCOSAMYL MURAMYL PENTAPEPTIDE                              | SUGAR BINDING PROTEIN            |
| 2EC6     | PLACOPECTEN STRIATED MUSCLE MYOSIN II                                                                               | CONTRACTILE PROTEIN              |
| 2EC9     | CRYSTAL STRUCTURE ANALYSIS OF HUMAN FACTOR VIIA , SOULUBLE TISSUE FACTOR COMPLEXED WITH BCX-3607                    | BLOOD CLOTTING                   |
| 2EEO     | CRYSTAL STRUCTURE OF T.TH. HB8 L-ASPARTATE-ALPHA-DECARBOXYLASE COMPLEXED WITH FUMARATE                              | LYASE                            |
| 2EFA     | NEUTRON CRYSTAL STRUCTURE OF CUBIC INSULIN AT PD6.6                                                                 | HORMONE/GROWTH FACTOR            |

|      |                                                                                                                                                                                                             |                                |
|------|-------------------------------------------------------------------------------------------------------------------------------------------------------------------------------------------------------------|--------------------------------|
| 2EFC | ARA7-GDP/ATVPS9A                                                                                                                                                                                            | TRANSPORT PROTEIN              |
| 2EFD | ARA7/ATVPS9A                                                                                                                                                                                                | TRANSPORT PROTEIN              |
| 2EFE | ARA7-GDPNH2/ATVPS9A                                                                                                                                                                                         | TRANSPORT PROTEIN              |
| 2EFH | ARA7-GDP/ATVPS9A(D185N)                                                                                                                                                                                     | TRANSPORT PROTEIN              |
| 2EG4 | CRYSTAL STRUCTURE OF PROBABLE THIOSULFATE SULFURTRANSFERASE                                                                                                                                                 | TRANSFERASE                    |
| 2EH7 | CRYSTAL STRUCTURE OF HUMANIZED KR127 FAB                                                                                                                                                                    | IMMUNE SYSTEM                  |
| 2EH8 | CRYSTAL STRUCTURE OF THE COMPLEX OF HUMANIZED KR127 FAB AND PRES1 PEPTIDE EPITOPE                                                                                                                           | IMMUNE SYSTEM                  |
| 2EHB | THE STRUCTURE OF THE C-TERMINAL DOMAIN OF THE PROTEIN KINASE ATSO2 BOUND TO THE CALCIUM SENSOR ATSO3                                                                                                        | SIGNALLING PROTEIN/TRANSFERASE |
| 2EHO | CRYSTAL STRUCTURE OF HUMAN GINS COMPLEX                                                                                                                                                                     | REPLICATION                    |
| 2EI6 | FACTOR XA IN COMPLEX WITH THE INHIBITOR (-)-CIS-N1-[(5-CHLOROINDOL-2-YL)CARBONYL]-N2-[(5-METHYL-4,5,6,7-TETRAHYDROTHIAZOLO[5,4-C]PYRIDIN-2-YL)CARBONYL]-1,2-CYCLOHEXANEDIAMINE                              | HYDROLASE                      |
| 2EI7 | FACTOR XA IN COMPLEX WITH THE INHIBITOR TRANS-N1-[(5-CHLOROINDOL-2-YL)CARBONYL]-N2-[(5-METHYL-4,5,6,7-TETRAHYDROTHIAZOLO[5,4-C]PYRIDIN-2-YL)CARBONYL]-1,2-CYCLOHEXANEDIAMINE                                | HYDROLASE                      |
| 2EI8 | FACTOR XA IN COMPLEX WITH THE INHIBITOR (1S,2R,4S)-N1-[(5-CHLOROINDOL-2-YL)CARBONYL]-4-(N,N-DIMETHYLCARBAMOYL)-N2-[(5-METHYL-4,5,6,7-TETRAHYDROTHIAZOLO[5,4-C]PYRIDIN-2-YL)CARBONYL]-1,2-CYCLOHEXANEDIAMINE | HYDROLASE                      |
| 2EIJ | BOVINE HEART CYTOCHROME C OXIDASE IN THE FULLY REDUCED STATE                                                                                                                                                | OXIDOREDUCTASE                 |
| 2EIK | CADMIUM ION BINDING STRUCTURE OF BOVINE HEART CYTOCHROME C OXIDASE IN THE FULLY REDUCED STATE                                                                                                               | OXIDOREDUCTASE                 |
| 2EIL | CADMIUM ION BINDING STRUCTURE OF BOVINE HEART CYTOCHROME C OXIDASE IN THE FULLY OXIDIZED STATE                                                                                                              | OXIDOREDUCTASE                 |
| 2EIM | ZINC ION BINDING STRUCTURE OF BOVINE HEART CYTOCHROME C OXIDASE IN THE FULLY REDUCED STATE                                                                                                                  | OXIDOREDUCTASE                 |
| 2EIN | ZINC ION BINDING STRUCTURE OF BOVINE HEART CYTOCHROME C OXIDASE IN THE FULLY OXIDIZED STATE                                                                                                                 | OXIDOREDUCTASE                 |
| 2EIZ | CRYSTAL STRUCTURE OF HUMANIZED HYHEL-10 FV MUTANT(HW47Y)-HEN LYSOZYME COMPLEX                                                                                                                               | IMMUNE SYSTEM/HYDROLASE        |
| 2EJF | CRYSTAL STRUCTURE OF THE BIOTIN PROTEIN LIGASE (MUTATIONS R48A AND K111A) AND BIOTIN CARBOXYL CARRIER PROTEIN COMPLEX FROM PYROCOCCLUS HORIKOSHII OT3                                                       | LIGASE                         |
| 2EJG | CRYSTAL STRUCTURE OF THE BIOTIN PROTEIN LIGASE (MUTATION R48A) AND BIOTIN CARBOXYL CARRIER PROTEIN COMPLEX FROM PYROCOCCLUS HORIKOSHII OT3                                                                  | LIGASE                         |
| 2EKE | STRUCTURE OF A SUMO-BINDING-MOTIF MIMIC BOUND TO SMT3P-UBC9P: CONSERVATION OF A NONCOVALENT UBIQUITIN-LIKE PROTEIN-E2 COMPLEX AS A PLATFORM FOR SELECTIVE INTERACTIONS WITHIN A SUMO PATHWAY                | LIGASE/PROTEIN BINDING         |

|      |                                                                                                                                                       |                                        |
|------|-------------------------------------------------------------------------------------------------------------------------------------------------------|----------------------------------------|
| 2EKS | CRYSTAL STRUCTURE OF HUMANIZED HYHEL-10 FV-HEN LYSOZYME COMPLEX                                                                                       | IMMUNE SYSTEM/HYDROLASE                |
| 2EKV | THE CRYSTAL STRUCTURE OF RIGOR LIKE SQUID MYOSIN S1 IN THE ABSENCE OF NUCLEOTIDE                                                                      | CONTRACTILE PROTEIN                    |
| 2EKW | THE CRYSTAL STRUCTURE OF SQUID MYOSIN S1 IN THE PRESENCE OF SO <sub>4</sub> <sup>2-</sup>                                                             | CONTRACTILE PROTEIN                    |
| 2EMS | CRYSTAL STRUCTURE ANALYSIS OF THE RADIXIN FERM DOMAIN COMPLEXED WITH ADHESION MOLECULE CD43                                                           | CELL ADHESION                          |
| 2EMT | CRYSTAL STRUCTURE ANALYSIS OF THE RADIXIN FERM DOMAIN COMPLEXED WITH ADHESION MOLECULE PSGL-1                                                         | CELL ADHESION                          |
| 2EPH | CRYSTAL STRUCTURE OF FRUCTOSE-BISPHOSPHATE ALDOLASE FROM PLASMODIUM FALCIPARUM IN COMPLEX WITH TRAP-TAIL DETERMINED AT 2.7 ANGSTROM RESOLUTION        | LYASE                                  |
| 2EQ7 | CRYSTAL STRUCTURE OF LIPOAMIDE DEHYDROGENASE FROM THERMUS THERMOPHILUS HB8 WITH PSBDO                                                                 | OXIDOREDUCTASE                         |
| 2EZ0 | CRYSTAL STRUCTURE OF THE S107A/E148Q/Y445A MUTANT OF ECCLC, IN COMPLEX WITH A FAB FRAGMENT                                                            | MEMBRANE PROTEIN                       |
| 2F0Y | CRYSTAL STRUCTURE OF HUMAN PROTEIN FARNESYLTRANSFERASE COMPLEXED WITH FARNESYL DIPHOSPHATE AND HYDANTOIN DERIVATIVE                                   | TRANSFERASE                            |
| 2F16 | CRYSTAL STRUCTURE OF THE YEAST 20S PROTEASOME IN COMPLEX WITH BORTEZOMIB                                                                              | HYDROLASE                              |
| 2F19 | THREE-DIMENSIONAL STRUCTURE OF TWO CRYSTAL FORMS OF FAB R19.9, FROM A MONOCLONAL ANTI-ARSONATE ANTIBODY                                               | IMMUNOGLOBULIN                         |
| 2F2A | STRUCTURE OF TRNA-DEPENDENT AMIDOTRANSFERASE GATCAB COMPLEXED WITH GLN                                                                                | LIGASE                                 |
| 2F2C | X-RAY STRUCTURE OF HUMAN CDK6-VCYCLIN WITH THE INHIBITOR AMINOPURVALANOL                                                                              | CELL CYCLE/TRANSFERASE                 |
| 2F2F | CRYSTAL STRUCTURE OF CYTOLETHAL DISTENDING TOXIN (CDT) FROM ACTINOBACILLUS ACTINOMYCETEMCOMITANS                                                      | TOXIN                                  |
| 2F2L | CRYSTAL STRUCTURE OF TRACHEAL CYTOTOXIN (TCT) BOUND TO THE ECTODOMAIN COMPLEX OF PEPTIDOGLYCAN RECOGNITION PROTEINS LCA (PGRP-LCA) AND LCX (PGRP-LCX) | MEMBRANE PROTEIN, IMMUNE SYSTEM, TOXIN |
| 2F31 | CRYSTAL STRUCTURE OF THE AUTOINHIBITORY SWITCH IN FORMIN MDIA1; THE DID/DAD COMPLEX                                                                   | STRUCTURAL PROTEIN                     |
| 2F3C | CRYSTAL STRUCTURE OF INFESTIN 1, A KAZAL-TYPE SERINEPROTEASE INHIBITOR, IN COMPLEX WITH TRYPSIN                                                       | HYDROLASE/HYDROLASE INHIBITOR          |
| 2F3Y | CALMODULIN/IQ DOMAIN COMPLEX                                                                                                                          | METAL BINDING PROTEIN                  |
| 2F3Z | CALMODULIN/IQ-AA DOMAIN COMPLEX                                                                                                                       | METAL BINDING PROTEIN                  |
| 2F43 | RAT LIVER F1-ATPASE                                                                                                                                   | HYDROLASE                              |
| 2F49 | CRYSTAL STRUCTURE OF FUS3 IN COMPLEX WITH A STE5 PEPTIDE                                                                                              | TRANSFERASE                            |
| 2F4M | THE MOUSE PNGASE-HR23 COMPLEX REVEALS A COMPLETE REMODULATION OF THE PROTEIN-PROTEIN INTERFACE COMPARED TO ITS YEAST ORTHOLOGS                        | HYDROLASE                              |

|      |                                                                                                                                                                                |                                  |
|------|--------------------------------------------------------------------------------------------------------------------------------------------------------------------------------|----------------------------------|
| 2F4O | THE MOUSE PNGASE-HR23 COMPLEX REVEALS A COMPLETE REMODULATION OF THE PROTEIN-PROTEIN INTERFACE COMPARED TO ITS YEAST ORTHOLOGS                                                 | HYDROLASE                        |
| 2F4V | 30S RIBOSOME + DESIGNER ANTIBIOTIC                                                                                                                                             | RIBOSOME                         |
| 2F53 | DIRECTED EVOLUTION OF HUMAN T-CELL RECEPTOR CDR2 RESIDUES BY PHAGE DISPLAY DRAMATICALLY ENHANCES AFFINITY FOR COGNATE PEPTIDE-MHC WITHOUT APPARENT CROSS-REACTIVITY            | IMMUNE SYSTEM                    |
| 2F54 | DIRECTED EVOLUTION OF HUMAN T CELL RECEPTOR CDR2 RESIDUES BY PHAGE DISPLAY DRAMATICALLY ENHANCES AFFINITY FOR COGNATE PEPTIDE-MHC WITHOUT INCREASING APPARENT CROSS-REACTIVITY | IMMUNE SYSTEM                    |
| 2F58 | IGG1 FAB FRAGMENT (58.2) COMPLEX WITH 12-RESIDUE CYCLIC PEPTIDE (INCLUDING RESIDUES 315-324 OF HIV-1 GP120) (MN ISOLATE)                                                       | IMMUNE SYSTEM                    |
| 2F5A | CRYSTAL STRUCTURE OF FAB' FROM THE HIV-1 NEUTRALIZING ANTIBODY 2F5                                                                                                             | IMMUNOGLOBULIN                   |
| 2F5B | CRYSTAL STRUCTURE OF FAB' FROM THE HIV-1 NEUTRALIZING ANTIBODY 2F5 IN COMPLEX WITH ITS GP41 EPI TOPE                                                                           | IMMUNOGLOBULIN                   |
| 2F5Z | CRYSTAL STRUCTURE OF HUMAN DIHYDROLIPOAMIDE DEHYDROGENASE (E3) COMPLEXED TO THE E3-BINDING DOMAIN OF HUMAN E3-BINDING PROTEIN                                                  | OXIDOREDUCTASE/PROTEIN BINDING   |
| 2F66 | STRUCTURE OF THE ESCRT-I ENDOSOMAL TRAFFICKING COMPLEX                                                                                                                         | TRANSPORT PROTEIN                |
| 2F69 | TERNARY COMPLEX OF SET7/9 BOUND TO ADOHCY AND A TAF10 PEPTIDE                                                                                                                  | TRANSFERASE                      |
| 2F6A | COLLAGEN ADHESIN AND COLLAGEN COMPLEX STRUCTURE                                                                                                                                | CELL ADHESION/STRUCTURAL PROTEIN |
| 2F6J | CRYSTAL STRUCTURE OF PHD FINGER-LINKER-BROMODOMAIN FRAGMENT OF HUMAN BPTF IN THE H3(1-15)K4ME3 BOUND STATE                                                                     | TRANSCRIPTION                    |
| 2F6M | STRUCTURE OF A VPS23-C:VPS28-N SUBCOMPLEX                                                                                                                                      | TRANSPORT PROTEIN                |
| 2F74 | MURINE MHC CLASS I H-2DB IN COMPLEX WITH HUMAN B2-MICROGLOBULIN AND LCMV-DERIVED IMMUNODMINANT PEPTIDE GP33                                                                    | IMMUNE SYSTEM                    |
| 2F7E | PKA COMPLEXED WITH (S)-2-(1H-INDOL-3-YL)-1-(5-ISOQUINOLIN-6-YL-PYRIDIN-3-YLOXYMETHYL-ETHYLAMINE                                                                                | TRANSFERASE                      |
| 2F7X | PROTEIN KINASE A BOUND TO (S)-2-(1H-INDOL-3-YL)-1-[5-((E)-2-PYRIDIN-4-YL-VINYL)-PYRIDIN-3-YLOXYMETHYL]-ETHYLAMINE                                                              | TRANSFERASE                      |
| 2F7Z | PROTEIN KINASE A BOUND TO (R)-1-(1H-INDOL-3-YLMETHYL)-2-(2-PYRIDIN-4-YL-[1,7]NAPHTYRIDIN-5-YLOXY)-ETHYLAMINE                                                                   | TRANSFERASE                      |
| 2F8E | FOOT AND MOUTH DISEASE VIRUS RNA-DEPENDENT RNA POLYMERASE IN COMPLEX WITH URIDYLYLATED VPG PROTEIN                                                                             | TRANSFERASE                      |
| 2F8N | 2.9 ANGSTROM X-RAY STRUCTURE OF HYBRID MACROH2A NUCLEOSOMES                                                                                                                    | STRUCTURAL PROTEIN/DNA           |
| 2F8X | CRYSTAL STRUCTURE OF ACTIVATED NOTCH, CSL AND MAML ON HES-1 PROMOTER DNA SEQUENCE                                                                                              | TRANSCRIPTION/DNA                |
| 2F93 | K INTERMEDIATE STRUCTURE OF SENSORY RHODOPSIN II/TRANSDUCER COMPLEX IN COMBINATION WITH THE GROUND STATE STRUCTURE                                                             | MEMBRANE PROTEIN                 |

|      |                                                                                                                                                   |                                       |
|------|---------------------------------------------------------------------------------------------------------------------------------------------------|---------------------------------------|
| 2F95 | M INTERMEDIATE STRUCTURE OF SENSORY RHODOPSIN II/TRANSDUCER COMPLEX IN COMBINATION WITH THE GROUND STATE STRUCTURE                                | MEMBRANE PROTEIN                      |
| 2F9B | DISCOVERY OF NOVEL HETEROCYCLIC FACTOR VIIA INHIBITORS                                                                                            | HYDROLASE/BLOOD CLOTTING              |
| 2F9D | 2.5 ANGSTROM RESOLUTION STRUCTURE OF THE SPLICEOSOMAL PROTEIN P14 BOUND TO REGION OF SF3B155                                                      | RNA BINDING PROTEIN                   |
| 2F9I | CRYSTAL STRUCTURE OF THE CARBOXYLTRANSFERASE SUBUNIT OF ACC FROM STAPHYLOCOCCUS AUREUS                                                            | TRANSFERASE                           |
| 2F9J | 3.0 ANGSTROM RESOLUTION STRUCTURE OF A Y22M MUTANT OF THE SPLICEOSOMAL PROTEIN P14 BOUND TO A REGION OF SF3B155                                   | RNA BINDING PROTEIN                   |
| 2F9N | CRYSTAL STRUCTURE OF THE RECOMBINANT HUMAN ALPHA I TRYPTASE MUTANT K192Q/D216G IN COMPLEX WITH LEUPEPTIN                                          | HYDROLASE                             |
| 2F9P | CRYSTAL STRUCTURE OF THE RECOMBINANT HUMAN ALPHA I TRYPTASE MUTANT D216G IN COMPLEX WITH LEUPEPTIN                                                | HYDROLASE                             |
| 2F9U | HCV NS3 PROTEASE DOMAIN WITH NS4A PEPTIDE AND A KETOAMIDE INHIBITOR WITH A P2 NORBORANE                                                           | VIRUS/VIRAL PROTEIN                   |
| 2F9Y | THE CRYSTAL STRUCTURE OF THE CARBOXYLTRANSFERASE SUBUNIT OF ACC FROM ESCHERICHIA COLI                                                             | LIGASE                                |
| 2F9Z | COMPLEX BETWEEN THE CHEMOTAXIS DEAMIDASE CHED AND THE CHEMOTAXIS PHOSPHATASE CHEC FROM THERMOTOGA MARITIMA                                        | SIGNALING PROTEIN                     |
| 2FAI | HUMAN ESTROGEN RECEPTOR ALPHA LIGAND-BINDING DOMAIN IN COMPLEX WITH OBCP-2M AND A GLUCOCORTICOID RECEPTOR INTERACTING PROTEIN 1 NR BOX II PEPTIDE | HORMONE/GROWTH FACTOR RECEPTOR        |
| 2FAK | CRYSTAL STRUCTURE OF SALINOSPORAMIDE A IN COMPLEX WITH THE YEAST 20S PROTEASOME                                                                   | HYDROLASE                             |
| 2FAP | THE STRUCTURE OF THE IMMUNOPHILIN-IMMUNOSUPPRESSANT FKBP12-(C16)-ETHOXY RAPAMYCIN COMPLEX INTERACTING WITH HUMA                                   | COMPLEX (ISOMERASE/KINASE)            |
| 2FAT | AN ANTI-UROKINASE PLASMINOGEN ACTIVATOR RECEPTOR (UPAR) ANTIBODY: CRYSTAL STRUCTURE AND BINDING EPIPOE                                            | IMMUNE SYSTEM                         |
| 2FBJ | REFINED CRYSTAL STRUCTURE OF THE GALACTAN-BINDING IMMUNOGLOBULIN FAB J539 AT 1.95-ANGSTROMS RESOLUTION                                            | IMMUNOGLOBULIN                        |
| 2FBW | AVIAN RESPIRATORY COMPLEX II WITH CARBOXIN BOUND                                                                                                  | OXIDOREDUCTASE                        |
| 2FCW | STRUCTURE OF A COMPLEX BETWEEN THE PAIR OF THE LDL RECEPTOR LIGAND-BINDING MODULES 3-4 AND THE RECEPTOR ASSOCIATED PROTEIN (RAP).                 | LIPID TRANSPORT/ENDOCYTOSIS/CHAPERONE |
| 2FD6 | STRUCTURE OF HUMAN UROKINASE PLASMINOGEN ACTIVATOR IN COMPLEX WITH UROKINASE RECEPTOR AND AN ANTI-UPAR ANTIBODY AT 1.9 A                          | IMMUNE SYSTEM, HYDROLASE              |
| 2FDB | CRYSTAL STRUCTURE OF FIBROBLAST GROWTH FACTOR (FGF)8B IN COMPLEX WITH FGF RECEPTOR (FGFR) 2C                                                      | HORMONE/GROWTH FACTOR/TRANSFERASE     |
| 2FEC | STRUCTURE OF THE E203Q MUTANT OF THE CL-/H+ EXCHANGER CLC-EC1 FROM E.COLI                                                                         | PROTON TRANSPORT, MEMBRANE PROTEIN    |
| 2FED | STRUCTURE OF THE E203Q MUTANT OF THE CL-/H+ EXCHANGER CLC-EC1 FROM E.COLI                                                                         | PROTON TRANSPORT, MEMBRANE PROTEIN    |
| 2FEE | STRUCTURE OF THE CL-/H+ EXCHANGER CLC-EC1 FROM E.COLI IN                                                                                          | PROTON TRANSPORT, MEMBRANE PROTEIN    |

## NABR

|      |                                                                                                                                                                      |                                        |
|------|----------------------------------------------------------------------------------------------------------------------------------------------------------------------|----------------------------------------|
| 2FEP | STRUCTURE OF TRUNCATED CCPA IN COMPLEX WITH P-SER-HPR AND SULFATE IONS                                                                                               | TRANSCRIPTION                          |
| 2FEQ | ORALLY ACTIVE THROMBIN INHIBITORS                                                                                                                                    | HYDROLASE/HYDROLASE INHIBITOR          |
| 2FES | ORALLY ACTIVE THROMBIN INHIBITORS                                                                                                                                    | HYDROLASE/HYDROLASE INHIBITOR          |
| 2FEW | COMPLEX OF ENZYME IIAMTL AND PHOSPHORYLATED ENZYME IIBMTL FROM ESCHERICHIA COLI NMR, RESTRAINED REGULARIZED MEAN STRUCTURE                                           | TRANSFERASE                            |
| 2FF3 | CRYSTAL STRUCTURE OF GELSOLIN DOMAIN 1:N-WASP V2 MOTIF HYBRID IN COMPLEX WITH ACTIN                                                                                  | STRUCTURAL PROTEIN/CONTRACTILE PROTEIN |
| 2FF4 | MYCOBACTERIUM TUBERCULOSIS EMBR IN COMPLEX WITH LOW AFFINITY PHOSHOPEPTIDE                                                                                           | TRANSCRIPTION                          |
| 2FF6 | CRYSTAL STRUCTURE OF GELSOLIN DOMAIN 1:CIBOULOT DOMAIN 2 HYBRID IN COMPLEX WITH ACTIN                                                                                | STRUCTURAL PROTEIN/CONTRACTILE PROTEIN |
| 2FFD | FIBRINOGEN FRAGMENT D WITH "A" KNOB PEPTIDE MIMIC GPRVVE                                                                                                             | BLOOD CLOTTING                         |
| 2FFF | OPEN FORM OF A CLASS A TRANSPEPTIDASE DOMAIN                                                                                                                         | MEMBRANE PROTEIN, TRANSFERASE          |
| 2FFK | SOLUTION STRUCTURE OF THE COMPLEX BETWEEN POXVIRUS-ENCODED CC CHEMOKINE INHIBITOR VCCI AND HUMAN MIP-1BETA, MINIMIZED AVERAGE STRUCTURE                              | VIRUS/VIRAL PROTEIN/CYTOKINE           |
| 2FFU | CRYSTAL STRUCTURE OF HUMAN PPGALNACT-2 COMPLEXED WITH UDP AND EA2                                                                                                    | TRANSFERASE                            |
| 2FGE | CRYSTAL STRUCTURE OF PRESEQUENCE PROTEASE PREP FROM ARABIDOPSIS THALIANA                                                                                             | HYDROLASE, PLANT PROTEIN               |
| 2FGW | X-RAY STRUCTURES OF FRAGMENTS FROM BINDING AND NONBINDING VERSIONS OF A HUMANIZED ANTI-CD18 ANTIBODY: STRUCTURAL INDICATIONS OF THE KEY ROLE OF VH RESIDUES 59 TO 65 | IMMUNOGLOBULIN                         |
| 2FH5 | THE STRUCTURE OF THE MAMMALIAN SRP RECEPTOR                                                                                                                          | TRANSPORT PROTEIN                      |
| 2FHE | FASCIOLA HEPATICA GLUTATHIONE S-TRANSFERASE ISOFORM 1 IN COMPLEX WITH GLUTATHIONE                                                                                    | TRANSFERASE                            |
| 2FHG | CRYSTAL STRUCTURE OF MYCOBACTERIAL TUBERCULOSIS PROTEASOME                                                                                                           | HYDROLASE                              |
| 2FHH | CRYSTAL STRUCTURE OF MYCOBACTERIUM TUBERCULOSIS PROTEASOME IN COMPLEX WITH A PEPTIDYL BORONATE INHIBITOR MLN-273                                                     | HYDROLASE                              |
| 2FHJ | CRYSTAL STRUCTURE OF FORMYLMETHANOFURAN: TETRAHYDROMETHANOPTERIN FORMYLTRANSFERASE IN COMPLEX WITH ITS COENZYMES                                                     | TRANSFERASE                            |
| 2FHS | STRUCTURE OF ACYL CARRIER PROTEIN BOUND TO FABI, THE ENOYL REDUCTASE FROM ESCHERICHIA COLI                                                                           | OXIDOREDUCTASE/BIOSYNTHETIC PROTEIN    |
| 2FHX | PSEUDOMONAS AERUGINOSA SPM-1 METALLO-BETA-LACTAMASE                                                                                                                  | HYDROLASE, METAL BINDING PROTEIN       |
| 2FHZ | MOLECULAR BASIS OF INHIBITION OF THE RIBONUCLEASE ACTIVITY IN COLICIN E5 BY ITS COGNATE IMMUNITY PROTEIN                                                             | IMMUNE SYSTEM, HYDROLASE               |
| 2FIB | RECOMBINANT HUMAN GAMMA-FIBRINOGEN CARBOXYL TERMINAL FRAGMENT (RESIDUES 143-411) COMPLEXED TO THE PEPTIDE GLY-PRO-ARG-PRO AT PH 6.0                                  | COMPLEX (BLOOD COAGULATION/PEPTIDE)    |

|      |                                                                                                                                       |                                       |
|------|---------------------------------------------------------------------------------------------------------------------------------------|---------------------------------------|
| 2FID | CRYSTAL STRUCTURE OF A BOVINE RABEX-5 FRAGMENT COMPLEXED WITH UBIQUITIN                                                               | PROTEIN TURNOVER/ENDOCYTOSIS          |
| 2FIF | CRYSTAL STRUCTURE OF A BOVINE RABEX-5 FRAGMENT COMPLEXED WITH UBIQUITIN                                                               | PROTEIN TURNOVER/ENDOCYTOSIS          |
| 2FIR | CRYSTAL STRUCTURE OF DFPR-VIIA/STF                                                                                                    | BLOOD CLOTTING                        |
| 2FIV | CRYSTAL STRUCTURE OF FELINE IMMUNODEFICIENCY VIRUS PROTEASE COMPLEXED WITH A SUBSTRATE                                                | COMPLEX (ACID PROTEINASE/SUBSTRATE)   |
| 2FJ7 | CRYSTAL STRUCTURE OF NUCLEOSOME CORE PARTICLE CONTAINING A POLY (DA.DT) SEQUENCE ELEMENT                                              | STRUCTURAL PROTEIN/DNA                |
| 2FJA | ADENOSINE 5'-PHOSPHOSULFATE REDUCTASE IN COMPLEX WITH SUBSTRATE                                                                       | OXIDOREDUCTASE                        |
| 2FJB | ADENOSINE-5'-PHOSPHOSULFATE REDUCTASE IM COMPLEX WITH PRODUCTS                                                                        | OXIDOREDUCTASE                        |
| 2FJD | ADENOSINE-5'-PHOSPHOSULFATE REDUCTASE IN COMPLEX WITH SULFITE (COVALENT ADDUCT)                                                       | OXIDOREDUCTASE                        |
| 2FJE | ADENOSINE-5'-PHOSPHOSULFATE REDUCTASE OXIDIZED STATE                                                                                  | OXIDOREDUCTASE                        |
| 2FJF | STRUCTURE OF THE G6 FAB, A PHAGE DERIVED VEGF BINDING FAB                                                                             | IMMUNE SYSTEM                         |
| 2FJG | STRUCTURE OF THE G6 FAB, A PHAGE DERIVED FAB FRAGMENT, IN COMPLEX WITH VEGF                                                           | HORMONE/GROWTH FACTOR/IMMUNE SYSTEM   |
| 2FJH | STRUCTURE OF THE B20-4 FAB, A PHAGE DERIVED FAB FRAGMENT, IN COMPLEX WITH VEGF                                                        | HORMONE/GROWTH FACTOR/IMMUNE SYSTEM   |
| 2FJU | ACTIVATED RAC1 BOUND TO ITS EFFECTOR PHOSPHOLIPASE C BETA 2                                                                           | SIGNALING PROTEIN,APOPTOSIS/HYDROLASE |
| 2FK0 | CRYSTAL STRUCTURE OF A H5N1 INFLUENZA VIRUS HEMAGGLUTININ.                                                                            | VIRUS/VIRAL PROTEIN                   |
| 2FKA | CRYSTAL STRUCTURE OF MG(2+) AND BEF(3)(-)-BOUND CHEY IN COMPLEX WITH CHEZ(200-214) SOLVED FROM A F432 CRYSTAL GROWN IN CAPS (PH 10.5) | SIGNALING PROTEIN                     |
| 2FKW | STRUCTURE OF LH2 FROM RPS. ACIDOPHILA CRYSTALLIZED IN LIPIDIC MESOPHASES                                                              | MEMBRANE PROTEIN, PHOTOSYNTHESIS      |
| 2FL5 | COFACTOR-CONTAINING ANTIBODIES: CRYSTAL STRUCTURE OF THE ORIGINAL YELLOW ANTIBODY                                                     | IMMUNE SYSTEM                         |
| 2FLB | DISCOVERY OF A NOVEL HYDROXY PYRAZOLE BASED FACTOR IXA INHIBITOR                                                                      | HYDROLASE/BLOOD CLOTTING              |
| 2FLK | CRYSTAL STRUCTURE OF CHEY IN COMPLEX WITH CHEZ(200-214) SOLVED FROM A F432 CRYSTAL GROWN IN CAPS (PH 10.5)                            | SIGNALING PROTEIN                     |
| 2FLR | NOVEL 5-AZAINDOLE FACTOR VIIA INHIBITORS                                                                                              | HYDROLASE/BLOOD CLOTTING              |
| 2FLW | CRYSTAL STRUCTURE OF MG2+ AND BEF3- OUND CHEY IN COMPLEX WITH CHEZ 200-214 SOLVED FROM A F432 CRYSTAL GROWN IN HEPES (PH 7.5)         | SIGNALING PROTEIN                     |
| 2FM2 | HCV NS3-4A PROTEASE DOMAIN COMPLEXED WITH A KETOAMIDE INHIBITOR, SCH446211                                                            | HYDROLASE                             |
| 2FM8 | CRYSTAL STRUCTURE OF THE SALMONELLA SECRETION CHAPERONE INVB IN COMPLEX WITH SIPA                                                     | CHAPERONE/CELL INVASION               |

|      |                                                                                                                                                                            |                                       |
|------|----------------------------------------------------------------------------------------------------------------------------------------------------------------------------|---------------------------------------|
| 2FMF | CRYSTAL STRUCTURE OF CHEY IN COMPLEX WITH CHEZ 200-214 SOLVED FROM A F432 CRYSTAL GROWN IN HEPES (PH 7.5)                                                                  | SIGNALING PROTEIN                     |
| 2FMH | CRYSTAL STRUCTURE OF MG2+ AND BEF3- BOUND CHEY IN COMPLEX WITH CHEZ 200-214 SOLVED FROM A F432 CRYSTAL GROWN IN TRIS (PH 8.4)                                              | SIGNALING PROTEIN                     |
| 2FMI | CRYSTAL STRUCTURE OF CHEY IN COMPLEX WITH CHEZ 200-214 SOLVED FROM A F432 CRYSTAL GROWN IN TRIS (PH 8.4)                                                                   | SIGNALING PROTEIN                     |
| 2FMK | CRYSTAL STRUCTURE OF MG2+ AND BEF3- BOUND CHEY IN COMPLEX WITH CHEZ 200-214 SOLVED FROM A P2(1)2(1)2 CRYSTAL GROWN IN MES (PH 6.0)                                         | SIGNALING PROTEIN                     |
| 2FMM | CRYSTAL STRUCTURE OF EMSY-HP1 COMPLEX                                                                                                                                      | TRANSCRIPTION                         |
| 2FNJ | CRYSTAL STRUCTURE OF A B30.2/SPRY DOMAIN-CONTAINING PROTEIN GUSTAVUS IN COMPLEX WITH ELONGIN B AND ELONGIN C                                                               | PROTEIN TRANSPORT/SIGNALING PROTEIN   |
| 2FNS | CRYSTAL STRUCTURE OF WILD-TYPE INACTIVE (D25N) HIV-1 PROTEASE COMPLEXED WITH WILD-TYPE HIV-1 NC-P1 SUBSTRATE.                                                              | HYDROLASE                             |
| 2FNT | CRYSTAL STRUCTURE OF A DRUG-RESISTANT (V82A) INACTIVE (D25N) HIV-1 PROTEASE COMPLEXED WITH AP2V VARIANT OF HIV-1 NC-P1 SUBSTRATE.                                          | HYDROLASE                             |
| 2FNX | DESIGN OF SPECIFIC PEPTIDE INHIBITORS OF PHOSPHOLIPASE A2 (PLA2): CRYSTAL STRUCTURE OF THE COMPLEX OF PLA2 WITH A HIGHLY POTENT PEPTIDE VAL-ILE-ALA-LYS AT 2.7A RESOLUTION | HYDROLASE                             |
| 2FO1 | CRYSTAL STRUCTURE OF THE CSL-NOTCH-MASTERMIND TERNARY COMPLEX BOUND TO DNA                                                                                                 | GENE REGULATION/SIGNALING PROTEIN/DNA |
| 2FO4 | ENHANCED MHC CLASS I BINDING AND IMMUNE RESPONSES THROUGH ANCHOR MODIFICATION OF THE NON-CANONICAL TUMOR ASSOCIATED MUC1-8 PEPTIDE                                         | IMMUNE SYSTEM                         |
| 2FO5 | CRYSTAL STRUCTURE OF RECOMBINANT BARLEY CYSTEINE ENDOPROTEASE B ISOFORM 2 (EP-B2) IN COMPLEX WITH LEUPEPTIN                                                                | HYDROLASE                             |
| 2FOI | SYNTHESIS, BIOLOGICAL ACTIVITY, AND X-RAY CRYSTAL STRUCTURAL ANALYSIS OF DIARYL ETHER INHIBITORS OF MALARIAL ENOYL ACP REDUCTASE.                                          | OXIDOREDUCTASE                        |
| 2FOM | DENGUE VIRUS NS2B/NS3 PROTEASE                                                                                                                                             | VIRAL PROTEIN/PROTEASE                |
| 2FOT | CRYSTAL STRUCTURE OF THE COMPLEX BETWEEN CALMODULIN AND ALPHAII-SPECTRIN                                                                                                   | METAL BINDING, STRUCTURAL PROTEIN     |
| 2FP4 | CRYSTAL STRUCTURE OF PIG GTP-SPECIFIC SUCCINYL-COA SYNTHETASE IN COMPLEX WITH GTP                                                                                          | LIGASE                                |
| 2FP7 | WEST NILE VIRUS NS2B/NS3PROTEASE IN COMPLEX WITH BZ-NLE-LYS-ARG-ARG-H                                                                                                      | VIRAL PROTEIN/PROTEASE                |
| 2FPG | CRYSTAL STRUCTURE OF PIG GTP-SPECIFIC SUCCINYL-COA SYNTHETASE IN COMPLEX WITH GDP                                                                                          | LIGASE                                |
| 2FPI | CRYSTAL STRUCTURE OF PIG GTP-SPECIFIC SUCCINYL-COA SYNTHETASE FROM POLYETHYLENE GLYCOL                                                                                     | LIGASE                                |
| 2FPP | CRYSTAL STRUCTURE OF PIG GTP-SPECIFIC SUCCINYL-COA SYNTHETASE FROM POLYETHYLENE GLYCOL WITH CHLORIDE IONS                                                                  | LIGASE                                |



|      |                                                                                                                                                                                                          |                                     |
|------|----------------------------------------------------------------------------------------------------------------------------------------------------------------------------------------------------------|-------------------------------------|
| 2FQQ | CRYSTAL STRUCTURE OF HUMAN CASPASE-1 (CYS285->ALA, CYS362->ALA, CYS364->ALA, CYS397->ALA) IN COMPLEX WITH 1-METHYL-3-TRIFLUOROMETHYL-1H-THIENO[2,3-C]PYRAZOLE-5-CARBOXYLIC ACID (2-MERCAPTO-ETHYL)-AMIDE | HYDROLASE                           |
| 2FR4 | STRUCTURE OF FAB DNA-1 COMPLEXED WITH A STEM-LOOP DNA LIGAND                                                                                                                                             | IMMUNE SYSTEM/DNA                   |
| 2FR8 | STRUCTURE OF TRANSHYDROGENASE (DI.R127A.NAD+) <sub>2</sub> (DIII.NADP+) <sub>1</sub> ASYMMETRIC COMPLEX                                                                                                  | OXIDOREDUCTASE                      |
| 2FRD | STRUCTURE OF TRANSHYDROGENASE (DI.S138A.NADH) <sub>2</sub> (DIII.NADPH) <sub>1</sub> ASYMMETRIC COMPLEX                                                                                                  | OXIDOREDUCTASE                      |
| 2FRV | CRYSTAL STRUCTURE OF THE OXIDIZED FORM OF NI-FE HYDROGENASE                                                                                                                                              | OXIDOREDUCTASE                      |
| 2FSA | CRYSTAL STRUCTURE OF PHD FINGER-LINKER-BROMODOMAIN FRAGMENT OF HUMAN BPTF IN THE H3(1-15)K4ME2 BOUND STATE                                                                                               | TRANSCRIPTION                       |
| 2FSE | CRYSTALLOGRAPHIC STRUCTURE OF A RHEUMATOID ARTHRITIS MHC SUSCEPTIBILITY ALLELE, HLA-DR1 (DRB1*0101), COMPLEXED WITH THE IMMUNODOMINANT DETERMINANT OF HUMAN TYPE II COLLAGEN                             | IMMUNE SYSTEM, STRUCTURAL PROTEIN   |
| 2FSV | STRUCTURE OF TRANSHYDROGENASE (DI.D135N.NAD+) <sub>2</sub> (DIII.E155W.NADP+) <sub>1</sub> ASYMMETRIC COMPLEX                                                                                            | OXIDOREDUCTASE                      |
| 2FTK | BERYLLOFLOURIDE SPO0F COMPLEX WITH SPO0B                                                                                                                                                                 | TRANSFERASE                         |
| 2FTS | CRYSTAL STRUCTURE OF THE GLYCINE RECEPTOR-GEPHYRIN COMPLEX                                                                                                                                               | STRUCTURAL PROTEIN                  |
| 2FTX | CRYSTAL STRUCTURE OF THE YEAST KINETOCHORE SPC24/SPC25 GLOBULAR DOMAIN                                                                                                                                   | STRUCTURAL PROTEIN, PROTEIN BINDING |
| 2FU5 | STRUCTURE OF RAB8 IN COMPLEX WITH MSS4                                                                                                                                                                   | SIGNALING PROTEIN                   |
| 2FUG | CRYSTAL STRUCTURE OF THE HYDROPHILIC DOMAIN OF RESPIRATORY COMPLEX I FROM THERMUS THERMOPHILUS                                                                                                           | OXIDOREDUCTASE                      |
| 2FUN | ALTERNATIVE P35-CASPASE-8 COMPLEX                                                                                                                                                                        | APOPTOSIS/HYDROLASE                 |
| 2FVJ | A NOVEL ANTI-ADIPOGENIC PARTIAL AGONIST OF PEROXISOME PROLIFERATOR-ACTIVATED RECEPTOR-GAMMA (PPARG) RECRUITS PPARG-COACTIVATOR-1 ALPHA (PGC1A) BUT POTENTIATES INSULIN SIGNALING IN VITRO                | SIGNALING PROTEIN                   |
| 2FWO | MHC CLASS I H-2KD HEAVY CHAIN IN COMPLEX WITH BETA-2MICROGLOBULIN AND PEPTIDE DERIVED FROM INFLUENZA NUCLEOPROTEIN                                                                                       | IMMUNE SYSTEM/VIRAL PROTEIN         |
| 2FX7 | CRYSTAL STRUCTURE OF HIV-1 NEUTRALIZING HUMAN FAB 4E10 IN COMPLEX WITH A 16-RESIDUE PEPTIDE ENCOMPASSING THE 4E10 EPITOPE ON GP41                                                                        | IMMUNE SYSTEM                       |
| 2FX8 | CRYSTAL STRUCTURE OF HIV-1 NEUTRALIZING HUMAN FAB 4E10 IN COMPLEX WITH AN AIB-INDUCED PEPTIDE ENCOMPASSING THE 4E10 EPITOPE ON GP41                                                                      | IMMUNE SYSTEM                       |
| 2FX9 | CRYSTAL STRUCTURE OF HIV-1 NEUTRALIZING HUMAN FAB 4E10 IN COMPLEX WITH A THIOETHER-LINKED PEPTIDE ENCOMPASSING THE 4E10 EPITOPE ON GP41                                                                  | IMMUNE SYSTEM                       |
| 2FYC | CRYSTAL STRUCTURE OF THE CATALYTIC DOMAIN OF BOVINE BETA1,4-GALACTOSYLTRANSFERASE-I IN COMPLEX WITH ALPHA-LACTALBUMIN, CA AND UDP-GALACTOSE                                                              | TRANSFERASE                         |
| 2FYD | CATALYTIC DOMAIN OF BOVINE BETA 1, 4-GALACTOSYLTRANSFERASE                                                                                                                                               | TRANSFERASE                         |

|      |                                                                                                                                                                                                              |                        |
|------|--------------------------------------------------------------------------------------------------------------------------------------------------------------------------------------------------------------|------------------------|
|      | IN COMPLEX WITH ALPHA-LACTALBUMIN, GLUCOSE, MN, AND UDP-N-ACETYLGALACTOSAMINE                                                                                                                                |                        |
| 2FYL | HADDOCK MODEL OF THE COMPLEX BETWEEN DOUBLE MODULE OF LRP, CR56, AND FIRST DOMAIN OF RECEPTOR ASSOCIATED PROTEIN, RAP-D1.                                                                                    | SURFACE ACTIVE PROTEIN |
| 2FYM | CRYSTAL STRUCTURE OF E. COLI ENOLASE COMPLEXED WITH THE MINIMAL BINDING SEGMENT OF RNASE E.                                                                                                                  | LYASE                  |
| 2FYN | CRYSTAL STRUCTURE ANALYSIS OF THE DOUBLE MUTANT RHODOBACTER SPHAEROIDES BC1 COMPLEX                                                                                                                          | OXIDOREDUCTASE         |
| 2FYS | CRYSTAL STRUCTURE OF ERK2 COMPLEX WITH KIM PEPTIDE DERIVED FROM MKP3                                                                                                                                         | TRANSFERASE            |
| 2FYU | CRYSTAL STRUCTURE OF BOVINE HEART MITOCHONDRIAL BC1 WITH JG144 INHIBITOR                                                                                                                                     | OXIDOREDUCTASE         |
| 2FYY | THE ROLE OF T CELL RECEPTOR ALPHA GENES IN DIRECTING HUMAN MHC RESTRICTION                                                                                                                                   | IMMUNE SYSTEM          |
| 2FYZ | STRUCTURAL OF MUMPS VIRUS FUSION PROTEIN CORE                                                                                                                                                                | PROTEIN BINDING        |
| 2FZ3 | THE ROLE OF T CELL RECEPTOR ALPHA GENES IN DIRECTING HUMAN MHC RESTRICTION                                                                                                                                   | IMMUNE SYSTEM          |
| 2FZC | THE STRUCTURE OF WILD-TYPE E. COLI ASPARTATE TRANSCARBAMOYLASE IN COMPLEX WITH NOVEL T STATE INHIBITORS AT 2.10 RESOLUTION                                                                                   | TRANSFERASE            |
| 2FZG | THE STRUCTURE OF WILD-TYPE E. COLI ASPARTATE TRANSCARBAMOYLASE IN COMPLEX WITH NOVEL T STATE INHIBITORS AT 2.25 RESOLUTION                                                                                   | TRANSFERASE            |
| 2FZK | THE STRUCTURE OF WILD-TYPE E. COLI ASPARTATE TRANSCARBAMOYLASE IN COMPLEX WITH NOVEL T STATE INHIBITORS AT 2.50 RESOLUTION                                                                                   | TRANSFERASE            |
| 2FZZ | FACTOR XA IN COMPLEX WITH THE INHIBITOR 1-(3-AMINO-1,2-BENZISOXAZOL-5-YL)-6-(2'-(((3R)-3-HYDROXY-1-PYRROLIDINYL)METHYL)-4-BIPHENYLYL)-3-(TRIFLUOROMETHYL)-1,4,5,6-TETRAHYDRO-7H-PYRAZOLO[3,4-C]PYRIDIN-7-ONE | HYDROLASE              |
| 2G00 | FACTOR XA IN COMPLEX WITH THE INHIBITOR 3-(6-(2'-((DIMETHYLAMINO)METHYL)-4-BIPHENYLYL)-7-OXO-3-(TRIFLUOROMETHYL)-4,5,6,7-TETRAHYDRO-1H-PYRAZOLO[3,4-C]PYRIDIN-1-YL)BENZAMIDE                                 | HYDROLASE              |
| 2G16 | STRUCTURE OF S65A Y66S GFP VARIANT AFTER BACKBONE FRAGMENTATION                                                                                                                                              | LUMINESCENT PROTEIN    |
| 2G1T | A SRC-LIKE INACTIVE CONFORMATION IN THE ABL TYROSINE KINASE DOMAIN                                                                                                                                           | TRANSFERASE            |
| 2G2F | A SRC-LIKE INACTIVE CONFORMATION IN THE ABL TYROSINE KINASE DOMAIN                                                                                                                                           | TRANSFERASE            |
| 2G2I | A SRC-LIKE INACTIVE CONFORMATION IN THE ABL TYROSINE KINASE DOMAIN                                                                                                                                           | TRANSFERASE            |
| 2G2L | CRYSTAL STRUCTURE OF THE SECOND PDZ DOMAIN OF SAP97 IN COMPLEX WITH A GLUR-A C-TERMINAL PEPTIDE                                                                                                              | MEMBRANE PROTEIN       |
| 2G2R | GREEN-FLUORESCENT ANTIBODY 11G10 IN COMPLEX WITH ITS HAPTEN                                                                                                                                                  | IMMUNE SYSTEM          |

(NITRO-STILBENE DERIVATIVE)

|      |                                                                                                                                                     |                                       |
|------|-----------------------------------------------------------------------------------------------------------------------------------------------------|---------------------------------------|
| 2G2S | STRUCTURE OF S65G Y66S GFP VARIANT AFTER SPONTANEOUS PEPTIDE HYDROLYSIS                                                                             | LUMINESCENT PROTEIN                   |
| 2G2U | CRYSTAL STRUCTURE OF THE SHV-1 BETA-LACTAMASE/BETA-LACTAMASE INHIBITOR PROTEIN (BLIP) COMPLEX                                                       | HYDROLASE/HYDROLASE INHIBITOR         |
| 2G2W | CRYSTAL STRUCTURE OF THE SHV D104K BETA-LACTAMASE/BETA-LACTAMASE INHIBITOR PROTEIN (BLIP) COMPLEX                                                   | HYDROLASE/HYDROLASE INHIBITOR         |
| 2G30 | BETA APPENDAGE OF AP2 COMPLEXED WITH ARH PEPTIDE                                                                                                    | ENDOCYTOSIS/EXOCYTOSIS                |
| 2G38 | A PE/PPE PROTEIN COMPLEX FROM MYCOBACTERIUM TUBERCULOSIS                                                                                            | STRUCTURAL GENOMICS, UNKNOWN FUNCTION |
| 2G3D | STRUCTURE OF S65G Y66A GFP VARIANT AFTER SPONTANEOUS PEPTIDE HYDROLYSIS                                                                             | LUMINESCENT PROTEIN                   |
| 2G3V | CRYSTAL STRUCTURE OF CAGS (HP0534, CAG13) FROM HELICOBACTER PYLORI                                                                                  | UNKNOWN FUNCTION                      |
| 2G44 | HUMAN ESTROGEN RECEPTOR ALPHA LIGAND-BINDING DOMAIN IN COMPLEX WITH OBCP-1M-G AND A GLUCOCORTICOID RECEPTOR INTERACTING PROTEIN 1 NR BOX II PEPTIDE | HORMONE/GROWTH FACTOR RECEPTOR        |
| 2G45 | CO-CRYSTAL STRUCTURE OF ZNF UBP DOMAIN FROM THE DEUBIQUITINATING ENZYME ISOPEPTIDASE T (ISOT) IN COMPLEX WITH UBIQUITIN                             | HYDROLASE                             |
| 2G47 | CRYSTAL STRUCTURE OF HUMAN INSULIN-DEGRADING ENZYME IN COMPLEX WITH AMYLOID-BETA (1-40)                                                             | HYDROLASE                             |
| 2G48 | CRYSTAL STRUCTURE OF HUMAN INSULIN-DEGRADING ENZYME IN COMPLEX WITH AMYLIN                                                                          | HYDROLASE                             |
| 2G49 | CRYSTAL STRUCTURE OF HUMAN INSULIN-DEGRADING ENZYME IN COMPLEX WITH GLUCAGON                                                                        | HYDROLASE                             |
| 2G4D | CRYSTAL STRUCTURE OF HUMAN SENP1 MUTANT (C603S) IN COMPLEX WITH SUMO-1                                                                              | HYDROLASE/PROTEIN BINDING             |
| 2G4M | INSULIN COLLECTED AT 2.0 A WAVELENGTH                                                                                                               | HORMONE/GROWTH FACTOR                 |
| 2G54 | CRYSTAL STRUCTURE OF ZN-BOUND HUMAN INSULIN-DEGRADING ENZYME IN COMPLEX WITH INSULIN B CHAIN                                                        | HYDROLASE                             |
| 2G56 | CRYSTAL STRUCTURE OF HUMAN INSULIN-DEGRADING ENZYME IN COMPLEX WITH INSULIN B CHAIN                                                                 | HYDROLASE                             |
| 2G58 | CRYSTAL STRUCTURE OF A COMPLEX OF PHOSPHOLIPASE A2 WITH A DESIGNED PEPTIDE INHIBITOR DEHYDRO-ILE-ALA-ARG-SER AT 0.98 A RESOLUTION                   | HYDROLASE                             |
| 2G5B | CRYSTAL STRUCTURE OF THE ANTI-BAX MONOCLONAL ANTIBODY 6A7 AND A BAX PEPTIDE.                                                                        | APOPTOSIS                             |
| 2G5H | STRUCTURE OF TRNA-DEPENDENT AMIDOTRANSFERASE GATCAB                                                                                                 | LIGASE                                |
| 2G5I | STRUCTURE OF TRNA-DEPENDENT AMIDOTRANSFERASE GATCAB COMPLEXED WITH ADP-ALF4                                                                         | LIGASE                                |
| 2G5L | STREPTAVIDIN IN COMPLEX WITH NANOTAG                                                                                                                | PEPTIDE BINDING PROTEIN               |
| 2G5O | HUMAN ESTROGEN RECEPTOR ALPHA LIGAND-BINDING DOMAIN IN COMPLEX WITH 2-(BUT-1-ENYL)-17BETA-ESTRADIOL AND A                                           | HORMONE/GROWTH FACTOR RECEPTOR        |

|      |                                                                                                                                                                                                                                         |                                       |
|------|-----------------------------------------------------------------------------------------------------------------------------------------------------------------------------------------------------------------------------------------|---------------------------------------|
|      | GLUCOCORTICOID RECEPTOR INTERACTING PROTEIN 1 NR BOX II PEPTIDE                                                                                                                                                                         |                                       |
| 2G5Z | STRUCTURE OF S65G Y66S GFP VARIANT AFTER SPONTANEOUS PEPTIDE HYDROLYSIS AND DECARBOXYLATION                                                                                                                                             | LUMINESCENT PROTEIN                   |
| 2G60 | STRUCTURE OF ANTI-FLAG M2 FAB DOMAIN                                                                                                                                                                                                    | IMMUNE SYSTEM                         |
| 2G75 | CRYSTAL STRUCTURE OF ANTI-SARS M396 ANTIBODY                                                                                                                                                                                            | IMMUNE SYSTEM                         |
| 2G77 | CRYSTAL STRUCTURE OF GYP1 TBC DOMAIN IN COMPLEX WITH RAB33 GTPASE BOUND TO GDP AND ALF3                                                                                                                                                 | HYDROLASE ACTIVATOR/PROTEIN TRANSPORT |
| 2G81 | CRYSTAL STRUCTURE OF THE BOWMAN-BIRK INHIBITOR FROM VIGNA UNGUICULATA SEEDS IN COMPLEX WITH BETA-TRYPSIN AT 1.55 ANGSTROMS RESOLUTION                                                                                                   | HYDROLASE/HYDROLASE INHIBITOR         |
| 2G83 | STRUCTURE OF ACTIVATED G-ALPHA-11 BOUND TO A NUCLEOTIDE-STATE-SELECTIVE PEPTIDE: MINIMAL DETERMINANTS FOR RECOGNIZING THE ACTIVE FORM OF A G PROTEIN ALPHA SUBUNIT                                                                      | SIGNALING PROTEIN                     |
| 2G9H | CRYSTAL STRUCTURE OF STAPHYLOCOCCAL ENTEROTOXIN I (SEI) IN COMPLEX WITH A HUMAN MHC CLASS II MOLECULE                                                                                                                                   | IMMUNE SYSTEM                         |
| 2G9X | STRUCTURE OF THR 160 PHOSPHORYLATED CDK2/CYCLIN A IN COMPLEX WITH THE INHIBITOR NU6271                                                                                                                                                  | TRANSFERASE/CELL CYCLE                |
| 2GA4 | STX2 WITH ADENINE                                                                                                                                                                                                                       | TOXIN                                 |
| 2GA9 | CRYSTAL STRUCTURE OF THE HETERODIMERIC VACCINIA VIRUS POLYADENYLATE POLYMERASE WITH BOUND ATP-GAMMA-S                                                                                                                                   | TRANSFERASE                           |
| 2GAC | T152C MUTANT GLYCOSYLSPARAGINASE FROM FLAVOBACTERIUM MENINGOSEPTICUM                                                                                                                                                                    | HYDROLASE                             |
| 2GAF | CRYSTAL STRUCTURE OF THE VACCINIA POLYADENYLATE POLYMERASE HETERODIMER (APO FORM)                                                                                                                                                       | TRANSFERASE                           |
| 2GAG | HETEROTETRAMERIC SARCOSINE: STRUCTURE OF A DIFLAVIN METALLOENZYME AT 1.85 A RESOLUTION                                                                                                                                                  | OXIDOREDUCTASE                        |
| 2GAH | HETEROTETRAMERIC SARCOSINE: STRUCTURE OF A DIFLAVIN METALLOENZYME AT 1.85 A RESOLUTION                                                                                                                                                  | OXIDOREDUCTASE                        |
| 2GAW | WILD TYPE GLYCOSYLSPARAGINASE FROM FLAVOBACTERIUM MENINGOSEPTICUM                                                                                                                                                                       | HYDROLASE                             |
| 2GBL | CRYSTAL STRUCTURE OF FULL LENGTH CIRCADIAN CLOCK PROTEIN KAIC WITH PHOSPHORYLATION SITES                                                                                                                                                | CIRCADIAN CLOCK PROTEIN, TRANSFERASE  |
| 2GBW | CRYSTAL STRUCTURE OF BIPHENYL 2,3-DIOXYGENASE FROM SPHINGOMONAS YANOIKUYAE B1                                                                                                                                                           | OXIDOREDUCTASE                        |
| 2GBX | CRYSTAL STRUCTURE OF BIPHENYL 2,3-DIOXYGENASE FROM SPHINGOMONAS YANOIKUYAE B1 BOUND TO BIPHENYL                                                                                                                                         | OXIDOREDUCTASE                        |
| 2GC4 | STRUCTURAL COMPARISON OF THE OXIDIZED TERNARY ELECTRON TRANSFER COMPLEX OF METHYLAMINE DEHYDROGENASE, AMICYANIN AND CYTOCHROME C551I FROM PARACOCCUS DENITRIFICANS WITH THE SUBSTRATE-REDUCED, COPPER FREE COMPLEX AT 1.9 A RESOLUTION. | OXIDOREDUCTASE, ELECTRON TRANSPORT    |
| 2GC7 | SUBSTRATE REDUCED, COPPER FREE COMPLEX OF METHYLAMINE DEHYDROGENASE, AMICYANIN AND CYTOCHROME C551I FROM PARACOCCUS DENITRIFICANS.                                                                                                      | OXIDOREDUCTASE, ELECTRON TRANSPORT    |

|      |                                                                                                                               |                                   |
|------|-------------------------------------------------------------------------------------------------------------------------------|-----------------------------------|
| 2GCH | REFINED CRYSTAL STRUCTURE OF GAMMA-CHYMOTRYPSIN AT 1.9 ANGSTROMS RESOLUTION                                                   | HYDROLASE (SERINE PROTEINASE)     |
| 2GCO | CRYSTAL STRUCTURE OF THE HUMAN RHOC-GPPNHP COMPLEX                                                                            | SIGNALING PROTEIN                 |
| 2GCY | HUMANIZED ANTIBODY C25 FAB FRAGMENT                                                                                           | IMMUNE SYSTEM                     |
| 2GD4 | CRYSTAL STRUCTURE OF THE ANTITHROMBIN-S195A FACTOR XA-PENTASACCHARIDE COMPLEX                                                 | HYDROLASE                         |
| 2GDE | THROMBIN IN COMPLEX WITH INHIBITOR                                                                                            | BLOOD CLOTTING                    |
| 2GEZ | CRYSTAL STRUCTURE OF POTASSIUM-INDEPENDENT PLANT ASPARAGINASE                                                                 | HYDROLASE                         |
| 2GFB | CRYSTAL STRUCTURE OF A CATALYTIC FAB HAVING ESTERASE-LIKE ACTIVITY                                                            | IMMUNOGLOBULIN                    |
| 2GFC | CAMP-DEPENDENT PROTEIN KINASE PKA CATALYTIC SUBUNIT WITH PKI-5-24                                                             | TRANSFERASE                       |
| 2GGM | HUMAN CENTRIN 2 XERODERMA PIGMENTOSUM GROUP C PROTEIN COMPLEX                                                                 | CELL CYCLE                        |
| 2GGV | CRYSTAL STRUCTURE OF THE WEST NILE VIRUS NS2B-NS3 PROTEASE, HIS51ALA MUTANT                                                   | HYDROLASE                         |
| 2GH0 | GROWTH FACTOR/RECEPTOR COMPLEX                                                                                                | HORMONE/GROWTH FACTOR             |
| 2GHO | ECOMBINANT THERMUS AQUATICUS RNA POLYMERASE FOR STRUCTURAL STUDIES                                                            | TRANSFERASE                       |
| 2GHQ | CTD-SPECIFIC PHOSPHATASE SCP1 IN COMPLEX WITH PEPTIDE C-TERMINAL DOMAIN OF RNA POLYMERASE II                                  | HYDROLASE                         |
| 2GHT | CTD-SPECIFIC PHOSPHATASE SCP1 IN COMPLEX WITH PEPTIDE FROM C-TERMINAL DOMAIN OF RNA POLYMERASE II                             | HYDROLASE                         |
| 2GHW | CRYSTAL STRUCTURE OF SARS SPIKE PROTEIN RECEPTOR BINDING DOMAIN IN COMPLEX WITH A NEUTRALIZING ANTIBODY, 80R                  | VIRUS/VIRAL PROTEIN/ANTIBIOTIC    |
| 2GIA | CRYSTAL STRUCTURES OF TRYPANOSOMA BRUCIEI MRP1/MRP2                                                                           | TRANSLATION                       |
| 2GID | CRYSTAL STRUCTURES OF TRYPANOSOMA BRUCIEI MRP1/MRP2                                                                           | TRANSLATION                       |
| 2GIT | HUMAN CLASS I MHC HLA-A2 IN COMPLEX WITH THE MODIFIED HTLV-1 TAX (Y5K-4-[3-INDOLYL]-BUTYRIC ACID) PEPTIDE                     | IMMUNE SYSTEM                     |
| 2GJ6 | THE COMPLEX BETWEEN TCR A6 AND HUMAN CLASS I MHC HLA-A2 WITH THE MODIFIED HTLV-1 TAX (Y5K-4-[3-INDOLYL]-BUTYRIC ACID) PEPTIDE | IMMUNE SYSTEM                     |
| 2GJ7 | CRYSTAL STRUCTURE OF A GE-GI/FC COMPLEX                                                                                       | IMMUNE SYSTEM/VIRUS/VIRAL PROTEIN |
| 2GJE | STRUCTURE OF A GUIDERNA-BINDING PROTEIN COMPLEX BOUND TO A GRNA                                                               | TRANSLATION/RNA                   |
| 2GJX | CRYSTALLOGRAPHIC STRUCTURE OF HUMAN BETA-HEXOSAMINIDASE A                                                                     | HYDROLASE                         |
| 2GJZ | STRUCTURE OF CATALYTIC ELIMINATION ANTIBODY 13G5 FROM A CRYSTAL IN SPACE GROUP P2(1)                                          | IMMUNE SYSTEM                     |
| 2GK0 | STRUCTURE OF CATALYTIC ELIMINATION ANTIBODY 13G5 FROM A TWINNED CRYSTAL IN SPACE GROUP C2                                     | IMMUNE SYSTEM                     |

|      |                                                                                                                                                                                                                |                                   |
|------|----------------------------------------------------------------------------------------------------------------------------------------------------------------------------------------------------------------|-----------------------------------|
| 2GK1 | X-RAY CRYSTAL STRUCTURE OF NGT-BOUND HEXA                                                                                                                                                                      | HYDROLASE                         |
| 2GKV | CRYSTAL STRUCTURE OF THE SGPB:P14'-ALA32 OMTKY3-DEL(1-5) COMPLEX                                                                                                                                               | HYDROLASE/HYDROLASE INHIBITOR     |
| 2GKW | KEY CONTACTS PROMOTE RECOGNITION OF BAFF-R BY TRAF3                                                                                                                                                            | APOPTOSIS                         |
| 2GL7 | CRYSTAL STRUCTURE OF A BETA-CATENIN/BCL9/TCF4 COMPLEX                                                                                                                                                          | TRANSCRIPTION                     |
| 2GL9 | CRYSTAL STRUCTURE OF GLYCOSYLASPARAGINASE-SUBSTRATE COMPLEX                                                                                                                                                    | HYDROLASE                         |
| 2GMI | MMS2/UBC13-UBIQUITIN                                                                                                                                                                                           | LIGASE, HUMAN PROTEIN             |
| 2GMR | PHOTOSYNTHETIC REACTION CENTER MUTANT FROM RHODOBACTER SPHAEROIDES WITH ASP L210 REPLACED WITH ASN                                                                                                             | PHOTOSYNTHESIS                    |
| 2GMX | SELECTIVE AMINOPYRIDINE-BASED C-JUN N-TERMINAL KINASE INHIBITORS WITH CELLULAR ACTIVITY                                                                                                                        | TRANSCRIPTION                     |
| 2GNF | PROTEIN KINASE A FIVEFOLD MUTANT MODEL OF RHO-KINASE WITH Y-27632                                                                                                                                              | TRANSFERASE/TRANSFERASE INHIBITOR |
| 2GNG | PROTEIN KINASE A FIVEFOLD MUTANT MODEL OF RHO-KINASE                                                                                                                                                           | TRANSFERASE/TRANSFERASE INHIBITOR |
| 2GNH | PKA FIVE FOLD MUTANT MODEL OF RHO-KINASE WITH H1152P                                                                                                                                                           | TRANSFERASE/TRANSFERASE INHIBITOR |
| 2GNI | PKA FIVEFOLD MUTANT MODEL OF RHO-KINASE WITH INHIBITOR FASUDIL (HA1077)                                                                                                                                        | TRANSFERASE/TRANSFERASE INHIBITOR |
| 2GNJ | PKA THREE FOLD MUTANT MODEL OF RHO-KINASE WITH Y-27632                                                                                                                                                         | TRANSFERASE/TRANSFERASE INHIBITOR |
| 2GNL | PKA THREEFOLD MUTANT MODEL OF RHO-KINASE WITH INHIBITOR H-1152P                                                                                                                                                | TRANSFERASE/TRANSFERASE INHIBITOR |
| 2GNS | DESIGN OF SPECIFIC PEPTIDE INHIBITORS OF PHOSPHOLIPASE A2: CRYSTAL STRUCTURE OF THE COMPLEX FORMED BETWEEN A GROUP II PHOSPHOLIPASE A2 AND A DESIGNED PENTAPEPTIDE ALA- LEU- VAL- TYR- LYS AT 2.3 Å RESOLUTION | HYDROLASE                         |
| 2GNU | THE CRYSTALLIZATION OF REACTION CENTER FROM RHODOBACTER SPHAEROIDES OCCURS VIA A NEW ROUTE                                                                                                                     | PHOTOSYNTHESIS                    |
| 2GO5 | STRUCTURE OF SIGNAL RECOGNITION PARTICLE RECEPTOR (SR) IN COMPLEX WITH SIGNAL RECOGNITION PARTICLE (SRP) AND RIBOSOME NASCENT CHAIN COMPLEX                                                                    | TRANSLATION/RNA                   |
| 2GOL | XRAY STRUCTURE OF GAG278                                                                                                                                                                                       | VIRUS/VIRAL PROTEIN               |
| 2GOO | TERNARY COMPLEX OF BMP-2 BOUND TO BMPR-IA-ECD AND ACTRII-ECD                                                                                                                                                   | TRANSFERASE                       |
| 2GOX | CRYSTAL STRUCTURE OF EFB-C / C3D COMPLEX                                                                                                                                                                       | CELL ADHESION/TOXIN               |
| 2GP9 | CRYSTAL STRUCTURE OF THE SLOW FORM OF THROMBIN IN A SELF-INHIBITED CONFORMATION                                                                                                                                | HYDROLASE                         |
| 2GPH | DOCKING MOTIF INTERACTIONS IN THE MAP KINASE ERK2                                                                                                                                                              | TRANSFERASE                       |
| 2GPL | TMC-95 BASED BIPHENYL-ETHER MACROCYCLES: SPECIFIC PROTEASOME INHIBITORS                                                                                                                                        | HYDROLASE                         |
| 2GPO | ESTROGEN RELATED RECEPTOR-GAMMA LIGAND BINDING DOMAIN COMPLEXED WITH A SYNTHETIC PEPTIDE FROM RIP140                                                                                                           | TRANSCRIPTION                     |
| 2GPP | ESTROGEN RELATED RECEPTOR-GAMMA LIGAND BINDING DOMAIN                                                                                                                                                          | TRANSCRIPTION                     |

| COMPLEXED WITH A RIP140 PEPTIDE AND SYNTHETIC LIGAND<br>GSK4716 |                                                                                                                  |                                         |
|-----------------------------------------------------------------|------------------------------------------------------------------------------------------------------------------|-----------------------------------------|
| 2GPV                                                            | ESTROGEN RELATED RECEPTOR-GAMMA LIGAND BINDING DOMAIN<br>COMPLEXED WITH 4-HYDROXY-TAMOXIFEN AND A SMRT PEPTIDE   | TRANSCRIPTION                           |
| 2GRL                                                            | CRYSTAL STRUCTURE OF DCT/ICF10 COMPLEX                                                                           | TRANSCRIPTION                           |
| 2GRM                                                            | CRYSTAL STRUCTURE OF PRGX/ICF10 COMPLEX                                                                          | TRANSCRIPTION                           |
| 2GRN                                                            | CRYSTAL STRUCTURE OF HUMAN RANGAP1-UBC9                                                                          | LIGASE                                  |
| 2GRO                                                            | CRYSTAL STRUCTURE OF HUMAN RANGAP1-UBC9-N85Q                                                                     | LIGASE                                  |
| 2GRP                                                            | CRYSTAL STRUCTURE OF HUMAN RANGAP1-UBC9-Y87A                                                                     | LIGASE                                  |
| 2GRQ                                                            | CRYSTAL STRUCTURE OF HUMAN RANGAP1-UBC9-D127A                                                                    | LIGASE                                  |
| 2GRR                                                            | CRYSTAL STRUCTURE OF HUMAN RANGAP1-UBC9-D127S                                                                    | LIGASE                                  |
| 2GRX                                                            | CRYSTAL STRUCTURE OF TONB IN COMPLEX WITH FHUA, E. COLI<br>OUTER MEMBRANE RECEPTOR FOR FERRICHROME               | METAL TRANSPORT                         |
| 2GS6                                                            | CRYSTAL STRUCTURE OF THE ACTIVE EGFR KINASE DOMAIN IN<br>COMPLEX WITH AN ATP ANALOG-PEPTIDE CONJUGATE            | TRANSFERASE                             |
| 2GSI                                                            | CRYSTAL STRUCTURE OF A MURINE FAB IN COMPLEX WITH AN 11<br>RESIDUE PEPTIDE DERIVED FROM STAPHYLOCOCCAL NUCLEASE  | IMMUNE SYSTEM                           |
| 2GSK                                                            | STRUCTURE OF THE BTUB:TONB COMPLEX                                                                               | SIGNALING PROTEIN/MEMBRANE PROTEIN      |
| 2GSM                                                            | CATALYTIC CORE (SUBUNITS I AND II) OF CYTOCHROME C OXIDASE<br>FROM RHODOBACTER SPHAEROIDES                       | OXIDOREDUCTASE                          |
| 2GSR                                                            | STRUCTURE OF PORCINE CLASS PI GLUTATHIONE S-TRANSFERASE                                                          | COMPLEX (TRANSFERASE/INHIBITOR)         |
| 2GT9                                                            | HUMAN CLASS I MHC HLA-A2 IN COMPLEX WITH THE DECAMERIC<br>MELAN-A/MART-1(26-35) PEPTIDE                          | IMMUNE SYSTEM                           |
| 2GTK                                                            | STRUCTURE-BASED DESIGN OF INDOLE PROPIONIC ACIDS AS NOVEL<br>PPARAG CO-AGONISTS                                  | TRANSCRIPTION REGULATOR                 |
| 2GTL                                                            | LUMBRICUS ERYTHROCRUORIN AT 3.5A RESOLUTION                                                                      | OXYGEN STORAGE/TRANSPORT                |
| 2GTP                                                            | CRYSTAL STRUCTURE OF THE HETERODIMERIC COMPLEX OF HUMAN<br>RGS1 AND ACTIVATED GI ALPHA 1                         | SIGNALING PROTEIN                       |
| 2GTW                                                            | HUMAN CLASS I MHC HLA-A2 IN COMPLEX WITH THE NONAMERIC<br>MELAN-A/MART-1(27-35) PEPTIDE HAVING A27L SUBSTITUTION | IMMUNE SYSTEM                           |
| 2GTZ                                                            | HUMAN CLASS I MHC HLA-A2 IN COMPLEX WITH THE NONAMERIC<br>MELAN-A/MART-1(27-35) PEPTIDE HAVING A28L SUBSTITUTION | IMMUNE SYSTEM                           |
| 2GU8                                                            | DISCOVERY OF 2-PYRIMIDYL-5-AMIDOTHIOPHENES AS NOVEL AND<br>POTENT INHIBITORS FOR AKT: SYNTHESIS AND SAR STUDIES  | SIGNALING PROTEIN,TRANSFERASE/INHIBITOR |
| 2GUO                                                            | HUMAN CLASS I MHC HLA-A2 IN COMPLEX WITH THE NATIVE<br>NONAMERIC MELAN-A/MART-1(27-35) PEPTIDE                   | IMMUNE SYSTEM                           |
| 2GUZ                                                            | STRUCTURE OF THE TIM14-TIM16 COMPLEX OF THE MITOCHONDRIAL<br>PROTEIN IMPORT MOTOR                                | CHAPERONE, PROTEIN TRANSPORT            |
| 2GV2                                                            | MDM2 IN COMPLEX WITH AN 8-MER P53 PEPTIDE ANALOGUE                                                               | LIGASE                                  |
| 2GV5                                                            | CRYSTAL STRUCTURE OF SFI1P/CDC31P COMPLEX                                                                        | CELL CYCLE                              |

|      |                                                                                                                                                                    |                                   |
|------|--------------------------------------------------------------------------------------------------------------------------------------------------------------------|-----------------------------------|
| 2GVD | COMPLEX OF GS- WITH THE CATALYTIC DOMAINS OF MAMMALIAN ADENYLYL CYCLASE: COMPLEX WITH TNP-ATP AND MN                                                               | LYASE                             |
| 2GVF | HCV NS3-4A PROTEASE DOMAIN COMPLEXED WITH A MACROCYCLIC KETOAMIDE INHIBITOR, SCH419021                                                                             | HYDROLASE                         |
| 2GVZ | CRYSTAL STRUCTURE OF COMPLEX OF GS- WITH THE CATALYTIC DOMAINS OF MAMMALIAN ADENYLYL CYCLASE: COMPLEX WITH MANT-ATP AND MN                                         | LYASE                             |
| 2GW4 | CRYSTAL STRUCTURE OF STONY CORAL FLUORESCENT PROTEIN KAEDE, RED FORM                                                                                               | LUMINESCENT PROTEIN               |
| 2GWF | STRUCTURE OF A USP8-NRDP1 COMPLEX                                                                                                                                  | HYDROLASE/LIGASE                  |
| 2GWW | HUMAN VINCULIN (HEAD DOMAIN, VH1, RESIDUES 1-258) IN COMPLEX WITH SHIGELLA'S IPAA VINCULIN BINDING SITE (RESIDUES 602-633)                                         | CELL ADHESION, STRUCTURAL PROTEIN |
| 2GY7 | ANGIOPOIETIN-2/TIE2 COMPLEX CRYSTAL STRUCTURE                                                                                                                      | SIGNALING PROTEIN                 |
| 2GY9 | STRUCTURE OF THE 30S SUBUNIT OF A PRE-TRANSLOCATIONAL E. COLI RIBOSOME OBTAINED BY FITTING ATOMIC MODELS FOR RNA AND PROTEIN COMPONENTS INTO CRYO-EM MAP EMD-1056  | RIBOSOME                          |
| 2GYA | STRUCTURE OF THE 50S SUBUNIT OF A PRE-TRANSLOCATIONAL E. COLI RIBOSOME OBTAINED BY FITTING ATOMIC MODELS FOR RNA AND PROTEIN COMPONENTS INTO CRYO-EM MAP EMD-1056  | RIBOSOME                          |
| 2GYB | STRUCTURE OF THE 30S SUBUNIT OF A SECM-STALLED E. COLI RIBOSOME COMPLEX OBTAINED BY FITTING ATOMIC MODELS FOR RNA AND PROTEIN COMPONENTS INTO CRYO-EM MAP EMD-1143 | RIBOSOME                          |
| 2GYC | STRUCTURE OF THE 50S SUBUNIT OF A SECM-STALLED E. COLI RIBOSOME COMPLEX OBTAINED BY FITTING ATOMIC MODELS FOR RNA AND PROTEIN COMPONENTS INTO CRYO-EM MAP EMD-1143 | RIBOSOME                          |
| 2GYK | CRYSTAL STRUCTURE OF THE COMPLEX OF THE COLICIN E9 DNASE DOMAIN WITH A MUTANT IMMUNITY PROTEIN, IMME9 (D51A)                                                       | ANTIBIOTIC/ANTIBIOTIC INHIBITOR   |
| 2GZD | CRYSTAL STRUCTURE OF RAB11 IN COMPLEX WITH RAB11-FIP2                                                                                                              | PROTEIN TRANSPORT                 |
| 2GZE | CRYSTAL STRUCTURE OF THE E9 DNASE DOMAIN WITH A MUTANT IMMUNITY PROTEIN IM9 (Y55A)                                                                                 | ANTIBIOTIC/ANTIBIOTIC INHIBITOR   |
| 2GZF | CRYSTAL STRUCTURE OF THE E9 DNASE DOMAIN WITH A MUTANT IMMUNITY PROTEIN IM9 (Y54F)                                                                                 | ANTIBIOTIC/ANTIBIOTIC INHIBITOR   |
| 2GZG | CRYSTAL STRUCTURE OF THE E9 DNASE DOMAIN WITH A MUTANT IMMUNITY PROTEIN IM9 (Y55F)                                                                                 | ANTIBIOTIC/ANTIBIOTIC INHIBITOR   |
| 2GZH | CRYSTAL STRUCTURE OF RAB11 IN COMPLEX WITH RAB11-FAMILY INTERACTING PROTEIN 2                                                                                      | PROTEIN TRANSPORT                 |
| 2GZI | CRYSTAL STRUCTURE OF THE E9 DNASE DOMAIN WITH A MUTANT IMMUNITY PROTEIN IM9 (V34A)                                                                                 | ANTIBIOTIC/ANTIBIOTIC INHIBITOR   |
| 2GZJ | CRYSTAL STRUCTURE OF THE E9 DNASE DOMAIN WITH A MUTANT IMMUNITY PROTEIN IM9 (D51A)                                                                                 | ANTIBIOTIC/ANTIBIOTIC INHIBITOR   |
| 2H0D | STRUCTURE OF A BMI-1-RING1B POLYCOMB GROUP UBIQUITIN LIGASE COMPLEX                                                                                                | METAL BINDING PROTEIN/LIGASE      |
| 2H1C | CRYSTAL STRUCTURE OF FITACB FROM NEISSERIA GONORRHOEAE                                                                                                             | GENE REGULATION                   |



|      |                                                                                                                                                                                                                        |                                   |
|------|------------------------------------------------------------------------------------------------------------------------------------------------------------------------------------------------------------------------|-----------------------------------|
| 2H1L | THE STRUCTURE OF THE ONCOPROTEIN SV40 LARGE T ANTIGEN AND P53 TUMOR SUPPRESSOR COMPLEX                                                                                                                                 | VIRUS/VIRAL PROTEIN               |
| 2H1O | STRUCTURE OF FITAB BOUND TO IR36 DNA FRAGMENT                                                                                                                                                                          | GENE REGULATION/DNA COMPLEX       |
| 2H1P | THE THREE-DIMENSIONAL STRUCTURES OF A POLYSACCHARIDE BINDING ANTIBODY TO CRYPTOCOCCUS NEOFORMANS AND ITS COMPLEX WITH A PEPTIDE FROM A PHAGE DISPLAY LIBRARY: IMPLICATIONS FOR THE IDENTIFICATION OF PEPTIDE MIMOTOPES | COMPLEX (ANTIBODY/PEPTIDE)        |
| 2H2D | THE STRUCTURAL BASIS FOR SIRTUIN SUBSTRATE AFFINITY                                                                                                                                                                    | HYDROLASE                         |
| 2H2F | THE STRUCTURAL BASIS FOR SIRTUIN SUBSTRATE AFFINITY                                                                                                                                                                    | HYDROLASE                         |
| 2H2G | THE STRUCTURAL BASIS OF SIRTUIN SUBSTRATE AFFINITY                                                                                                                                                                     | HYDROLASE                         |
| 2H2H | THE STRUCTURAL BASIS OF SIRTUIN SUBSTRATE SPECIFICITY                                                                                                                                                                  | HYDROLASE                         |
| 2H2P | CRYSTAL STRUCTURE OF CLC-EC1 IN COMPLEX WITH FAB FRAGMENT IN SECN-                                                                                                                                                     | ION TRANSPORT                     |
| 2H2S | CRYSTAL STRUCTURE OF E148A MUTANT OF CLC-EC1 IN SECN-                                                                                                                                                                  | ION TRANSPORT                     |
| 2H3E | STRUCTURE OF WILD-TYPE E. COLI ASPARTATE TRANSCARBAMOYLASE IN THE PRESENCE OF N-PHOSPHONACETYL-L-ISOASPARAGINE AT 2.3A RESOLUTION                                                                                      | TRANSFERASE                       |
| 2H3N | CRYSTAL STRUCTURE OF A SURROGATE LIGHT CHAIN (LAMBDA5 AND VP(B) HOMODIMER)                                                                                                                                             | IMMUNE SYSTEM                     |
| 2H3X | CRYSTAL STRUCTURE OF AN ELECTRON TRANSFER COMPLEX BETWEEN AROMATIC AMINE DEHYDROGENASE AND AZURIN FROM ALCALIGENES FAECALIS (FORM 3)                                                                                   | OXIDOREDUCTASE/ELECTRON TRANSPORT |
| 2H43 | CRYSTAL STRUCTURE OF HUMAN FRAGMENT D COMPLEXED WITH ALA-HIS-ARG-PRO-AMIDE                                                                                                                                             | BLOOD CLOTTING                    |
| 2H47 | CRYSTAL STRUCTURE OF AN ELECTRON TRANSFER COMPLEX BETWEEN AROMATIC AMINE DEPHYDROGENASE AND AZURIN FROM ALCALIGENES FAECALIS (FORM 1)                                                                                  | OXIDOREDUCTASE/ELECTRON TRANSPORT |
| 2H48 | CRYSTAL STRUCTURE OF HUMAN CASPASE-1 (CYS362->ALA, CYS364->ALA, CYS397->ALA) IN COMPLEX WITH 3-[2-(2-BENZYLOXYCARBONYLAMINO-3-METHYL-BUTYRYLAMINO)-PROPIONYLAMINO]-4-OXO-PENTANOIC ACID (Z-VAD-FMK)                    | HYDROLASE                         |
| 2H4C | STRUCTURE OF DABOIIATOXIN (HETERODIMERIC PLA2 VENOM)                                                                                                                                                                   | HYDROLASE                         |
| 2H4F | SIR2-P53 PEPTIDE-NAD+                                                                                                                                                                                                  | HYDROLASE                         |
| 2H4H | SIR2 H116Y MUTANT-P53 PEPTIDE-NAD                                                                                                                                                                                      | HYDROLASE                         |
| 2H4J | SIR2-DEACETYLATED PEPTIDE (FROM ENZYMATIC TURNOVER IN CRYSTAL)                                                                                                                                                         | HYDROLASE                         |
| 2H4M | KARYOPHERIN BETA2/TRANSPORTIN-M9NLS                                                                                                                                                                                    | PROTEIN TRANSPORT                 |
| 2H4P | CRYSTAL STRUCTURE OF WILDTYPE MENT IN THE CLEAVED CONFORMATION                                                                                                                                                         | HYDROLASE INHIBITOR               |
| 2H4Q | CRYSTAL STRUCTURE OF A M-LOOP DELETION VARIANT OF MENT IN THE CLEAVED CONFORMATION                                                                                                                                     | HYDROLASE INHIBITOR               |
| 2H4W | CRYSTAL STRUCTURE OF HUMAN CASPASE-1 (GLU390->ASP) IN                                                                                                                                                                  | HYDROLASE                         |

|      |                                                                                                                                                                                           |                                          |
|------|-------------------------------------------------------------------------------------------------------------------------------------------------------------------------------------------|------------------------------------------|
|      | COMPLEX WITH 3-[2-(2-BENZYLOXYCARBONYLAMINO-3-METHYL-BUTYRYLAMINO)-PROPIONYLAMINO]-4-OXO-PENTANOIC ACID (Z-VAD-FMK)                                                                       |                                          |
| 2H4Y | CRYSTAL STRUCTURE OF HUMAN CASPASE-1 (ARG286->LYS) IN COMPLEX WITH 3-[2-(2-BENZYLOXYCARBONYLAMINO-3-METHYL-BUTYRYLAMINO)-PROPIONYLAMINO]-4-OXO-PENTANOIC ACID (Z-VAD-FMK)                 | HYDROLASE                                |
| 2H51 | CRYSTAL STRUCTURE OF HUMAN CASPASE-1 (GLU390->ASP AND ARG286->LYS) IN COMPLEX WITH 3-[2-(2-BENZYLOXYCARBONYLAMINO-3-METHYL-BUTYRYLAMINO)-PROPIONYLAMINO]-4-OXO-PENTANOIC ACID (Z-VAD-FMK) | HYDROLASE                                |
| 2H54 | CRYSTAL STRUCTURE OF HUMAN CASPASE-1 (THR388->ALA) IN COMPLEX WITH 3-[2-(2-BENZYLOXYCARBONYLAMINO-3-METHYL-BUTYRYLAMINO)-PROPIONYLAMINO]-4-OXO-PENTANOIC ACID (Z-VAD-FMK)                 | HYDROLASE                                |
| 2H59 | SIR2 H116A-DEACETYLATED P53 PEPTIDE-3'-O-ACETYL ADP RIBOSE                                                                                                                                | HYDROLASE                                |
| 2H5I | CRYSTAL STRUCTURE OF CASPASE-3 WITH INHIBITOR AC-DEVD-CHO                                                                                                                                 | HYDROLASE                                |
| 2H5J | CRYSTAL STRUSTURE OF CASPASE-3 WITH INHIBITOR AC-DMQD-CHO                                                                                                                                 | HYDROLASE                                |
| 2H6I | X-RAY STRUCTURE OF HUMAN CA2+-LOADED S100B                                                                                                                                                | METAL BINDING PROTEIN, SIGNALING PROTEIN |
| 2H62 | CRYSTAL STRUCTURE OF A TERNARY LIGAND-RECEPTOR COMPLEX OF BMP-2                                                                                                                           | HORMONE/GROWTH FACTOR                    |
| 2H64 | CRYSTAL STRUCTURE OF A TERNARY LIGAND-RECEPTOR COMPLEX OF BMP-2                                                                                                                           | HORMONE/GROWTH FACTOR                    |
| 2H65 | CRYSTAL STRUSTURE OF CASPASE-3 WITH INHIBITOR AC-VDVAD-CHO                                                                                                                                | HYDROLASE                                |
| 2H6F | PROTEIN FARNESYLTRANSFERASE COMPLEXED WITH A FARNESYLATED DDPTASACVLS PEPTIDE PRODUCT AT 1.5A RESOLUTION                                                                                  | TRANSFERASE                              |
| 2H6G | W102T PROTEIN FARNESYLTRANSFERASE MUTANT COMPLEXED WITH A GERANYLGERANYLATED DDPTASACVLS PEPTIDE PRODUCT AT 1.85A RESOLUTION                                                              | TRANSFERASE                              |
| 2H6H | Y365F PROTEIN FARNESYLTRANSFERASE MUTANT COMPLEXED WITH A FARNESYLATED DDPTASACVLS PEPTIDE PRODUCT AT 1.8A                                                                                | TRANSFERASE                              |
| 2H6I | W102T/Y365F PROTEIN FARNESYLTRANSFERASE DOUBLE MUTANT COMPLEXED WITH A GERANYLGERANYLATED DDPTASACVLS PEPTIDE PRODUCT AT 3.0A                                                             | TRANSFERASE                              |
| 2H6J | CRYSTAL STRUCTURE OF THE BETA F145A RHODOCOCCLUS PROTEASOME (CASP TARGET)                                                                                                                 | HYDROLASE                                |
| 2H6M | AN EPISULFIDE CATION (THIIRANIUM RING) TRAPPED IN THE ACTIVE SITE OF HAV 3C PROTEINASE INACTIVATED BY PEPTIDE-BASED KETONE INHIBITORS                                                     | HYDROLASE/HYDROLASE INHIBITOR            |
| 2H6P | CRYSTAL STRUCTURE OF HLA-B*3501 PRESENTING THE HUMAN CYTOCHROME P450 DERIVED PEPTIDE, KPIVVLHGY                                                                                           | IMMUNE SYSTEM                            |
| 2H7E | SOLUTION STRUCTURE OF THE TALIN F3 DOMAIN IN COMPLEX WITH A CHIMERIC BETA3 INTEGRIN-PIP KINASE PEPTIDE- MINIMIZED AVERAGE STRUCTURE                                                       | STRUCTURAL PROTEIN                       |
| 2H7V | CO-CRYSTAL STRUCTURE OF YPKA-RAC1                                                                                                                                                         | SIGNALING PROTEIN                        |

|      |                                                                                                                                                                           |                           |
|------|---------------------------------------------------------------------------------------------------------------------------------------------------------------------------|---------------------------|
| 2H88 | AVIAN MITOCHONDRIAL RESPIRATORY COMPLEX II AT 1.8 ANGSTROM RESOLUTION                                                                                                     | OXIDOREDUCTASE            |
| 2H89 | AVIAN RESPIRATORY COMPLEX II WITH MALONATE BOUND                                                                                                                          | OXIDOREDUCTASE            |
| 2H8D | CRYSTAL STRUCTURE OF DEOXY HEMOGLOBIN FROM TREMATOMUS BERNACCHII AT PH 8.4                                                                                                | TRANSPORT PROTEIN         |
| 2H8F | CRYSTAL STRUCTURE OF DEOXY HEMOGLOBIN FROM TREMATOMUS BERNACCHII AT PH 6.2                                                                                                | TRANSPORT PROTEIN         |
| 2H8P | STRUCTURE OF A K CHANNEL WITH AN AMIDE TO ESTER SUBSTITUTION IN THE SELECTIVITY FILTER                                                                                    | MEMBRANE PROTEIN          |
| 2H96 | DISCOVERY OF POTENT, HIGHLY SELECTIVE, AND ORALLY BIOAVAILABLE PYRIDINE CARBOXAMIDE C-JUN NH2-TERMINAL KINASE INHIBITORS                                                  | TRANSCRIPTION             |
| 2H9A | CORRINOID IRON-SULFUR PROTEIN                                                                                                                                             | OXIDOREDUCTASE            |
| 2H9E | CRYSTAL STRUCTURE OF FXA/SELECTIDE/NAPC2 TERNARY COMPLEX                                                                                                                  | HYDROLASE, BLOOD CLOTTING |
| 2H9G | CRYSTAL STRUCTURE OF PHAGE DERIVED FAB BDF1 WITH HUMAN DEATH RECEPTOR 5 (DR5)                                                                                             | IMMUNE SYSTEM/APOTOSIS    |
| 2H9H | AN EPISULFIDE CATION (THIIRANIUM RING) TRAPPED IN THE ACTIVE SITE OF HAV 3C PROTEINASE INACTIVATED BY PEPTIDE-BASED KETONE INHIBITORS                                     | HYDROLASE                 |
| 2H9T | CRYSTAL STRUCTURE OF HUMAN ALPHA-THROMBIN IN COMPLEX WITH SURAMIN                                                                                                         | HYDROLASE                 |
| 2HAL | AN EPISULFIDE CATION (THIIRANIUM RING) TRAPPED IN THE ACTIVE SITE OF HAV 3C PROTEINASE INACTIVATED BY PEPTIDE-BASED KETONE INHIBITORS                                     | HYDROLASE                 |
| 2HAN | STRUCTURAL BASIS OF HETERODIMERIC ECDYSTEROID RECEPTOR INTERACTION WITH NATURAL RESPONSE ELEMENT HSP27 GENE PROMOTER                                                      | TRANSCRIPTION/DNA         |
| 2HBC | HIGH RESOLUTION X-RAY STRUCTURES OF MYOGLOBIN-AND HEMOGLOBIN-ALKYL ISOCYANIDE COMPLEXES                                                                                   | OXYGEN TRANSPORT          |
| 2HBD | HIGH RESOLUTION X-RAY STRUCTURES OF MYOGLOBIN-AND HEMOGLOBIN-ALKYL ISOCYANIDE COMPLEXES                                                                                   | OXYGEN TRANSPORT          |
| 2HBE | HIGH RESOLUTION X-RAY STRUCTURES OF MYOGLOBIN-AND HEMOGLOBIN-ALKYL ISOCYANIDE COMPLEXES                                                                                   | OXYGEN TRANSPORT          |
| 2HBF | HIGH RESOLUTION X-RAY STRUCTURES OF MYOGLOBIN-AND HEMOGLOBIN-ALKYL ISOCYANIDE COMPLEXES                                                                                   | OXYGEN TRANSPORT          |
| 2HBH | CRYSTAL STRUCTURE OF VITAMIN D NUCLEAR RECEPTOR LIGAND BINDING DOMAIN BOUND TO A LOCKED SIDE-CHAIN ANALOG OF CALCITRIOL AND SRC-1 PEPTIDE                                 | GENE REGULATION           |
| 2HBQ | CRYSTAL STRUCTURE OF WILDTYPE HUMAN CASPASE-1 IN COMPLEX WITH 3-[2-(2-BENZYLOXYCARBONYLAMINO-3-METHYL-BUTYRYLAMINO)-PROPIONYLAMINO]-4-OXO-PENTANOIC ACID (Z-VAD-FMK)      | HYDROLASE                 |
| 2HBR | CRYSTAL STRUCTURE OF HUMAN CASPASE-1 (ARG286->ALA) IN COMPLEX WITH 3-[2-(2-BENZYLOXYCARBONYLAMINO-3-METHYL-BUTYRYLAMINO)-PROPIONYLAMINO]-4-OXO-PENTANOIC ACID (Z-VAD-FMK) | HYDROLASE                 |

|      |                                                                                                                                                                                                                              |                                         |
|------|------------------------------------------------------------------------------------------------------------------------------------------------------------------------------------------------------------------------------|-----------------------------------------|
| 2HBS | THE HIGH RESOLUTION CRYSTAL STRUCTURE OF DEOXYHEMOGLOBIN S                                                                                                                                                                   | OXYGEN TRANSPORT                        |
| 2HBY | CRYSTAL STRUCTURE OF HUMAN CASPASE-1 (GLU390->ALA) IN COMPLEX WITH 3-[2-(2-BENZYLOXYCARBONYLAMINO-3-METHYL-BUTYRYLAMINO)-PROPIONYLAMINO]-4-OXO-PENTANOIC ACID (Z-VAD-FMK)                                                    | HYDROLASE                               |
| 2HBZ | CRYSTAL STRUCTURE OF HUMAN CASPASE-1 (ARG286->ALA, GLU390->ALA) IN COMPLEX WITH 3-[2-(2-BENZYLOXYCARBONYLAMINO-3-METHYL-BUTYRYLAMINO)-PROPIONYLAMINO]-4-OXO-PENTANOIC ACID (Z-VAD-FMK)                                       | HYDROLASE                               |
| 2HC4 | CRYSTAL STRUCTURE OF THE LBD OF VDR OF DANIO RERIO IN COMPLEX WITH CALCITRIOL                                                                                                                                                | GENE REGULATION                         |
| 2HCD | CRYSTAL STRUCTURE OF THE LIGAND BINDING DOMAIN OF THE VITAMIN D NUCLEAR RECEPTOR IN COMPLEX WITH GEMINI AND A COACTIVATOR PEPTIDE                                                                                            | GENE REGULATION                         |
| 2HCJ | "TRYPSIN-MODIFIED ELONGATION FACTOR TU IN COMPLEX WITH TETRACYCLINE"                                                                                                                                                         | TRANSLATION                             |
| 2HCO | THE STRUCTURE OF HUMAN CARBONMONOXY HAEMOGLOBIN AT 2.7 ANGSTROMS RESOLUTION                                                                                                                                                  | OXYGEN TRANSPORT                        |
| 2HD4 | CRYSTAL STRUCTURE OF PROTEINASE K INHIBITED BY A LACTOFERRIN OCTAPEPTIDE GLY-ASP-GLU-GLN-GLY-GLU-ASN-LYS AT 2.15 A RESOLUTION                                                                                                | HYDROLASE                               |
| 2HD5 | USP2 IN COMPLEX WITH UBIQUITIN                                                                                                                                                                                               | HYDROLASE                               |
| 2HDI | CRYSTAL STRUCTURE OF THE COLICIN I RECEPTOR CIR FROM E.COLI IN COMPLEX WITH RECEPTOR BINDING DOMAIN OF COLICIN IA.                                                                                                           | PROTEIN TRANSPORT,ANTIMICROBIAL PROTEIN |
| 2HDN | TRYPSIN-MODIFIED ELONGATION FACTOR TU IN COMPLEX WITH TETRACYCLINE AT 2.8 ANGSTROM RESOLUTION                                                                                                                                | TRANSLATION                             |
| 2HDX | CRYSTAL STRUCTURE OF THE SRC HOMOLOGY-2 DOMAIN OF SH2-B IN COMPLEX WITH JAK2 PTYR813 PHOSHOPEPTIDE                                                                                                                           | SIGNALING PROTEIN                       |
| 2HFE | RB+ COMPLEX OF A K CHANNEL WITH AN AMIDE TO ESTER SUBSTITUTION IN THE SELECTIVITY FILTER                                                                                                                                     | MEMBRANE PROTEIN                        |
| 2HFF | CRYSTAL STRUCTURE OF CB2 FAB                                                                                                                                                                                                 | IMMUNE SYSTEM                           |
| 2HFG | CRYSTAL STRUCTURE OF HBR3 BOUND TO CB3S-FAB                                                                                                                                                                                  | IMMUNE SYSTEM                           |
| 2HFP | CRYSTAL STRUCTURE OF PPAR GAMMA WITH N-SULFONYL-2-INDOLE CARBOXAMIDE LIGANDS                                                                                                                                                 | TRANSCRIPTION                           |
| 2HG3 | REACTION CENTRE FROM RHODOBACTER SPHAEROIDES STRAIN R-26.1 COMPLEXED WITH BROMINATED PHOSPHATIDYLCHOLINE                                                                                                                     | PHOTOSYNTHESIS/MEMBRANE PROTEIN         |
| 2HG5 | CS+ COMPLEX OF A K CHANNEL WITH AN AMIDE TO ESTER SUBSTITUTION IN THE SELECTIVITY FILTER                                                                                                                                     | MEMBRANE PROTEIN                        |
| 2HG9 | REACTION CENTRE FROM RHODOBACTER SPHAEROIDES STRAIN R-26.1 COMPLEXED WITH TETRABROMINATED PHOSPHATIDYLCHOLINE                                                                                                                | PHOTOSYNTHESIS/MEMBRANE PROTEIN         |
| 2HGI | CRYSTAL STRUCTURE OF THE 70S THERMUS THERMOPHILUS RIBOSOME SHOWING HOW THE 16S 3'-END MIMICKS MRNA E AND P CODONS. THIS ENTRY 2HGI CONTAINS 30S RIBOSOMAL SUBUNIT. THE 50S RIBOSOMAL SUBUNIT CAN BE FOUND IN PDB ENTRY 2HGJ. | RIBOSOME                                |
| 2HGJ | CRYSTAL STRUCTURE OF THE 70S THERMUS THERMOPHILUS RIBOSOME                                                                                                                                                                   | RIBOSOME                                |

SHOWING HOW THE 16S 3'-END MIMICKS MRNA E AND P CODONS.  
THIS ENTRY 2HGJ CONTAINS 50S RIBOSOMAL SUBUNIT. THE 30S  
RIBOSOMAL SUBUNIT CAN BE FOUND IN PDB ENTRY 2HGI.

|      |                                                                                                                                                                                                                           |                                        |
|------|---------------------------------------------------------------------------------------------------------------------------------------------------------------------------------------------------------------------------|----------------------------------------|
| 2HGP | CRYSTAL STRUCTURE OF THE 70S THERMUS THERMOPHILUS RIBOSOME WITH TRANSLOCATED AND ROTATED SHINE-DALGARNO DUPLEX. THIS ENTRY 2HGP CONTAINS 30S RIBOSOMAL SUBUNIT. THE 50S RIBOSOMAL SUBUNIT CAN BE FOUND IN PDB ENTRY 2HGQ. | RIBOSOME                               |
| 2HGQ | CRYSTAL STRUCTURE OF THE 70S THERMUS THERMOPHILUS RIBOSOME WITH TRANSLOCATED AND ROTATED SHINE-DALGARNO DUPLEX. THIS ENTRY 2HGQ CONTAINS 50S RIBOSOMAL SUBUNIT. THE 30S RIBOSOMAL SUBUNIT CAN BE FOUND IN PDB ENTRY 2HGP. | RIBOSOME                               |
| 2HGR | 70S T.TH. RIBOSOME FUNCTIONAL COMPLEX WITH MRNA AND E- AND P-SITE TRNAS AT 4.5A. THIS ENTRY 2HGR CONTAINS 30S RIBOSOMAL SUBUNIT. THE 50S RIBOSOMAL SUBUNIT CAN BE FOUND IN PDB ENTRY 2HGU.                                | RIBOSOME                               |
| 2HGT | STRUCTURE OF THE HIRUGEN AND HIRULOG 1 COMPLEXES OF ALPHA-THROMBIN                                                                                                                                                        | HYDROLASE(SERINE PROTEASE)             |
| 2HGU | 70S T.TH. RIBOSOME FUNCTIONAL COMPLEX WITH MRNA AND E- AND P-SITE TRNAS AT 4.5A. THIS ENTRY 2HGU CONTAINS 50S RIBOSOMAL SUBUNIT. THE 30S RIBOSOMAL SUBUNIT CAN BE FOUND IN PDB ENTRY 2HGR.                                | RIBOSOME                               |
| 2HH0 | STRUCTURE OF AN ANTI-PRP FAB, P-CLONE, IN COMPLEX WITH ITS COGNATE BOVINE PEPTIDE EPITOPE.                                                                                                                                | IMMUNE SYSTEM                          |
| 2HH1 | REACTION CENTRE FROM RHODOBACTER SPHAEROIDES STRAIN R-26.1 COMPLEXED WITH DIBROMINATED PHOSPHATIDYLCHOLINE                                                                                                                | PHOTOSYNTHESIS/MEMBRANE PROTEIN        |
| 2HHB | THE CRYSTAL STRUCTURE OF HUMAN DEOXYHAEMOGLOBIN AT 1.74 ANGSTROMS RESOLUTION                                                                                                                                              | OXYGEN TRANSPORT                       |
| 2HHD | OXYGEN AFFINITY MODULATION BY THE N-TERMINI OF THE BETA-CHAINS IN HUMAN AND BOVINE HEMOGLOBIN                                                                                                                             | OXYGEN TRANSPORT                       |
| 2HHE | OXYGEN AFFINITY MODULATION BY THE N-TERMINI OF THE BETA CHAINS IN HUMAN AND BOVINE HEMOGLOBIN                                                                                                                             | OXYGEN TRANSPORT                       |
| 2HHF | X-RAY CRYSTAL STRUCTURE OF OXIDIZED HUMAN MITOCHONDRIAL BRANCHED CHAIN AMINOTRANSFERASE (HBCATM)                                                                                                                          | TRANSFERASE                            |
| 2HHH | CRYSTAL STRUCTURE OF KASUGAMYCIN BOUND TO THE 30S RIBOSOMAL SUBUNIT                                                                                                                                                       | RIBOSOME                               |
| 2HHK | REACTION CENTRE FROM RHODOBACTER SPHAEROIDES STRAIN R-26.1 COMPLEXED WITH DIBROMINATED PHOSPHATIDYLGlycerol                                                                                                               | PHOTOSYNTHESIS/MEMBRANE PROTEIN        |
| 2HI7 | CRYSTAL STRUCTURE OF DSBA-DSBB-UBIQUINONE COMPLEX                                                                                                                                                                         | OXIDOREDUCTASE                         |
| 2HI8 | HUMAN FORMYLGlycine GENERATING ENZYME, C336S MUTANT, BROMIDE CO-CRYSTALLIZATION                                                                                                                                           | HYDROLASE ACTIVATOR, PROTEIN BINDING   |
| 2HII | HETEROTRIMERIC PCNA SLIDING CLAMP                                                                                                                                                                                         | REPLICATION                            |
| 2HIK | HETEROTRIMERIC PCNA SLIDING CLAMP                                                                                                                                                                                         | REPLICATION                            |
| 2HIO | HISTONE OCTAMER (CHICKEN), CHROMOSOMAL PROTEIN                                                                                                                                                                            | STRUCTURAL PROTEIN,DNA BINDING PROTEIN |
| 2HIT | REACTION CENTRE FROM RHODOBACTER SPHAEROIDES STRAIN R-26.1 COMPLEXED WITH DIBROMINATED PHOSPHATIDYLETHANOLAMINE                                                                                                           | PHOTOSYNTHESIS/MEMBRANE PROTEIN        |

|      |                                                                                                                                                                    |                                    |
|------|--------------------------------------------------------------------------------------------------------------------------------------------------------------------|------------------------------------|
| 2HJ4 | CRYSTAL STRUCTURE OF ALCALIGENES FAECALIS AADH COMPLEX WITH P-NITROBENZYLAMINE                                                                                     | OXIDOREDUCTASE                     |
| 2HJ6 | REACTION CENTRE FROM RHODOBACTER SPHAEROIDES STRAIN R-26.1 COMPLEXED WITH DIBROMINATED PHOSPHATIDYLSERINE                                                          | PHOTOSYNTHESIS/MEMBRANE PROTEIN    |
| 2HJ9 | CRYSTAL STRUCTURE OF THE AUTOINDUCER-2-BOUND FORM OF VIBRIO HARVEYI LUXP COMPLEXED WITH THE PERIPLASMIC DOMAIN OF LUXQ                                             | SIGNALING PROTEIN                  |
| 2HJB | CRYSTAL STRUCTURE OF ALCALIGENES FAECALIS AADH IN COMPLEX WITH P-METHOXYBENZYLAMINE                                                                                | OXIDOREDUCTASE                     |
| 2HJF | POTASSIUM CHANNEL KCSA-FAB COMPLEX WITH TETRABUTYLAMMONIUM (TBA)                                                                                                   | METAL TRANSPORT                    |
| 2HJK | CRYSTAL STRUCTURE OF HLA-B5703 AND HIV-1 PEPTIDE                                                                                                                   | IMMUNE SYSTEM                      |
| 2HJL | CRYSTAL STRUCTURE OF HLA-B5703 AND HIV-1 PEPTIDE                                                                                                                   | IMMUNE SYSTEM                      |
| 2HKF | CRYSTAL STRUCTURE OF THE COMPLEX FAB M75- PEPTIDE                                                                                                                  | IMMUNE SYSTEM                      |
| 2HKH | CRYSTAL STRUCTURE OF THE FAB M75                                                                                                                                   | IMMUNE SYSTEM                      |
| 2HKM | CRYSTAL STRUCTURE OF THE SCHIFF BASE INTERMEDIATE IN THE REDUCTIVE HALF-REACTION OF AROMATIC AMINE DEHYDROGENASE (AADH) WITH PHENYLETHYLAMINE.                     | OXIDOREDUCTASE                     |
| 2HKQ | CRYSTAL STRUCTURE OF THE C-TERMINAL DOMAIN OF HUMAN EB1 IN COMPLEX WITH THE CAP-GLY DOMAIN OF HUMAN DYNACTIN-1 (P150-GLUED)                                        | STRUCTURAL PROTEIN                 |
| 2HKR | STRUCTURES OF THE CARBINOLAMINE AND SCHIFF-BASE INTERMEDIATES IN THE REDUCTIVE HALF-REACTION OF AROMATIC AMINE DEHYDROGENASE (AADH) WITH P-METHOXYPHENYLETHYLAMINE | OXIDOREDUCTASE                     |
| 2HL5 | CRYSTAL STRUCTURE OF THE C-TERMINAL DOMAIN OF HUMAN EB1 IN COMPLEX WITH THE A49M MUTANT CAP-GLY DOMAIN OF HUMAN DYNACTIN-1 (P150-GLUED)                            | STRUCTURAL PROTEIN                 |
| 2HLB | A STRUCTURAL BASIS FOR NUCLEOTIDE EXCHANGE ON G-ALPHA-I SUBUNITS AND RECEPTOR COUPLING SPECIFICITY                                                                 | SIGNALING PROTEIN                  |
| 2HLD | CRYSTAL STRUCTURE OF YEAST MITOCHONDRIAL F1-ATPASE                                                                                                                 | HYDROLASE                          |
| 2HLF | STRUCTURE OF THE ESCHERICHIA COLI CLC CHLORIDE CHANNEL Y445E MUTANT AND FAB COMPLEX                                                                                | PROTON TRANSPORT, MEMBRANE PROTEIN |
| 2HLO | CRYSTAL STRUCTURE OF FRAGMENT D-DIMER FROM HUMAN FIBRIN COMPLEXED WITH GLY-HYDROXYPRO-ARG-PRO-AMIDE                                                                | BLOOD CLOTTING                     |
| 2HMG | REFINEMENT OF THE INFLUENZA VIRUS HEMAGGLUTININ BY SIMULATED ANNEALING                                                                                             | VIRAL PROTEIN                      |
| 2HMH | CRYSTAL STRUCTURE OF SOCS3 IN COMPLEX WITH GP130(PYR757) PHOSPHOPEPTIDE.                                                                                           | CYTOKINE REGULATOR                 |
| 2HMI | HIV-1 REVERSE TRANSCRIPTASE/FRAGMENT OF FAB 28/DNA COMPLEX                                                                                                         | IMMUNE SYSTEM/DNA                  |
| 2HMJ | CRYSTAL STRUCTURE OF THE NAPHTHALENE 1,2-DIOXYGENASE PHE-352-VAL MUTANT.                                                                                           | OXIDOREDUCTASE                     |
| 2HMK | CRYSTAL STRUCTURE OF NAPHTHALENE 1,2-DIOXYGENASE BOUND TO PHENANTHRENE                                                                                             | OXIDOREDUCTASE                     |
| 2HML | CRYSTAL STRUCTURE OF THE NAPHTHALENE 1,2-DIOXYGENASE F352V                                                                                                         | OXIDOREDUCTASE                     |

## MUTANT BOUND TO PHENANTHRENE.

|      |                                                                                                                                  |                                  |
|------|----------------------------------------------------------------------------------------------------------------------------------|----------------------------------|
| 2HMM | CRYSTAL STRUCTURE OF NAPHTHALENE 1,2-DIOXYGENASE BOUND TO ANTHRACENE                                                             | OXIOREDUCTASE                    |
| 2HMN | CRYSTAL STRUCTURE OF THE NAPHTHALENE 1,2-DIOXYGENASE F352V MUTANT BOUND TO ANTHRACENE.                                           | OXIDOREDUCTASE                   |
| 2HMO | CRYSTAL STRUCTURE OF NAPHTHALENE 1,2-DIOXYGENASE BOUND TO 3-NITROTOLUENE.                                                        | OXIDOREDUCTASE                   |
| 2HN7 | HLA-A*1101 IN COMPLEX WITH HBV PEPTIDE HOMOLOGUE                                                                                 | IMMUNE SYSTEM                    |
| 2HND | CRYSTAL STRUCTURE OF K101E MUTANT HIV-1 REVERSE TRANSCRIPTASE IN COMPLEX WITH NEVIRAPINE                                         | TRANSFERASE                      |
| 2HNT | CRYSTALLOGRAPHIC STRUCTURE OF HUMAN GAMMA-THROMBIN                                                                               | SERINE PROTEASE                  |
| 2HNY | CRYSTAL STRUCTURE OF E138K MUTANT HIV-1 REVERSE TRANSCRIPTASE IN COMPLEX WITH NEVIRAPINE                                         | TRANSFERASE                      |
| 2HNZ | CRYSTAL STRUCTURE OF E138K MUTANT HIV-1 REVERSE TRANSCRIPTASE IN COMPLEX WITH PETT-2                                             | TRANSFERASE                      |
| 2HOD | CRYSTAL STRUCTURE OF FRAGMENT D FROM HUMAN FIBRINOGEN COMPLEXED WITH GLY-HYDROXYPRO-ARG-PRO-AMIDE                                | BLOOD CLOTING                    |
| 2HP0 | CRYSTAL STRUCTURE OF IMINODISUCCINATE EPIMERASE                                                                                  | ISOMERASE                        |
| 2HPC | CRYSTAL STRUCTURE OF FRAGMENT D FROM HUMAN FIBRINOGEN COMPLEXED WITH GLY-PRO-ARG-PRO-AMIDE.                                      | BLOOD CLOTING                    |
| 2HPE | COMPARISON OF THE STRUCTURES OF HIV-2 PROTEASE COMPLEXES IN THREE CRYSTAL SPACE GROUPS WITH AN HIV-1 PROTEASE COMPLEX STRUCTURE  | HYDROLASE(ACID PROTEASE)         |
| 2HPF | COMPARISON OF THE STRUCTURES OF HIV-2 PROTEASE COMPLEXES IN THREE CRYSTAL SPACE GROUPS WITH AN HIV-1 PROTEASE COMPLEX STRUCTURE  | HYDROLASE(ACID PROTEASE)         |
| 2HPL | CRYSTAL STRUCTURE OF THE MOUSE P97/PNGASE COMPLEX                                                                                | HYDROLASE                        |
| 2HPP | STRUCTURES OF THE NONCOVALENT COMPLEXES OF HUMAN AND BOVINE PROTHROMBIN FRAGMENT 2 WITH HUMAN PPACK-THROMBIN                     | HYDROLASE(SERINE PROTEINASE)     |
| 2HPQ | STRUCTURES OF THE NONCOVALENT COMPLEXES OF HUMAN AND BOVINE PROTHROMBIN FRAGMENT 2 WITH HUMAN PPACK-THROMBIN                     | HYDROLASE(SERINE PROTEINASE)     |
| 2HPZ | CRYSTAL STRUCTURE OF PROTEINASE K COMPLEX WITH A SYNTHETIC PEPTIDE KLKLLVIRLK AT 1.69 Å RESOLUTION                               | HYDROLASE                        |
| 2HQS | CRYSTAL STRUCTURE OF TOLB/PAL COMPLEX                                                                                            | TRANSPORT PROTEIN/LIPOPROTEIN    |
| 2HQW | CRYSTAL STRUCTURE OF CA <sup>2+</sup> /CALMODULIN BOUND TO NMDA RECEPTOR NR1C1 PEPTIDE                                           | METAL BINDING PROTEIN            |
| 2HR0 | STRUCTURE OF COMPLEMENT C3B: INSIGHTS INTO COMPLEMENT ACTIVATION AND REGULATION                                                  | IMMUNE SYSTEM                    |
| 2HRK | STRUCTURAL BASIS OF YEAST AMINOACYL-TRNA SYNTHETASE COMPLEX FORMATION REVEALED BY CRYSTAL STRUCTURES OF TWO BINARY SUB-COMPLEXES | LIGASE/RNA BINDING PROTEIN       |
| 2HRP | ANTIGEN-ANTIBODY COMPLEX                                                                                                         | COMPLEX (IMMUNOGLOBULIN/PEPTIDE) |

|      |                                                                                                                                   |                                    |
|------|-----------------------------------------------------------------------------------------------------------------------------------|------------------------------------|
| 2HSE | STRUCTURE OF D236A E. COLI ASPARTATE TRANSCARBAMOYLASE IN THE PRESENCE OF PHOSPHONOACETAMIDE AND L-ASPARTATE AT 2.60 Å RESOLUTION | TRANSFERASE                        |
| 2HSM | STRUCTURAL BASIS OF YEAST AMINOACYL-TRNA SYNTHETASE COMPLEX FORMATION REVEALED BY CRYSTAL STRUCTURES OF TWO BINARY SUB-COMPLEXES  | LIGASE/RNA BINDING PROTEIN         |
| 2HSN | STRUCTURAL BASIS OF YEAST AMINOACYL-TRNA SYNTHETASE COMPLEX FORMATION REVEALED BY CRYSTAL STRUCTURES OF TWO BINARY SUB-COMPLEXES  | LIGASE/RNA BINDING PROTEIN         |
| 2HSQ | HUMAN VINCULIN (HEAD DOMAIN, VH1, RESIDUES 1-258) IN COMPLEX WITH SHIGELLA'S IPAA VINCULIN BINDING SITE 2 (RESIDUES 565-587)      | CELL ADHESION, STRUCTURAL PROTEIN  |
| 2HT0 | IHF BOUND TO DOUBLY NICKED DNA                                                                                                    | TRANSCRIPTION/DNA                  |
| 2HT2 | STRUCTURE OF THE ESCHERICHIA COLI CLC CHLORIDE CHANNEL Y445H MUTANT AND FAB COMPLEX                                               | MEMBRANE PROTEIN                   |
| 2HT3 | STRUCTURE OF THE ESCHERICHIA COLI CLC CHLORIDE CHANNEL Y445L MUTANT AND FAB COMPLEX                                               | MEMBRANE PROTEIN                   |
| 2HT4 | STRUCTURE OF THE ESCHERICHIA COLI CLC CHLORIDE CHANNEL Y445W MUTANT AND FAB COMPLEX                                               | MEMBRANE PROTEIN                   |
| 2HT9 | THE STRUCTURE OF DIMERIC HUMAN GLUTAREDOXIN 2                                                                                     | OXIDOREDUCTASE                     |
| 2HTH | STRUCTURAL BASIS FOR UBIQUITIN RECOGNITION BY THE HUMAN EAP45/ESCRT-II GLUE DOMAIN                                                | PROTEIN TRANSPORT                  |
| 2HTK | STRUCTURE OF THE ESCHERICHIA COLI CLC CHLORIDE CHANNEL Y445A MUTANT AND FAB COMPLEX                                               | MEMBRANE PROTEIN                   |
| 2HTL | STRUCTURE OF THE ESCHERICHIA COLI CLC CHLORIDE CHANNEL Y445F MUTANT AND FAB COMPLEX                                               | MEMBRANE PROTEIN                   |
| 2HTM | CRYSTAL STRUCTURE OF TTHA0676 FROM THERMUS THERMOPHILUS HB8                                                                       | BIOSYNTHETIC PROTEIN               |
| 2HU2 | CTBP/BARS IN TERNARY COMPLEX WITH NAD(H) AND RRTGAPPAL PEPTIDE                                                                    | OXIDOREDUCTASE                     |
| 2HUE | STRUCTURE OF THE H3-H4 CHAPERONE ASF1 BOUND TO HISTONES H3 AND H4                                                                 | DNA BINDING PROTEIN                |
| 2HV8 | CRYSTAL STRUCTURE OF GTP-BOUND RAB11 IN COMPLEX WITH FIP3                                                                         | PROTEIN TRANSPORT                  |
| 2HVY | CRYSTAL STRUCTURE OF AN H/ACA BOX RNP FROM PYROCOCCUS FURIOSUS                                                                    | ISOMERASE/BIOSYNTHETIC PROTEIN/RNA |
| 2HWL | CRYSTAL STRUCTURE OF THROMBIN IN COMPLEX WITH FIBRINOGEN GAMMA' PEPTIDE                                                           | HYDROLASE                          |
| 2HWN | CRYSTAL STRUCTURE OF RII ALPHA DIMERIZATION/DOCKING DOMAIN OF PKA BOUND TO THE D-AKAP2 PEPTIDE                                    | TRANSFERASE                        |
| 2HWZ | FAB FRAGMENT OF HUMANIZED ANTI-VIRAL ANTIBODY MEDI-493 (SYNAGIS TM)                                                               | IMMUNE SYSTEM                      |
| 2HXF | KIF1A HEAD-MICROTUBULE COMPLEX STRUCTURE IN AMPPNP-FORM                                                                           | TRANSPORT PROTEIN                  |
| 2HXH | KIF1A HEAD-MICROTUBULE COMPLEX STRUCTURE IN ADP-FORM                                                                              | TRANSPORT PROTEIN                  |
| 2HY5 | CRYSTAL STRUCTURE OF DSREFH                                                                                                       | TRANSFERASE                        |



|      |                                                                                                                                                                                                                                              |                                    |
|------|----------------------------------------------------------------------------------------------------------------------------------------------------------------------------------------------------------------------------------------------|------------------------------------|
| 2HYB | CRYSTAL STRUCTURE OF HEXAMERIC DSREFH                                                                                                                                                                                                        | TRANSFERASE                        |
| 2HYE | CRYSTAL STRUCTURE OF THE DDB1-CUL4A-RBX1-SV5V COMPLEX                                                                                                                                                                                        | PROTEIN BINDING                    |
| 2HYI | STRUCTURE OF THE HUMAN EXON JUNCTION COMPLEX WITH A TRAPPED DEAD-BOX HELICASE BOUND TO RNA                                                                                                                                                   | HYDROLASE/RNA BINDING PROTEIN/RNA  |
| 2HZE | CRYSTAL STRUCTURES OF A POXVIRAL GLUTAREDOXIN IN THE OXIDIZED AND REDUCED STATES SHOW REDOX-CORRELATED STRUCTURAL CHANGES                                                                                                                    | ELECTRON TRANSPORT, OXIDOREDUCTASE |
| 2HZM | STRUCTURE OF THE MEDIATOR HEAD SUBCOMPLEX MED18/20                                                                                                                                                                                           | TRANSCRIPTION                      |
| 2HZS | STRUCTURE OF THE MEDIATOR HEAD SUBMODULE MED8C/18/20                                                                                                                                                                                         | TRANSCRIPTION                      |
| 2I04 | X-RAY CRYSTAL STRUCTURE OF MAGI-1 PDZ1 BOUND TO THE C-TERMINAL PEPTIDE OF HPV18 E6                                                                                                                                                           | PEPTIDE BINDING PROTEIN            |
| 2I07 | HUMAN COMPLEMENT COMPONENT C3B                                                                                                                                                                                                               | IMMUNE SYSTEM                      |
| 2I0I | X-RAY CRYSTAL STRUCTURE OF SAP97 PDZ3 BOUND TO THE C-TERMINAL PEPTIDE OF HPV18 E6                                                                                                                                                            | PEPTIDE BINDING PROTEIN            |
| 2I0L | X-RAY CRYSTAL STRUCTURE OF SAP97 PDZ2 BOUND TO THE C-TERMINAL PEPTIDE OF HPV18 E6.                                                                                                                                                           | PEPTIDE BINDING PROTEIN            |
| 2I0Q | CRYSTAL STRUCTURE OF A TELOMERE SINGLE-STRAND DNA-PROTEIN COMPLEX FROM O. NOVA WITH FULL-LENGTH ALPHA AND BETA TELOMERE PROTEINS                                                                                                             | STRUCTURAL PROTEIN/DNA             |
| 2I0R | CRYSTAL STRUCTURE OF AROMATIC AMINE DEHYDROGENASE TTQ-FORMAMIDE ADDUCT                                                                                                                                                                       | OXIDOREDUCTASE                     |
| 2I0S | CRYSTAL STRUCTURE OF AROMATIC AMINE DEHYDROGENASE TTQ-PHENYLACETALDEHYDE ADDUCT                                                                                                                                                              | OXIDOREDUCTASE                     |
| 2I0T | CRYSTAL STRUCTURE OF PHENYLACETALDEHYDE DERIVED R-CARBINOLAMINE ADDUCT OF AROMATIC AMINE DEHYDROGENASE                                                                                                                                       | OXIDOREDUCTASE                     |
| 2I25 | CRYSTAL STRUCTURE ANALYSIS OF THE NURSE SHARK NEW ANTIGEN RECEPTOR PBLA8 VARIABLE DOMAIN IN COMPLEX WITH LYSOZYME                                                                                                                            | IMMUNE SYSTEM                      |
| 2I26 | CRYSTAL STRUCTURE ANALYSIS OF THE NURSE SHARK NEW ANTIGEN RECEPTOR ANCESTRAL VARIABLE DOMAIN IN COMPLEX WITH LYSOZYME                                                                                                                        | IMMUNE SYSTEM                      |
| 2I2P | CRYSTAL STRUCTURE OF RIBOSOME WITH MESSENGER RNA AND THE ANTICODON STEM-LOOP OF P-SITE TRNA. THIS FILE CONTAINS THE 30S SUBUNIT OF ONE 70S RIBOSOME. THE ENTIRE CRYSTAL STRUCTURE CONTAINS TWO 70S RIBOSOMES AND IS DESCRIBED IN REMARK 400. | RIBOSOME                           |
| 2I2R | CRYSTAL STRUCTURE OF THE KCHIP1/KV4.3 T1 COMPLEX                                                                                                                                                                                             | TRANSPORT PROTEIN                  |
| 2I2T | CRYSTAL STRUCTURE OF RIBOSOME WITH MESSENGER RNA AND THE ANTICODON STEM-LOOP OF P-SITE TRNA. THIS FILE CONTAINS THE 50S SUBUNIT OF ONE 70S RIBOSOME. THE ENTIRE CRYSTAL STRUCTURE CONTAINS TWO 70S RIBOSOMES AND IS DESCRIBED IN REMARK 400. | RIBOSOME                           |
| 2I2U | CRYSTAL STRUCTURE OF RIBOSOME WITH MESSENGER RNA AND THE ANTICODON STEM-LOOP OF P-SITE TRNA. THIS FILE CONTAINS THE 30S SUBUNIT OF ONE 70S RIBOSOME. THE ENTIRE CRYSTAL STRUCTURE CONTAINS TWO 70S RIBOSOMES AND IS DESCRIBED IN REMARK 400. | RIBOSOME                           |

|      |                                                                                                                                                                                                                                              |                                   |
|------|----------------------------------------------------------------------------------------------------------------------------------------------------------------------------------------------------------------------------------------------|-----------------------------------|
| 2I2V | CRYSTAL STRUCTURE OF RIBOSOME WITH MESSENGER RNA AND THE ANTICODON STEM-LOOP OF P-SITE TRNA. THIS FILE CONTAINS THE 50S SUBUNIT OF ONE 70S RIBOSOME. THE ENTIRE CRYSTAL STRUCTURE CONTAINS TWO 70S RIBOSOMES AND IS DESCRIBED IN REMARK 400. | RIBOSOME                          |
| 2I2X | CRYSTAL STRUCTURE OF METHANOL:COBALAMIN METHYLTRANSFERASE COMPLEX MTABC FROM METHANOSARCINA BARKERI                                                                                                                                          | TRANSFERASE                       |
| 2I3H | STRUCTURE OF AN ML-IAP/XIAP CHIMERA BOUND TO A 4-MER PEPTIDE (AVPW)                                                                                                                                                                          | INHIBITOR/APOPTOSIS               |
| 2I3S | BUB3 COMPLEX WITH BUB1 GLEBS MOTIF                                                                                                                                                                                                           | CELL CYCLE                        |
| 2I3T | BUB3 COMPLEX WITH MAD3 (BUBR1) GLEBS MOTIF                                                                                                                                                                                                   | CELL CYCLE                        |
| 2I40 | CDK2/CYCLIN A COMPLEXED WITH A THIOPHENE CARBOXAMIDE INHIBITOR                                                                                                                                                                               | TRANSFERASE/CELL CYCLE            |
| 2I5J | CRYSTAL STRUCTURE OF HIV-1 REVERSE TRANSCRIPTASE (RT) IN COMPLEX WITH DHBNH, AN RNASE H INHIBITOR                                                                                                                                            | TRANSFERASE                       |
| 2I5N | 1.96 Å X-RAY STRUCTURE OF PHOTOSYNTHETIC REACTION CENTER FROM RHODOPSEUDOMONAS VIRIDIS:CRYSTALS GROWN BY MICROFLUIDIC TECHNIQUE                                                                                                              | PHOTOSYNTHESIS                    |
| 2I5Y | CRYSTAL STRUCTURE OF CD4M47, A SCORPION-TOXIN MIMIC OF CD4, IN COMPLEX WITH HIV-1 YU2 GP120 ENVELOPE GLYCOPROTEIN AND ANTI-HIV-1 ANTIBODY 17B                                                                                                | VIRUS/VIRAL PROTEIN/IMMUNE SYSTEM |
| 2I60 | CRYSTAL STRUCTURE OF [PHE23]M47, A SCORPION-TOXIN MIMIC OF CD4, IN COMPLEX WITH HIV-1 YU2 GP120 ENVELOPE GLYCOPROTEIN AND ANTI-HIV-1 ANTIBODY 17B                                                                                            | VIRUS/VIRAL PROTEIN/IMMUNE SYSTEM |
| 2I6O | CRYSTAL STRUCTURE OF THE COMPLEX OF THE ARCHAEAL SULFOLOBUS PTP-FOLD PHOSPHATASE WITH PHOSHOPEPTIDES N-G-(P)Y-K-N                                                                                                                            | HYDROLASE                         |
| 2I9B | CRYSTAL STRUCTURE OF ATF-UROKINASE RECEPTOR COMPLEX                                                                                                                                                                                          | HYDROLASE                         |
| 2I9L | STRUCTURE OF FAB 7D11 FROM A NEUTRALIZING ANTIBODY AGAINST THE POXVIRUS L1 PROTEIN                                                                                                                                                           | IMMUNE SYSTEM/VIRAL PROTEIN       |
| 2IAA | CRYSTAL STRUCTURE OF AN ELECTRON TRANSFER COMPLEX BETWEEN AROMATIC AMINE DEHYDROGENASE AND AZURIN FROM ALCALIGENES FAECALIS (FORM 2)                                                                                                         | OXIDOREDUCTASE/ELECTRON TRANSPORT |
| 2IAD | CLASS II MHC I-AD IN COMPLEX WITH AN INFLUENZA HEMAGGLUTININ PEPTIDE 126-138                                                                                                                                                                 | MHC II                            |
| 2IAE | CRYSTAL STRUCTURE OF A PROTEIN PHOSPHATASE 2A (PP2A) HOLOENZYME.                                                                                                                                                                             | HYDROLASE                         |
| 2IAJ | CRYSTAL STRUCTURE OF K103N/Y181C MUTANT HIV-1 REVERSE TRANSCRIPTASE (RT) IN COMPLEX WITH ATP                                                                                                                                                 | TRANSFERASE                       |
| 2IAL | STRUCTURAL BASIS FOR RECOGNITION OF MUTANT SELF BY A TUMOR-SPECIFIC, MHC CLASS II-RESTRICTED TCR                                                                                                                                             | IMMUNE SYSTEM                     |
| 2IAM | STRUCTURAL BASIS FOR RECOGNITION OF MUTANT SELF BY A TUMOR-SPECIFIC, MHC CLASS II-RESTRICTED TCR                                                                                                                                             | IMMUNE SYSTEM                     |
| 2IAN | STRUCTURAL BASIS FOR RECOGNITION OF MUTANT SELF BY A TUMOR-SPECIFIC, MHC CLASS II-RESTRICTED TCR                                                                                                                                             | IMMUNE SYSTEM                     |

|      |                                                                                                                                              |                                      |
|------|----------------------------------------------------------------------------------------------------------------------------------------------|--------------------------------------|
| 2IBF | HUMAN VINCULIN'S HEAD DOMAIN (VH1, RESIDUES 1-258) IN COMPLEX WITH TWO VINCULIN BINDING SITES OF SHIGELLA FLEXNERI'S IPAA (RESIDUES 565-587) | CELL ADHESION, STRUCTURAL PROTEIN    |
| 2IBG | CRYSTAL STRUCTURE OF HEDGEHOG BOUND TO THE FNIII DOMAINS OF IHOG                                                                             | PROTEIN BINDING                      |
| 2IBI | COVALENT UBIQUITIN-USP2 COMPLEX                                                                                                              | HYDROLASE                            |
| 2IBX | INFLUENZA VIRUS (VN1194) H5 HA                                                                                                               | VIRUS/VIRAL PROTEIN                  |
| 2IBZ | YEAST CYTOCHROME BC1 COMPLEX WITH STIGMATELLIN                                                                                               | OXIDOREDUCTASE                       |
| 2IC3 | CRYSTAL STRUCTURE OF K103N/Y181C MUTANT HIV-1 REVERSE TRANSCRIPTASE (RT) IN COMPLEX WITH NONNUCLEOSIDE INHIBITOR HBY 097                     | TRANSFERASE                          |
| 2ICE | CRIG BOUND TO C3C                                                                                                                            | IMMUNE SYSTEM                        |
| 2ICF | CRIG BOUND TO C3B                                                                                                                            | IMMUNE SYSTEM                        |
| 2ICW | CRYSTAL STRUCTURE OF A COMPLETE TERNARY COMPLEX BETWEEN TCR, SUPERANTIGEN, AND PEPTIDE-MHC CLASS II MOLECULE                                 | IMMUNE SYSTEM                        |
| 2ID4 | THE 1.9 Å STRUCTURE OF KEX2 IN COMPLEX WITH AN AC-R-E-R-K-CHLOROMETHYL KETONE INHIBITOR.                                                     | HYDROLASE                            |
| 2IDO | STRUCTURE OF THE E. COLI POL III EPSILON-HOT PROOFREADING COMPLEX                                                                            | TRANSFERASE                          |
| 2IE3 | STRUCTURE OF THE PROTEIN PHOSPHATASE 2A CORE ENZYME BOUND TO TUMOR-INDUCING TOXINS                                                           | SIGNALING PROTEIN, HYDROLASE         |
| 2IE4 | STRUCTURE OF THE PROTEIN PHOSPHATASE 2A CORE ENZYME BOUND TO OKADAIC ACID                                                                    | SIGNALING PROTEIN, HYDROLASE         |
| 2IEJ | HUMAN PROTEIN FARNESYLTRANSFERASE COMPLEXED WITH INHIBITOR COMPOUND STN-48 AND FPP ANALOG AT 1.8 Å RESOLUTION                                | TRANSFERASE                          |
| 2IFF | STRUCTURE OF AN ANTIBODY-LYSOZYME COMPLEX: EFFECT OF A CONSERVATIVE MUTATION                                                                 | IMMUNOGLOBULIN/HYDROLASE(O-GLYCOSYL) |
| 2IFG | STRUCTURE OF THE EXTRACELLULAR SEGMENT OF HUMAN TRKA IN COMPLEX WITH NERVE GROWTH FACTOR                                                     | TRANSFERASE                          |
| 2IFQ | CRYSTAL STRUCTURE OF S-NITROSO THIOREDOXIN                                                                                                   | OXIDOREDUCTASE                       |
| 2IGF | CRYSTAL STRUCTURES OF AN ANTIBODY TO A PEPTIDE AND ITS COMPLEX WITH PEPTIDE ANTIGEN AT 2.8 Å                                                 | IMMUNOGLOBULIN                       |
| 2IH1 | ION SELECTIVITY IN A SEMI-SYNTHETIC K <sup>+</sup> CHANNEL LOCKED IN THE CONDUCTIVE CONFORMATION                                             | MEMBRANE PROTEIN                     |
| 2IH3 | ION SELECTIVITY IN A SEMI-SYNTHETIC K <sup>+</sup> CHANNEL LOCKED IN THE CONDUCTIVE CONFORMATION                                             | MEMBRANE PROTEIN                     |
| 2IHB | CRYSTAL STRUCTURE OF THE HETERODIMERIC COMPLEX OF HUMAN RGS10 AND ACTIVATED G <sub>i</sub> ALPHA 3                                           | SIGNALING PROTEIN                    |
| 2IHS | CRYSTAL STRUCTURE OF THE B30.2/SPRY DOMAIN OF GUSTAVUS IN COMPLEX WITH A 20-RESIDUE VASA PEPTIDE                                             | PEPTIDE BINDING PROTEIN              |
| 2IJ0 | STRUCTURAL BASIS OF T CELL SPECIFICITY AND ACTIVATION BY THE BACTERIAL SUPERANTIGEN TOXIC SHOCK SYNDROME TOXIN-1                             | PROTEIN BINDING                      |

|      |                                                                                                                                                                                                                                   |                                         |
|------|-----------------------------------------------------------------------------------------------------------------------------------------------------------------------------------------------------------------------------------|-----------------------------------------|
| 2IJO | CRYSTAL STRUCTURE OF THE WEST NILE VIRUS NS2B-NS3 PROTEASE COMPLEXED WITH BOVINE PANCREATIC TRYPSIN INHIBITOR                                                                                                                     | HYDROLASE/HYDROLASE INHIBITOR           |
| 2IK8 | CRYSTAL STRUCTURE OF THE HETERODIMERIC COMPLEX OF HUMAN RGS16 AND ACTIVATED G1 ALPHA 1                                                                                                                                            | SIGNALING PROTEIN                       |
| 2ILM | FACTOR INHIBITING HIF-1 ALPHA D201A MUTANT IN COMPLEX WITH FE(II), ALPHA-KETOGLUTARATE AND HIF-1 ALPHA 35MER                                                                                                                      | TRANSCRIPTION REGULATOR, OXIDOREDUCTASE |
| 2ILN | CRYSTAL STRUCTURE OF THE BOWMAN-BIRK INHIBITOR FROM SNAIL MEDIC SEEDS IN COMPLEX WITH BOVINE TRYPSIN                                                                                                                              | HYDROLASE/HYDROLASE INHIBITOR           |
| 2INC | NATIVE TOLUENE/O-XYLENE MONOOXYGENASE HYDROXYLASE X-RAY CRYSTAL STRUCTURE                                                                                                                                                         | OXIDOREDUCTASE                          |
| 2IND | MN(II) RECONSTITUTED TOLUENE/O-XYLENE MONOOXYGENASE HYDROXYLASE X-RAY CRYSTAL STRUCTURE                                                                                                                                           | OXIDOREDUCTASE                          |
| 2INN | STRUCTURE OF THE PHENOL HYDROXYLASE-REGULATORY PROTEIN COMPLEX                                                                                                                                                                    | OXIDOREDUCTASE                          |
| 2INP | STRUCTURE OF THE PHENOL HYDROXYLASE-REGULATORY PROTEIN COMPLEX                                                                                                                                                                    | OXIDOREDUCTASE                          |
| 2INS | THE STRUCTURE OF DES-PHE B1 BOVINE INSULIN                                                                                                                                                                                        | HORMONE                                 |
| 2IO0 | CRYSTAL STRUCTURE OF HUMAN SENP2 IN COMPLEX WITH PRESUMO-2                                                                                                                                                                        | PROTEIN BINDING, HYDROLASE              |
| 2IO1 | CRYSTAL STRUCTURE OF HUMAN SENP2 IN COMPLEX WITH PRESUMO-3                                                                                                                                                                        | PROTEIN BINDING, HYDROLASE              |
| 2IO2 | CRYSTAL STRUCTURE OF HUMAN SENP2 IN COMPLEX WITH RANGAP1-SUMO-1                                                                                                                                                                   | PROTEIN BINDING, HYDROLASE              |
| 2IO3 | CRYSTAL STRUCTURE OF HUMAN SENP2 IN COMPLEX WITH RANGAP1-SUMO-2                                                                                                                                                                   | PROTEIN BINDING, HYDROLASE              |
| 2IO4 | CRYSTAL STRUCTURE OF PCNA12 DIMER FROM SULFOLOBUS SOLFATARICUS.                                                                                                                                                                   | DNA BINDING PROTEIN                     |
| 2IO5 | CRYSTAL STRUCTURE OF THE CIA- HISTONE H3-H4 COMPLEX                                                                                                                                                                               | CHAPERONE/STRUCTURAL PROTEIN            |
| 2IOF | CRYSTAL STRUCTURE OF PHOSPHONOACETALDEHYDE HYDROLASE WITH SODIUM BOROHYDRIDE-REDUCED SUBSTRATE INTERMEDIATE                                                                                                                       | HYDROLASE                               |
| 2IOU | MAJOR TROPISM DETERMINANT P1 (MTD-P1) VARIANT COMPLEXED WITH BORDETELLA BROCHISEPTICA VIRULENCE FACTOR PERTACTIN EXTRACELLULAR DOMAIN (PRN-E).                                                                                    | VIRAL PROTEIN/MEMBRANE PROTEIN          |
| 2IPK | CRYSTAL STRUCTURE OF THE MHC CLASS II MOLECULE HLA-DR1 IN COMPLEX WITH THE FLUOROGENIC PEPTIDE, ACPKXVKQNTLKLAT (X=3-[5-(DIMETHYLAMINO)-1,3-DIOXO-1,3-DIHYDRO-2H-ISOINDOL-2-YL]-L-ALANINE) AND THE SUPERANTIGEN, SEC3 VARIANT 3B2 | IMMUNE SYSTEM                           |
| 2IPO | E. COLI ASPARTATE TRANS-CARBAMOYLASE COMPLEXED WITH N-PHOSPHONACETYL-L-ASPARAGINE                                                                                                                                                 | TRANSFERASE                             |
| 2IPP | CRYSTAL STRUCTURE OF THE TETRAGONAL FORM OF HUMAN LIVER CATHEPSIN B                                                                                                                                                               | HYDROLASE                               |
| 2IPT | PFA1 FAB FRAGMENT                                                                                                                                                                                                                 | IMMUNE SYSTEM                           |
| 2IPU | PFA1 FAB FRAGMENT COMPLEXED WITH ABETA 1-8 PEPTIDE                                                                                                                                                                                | IMMUNE SYSTEM                           |
| 2IQ6 | CRYSTAL STRUCTURE OF THE AMINOPEPTIDASE FROM VIBRIO PROTEOLYTICUS IN COMPLEXATION WITH LEUCYL-LEUCYL-LEUCINE.                                                                                                                     | HYDROLASE                               |

|      |                                                                                                                                                           |                                     |
|------|-----------------------------------------------------------------------------------------------------------------------------------------------------------|-------------------------------------|
| 2IQ9 | PFA2 FAB FRAGMENT, TRICLINIC APO FORM                                                                                                                     | IMMUNE SYSTEM                       |
| 2IQA | PFA2 FAB FRAGMENT, MONOCLINIC APO FORM                                                                                                                    | IMMUNE SYSTEM                       |
| 2ISQ | CRYSTAL STRUCTURE OF O-ACETYL SERINE SULFHYDRYLASE FROM ARABIDOPSIS THALIANA IN COMPLEX WITH C-TERMINAL PEPTIDE FROM ARABIDOPSIS SERINE ACETYLTRANSFERASE | TRANSFERASE                         |
| 2ISS | STRUCTURE OF THE PLP SYNTHASE HOLOENZYME FROM THERMOTOGA MARITIMA                                                                                         | LYASE, TRANSFERASE                  |
| 2ITC | POTASSIUM CHANNEL KCSA-FAB COMPLEX IN SODIUM CHLORIDE                                                                                                     | MEMBRANE PROTEIN                    |
| 2ITD | POTASSIUM CHANNEL KCSA-FAB COMPLEX IN BARIUM CHLORIDE                                                                                                     | MEMBRANE PROTEIN                    |
| 2ITK | HUMAN PIN1 BOUND TO D-PEPTIDE                                                                                                                             | ISOMERASE                           |
| 2IUC | STRUCTURE OF ALKALINE PHOSPHATASE FROM THE ANTARCTIC BACTERIUM TAB5                                                                                       | HYDROLASE                           |
| 2IUH | CRYSTAL STRUCTURE OF THE PI3-KINASE P85 N-TERMINAL SH2 DOMAIN IN COMPLEX WITH C-KIT PHOSPHOTYROSYL PEPTIDE                                                | TRANSFERASE                         |
| 2IUI | CRYSTAL STRUCTURE OF THE PI3-KINASE P85 N-TERMINAL SH2 DOMAIN IN COMPLEX WITH PDGFR PHOSPHOTYROSYL PEPTIDE                                                | TRANSFERASE                         |
| 2IUP | CRYSTAL STRUCTURE OF DITHIONITE-REDUCED AROMATIC AMINE DEHYDROGENASE (AADH) FROM ALCALIGENES FAECALIS                                                     | OXIDOREDUCTASE                      |
| 2IUQ | CRYSTAL STRUCTURE OF DITHIONITE-REDUCED AROMATIC AMINE DEHYDROGENASE (AADH) FROM ALCALIGENES FAECALIS IN COMPLEX WITH TRYPTAMINE                          | OXIDOREDUCTASE                      |
| 2IUR | CRYSTAL STRUCTURE OF N-QUINOL FORM OF AROMATIC AMINE DEHYDROGENASE (AADH) FROM ALCALIGENES FAECALIS, FORM A COCRYSTAL                                     | OXIDOREDUCTASE                      |
| 2IUV | CRYSTAL STRUCTURE OF N-QUINOL FORM OF AROMATIC AMINE DEHYDROGENASE (AADH) FROM ALCALIGENES FAECALIS, FORM B                                               | OXIDOREDUCTASE                      |
| 2IV8 | BETA APPENDAGE IN COMPLEX WITH B-ARRESTIN PEPTIDE                                                                                                         | ENDOCYTOSIS/REGULATOR               |
| 2IV9 | B2-APPENDAGE FROM AP2 IN COMPLEX WITH EPS15 PEPTIDE                                                                                                       | ENDOCYTOSIS/REGULATOR               |
| 2IVF | THYL BENZENE DEHYDROGENASE FROM AROMATOLEUM AROMATICUM                                                                                                    | OXIDOREDUCTASE                      |
| 2IVZ | STRUCTURE OF TOLB IN COMPLEX WITH A PEPTIDE OF THE COLICIN E9 T-DOMAIN                                                                                    | PROTEIN TRANSPORT/HYDROLASE COMPLEX |
| 2IW5 | STRUCTURAL BASIS FOR COREST-DEPENDENT DEMETHYLATION OF NUCLEOSOMES BY THE HUMAN LSD1 HISTONE DEMETHYLASE                                                  | OXIDOREDUCTASE/REPRESSOR COMPLEX    |
| 2IW6 | STRUCTURE OF HUMAN THR160-PHOSPHO CDK2-CYCLIN A COMPLEXED WITH A BISANILINOPYRIMIDINE INHIBITOR                                                           | CELL CYCLE COMPLEX                  |
| 2IW8 | STRUCTURE OF HUMAN THR160-PHOSPHO CDK2-CYCLIN A F82H-L83V-H84D MUTANT WITH AN O6-CYCLOHEXYLMETHYLGUANINE INHIBITOR                                        | CELL CYCLE COMPLEX                  |
| 2IW9 | STRUCTURE OF HUMAN THR160-PHOSPHO CDK2-CYCLIN A COMPLEXED WITH A BISANILINOPYRIMIDINE INHIBITOR                                                           | CELL CYCLE COMPLEX                  |
| 2IWB | MECR1 UNBOUND EXTRACELLULAR ANTIBIOTIC-SENSOR DOMAIN.                                                                                                     | ANTIBIOTIC RESISTANCE               |
| 2IWG | COMPLEX BETWEEN THE PRYSPRY DOMAIN OF TRIM21 AND IGG FC                                                                                                   | IMMUNOGLOBULIN DOMAIN               |

|      |                                                                                                                                                                                                               |                                   |
|------|---------------------------------------------------------------------------------------------------------------------------------------------------------------------------------------------------------------|-----------------------------------|
| 2IX2 | CRYSTAL STRUCTURE OF THE HETEROTRIMERIC PCNA FROM SULFOLOBUS SOLFATARICUS                                                                                                                                     | REPLICATION                       |
| 2IX7 | TRUCTURE OF APO-CALMODULIN BOUND TO UNCONVENTIONAL MYOSIN V                                                                                                                                                   | CONTRACTILE PROTEIN/METAL BINDING |
| 2IXP | CRYSTAL STRUCTURE OF THE PP2A PHOSPHATASE ACTIVATOR YPA1 PTPA1 IN COMPLEX WITH MODEL SUBSTRATE                                                                                                                | ISOMERASE                         |
| 2IY0 | SENPI (MUTANT) SUMO1 RANGAP                                                                                                                                                                                   | HYDROLASE/ACTIVATOR COMPLEX       |
| 2IY1 | SENPI (MUTANT) FULL LENGTH SUMO1                                                                                                                                                                              | HYDROLASE/NUCLEAR PROTEIN COMPLEX |
| 2IYB | STRUCTURE OF COMPLEX BETWEEN THE 3RD LIM DOMAIN OF TES AND THE EVH1 DOMAIN OF MENA                                                                                                                            | METAL-BINDING                     |
| 2IYD | SENPI COVALENT COMPLEX WITH SUMO-2                                                                                                                                                                            | HYDROLASE                         |
| 2IZ2 | CRYSTAL STRUCTURE OF THE LIGAND BINDING DOMAIN OF FUSHI TARAZU FACTOR 1 FROM DROSOPHILA MELANOGASTER                                                                                                          | DNA BINDING PROTEIN               |
| 2IZO | STRUCTURE OF AN ARCHAEAL PCNA1-PCNA2-FEN1 COMPLEX                                                                                                                                                             | HYDROLASE                         |
| 2IZV | CRYSTAL STRUCTURE OF SOCS-4 IN COMPLEX WITH ELONGIN-B AND ELONGIN-C AT 2.55A RESOLUTION                                                                                                                       | TRANSCRIPTION                     |
| 2IZX | MOLECULAR BASIS OF AKAP SPECIFICITY FOR PKA REGULATORY SUBUNITS                                                                                                                                               | KINASE                            |
| 2J00 | STRUCTURE OF THE THERMUS THERMOPHILUS 70S RIBOSOME COMPLEXED WITH MRNA, TRNA AND PAROMOMYCIN (PART 1 OF 4). THIS FILE CONTAINS THE 30S SUBUNIT, MRNA, A-, P- AND E-SITE TRNAS AND PAROMOMYCIN FOR MOLECULE I. | RIBOSOME                          |
| 2J01 | STRUCTURE OF THE THERMUS THERMOPHILUS 70S RIBOSOME COMPLEXED WITH MRNA, TRNA AND PAROMOMYCIN (PART 2 OF 4). THIS FILE CONTAINS THE 50S SUBUNIT FROM MOLECULE I.                                               | RIBOSOME                          |
| 2J02 | STRUCTURE OF THE THERMUS THERMOPHILUS 70S RIBOSOME COMPLEXED WITH MRNA, TRNA AND PAROMOMYCIN (PART 3 OF 4) THIS FILE CONTAINS THE 30S SUBUNIT, MRNA, A-, P- AND E-SITE TRNAS AND PAROMOMYCIN FOR MOLECULE II. | RIBOSOME                          |
| 2J03 | STRUCTURE OF THE THERMUS THERMOPHILUS 70S RIBOSOME COMPLEXED WITH MRNA, TRNA AND PAROMOMYCIN (PART 4 OF 4). THIS FILE CONTAINS THE 50S SUBUNIT FROM MOLECULE II.                                              | RIBOSOME                          |
| 2J0M | CRYSTAL STRUCTURE A TWO-CHAIN COMPLEX BETWEEN THE FERM AND KINASE DOMAINS OF FOCAL ADHESION KINASE.                                                                                                           | TRANSFERASE                       |
| 2J0Q | THE CRYSTAL STRUCTURE OF THE EXON JUNCTION COMPLEX AT 3.2 A RESOLUTION                                                                                                                                        | HYDROLASE/RNA                     |
| 2J0S | THE CRYSTAL STRUCTURE OF THE EXON JUNCTION COMPLEX AT 2.2 A RESOLUTION                                                                                                                                        | HYDROLASE/RNA                     |
| 2J0T | CRYSTAL STRUCTURE OF THE CATALYTIC DOMAIN OF MMP-1 IN COMPLEX WITH THE INHIBITORY DOMAIN OF TIMP-1                                                                                                            | HYDROLASE                         |
| 2J0U | THE CRYSTAL STRUCTURE OF EIF4AIII-BARENTSZ COMPLEX AT 3.0 A RESOLUTION                                                                                                                                        | HYDROLASE                         |
| 2J1K | CAV-2 FIBRE HEAD IN COMPLEX WITH CAR D1                                                                                                                                                                       | VIRUS/RECEPTOR COMPLEX            |
| 2J28 | MODEL OF E. COLI SRP BOUND TO 70S RNCS                                                                                                                                                                        | PROTEIN/RNA COMPLEX               |

|      |                                                                                                                                                              |                                    |
|------|--------------------------------------------------------------------------------------------------------------------------------------------------------------|------------------------------------|
| 2J2U | CRYSTAL STRUCTURE OF A HUMAN FACTOR XA INHIBITOR COMPLEX                                                                                                     | HYDROLASE                          |
| 2J2Z | X-RAY STRUCTURE OF THE CHAPERONE PAPD IN COMPLEX WITH THE PILUS TERMINATOR SUBUNIT PAPH AT 2.3 ANGSTROM RESOLUTION                                           | CHAPERONE/SURFACE ACTIVE PROTEIN   |
| 2J30 | THE ROLE OF LOOP BUNDLE HYDROGEN BONDS IN THE MATURATION AND ACTIVITY OF (PRO)CASPAE-3                                                                       | HYDROLASE                          |
| 2J31 | THE ROLE OF LOOP BUNDLE HYDROGEN BONDS IN THE MATURATION AND ACTIVITY OF(PRO)CASPAE-3                                                                        | HYDROLASE                          |
| 2J32 | THE ROLE OF LOOP BUNDLE HYDROGEN BONDS IN THE MATURATION AND ACTIVITY OF(PRO)CASPAE-3                                                                        | HYDROLASE                          |
| 2J33 | THE ROLE OF LOOP BUNDLE HYDROGEN BONDS IN THE MATURATION AND ACTIVITY OF (PRO)CASPAE-3                                                                       | HYDROLASE                          |
| 2J34 | CRYSTAL STRUCTURE OF A HUMAN FACTOR XA INHIBITOR COMPLEX                                                                                                     | HYDROLASE                          |
| 2J37 | MODEL OF MAMMALIAN SRP BOUND TO 80S RNCS                                                                                                                     | RIBOSOME                           |
| 2J38 | CRYSTAL STRUCTURE OF A HUMAN FACTOR XA INHIBITOR COMPLEX                                                                                                     | HYDROLASE                          |
| 2J3F | L-FICOLIN COMPLEXED TO N-ACETYL-D-GALACTOSAMINE                                                                                                              | LECTIN                             |
| 2J3R | THE CRYSTAL STRUCTURE OF THE BET3-TRS31 HETERODIMER.                                                                                                         | VESICLE TRANSPORT                  |
| 2J3W | THE CRYSTAL STRUCTURE OF THE BET3-TRS31-SEDLIN COMPLEX.                                                                                                      | VESICLE TRANSPORT                  |
| 2J4I | CRYSTAL STRUCTURE OF A HUMAN FACTOR XA INHIBITOR COMPLEX                                                                                                     | HYDROLASE                          |
| 2J4U | E.COLI OMPC- CAMEL LACTOFERRIN COMPLEX                                                                                                                       | MEMBRANE PROTEIN/HYDROLASE COMPLEX |
| 2J4W | STRUCTURE OF A PLASMODIUM VIVAX APICAL MEMBRANE ANTIGEN 1-FAB F8.12.19 COMPLEX                                                                               | IMMUNE SYSTEM                      |
| 2J55 | X-RAY REDUCED PARACCOCUS DENITRIFICANS METHYLAMINE DEHYDROGENASE O-QUINONE IN COMPLEX WITH AMICYANIN.                                                        | OXIDOREDUCTASE                     |
| 2J56 | X-RAY REDUCED PARACCOCUS DENITRIFICANS METHYLAMINE DEHYDROGENASE N-SEMIQUINONE IN COMPLEX WITH AMICYANIN.                                                    | OXIDOREDUCTASE                     |
| 2J57 | X-RAY REDUCED PARACCOCUS DENITRIFICANS METHYLAMINE DEHYDROGENASE N-QUINOL IN COMPLEX WITH AMICYANIN.                                                         | OXIDOREDUCTASE                     |
| 2J59 | CRYSTAL STRUCTURE OF THE ARF1:ARHGAP21-ARFBD COMPLEX                                                                                                         | HYDROLASE                          |
| 2J5G | THE NATIVE STRUCTURE OF A BETA-DIKETONE HYDROLASE FROM THE CYANOBACTERIUM ANABAENA SP. PCC 7120                                                              | HYDROLASE                          |
| 2J5I | CRYSTAL STRUCTURE OF HYDROXYCINNAMOYL-COA HYDRATASE-LYASE                                                                                                    | LYASE                              |
| 2J5L | STRUCTURE OF A PLASMODIUM FALCIPARUM APICAL MEMBRANE ANTIGEN 1-FAB F8.12.19 COMPLEX                                                                          | IMMUNE SYSTEM                      |
| 2J6E | CRYSTAL STRUCTURE OF AN AUTOIMMUNE COMPLEX BETWEEN A HUMAN IGM RHEUMATOID FACTOR AND IGG1 FC REVEALS A NOVEL FC EPITOPE AND EVIDENCE FOR AFFINITY MATURATION | IMMUNE SYSTEM                      |
| 2J7A | CRYSTAL STRUCTURE OF CYTOCHROME C NITRITE REDUCTASE NRFHA COMPLEX FROM DESULFOVIBRIO VULGARIS                                                                | OXIDOREDUCTASE                     |
| 2J7P | GMPPNP-STABILIZED NG DOMAIN COMPLEX OF THE SRP GTPASES FFH AND FTSY                                                                                          | SIGNAL RECOGNITION                 |

|      |                                                                                                                                                                 |                             |
|------|-----------------------------------------------------------------------------------------------------------------------------------------------------------------|-----------------------------|
| 2J7Q | CRYSTAL STRUCTURE OF THE UBIQUITIN-SPECIFIC PROTEASE ENCODED BY MURINE CYTOMEGALOVIRUS TEGUMENT PROTEIN M48 IN COMPLEX WITH A UBIQUITIN-BASED SUICIDE SUBSTRATE | HYDROLASE                   |
| 2J7X | STRUCTURE OF ESTRADIOL-BOUND ESTROGEN RECEPTOR BETA LBD IN COMPLEX WITH LXXLL MOTIF FROM NCOA5                                                                  | TRANSCRIPTION               |
| 2J7Y | STRUCTURE OF 17-EPIESTRIOL-BOUND ESTROGEN RECEPTOR BETA LBD IN COMPLEX WITH LXXLL MOTIF FROM NCOA5                                                              | TRANSCRIPTION               |
| 2J88 | HYALURONIDASE IN COMPLEX WITH A MONOCLONAL IGG FAB FRAGMENT                                                                                                     | HYDROLASE                   |
| 2J8C | X-RAY HIGH RESOLUTION STRUCTURE OF THE PHOTOSYNTHETIC REACTION CENTER FROM RB. SPHAEROIDES AT PH 8 IN THE NEUTRAL STATE                                         | ELECTRON TRANSPORT          |
| 2J8D | X-RAY HIGH RESOLUTION STRUCTURE OF THE PHOTOSYNTHETIC REACTION CENTER FROM RB. SPHAEROIDES AT PH 8 IN THE CHARGE-SEPARATED STATE                                | ELECTRON TRANSPORT          |
| 2J8S | DRUG EXPORT PATHWAY OF MULTIDRUG EXPORTER ACRB REVEALED BY DARPIN INHIBITORS                                                                                    | MEMBRANE PROTEIN/COMPLEX    |
| 2J8U | LARGE CDR3A LOOP ALTERATION AS A FUNCTION OF MHC MUTATION.                                                                                                      | IMMUNE SYSTEM               |
| 2J8X | EPSTEIN-BARR VIRUS URACIL-DNA GLYCOSYLASE IN COMPLEX WITH UGI FROM PBS-2                                                                                        | HYDROLASE/INHIBITOR COMPLEX |
| 2J94 | CRYSTAL STRUCTURE OF A HUMAN FACTOR XA INHIBITOR COMPLEX                                                                                                        | HYDROLASE                   |
| 2J95 | CRYSTAL STRUCTURE OF A HUMAN FACTOR XA INHIBITOR COMPLEX                                                                                                        | HYDROLASE                   |
| 2J98 | HUMAN CORONAVIRUS 229E NON STRUCTURAL PROTEIN 9 CYS69ALA MUTANT (NSP9)                                                                                          | RNA-BINDING PROTEIN         |
| 2J9A | BLLAP IN COMPLEX WITH MICROGININ FR1                                                                                                                            | HYDROLASE                   |
| 2J9D | STRUCTURE OF GLNK1 WITH BOUND EFFECTORS INDICATES REGULATORY MECHANISM FOR AMMONIA UPTAKE                                                                       | MEMBRANE TRANSPORT          |
| 2J9F | HUMAN BRANCHED-CHAIN ALPHA-KETOACID DEHYDROGENASE-DECARBOXYLASE E1B                                                                                             | OXIDOREDUCTASE              |
| 2J9J | ATOMIC-RESOLUTION CRYSTAL STRUCTURE OF CHEMICALLY-SYNTHESIZED HIV-1 PROTEASE COMPLEXED WITH INHIBITOR JG-365                                                    | HYDROLASE                   |
| 2J9K | ATOMIC-RESOLUTION CRYSTAL STRUCTURE OF CHEMICALLY-SYNTHESIZED HIV-1 PROTEASE COMPLEXED WITH INHIBITOR MVT-101                                                   | HYDROLASE                   |
| 2J9U | 2 ANGSTROM X-RAY STRUCTURE OF THE YEAST ESCRT-I VPS28 C-TERMINUS IN COMPLEX WITH THE NZF-N DOMAIN FROM ESCRT-II                                                 | PROTEIN TRANSPORT           |
| 2JA5 | CPD LESION CONTAINING RNA POLYMERASE II ELONGATION COMPLEX A                                                                                                    | TRANSFERASE                 |
| 2JA6 | CPD LESION CONTAINING RNA POLYMERASE II ELONGATION COMPLEX B                                                                                                    | TRANSFERASE                 |
| 2JA7 | CPD LESION CONTAINING RNA POLYMERASE II ELONGATION COMPLEX C                                                                                                    | TRANSFERASE                 |
| 2JA8 | CPD LESION CONTAINING RNA POLYMERASE II ELONGATION COMPLEX D                                                                                                    | TRANSFERASE                 |
| 2JAC | GLUTAREDOXIN GRX1P C30S MUTANT FROM YEAST                                                                                                                       | GLUTAREDOXIN                |
| 2JAM | CRYSTAL STRUCTURE OF HUMAN CALMODULIN-DEPENDENT PROTEIN                                                                                                         | TRANSFERASE                 |



## KINASE I G

|      |                                                                                                                            |                             |
|------|----------------------------------------------------------------------------------------------------------------------------|-----------------------------|
| 2JAZ | CRYSTAL STRUCTURE OF THE MUTANT N560D OF THE NUCLEASE DOMAIN OF COLE7 IN COMPLEX WITH IM7                                  | HYDROLASE/INHIBITOR COMPLEX |
| 2JB0 | CRYSTAL STRUCTURE OF THE MUTANT H573A OF THE NUCLEASE DOMAIN OF COLE7 IN COMPLEX WITH IM7                                  | HYDROLASE/INHIBITOR COMPLEX |
| 2JBA | PHOB RESPONSE REGULATOR RECEIVER DOMAIN CONSTITUTIVELY-ACTIVE DOUBLE MUTANT D53A AND Y102C.                                | TRANSCRIPTION               |
| 2JBG | CRYSTAL STRUCTURE OF THE MUTANT N560A OF THE NUCLEASE DOMAIN OF COLE7 IN COMPLEX WITH IM7                                  | HYDROLASE/INHIBITOR COMPLEX |
| 2JBL | PHOTOSYNTHETIC REACTION CENTER FROM BLASTOCHLORIS VIRIDIS                                                                  | ELECTRON TRANSPORT          |
| 2JBU | CRYSTAL STRUCTURE OF HUMAN INSULIN DEGRADING ENZYME COMPLEXED WITH CO-PURIFIED PEPTIDES.                                   | HYDROLASE                   |
| 2JBY | A VIRAL PROTEIN UNEXPECTEDLY MIMICS THE STRUCTURE AND FUNCTION OF PRO-SURVIVAL BCL-2                                       | APOPTOSIS                   |
| 2JCC | AH3 RECOGNITION OF MUTANT HLA-A2 W167A                                                                                     | IMMUNE SYSTEM               |
| 2JD5 | SKY1P BOUND TO NPL3P-DERIVED SUBSTRATE PEPTIDE                                                                             | TRANSFERASE                 |
| 2JDI | GROUND STATE STRUCTURE OF F1-ATPASE FROM BOVINE HEART MITOCHONDRIA (BOVINE F1-ATPASE CRYSTALLISED IN THE ABSENCE OF AZIDE) | HYDROLASE                   |
| 2JDL | STRUCTURE OF C-TERMINAL REGION OF ACIDIC P2 RIBOSOMAL PROTEIN COMPLEXED WITH TRICHOSANTHIN                                 | HYDROLASE                   |
| 2JDO | STRUCTURE OF PKB-BETA (AKT2) COMPLEXED WITH ISOQUINOLINE-5-SULFONIC ACID (2-(2-(4-CHLOROBENZYLOXY) ETHYLAMINO)ETHYL) AMIDE | TRANSFERASE                 |
| 2JDQ | C-TERMINAL DOMAIN OF INFLUENZA A VIRUS POLYMERASE PB2 SUBUNIT IN COMPLEX WITH HUMAN IMPORTIN ALPHA5                        | PROTEIN TRANSPORT           |
| 2JDR | STRUCTURE OF PKB-BETA (AKT2) COMPLEXED WITH THE INHIBITOR A-443654                                                         | TRANSFERASE                 |
| 2JDS | STRUCTURE OF CAMP-DEPENDENT PROTEIN KINASE COMPLEXED WITH A-443654                                                         | TRANSFERASE                 |
| 2JDT | STRUCTURE OF PKA-PKB CHIMERA COMPLEXED WITH ISOQUINOLINE-5-SULFONIC ACID (2-(2-(4-CHLOROBENZYLOXY) ETHYLAMINO)ETHYL) AMIDE | TRANSFERASE                 |
| 2JDV | STRUCTURE OF PKA-PKB CHIMERA COMPLEXED WITH A-443654                                                                       | TRANSFERASE                 |
| 2JE4 | ATOMIC-RESOLUTION CRYSTAL STRUCTURE OF CHEMICALLY-SYNTHESIZED HIV-1 PROTEASE IN COMPLEX WITH JG-365                        | HYDROLASE                   |
| 2JE6 | STRUCTURE OF A 9-SUBUNIT ARCHAEAL EXOSOME                                                                                  | HYDROLASE                   |
| 2JEA | STRUCTURE OF A 9-SUBUNIT ARCHAEAL EXOSOME BOUND TO RNA                                                                     | HYDROLASE                   |
| 2JEB | STRUCTURE OF A 9-SUBUNIT ARCHAEAL EXOSOME BOUND TO MN IONS                                                                 | HYDROLASE                   |
| 2JEL | JEL42 FAB/HPR COMPLEX                                                                                                      | COMPLEX (ANTIBODY/ANTIGEN)  |
| 2JES | PORTAL PROTEIN FROM BACTERIOPHAGE SPP1                                                                                     | VIRAL PROTEIN               |

|      |                                                                                                                                            |                        |
|------|--------------------------------------------------------------------------------------------------------------------------------------------|------------------------|
| 2JET | CRYSTAL STRUCTURE OF A TRYPSIN-LIKE MUTANT (S189D, A226G) CHYMOTRYPSIN.                                                                    | HYDROLASE              |
| 2JF9 | ESTROGEN RECEPTOR ALPHA LBD IN COMPLEX WITH A TAMOXIFEN-SPECIFIC PEPTIDE ANTAGONIST                                                        | TRANSCRIPTION          |
| 2JFA | ESTROGEN RECEPTOR ALPHA LBD IN COMPLEX WITH AN AFFINITY-SELECTED COREPRESSOR PEPTIDE                                                       | TRANSCRIPTION          |
| 2JGB | STRUCTURE OF HUMAN EIF4E HOMOLOGOUS PROTEIN 4EHP WITH M7GTP                                                                                | TRANSLATION            |
| 2JGD | E. COLI 2-OXOGLUTARATE DEHYDROGENASE (E1O)                                                                                                 | OXIDOREDUCTASE         |
| 2JGZ | CRYSTAL STRUCTURE OF PHOSPHO-CDK2 IN COMPLEX WITH CYCLIN B                                                                                 | TRANSFERASE            |
| 2JH0 | HUMAN THROMBIN HIRUGEN INHIBITOR COMPLEX.                                                                                                  | HYDROLASE              |
| 2JH5 | HUMAN THROMBIN HIRUGEN INHIBITOR COMPLEX.                                                                                                  | HYDROLASE              |
| 2JH6 | HUMAN THROMBIN HIRUGEN INHIBITOR COMPLEX.                                                                                                  | HYDROLASE              |
| 2JIX | CRYSTAL STRUCTURE OF ABT-007 FAB FRAGMENT WITH THE SOLUBLE DOMAIN OF EPO RECEPTOR                                                          | RECEPTOR/IMMUNE SYSTEM |
| 2JIY | PHOTOSYNTHETIC REACTION CENTER MUTANT WITH ALA M149 REPLACED WITH TRP (CHAIN M, AM149W)                                                    | PHOTOSYNTHESIS         |
| 2JIZ | THE STRUCTURE OF F1-ATPASE INHIBITED BY RESVERATROL.                                                                                       | HYDROLASE              |
| 2JJ0 | PHOTOSYNTHETIC REACTION CENTER MUTANT WITH ALA M248 REPLACED WITH TRP (CHAIN M, AM248W)                                                    | PHOTOSYNTHESIS         |
| 2JJ1 | THE STRUCTURE OF F1-ATPASE INHIBITED BY PICEATANNOL.                                                                                       | HYDROLASE              |
| 2JJ2 | THE STRUCTURE OF F1-ATPASE INHIBITED BY QUERCETIN.                                                                                         | HYDROLASE              |
| 2JJ4 | THE COMPLEX OF PII AND ACETYLGLUTAMATE KINASE FROM SYNECHOCOCCUS ELONGATUS PCC7942                                                         | TRANSCRIPTION          |
| 2JKG | PLASMODIUM FALCIPARUM PROFILIN                                                                                                             | PROTEIN-BINDING        |
| 2JKI | COMPLEX OF HSP90 N-TERMINAL AND SGT1 CS DOMAIN                                                                                             | CHAPERONE              |
| 2JKR | AP2 CLATHRIN ADAPTOR CORE WITH DILEUCINE PEPTIDE RM( PHOSPHOS)QIKRLLSE                                                                     | ENDOCYTOSIS            |
| 2JKT | AP2 CLATHRIN ADAPTOR CORE WITH CD4 DILEUCINE PEPTIDE RM( PHOSPHOS)EIKRLLSE Q TO E MUTANT                                                   | ENDOCYTOSIS            |
| 2JL5 | INSIGHTS INTO TRANSLATIONAL TERMINATION FROM THE STRUCTURE OF RF2 BOUND TO THE RIBOSOME (PART 1 OF 4). THIS FILE CONTAINS THE 30S SUBUNIT. | RIBOSOME               |
| 2JL6 | INSIGHTS INTO TRANSLATIONAL TERMINATION FROM THE STRUCTURE OF RF2 BOUND TO THE RIBOSOME (PART 2 OF 4). THIS FILE CONTAINS THE 50S SUBUNIT. | RIBOSOME               |
| 2JL7 | INSIGHTS INTO TRANSLATIONAL TERMINATION FROM THE STRUCTURE OF RF2 BOUND TO THE RIBOSOME (PART 3 OF 4). THIS FILE CONTAINS THE 30S SUBUNIT. | RIBOSOME               |
| 2JL8 | INSIGHTS INTO TRANSLATIONAL TERMINATION FROM THE STRUCTURE OF RF2 BOUND TO THE RIBOSOME (PART 4 OF 4). THIS FILE CONTAINS THE 50S SUBUNIT. | RIBOSOME               |

|      |                                                                                                                                                                                         |                               |
|------|-----------------------------------------------------------------------------------------------------------------------------------------------------------------------------------------|-------------------------------|
| 2JM6 | SOLUTION STRUCTURE OF MCL-1 COMPLEXED WITH NOXAB                                                                                                                                        | APOPTOSIS                     |
| 2JOD | PAC1-RSHORT N-TERMINAL EC DOMAIN PACAP(6-38) COMPLEX                                                                                                                                    | SIGNALING PROTEIN             |
| 2JXR | STRUCTURE OF YEAST PROTEINASE A                                                                                                                                                         | COMPLEX (HYDROLASE/INHIBITOR) |
| 2JZN | SOLUTION NMR STRUCTURE OF THE PRODUCTIVE COMPLEX BETWEEN IIMANNOSE AND IIBMANNONE OF THE MANNONE TRANSPORTER OF THE E. COLI PHOSPHOTRANSFERASE SYSTEM                                   | TRANSFERASE                   |
| 2JZO | SOLUTION NMR STRUCTURE OF THE NON-PRODUCTIVE COMPLEX BETWEEN IIMANNOSE AND IIBMANNONE OF THE MANNONE TRANSPORTER OF THE E. COLI PHOSPHOTRANSFERASE SYSTEM                               | TRANSFERASE                   |
| 2K7V |                                                                                                                                                                                         | HYDROLASE (UREA AMIDO)        |
| 2KAU | THE CRYSTAL STRUCTURE OF UREASE FROM KLEBSIELLA AEROGENES AT 2.2 ANGSTROMS RESOLUTION                                                                                                   |                               |
| 2KIN | KINESIN (MONOMERIC) FROM RATTUS NORVEGICUS                                                                                                                                              | MOTOR PROTEIN                 |
| 2MCP | REFINED CRYSTAL STRUCTURE OF THE MC/PC603 FAB-PHOSPHOCHOLINE COMPLEX AT 3.1 ANGSTROMS RESOLUTION                                                                                        | IMMUNOGLOBULIN                |
| 2MHA | CRYSTAL STRUCTURE OF THE MAJOR HISTOCOMPATIBILITY COMPLEX CLASS I H-2KB MOLECULE CONTAINING A SINGLE VIRAL PEPTIDE: IMPLICATIONS FOR PEPTIDE BINDING AND T-CELL RECEPTOR RECOGNITION    | HISTOCOMPATIBILITY ANTIGEN    |
| 2MHB | THE STRUCTURE OF HORSE METHAEMOGLOBIN AT 2.0 ANGSTROMS RESOLUTION                                                                                                                       | OXYGEN TRANSPORT              |
| 2MIN | NITROGENASE MOFE PROTEIN FROM AZOTOBACTER VINELANDII, OXIDIZED STATE                                                                                                                    | NITROGEN FIXATION             |
| 2MIP | CRYSTAL STRUCTURE OF HUMAN IMMUNODEFICIENCY VIRUS (HIV) TYPE 2 PROTEASE IN COMPLEX WITH A REDUCED AMIDE INHIBITOR AND COMPARISON WITH HIV-1 PROTEASE STRUCTURES                         | HYDROLASE (ACID PROTEINASE)   |
| 2MLL | MISTLETOE LECTIN I FROM VISCUM ALBUM                                                                                                                                                    | RIBOSOME                      |
| 2MPA | BACTERICIDAL ANTIBODY AGAINST NEISSERIA MENINGITIDIS                                                                                                                                    | IMMUNE SYSTEM                 |
| 2NGR | TRANSITION STATE COMPLEX FOR GTP HYDROLYSIS BY CDC42: COMPARISONS OF THE HIGH RESOLUTION STRUCTURES FOR CDC42 BOUND TO THE ACTIVE AND CATALYTICALLY COMPROMISED FORMS OF THE CDC42-GAP. | HYDROLASE                     |
| 2NL9 | CRYSTAL STRUCTURE OF THE MCL-1:BIM BH3 COMPLEX                                                                                                                                          | APOPTOSIS                     |
| 2NLA | CRYSTAL STRUCTURE OF THE MCL-1:MNOXAB BH3 COMPLEX                                                                                                                                       | APOPTOSIS                     |
| 2NLJ | POTASSIUM CHANNEL KCSA(M96V)-FAB COMPLEX IN KCL                                                                                                                                         | MEMBRANE PROTEIN              |
| 2NM1 | STRUCTURE OF BONT/B IN COMPLEX WITH ITS PROTEIN RECEPTOR                                                                                                                                | TOXIN, HYDROLASE              |
| 2NMV | DAMAGE DETECTION BY THE UVRABC PATHWAY: CRYSTAL STRUCTURE OF UVRB BOUND TO FLUORESCHEIN-ADDUCTED DNA                                                                                    | HYDROLASE/DNA                 |
| 2NN6 | STRUCTURE OF THE HUMAN RNA EXOSOME COMPOSED OF RRP41, RRP45, RRP46, RRP43, MTR3, RRP42, CSL4, RRP4, AND RRP40                                                                           | HYDROLASE/TRANSFERASE         |
| 2NNA | STRUCTURE OF THE MHC CLASS II MOLECULE HLA-DQ8 BOUND WITH A DEAMIDATED GLUTEN PEPTIDE                                                                                                   | IMMUNE SYSTEM                 |
| 2NNU | CRYSTAL STRUCTURE OF THE PAPILLOMAVIRUS DNA TETHERING                                                                                                                                   | TRANSCRIPTION                 |

| COMPLEX E2:BRD4 |                                                                                                                                                                                              |                                     |
|-----------------|----------------------------------------------------------------------------------------------------------------------------------------------------------------------------------------------|-------------------------------------|
| 2NNW            | ALTERNATIVE CONFORMATIONS OF NOP56/58-FIBRILLARIN COMPLEX AND IMPLICATION FOR INDUCED-FIT ASSEMBLY OF BOX C/D RNPS                                                                           | TRANSFERASE                         |
| 2NO3            | NOVEL 4-ANILINOPYRIMIDINES AS POTENT JNK1 INHIBITORS                                                                                                                                         | SIGNALING PROTEIN/INHIBITOR         |
| 2NOJ            | CRYSTAL STRUCTURE OF EHP / C3D COMPLEX                                                                                                                                                       | IMMUNE SYSTEM                       |
| 2NP0            | CRYSTAL STRUCTURE OF THE BOTULINUM NEUROTOXIN TYPE B COMPLEXED WITH SYNAPTOTAGMIN-II ECTODOMAIN                                                                                              | HYDROLASE                           |
| 2NPA            | THE CRYSTAL STRUCTURE OF THE HUMAN PPAR $\alpha$ LIGAND BINDING DOMAIN IN COMPLEX WITH $\alpha$ -HYDROXYIMINO PHENYLPROPANOIC ACID                                                           | TRANSCRIPTION                       |
| 2NPH            | CRYSTAL STRUCTURE OF HIV1 PROTEASE IN SITU PRODUCT COMPLEX                                                                                                                                   | HYDROLASE                           |
| 2NPI            | CLP1-ATP-PCF11 COMPLEX                                                                                                                                                                       | TRANSCRIPTION                       |
| 2NPM            | CRYSTAL STRUCTURE OF CRYPTOSPORIDIUM PARVUM 14-3-3 PROTEIN IN COMPLEX WITH PEPTIDE                                                                                                           | PROTEIN BINDING                     |
| 2NPP            | STRUCTURE OF THE PROTEIN PHOSPHATASE 2A HOLOENZYME                                                                                                                                           | SIGNALING PROTEIN, HYDROLASE        |
| 2NPS            | CRYSTAL STRUCTURE OF THE EARLY ENDOSOMAL SNARE COMPLEX                                                                                                                                       | TRANSPORT PROTEIN                   |
| 2NPT            | CRYSTAL STRUCTURE OF THE COMPLEX OF HUMAN MITOGEN ACTIVATED PROTEIN KINASE KINASE 5 PHOX DOMAIN (MAP2K5-PHOX) WITH HUMAN MITOGEN ACTIVATED PROTEIN KINASE KINASE 2 PHOX DOMAIN (MAP3K2-PHOX) | TRANSFERASE                         |
| 2NQ8            | MALARIAL ENOYL ACYL ACP REDUCTASE BOUND WITH INH-NAD ADDUCT                                                                                                                                  | OXIDOREDUCTASE                      |
| 2NQA            | CATALYTIC DOMAIN OF HUMAN CALPAIN 8                                                                                                                                                          | HYDROLASE/HYDROLASE INHIBITOR       |
| 2NQB            | DROSOPHILA NUCLEOSOME STRUCTURE                                                                                                                                                              | STRUCTURAL PROTEIN/DNA              |
| 2NQD            | CRYSTAL STRUCTURE OF CYSTEINE PROTEASE INHIBITOR, CHAGASIN, IN COMPLEX WITH HUMAN CATHEPSIN L                                                                                                | HYDROLASE INHIBITOR/HYDROLASE       |
| 2NQO            | CRYSTAL STRUCTURE OF HELICOBACTER PYLORI GAMMA-GLUTAMYLTRANSPEPTIDASE                                                                                                                        | TRANSFERASE                         |
| 2NR6            | CRYSTAL STRUCTURE OF THE COMPLEX OF ANTIBODY AND THE ALLERGEN BLA G 2                                                                                                                        | HYDROLASE/IMMUNE SYSTEM             |
| 2NS1            | CRYSTAL STRUCTURE OF THE E. COLI AMMONIA CHANNEL AMTB COMPLEXED WITH THE SIGNAL TRANSDUCTION PROTEIN GLNK                                                                                    | TRANSPORT PROTEIN/SIGNALING PROTEIN |
| 2NS8            | HOW AN IN VITRO SELECTED PEPTIDE MIMICS THE ANTIBIOTIC TETRACYCLINE TO INDUCE TET REPRESSOR                                                                                                  | TRANSCRIPTION                       |
| 2NTF            | CRYSTAL STRUCTURE OF A QUORUM-QUENCHING ANTIBODY IN COMPLEX WITH AN N-ACYL-L-HOMOSERINE LACTONE ANALOG                                                                                       | IMMUNE SYSTEM                       |
| 2NTI            | CRYSTAL STRUCTURE OF PCNA123 HETEROTRIMER.                                                                                                                                                   | DNA BINDING PROTEIN                 |
| 2NTS            | CRYSTAL STRUCTURE OF SEK-HVB5.1                                                                                                                                                              | TOXIN/IMMUNE SYSTEM                 |
| 2NTY            | ROP4-GDP-PRONE8                                                                                                                                                                              | SIGNALING PROTEIN                   |
| 2NU0            | MOLECULAR STRUCTURES OF THE COMPLEXES OF SGPB WITH OMTKY3 AROMATIC P1 VARIANTS TRP181, HIS181, PHE181, AND TYR181                                                                            | HYDROLASE                           |
|                 |                                                                                                                                                                                              | HYDROLASE                           |

|      |                                                                                                                                                                |                                     |
|------|----------------------------------------------------------------------------------------------------------------------------------------------------------------|-------------------------------------|
| 2NU1 | MOLECULAR STRUCTURES OF THE COMPLEXES OF SGPB WITH OMTKY3 AROMATIC P1 VARIANTS TRP18I, HIS18I, PHE18I AND TYR18I                                               | HYDROLASE                           |
| 2NU2 | ACCOMMODATION OF POSITIVELY-CHARGED RESIDUES IN A HYDROPHOBIC SPECIFICITY POCKET: CRYSTAL STRUCTURES OF SGPB IN COMPLEX WITH OMTKY3 VARIANTS LYS18I AND ARG18I | HYDROLASE                           |
| 2NU3 | ACCOMMODATION OF POSITIVELY-CHARGED RESIDUES IN A HYDROPHOBIC SPECIFICITY POCKET: CRYSTAL STRUCTURES OF SGPB IN COMPLEX WITH OMTKY3 VARIANTS LYS18I AND ARG18I | HYDROLASE                           |
| 2NU4 | ACCOMMODATION OF POSITIVELY-CHARGED RESIDUES IN A HYDROPHOBIC SPECIFICITY POCKET: CRYSTAL STRUCTURES OF SGPB IN COMPLEX WITH OMTKY3 VARIANTS LYS18I AND ARG18I | LIGASE                              |
| 2NU6 | C123AA MUTANT OF E. COLI SUCCINYL-COA SYNTHETASE                                                                                                               | LIGASE                              |
| 2NU7 | C123AS MUTANT OF E. COLI SUCCINYL-COA SYNTHETASE                                                                                                               | LIGASE                              |
| 2NU8 | C123AT MUTANT OF E. COLI SUCCINYL-COA SYNTHETASE                                                                                                               | LIGASE                              |
| 2NU9 | C123AT MUTANT OF E. COLI SUCCINYL-COA SYNTHETASE ORTHORHOMBIC CRYSTAL FORM                                                                                     | LIGASE                              |
| 2NUA | C123AV MUTANT OF E. COLI SUCCINYL-COA SYNTHETASE                                                                                                               | TOXIN/PROTEIN BINDING               |
| 2NUD | THE STRUCTURE OF THE TYPE III EFFECTOR AVR <sub>B</sub> COMPLEXED WITH A HIGH-AFFINITY RIN4 PEPTIDE                                                            | PROTEIN TRANSPORT                   |
| 2NUP | CRYSTAL STRUCTURE OF THE HUMAN SEC23A/24A HETERODIMER, COMPLEXED WITH THE SNARE PROTEIN SEC22B                                                                 | PROTEIN TRANSPORT                   |
| 2NUT | CRYSTAL STRUCTURE OF THE HUMAN SEC23A/24A HETERODIMER, COMPLEXED WITH THE SNARE PROTEIN SEC22B                                                                 | TRANSPORT PROTEIN/SIGNALING PROTEIN |
| 2NUU | REGULATING THE ESCHERICHIA COLI AMMONIA CHANNEL: THE CRYSTAL STRUCTURE OF THE AMTB-GLNK COMPLEX                                                                | LYASE/TRANSFERASE                   |
| 2NV2 | STRUCTURE OF THE PLP SYNTHASE COMPLEX PDX1/2 (YAAD/E) FROM BACILLUS SUBTILIS                                                                                   | TRANSCRIPTION                       |
| 2NV7 | CRYSTAL STRUCTURE OF ESTROGEN RECEPTOR BETA COMPLEXED WITH WAY-555                                                                                             | TRANSCRIPTION/DNA/RNA               |
| 2NVQ | RNA POLYMERASE II ELONGATION COMPLEX IN 150 MM MG+2 WITH 2'DUTP                                                                                                | TRANSCRIPTION/DNA/RNA               |
| 2NVT | RNA POLYMERASE II ELONGATION COMPLEX IN 150 MM MG+2 WITH GMPCPP                                                                                                | PROTEIN TURNOVER, LIGASE            |
| 2NVU | STRUCTURE OF APPBP1-UBA3~NEDD8-NEDD8-MGATP-UBC12(C111A), A TRAPPED UBIQUITIN-LIKE PROTEIN ACTIVATION COMPLEX                                                   | TRANSCRIPTION/DNA/RNA               |
| 2NVX | RNA POLYMERASE II ELONGATION COMPLEX IN 5 MM MG+2 WITH 2'-DUTP                                                                                                 | TRANSCRIPTION                       |
| 2NVY | RNA POLYMERASE II FORM II IN 150 MM MN+2                                                                                                                       | TRANSCRIPTION/DNA/RNA               |
| 2NVZ | RNA POLYMERASE II ELONGATION COMPLEX WITH UTP, UPDATED 11/2006                                                                                                 | IMMUNE SYSTEM                       |
| 2NW2 | CRYSTAL STRUCTURE OF ELS4 TCR AT 1.4A                                                                                                                          | IMMUNE SYSTEM                       |
| 2NW3 | CRYSTAL STRUCTURE OF HLA-B*3508 PRESENTING EBV PEPTIDE EPLPQGQLTAY AT 1.7A                                                                                     |                                     |

|      |                                                                                                                                                                                  |                               |
|------|----------------------------------------------------------------------------------------------------------------------------------------------------------------------------------|-------------------------------|
| 2NWN | NEW PHARMACOPHORE FOR SERINE PROTEASE INHIBITION REVEALED BY CRYSTAL STRUCTURE OF HUMAN UROKINASE-TYPE PLASMINOGEN ACTIVATOR COMPLEXED WITH A CYCLIC PEPTIDYL INHIBITOR, UPAIN-1 | HYDROLASE                     |
| 2NX5 | CRYSTAL STRUCTURE OF ELS4 TCR BOUND TO HLA-B*3508 PRESENTING EBV PEPTIDE EPLPQGQLTAY AT 1.7A                                                                                     | IMMUNE SYSTEM                 |
| 2NXD | STRUCTURE OF HIV-1 PROTEASE D25N COMPLEXED WITH RT-RH ANALOGUE PEPTIDE GLY-ALA-ASP-ILE-PHE*TYR-LEU-ASP-GLY-ALA                                                                   | HYDROLASE/HYDROLASE SUBSTRATE |
| 2NXL | STRUCTURE OF HIV-1 PROTEASE D25N COMPLEXED WITH THE RT-RH ANALOGUE PEPTIDE GLY-ALA-GLU-VAL-PHE*TYR-VAL-ASP-GLY-ALA                                                               | HYDROLASE/HYDROLASE SUBSTRATE |
| 2NXM | STRUCTURE OF HIV-1 PROTEASE D25N COMPLEXED WITH THE RT-RH ANALOGUE PEPTIDE GLY-ALA-GLN-THR-PHE*TYR-VAL-ASP-GLY-ALA                                                               | HYDROLASE/HYDROLASE SUBSTRATE |
| 2NXN | T. THERMOPHILUS RIBOSOMAL PROTEIN L11 METHYLTRANSFERASE (PRMA) IN COMPLEX WITH RIBOSOMAL PROTEIN L11                                                                             | TRANSFERASE                   |
| 2NXX | CRYSTAL STRUCTURE OF THE LIGAND-BINDING DOMAINS OF THE T.CASTANEUM (COLEOPTERA) HETERODIMER ECRUSP BOUND TO PONASTERONE A                                                        | HORMONE/GROWTH FACTOR         |
| 2NXY | HIV-1 GP120 ENVELOPE GLYCOPROTEIN(S334A) COMPLEXED WITH CD4 AND ANTIBODY 17B                                                                                                     | VIRAL PROTEIN/IMMUNE SYSTEM   |
| 2NXZ | HIV-1 GP120 ENVELOPE GLYCOPROTEIN (T257S, S334A, S375W) COMPLEXED WITH CD4 AND ANTIBODY 17B                                                                                      | VIRAL PROTEIN/IMMUNE SYSTEM   |
| 2NY0 | HIV-1 GP120 ENVELOPE GLYCOPROTEIN (M95W, W96C, T257S, V275C, S334A, S375W, A433M) COMPLEXED WITH CD4 AND ANTIBODY 17B                                                            | VIRAL PROTEIN/IMMUNE SYSTEM   |
| 2NY1 | HIV-1 GP120 ENVELOPE GLYCOPROTEIN (I109C, T257S, S334A, S375W, Q428C) COMPLEXED WITH CD4 AND ANTIBODY 17B                                                                        | VIRAL PROTEIN/IMMUNE SYSTEM   |
| 2NY2 | HIV-1 GP120 ENVELOPE GLYCOPROTEIN (T123C, T257S, S334A, S375W, G431C) COMPLEXED WITH CD4 AND ANTIBODY 17B                                                                        | VIRAL PROTEIN/IMMUNE SYSTEM   |
| 2NY3 | HIV-1 GP120 ENVELOPE GLYCOPROTEIN (K231C, T257S, E267C, S334A, S375W) COMPLEXED WITH CD4 AND ANTIBODY 17B                                                                        | VIRAL PROTEIN/IMMUNE SYSTEM   |
| 2NY4 | HIV-1 GP120 ENVELOPE GLYCOPROTEIN (K231C, T257S, E268C, S334A, S375W) COMPLEXED WITH CD4 AND ANTIBODY 17B                                                                        | VIRAL PROTEIN/IMMUNE SYSTEM   |
| 2NY5 | HIV-1 GP120 ENVELOPE GLYCOPROTEIN (M95W, W96C, I109C, T257S, V275C, S334A, S375W, Q428C, A433M) COMPLEXED WITH CD4 AND ANTIBODY 17B                                              | VIRAL PROTEIN/IMMUNE SYSTEM   |
| 2NY6 | HIV-1 GP120 ENVELOPE GLYCOPROTEIN (M95W, W96C, I109C, T123C, T257S, V275C, S334A, S375W, Q428C, G431C) COMPLEXED WITH CD4 AND ANTIBODY 17B                                       | VIRAL PROTEIN/IMMUNE SYSTEM   |
| 2NY7 | HIV-1 GP120 ENVELOPE GLYCOPROTEIN COMPLEXED WITH THE BROADLY NEUTRALIZING CD4-BINDING-SITE ANTIBODY B12                                                                          | VIRAL PROTEIN/IMMUNE SYSTEM   |
| 2NYL | CRYSTAL STRUCTURE OF PROTEIN PHOSPHATASE 2A (PP2A) HOLOENZYME WITH THE CATALYTIC SUBUNIT CARBOXYL TERMINUS TRUNCATED                                                             | HYDROLASE                     |
| 2NYM | CRYSTAL STRUCTURE OF PROTEIN PHOSPHATASE 2A (PP2A) WITH C-TERMINUS TRUNCATED CATALYTIC SUBUNIT                                                                                   | HYDROLASE                     |
| 2NYQ | STRUCTURE OF VIBRIO PROTEOLYTICUS AMINOPEPTIDASE WITH A                                                                                                                          | HYDROLASE                     |

| BOUND TRP FRAGMENT OF DLWCF |                                                                                                                                                                                          |                                |
|-----------------------------|------------------------------------------------------------------------------------------------------------------------------------------------------------------------------------------|--------------------------------|
| 2NYY                        | CRYSTAL STRUCTURE OF BOTULINUM NEUROTOXIN TYPE A COMPLEXED WITH MONOCLONAL ANTIBODY CR1                                                                                                  | TOXIN/IMMUNE SYSTEM            |
| 2NYZ                        | VIRAL CHEMOKINE BINDING PROTEIN M3 FROM MURINE GAMMAHERPESVIRUS68 IN COMPLEX WITH THE C- CHEMOKINE XCL1                                                                                  | VIRAL PROTEIN/CYTOKINE         |
| 2NZ0                        | CRYSTAL STRUCTURE OF POTASSIUM CHANNEL KV4.3 IN COMPLEX WITH ITS REGULATORY SUBUNIT KCHIP1 (CASP TARGET)                                                                                 | MEMBRANE PROTEIN               |
| 2NZ1                        | VIRAL CHEMOKINE BINDING PROTEIN M3 FROM MURINE GAMMAHERPESVIRUS68 IN COMPLEX WITH THE CC-CHEMOKINE CCL2/MCP-1                                                                            | VIRAL PROTEIN/CYTOKINE         |
| 2NZ8                        | N-TERMINAL DHPH CASSETTE OF TRIO IN COMPLEX WITH NUCLEOTIDE-FREE RAC1                                                                                                                    | SIGNALING PROTEIN,CELL CYCLE   |
| 2NZ9                        | CRYSTAL STRUCTURE OF BOTULINUM NEUROTOXIN TYPE A COMPLEXED WITH MONOCLONAL ANTIBODY AR2                                                                                                  | TOXIN/IMMUNE SYSTEM            |
| 2NZD                        | NUCLEOSOME CORE PARTICLE CONTAINING 145 BP OF DNA                                                                                                                                        | STRUCTURAL PROTEIN/DNA         |
| 2NZU                        | STRUCTURAL MECHANISM FOR THE FINE-TUNING OF CCPA FUNCTION BY THE SMALL MOLECULE EFFECTORS G6P AND FBP                                                                                    | TRANSCRIPTION                  |
| 2NZV                        | STRUCTURAL MECHANISM FOR THE FINE-TUNING OF CCPA FUNCTION BY THE SMALL MOLECULE EFFECTORS G6P AND FBP                                                                                    | TRANSCRIPTION                  |
| 2O01                        | THE STRUCTURE OF A PLANT PHOTOSYSTEM I SUPERCOMPLEX AT 3.4 ANGSTROM RESOLUTION                                                                                                           | PHOTOSYNTHESIS                 |
| 2O02                        | PHOSPHORYLATION INDEPENDENT INTERACTIONS BETWEEN 14-3-3 AND EXOENZYME S: FROM STRUCTURE TO PATHOGENESIS                                                                                  | PROTEIN BINDING/TOXIN          |
| 2O1N                        | CRYSTAL STRUCTURE OF A COMPLEX OF PHOSPHOLIPASE A2 WITH A PEPTIDE ALA-ILE-ALA-SER AT 2.8 A RESOLUTION                                                                                    | HYDROLASE                      |
| 2O1R                        | STRUCTURAL GENOMICS, THE CRYSTAL STRUCTURE OF A CONSERVED PUTATIVE PROTEIN FROM HAEMOPHILUS INFLUENZAE RD KW20                                                                           | MEMBRANE PROTEIN               |
| 2O25                        | UBIQUITIN-CONJUGATING ENZYME E2-25 KDA COMPLEXED WITH SUMO-1-CONJUGATING ENZYME UBC9                                                                                                     | LIGASE                         |
| 2O26                        | STRUCTURE OF A CLASS III RTK SIGNALING ASSEMBLY                                                                                                                                          | CYTOKINE/SIGNALING PROTEIN     |
| 2O2V                        | CRYSTAL STRUCTURE OF THE COMPLEX OF HUMAN MITOGEN ACTIVATED PROTEIN KINASE KINASE 5 PHOX DOMAIN (MAP2K5-PHOX) WITH HUMAN MITOGEN ACTIVATED PROTEIN KINASE KINASE KINASE 3 (MAP3K3B-PHOX) | TRANSFERASE                    |
| 2O3B                        | CRYSTAL STRUCTURE COMPLEX OF NUCLEASE A (NUCA) WITH INTRACELLULAR INHIBITOR NU1A                                                                                                         | HYDROLASE/HYDROLASE INHIBITOR  |
| 2O4J                        | CRYSTAL STRUCTURE OF RAT VITAMIN D RECEPTOR LIGAND BINDING DOMAIN COMPLEXED WITH VITIII 17-20Z AND THE NR2 BOX OF DRIP 205                                                               | HORMONE/GROWTH FACTOR RECEPTOR |
| 2O4R                        | CRYSTAL STRUCTURE OF RAT VITAMIN D RECEPTOR LIGAND BINDING DOMAIN COMPLEXED WITH VITIII 17-20E AND THE NR2 BOX OF DRIP 205                                                               | HORMONE/GROWTH FACTOR RECEPTOR |
| 2O4X                        | CRYSTAL STRUCTURE OF HUMAN P100 TUDOR DOMAIN                                                                                                                                             | HYDROLASE                      |
| 2O5G                        | CALMODULIN-SMOOTH MUSCLE LIGHT CHAIN KINASE PEPTIDE COMPLEX                                                                                                                              | METAL BINDING PROTEIN          |

|      |                                                                                                                  |                         |
|------|------------------------------------------------------------------------------------------------------------------|-------------------------|
| 2O5I | CRYSTAL STRUCTURE OF THE T. THERMOPHILUS RNA POLYMERASE ELONGATION COMPLEX                                       | TRANSFERASE/DNA/RNA     |
| 2O5J | CRYSTAL STRUCTURE OF THE T. THERMOPHILUS RNAP POLYMERASE ELONGATION COMPLEX WITH THE NTP SUBSTRATE ANALOG        | TRANSFERASE/DNA/RNA     |
| 2O5X | CRYSTAL STRUCTURE OF 1E9 LEUH47TRP/ARGH100TRP, AN ENGINEERED DIELS-ALDERASE FAB WITH NM STEROID-BINDING AFFINITY | IMMUNE SYSTEM           |
| 2O5Y | CRYSTAL STRUCTURE OF THE 1E9 LEUH47TRP/ARGH100TRP FAB PROGESTERONE COMPLEX                                       | IMMUNE SYSTEM           |
| 2O5Z | CRYSTAL STRUCTURE OF THE 1E9 LEUH47TRP/ARGH100TRP FAB 5-BETA-ANDROSTANE-3,17-DIONE COMPLEX                       | IMMUNE SYSTEM           |
| 2O60 | CALMODULIN BOUND TO PEPTIDE FROM NEURONAL NITRIC OXIDE SYNTHASE                                                  | METAL BINDING PROTEIN   |
| 2O6V | CRYSTAL STRUCTURE AND SOLUTION NMR STUDIES OF LYS48-LINKED TETRAUBIQUITIN AT NEUTRAL PH                          | SIGNALING PROTEIN       |
| 2O8A | RAT PP1CGAMMA COMPLEXED WITH MOUSE INHIBITOR-2                                                                   | HYDROLASE/INHIBITOR     |
| 2O8B | HUMAN MUTSALPHA (MSH2/MSH6) BOUND TO ADP AND A G T MISPAIR                                                       | DNA BINDING PROTEIN/DNA |
| 2O8C | HUMAN MUTSALPHA (MSH2/MSH6) BOUND TO ADP AND AN O6-METHYL-GUANINE T MISPAIR                                      | DNA BINDING PROTEIN/DNA |
| 2O8D | HUMAN MUTSALPHA (MSH2/MSH6) BOUND TO ADP AND A G DU MISPAIR                                                      | DNA BINDING PROTEIN/DNA |
| 2O8E | HUMAN MUTSALPHA (MSH2/MSH6) BOUND TO A G T MISPAIR, WITH ADP BOUND TO MSH2 ONLY                                  | DNA BINDING PROTEIN/DNA |
| 2O8F | HUMAN MUTSALPHA (MSH2/MSH6) BOUND TO DNA WITH A SINGLE BASE T INSERT                                             | DNA BINDING PROTEIN/DNA |
| 2O8G | RAT PP1C GAMMA COMPLEXED WITH MOUSE INHIBITOR-2                                                                  | HYDROLASE/INHIBITOR     |
| 2O8M | CRYSTAL STRUCTURE OF THE S139A MUTANT OF HEPATITIS C VIRUS NS3/4A PROTEASE                                       | VIRAL PROTEIN           |
| 2O8V | PAPS REDUCTASE IN A COVALENT COMPLEX WITH THIOREDOXIN C35A                                                       | OXIDOREDUCTASE          |
| 2O97 | CRYSTAL STRUCTURE OF E. COLI HU HETERODIMER                                                                      | DNA BINDING PROTEIN     |
| 2O98 | STRUCTURE OF THE 14-3-3 / H <sup>+</sup> -ATPASE PLANT COMPLEX                                                   | PROTEIN BINDING         |
| 2O9I | CRYSTAL STRUCTURE OF THE HUMAN PREGNANE X RECEPTOR LBD IN COMPLEX WITH AN SRC-1 COACTIVATOR PEPTIDE AND T0901317 | TRANSCRIPTION           |
| 2OBH | CENTRIN-XPC PEPTIDE                                                                                              | CELL CYCLE              |
| 2OBO | DISCOVERY OF THE HCV NS3/4A PROTEASE INHIBITOR SCH503034. KEY STEPS IN STRUCTURE-BASED OPTIMIZATION              | VIRAL PROTEIN           |
| 2OBQ | DISCOVERY OF THE HCV NS3/4A PROTEASE INHIBITOR SCH503034. KEY STEPS IN STRUCTURE-BASED OPTIMIZATION              | VIRAL PROTEIN           |
| 2OC0 | STRUCTURE OF NS3 COMPLEXED WITH A KETOAMIDE INHIBITOR SCH491762                                                  | VIRAL PROTEIN           |
| 2OC1 | STRUCTURE OF THE HCV NS3/4A PROTEASE INHIBITOR CVS4819                                                           | VIRAL PROTEIN           |



|      |                                                                                                                                             |                                         |
|------|---------------------------------------------------------------------------------------------------------------------------------------------|-----------------------------------------|
| 2OC7 | STRUCTURE OF HEPATITIS C VIRAL NS3 PROTEASE DOMAIN COMPLEXED WITH NS4A PEPTIDE AND KETOAMIDE SCH571696                                      | VIRAL PROTEIN                           |
| 2OC8 | STRUCTURE OF HEPATITIS C VIRAL NS3 PROTEASE DOMAIN COMPLEXED WITH NS4A PEPTIDE AND KETOAMIDE SCH503034                                      | OXIDOREDUCTASE                          |
| 2OCC | BOVINE HEART CYTOCHROME C OXIDASE AT THE FULLY OXIDIZED STATE                                                                               | HORMONE/GROWTH FACTOR                   |
| 2OCF | HUMAN ESTROGEN RECEPTOR ALPHA LIGAND-BINDING DOMAIN IN COMPLEX WITH ESTRADIOL AND THE E2#23 FN3 MONOBODY                                    | HYDROLASE                               |
| 2OCV | STRUCTURAL BASIS OF NA <sup>+</sup> ACTIVATION MIMICRY IN MURINE THROMBIN                                                                   | ENDOCYTOSIS/EXOCYTOSIS                  |
| 2OCY | COMPLEX OF THE GUANINE EXCHANGE FACTOR SEC2P AND THE RAB GTPASE SEC4P                                                                       | HYDROLASE                               |
| 2OD2 | CRYSTAL STRUCTURE OF YHST2 I117F MUTANT BOUND TO CARBA-NAD <sup>+</sup> AND AN ACETYLATED H4 PEPTIDE                                        | HYDROLASE                               |
| 2OD3 | HUMAN THROMBIN CHIMERA WITH HUMAN RESIDUES 184A, 186, 186A, 186B, 186C AND 222 REPLACED BY MURINE THROMBIN EQUIVALENTS.                     | HYDROLASE                               |
| 2OD7 | CRYSTAL STRUCTURE OF YHST2 BOUND TO THE INTERMEDIATE ANALOGUE ADP-HPD, AND AND ACEYLATED H4 PEPTIDE                                         | PROTEIN BINDING                         |
| 2OD8 | STRUCTURE OF A PEPTIDE DERIVED FROM CDC9 BOUND TO PCNA                                                                                      | HYDROLASE                               |
| 2OD9 | STRUCTURAL BASIS FOR NICOTINAMIDE INHIBITION AND BASE EXCHANGE IN SIR2 ENZYMES                                                              | PROTEIN BINDING                         |
| 2ODB | THE CRYSTAL STRUCTURE OF HUMAN CDC42 IN COMPLEX WITH THE CRIB DOMAIN OF HUMAN P21-ACTIVATED KINASE 6 (PAK6)                                 | SIGNALING PROTEIN                       |
| 2ODE | CRYSTAL STRUCTURE OF THE HETERODIMERIC COMPLEX OF HUMAN RGS8 AND ACTIVATED GI ALPHA 3                                                       | MEMBRANE PROTEIN, PROTEIN BINDING       |
| 2ODG | COMPLEX OF BARRIER-TO-AUTOINTEGRATION FACTOR AND LEM-DOMAIN OF EMERIN                                                                       | BLOOD CLOTTING/BLOOD CLOTTING INHIBITOR |
| 2ODY | THROMBIN-BOUND BOOPHILIN DISPLAYS A FUNCTIONAL AND ACCESSIBLE REACTIVE-SITE LOOP                                                            | TRANSCRIPTION                           |
| 2OEN | STRUCTURAL MECHANISM FOR THE FINE-TUNING OF CCPA FUNCTION BY THE SMALL MOLECULE EFFECTORS GLUCOSE-6-PHOSPHATE AND FRUCTOSE-1,6-BISPHOSPHATE | APOPTOSIS                               |
| 2OF5 | OLIGOMERIC DEATH DOMAIN COMPLEX                                                                                                             | METAL BINDING PROTEIN                   |
| 2OGX | THE CRYSTAL STRUCTURE OF THE MOLYBDENUM STORAGE PROTEIN FROM AZOTOBACTER VINELANDII LOADED WITH POLYOXOTUNGSTATES (WSTO)                    | TRANSFERASE                             |
| 2OH0 | CRYSTAL STRUCTURE OF PROTEIN KINASE A IN COMPLEX WITH PYRIDINE-PYRAZOLOPYRIDINE BASED INHIBITORS                                            | IMMUNE SYSTEM                           |
| 2O19 | STRUCTURE OF THE 2C/LD/QL9 ALLOGENEIC COMPLEX                                                                                               | HYDROLASE                               |
| 2O1N | CRYSTAL STRUCTURE OF HCV NS3-4A R155K MUNTANT                                                                                               | OXIDOREDUCTASE                          |
| 2O1Z | CRYSTAL STRUCTURE OF THE TRYPTAMINE-DERIVED (INDOL-3-ACETAMIDE)-TTQ ADDUCT OF AROMATIC AMINE DEHYDROGENASE                                  | IMMUNE SYSTEM                           |
| 2O1E | MYCOPLASMA ARTHRITIDIS-DERIVED MITOGEN COMPLEXED WITH CLASS                                                                                 |                                         |

|      |                                                                                                                      |                                   |
|------|----------------------------------------------------------------------------------------------------------------------|-----------------------------------|
|      | II MHC MOLECULE HLA-DR1/HA COMPLEX IN THE PRESENCE OF EDTA                                                           | TRANSFERASE                       |
| 2OJF | CRYSTAL STRUCTURE OF PROTEIN KINASE A IN COMPLEX WITH PYRIDINE-PYRAZOLOPYRIDINE BASED INHIBITORS                     | TRANSFERASE                       |
| 2OJX | MOLECULAR AND STRUCTURAL BASIS OF POLO-LIKE KINASE 1 SUBSTRATE RECOGNITION: IMPLICATIONS IN CENTROSOMAL LOCALIZATION | OXIDOREDUCTASE                    |
| 2OJY | CRYSTAL STRUCTURE OF INDOL-3-ACETALDEHYDE DERIVED TTQ-AMIDE ADDUCT OF AROMATIC AMINE DEHYDROGENASE                   | IMMUNE SYSTEM                     |
| 2OJZ | ANTI-DNA ANTIBODY ED10                                                                                               | IMMUNE SYSTEM/DNA                 |
| 2OK0 | FAB ED10-DNA COMPLEX                                                                                                 | OXIDOREDUCTASE                    |
| 2OK4 | CRYSTAL STRUCTURE OF AROMATIC AMINE DEHYDROGENASE TTQ-PHENYLACETALDEHYDE ADDUCT OXIDIZED WITH FERRICYANIDE           | OXIDOREDUCTASE                    |
| 2OK6 | CRYSTAL STRUCTURE OF AROMATIC AMINE DEHYDROGENASE TTQ-FORMAMIDE ADDUCT OXIDIZED WITH FERRICYANIDE.                   | TRANSFERASE                       |
| 2OKR | CRYSTAL STRUCTURE OF THE P38A-MAPKAP KINASE 2 HETERODIMER                                                            | IMMUNE SYSTEM                     |
| 2OL3 | CRYSTAL STRUCTURE OF BM3.3 SCFV TCR IN COMPLEX WITH PBM8-H-2KBM8 MHC CLASS I MOLECULE                                | COMPLEX (BINDING PROTEIN/PEPTIDE) |
| 2OLB | OLIGOPEPTIDE BINDING PROTEIN (OPPA) COMPLEXED WITH TRI-LYSINE                                                        | HORMONE                           |
| 2OLY | STRUCTURE OF HUMAN INSULIN IN PRESENCE OF UREA AT PH 7.0                                                             | HORMONE                           |
| 2OLZ | STRUCTURE OF HUMAN INSULIN IN PRESENCE OF THIOCYANATE AT PH 7                                                        | HORMONE                           |
| 2OM0 | STRUCTURE OF HUMAN INSULIN IN PRESENCE OF UREA AT PH 6.5                                                             | HORMONE                           |
| 2OM1 | STRUCTURE OF HUMAN INSULIN IN PRESENCE OF THIOCYANATE AT PH 6.5                                                      | SIGNALING PROTEIN                 |
| 2OM2 | CRYSTAL STRUCTURE OF HUMAN G[ALPHA]I1 BOUND TO THE GOLOCO MOTIF OF RGS14                                             | RIBOSOME                          |
| 2OM7 | STRUCTURAL BASIS FOR INTERACTION OF THE RIBOSOME WITH THE SWITCH REGIONS OF GTP-BOUND ELONGATION FACTORS             | HORMONE                           |
| 2OMG | STRUCTURE OF HUMAN INSULIN COCRYSTALLIZED WITH PROTAMINE AND UREA                                                    | HORMONE                           |
| 2OMH | STRUCTURE OF HUMAN INSULIN COCRYSTALLIZED WITH ARG-12 PEPTIDE IN PRESENCE OF UREA                                    | HORMONE                           |
| 2OMI | STRUCTURE OF HUMAN INSULIN COCRYSTALLIZED WITH PROTAMINE                                                             | MEMBRANE PROTEIN                  |
| 2ONK | ABC TRANSPORTER MODBC IN COMPLEX WITH ITS BINDING PROTEIN MODA                                                       | TRANSFERASE                       |
| 2ONL | CRYSTAL STRUCTURE OF THE P38A-MAPKAP KINASE 2 HETERODIMER                                                            | OXIDOREDUCTASE                    |
| 2OO5 | STRUCTURE OF TRANSHYDROGENASE (DI.H2NADH)2(DIII.NADP+)1 ASYMMETRIC COMPLEX                                           | LIGASE                            |
| 2OOB | CRYSTAL STRUCTURE OF THE UBA DOMAIN FROM CBL-B UBIQUITIN LIGASE IN COMPLEX WITH UBIQUITIN                            | OXIDOREDUCTASE                    |

|      |                                                                                                                                                                  |                                       |
|------|------------------------------------------------------------------------------------------------------------------------------------------------------------------|---------------------------------------|
| 2OOR | STRUCTURE OF TRANSHYDROGENASE (DI.NAD+) <sub>2</sub> (DIII.H <sub>2</sub> NADPH) <sub>1</sub> ASYMMETRIC COMPLEX                                                 | OXIDOREDUCTASE                        |
| 2OOV | CRYSTAL STRUCTURE OF HANSENULA POLYMORPHA AMINE OXIDASE TO 1.7 ANGSTROMS                                                                                         | TRANSFERASE                           |
| 2OOX | CRYSTAL STRUCTURE OF THE ADENYLATE SENSOR FROM AMP-ACTIVATED PROTEIN KINASE COMPLEXED WITH AMP                                                                   | TRANSFERASE                           |
| 2OOY | CRYSTAL STRUCTURE OF THE ADENYLATE SENSOR FROM AMP-ACTIVATED PROTEIN KINASE COMPLEXED WITH ATP                                                                   | IMMUNE SYSTEM                         |
| 2OP4 | CRYSTAL STRUCTURE OF QUORUM-QUENCHING ANTIBODY 1G9                                                                                                               | STRUCTURAL GENOMICS, UNKNOWN FUNCTION |
| 2OPL | CRYSTAL STRUCTURE OF OSMC-LIKE PROTEIN FROM GEOBACTER SULFURREDUCTENS AT 1.50 A RESOLUTION                                                                       | TRANSFERASE                           |
| 2OPP | CRYSTAL STRUCTURE OF HIV-1 REVERSE TRANSCRIPTASE IN COMPLEX WITH GW420867X.                                                                                      | TRANSFERASE                           |
| 2OPQ | CRYSTAL STRUCTURE OF L100I MUTANT HIV-1 REVERSE TRANSCRIPTASE IN COMPLEX WITH GW420867X.                                                                         | TRANSFERASE                           |
| 2OPR | CRYSTAL STRUCTURE OF K101E MUTANT HIV-1 REVERSE TRANSCRIPTASE IN COMPLEX WITH GW420867X.                                                                         | TRANSFERASE                           |
| 2OPZ | AVPF BOUND TO BIR3-XIAP                                                                                                                                          | APOPTOSIS INHIBITOR                   |
| 2OQ1 | TANDEM SH2 DOMAINS OF ZAP-70 WITH 19-MER ZETA1 PEPTIDE                                                                                                           | TRANSFERASE                           |
| 2OQ6 | CRYSTAL STRUCTURE OF JMJD2A COMPLEXED WITH HISTONE H3 PEPTIDE TRIMETHYLATED AT LYS9                                                                              | OXIDOREDUCTASE                        |
| 2OQE | CRYSTAL STRUCTURE OF HANSENULA POLYMORPHA AMINE OXIDASE IN COMPLEX WITH XE TO 1.6 ANGSTROMS                                                                      | OXIDOREDUCTASE                        |
| 2OQJ | CRYSTAL STRUCTURE ANALYSIS OF FAB 2G12 IN COMPLEX WITH PEPTIDE 2G12.1                                                                                            | IMMUNE SYSTEM                         |
| 2OR9 | THE STRUCTURE OF THE ANTI-C-MYC ANTIBODY 9E10 FAB FRAGMENT/EPITOPE PEPTIDE COMPLEX REVEALS A NOVEL BINDING MODE DOMINATED BY THE HEAVY CHAIN HYPERVARIABLE LOOPS | IMMUNE SYSTEM                         |
| 2ORB | THE STRUCTURE OF THE ANTI-C-MYC ANTIBODY 9E10 FAB FRAGMENT                                                                                                       | IMMUNE SYSTEM                         |
| 2OS2 | CRYSTAL STRUCTURE OF JMJD2A COMPLEXED WITH HISTONE H3 PEPTIDE TRIMETHYLATED AT LYS36                                                                             | OXIDOREDUCTASE                        |
| 2OS8 | RIGOR-LIKE STRUCTURES OF MUSCLE MYOSINS REVEAL KEY MECHANICAL ELEMENTS IN THE TRANSDUCTION PATHWAYS OF THIS ALLOSTERIC MOTOR                                     | CONTRACTILE PROTEIN                   |
| 2OSL | CRYSTAL STRUCTURE OF RITUXIMAB FAB IN COMPLEX WITH AN EPITOPE PEPTIDE                                                                                            | IMMUNE SYSTEM                         |
| 2OT0 | FRUCTOSE-1,6-BISPHOSPHATE ALDOLASE FROM RABBIT MUSCLE IN COMPLEX WITH A C-TERMINAL PEPTIDE OF WISKOTT-ALDRICH SYNDROME PROTEIN                                   | LYASE                                 |
| 2OT3 | CRYSTAL STRUCTURE OF RABEX-5 VPS9 DOMAIN IN COMPLEX WITH NUCLEOTIDE FREE RAB21                                                                                   | PROTEIN TRANSPORT                     |
| 2OT7 | CRYSTAL STRUCTURE OF JMJD2A COMPLEXED WITH HISTONE H3 PEPTIDE MONOMETHYLATED AT LYS9                                                                             | OXIDOREDUCTASE                        |
|      |                                                                                                                                                                  | TRANSPORT PROTEIN                     |

|      |                                                                                                                                  |                               |
|------|----------------------------------------------------------------------------------------------------------------------------------|-------------------------------|
| 2OT8 | KARYOPHERIN BETA2/TRANSPORTIN-HNRNPM NLS COMPLEX                                                                                 | CONTRACTILE PROTEIN           |
| 2OTG | RIGOR-LIKE STRUCTURES OF MUSCLE MYOSINS REVEAL KEY MECHANICAL ELEMENTS IN THE TRANSDUCTION PATHWAYS OF THIS ALLOSTERIC MOTOR     | RIBOSOME                      |
| 2OTJ | 13-DEOXYTEDANOLIDE BOUND TO THE LARGE SUBUNIT OF HALOARCULA MARISMORTUI                                                          | RIBOSOME                      |
| 2OTL | GIRODAZOLE BOUND TO THE LARGE SUBUNIT OF HALOARCULA MARISMORTUI                                                                  | HYDROLASE/HYDROLASE INHIBITOR |
| 2OUL | THE STRUCTURE OF CHAGASIN IN COMPLEX WITH A CYSTEINE PROTEASE CLARIFIES THE BINDING MODE AND EVOLUTION OF A NEW INHIBITOR FAMILY | PROTEIN BINDING/TRANSFERASE   |
| 2OV2 | THE CRYSTAL STRUCTURE OF THE HUMAN RAC3 IN COMPLEX WITH THE CRIB DOMAIN OF HUMAN P21-ACTIVATED KINASE 4 (PAK4)                   | TRANSCRIPTION                 |
| 2OVH | PROGESTERONE RECEPTOR WITH BOUND ASOPRISNIL AND A PEPTIDE FROM THE CO-REPRESSOR SMRT                                             | CONTRACTILE PROTEIN           |
| 2OVK | CRYSTAL STRUCTURE OF RIGOR-LIKE SQUID MYOSIN S1                                                                                  | TRANSCRIPTION                 |
| 2OVM | PROGESTERONE RECEPTOR WITH BOUND ASOPRISNIL AND A PEPTIDE FROM THE CO-REPRESSOR NCOR                                             | TRANSCRIPTION/CELL CYCLE      |
| 2OVP | STRUCTURE OF THE SKP1-FBW7 COMPLEX                                                                                               | TRANSCRIPTION/CELL CYCLE      |
| 2OVQ | STRUCTURE OF THE SKP1-FBW7-CYCLINEDEGC COMPLEX                                                                                   | TRANSCRIPTION/CELL CYCLE      |
| 2OVR | STRUCTURE OF THE SKP1-FBW7-CYCLINEDEGN COMPLEX                                                                                   | OXIDOREDUCTASE                |
| 2OX0 | CRYSTAL STRUCTURE OF JMJD2A COMPLEXED WITH HISTONE H3 PEPTIDE DIMETHYLATED AT LYS9                                               | TRANSPORT PROTEIN             |
| 2OX5 | THE SOXYZ COMPLEX OF PARACOCCUS PANTOTROPHUS                                                                                     | TRANSPORT PROTEIN             |
| 2OXG | THE SOXYZ COMPLEX OF PARACOCCUS PANTOTROPHUS                                                                                     | TRANSPORT PROTEIN             |
| 2OXH | THE SOXYZ COMPLEX OF PARACOCCUS PANTOTROPHUS                                                                                     | LIGASE                        |
| 2OXQ | STRUCTURE OF THE UBCH5 :CHIP U-BOX COMPLEX                                                                                       | HYDROLASE                     |
| 2OXW | HUMAN MMP-12 COMPLEXED WITH THE PEPTIDE IAG                                                                                      | HYDROLASE                     |
| 2OXZ | HUMAN MMP-12 IN COMPLEX WITH TWO PEPTIDES PQG AND IAG                                                                            | HYDROLASE                     |
| 2OY2 | HUMAN MMP-8 IN COMPLEX WITH PEPTIDE IAG                                                                                          | CONTRACTILE PROTEIN           |
| 2OY6 | CRYSTAL STRUCTURE OF SQUID MG.ADP MYOSIN S1                                                                                      | BLOOD CLOTTING                |
| 2OYH | CRYSTAL STRUCTURE OF FRAGMENT D OF GAMMAD298,301A FIBRINOGEN WITH THE PEPTIDE LIGAND GLY-HIS-ARG-PRO-AMIDE                       | BLOOD CLOTTING                |
| 2OYI | CRYSTAL STRUCTURE OF FRAGMENT D OF GAMMAD298,301A FIBRINOGEN WITH THE PEPTIDE LIGAND GLY-PRO-ARG-PRO-AMIDE                       | ELECTRON TRANSPORT            |
| 2OZ1 | THE SOXAX COMPLEX OF RHODOVULUM SULFIDOPHILUM                                                                                    | CELL ADHESION                 |
| 2OZ4 | STRUCTURAL PLASTICITY IN IGSF DOMAIN 4 OF ICAM-1 MEDIATES CELL SURFACE DIMERIZATION                                              | SIGNALING PROTEIN/TRANSFERASE |
| 2OZA | STRUCTURE OF P38ALPHA COMPLEX                                                                                                    | RNA BINDING PROTEIN/RNA       |

|      |                                                                                                                                                                                                     |                   |
|------|-----------------------------------------------------------------------------------------------------------------------------------------------------------------------------------------------------|-------------------|
| 2OZB | STRUCTURE OF A HUMAN PRP31-15.5K-U4 SNRNA COMPLEX                                                                                                                                                   |                   |
| 2OZL | HUMAN PYRUVATE DEHYDROGENASE S264E VARIANT                                                                                                                                                          | OXIDOREDUCTASE    |
| 2OZN | THE COHESIN-DOCKERIN COMPLEX OF NAGJ AND NAGH FROM CLOSTRIDIUM PERFRINGENS                                                                                                                          | TOXIN             |
| 2P0R | STRUCTURE OF HUMAN CALPAIN 9 IN COMPLEX WITH LEUPEPTIN                                                                                                                                              | HYDROLASE         |
| 2P0W | HUMAN HISTONE ACETYLTRANSFERASE 1 (HAT1)                                                                                                                                                            | TRANSFERASE       |
| 2P15 | CRYSTAL STRUCTURE OF THE ER ALPHA LIGAND BINDING DOMAIN WITH THE AGONIST ORTHO-TRIFLUOROMETHYLPHENYLVINYL ESTRADIOL                                                                                 | HORMONE RECEPTOR  |
| 2P16 | FACTOR XA IN COMPLEX WITH THE INHIBITOR APIXABAN (BMS-562247) AKA 1-(4-METHOXYPHENYL)-7-OXO-6-(4-(2-OXO-1-PIPERIDINYL)PHENYL)-4,5,6,7-TETRAHYDRO-1H-PYRAZOLO[3, 4-C]PYRIDINE-3-CARBOXAMIDE          | HYDROLASE         |
| 2P1L | STRUCTURE OF THE BCL-XL:BECLIN 1 COMPLEX                                                                                                                                                            | APOPTOSIS         |
| 2P1M | TIR1-ASK1 COMPLEX STRUCTURE                                                                                                                                                                         | SIGNALING PROTEIN |
| 2P1N | MECHANISM OF AUXIN PERCEPTION BY THE TIR1 UBIQUITIN LIGASE                                                                                                                                          | SIGNALING PROTEIN |
| 2P1O | MECHANISM OF AUXIN PERCEPTION BY THE TIR1 UBIQUITIN LIGASE                                                                                                                                          | SIGNALING PROTEIN |
| 2P1P | MECHANISM OF AUXIN PERCEPTION BY THE TIR1 UBIQUITIN LIGASE                                                                                                                                          | SIGNALING PROTEIN |
| 2P1Q | MECHANISM OF AUXIN PERCEPTION BY THE TIR1 UBIQUITIN LIGASE                                                                                                                                          | SIGNALING PROTEIN |
| 2P1T | CRYSTAL STRUCTURE OF THE LIGAND BINDING DOMAIN OF THE RETINOID X RECEPTOR ALPHA IN COMPLEX WITH 3-(2'-METHOXY)-TETRAHYDRONAPHTYL CINNAMIC ACID AND A FRAGMENT OF THE COACTIVATOR TIF-2              | HORMONE RECEPTOR  |
| 2P1U | CRYSTAL STRUCTURE OF THE LIGAND BINDING DOMAIN OF THE RETINOID X RECEPTOR ALPHA IN COMPLEX WITH 3-(2'-ETHOXY)-TETRAHYDRONAPHTYL CINNAMIC ACID AND A FRAGMENT OF THE COACTIVATOR TIF-2               | HORMONE RECEPTOR  |
| 2P1V | CRYSTAL STRUCTURE OF THE LIGAND BINDING DOMAIN OF THE RETINOID X RECEPTOR ALPHA IN COMPLEX WITH 3-(2'-PROPOXY)-TETRAHYDRONAPHTYL CINNAMIC ACID AND A FRAGMENT OF THE COACTIVATOR TIF-2              | HORMONE RECEPTOR  |
| 2P22 | STRUCTURE OF THE YEAST ESCRT-I HETEROTETRAMER CORE                                                                                                                                                  | TRANSPORT PROTEIN |
| 2P24 | I-AU/MBP125-135                                                                                                                                                                                     | IMMUNE SYSTEM     |
| 2P28 | STRUCTURE OF THE PHE2 AND PHE3 FRAGMENTS OF THE INTEGRIN BETA2 SUBUNIT                                                                                                                              | CELL ADHESION     |
| 2P2C | INHIBITION OF CASPASE-2 BY A DESIGNED ANKYRIN REPEAT PROTEIN (DARPIN)                                                                                                                               | HYDROLASE         |
| 2P3B | CRYSTAL STRUCTURE OF THE SUBTYPE B WILD TYPE HIV PROTEASE COMPLEXED WITH TL-3 INHIBITOR                                                                                                             | HYDROLASE         |
| 2P3F | CRYSTAL STRUCTURE OF THE FACTOR XA/NAP5 COMPLEX                                                                                                                                                     | HYDROLASE         |
| 2P3T | CRYSTAL STRUCTURE OF HUMAN FACTOR XA COMPLEXED WITH 3-CHLORO-4-(2-METHYLAMINO-IMIDAZOL-1-YLMETHYL)-THIOPHENE-2-CARBOXYLIC ACID [4-CHLORO-2-(5-CHLORO-PYRIDIN-2-YLCARBAMOYL)-6-METHOXY-PHENYL]-AMIDE | BLOOD CLOTTING    |

|      |                                                                                                                                                                                                                 |                               |
|------|-----------------------------------------------------------------------------------------------------------------------------------------------------------------------------------------------------------------|-------------------------------|
| 2P3U | CRYSTAL STRUCTURE OF HUMAN FACTOR XA COMPLEXED WITH 3-CHLORO-N-(4-CHLORO-2-[(5-CHLOROPYRIDIN-2-YL)AMINO]CARBONYL)-6-METHOXYPHENYL)-4-[(1-METHYL-1H-IMIDAZOL-2-YL)METHYL]THIOPHENE-2-CARBOXAMIDE {PFIZER 320663} | BLOOD CLOTTING                |
| 2P42 | COMPLEX OF A CAMELID SINGLE-DOMAIN VHH ANTIBODY FRAGMENT WITH RNASE A AT 1.8Å RESOLUTION: SE3-MONO-2 CRYSTAL FORM WITH THREE SE-MET SITES (M34, M51, M83) IN VHH SCAFFOLD                                       | HYDROLASE/IMMUNE SYSTEM       |
| 2P43 | COMPLEX OF A CAMELID SINGLE-DOMAIN VHH ANTIBODY FRAGMENT WITH RNASE A AT 1.65Å RESOLUTION: SE3-MONO-1 CRYSTAL FORM WITH THREE SE-MET SITES (M34, M51, M83) IN VHH SCAFFOLD                                      | HYDROLASE/IMMUNE SYSTEM       |
| 2P44 | COMPLEX OF A CAMELID SINGLE-DOMAIN VHH ANTIBODY FRAGMENT WITH RNASE A AT 1.8Å RESOLUTION: SE5A-MONO-1 CRYSTAL FORM WITH FIVE SE-MET SITES (M34, M51, F68M, M83, L86M) IN VHH SCAFFOLD                           | HYDROLASE/IMMUNE SYSTEM       |
| 2P49 | COMPLEX OF A CAMELID SINGLE-DOMAIN VHH ANTIBODY FRAGMENT WITH RNASE A AT 1.4Å RESOLUTION: NATIVE MONO_1 CRYSTAL FORM                                                                                            | HYDROLASE/IMMUNE SYSTEM       |
| 2P4A | X-RAY STRUCTURE OF A CAMELID AFFINITY MATURED SINGLE-DOMAIN VHH ANTIBODY FRAGMENT IN COMPLEX WITH RNASE A                                                                                                       | HYDROLASE/IMMUNE SYSTEM       |
| 2P4N | HUMAN MONOMERIC KINESIN (1BG2) AND BOVINE TUBULIN (1JFF) DOCKED INTO THE 9-ÅNGSTRÖM CRYO-EM MAP OF NUCLEOTIDE-FREE KINESIN COMPLEXED TO THE MICROTUBULE                                                         | TRANSPORT PROTEIN             |
| 2P54 | A CRYSTAL STRUCTURE OF PPAR ALPHA BOUND WITH SRC1 PEPTIDE AND GW735                                                                                                                                             | TRANSCRIPTION                 |
| 2P58 | STRUCTURE OF THE YERSINIA PESTIS TYPE III SECRETION SYSTEM NEEDLE PROTEIN YSCF IN COMPLEX WITH ITS CHAPERONES YSCE/YSCG                                                                                         | TRANSPORT PROTEIN/CHAPERONE   |
| 2P59 | CRYSTAL STRUCTURE OF HEPATITIS C VIRUS NS3.4A PROTEASE                                                                                                                                                          | VIRAL PROTEIN                 |
| 2P5B | THE COMPLEX STRUCTURE OF JMJD2A AND TRIMETHYLATED H3K36 PEPTIDE                                                                                                                                                 | METAL BINDING PROTEIN         |
| 2P5E | CRYSTAL STRUCTURES OF HIGH AFFINITY HUMAN T-CELL RECEPTORS BOUND TO PMHC REVEAL NATIVE DIAGONAL BINDING GEOMETRY                                                                                                | IMMUNE SYSTEM                 |
| 2P5T | MOLECULAR AND STRUCTURAL CHARACTERIZATION OF THE PEZAT CHROMOSOMAL TOXIN-ANTITOXIN SYSTEM OF THE HUMAN PATHOGEN STREPTOCOCCUS PNEUMONIAE                                                                        | TRANSCRIPTION REGULATOR       |
| 2P5W | CRYSTAL STRUCTURES OF HIGH AFFINITY HUMAN T-CELL RECEPTORS BOUND TO PMHC REVEAL NATIVE DIAGONAL BINDING GEOMETRY                                                                                                | IMMUNE SYSTEM                 |
| 2P6A | THE STRUCTURE OF THE ACTIVIN:FOLLISTATIN 315 COMPLEX                                                                                                                                                            | SIGNALING PROTEIN             |
| 2P6B | CRYSTAL STRUCTURE OF HUMAN CALCINEURIN IN COMPLEX WITH PVIVIT PEPTIDE                                                                                                                                           | HYDROLASE/HYDROLASE REGULATOR |
| 2P7T | CRYSTAL STRUCTURE OF KCSA MUTANT                                                                                                                                                                                | MEMBRANE PROTEIN              |
| 2P7V | CRYSTAL STRUCTURE OF THE ESCHERICHIA COLI REGULATOR OF SIGMA 70, RSD, IN COMPLEX WITH SIGMA 70 DOMAIN 4                                                                                                         | TRANSCRIPTION                 |
| 2P8L | CRYSTAL STRUCTURE OF THE HIV-1 CROSS NEUTRALIZING MONOCLONAL ANTIBODY 2F5 IN COMPLEX WITH GP41 PEPTIDE ELLELDKWASLWN                                                                                            | VIRAL PROTEIN                 |
|      |                                                                                                                                                                                                                 | VIRAL PROTEIN                 |

|      |                                                                                                                                          |                    |
|------|------------------------------------------------------------------------------------------------------------------------------------------|--------------------|
| 2P8M | CRYSTAL STRUCTURE OF THE HIV-1 CROSS NEUTRALIZING MONOCLONAL ANTIBODY 2F5 IN COMPLEX WITH GP41 PEPTIDE ELLELDKWASLWN IN NEW CRYSTAL FORM | HYDROLASE          |
| 2P8O | CRYSTAL STRUCTURE OF A BENZOHYDROXAMIC ACID/VANADATE COMPLEX BOUND TO CHYMOTRYPSIN A                                                     | PROTEIN TRANSPORT  |
| 2P8Q | CRYSTAL STRUCTURE OF HUMAN IMPORTIN BETA BOUND TO THE SNURPORTIN1 IBB-DOMAIN                                                             | TRANSLATION        |
| 2P8W | FITTED STRUCTURE OF EEF2 IN THE 80S:EEF2:GDPNP CRYO-EM RECONSTRUCTION                                                                    | TRANSLATION        |
| 2P8X | FITTED STRUCTURE OF ADPR-EEF2 IN THE 80S:ADPR-EEF2:GDPNP CRYO-EM RECONSTRUCTION                                                          | TRANSLATION        |
| 2P8Z | FITTED STRUCTURE OF ADPR-EEF2 IN THE 80S:ADPR-EEF2:GDPNP:SORDARIN CRYO-EM RECONSTRUCTION                                                 | HYDROLASE          |
| 2P93 | FACTOR XA IN COMPLEX WITH THE INHIBITOR 5-CHLORO-N-(2-(4-(2-OXOPYRIDIN-1(2H)-YL)BENZAMIDO)ETHYL)THIOPHENE-2-CARBOXAMIDE                  | HYDROLASE          |
| 2P94 | FACTOR XA IN COMPLEX WITH THE INHIBITOR 3-CHLORO-N-((1R,2S)-2-(4-(2-OXOPYRIDIN-1(2H)-YL)BENZAMIDO)CYCLOHEXYL)-1H-INDOLE-6-CARBOXAMIDE    | HYDROLASE          |
| 2P95 | FACTOR XA IN COMPLEX WITH THE INHIBITOR 5-CHLORO-N-((1R,2S)-2-(4-(2-OXOPYRIDIN-1(2H)-YL)BENZAMIDO) CYCLOPENTYL) THIOPHENE-2-CARBOXAMIDE  | STRUCTURAL PROTEIN |
| 2P9I | CRYSTAL STRUCTURE OF BOVINE ARP2/3 COMPLEX CO-CRYSTALLIZED WITH ADP AND CROSSLINKED WITH GLUTERALDEHYDE                                  | STRUCTURAL PROTEIN |
| 2P9K | CRYSTAL STRUCTURE OF BOVINE ARP2/3 COMPLEX CO-CRYSTALLIZED WITH ATP AND CROSSLINKED WITH GLUTARALDEHYDE                                  | STRUCTURAL PROTEIN |
| 2P9L | CRYSTAL STRUCTURE OF BOVINE ARP2/3 COMPLEX                                                                                               | STRUCTURAL PROTEIN |
| 2P9N | CRYSTAL STRUCTURE OF BOVINE ARP2/3 COMPLEX CO-CRYSTALLIZED WITH ADP                                                                      | STRUCTURAL PROTEIN |
| 2P9P | CRYSTAL STRUCTURE OF BOVINE ARP2/3 COMPLEX CO-CRYSTALLIZED WITH ADP                                                                      | STRUCTURAL PROTEIN |
| 2P9S | STRUCTURE OF BOVINE ARP2/3 COMPLEX CO-CRYSTALLIZED WITH ATP/MG2+                                                                         | STRUCTURAL PROTEIN |
| 2P9U | CRYSTAL STRUCTURE OF BOVINE ARP2/3 COMPLEX CO-CRYSTALLIZED WITH AMP-PNP AND CALCIUM                                                      | HYDROLASE          |
| 2P9V | STRUCTURE OF AMPC BETA-LACTAMASE WITH CROSS-LINKED ACTIVE SITE AFTER EXPOSURE TO SMALL MOLECULE INHIBITOR                                | TRANSFERASE        |
| 2PA8 | X-RAY CRYSTAL STRUCTURE OF THE D/L SUBCOMPLEX OF THE SULFOLOBUS SOLFATARICUS RNA POLYMERASE                                              | STRUCTURAL PROTEIN |
| 2PAV | TERNARY COMPLEX OF PROFILIN-ACTIN WITH THE LAST POLY-PRO OF HUMAN VASP                                                                   | HYDROLASE          |
| 2PB8 | CRYSTAL STRUCTURE OF THE COMPLEX FORMED BETWEEN PHOSPHOLIPASE A2 AND PEPTIDE ALA-VAL-TYR-SER AT 2.0 Å RESOLUTION                         | STRUCTURAL PROTEIN |
| 2PBD | TERNARY COMPLEX OF PROFILIN-ACTIN WITH THE POLY-PRO-GAB DOMAIN OF VASP*                                                                  |                    |

|      |                                                                                                                                                |                                   |
|------|------------------------------------------------------------------------------------------------------------------------------------------------|-----------------------------------|
| 2PBI | THE MULTIFUNCTIONAL NATURE OF GBETA5/RGS9 REVEALED FROM ITS CRYSTAL STRUCTURE                                                                  | SIGNALING PROTEIN                 |
| 2PBK | CRYSTAL STRUCTURE OF KSHV PROTEASE IN COMPLEX WITH HEXAPEPTIDE PHOSPHONATE INHIBITOR                                                           | VIRAL PROTEIN                     |
| 2PC4 | CRYSTAL STRUCTURE OF FRUCTOSE-BISPHOSPHATE ALDOLASE FROM PLASMODIUM FALCIPARUM IN COMPLEX WITH TRAP-TAIL DETERMINED AT 2.4 ANGSTROM RESOLUTION | LYASE                             |
| 2PCB | CRYSTAL STRUCTURE OF A COMPLEX BETWEEN ELECTRON TRANSFER PARTNERS, CYTOCHROME C PEROXIDASE AND CYTOCHROME C                                    | OXIDOREDUCTASE/ELECTRON TRANSPORT |
| 2PCC | CRYSTAL STRUCTURE OF A COMPLEX BETWEEN ELECTRON TRANSFER PARTNERS, CYTOCHROME C PEROXIDASE AND CYTOCHROME C                                    | OXIDOREDUCTASE/ELECTRON TRANSPORT |
| 2PCD | STRUCTURE OF PROTOCATECHUATE 3,4-DIOXYGENASE FROM PSEUDOMONAS AERUGINOSA AT 2.15 ANGSTROMS RESOLUTION                                          | DIOXYGENASE                       |
| 2PCP | ANTIBODY FAB COMPLEXED WITH PHENCYCLIDINE                                                                                                      | IMMUNOGLOBULIN                    |
| 2PCU | HUMAN CARBOXYPEPTIDASE A4 IN COMPLEX WITH A CLEAVED HEXAPEPTIDE.                                                                               | HYDROLASE                         |
| 2PE6 | NON-COVALENT COMPLEX BETWEEN HUMAN SUMO-1 AND HUMAN UBC9                                                                                       | PROTEIN BINDING, LIGASE           |
| 2PEG | CRYSTAL STRUCTURE OF TREMATOMUS BERNACCHII HEMOGLOBIN IN A PARTIAL HEMICHROME STATE                                                            | OXYGEN STORAGE/TRANSPORT          |
| 2PEH | CRYSTAL STRUCTURE OF THE UHM DOMAIN OF HUMAN SPF45 IN COMPLEX WITH SF3B155-ULM5                                                                | PROTEIN BINDING                   |
| 2PEM | CRYSTAL STRUCTURE OF RBCX IN COMPLEX WITH SUBSTRATE                                                                                            | CHAPERONE                         |
| 2PF4 | CRYSTAL STRUCTURE OF THE FULL-LENGTH SIMIAN VIRUS 40 SMALL T ANTIGEN COMPLEXED WITH THE PROTEIN PHOSPHATASE 2A AALPHA SUBUNIT                  | HYDROLASE REGULATOR/VIRAL PROTEIN |
| 2PG1 | STRUCTURAL ANALYSIS OF A CYTOPLASMIC DYNEIN LIGHT CHAIN-INTERMEDIATE CHAIN COMPLEX                                                             | STRUCTURAL PROTEIN                |
| 2PGB | INHIBITOR-FREE HUMAN THROMBIN MUTANT C191A-C220A                                                                                               | HYDROLASE                         |
| 2PGH | STRUCTURE DETERMINATION OF AQUOMET PORCINE HEMOGLOBIN AT 2.8 ANGSTROM RESOLUTION                                                               | OXYGEN TRANSPORT                  |
| 2PGQ | HUMAN THROMBIN MUTANT C191A-C220A IN COMPLEX WITH THE INHIBITOR PPACK                                                                          | HYDROLASE                         |
| 2PHB | AN ORALLY EFFICACIOUS FACTOR XA INHIBITOR                                                                                                      | BLOOD CLOTTING                    |
| 2PHK | THE CRYSTAL STRUCTURE OF A PHOSPHORYLASE KINASE PEPTIDE SUBSTRATE COMPLEX: KINASE SUBSTRATE RECOGNITION                                        | COMPLEX (TRANSFERASE/PEPTIDE)     |
| 2PI2 | FULL-LENGTH REPLICATION PROTEIN A SUBUNITS RPA14 AND RPA32                                                                                     | REPLICATION, DNA BINDING PROTEIN  |
| 2PJR | HELICASE PRODUCT COMPLEX                                                                                                                       | HYDROLASE/DNA                     |
| 2PJW | THE VPS27/HSE1 COMPLEX IS A GAT DOMAIN-BASED SCAFFOLD FOR UBIQUITIN-DEPENDENT SORTING                                                          | ENDOCYTOSIS/EXOCYTOSIS            |
| 2PJX | CRYSTAL STRUCTURE OF THE MUNC18C/SYNTAXIN4 N-PEPTIDE COMPLEX                                                                                   | ENDOCYTOSIS/EXOCYTOSIS            |
| 2PJY | STRUCTURAL BASIS FOR COOPERATIVE ASSEMBLY OF THE TGF-BETA                                                                                      | CYTOKINE/CYTOKINE RECEPTOR        |



| SIGNALING COMPLEX |                                                                                                                                                                                                                                                    |                                          |
|-------------------|----------------------------------------------------------------------------------------------------------------------------------------------------------------------------------------------------------------------------------------------------|------------------------------------------|
| 2PK9              | STRUCTURE OF THE PHO85-PHO80 CDK-CYCLIN COMPLEX OF THE PHOSPHATE-RESPONSIVE SIGNAL TRANSDUCTION PATHWAY                                                                                                                                            | SIGNALING PROTEIN,TRANSFERASE/CELL CYCLE |
| 2PKA              | REFINED 2 ANGSTROMS X-RAY CRYSTAL STRUCTURE OF PORCINE PANCREATIC KALLIKREIN A, A SPECIFIC TRYPSIN-LIKE SERINE PROTEINASE. CRYSTALLIZATION, STRUCTURE DETERMINATION, CRYSTALLOGRAPHIC REFINEMENT, STRUCTURE AND ITS COMPARISON WITH BOVINE TRYPSIN | SERINE PROTEINASE                        |
| 2PKG              | STRUCTURE OF A COMPLEX BETWEEN THE A SUBUNIT OF PROTEIN PHOSPHATASE 2A AND THE SMALL T ANTIGEN OF SV40                                                                                                                                             | HYDROLASE REGULATOR/VIRAL PROTEIN        |
| 2PKL              | ANDROGEN RECEPTOR LBD WITH SMALL MOLECULE                                                                                                                                                                                                          | HORMONE RECEPTOR                         |
| 2PKQ              | CRYSTAL STRUCTURE OF THE PHOTOSYNTHETIC A2B2-GLYCERALDEHYDE-3-PHOSPHATE DEHYDROGENASE, COMPLEXED WITH NADP                                                                                                                                         | OXIDOREDUCTASE                           |
| 2PKS              | THROMBIN IN COMPLEX WITH INHIBITOR                                                                                                                                                                                                                 | HYDROLASE                                |
| 2PL9              | CRYSTAL STRUCTURE OF CHEY-MG(2+)-BEF(3)(-) IN COMPLEX WITH CHEZ(C19) PEPTIDE SOLVED FROM A P2(1)2(1)2 CRYSTAL                                                                                                                                      | SIGNALING PROTIEN                        |
| 2PLD              | NUCLEAR MAGNETIC RESONANCE STRUCTURE OF AN SH2 DOMAIN OF PHOSPHOLIPASE C-GAMMA1 COMPLEXED WITH A HIGH AFFINITY BINDING PEPTIDE                                                                                                                     | PHOSPHORIC DIESTER HYDROLASE             |
| 2PLX              | TRYPSIN COMPLEXED TO A SYNTHETIC PEPTIDE FROM VERONICA HEDERIFOLIA                                                                                                                                                                                 | HYDROLASE                                |
| 2PM6              | CRYSTAL STRUCTURE OF YEAST SEC13/31 EDGE ELEMENT OF THE COPII VESICULAR COAT, NATIVE VERSION                                                                                                                                                       | PROTEIN TRANSPORT                        |
| 2PM7              | CRYSTAL STRUCTURE OF YEAST SEC13/31 EDGE ELEMENT OF THE COPII VESICULAR COAT, SELENOMETHIONINE VERSION                                                                                                                                             | PROTEIN TRANSPORT                        |
| 2PMC              | CRYSTAL STRUCTURE OF CHEY-MG(2+) IN COMPLEX WITH CHEZ(C15) PEPTIDE SOLVED FROM A P1 CRYSTAL                                                                                                                                                        | SIGNALING PROTEIN                        |
| 2PMI              | STRUCTURE OF THE PHO85-PHO80 CDK-CYCLIN COMPLEX OF THE PHOSPHATE-RESPONSIVE SIGNAL TRANSDUCTION PATHWAY WITH BOUND ATP-GAMMA-S                                                                                                                     | SIGNALING PROTEIN,TRANSFERASE/CELL CYCLE |
| 2PMS              | CRYSTAL STRUCTURE OF THE COMPLEX OF HUMAN LACTOFERRIN N-LOBE AND LACTOFERRIN-BINDING DOMAIN OF PNEUMOCOCCAL SURFACE PROTEIN A                                                                                                                      | METAL TRANSPORT, HYDROLASE               |
| 2PMW              | THE CRYSTAL STRUCTURE OF PROPROTEIN CONVERTASE SUBTILISIN KEXIN TYPE 9 (PCSK9)                                                                                                                                                                     | HYDROLASE                                |
| 2PMZ              | ARCHAEAL RNA POLYMERASE FROM SULFOLOBUS SOLFATARICUS                                                                                                                                                                                               | TRANSLATION, TRANSFERASE                 |
| 2PNR              | CRYSTAL STRUCTURE OF THE ASYMMETRIC PDK3-L2 COMPLEX                                                                                                                                                                                                | TRANSFERASE                              |
| 2PNZ              | CRYSTAL STRUCTURE OF THE P. ABYSSI EXOSOME RNASE PH RING COMPLEXED WITH UDP AND GMP                                                                                                                                                                | HYDROLASE/HYDROLASE                      |
| 2PO0              | CRYSTAL STRUCTURE OF THE P. ABYSSI EXOSOME RNASE PH RING COMPLEXED WITH ADP IN DOUBLE CONFORMATION                                                                                                                                                 | HYDROLASE/HYDROLASE                      |
| 2PO1              | CRYSTAL STRUCTURE OF THE P. ABYSSI EXOSOME RNASE PH RING COMPLEXED WITH A SINGLE STRANDED 10-MER POLY(A) RNA                                                                                                                                       | HYDROLASE/HYDROLASE/RNA                  |
| 2PO2              | CRYSTAL STRUCTURE OF THE P. ABYSSI EXOSOME RNASE PH RING                                                                                                                                                                                           | HYDROLASE/HYDROLASE                      |

| COMPLEXED WITH CDP |                                                                                                                                         |                                      |
|--------------------|-----------------------------------------------------------------------------------------------------------------------------------------|--------------------------------------|
| 2PO6               | CRYSTAL STRUCTURE OF CD1D-LIPID-ANTIGEN COMPLEXED WITH BETA-2-MICROGLOBULIN, NKT15 ALPHA-CHAIN AND NKT15 BETA-CHAIN                     | LIPID BINDING PROTEIN/IMMUNE SYSTEM  |
| 2PON               | SOLUTION STRUCTURE OF THE BCL-XL/BECLIN-1 COMPLEX                                                                                       | APOPTOSIS INHIBITOR                  |
| 2POP               | THE CRYSTAL STRUCTURE OF TAB1 AND BIR1 COMPLEX                                                                                          | SIGNALING PROTEIN/APOPTOSIS          |
| 2POY               | CRYPTOSPORIDIUM PARVUM CYCLOPHILIN TYPE PEPTIDYL-PROLYL CIS-TRANS ISOMERASE CGD2_4120 IN COMPLEX WITH CYCLOSPORIN A                     | ISOMERASE                            |
| 2PPB               | CRYSTAL STRUCTURE OF THE T. THERMOPHILUS RNAP POLYMERASE ELONGATION COMPLEX WITH THE NTP SUBSTRATE ANALOG AND ANTIBIOTIC STREPTOLYDIGIN | TRANSFERASE/DNA/RNA                  |
| 2PQ2               | STRUCTURE OF SERINE PROTEINASE K COMPLEX WITH A HIGHLY FLEXIBLE HYDROPHOBIC PEPTIDE AT 1.8A RESOLUTION                                  | HYDROLASE                            |
| 2PQA               | CRYSTAL STRUCTURE OF FULL-LENGTH HUMAN RPA 14/32 HETERODIMER                                                                            | REPLICATION                          |
| 2PQK               | X-RAY CRYSTAL STRUCTURE OF HUMAN MCL-1 IN COMPLEX WITH BIM BH3                                                                          | APOPTOSIS                            |
| 2PQN               | CRYSTAL STRUCTURE OF YEAST FIS1 COMPLEXED WITH A FRAGMENT OF YEAST MDV1                                                                 | APOPTOSIS                            |
| 2PQR               | CRYSTAL STRUCTURE OF YEAST FIS1 COMPLEXED WITH A FRAGMENT OF YEAST CAF4                                                                 | APOPTOSIS                            |
| 2PR3               | FACTOR XA INHIBITOR                                                                                                                     | BLOOD CLOTTING                       |
| 2PR4               | CRYSTAL STRUCTURE OF FAB' FROM THE HIV-1 NEUTRALIZING ANTIBODY 2F5                                                                      | VIRAL PROTEIN                        |
| 2PRC               | PHOTOSYNTHETIC REACTION CENTER FROM RHODOPSEUDOMONAS VIRIDIS (UBIQUINONE-2 COMPLEX)                                                     | PHOTOSYNTHETIC REACTION CENTER       |
| 2PRG               | LIGAND-BINDING DOMAIN OF THE HUMAN PEROXISOME PROLIFERATOR ACTIVATED RECEPTOR GAMMA                                                     | COMPLEX (THIAZOLIDINEDIONE/RECEPTOR) |
| 2PSM               | CRYSTAL STRUCTURE OF INTERLEUKIN 15 IN COMPLEX WITH INTERLEUKIN 15 RECEPTOR ALPHA                                                       | CYTOKINE                             |
| 2PT7               | CRYSTAL STRUCTURE OF CAG VIRB11 (HP0525) AND AN INHIBITORY PROTEIN (HP1451)                                                             | HYDROLASE/PROTEIN BINDING            |
| 2PU9               | CRYSTAL STRUCTURE OF THE BINARY COMPLEX BETWEEN FERREDOXIN: THIOREDOXIN REDUCTASE AND THIOREDOXIN F                                     | ELECTRON TRANSPORT                   |
| 2PUK               | CRYSTAL STRUCTURE OF THE BINARY COMPLEX BETWEEN FERREDOXIN: THIOREDOXIN REDUCTASE AND THIOREDOXIN M                                     | ELECTRON TRANSPORT                   |
| 2PUO               | CRYSTAL STRUCTURE OF THE NEM MODIFIED FERREDOXIN:THIOREDOXIN REDUCTASE                                                                  | ELECTRON TRANSPORT                   |
| 2PUQ               | CRYSTAL STRUCTURE OF ACTIVE SITE INHIBITED COAGULATION FACTOR VIIA IN COMPLEX WITH SOLUBLE TISSUE FACTOR                                | BLOOD CLOTTING                       |
| 2PUX               | CRYSTAL STRUCTURE OF MURINE THROMBIN IN COMPLEX WITH THE EXTRACELLULAR FRAGMENT OF MURINE PAR3                                          | HYDROLASE                            |
| 2PUY               | CRYSTAL STRUCTURE OF THE BHC80 PHD FINGER                                                                                               | TRANSCRIPTION                        |
| 2PV1               | CRYSTALLOGRAPHIC STRUCTURE OF SURA FIRST PEPTIDYL-PROLYL                                                                                | ISOMERASE                            |

|      |                                                                                                                                                    |                        |
|------|----------------------------------------------------------------------------------------------------------------------------------------------------|------------------------|
|      | ISOMERASE DOMAIN COMPLEXED WITH PEPTIDE WEYIPNV                                                                                                    | ISOMERASE              |
| 2PV2 | CRYSTALLOGRAPHIC STRUCTURE OF SURA FIRST PEPTIDYL-PROLYL ISOMERASE DOMAIN COMPLEXED WITH PEPTIDE NFTLKFWDIFRK                                      | ISOMERASE              |
| 2PV3 | CRYSTALLOGRAPHIC STRUCTURE OF SURA FRAGMENT LACKING THE SECOND PEPTIDYL-PROLYL ISOMERASE DOMAIN COMPLEXED WITH PEPTIDE NFTLKFWDIFRK                | HYDROLASE              |
| 2PV9 | CRYSTAL STRUCTURE OF MURINE THROMBIN IN COMPLEX WITH THE EXTRACELLULAR FRAGMENT OF MURINE PAR4                                                     | TRANSFERASE REGULATOR  |
| 2PVC | DNMT3L RECOGNIZES UNMETHYLATED HISTONE H3 LYSINE 4                                                                                                 | ELECTRON TRANSPORT     |
| 2PVD | CRYSTAL STRUCTURE OF THE REDUCED FERREDOXIN:THIOREDOXIN REDUCTASE                                                                                  | TRANSFERASE            |
| 2PVF | CRYSTAL STRUCTURE OF TYROSINE PHOSPHORYLATED ACTIVATED FGF RECEPTOR 2 (FGFR2) KINASE DOMAIN IN COMPLEX WITH ATP ANALOG AND SUBSTRATE PEPTIDE       | ELECTRON TRANSPORT     |
| 2PVG | CRYSTAL STRUCTURE OF THE BINARY COMPLEX BETWEEN FERREDOXIN AND FERREDOXIN:THIOREDOXIN REDUCTASE                                                    | ELECTRON TRANSPORT     |
| 2PVO | CRYSTAL STRUCTURE OF THE TERNARY COMPLEX BETWEEN THIOREDOXIN F, FERREDOXIN, AND FERREDOXIN: THIOREDOXIN REDUCTASE                                  | IMMUNE SYSTEM          |
| 2PW1 | CRYSTAL STRUCTURE OF THE HIV-1 CROSS NEUTRALIZING MONOCLONAL ANTIBODY 2F5 IN COMPLEX WITH GP41 PEPTIDE ELDKWNSL                                    | IMMUNE SYSTEM          |
| 2PW2 | CRYSTAL STRUCTURE OF THE HIV-1 CROSS NEUTRALIZING MONOCLONAL ANTIBODY 2F5 IN COMPLEX WITH GP41 PEPTIDE ELDKWKSL                                    | HYDROLASE              |
| 2PW8 | CRYSTAL STRUCTURE OF SULFO-HIRUDIN COMPLEXED TO THROMBIN                                                                                           | OXIDOREDUCTASE         |
| 2PXJ | THE COMPLEX STRUCTURE OF JMJD2A AND MONOMETHYLATED H3K36 PEPTIDE                                                                                   | IMMUNE SYSTEM          |
| 2PXY | CRYSTAL STRUCTURES OF IMMUNE RECEPTOR COMPLEXES                                                                                                    | IMMUNE SYSTEM          |
| 2PYE | CRYSTAL STRUCTURES OF HIGH AFFINITY HUMAN T-CELL RECEPTORS BOUND TO PMHC REVEAL NATIVE DIAGONAL BINDING GEOMETRY TCR CLONE C5C1 COMPLEXED WITH MHC | IMMUNE SYSTEM          |
| 2PYF | CRYSTAL STRUCTURES OF HIGH AFFINITY HUMAN T-CELL RECEPTORS BOUND TO PMHC REVEAL NATIVE DIAGONAL BINDING GEOMETRY UNBOUND TCR CLONE 5-1             | STRUCTURAL PROTEIN/DNA |
| 2PYO | DROSOPHILA NUCLEOSOME CORE                                                                                                                         | TRANSFERASE            |
| 2Q0N | STRUCTURE OF HUMAN P21 ACTIVATING KINASE 4 (PAK4) IN COMPLEX WITH A CONSENSUS PEPTIDE                                                              | TRANSCRIPTION          |
| 2Q0O | CRYSTAL STRUCTURE OF AN ANTI-ACTIVATION COMPLEX IN BACTERIAL QUORUM SENSING                                                                        | HYDROLASE              |
| 2Q1J | THE DISCOVERY OF GLYCINE AND RELATED AMINO ACID-BASED FACTOR XA INHIBITORS                                                                         | TRANSCRIPTION          |
| 2Q1Z | CRYSTAL STRUCTURE OF RHODOBACTER SPHAEROIDES SIGE IN COMPLEX WITH THE ANTI-SIGMA CHRR                                                              | VIRUS/RNA              |

|      |                                                                                                                                                                   |                                       |
|------|-------------------------------------------------------------------------------------------------------------------------------------------------------------------|---------------------------------------|
| 2Q26 | FHV VIRUS LIKE PARTICLE                                                                                                                                           | ISOMERASE                             |
| 2Q2E | CRYSTAL STRUCTURE OF THE TOPOISOMERASE VI HOLOENZYME FROM METHANOSARCINA MAZEI                                                                                    | TRANSFERASE                           |
| 2Q3C | 2.1 A RESOLUTION CRYSTAL STRUCTURE OF O-ACETYL SERINE SULFHYDRYLASE (OASS) HOLOENZYME FROM MYCOBACTERIUM TUBERCULOSIS IN COMPLEX WITH THE INHIBITORY PEPTIDE DFSI | VIRAL PROTEIN/VIRAL PROTEIN INHIBITOR |
| 2Q3I | CRYSTAL STRUCTURE OF THE D10-P3/IQN17 COMPLEX: A D-PEPTIDE INHIBITOR OF HIV-1 ENTRY BOUND TO THE GP41 COILED-COIL POCKET                                          | PLANT PROTEIN                         |
| 2Q3N | AGGLUTININ FROM ABRUS PRECATORIUS (APA-I)                                                                                                                         | TRANSCRIPTION                         |
| 2Q3Y | ANCESTRAL CORTICIOD RECEPTOR IN COMPLEX WITH DOC                                                                                                                  | TRANSFERASE                           |
| 2Q3Z | TRANSGLUTAMINASE 2 UNDERGOES LARGE CONFORMATIONAL CHANGE UPON ACTIVATION                                                                                          | LIGAND BINDING PROTEIN                |
| 2Q59 | CRYSTAL STRUCTURE OF PPARGAMMA LBD BOUND TO FULL AGONIST MRL20                                                                                                    | ISOMERASE                             |
| 2Q5A | HUMAN PIN1 BOUND TO L-PEPTIDE                                                                                                                                     | PROTEIN TRANSPORT                     |
| 2Q5D | CRYSTAL STRUCTURE OF HUMAN IMPORTIN BETA BOUND TO THE SNURPORTIN1 IBB-DOMAIN SECOND CRYSTAL FORM                                                                  | TRANSFERASE                           |
| 2Q5W | THE X-RAY CRYSTAL STRUCTURE OF MOLYBDOPTERIN SYNTHASE FROM STAPHYLOCOCCUS AUREUS                                                                                  | PROTEIN TRANSPORT                     |
| 2Q5Y | CRYSTAL STRUCTURE OF THE C-TERMINAL DOMAIN OF HNUP98                                                                                                              | HYDROLASE                             |
| 2Q6G | CRYSTAL STRUCTURE OF SARS-COV MAIN PROTEASE H41A MUTANT IN COMPLEX WITH AN N-TERMINAL SUBSTRATE                                                                   | TRANSCRIPTION                         |
| 2Q6J | CRYSTAL STRUCTURE OF ESTROGEN RECEPTOR ALPHA COMPLEXED TO A B-N SUBSTITUTED LIGAND                                                                                | IMMUNE SYSTEM                         |
| 2Q6W | THE STRUCTURE OF HLA-DRA, DRB3*0101 (DR52A) WITH BOUND PLATELET INTEGRIN PEPTIDE ASSOCIATED WITH FETAL AND NEONATAL ALLOIMMUNE THROMBOCYTOPENIA                   | IMMUNE SYSTEM                         |
| 2Q76 | MOUSE ANTI-HEN EGG WHITE LYSOZYME ANTIBODY F10.6.6 FAB FRAGMENT                                                                                                   | HORMONE                               |
| 2Q7I | THE WILD TYPE ANDROGEN RECEPTOR LIGAND BINDING DOMAIN BOUND WITH TESTOSTERONE AND AN AR 20-30 PEPTIDE                                                             | HORMONE                               |
| 2Q7J | THE WILD TYPE ANDROGEN RECEPTOR LIGAND BINDING DOMAIN BOUND WITH TESTOSTERONE AND A TIF2 BOX 3 COACTIVATOR PEPTIDE 740-753                                        | HORMONE                               |
| 2Q7K | THE ANDROGEN RECEPTOR PROSTATE CANCER MUTANT H874Y LIGAND BINDING DOMAIN BOUND WITH TESTOSTERONE AND AN AR 20-30 PEPTIDE                                          | HORMONE                               |
| 2Q7L | THE ANDROGEN RECEPTOR PROSTATE CANCER MUTANT H874Y LIGAND BINDING DOMAIN BOUND WITH TESTOSTERONE AND A TIF2 BOX3 COACTIVATOR PEPTIDE 740-753                      | CYTOKINE RECEPTOR/CYTOKINE            |
| 2Q7N | CRYSTAL STRUCTURE OF LEUKEMIA INHIBITORY FACTOR IN COMPLEX WITH LIF RECEPTOR (DOMAINS 1-5)                                                                        | OXIDOREDUCTASE                        |
| 2Q7Q | CRYSTAL STRUCTURE OF ALCALIGENES FAECALIS AADH IN COMPLEX                                                                                                         |                                       |

| WITH P-CHLOROBENZYLAMINE. |                                                                                                                                                                                                                                                                        |                                  |
|---------------------------|------------------------------------------------------------------------------------------------------------------------------------------------------------------------------------------------------------------------------------------------------------------------|----------------------------------|
| 2Q7Y                      | STRUCTURE OF THE ENDOGENOUS INKT CELL LIGAND IGB3 BOUND TO MCD1D                                                                                                                                                                                                       | IMMUNE SYSTEM                    |
| 2Q86                      | STRUCTURE OF THE MOUSE INVARIANT NKT CELL RECEPTOR VALPHA14                                                                                                                                                                                                            | IMMUNE SYSTEM                    |
| 2Q8A                      | STRUCTURE OF THE MALARIA ANTIGEN AMA1 IN COMPLEX WITH A GROWTH-INHIBITORY ANTIBODY                                                                                                                                                                                     | IMMUNE SYSTEM                    |
| 2Q8B                      | STRUCTURE OF THE MALARIA ANTIGEN AMA1 IN COMPLEX WITH A GROWTH-INHIBITORY ANTIBODY                                                                                                                                                                                     | IMMUNE SYSTEM                    |
| 2Q8C                      | CRYSTAL STRUCTURE OF JMJD2A IN TERNARY COMPLEX WITH AN HISTONE H3K9ME3 PEPTIDE AND 2-OXOGLUTARATE                                                                                                                                                                      | OXIDOREDUCTASE                   |
| 2Q8D                      | CRYSTAL STRUCTURE OF JMJD2A IN TERNARY COMPLEX WITH HISTONE H3-K36ME2 AND SUCCINATE                                                                                                                                                                                    | OXIDOREDUCTASE                   |
| 2Q8E                      | SPECIFICITY AND MECHANISM OF JMJD2A, A TRIMETHYLLYSINE-SPECIFIC HISTONE DEMETHYLASE                                                                                                                                                                                    | OXIDOREDUCTASE                   |
| 2Q8I                      | PYRUVATE DEHYDROGENASE KINASE ISOFORM 3 IN COMPLEX WITH ANTITUMOR DRUG RADICICOL                                                                                                                                                                                       | TRANSFERASE                      |
| 2Q97                      | COMPLEX OF MAMMALIAN ACTIN WITH TOXOFILIN FROM TOXOPLASMA GONDII                                                                                                                                                                                                       | STRUCTURAL PROTEIN/CELL INVASION |
| 2Q9I                      | CRYSTAL STRUCTURE OF D-DIMER FROM HUMAN FIBRIN COMPLEXED WITH MET-HIS-ARG-PRO-TYR-AMIDE.                                                                                                                                                                               | BLOOD CLOTTING                   |
| 2Q9Q                      | THE CRYSTAL STRUCTURE OF FULL LENGTH HUMAN GINS COMPLEX                                                                                                                                                                                                                | REPLICATION                      |
| 2QA4                      | A MORE COMPLETE STRUCTURE OF THE THE L7/L12 STALK OF THE HALOARCUA MARISMORTUI 50S LARGE RIBOSOMAL SUBUNIT                                                                                                                                                             | RIBOSOME                         |
| 2QA6                      | CRYSTAL STRUCTURE OF ESTROGEN RECEPTOR ALPHA MUTANT 537S COMPLEXED WITH 4-(6-HYDROXY-1H-INDAZOL-3-YL)BENZENE-1,3-DIOL                                                                                                                                                  | TRANSCRIPTION                    |
| 2QA8                      | CRYSTAL STRUCTURE OF THE ESTROGEN RECEPTOR ALPHA LIGAND BINDING DOMAIN MUTANT 537S COMPLEXED WITH GENISTEIN                                                                                                                                                            | TRANSCRIPTION                    |
| 2QAB                      | CRYSTAL STRUCTURE OF ESTROGEN RECEPTOR ALPHA LIGAND BINDING DOMAIN MUTANT 537S COMPLEXED WITH AN ETHYL INDAZOLE COMPOUND                                                                                                                                               | TRANSCRIPTION                    |
| 2QAC                      | THE CLOSED MTIP-MYOSINA-TAIL COMPLEX FROM THE MALARIA PARASITE INVASION MACHINERY                                                                                                                                                                                      | MEMBRANE PROTEIN                 |
| 2QAD                      | STRUCTURE OF TYROSINE-SULFATED 412D ANTIBODY COMPLEXED WITH HIV-1 YU2 GP120 AND CD4                                                                                                                                                                                    | VIRAL PROTEIN/IMMUNE SYSTEM      |
| 2QAG                      | CRYSTAL STRUCTURE OF HUMAN SEPTIN TRIMER 2/6/7                                                                                                                                                                                                                         | CELL CYCLE, STRUCTURAL PROTEIN   |
| 2QAL                      | CRYSTAL STRUCTURE OF THE BACTERIAL RIBOSOME FROM ESCHERICHIA COLI IN COMPLEX WITH NEOMYCIN. THIS FILE CONTAINS THE 30S SUBUNIT OF THE FIRST 70S RIBOSOME, WITH NEOMYCIN BOUND. THE ENTIRE CRYSTAL STRUCTURE CONTAINS TWO 70S RIBOSOMES AND IS DESCRIBED IN REMARK 400. | RIBOSOME                         |
| 2QAM                      | CRYSTAL STRUCTURE OF THE BACTERIAL RIBOSOME FROM ESCHERICHIA COLI IN COMPLEX WITH NEOMYCIN. THIS FILE CONTAINS THE 50S SUBUNIT OF THE FIRST 70S RIBOSOME, WITH NEOMYCIN BOUND. THE ENTIRE CRYSTAL STRUCTURE CONTAINS TWO                                               | RIBOSOME                         |

|      |                                                                                                                                                                                                                                                                                          |                     |
|------|------------------------------------------------------------------------------------------------------------------------------------------------------------------------------------------------------------------------------------------------------------------------------------------|---------------------|
|      | 70S RIBOSOMES AND IS DESCRIBED IN REMARK 400.                                                                                                                                                                                                                                            | RIBOSOME            |
| 2QAN | CRYSTAL STRUCTURE OF THE BACTERIAL RIBOSOME FROM ESCHERICHIA COLI IN COMPLEX WITH NEOMYCIN. THIS FILE CONTAINS THE 30S SUBUNIT OF THE SECOND 70S RIBOSOME, WITH NEOMYCIN BOUND. THE ENTIRE CRYSTAL STRUCTURE CONTAINS TWO 70S RIBOSOMES AND IS DESCRIBED IN REMARK 400.                  | RIBOSOME            |
| 2QAO | CRYSTAL STRUCTURE OF THE BACTERIAL RIBOSOME FROM ESCHERICHIA COLI IN COMPLEX WITH NEOMYCIN. THIS FILE CONTAINS THE 50S SUBUNIT OF THE SECOND 70S RIBOSOME, WITH NEOMYCIN BOUND. THE ENTIRE CRYSTAL STRUCTURE CONTAINS TWO 70S RIBOSOMES AND IS DESCRIBED IN REMARK 400.                  | RIBOSOME            |
| 2QAR | STRUCTURE OF THE 2TEL CRYSTALLIZATION MODULE FUSED TO T4 LYSOZYME WITH A HELICAL LINKER.                                                                                                                                                                                                 | HYDROLASE REGULATOR |
| 2QAS | CRYSTAL STRUCTURE OF CAULOBACTER CRESCENTUS SSPB ORTHOLOG                                                                                                                                                                                                                                | HYDROLASE ACTIVATOR |
| 2QB0 | STRUCTURE OF THE 2TEL CRYSTALLIZATION MODULE FUSED TO T4 LYSOZYME WITH AN ALA-GLY-PRO LINKER.                                                                                                                                                                                            | HYDROLASE REGULATOR |
| 2QB9 | CRYSTAL STRUCTURE OF THE BACTERIAL RIBOSOME FROM ESCHERICHIA COLI IN COMPLEX WITH GENTAMICIN. THIS FILE CONTAINS THE 30S SUBUNIT OF THE FIRST 70S RIBOSOME, WITH GENTAMICIN BOUND. THE ENTIRE CRYSTAL STRUCTURE CONTAINS TWO 70S RIBOSOMES AND IS DESCRIBED IN REMARK 400.               | RIBOSOME            |
| 2QBA | CRYSTAL STRUCTURE OF THE BACTERIAL RIBOSOME FROM ESCHERICHIA COLI IN COMPLEX WITH GENTAMICIN. THIS FILE CONTAINS THE 50S SUBUNIT OF THE FIRST 70S RIBOSOME, WITH GENTAMICIN BOUND. THE ENTIRE CRYSTAL STRUCTURE CONTAINS TWO 70S RIBOSOMES AND IS DESCRIBED IN REMARK 400.               | RIBOSOME            |
| 2QBB | CRYSTAL STRUCTURE OF THE BACTERIAL RIBOSOME FROM ESCHERICHIA COLI IN COMPLEX WITH GENTAMICIN. THIS FILE CONTAINS THE 30S SUBUNIT OF THE SECOND 70S RIBOSOME, WITH GENTAMICIN BOUND. THE ENTIRE CRYSTAL STRUCTURE CONTAINS TWO 70S RIBOSOMES AND IS DESCRIBED IN REMARK 400.              | RIBOSOME            |
| 2QBC | CRYSTAL STRUCTURE OF THE BACTERIAL RIBOSOME FROM ESCHERICHIA COLI IN COMPLEX WITH GENTAMICIN. THIS FILE CONTAINS THE 50S SUBUNIT OF THE SECOND 70S RIBOSOME, WITH GENTAMICIN BOUND. THE ENTIRE CRYSTAL STRUCTURE CONTAINS TWO 70S RIBOSOMES AND IS DESCRIBED IN REMARK 400.              | RIBOSOME            |
| 2QBD | CRYSTAL STRUCTURE OF THE BACTERIAL RIBOSOME FROM ESCHERICHIA COLI IN COMPLEX WITH RIBOSOME RECYCLING FACTOR (RRF). THIS FILE CONTAINS THE 30S SUBUNIT OF THE FIRST 70S RIBOSOME. THE ENTIRE CRYSTAL STRUCTURE CONTAINS TWO 70S RIBOSOMES AND IS DESCRIBED IN REMARK 400.                 | RIBOSOME            |
| 2QBE | CRYSTAL STRUCTURE OF THE BACTERIAL RIBOSOME FROM ESCHERICHIA COLI IN COMPLEX WITH RIBOSOME RECYCLING FACTOR (RRF). THIS FILE CONTAINS THE 50S SUBUNIT OF THE FIRST 70S RIBOSOME, WITH RRF BOUND. THE ENTIRE CRYSTAL STRUCTURE CONTAINS TWO 70S RIBOSOMES AND IS DESCRIBED IN REMARK 400. | RIBOSOME            |
| 2QBF | CRYSTAL STRUCTURE OF THE BACTERIAL RIBOSOME FROM ESCHERICHIA COLI IN COMPLEX WITH RIBOSOME RECYCLING FACTOR (RRF). THIS FILE CONTAINS THE 30S SUBUNIT OF THE SECOND 70S RIBOSOME. THE ENTIRE CRYSTAL STRUCTURE CONTAINS TWO 70S RIBOSOMES AND IS DESCRIBED IN REMARK 400.                | RIBOSOME            |
| 2QBG | CRYSTAL STRUCTURE OF THE BACTERIAL RIBOSOME FROM                                                                                                                                                                                                                                         | RIBOSOME            |

|      |                                                                                                                                                                                                                                                                                                                         |                                   |
|------|-------------------------------------------------------------------------------------------------------------------------------------------------------------------------------------------------------------------------------------------------------------------------------------------------------------------------|-----------------------------------|
|      | ESCHERICHIA COLI IN COMPLEX WITH RIBOSOME RECYCLING FACTOR (RRF). THIS FILE CONTAINS THE 50S SUBUNIT OF THE SECOND 70S RIBOSOME, WITH RRF BOUND. THE ENTIRE CRYSTAL STRUCTURE CONTAINS TWO 70S RIBOSOMES AND IS DESCRIBED IN REMARK 400.                                                                                | RIBOSOME                          |
| 2QBH | CRYSTAL STRUCTURE OF THE BACTERIAL RIBOSOME FROM ESCHERICHIA COLI IN COMPLEX WITH GENTAMICIN AND RIBOSOME RECYCLING FACTOR (RRF). THIS FILE CONTAINS THE 30S SUBUNIT OF THE FIRST 70S RIBOSOME, WITH GENTAMICIN BOUND. THE ENTIRE CRYSTAL STRUCTURE CONTAINS TWO 70S RIBOSOMES AND IS DESCRIBED IN REMARK 400.          | RIBOSOME                          |
| 2QBI | CRYSTAL STRUCTURE OF THE BACTERIAL RIBOSOME FROM ESCHERICHIA COLI IN COMPLEX WITH GENTAMICIN AND RIBOSOME RECYCLING FACTOR (RRF). THIS FILE CONTAINS THE 50S SUBUNIT OF THE FIRST 70S RIBOSOME, WITH GENTAMICIN AND RRF BOUND. THE ENTIRE CRYSTAL STRUCTURE CONTAINS TWO 70S RIBOSOMES AND IS DESCRIBED IN REMARK 400.  | RIBOSOME                          |
| 2QBJ | CRYSTAL STRUCTURE OF THE BACTERIAL RIBOSOME FROM ESCHERICHIA COLI IN COMPLEX WITH GENTAMICIN AND RIBOSOME RECYCLING FACTOR (RRF). THIS FILE CONTAINS THE 30S SUBUNIT OF THE SECOND 70S RIBOSOME, WITH GENTAMICIN BOUND. THE ENTIRE CRYSTAL STRUCTURE CONTAINS TWO 70S RIBOSOMES AND IS DESCRIBED IN REMARK 400.         | RIBOSOME                          |
| 2QBK | CRYSTAL STRUCTURE OF THE BACTERIAL RIBOSOME FROM ESCHERICHIA COLI IN COMPLEX WITH GENTAMICIN AND RIBOSOME RECYCLING FACTOR (RRF). THIS FILE CONTAINS THE 50S SUBUNIT OF THE SECOND 70S RIBOSOME, WITH GENTAMICIN AND RRF BOUND. THE ENTIRE CRYSTAL STRUCTURE CONTAINS TWO 70S RIBOSOMES AND IS DESCRIBED IN REMARK 400. | RIBOSOME                          |
| 2QBW | THE CRYSTAL STRUCTURE OF PDZ-FIBRONECTIN FUSION PROTEIN                                                                                                                                                                                                                                                                 | UNKNOWN FUNCTION                  |
| 2QBY | CRYSTAL STRUCTURE OF A HETERODIMER OF CDC6/ORC1 INITIATORS BOUND TO ORIGIN DNA (FROM S. SOLFATARICUS)                                                                                                                                                                                                                   | REPLICATION/DNA                   |
| 2QCS | A COMPLEX STRUCTURE BETWEEN THE CATALYTIC AND REGULATORY SUBUNIT OF PROTEIN KINASE A THAT REPRESENTS THE INHIBITED STATE                                                                                                                                                                                                | TRANSFERASE/TRANSFERASE INHIBITOR |
| 2QDY | CRYSTAL STRUCTURE OF FE-TYPE NHASE FROM RHODOCOCCUS ERYTHROPOLIS AJ270                                                                                                                                                                                                                                                  | LYASE                             |
| 2QE7 | CRYSTAL STRUCTURE OF THE F1-ATPASE FROM THE THERMOALKALIPHILIC BACTERIUM BACILLUS SP. TA2.A1                                                                                                                                                                                                                            | HYDROLASE                         |
| 2QEJ | CRYSTAL STRUCTURE OF A STAPHYLOCOCCUS AUREUS PROTEIN (SSL7) IN COMPLEX WITH FC OF HUMAN IGA1                                                                                                                                                                                                                            | IMMUNE SYSTEM                     |
| 2QEX | NEGAMYCIN BINDS TO THE WALL OF THE NASCENT CHAIN EXIT TUNNEL OF THE 50S RIBOSOMAL SUBUNIT                                                                                                                                                                                                                               | RIBOSOME                          |
| 2QFA | CRYSTAL STRUCTURE OF A SURVIVIN-BOREALIN-INCENP CORE COMPLEX                                                                                                                                                                                                                                                            | CELL CYCLE/CELL CYCLE/CELL CYCLE  |
| 2QFC | CRYSTAL STRUCTURE OF BACILLUS THURINGIENSIS PLCR COMPLEXED WITH PAPR                                                                                                                                                                                                                                                    | TRANSCRIPTION REGULATION          |
| 2QG9 | STRUCTURE OF A REGULATORY SUBUNIT MUTANT D19A OF ATCASE FROM E. COLI                                                                                                                                                                                                                                                    | TRANSFERASE/TRANSFERASE REGULATOR |
| 2QGF | STRUCTURE OF REGULATORY CHAIN MUTANT H20A OF ASPARATE TRANSCARBAMOYLASE FROM E. COLI                                                                                                                                                                                                                                    | TRANSFERASE/TRANSFERASE REGULATOR |
|      |                                                                                                                                                                                                                                                                                                                         | TRANSCRIPTION                     |

|      |                                                                                                                              |                             |
|------|------------------------------------------------------------------------------------------------------------------------------|-----------------------------|
| 2QGT | CRYSTAL STRUCTURE OF THE ESTROGEN RECEPTOR ALPHA LIGAND BINDING DOMAIN COMPLEXED TO AN ETHER ESTRADIOL COMPOUND              | TRANSCRIPTION               |
| 2QGW | CRYSTAL STRUCTURE OF THE ESTROGEN RECEPTOR ALPHA LIGAND BINDING DOMAIN COMPLEXED WITH A CHLORO-INDAZOLE COMPOUND             | TRANSCRIPTION               |
| 2QH6 | CRYSTAL STRUCTURE OF THE ESTROGEN RECEPTOR ALPHA LIGAND BINDING DOMAIN COMPLEXED WITH AN OXABICYCLIC DIARYLETHYLENE COMPOUND | PROTEIN BINDING/LIGASE      |
| 2QHO | CRYSTAL STRUCTURE OF THE UBA DOMAIN FROM EDD UBIQUITIN LIGASE IN COMPLEX WITH UBIQUITIN                                      | IMMUNE SYSTEM/VIRAL PROTEIN |
| 2QHR | CRYSTAL STRUCTURE OF THE 13F6-1-2 FAB FRAGMENT BOUND TO ITS EBOLA VIRUS GLYCOPROTEIN PEPTIDE EPI TOPE.                       | MEMBRANE PROTEIN            |
| 2QI9 | ABC-TRANSPORTER BTUCD IN COMPLEX WITH ITS PERIPLASMIC BINDING PROTEIN BTUF                                                   | TRANSFERASE                 |
| 2QIE | STAPHYLOCOCCUS AUREUS MOLYBDOPTERIN SYNTHASE IN COMPLEX WITH PRECURSOR Z                                                     | HORMONE                     |
| 2QIU | STRUCTURE OF HUMAN ARG-INSULIN                                                                                               | SIGNALING PROTEIN/HYDROLASE |
| 2QIY | YEAST DEUBIQUITINASE UBP3 AND BRE5 COFACTOR COMPLEX                                                                          | CYTOKINE/RECEPTOR           |
| 2QJ9 | CRYSTAL STRUCTURE ANALYSIS OF BMP-2 IN COMPLEX WITH BMPR-1A VARIANT B1                                                       | CYTOKINE/RECEPTOR           |
| 2QJA | CRYSTAL STRUCTURE ANALYSIS OF BMP-2 IN COMPLEX WITH BMPR-1A VARIANT B12                                                      | CYTOKINE/RECEPTOR           |
| 2QJB | CRYSTAL STRUCTURE ANALYSIS OF BMP-2 IN COMPLEX WITH BMPR-1A VARIANT IA/IB                                                    | ELECTRON TRANSPORT          |
| 2QJK | CRYSTAL STRUCTURE ANALYSIS OF MUTANT RHODOBACTER SPHAEROIDES BC1 WITH STIGMATELLIN AND ANTIMYCIN                             | ELECTRON TRANSPORT          |
| 2QJP | CRYSTAL STRUCTURE OF WILD TYPE RHODOBACTER SPHAEROIDES WITH STIGMATELLIN AND ANTIMYCIN INHIBITED                             | OXIDOREDUCTASE              |
| 2QJY | CRYSTAL STRUCTURE OF RHODOBACTER SPHAEROIDES DOUBLE MUTANT WITH STIGMATELLIN AND UQ2                                         | TOXIN                       |
| 2QK7 | COVALENT S-F HETERODIMER OF STAPHYLOCOCCAL GAMMA-HEMOLYSIN                                                                   | SIGNALING PROTEIN/HORMONE   |
| 2QKH | CRYSTAL STRUCTURE OF THE EXTRACELLULAR DOMAIN OF HUMAN GIP RECEPTOR IN COMPLEX WITH THE HORMONE GIP                          | IMMUNE SYSTEM               |
| 2QKI | HUMAN C3C IN COMPLEX WITH THE INHIBITOR COMPSTATIN                                                                           | HYDROLASE                   |
| 2QKL | THE CRYSTAL STRUCTURE OF FISSION YEAST MRNA DECAPPING ENZYME DCP1-DCP2 COMPLEX                                               | HYDROLASE                   |
| 2QKM | THE CRYSTAL STRUCTURE OF FISSION YEAST MRNA DECAPPING ENZYME DCP1-DCP2 COMPLEX                                               | TRANSFERASE                 |
| 2QKW | STRUCTURAL BASIS FOR ACTIVATION OF PLANT IMMUNITY BY BACTERIAL EFFECTOR PROTEIN AVRPTO                                       | TRANSCRIPTION/DNA           |
| 2QL2 | CRYSTAL STRUCTURE OF THE BASIC-HELIX-LOOP-HELIX DOMAINS OF THE HETERODIMER E47/NEUROD1 BOUND TO DNA                          | HYDROLASE                   |
| 2QL5 | CRYSTAL STRUCTURE OF CASPASE-7 WITH INHIBITOR AC-DMQD-CHO                                                                    | HYDROLASE                   |



|      |                                                                                                                                                                                                                                                   |                               |
|------|---------------------------------------------------------------------------------------------------------------------------------------------------------------------------------------------------------------------------------------------------|-------------------------------|
| 2QL7 | CRYSTAL STRUCTURE OF CASPASE-7 WITH INHIBITOR AC-IEPD-CHO                                                                                                                                                                                         | HYDROLASE                     |
| 2QL9 | CRYSTAL STRUCTURE OF CASPASE-7 WITH INHIBITOR AC-DQMD-CHO                                                                                                                                                                                         | HYDROLASE                     |
| 2QLB | CRYSTAL STRUCTURE OF CASPASE-7 WITH INHIBITOR AC-ESMD-CHO                                                                                                                                                                                         | HYDROLASE                     |
| 2QLF | CRYSTAL STRUCTURE OF CASPASE-7 WITH INHIBITOR AC-DNLD-CHO                                                                                                                                                                                         | HYDROLASE                     |
| 2QLJ | CRYSTAL STRUCTURE OF CASPASE-7 WITH INHIBITOR AC-WEHD-CHO                                                                                                                                                                                         | TRANSFERASE                   |
| 2QLL | HUMAN LIVER GLYCOGEN PHOSPHORYLASE- GL COMPLEX                                                                                                                                                                                                    | TRANSPORT PROTEIN             |
| 2QLS | CRYSTAL STRUCTURE OF HEMOGLOBIN FROM DOG (CANIS FAMILIARIS) AT 3.5 ANGSTROM RESOLUTION                                                                                                                                                            | TRANSFERASE/PROTEIN BINDING   |
| 2QLV | CRYSTAL STRUCTURE OF THE HETEROTRIMER CORE OF THE S. CEREVISIAE AMPK HOMOLOG SNF1                                                                                                                                                                 | TRANSFERASE                   |
| 2QM6 | CRYSTAL STRUCTURE OF HELICOBACTER PYLORI GAMMA-GLUTAMYLTRANSPEPTIDASE IN COMPLEX WITH GLUTAMATE                                                                                                                                                   | TRANSPORT PROTEIN             |
| 2QMB | STRUCTURE DETERMINATION OF HAEMOGLOBIN FROM TURKEY(MELEAGRIS GALLOPAVO) AT 2.8 ANGSTROM RESOLUTION                                                                                                                                                | TRANSFERASE                   |
| 2QMC | CRYSTAL STRUCTURE OF HELICOBACTER PYLORI GAMMA-GLUTAMYLTRANSPEPTIDASE T380A MUTANT                                                                                                                                                                | SIGNALING PROTEIN/TRANSFERASE |
| 2QME | CRYSTAL STRUCTURE OF HUMAN RAC3 IN COMPLEX WITH CRIB DOMAIN OF HUMAN P21-ACTIVATED KINASE 1 (PAK1)                                                                                                                                                | TRANSLATION                   |
| 2QMU | STRUCTURE OF AN ARCHAEAL HETEROTRIMERIC INITIATION FACTOR 2 REVEALS A NUCLEOTIDE STATE BETWEEN THE GTP AND THE GDP STATES                                                                                                                         | TRANSLATION                   |
| 2QN6 | STRUCTURE OF AN ARCHAEAL HETEROTRIMERIC INITIATION FACTOR 2 REVEALS A NUCLEOTIDE STATE BETWEEN THE GTP AND THE GDP STATES                                                                                                                         | TRANSPORT PROTEIN             |
| 2QNA | CRYSTAL STRUCTURE OF HUMAN IMPORTIN-BETA (127-876) IN COMPLEX WITH THE IBB-DOMAIN OF SNURPORTIN1 (1-65)                                                                                                                                           | SIGNALING PROTEIN             |
| 2QNS | CRYSTAL STRUCTURE OF THE G-PROTEIN BETAGAMMA SUBUNIT BOUND TO A C-TERMINAL REGION OF THE PTH1 PARATHYROID HORMONE RECEPTOR                                                                                                                        | HYDROLASE                     |
| 2QOG | CROTOXIN B, THE BASIC PLA2 FROM CROTALUS DURISSUS TERRIFICUS.                                                                                                                                                                                     | IMMUNE SYSTEM                 |
| 2QOS | CRYSTAL STRUCTURE OF COMPLEMENT PROTEIN C8 IN COMPLEX WITH A PEPTIDE CONTAINING THE C8 BINDING SITE ON C8                                                                                                                                         | RIBOSOME                      |
| 2QOU | CRYSTAL STRUCTURE OF THE BACTERIAL RIBOSOME FROM ESCHERICHIA COLI IN COMPLEX WITH SPECTINOMYCIN. THIS FILE CONTAINS THE 30S SUBUNIT OF THE FIRST 70S RIBOSOME, WITH SPECTINOMYCIN BOUND. THE ENTIRE CRYSTAL STRUCTURE CONTAINS TWO 70S RIBOSOMES. | RIBOSOME                      |
| 2QOV | CRYSTAL STRUCTURE OF THE BACTERIAL RIBOSOME FROM ESCHERICHIA COLI IN COMPLEX WITH SPECTINOMYCIN. THIS FILE CONTAINS THE 50S SUBUNIT OF THE FIRST 70S RIBOSOME. THE ENTIRE CRYSTAL STRUCTURE CONTAINS TWO 70S RIBOSOMES.                           | RIBOSOME                      |
| 2QOW | CRYSTAL STRUCTURE OF THE BACTERIAL RIBOSOME FROM ESCHERICHIA COLI IN COMPLEX WITH SPECTINOMYCIN. THIS FILE CONTAINS THE 30S SUBUNIT OF THE SECOND 70S RIBOSOME, WITH                                                                              | RIBOSOME                      |

| SPECTINOMYCIN BOUND. THE ENTIRE CRYSTAL STRUCTURE CONTAINS TWO 70S RIBOSOMES. |                                                                                                                                                                                                                                                                              |               |
|-------------------------------------------------------------------------------|------------------------------------------------------------------------------------------------------------------------------------------------------------------------------------------------------------------------------------------------------------------------------|---------------|
| 2QOX                                                                          | CRYSTAL STRUCTURE OF THE BACTERIAL RIBOSOME FROM ESCHERICHIA COLI IN COMPLEX WITH SPECTINOMYCIN. THIS FILE CONTAINS THE 50S SUBUNIT OF THE SECOND 70S RIBOSOME. THE ENTIRE CRYSTAL STRUCTURE CONTAINS TWO 70S RIBOSOMES.                                                     | RIBOSOME      |
| 2QOY                                                                          | CRYSTAL STRUCTURE OF THE BACTERIAL RIBOSOME FROM ESCHERICHIA COLI IN COMPLEX WITH SPECTINOMYCIN AND NEOMYCIN. THIS FILE CONTAINS THE 30S SUBUNIT OF THE FIRST 70S RIBOSOME, WITH SPECTINOMYCIN AND NEOMYCIN BOUND. THE ENTIRE CRYSTAL STRUCTURE CONTAINS TWO 70S RIBOSOMES.  | RIBOSOME      |
| 2QOZ                                                                          | CRYSTAL STRUCTURE OF THE BACTERIAL RIBOSOME FROM ESCHERICHIA COLI IN COMPLEX WITH SPECTINOMYCIN AND NEOMYCIN. THIS FILE CONTAINS THE 50S SUBUNIT OF THE FIRST 70S RIBOSOME, WITH NEOMYCIN BOUND. THE ENTIRE CRYSTAL STRUCTURE CONTAINS TWO 70S RIBOSOMES.                    | RIBOSOME      |
| 2QOG                                                                          | CROTOXIN B, THE BASIC PLA2 FROM CROTALUS DURISSUS TERRIFICUS.                                                                                                                                                                                                                | HYDROLASE     |
| 2QOS                                                                          | CRYSTAL STRUCTURE OF COMPLEMENT PROTEIN C8 IN COMPLEX WITH A PEPTIDE CONTAINING THE C8 BINDING SITE ON C8                                                                                                                                                                    | IMMUNE SYSTEM |
| 2QOU                                                                          | CRYSTAL STRUCTURE OF THE BACTERIAL RIBOSOME FROM ESCHERICHIA COLI IN COMPLEX WITH SPECTINOMYCIN. THIS FILE CONTAINS THE 30S SUBUNIT OF THE FIRST 70S RIBOSOME, WITH SPECTINOMYCIN BOUND. THE ENTIRE CRYSTAL STRUCTURE CONTAINS TWO 70S RIBOSOMES.                            | RIBOSOME      |
| 2QOV                                                                          | CRYSTAL STRUCTURE OF THE BACTERIAL RIBOSOME FROM ESCHERICHIA COLI IN COMPLEX WITH SPECTINOMYCIN. THIS FILE CONTAINS THE 50S SUBUNIT OF THE FIRST 70S RIBOSOME. THE ENTIRE CRYSTAL STRUCTURE CONTAINS TWO 70S RIBOSOMES.                                                      | RIBOSOME      |
| 2QOW                                                                          | CRYSTAL STRUCTURE OF THE BACTERIAL RIBOSOME FROM ESCHERICHIA COLI IN COMPLEX WITH SPECTINOMYCIN. THIS FILE CONTAINS THE 30S SUBUNIT OF THE SECOND 70S RIBOSOME, WITH SPECTINOMYCIN BOUND. THE ENTIRE CRYSTAL STRUCTURE CONTAINS TWO 70S RIBOSOMES.                           | RIBOSOME      |
| 2QOX                                                                          | CRYSTAL STRUCTURE OF THE BACTERIAL RIBOSOME FROM ESCHERICHIA COLI IN COMPLEX WITH SPECTINOMYCIN. THIS FILE CONTAINS THE 50S SUBUNIT OF THE SECOND 70S RIBOSOME. THE ENTIRE CRYSTAL STRUCTURE CONTAINS TWO 70S RIBOSOMES.                                                     | RIBOSOME      |
| 2QOY                                                                          | CRYSTAL STRUCTURE OF THE BACTERIAL RIBOSOME FROM ESCHERICHIA COLI IN COMPLEX WITH SPECTINOMYCIN AND NEOMYCIN. THIS FILE CONTAINS THE 30S SUBUNIT OF THE FIRST 70S RIBOSOME, WITH SPECTINOMYCIN AND NEOMYCIN BOUND. THE ENTIRE CRYSTAL STRUCTURE CONTAINS TWO 70S RIBOSOMES.  | RIBOSOME      |
| 2QOZ                                                                          | CRYSTAL STRUCTURE OF THE BACTERIAL RIBOSOME FROM ESCHERICHIA COLI IN COMPLEX WITH SPECTINOMYCIN AND NEOMYCIN. THIS FILE CONTAINS THE 50S SUBUNIT OF THE FIRST 70S RIBOSOME, WITH NEOMYCIN BOUND. THE ENTIRE CRYSTAL STRUCTURE CONTAINS TWO 70S RIBOSOMES.                    | RIBOSOME      |
| 2QP0                                                                          | CRYSTAL STRUCTURE OF THE BACTERIAL RIBOSOME FROM ESCHERICHIA COLI IN COMPLEX WITH SPECTINOMYCIN AND NEOMYCIN. THIS FILE CONTAINS THE 30S SUBUNIT OF THE SECOND 70S RIBOSOME, WITH SPECTINOMYCIN AND NEOMYCIN BOUND. THE ENTIRE CRYSTAL STRUCTURE CONTAINS TWO 70S RIBOSOMES. | RIBOSOME      |

|      |                                                                                                                                                                                                                                                            |                                   |
|------|------------------------------------------------------------------------------------------------------------------------------------------------------------------------------------------------------------------------------------------------------------|-----------------------------------|
| 2QP1 | CRYSTAL STRUCTURE OF THE BACTERIAL RIBOSOME FROM ESCHERICHIA COLI IN COMPLEX WITH SPECTINOMYCIN AND NEOMYCIN. THIS FILE CONTAINS THE 50S SUBUNIT OF THE SECOND 70S RIBOSOME, WITH NEOMYCIN BOUND. THE ENTIRE CRYSTAL STRUCTURE CONTAINS TWO 70S RIBOSOMES. | RIBOSOME                          |
| 2QPD | AN UNEXPECTED OUTCOME OF SURFACE-ENGINEERING AN INTEGRAL MEMBRANE PROTEIN: IMPROVED CRYSTALLIZATION OF CYTOCHROME BA3 OXIDASE FROM THERMUS THERMOPHILUS                                                                                                    | OXIDOREDUCTASE                    |
| 2QPE | AN UNEXPECTED OUTCOME OF SURFACE-ENGINEERING AN INTEGRAL MEMBRANE PROTEIN: IMPROVED CRYSTALLIZATION OF CYTOCHROME BA3 OXIDASE FROM THERMUS THERMOPHILUS                                                                                                    | OXIDOREDUCTASE                    |
| 2QPY | AR LBD WITH SMALL MOLECULE                                                                                                                                                                                                                                 | DNA BINDING PROTEIN               |
| 2QQC | E109Q MUTANT OF PYRUVOYL-DEPENDENT ARGININE DECARBOXYLASE FROM METHANOCOCCUS JANNASHII                                                                                                                                                                     | LYASE                             |
| 2QQD | N47A MUTANT OF PYRUVOYL-DEPENDENT ARGININE DECARBOXYLASE FROM METHANOCOCCUS JANNASHII                                                                                                                                                                      | LYASE                             |
| 2QQF | HST2 BOUND TO ADP-HPD AND ACETYLATED HISTONE H4                                                                                                                                                                                                            | HYDROLASE                         |
| 2QQG | HST2 BOUND TO ADP-HPD, ACETYLLATED HISTONE H4 AND NICOTINAMIDE                                                                                                                                                                                             | HYDROLASE                         |
| 2QQK | NEUROPILIN-2 A1A2B1B2 DOMAINS IN COMPLEX WITH A SEMAPHORIN-BLOCKING FAB                                                                                                                                                                                    | SIGNALING PROTEIN                 |
| 2QQL | NEUROPILIN-2 A1A2B1B2 DOMAINS IN COMPLEX WITH A SEMAPHORIN-BLOCKING FAB                                                                                                                                                                                    | SIGNALING PROTEIN                 |
| 2QQN | NEUROPILIN-1 B1 DOMAIN IN COMPLEX WITH A VEGF-BLOCKING FAB                                                                                                                                                                                                 | SIGNALING PROTEIN                 |
| 2QR0 | STRUCTURE OF VEGF COMPLEXED TO A FAB CONTAINING TYR AND SER IN THE CDRS                                                                                                                                                                                    | IMMUNE SYSTEM                     |
| 2QR1 | CRYSTAL STRUCTURE OF THE ADENYLATE SENSOR FROM AMP-ACTIVATED PROTEIN KINASE IN COMPLEX WITH ADP                                                                                                                                                            | TRANSFERASE                       |
| 2QR9 | CRYSTAL STRUCTURE OF THE ESTROGEN RECEPTOR ALPHA LIGAND BINDING DOMAIN COMPLEXED WITH AN OXABICYCLIC DERIVATIVE COMPOUND                                                                                                                                   | TRANSCRIPTION                     |
| 2QRC | CRYSTAL STRUCTURE OF THE ADENYLATE SENSOR FROM AMP-ACTIVATED PROTEIN KINASE IN COMPLEX WITH ADP AND AMP                                                                                                                                                    | TRANSFERASE                       |
| 2QRD | CRYSTAL STRUCTURE OF THE ADENYLATE SENSOR FROM AMP-ACTIVATED PROTEIN KINASE IN COMPLEX WITH ADP AND ATP                                                                                                                                                    | TRANSFERASE                       |
| 2QRE | CRYSTAL STRUCTURE OF THE ADENYLATE SENSOR FROM AMP-ACTIVATED PROTEIN KINASE IN COMPLEX WITH 5-AMINOIMIDAZOLE-4-CARBOXAMIDE 1-BETA-D-RIBOFURANOTIDE (ZMP)                                                                                                   | TRANSFERASE                       |
| 2QRV | STRUCTURE OF DNMT3A-DNMT3L C-TERMINAL DOMAIN COMPLEX                                                                                                                                                                                                       | TRANSFERASE/TRANSFERASE REGULATOR |
| 2QSC | CRYSTAL STRUCTURE ANALYSIS OF ANTI-HIV-1 V3-FAB F425-B4E8 IN COMPLEX WITH A V3-PEPTIDE                                                                                                                                                                     | IMMUNE SYSTEM                     |
| 2QSE | CRYSTAL STRUCTURE OF THE ESTROGEN RECEPTOR ALPHA LIGAND BINDING DOMAIN COMPLEXED WITH BURNED MEAT COMPOUND 4-OH-PHIP                                                                                                                                       | TRANSCRIPTION                     |
|      |                                                                                                                                                                                                                                                            | DNA BINDING PROTEIN               |

|      |                                                                                                                                                           |                                   |
|------|-----------------------------------------------------------------------------------------------------------------------------------------------------------|-----------------------------------|
| 2QSF | CRYSTAL STRUCTURE OF THE RAD4-RAD23 COMPLEX                                                                                                               | DNA BINDING PROTEIN/DNA           |
| 2QSG | CRYSTAL STRUCTURE OF RAD4-RAD23 BOUND TO A UV-DAMAGED DNA                                                                                                 | DNA BINDING PROTEIN/DNA           |
| 2QSH | CRYSTAL STRUCTURE OF RAD4-RAD23 BOUND TO A MISMATCH DNA                                                                                                   | TRANSPORT PROTEIN                 |
| 2QSP | BOVINE HEMOGLOBIN AT PH 5.7                                                                                                                               | OXYGEN BINDING                    |
| 2QSS | BOVINE HEMOGLOBIN AT PH 6.3                                                                                                                               | PEPTIDE BINDING PROTEIN           |
| 2QT5 | CRYSTAL STRUCTURE OF GRIP1 PDZ12 IN COMPLEX WITH THE FRAS1 PEPTIDE                                                                                        | PROTEIN TRANSPORT                 |
| 2QTV | STRUCTURE OF SEC23-SAR1 COMPLEXED WITH THE ACTIVE FRAGMENT OF SEC31                                                                                       | HYDROLASE                         |
| 2QTW | THE CRYSTAL STRUCTURE OF PCSK9 AT 1.9 ANGSTROMS RESOLUTION REVEALS STRUCTURAL HOMOMOLOGY TO RESISTIN WITHIN THE C-TERMINAL DOMAIN                         | OXYGEN STORAGE, OXYGEN TRANSPORT  |
| 2QU0 | CRYSTAL STRUCTURE DETERMINATION OF SHEEP METHEMOGLOBIN AT 2.7 ANGSTROM RESOLUTION                                                                         | SIGNALING PROTEIN, TRANSFERASE    |
| 2QUR | CRYSTAL STRUCTURE OF F327A/K285P MUTANT OF CAMP-DEPENDENT PROTEIN KINASE                                                                                  | HYDROLASE                         |
| 2QV1 | CRYSTAL STRUCTURE OF HCV NS3-4A V36M MUTANT                                                                                                               | TRANSFERASE/TRANSFERASE REGULATOR |
| 2QVS | CRYSTAL STRUCTURE OF TYPE IIA HOLOENZYME OF CAMP-DEPENDENT PROTEIN KINASE                                                                                 | CHAPERONE                         |
| 2QWN | CRYSTAL STRUCTURE OF DISULFIDE-BOND-CROSSLINKED COMPLEX OF BOVINE HSC70 (1-386AA)R171C AND BOVINE AUXILIN (810-910AA) D876C IN THE ADP*PI STATE           | CHAPERONE                         |
| 2QWO | CRYSTAL STRUCTURE OF DISULFIDE-BOND-CROSSLINKED COMPLEX OF BOVINE HSC70 (1-394AA)R171C AND BOVINE AUXILIN (810-910AA) D876C IN THE ADP*PI FORM #1         | CHAPERONE                         |
| 2QWP | CRYSTAL STRUCTURE OF DISULFIDE-BOND-CROSSLINKED COMPLEX OF BOVINE HSC70 (1-394AA)R171C AND BOVINE AUXILIN (810-910AA) D876C IN THE ADP*PI FORM #2         | CHAPERONE                         |
| 2QWQ | CRYSTAL STRUCTURE OF DISULFIDE-BOND-CROSSLINKED COMPLEX OF BOVINE HSC70 (1-394AA)R171C AND BOVINE AUXILIN (810-910AA) D876C IN THE AMPPNP HYDROLYZED FORM | CHAPERONE                         |
| 2QWR | CRYSTAL STRUCTURE OF DISULFIDE-BOND-CROSSLINKED COMPLEX OF BOVINE HSC70 (1-394AA)R171C AND BOVINE AUXILIN (810-910AA) D876C IN THE AMPPNP INTACT FORM     | TRANSCRIPTION                     |
| 2QXM | CRYSTAL STRUCTURE OF THE ESTROGEN RECEPTOR ALPHA LIGAND BINDING DOMAIN COMPLEXED TO BURNED MEAT COMPOUND PHIP                                             | GENE REGULATION                   |
| 2QXV | STRUCTURAL BASIS OF EZH2 RECOGNITION BY EED                                                                                                               | HYDROLASE                         |
| 2QY0 | ACTIVE DIMERIC STRUCTURE OF THE CATALYTIC DOMAIN OF C1R REVEALS ENZYME-PRODUCT LIKE CONTACTS                                                              | CELL CYCLE                        |
| 2QYF | CRYSTAL STRUCTURE OF THE MAD2/P31(COMET)/MAD2-BINDING PEPTIDE TERNARY COMPLEX                                                                             | HYDROLASE/HYDROLASE INHIBITOR     |
| 2QYI | CRYSTAL STRUCTURE OF A BINARY COMPLEX BETWEEN AN ENGINEERED TRYPSIN INHIBITOR AND BOVINE TRYPSIN                                                          | TRANSCRIPTION                     |

|      |                                                                                                        |                                  |
|------|--------------------------------------------------------------------------------------------------------|----------------------------------|
| 2QZO | CRYSTAL STRUCTURE OF THE ESTROGEN RECEPTOR ALPHA LIGAND BINDING DOMAIN COMPLEXED WITH WAY-169916       | OXIDOREDUCTASE                   |
| 2R00 | CRYSTAL STRUCTURE OF ASPARTATE SEMIALDEHYDE DEHYDROGENASE II COMPLEXED WITH ASA FROM VIBRIO CHOLERAE   | APOPTOSIS                        |
| 2R02 | CRYSTAL STRUCTURE OF ALIX/AIP1 IN COMPLEX WITH THE HIV-1 YPLTSL LATE DOMAIN                            | APOPTOSIS                        |
| 2R03 | CRYSTAL STRUCTURE OF ALIX/AIP1 IN COMPLEX WITH THE YPDL LATE DOMAIN                                    | APOPTOSIS                        |
| 2R05 | CRYSTAL STRUCTURE OF ALIX/AIP1 IN COMPLEX WITH THE HIV-1 YPLASL LATE DOMAIN                            | HYDROLASE, IMMUNE SYSTEM         |
| 2R0K | PROTEASE DOMAIN OF HGFA WITH INHIBITOR FAB58                                                           | HYDROLASE, IMMUNE SYSTEM         |
| 2R0L | SHORT FORM HGFA WITH INHIBITORY FAB75                                                                  | IMMUNE SYSTEM                    |
| 2R0W | PFA2 FAB COMPLEXED WITH ABETA1-8                                                                       | IMMUNE SYSTEM                    |
| 2R0Z | PFA1 FAB COMPLEXED WITH GRIPI PEPTIDE FRAGMENT                                                         | PROTEIN TRANSPORT                |
| 2R17 | FUNCTIONAL ARCHITECTURE OF THE RETROMER CARGO-RECOGNITION COMPLEX                                      | OXYGEN BINDING                   |
| 2R1H | MET-TROUT IV HEMOGLOBIN AT PH 6.3                                                                      | COMPLEX (OXIDOREDUCTASE/PEPTIDE) |
| 2R1R | RIBONUCLEOTIDE REDUCTASE R1 PROTEIN WITH DTTP OCCUPYING THE SPECIFICITY SITE FROM ESCHERICHIA COLI     | PROTEIN BINDING                  |
| 2R1T | DOPAMINE QUINONE CONJUGATION TO DJ-1                                                                   | PROTEIN BINDING                  |
| 2R1V | NOREPINEPHRINE QUINONE CONJUGATION TO DJ-1                                                             | SIGNALING PROTEIN/TRANSFERASE    |
| 2R25 | COMPLEX OF YPD1 AND SLN1-R1 WITH BOUND MG <sup>2+</sup> AND BEF3-                                      | METAL BINDING PROTEIN/HYDROLASE  |
| 2R28 | THE COMPLEX STRUCTURE OF CALMODULIN BOUND TO A CALCINEURIN PEPTIDE                                     | TRANSFERASE                      |
| 2R2L | STRUCTURE OF FARNESYL PROTEIN TRANSFERASE BOUND TO PB-93                                               | HYDROLASE                        |
| 2R2M | 2-(2-CHLORO-6-FLUOROPHENYL)ACETAMIDES AS POTENT THROMBIN INHIBITORS                                    | HORMONE                          |
| 2R34 | CRYSTAL STRUCTURE OF MN HUMAN ARG-INSULIN                                                              | HORMONE                          |
| 2R35 | CRYSTAL STRUCTURE OF RB HUMAN ARG-INSULIN                                                              | HORMONE                          |
| 2R36 | CRYSTAL STRUCTURE OF NI HUMAN ARG-INSULIN                                                              | VIRAL PROTEIN                    |
| 2R3C | STRUCTURE OF THE GP41 N-PEPTIDE IN COMPLEX WITH THE HIV ENTRY INHIBITOR PIE1                           | HYDROLASE/HYDROLASE ACTIVATOR    |
| 2R3Y | CRYSTAL STRUCTURE OF THE DEGS PROTEASE IN COMPLEX WITH THE YWF ACTIVATING PEPTIDE                      | GENE REGULATION                  |
| 2R40 | CRYSTAL STRUCTURE OF 20E BOUND ECR/USP                                                                 | SIGNALING PROTEIN                |
| 2R4R | CRYSTAL STRUCTURE OF THE HUMAN BETA2 ADRENOCEPTOR                                                      | SIGNALING PROTEIN                |
| 2R4S | CRYSTAL STRUCTURE OF THE HUMAN BETA2 ADRENOCEPTOR                                                      | IMMUNE SYSTEM                    |
| 2R56 | CRYSTAL STRUCTURE OF A RECOMBINANT IGE FAB FRAGMENT IN COMPLEX WITH BOVINE BETA-LACTOGLOBULIN ALLERGEN |                                  |

|      |                                                                                                                         |                                     |
|------|-------------------------------------------------------------------------------------------------------------------------|-------------------------------------|
| 2R5B | STRUCTURE OF THE GP41 N-TRIMER IN COMPLEX WITH THE HIV ENTRY INHIBITOR PIE7                                             | VIRAL PROTEIN                       |
| 2R5C | AEDES KYNURENINE AMINOTRANSFERASE IN COMPLEX WITH CYSTEINE                                                              | TRANSFERASE                         |
| 2R5D | STRUCTURE OF THE GP41 N-TRIMER IN COMPLEX WITH THE HIV ENTRY INHIBITOR PIE7                                             | VIRAL PROTEIN                       |
| 2R5Y | STRUCTURE OF SCR/EXD COMPLEX BOUND TO A CONSENSUS HOX-EXD SITE                                                          | TRANSCRIPTION/DNA                   |
| 2R5Z | STRUCTURE OF SCR/EXD COMPLEX BOUND TO A DNA SEQUENCE DERIVED FROM THE FKH GENE                                          | TRANSCRIPTION/DNA                   |
| 2R6A | CRYSTAL FORM BH1                                                                                                        | REPLICATION                         |
| 2R6C | CRYSTAL FORM BH2                                                                                                        | REPLICATION                         |
| 2R6G | THE CRYSTAL STRUCTURE OF THE E. COLI MALTOSE TRANSPORTER                                                                | HYDROLASE/TRANSPORT PROTEIN         |
| 2R7G | STRUCTURE OF THE RETINOBLASTOMA PROTEIN POCKET DOMAIN IN COMPLEX WITH ADENOVIRUS E1A CR1 DOMAIN                         | TRANSCRIPTION REPRESSOR, CELL CYCLE |
| 2R7Z | CISPLATIN LESION CONTAINING RNA POLYMERASE II ELONGATION COMPLEX                                                        | TRANSCRIPTION, TRANSFERASE/DNA/RNA  |
| 2R80 | PIGEON HEMOGLOBIN (OXY FORM)                                                                                            | OXYGEN BINDING                      |
| 2R8S | HIGH RESOLUTION STRUCTURE OF A SPECIFIC SYNTHETIC FAB BOUND TO P4-P6 RNA RIBOZYME DOMAIN                                | IMMUNE SYSTEM/RNA                   |
| 2R92 | ELONGATION COMPLEX OF RNA POLYMERASE II WITH ARTIFICIAL RDRP SCAFFOLD                                                   | TRANSFERASE/RNA                     |
| 2R93 | ELONGATION COMPLEX OF RNA POLYMERASE II WITH A HEPATITIS DELTA VIRUS-DERIVED RNA STEM LOOP                              | TRANSFERASE/RNA                     |
| 2R9B | STRUCTURAL ANALYSIS OF PLASMEPSIN 2 FROM PLASMODIUM FALCIPARUM COMPLEXED WITH A PEPTIDE-BASED INHIBITOR                 | HYDROLASE                           |
| 2R9H | CRYSTAL STRUCTURE OF Q207C MUTANT OF CLC-EC1 IN COMPLEX WITH FAB                                                        | MEMBRANE PROTEIN                    |
| 2R9K | CRYSTAL STRUCTURE OF MISTELTOE LECTIN I IN COMPLEX WITH PHLORETAMIDE                                                    | HYDROLASE                           |
| 2R9P | HUMAN MESOTRYPSIN COMPLEXED WITH BOVINE PANCREATIC TRYPSIN INHIBITOR(BPTI)                                              | HYDROLASE/HYDROLASE INHIBITOR       |
| 2R9Q | CRYSTAL STRUCTURE OF 2'-DEOXYCYTIDINE 5'-TRIPHOSPHATE DEAMINASE FROM AGROBACTERIUM TUMEFACIENS                          | HYDROLASE                           |
| 2R9R | SHAKER FAMILY VOLTAGE DEPENDENT POTASSIUM CHANNEL (KV1.2-KV2.1 PADDLE CHIMERA CHANNEL) IN ASSOCIATION WITH BETA SUBUNIT | MEMBRANE PROTEIN, TRANSPORT PROTEIN |
| 2RA0 | X-RAY STRUCTURE OF FXA IN COMPLEX WITH 7-FLUOROINDAZOLE                                                                 | HYDROLASE                           |
| 2RAO | X RAY CRYSTAL STRUCTURE OF RABBIT HEMOGLOBIN (OXY FORM) AT 2.0 ANGSTROM RESOLUTION                                      | OXYGEN BINDING                      |
| 2RAW | CRYSTAL STRUCTURE OF THE BOREALIN-SURVIVIN COMPLEX                                                                      | CELL CYCLE                          |
| 2RAX | CRYSTAL STRUCTURE OF BOREALIN (20-78) BOUND TO SURVIVIN (1-                                                             | CELL CYCLE                          |

120)

|      |                                                                                                                                                                   |                                    |
|------|-------------------------------------------------------------------------------------------------------------------------------------------------------------------|------------------------------------|
| 2RCR | STRUCTURE OF THE MEMBRANE-BOUND PROTEIN PHOTOSYNTHETIC REACTION CENTER FROM RHODOBACTER SPHAEROIDES                                                               | PHOTOSYNTHETIC REACTION CENTER     |
| 2RCS | IMMUNOGLOBULIN 48G7 GERMLINE FAB-AFFINITY MATURATION OF AN ESTEROLYTIC ANTIBODY                                                                                   | GERMLINE ANTIBODY                  |
| 2RD0 | STRUCTURE OF A HUMAN P110ALPHA/P85ALPHA COMPLEX                                                                                                                   | TRANSFERASE/ONCOPROTEIN            |
| 2RD4 | DESIGN OF SPECIFIC INHIBITORS OF PHOSPHOLIPASE A2: CRYSTAL STRUCTURE OF THE COMPLEX OF PHOSPHOLIPASE A2 WITH PENTAPEPTIDE LEU-VAL-PHE-PHE-ALA AT 2.9 Å RESOLUTION | HYDROLASE                          |
| 2RD5 | STRUCTURAL BASIS FOR THE REGULATION OF N-ACETYLGLUTAMATE KINASE BY PII IN ARABIDOPSIS THALIANA                                                                    | PROTEIN BINDING                    |
| 2RD7 | HUMAN COMPLEMENT MEMBRANE ATTACK PROTEINS SHARE A COMMON FOLD WITH BACTERIAL CYTOLYSINS                                                                           | IMMUNE SYSTEM                      |
| 2RD8 | HUMAN THYMIDYLATE SYNTHASE STABILIZED IN ACTIVE CONFORMATION BY R163K MUTATION: ASYMMETRY AND REACTIVITY OF CYS195                                                | TRANSFERASE                        |
| 2RDB | X-RAY CRYSTAL STRUCTURE OF TOLUENE/O-XYLENE MONOOXYGENASE HYDROXYLASE I100W MUTANT                                                                                | OXIDOREDUCTASE                     |
| 2RDD | X-RAY CRYSTAL STRUCTURE OF ACRB IN COMPLEX WITH A NOVEL TRANSMEMBRANE HELIX.                                                                                      | MEMBRANE PROTEIN/TRANSPORT PROTEIN |
| 2REM | CRYSTAL STRUCTURE OF OXIDOREDUCTASE DSBA FROM XYLELLA FASTIDIOSA                                                                                                  | OXIDOREDUCTASE                     |
| 2REQ | METHYLMALONYL-COA MUTASE, NON-PRODUCTIVE COA COMPLEX, IN OPEN CONFORMATION REPRESENTING SUBSTRATE-FREE STATE                                                      | ISOMERASE                          |
| 2RET | THE CRYSTAL STRUCTURE OF A BINARY COMPLEX OF TWO PSEUDOPILINS: EPSI AND EPSJ FROM THE TYPE 2 SECRETION SYSTEM OF VIBRIO VULNIFICUS                                | PROTEIN TRANSPORT                  |
| 2REX | CRYSTAL STRUCTURE OF THE EFFECTOR DOMAIN OF PLXNB1 BOUND WITH RND1 GTPASE                                                                                         | SIGNALING PROTEIN/LIPOPROTEIN      |
| 2RF2 | HIV REVERSE TRANSCRIPTASE IN COMPLEX WITH INHIBITOR 7E (NNRTI)                                                                                                    | TRANSFERASE                        |
| 2RF4 | CRYSTAL STRUCTURE OF THE RNA POLYMERASE I SUBCOMPLEX A14/43                                                                                                       | TRANSFERASE                        |
| 2RF9 | CRYSTAL STRUCTURE OF THE COMPLEX BETWEEN THE EGFR KINASE DOMAIN AND A MIG6 PEPTIDE                                                                                | TRANSFERASE                        |
| 2RFD | CRYSTAL STRUCTURE OF THE COMPLEX BETWEEN THE EGFR KINASE DOMAIN AND A MIG6 PEPTIDE                                                                                | TRANSFERASE                        |
| 2RFE | CRYSTAL STRUCTURE OF THE COMPLEX BETWEEN THE EGFR KINASE DOMAIN AND A MIG6 PEPTIDE                                                                                | TRANSFERASE                        |
| 2RFI | CRYSTAL STRUCTURE OF CATALYTIC DOMAIN OF HUMAN EUCHROMATIC HISTONE METHYLTRANSFERASE 1 IN COMPLEX WITH SAH AND DIMETHYLATED H3K9 PEPTIDE                          | TRANSFERASE                        |
| 2RFK | SUBSTRATE RNA POSITIONING IN THE ARCHAEAL H/ACA RIBONUCLEOPROTEIN COMPLEX                                                                                         | ISOMERASE/RNA                      |
| 2RFT | CRYSTAL STRUCTURE OF INFLUENZA B VIRUS HEMAGGLUTININ IN                                                                                                           | VIRAL PROTEIN                      |

| COMPLEX WITH LSTA RECEPTOR ANALOG |                                                                                                                                                                      |                                       |
|-----------------------------------|----------------------------------------------------------------------------------------------------------------------------------------------------------------------|---------------------------------------|
| 2RFU                              | CRYSTAL STRUCTURE OF INFLUENZA B VIRUS HEMAGGLUTININ IN COMPLEX WITH LSTC RECEPTOR ANALOG                                                                            | VIRAL PROTEIN                         |
| 2RFX                              | CRYSTAL STRUCTURE OF HLA-B*5701, PRESENTING THE SELF PEPTIDE, LSSPVTKSF                                                                                              | IMMUNE SYSTEM                         |
| 2RG9                              | CRYSTAL STRUCTURE OF VISCUM ALBUM MISTLETOE LECTIN I IN NATIVE STATE AT 1.95 A RESOLUTION, COMPARISON OF STRUCTURE ACTIVE SITE CONFORMATION IN RICIN AND IN VISCUMIN | HYDROLASE, TOXIN                      |
| 2RGN                              | CRYSTAL STRUCTURE OF P63RHOGEF COMPLEX WITH GALPHA-Q AND RHOA                                                                                                        | SIGNALING PROTEIN COMPLEX             |
| 2RH9                              | TRYPTOPHAN SYNTHASE COMPLEXED WITH IGP, INTERNAL ALDIMINE, PH 9.0                                                                                                    | LYASE                                 |
| 2RHG                              | TRYPTOPHAN SYNTHASE COMPLEXED WITH IGP, PH 7.0, INTERNAL ALDIMINE                                                                                                    | LYASE                                 |
| 2RHK                              | CRYSTAL STRUCTURE OF INFLUENZA A NS1A PROTEIN IN COMPLEX WITH F2F3 FRAGMENT OF HUMAN CELLULAR FACTOR CPSF30                                                          | VIRAL PROTEIN/NUCLEAR PROTEIN         |
| 2RHQ                              | PHERS FROM STAPHYLOCOCCUS HAEMOLYTICUS- RATIONAL PROTEIN ENGINEERING AND INHIBITOR STUDIES                                                                           | LIGASE                                |
| 2RHS                              | PHERS FROM STAPHYLOCOCCUS HAEMOLYTICUS- RATIONAL PROTEIN ENGINEERING AND INHIBITOR STUDIES                                                                           | LIGASE                                |
| 2RI4                              | CRYSTAL STRUCTURE DETERMINATION OF GOAT METHEMOGLOBIN AT 2.7 ANGSTROM                                                                                                | OXYGEN STORAGE, OXYGEN TRANSPORT      |
| 2RI7                              | CRYSTAL STRUCTURE OF PHD FINGER-LINKER-BROMODOMAIN Y17E MUTANT FROM HUMAN BPTF IN THE H3(1-9)K4ME2 BOUND STATE                                                       | TRANSCRIPTION/NUCLEAR PROTEIN         |
| 2RII                              | CRYSTAL STRUCTURE OF HUMAN PEROXIREDOXIN I IN COMPLEX WITH SULFIREDOXIN                                                                                              | OXIDOREDUCTASE COMPLEX                |
| 2RIV                              | CRYSTAL STRUCTURE OF THE REACTIVE LOOP CLEAVED HUMAN THYROXINE BINDING GLOBULIN                                                                                      | SIGNALING PROTEIN                     |
| 2RIW                              | THE REACTIVE LOOP CLEAVED HUMAN THYROXINE BINDING GLOBULIN COMPLEXED WITH THYROXINE                                                                                  | SIGNALING PROTEIN                     |
| 2RJE                              | CRYSTAL STRUCTURE OF L3MBTL1 IN COMPLEX WITH H4K20ME2 (RESIDUES 17-25), ORTHORHOMBIC FORM II                                                                         | TRANSCRIPTION                         |
| 2RJF                              | CRYSTAL STRUCTURE OF L3MBTL1 IN COMPLEX WITH H4K20ME2 (RESIDUES 12-30), ORTHORHOMBIC FORM I                                                                          | TRANSCRIPTION                         |
| 2RK1                              | CRYSTAL STRUCTURE OF HIV-1 REVERSE TRANSCRIPTASE (RT) IN COMPLEX WITH A TRIAZOLE DERIVED NNRTI                                                                       | TRANSFERASE                           |
| 2RKM                              | STRUCTURE OF OPPA COMPLEXED WITH LYS-LYS                                                                                                                             | COMPLEX (BINDING PROTEIN/DIPEPTIDE)   |
| 2RLN                              | THERMODYNAMIC AND STRUCTURAL CONSEQUENCES OF CHANGING A SULPHUR ATOM TO A METHYLENE GROUP IN THE M13NLE MUTATION IN RIBONUCLEASE S                                   | HYDROLASE(PHOSPHORIC DIESTER,RNA)     |
| 2RMA                              | CRYSTAL STRUCTURES OF CYCLOPHILIN A COMPLEXED WITH CYCLOSPORIN A AND N-METHYL-4-[(E)-2-BUTENYL]-4,4-DIMETHYLTHREONINE CYCLOSPORIN A                                  | COMPLEX (ISOMERASE/IMMUNOSUPPRESSANT) |
| 2RMB                              | CRYSTAL STRUCTURES OF CYCLOPHILIN A COMPLEXED WITH                                                                                                                   | COMPLEX (ISOMERASE/IMMUNOSUPPRESSANT) |



|      | CYCLOSPORIN A AND N-METHYL-4-[(E)-2-BUTENYL]-4,4-DIMETHYLTHREONINE CYCLOSPORIN A                                                                                                                    |                                       |
|------|-----------------------------------------------------------------------------------------------------------------------------------------------------------------------------------------------------|---------------------------------------|
| 2RMC | CRYSTAL STRUCTURE OF MURINE CYCLOPHILIN C COMPLEXED WITH IMMUNOSUPPRESSIVE DRUG CYCLOSPORIN A                                                                                                       | COMPLEX (ISOMERASE/IMMUNOSUPPRESSANT) |
| 2ROD | SOLUTION STRUCTURE OF MCL-1 COMPLEXED WITH NOXAA                                                                                                                                                    | APOPTOSIS                             |
| 2SCU | A DETAILED DESCRIPTION OF THE STRUCTURE OF SUCCINYL-COA SYNTHETASE FROM ESCHERICHIA COLI                                                                                                            | LIGASE                                |
| 2SEB | X-RAY CRYSTAL STRUCTURE OF HLA-DR4 COMPLEXED WITH A PEPTIDE FROM HUMAN COLLAGEN II                                                                                                                  | COMPLEX (MHC CLASS II/SUPERANTIGEN)   |
| 2SEC | STRUCTURAL COMPARISON OF TWO SERINE PROTEINASE-PROTEIN INHIBITOR COMPLEXES. EGLIN-C-SUBTILISIN CARLSBERG AND CI-2-SUBTILISIN NOVO                                                                   | COMPLEX(SERINE PROTEINASE-INHIBITOR)  |
| 2SGD | ASP 18 VARIANT OF TURKEY OVOMUCOID INHIBITOR THIRD DOMAIN COMPLEXED WITH STREPTOMYCES GRISEUS PROTEINASE B AT PH 10.7                                                                               | HYDROLASE/HYDROLASE INHIBITOR         |
| 2SGE | GLU 18 VARIANT OF TURKEY OVOMUCOID INHIBITOR THIRD DOMAIN COMPLEXED WITH STREPTOMYCES GRISEUS PROTEINASE B AT PH 10.7                                                                               | HYDROLASE/HYDROLASE INHIBITOR         |
| 2SGF | PHE 18 VARIANT OF TURKEY OVOMUCOID INHIBITOR THIRD DOMAIN COMPLEXED WITH STREPTOMYCES GRISEUS PROTEINASE B                                                                                          | HYDROLASE/HYDROLASE INHIBITOR         |
| 2SGP | PRO 18 VARIANT OF TURKEY OVOMUCOID INHIBITOR THIRD DOMAIN COMPLEXED WITH STREPTOMYCES GRISEUS PROTEINASE B AT PH 6.5                                                                                | HYDROLASE/INHIBITOR                   |
| 2SGQ | GLN 18 VARIANT OF TURKEY OVOMUCOID INHIBITOR THIRD DOMAIN COMPLEXED WITH STREPTOMYCES GRISEUS PROTEINASE B AT PH 6.5                                                                                | HYDROLASE/HYDROLASE INHIBITOR         |
| 2SIC | REFINED CRYSTAL STRUCTURE OF THE COMPLEX OF SUBTILISIN BPN' AND STREPTOMYCES SUBTILISIN INHIBITOR AT 1.8 ANGSTROMS RESOLUTION                                                                       | COMPLEX (PROTEINASE/INHIBITOR)        |
| 2SIV | SIV GP41 CORE STRUCTURE                                                                                                                                                                             | ENVELOPE GLYCOPROTEIN                 |
| 2SNI | STRUCTURAL COMPARISON OF TWO SERINE PROTEINASE-PROTEIN INHIBITOR COMPLEXES. EGLIN-C-SUBTILISIN CARLSBERG AND CI-2-SUBTILISIN NOVO                                                                   | COMPLEX (PROTEINASE/INHIBITOR)        |
| 2STA | ANIONIC SALMON TRYPSIN IN COMPLEX WITH SQUASH SEED INHIBITOR (CUCURBITA MAXIMA TRYPSIN INHIBITOR I)                                                                                                 | HYDROLASE/HYDROLASE INHIBITOR         |
| 2TCI | X-RAY CRYSTALLOGRAPHIC STUDIES ON HEXAMERIC INSULINS IN THE PRESENCE OF HELIX-STABILIZING AGENTS, THIOCYANATE, METHYLPARABEN AND PHENOL                                                             | HORMONE                               |
| 2TEC | MOLECULAR DYNAMICS REFINEMENT OF A THERMITASE-EGLIN-C COMPLEX AT 1.98 ANGSTROMS RESOLUTION AND COMPARISON OF TWO CRYSTAL FORMS THAT DIFFER IN CALCIUM CONTENT                                       | COMPLEX(SERINE PROTEINASE-INHIBITOR)  |
| 2THF | STRUCTURE OF HUMAN ALPHA-THROMBIN Y225F MUTANT BOUND TO D-PHE-PRO-ARG-CHLOROMETHYLKETONE                                                                                                            | SERINE PROTEASE                       |
| 2TLX | THERMOLYSIN (NATIVE)                                                                                                                                                                                | HYDROLASE                             |
| 2TRC | PHOSDUCIN/TRANSDUCIN BETA-GAMMA COMPLEX                                                                                                                                                             | COMPLEX (TRANSDUCER/TRANSDUCTION)     |
| 2TRS | CRYSTAL STRUCTURES OF MUTANT (BETAK87T) TRYPTOPHAN SYNTHASE ALPHA2 BETA2 COMPLEX WITH LIGANDS BOUND TO THE ACTIVE SITES OF THE ALPHA AND BETA SUBUNITS REVEAL LIGAND-INDUCED CONFORMATIONAL CHANGES | LYASE                                 |

|      |                                                                                                                                                                                                     |                               |
|------|-----------------------------------------------------------------------------------------------------------------------------------------------------------------------------------------------------|-------------------------------|
| 2TSY | CRYSTAL STRUCTURES OF MUTANT (BETAK87T) TRYPTOPHAN SYNTHASE ALPHA2 BETA2 COMPLEX WITH LIGANDS BOUND TO THE ACTIVE SITES OF THE ALPHA AND BETA SUBUNITS REVEAL LIGAND-INDUCED CONFORMATIONAL CHANGES | LYASE                         |
| 2TYS | CRYSTAL STRUCTURES OF MUTANT (BETAK87T) TRYPTOPHAN SYNTHASE ALPHA2 BETA2 COMPLEX WITH LIGANDS BOUND TO THE ACTIVE SITES OF THE ALPHA AND BETA SUBUNITS REVEAL LIGAND-INDUCED CONFORMATIONAL CHANGES | LYASE                         |
| 2UBP | STRUCTURE OF NATIVE UREASE FROM BACILLUS PASTEURII                                                                                                                                                  | HYDROLASE                     |
| 2UU9 | STRUCTURE OF THE THERMUS THERMOPHILUS 30S RIBOSOMAL SUBUNIT COMPLEXED WITH A VALINE-ASL WITH CMO5U IN POSITION 34 BOUND TO AN MRNA WITH A GUG-CODON IN THE A-SITE AND PAROMOMYCIN.                  | RIBOSOME                      |
| 2UUA | STRUCTURE OF THE THERMUS THERMOPHILUS 30S RIBOSOMAL SUBUNIT COMPLEXED WITH A VALINE-ASL WITH CMO5U IN POSITION 34 BOUND TO AN MRNA WITH A GUC-CODON IN THE A-SITE AND PAROMOMYCIN.                  | RIBOSOME                      |
| 2UUB | STRUCTURE OF THE THERMUS THERMOPHILUS 30S RIBOSOMAL SUBUNIT COMPLEXED WITH A VALINE-ASL WITH CMO5U IN POSITION 34 BOUND TO AN MRNA WITH A GUU-CODON IN THE A-SITE AND PAROMOMYCIN.                  | RIBOSOME                      |
| 2UUC | STRUCTURE OF THE THERMUS THERMOPHILUS 30S RIBOSOMAL SUBUNIT COMPLEXED WITH A VALINE-ASL WITH CMO5U IN POSITION 34 BOUND TO AN MRNA WITH A GUA-CODON IN THE A-SITE AND PAROMOMYCIN.                  | RIBOSOME                      |
| 2UUE | REPLACE: A STRATEGY FOR ITERATIVE DESIGN OF CYCLIN BINDING GROOVE INHIBITORS                                                                                                                        | TRANSFERASE                   |
| 2UUF | THROMBIN-HIRUGEN BINARY COMPLEX AT 1.26A RESOLUTION                                                                                                                                                 | BLOOD CLOTTING                |
| 2UUG | ESCHERICHIA COLI URACIL-DNA GLYCOSYLASE:INHIBITOR COMPLEX WITH H187D MUTANT UDG AND WILD-TYPE UGI                                                                                                   | REPLICATION, HYDROLASE        |
| 2UUJ | THROMBIN-HIRUGEN-GW473178 TERNARY COMPLEX AT 1.32A RESOLUTION                                                                                                                                       | BLOOD CLOTTING                |
| 2UUK | THROMBIN-HIRUGEN-GW420128 TERNARY COMPLEX AT 1.39A RESOLUTION                                                                                                                                       | BLOOD CLOTTING                |
| 2UUM | CRYSTAL STRUCTURE OF C-PHYCOCYANIN FROM PHORMIDIUM, LYNGBYA SPP. (MARINE) AND SPIRULINA SP. (FRESH WATER) SHOWS TWO DIFFERENT WAYS OF ENERGY TRANSFER BETWEEN TWO HEXAMERS.                         | ELECTRON TRANSPORT            |
| 2UUN | CRYSTAL STRUCTURE OF C-PHYCOCYANIN FROM PHORMIDIUM, LYNGBYA SPP. (MARINE) AND SPIRULINA SP. (FRESH WATER) SHOWS TWO DIFFERENT WAYS OF ENERGY TRANSFER BETWEEN TWO HEXAMERS.                         | ELECTRON TRANSPORT            |
| 2UVP | CRYSTAL STRUCTURE OF HOBA (HP1230)FROM HELICOBACTER PYLORI                                                                                                                                          | UNKNOWN FUNCTION              |
| 2UVX | STRUCTURE OF PKA-PKB CHIMERA COMPLEXED WITH 7-AZAINDOLE                                                                                                                                             | TRANSFERASE/INHIBITOR COMPLEX |
| 2UVY | STRUCTURE OF PKA-PKB CHIMERA COMPLEXED WITH METHYL-(4-(9H-PURIN-6-YL)-BENZYL)-AMINE                                                                                                                 | TRANSFERASE/INHIBITOR COMPLEX |
| 2UVZ | STRUCTURE OF PKA-PKB CHIMERA COMPLEXED WITH C-PHENYL-C-(4-(9H-PURIN-6-YL)-PHENYL)-METHYLAMINE                                                                                                       | TRANSFERASE/INHIBITOR COMPLEX |

|      |                                                                                                                                                 |                               |
|------|-------------------------------------------------------------------------------------------------------------------------------------------------|-------------------------------|
| 2UW0 | STRUCTURE OF PKA-PKB CHIMERA COMPLEXED WITH 6-(4-(4-CHLORO-PHENYL)-PIPERIDIN-4-YL)-PHENYL)-9H-PURINE                                            | OXIDOREDUCTASE                |
| 2UW1 | IVY DESATURASE STRUCTURE                                                                                                                        | TRANSFERASE/INHIBITOR COMPLEX |
| 2UW3 | STRUCTURE OF PKA-PKB CHIMERA COMPLEXED WITH 5-METHYL-4-PHENYL-1H-PYRAZOLE                                                                       | TRANSFERASE                   |
| 2UW4 | STRUCTURE OF PKA-PKB CHIMERA COMPLEXED WITH 2-(4-(5-METHYL-1H-PYRAZOL-4-YL)-PHENYL)-ETHYLAMINE                                                  | TRANSFERASE/INHIBITOR COMPLEX |
| 2UW5 | STRUCTURE OF PKA-PKB CHIMERA COMPLEXED WITH (R)-2-(4-CHLORO-PHENYL)-2-(4-1H-PYRAZOL-4-YL)-PHENYL)-ETHYLAMINE                                    | TRANSFERASE/INHIBITOR COMPLEX |
| 2UW6 | STRUCTURE OF PKA-PKB CHIMERA COMPLEXED WITH (S)-2-(4-CHLORO-PHENYL)-2-(4-1H-PYRAZOL-4-YL)-PHENYL)-ETHYLAMINE                                    | TRANSFERASE/INHIBITOR COMPLEX |
| 2UW7 | STRUCTURE OF PKA-PKB CHIMERA COMPLEXED WITH 4-(4-CHLORO-PHENYL)-4-(4-(1H-PYRAZOL-4-YL)-PHENYL)-PIPERIDINE                                       | TRANSFERASE/INHIBITOR COMPLEX |
| 2UW8 | STRUCTURE OF PKA-PKB CHIMERA COMPLEXED WITH 2-(4-CHLORO-PHENYL)-2-PHENYL-ETHYLAMINE                                                             | TRANSFERASE/INHIBITOR COMPLEX |
| 2UW9 | STRUCTURE OF PKB-BETA (AKT2) COMPLEXED WITH 4-(4-CHLORO-PHENYL)-4-(4-(1H-PYRAZOL-4-YL)-PHENYL)-PIPERIDINE                                       | IMMUNE SYSTEM                 |
| 2UWE | LARGE CDR3A LOOP ALTERATION AS A FUNCTION OF MHC MUTATION                                                                                       | CHAPERONE                     |
| 2UWJ | STRUCTURE OF THE HETEROTRIMERIC COMPLEX WHICH REGULATES TYPE III SECRETION NEEDLE FORMATION                                                     | HYDROLASE                     |
| 2UWL | SELECTIVE AND DUAL ACTION ORALLY ACTIVE INHIBITORS OF THROMBIN AND FACTOR XA                                                                    | HYDROLASE                     |
| 2UWO | SELECTIVE AND DUAL ACTION ORALLY ACTIVE INHIBITORS OF THROMBIN AND FACTOR XA                                                                    | HYDROLASE                     |
| 2UWP | FACTOR XA INHIBITOR COMPLEX                                                                                                                     | PHOTOSYNTHESIS                |
| 2UWS | X-RAY HIGH RESOLUTION STRUCTURE OF THE PHOTOSYNTHETIC REACTION CENTER FROM RB. SPHAEROIDES AT PH 6.5 IN THE CHARGE-SEPARATED STATE              | PHOTOSYNTHESIS                |
| 2UWT | X-RAY HIGH RESOLUTION STRUCTURE OF THE PHOTOSYNTHETIC REACTION CENTER FROM RB. SPHAEROIDES AT PH 6.5 IN THE CHARGE-SEPARATED STATE 2ND DATASET  | PHOTOSYNTHESIS                |
| 2UWU | X-RAY HIGH RESOLUTION STRUCTURE OF THE PHOTOSYNTHETIC REACTION CENTER FROM RB. SPHAEROIDES AT PH 6.5 IN THE NEUTRAL STATE, 2ND DATASET          | PHOTOSYNTHESIS                |
| 2UWV | X-RAY HIGH RESOLUTION STRUCTURE OF THE PHOTOSYNTHETIC REACTION CENTER FROM RB. SPHAEROIDES AT PH 6.5 IN THE CHARGE-SEPARATED STATE, 3RD DATASET | PHOTOSYNTHESIS                |
| 2UWW | X-RAY HIGH RESOLUTION STRUCTURE OF THE PHOTOSYNTHETIC REACTION CENTER FROM RB. SPHAEROIDES AT PH 6.5 IN THE NEUTRAL STATE                       | PHOTOSYNTHESIS                |
| 2UX3 | X-RAY HIGH RESOLUTION STRUCTURE OF THE PHOTOSYNTHETIC REACTION CENTER FROM RB. SPHAEROIDES AT PH 9 IN THE NEUTRAL STATE                         | PHOTOSYNTHESIS                |
| 2UX4 | X-RAY HIGH RESOLUTION STRUCTURE OF THE PHOTOSYNTHETIC REACTION CENTER FROM RB. SPHAEROIDES AT PH 9 IN THE CHARGE-                               | PHOTOSYNTHESIS                |

| SEPARATED STATE, 2ND DATASET |                                                                                                                                                         |                                  |
|------------------------------|---------------------------------------------------------------------------------------------------------------------------------------------------------|----------------------------------|
| 2UX5                         | X-RAY HIGH RESOLUTION STRUCTURE OF THE PHOTOSYNTHETIC REACTION CENTER FROM RB. SPHAEROIDES AT PH 9 IN THE CHARGE-SEPARATED STATE                        | PHOTOSYNTHESIS                   |
| 2UXB                         | CRYSTAL STRUCTURE OF AN EXTENDED TRNA ANTICODON STEM LOOP IN COMPLEX WITH ITS COGNATE MRNA GGGU IN THE CONTEXT OF THE THERMUS THERMOPHILUS 30S SUBUNIT. | RIBOSOME                         |
| 2UXC                         | CRYSTAL STRUCTURE OF AN EXTENDED TRNA ANTICODON STEM LOOP IN COMPLEX WITH ITS COGNATE MRNA UCGU IN THE CONTEXT OF THE THERMUS THERMOPHILUS 30S SUBUNIT. | RIBOSOME                         |
| 2UXD                         | CRYSTAL STRUCTURE OF AN EXTENDED TRNA ANTICODON STEM LOOP IN COMPLEX WITH ITS COGNATE MRNA CGGG IN THE CONTEXT OF THE THERMUS THERMOPHILUS 30S SUBUNIT. | RIBOSOME                         |
| 2UXJ                         | X-RAY HIGH RESOLUTION STRUCTURE OF THE PHOTOSYNTHETIC REACTION CENTER FROM RB. SPHAEROIDES AT PH 10 IN THE NEUTRAL STATE                                | PHOTOSYNTHESIS                   |
| 2UXK                         | X-RAY HIGH RESOLUTION STRUCTURE OF THE PHOTOSYNTHETIC REACTION CENTER FROM RB. SPHAEROIDES AT PH 10 IN THE CHARGE-SEPARATED STATE                       | PHOTOSYNTHESIS                   |
| 2UXL                         | X-RAY HIGH RESOLUTION STRUCTURE OF THE PHOTOSYNTHETIC REACTION CENTER FROM RB. SPHAEROIDES AT PH 10 IN THE NEUTRAL STATE, 2ND DATASET                   | PHOTOSYNTHESIS                   |
| 2UXM                         | X-RAY HIGH RESOLUTION STRUCTURE OF THE PHOTOSYNTHETIC REACTION CENTER FROM RB. SPHAEROIDES AT PH 10 IN THE CHARGE-SEPARATED STATE, 2ND DATASET          | PHOTOSYNTHESIS                   |
| 2UXN                         | STRUCTURAL BASIS OF HISTONE DEMETHYLATION BY LSD1 REVEALED BY SUICIDE INACTIVATION                                                                      | OXIDOREDUCTASE/REPRESSOR COMPLEX |
| 2UXX                         | HUMAN LSD1 HISTONE DEMETHYLASE-COREST IN COMPLEX WITH AN FAD-TRANSLCYPRIMINE ADDUCT                                                                     | OXIDOREDUCTASE/REPRESSOR         |
| 2UY1                         | CRYSTAL STRUCTURE OF CSTF-77                                                                                                                            | RNA-BINDING PROTEIN              |
| 2UY6                         | CRYSTAL STRUCTURE OF THE P PILUS ROD SUBUNIT PAPA                                                                                                       | CHAPERONE                        |
| 2UY7                         | CRYSTAL STRUCTURE OF THE P PILUS ROD SUBUNIT PAPA                                                                                                       | CHAPERONE                        |
| 2UYL                         | CRYSTAL STRUCTURE OF A MONOCLONAL ANTIBODY DIRECTED AGAINST AN ANTIGENIC DETERMINANT COMMON TO OGAWA AND INABA SEROTYPES OF VIBRIO CHOLERAEE O1         | IMMUNE SYSTEM                    |
| 2UYN                         | CRYSTAL STRUCTURE OF E. COLI TDCF WITH BOUND 2-KETOBUTYRATE                                                                                             | UNKNOWN FUNCTION                 |
| 2UYZ                         | NON-COVALENT COMPLEX BETWEEN UBC9 AND SUMO1                                                                                                             | LIGASE                           |
| 2UZ1                         | 1.65 ANGSTROM STRUCTURE OF BENZALDEHYDE LYASE COMPLEXED WITH 2-METHYL-2,4-PENTANEDIOL                                                                   | LYASE                            |
| 2UZ6                         | ACHBP-TARGETED A-CONOTOXIN CORRELATES DISTINCT BINDING ORIENTATIONS WITH NACHR SUBTYPE SELECTIVITY.                                                     | RECEPTOR                         |
| 2UZB                         | CRYSTAL STRUCTURE OF HUMAN CDK2 COMPLEXED WITH A THIAZOLIDINONE INHIBITOR                                                                               | TRANSFERASE                      |
| 2UZD                         | CRYSTAL STRUCTURE OF HUMAN CDK2 COMPLEXED WITH A THIAZOLIDINONE INHIBITOR                                                                               | TRANSFERASE                      |

|      |                                                                                                                                                       |                                    |
|------|-------------------------------------------------------------------------------------------------------------------------------------------------------|------------------------------------|
| 2UZE | CRYSTAL STRUCTURE OF HUMAN CDK2 COMPLEXED WITH A THIAZOLIDINONE INHIBITOR                                                                             | TRANSFERASE                        |
| 2UZI | CRYSTAL STRUCTURE OF HRAS(G12V)- ANTI-RAS FV COMPLEX                                                                                                  | SIGNALING PROTEIN/IMMUNE SYSTEM    |
| 2UZL | CRYSTAL STRUCTURE OF HUMAN CDK2 COMPLEXED WITH A THIAZOLIDINONE INHIBITOR                                                                             | TRANSFERASE                        |
| 2UZT | PKA STRUCTURES OF AKT, INDAZOLE-PYRIDINE INHIBITORS                                                                                                   | TRANSFERASE                        |
| 2UZU | PKA STRUCTURES OF INDAZOLE-PYRIDINE SERIES OF AKT INHIBITORS                                                                                          | TRANSFERASE                        |
| 2UZW | PKA STRUCTURES OF INDAZOLE-PYRIDINE SERIES OF AKT INHIBITORS                                                                                          | TRANSFERASE                        |
| 2UZX | STRUCTURE OF THE HUMAN RECEPTOR TYROSINE KINASE MET IN COMPLEX WITH THE LISTERIA MONOCYTOGENES INVASION PROTEIN INLB: CRYSTAL FORM I                  | SIGNALING PROTEIN/RECEPTOR COMPLEX |
| 2UZY | STRUCTURE OF THE HUMAN RECEPTOR TYROSINE KINASE MET IN COMPLEX WITH THE LISTERIA MONOCYTOGENES INVASION PROTEIN INLB: LOW RESOLUTION, CRYSTAL FORM II | SIGNALING PROTEIN/RECEPTOR COMPLEX |
| 2V17 | STRUCTURE OF THE COMPLEX OF ANTIBODY MN423 WITH A FRAGMENT OF TAU PROTEIN                                                                             | IMMUNE SYSTEM                      |
| 2V1C | CRYSTAL STRUCTURE AND MUTATIONAL STUDY OF RECOR PROVIDE INSIGHT INTO ITS ROLE IN DNA REPAIR                                                           | RECOMBINATION                      |
| 2V1D | STRUCTURAL BASIS OF LSD1-COREST SELECTIVITY IN HISTONE H3 RECOGNITION                                                                                 | OXIDOREDUCTASE/REPRESSOR           |
| 2V1S | CRYSTAL STRUCTURE OF RAT TOM20-ALDH PRESEQUENCE COMPLEX                                                                                               | OXIDOREDUCTASE                     |
| 2V1T | CRYSTAL STRUCTURE OF RAT TOM20-ALDH PRESEQUENCE COMPLEX                                                                                               | OXIDOREDUCTASE                     |
| 2V1Y | STRUCTURE OF A PHOSPHOINOSITIDE 3-KINASE ALPHA ADAPTOR-BINDING DOMAIN (ABD) IN A COMPLEX WITH THE ISH2 DOMAIN FROM P85 ALPHA                          | TRANSFERASE                        |
| 2V22 | REPLACE: A STRATEGY FOR ITERATIVE DESIGN OF CYCLIN BINDING GROOVE INHIBITORS                                                                          | TRANSFERASE                        |
| 2V2W | T CELL CROSS-REACTIVITY AND CONFORMATIONAL CHANGES DURING TCR ENGAGEMENT                                                                              | IMMUNE SYSTEM                      |
| 2V2X | T CELL CROSS-REACTIVITY AND CONFORMATIONAL CHANGES DURING TCR ENGAGEMENT.                                                                             | IMMUNE SYSTEM                      |
| 2V36 | CRYSTAL STRUCTURE OF GAMMA-GLUTAMYL TRANSFERASE FROM BACILLUS SUBTILIS                                                                                | TRANSFERASE                        |
| 2V3B | CRYSTAL STRUCTURE OF THE ELECTRON TRANSFER COMPLEX RUBREDOXIN - RUBREDOXIN REDUCTASE FROM PSEUDOMONAS AERUGINOSA.                                     | OXIDOREDUCTASE                     |
| 2V3H | THROMBIN WITH 3-CYCLE NO F                                                                                                                            | BLOOD CLOTTING                     |
| 2V3O | THROMBIN WITH 3-CYCLE WITH F                                                                                                                          | BLOOD CLOTTING                     |
| 2V3S | STRUCTURAL INSIGHTS INTO THE RECOGNITION OF SUBSTRATES AND ACTIVATORS BY THE OSR1 KINASE                                                              | TRANSFERASE                        |
| 2V46 | STRUCTURE OF THE RIBOSOME RECYCLING FACTOR BOUND TO THE THERMUS THERMOPHILUS 70S RIBOSOME WITH MRNA, ASL-PHE AND                                      | RIBOSOME                           |

|      |                                                                                                                                                                                                                                     |                                        |
|------|-------------------------------------------------------------------------------------------------------------------------------------------------------------------------------------------------------------------------------------|----------------------------------------|
|      | TRNA-FMET (PART 1 OF 4). THIS FILE CONTAINS THE 30S SUBUNIT, MRNA, P-SITE ASL, E-SITE TRNA AND RRF FOR MOLECULE 1.                                                                                                                  | RIBOSOME                               |
| 2V47 | STRUCTURE OF THE RIBOSOME RECYCLING FACTOR BOUND TO THE THERMUS THERMOPHILUS 70S RIBOSOME WITH MRNA, ASL-PHE AND TRNA-FMET (PART 2 OF 4). THIS FILE CONTAINS THE 50S SUBUNIT FOR MOLECULE 1.                                        | RIBOSOME                               |
| 2V48 | STRUCTURE OF THE RIBOSOME RECYCLING FACTOR BOUND TO THE THERMUS THERMOPHILUS 70S RIBOSOME WITH MRNA, ASL-PHE AND TRNA-FMET (PART 3 OF 4). THIS FILE CONTAINS THE 30S SUBUNIT, MRNA, P-SITE ASL, E-SITE TRNA AND RRF FOR MOLECULE 2. | RIBOSOME                               |
| 2V49 | STRUCTURE OF THE RIBOSOME RECYCLING FACTOR BOUND TO THE THERMUS THERMOPHILUS 70S RIBOSOME WITH MRNA, ASL-PHE AND TRNA-FMET (PART 4 OF 4). THIS FILE CONTAINS THE 50S SUBUNIT OF MOLECULE 2.                                         | RIBOSOME                               |
| 2V4I | STRUCTURE OF A NOVEL N-ACYL-ENZYME INTERMEDIATE OF AN N-TERMINAL NUCLEOPHILE (NTN) HYDROLASE, OAT2                                                                                                                                  | TRANSFERASE                            |
| 2V4J | THE CRYSTAL STRUCTURE OF DESULFOVIBRIO VULGARIS DISSIMILATORY SULFITE REDUCTASE BOUND TO DSRC PROVIDES NOVEL INSIGHTS INTO THE MECHANISM OF SULFATE RESPIRATION                                                                     | OXIDOREDUCTASE                         |
| 2V4Z | THE CRYSTAL STRUCTURE OF THE HUMAN G-PROTEIN SUBUNIT ALPHA (GNAI3) IN COMPLEX WITH AN ENGINEERED REGULATOR OF G-PROTEIN SIGNALING TYPE 2 DOMAIN (RGS2)                                                                              | CELL CYCLE                             |
| 2V51 | STRUCTURE OF MAL-RPEL1 COMPLEXED TO ACTIN                                                                                                                                                                                           | STRUCTURAL PROTEIN/CONTRACTILE PROTEIN |
| 2V52 | STRUCTURE OF MAL-RPEL2 COMPLEXED TO G-ACTIN                                                                                                                                                                                         | STRUCTURAL PROTEIN/CONTRACTILE PROTEIN |
| 2V53 | CRYSTAL STRUCTURE OF A SPARC-COLLAGEN COMPLEX                                                                                                                                                                                       | CELL ADHESION                          |
| 2V55 | MECHANISM OF MULTI-SITE PHOSPHORYLATION FROM A ROCK-I:RHOE COMPLEX STRUCTURE                                                                                                                                                        | TRANSFERASE                            |
| 2V5E | THE STRUCTURE OF THE GDNF\CORECEPTOR COMPLEX\; INSIGHTS INTO RET SIGNALLING AND HEPARIN BINDING.                                                                                                                                    | RECEPTOR/GLYCOPROTEIN COMPLEX          |
| 2V5H | CONTROLLING THE STORAGE OF NITROGEN AS ARGININE: THE COMPLEX OF PII AND ACETYLGLUTAMATE KINASE FROM SYNECHOCOCCUS ELONGATUS PCC 7942                                                                                                | TRANSCRIPTION                          |
| 2V5P | COMPLEX STRUCTURE OF HUMAN IGF2R DOMAINS 11-13 BOUND TO IGF-II                                                                                                                                                                      | RECEPTOR/GLYCOPROTEIN COMPLEX          |
| 2V5Q | CRYSTAL STRUCTURE OF WILD-TYPE PLK-1 KINASE DOMAIN IN COMPLEX WITH A SELECTIVE DARPIN                                                                                                                                               | TRANSFERASE COMPLEX                    |
| 2V5W | CRYSTAL STRUCTURE OF HDAC8-SUBSTRATE COMPLEX                                                                                                                                                                                        | HYDROLASE                              |
| 2V63 | CRYSTAL STRUCTURE OF RUBISCO FROM CHLAMYDOMONAS REINHARDTII WITH A LARGE-SUBUNIT V331A MUTATION                                                                                                                                     | OXIDOREDUCTASE                         |
| 2V64 | CRYSTALLOGRAPHIC STRUCTURE OF THE CONFORMATIONAL DIMER OF THE SPINDLE ASSEMBLY CHECKPOINT PROTEIN MAD2.                                                                                                                             | CELL CYCLE                             |
| 2V67 | CRYSTAL STRUCTURE OF CHLAMYDOMONAS REINHARDTII RUBISCO WITH A LARGE-SUBUNIT SUPPRESSOR MUTATION T342I                                                                                                                               | OXIDOREDUCTASE                         |
| 2V68 | CRYSTAL STRUCTURE OF CHLAMYDOMONAS REINHARDTII RUBISCO WITH                                                                                                                                                                         | OXIDOREDUCTASE                         |

|      | LARGE-SUBUNIT MUTATIONS V331A, T342I                                                              |                    |
|------|---------------------------------------------------------------------------------------------------|--------------------|
|      |                                                                                                   | OXIDOREDUCTASE     |
| 2V69 | CRYSTAL STRUCTURE OF CHLAMYDOMONAS REINHARDTII RUBISCO WITH A LARGE-SUBUNIT MUTATION D473E        | OXIDOREDUCTASE     |
| 2V6A | CRYSTAL STRUCTURE OF CHLAMYDOMONAS REINHARDTII RUBISCO WITH LARGE-SUBUNIT MUTATIONS V331A, G344S  | APOPTOSIS          |
| 2V6Q | CRYSTAL STRUCTURE OF A BHRF-1 : BIM BH3 COMPLEX                                                   | PROTEIN TRANSPORT  |
| 2V6X | STRUCTURAL INSIGHT INTO THE INTERACTION BETWEEN ESCRT-III AND VPS4                                | SIGNALING PROTEIN  |
| 2V7D | 14-3-3 PROTEIN ZETA IN COMPLEX WITH THR758 PHOSPHORYLATED INTEGRIN BETA2 PEPTIDE                  | IMMUNE SYSTEM      |
| 2V7H | CRYSTAL STRUCTURE OF AN IMMUNOGEN SPECIFIC ANTI-MANNOPYRANOSIDE MONOCLONAL ANTIBODY FAB FRAGMENT  | IMMUNE SYSTEM      |
| 2V7N | UNUSUAL TWINNING IN CRYSTALS OF THE CITS BINDING ANTIBODY FAB FRAGMENT F3P4                       | HYDROLASE          |
| 2V7Q | THE STRUCTURE OF F1-ATPASE INHIBITED BY I1-60HIS, A MONOMERIC FORM OF THE INHIBITOR PROTEIN, IF1. | PROTEIN BINDING    |
| 2V83 | CRYSTAL STRUCTURE OF RAG2-PHD FINGER IN COMPLEX WITH H3K4ME3 PEPTIDE                              | PROTEIN BINDING    |
| 2V85 | CRYSTAL STRUCTURE OF RAG2-PHD FINGER IN COMPLEX WITH H3R2ME1K4ME3 PEPTIDE                         | PROTEIN BINDING    |
| 2V86 | CRYSTAL STRUCTURE OF RAG2-PHD FINGER IN COMPLEX WITH H3R2ME2AK4ME3 PEPTIDE                        | PROTEIN BINDING    |
| 2V87 | CRYSTAL STRUCTURE OF RAG2-PHD FINGER IN COMPLEX WITH H3R2ME2SK4ME3 PEPTIDE                        | PROTEIN BINDING    |
| 2V88 | CRYSTAL STRUCTURE OF RAG2-PHD FINGER IN COMPLEX WITH H3R2ME2SK4ME2 PEPTIDE                        | PROTEIN BINDING    |
| 2V89 | CRYSTAL STRUCTURE OF RAG2-PHD FINGER IN COMPLEX WITH H3K4ME3 PEPTIDE AT 1.1A RESOLUTION           | ELECTRON TRANSPORT |
| 2V8A | THE STRUCTURE OF THERMOSYNECHOCOCCUS ELONGATUS ALLOPHYCOCYANIN AT 3.5 ANGSTROEMS.                 | PROTEIN-BINDING    |
| 2V8C | MOUSE PROFILIN IIA IN COMPLEX WITH THE PROLINE-RICH DOMAIN OF VASP                                | PROTEIN-BINDING    |
| 2V8F | MOUSE PROFILIN IIA IN COMPLEX WITH A DOUBLE REPEAT FROM THE FH1 DOMAIN OF MDIA1                   | TRANSFERASE        |
| 2V8Q | CRYSTAL STRUCTURE OF THE REGULATORY FRAGMENT OF MAMMALIAN AMPK IN COMPLEXES WITH AMP              | PROTEIN TRANSPORT  |
| 2V8S | VTI1B HABC DOMAIN - EPSINR ENTH DOMAIN COMPLEX                                                    | TRANSLATION        |
| 2V8W | CRYSTALLOGRAPHIC AND MASS SPECTROMETRIC CHARACTERISATION OF EIF4E WITH N7-CAP DERIVATIVES         | TRANSLATION        |
| 2V8X | CRYSTALLOGRAPHIC AND MASS SPECTROMETRIC CHARACTERISATION OF EIF4E WITH N7-CAP DERIVATIVES         | TRANSLATION        |
| 2V8Y | CRYSTALLOGRAPHIC AND MASS SPECTROMETRIC CHARACTERISATION OF EIF4E WITH N7-CAP DERIVATIVES         |                    |

|      |                                                                                                                                                           |                                     |
|------|-----------------------------------------------------------------------------------------------------------------------------------------------------------|-------------------------------------|
| 2V92 | CRYSTAL STRUCTURE OF THE REGULATORY FRAGMENT OF MAMMALIAN AMPK IN COMPLEXES WITH ATP-AMP                                                                  | TRANSFERASE                         |
| 2V9J | CRYSTAL STRUCTURE OF THE REGULATORY FRAGMENT OF MAMMALIAN AMPK IN COMPLEXES WITH MG.ATP-AMP                                                               | TRANSFERASE                         |
| 2VAA | MHC CLASS I H-2KB HEAVY CHAIN COMPLEXED WITH BETA-2 MICROGLOBULIN AND VESICULAR STOMATITIS VIRUS NUCLEOPROTEIN                                            | COMPLEX (MHC I/PEPTIDE)             |
| 2VAB | MHC CLASS I H-2KB HEAVY CHAIN COMPLEXED WITH BETA-2 MICROGLOBULIN AND SENDAI VIRUS NUCLEOPROTEIN                                                          | COMPLEX (MHC I/PEPTIDE)             |
| 2VAS | MYOSIN VI (MD-INSERT2-CAM, DELTA-INSERT1) POST-RIGOR STATE                                                                                                | MOTOR PROTEIN                       |
| 2VAY | CALMODULIN COMPLEXED WITH CAV1.1 IQ PEPTIDE                                                                                                               | METAL TRANSPORT                     |
| 2VB6 | MYOSIN VI (MD-INSERT2-CAM, DELTA INSERT1) POST-RIGOR STATE ( CRYSTAL FORM 2)                                                                              | MOTOR PROTEIN                       |
| 2VB7 | BETA-KETOACYL-ACP SYNTHASE I (KAS) FROM E. COLI, APO STRUCTURE AFTER SOAK IN PEG SOLUTION                                                                 | TRANSFERASE                         |
| 2VBC | CRYSTAL STRUCTURE OF THE NS3 PROTEASE-HELICASE FROM DENGUE VIRUS                                                                                          | HYDROLASE                           |
| 2VBJ | MOLECULAR BASIS OF HUMAN XPC GENE RECOGNITION AND CLEAVAGE BY ENGINEERED HOMING ENDONUCLEASE HETERODIMERS                                                 | HYDROLASE                           |
| 2VBL | MOLECULAR BASIS OF HUMAN XPC GENE RECOGNITION AND CLEAVAGE BY ENGINEERED HOMING ENDONUCLEASE HETERODIMERS                                                 | HYDROLASE                           |
| 2VBN | MOLECULAR BASIS OF HUMAN XPC GENE RECOGNITION AND CLEAVAGE BY ENGINEERED HOMING ENDONUCLEASE HETERODIMERS                                                 | HYDROLASE                           |
| 2VBO | MOLECULAR BASIS OF HUMAN XPC GENE RECOGNITION AND CLEAVAGE BY ENGINEERED HOMING ENDONUCLEASE HETERODIMERS                                                 | HYDROLASE                           |
| 2VC2 | RE-REFINEMENT OF INTEGRIN ALPHAIIIBETA3 HEADPIECE BOUND TO ANTAGONIST L-739758                                                                            | CELL ADHESION/IMMUNE SYSTEM COMPLEX |
| 2VCP | CRYSTAL STRUCTURE OF N-WASP VC DOMAIN IN COMPLEX WITH SKELETAL ACTIN                                                                                      | STRUCTURAL PROTEIN                  |
| 2VDB | STRUCTURE OF HUMAN SERUM ALBUMIN WITH S-NAPROXEN AND THE GA MODULE                                                                                        | PROTEIN BINDING                     |
| 2VDC | THE 9.5 Å RESOLUTION STRUCTURE OF GLUTAMATE SYNTHASE FROM CRYO-ELECTRON MICROSCOPY AND ITS OLIGOMERIZATION BEHAVIOR IN SOLUTION: FUNCTIONAL IMPLICATIONS. | OXIDOREDUCTASE                      |
| 2VDH | CRYSTAL STRUCTURE OF CHLAMYDOMONAS REINHARDTII RUBISCO WITH A LARGE-SUBUNIT C172S MUTATION                                                                | LYASE                               |
| 2VDI | CRYSTAL STRUCTURE OF CHLAMYDOMONAS REINHARDTII RUBISCO WITH A LARGE-SUBUNIT C192S MUTATION                                                                | LYASE                               |
| 2VDK | RE-REFINEMENT OF INTEGRIN ALPHAIIIBETA3 HEADPIECE                                                                                                         | CELL ADHESION/IMMUNE SYSTEM COMPLEX |
| 2VDL | RE-REFINEMENT OF INTEGRIN ALPHAIIIBETA3 HEADPIECE                                                                                                         | CELL ADHESION/IMMUNE SYSTEM COMPLEX |
| 2VDM | RE-REFINEMENT OF INTEGRIN ALPHAIIIBETA3 HEADPIECE BOUND TO ANTAGONIST TIROFIBAN                                                                           | CELL ADHESION/IMMUNE SYSTEM COMPLEX |
| 2VDN | RE-REFINEMENT OF INTEGRIN ALPHAIIIBETA3 HEADPIECE BOUND TO                                                                                                | CELL ADHESION/IMMUNE SYSTEM COMPLEX |



| ANTAGONIST EPTIFIBATIDE |                                                                                                                               |                                     |
|-------------------------|-------------------------------------------------------------------------------------------------------------------------------|-------------------------------------|
| 2VDO                    | INTEGRIN ALPHAIIIBBETA3 HEADPIECE BOUND TO FIBRINOGEN GAMMA CHAIN PEPTIDE, HHLGGAKQAGDV                                       | CELL ADHESION/IMMUNE SYSTEM COMPLEX |
| 2VDP                    | INTEGRIN ALPHAIIIBBETA3 HEADPIECE BOUND TO FIBRINOGEN GAMMA CHAIN PEPTIDE,LGGAKQAGDV                                          | CELL ADHESION/IMMUNE SYSTEM COMPLEX |
| 2VDQ                    | INTEGRIN ALPHAIIIBBETA3 HEADPIECE BOUND TO A CHIMERIC FIBRINOGEN GAMMA CHAIN PEPTIDE, HHLGGAKQRGDV                            | CELL ADHESION/IMMUNE SYSTEM COMPLEX |
| 2VDR                    | INTEGRIN ALPHAIIIBBETA3 HEADPIECE BOUND TO A CHIMERIC FIBRINOGEN GAMMA CHAIN PEPTIDE, LGGAKQRGDV                              | CELL ADHESION/IMMUNE SYSTEM COMPLEX |
| 2VDU                    | STRUCTURE OF TRM8-TRM82, THE YEAST TRNA M7G METHYLATION COMPLEX                                                               | TRANSFERASE                         |
| 2VDW                    | GUANOSINE N7 METHYL-TRANSFERASE SUB-COMPLEX (D1-D12) OF THE VACCINIA VIRUS MRNA CAPPING ENZYME                                | TRANSFERASE                         |
| 2VE5                    | CRYSTALLOGRAPHIC STRUCTURE OF BETAINE ALDEHYDE DEHYDROGENASE FROM PSEUDOMONAS AERUGINOSA                                      | OXIDOREDUCTASE                      |
| 2VE6                    | CRYSTAL STRUCTURE OF A MURINE MHC CLASS I H2-DB MOLECULE IN COMPLEX WITH A PHOTOCLEAVABLE PEPTIDE                             | IMMUNE SYSTEM                       |
| 2VE7                    | CRYSTAL STRUCTURE OF A BONSAI VERSION OF THE HUMAN NDC80 COMPLEX                                                              | CELL CYCLE                          |
| 2VG5                    | CRYSTAL STRUCTURES OF HIV-1 REVERSE TRANSCRIPTASE COMPLEXES WITH THIOCARBAMATE NON-NUCLEOSIDE INHIBITORS                      | TRANSFERASE                         |
| 2VG6                    | CRYSTAL STRUCTURES OF HIV-1 REVERSE TRANSCRIPTASE COMPLEXES WITH THIOCARBAMATE NON-NUCLEOSIDE INHIBITORS                      | TRANSFERASE                         |
| 2VG7                    | CRYSTAL STRUCTURES OF HIV-1 REVERSE TRANSCRIPTASE COMPLEXES WITH THIOCARBAMATE NON-NUCLEOSIDE INHIBITORS                      | TRANSFERASE                         |
| 2VGC                    | GAMMA-CHYMOTRYPSIN D-PARA-CHLORO-1-ACETAMIDO BORONIC ACID INHIBITOR COMPLEX                                                   | SERINE PROTEASE                     |
| 2VGL                    | AP2 CLATHRIN ADAPTOR CORE                                                                                                     | PROTEIN TRANSPORT                   |
| 2VGO                    | CRYSTAL STRUCTURE OF AURORA B KINASE IN COMPLEX WITH REVERSINE INHIBITOR                                                      | TRANSFERASE                         |
| 2VGP                    | CRYSTAL STRUCTURE OF AURORA B KINASE IN COMPLEX WITH A AMINOTHIAZOLE INHIBITOR                                                | TRANSFERASE                         |
| 2VGX                    | STRUCTURE OF THE YERSINIA ENTEROCOLITICA TYPE III SECRETION TRANSLOCATOR CHAPERONE SYCD                                       | CHAPERONE                           |
| 2VH0                    | STRUCTURE AND PROPERTY BASED DESIGN OF FACTOR XA INHIBITORS: BIARYL PYRROLIDIN-2-ONES INCORPORATING BASIC HETEROCYCLIC MOTIFS | HYDROLASE                           |
| 2VH3                    | RANASMURFIN                                                                                                                   | UNKNOWN FUNCTION                    |
| 2VH5                    | CRYSTAL STRUCTURE OF HRAS(G12V) - ANTI-RAS FV (DISULFIDE FREE MUTANT) COMPLEX                                                 | IMMUNE SYSTEM                       |
| 2VH8                    | CRYSTAL STRUCTURE OF SYNAPTIC PROTEIN NEUROLIGIN 4 IN COMPLEX WITH NEUREXIN BETA 1.                                           | CELL ADHESION                       |
| 2VHM                    | STRUCTURE OF PDF BINDING HELIX IN COMPLEX WITH THE RIBOSOME                                                                   | RIBOSOME                            |

|      | (PART 1 OF 4)                                                                                                                                                                                |                                        |
|------|----------------------------------------------------------------------------------------------------------------------------------------------------------------------------------------------|----------------------------------------|
| 2VHN | STRUCTURE OF PDF BINDING HELIX IN COMPLEX WITH THE RIBOSOME.<br>(PART 2 OF 4)                                                                                                                | RIBOSOME                               |
| 2VH0 | STRUCTURE AND PROPERTY BASED DESIGN OF FACTOR XA<br>INHIBITORS: BIARYL PYRROLIDIN-2-ONES INCORPORATING BASIC<br>HETEROCYCLIC MOTIFS                                                          | HYDROLASE                              |
| 2VHO | STRUCTURE OF PDF BINDING HELIX IN COMPLEX WITH THE RIBOSOME<br>(PART 3 OF 4)                                                                                                                 | RIBOSOME                               |
| 2VHP | STRUCTURE OF PDF BINDING HELIX IN COMPLEX WITH THE RIBOSOME<br>(PART 4 OF 4)                                                                                                                 | RIBOSOME                               |
| 2VIF | CRYSTAL STRUCTURE OF SOCS6 SH2 DOMAIN IN COMPLEX WITH A C-<br>KIT PHOSHOPEPTIDE                                                                                                              | SIGNALING PROTEIN                      |
| 2VIR | INFLUENZA VIRUS HEMAGGLUTININ COMPLEXED WITH A NEUTRALIZING<br>ANTIBODY                                                                                                                      | COMPLEX (HEMAGGLUTININ/IMMUNOGLOBULIN) |
| 2VIS | INFLUENZA VIRUS HEMAGGLUTININ, (ESCAPE) MUTANT WITH THR 131<br>REPLACED BY ILE, COMPLEXED WITH A NEUTRALIZING ANTIBODY                                                                       | COMPLEX (HEMAGGLUTININ/IMMUNOGLOBULIN) |
| 2VIT | INFLUENZA VIRUS HEMAGGLUTININ, MUTANT WITH THR 155 REPLACED<br>BY ILE, COMPLEXED WITH A NEUTRALIZING ANTIBODY                                                                                | COMPLEX (HEMAGGLUTININ/IMMUNOGLOBULIN) |
| 2VIU | INFLUENZA VIRUS HEMAGGLUTININ                                                                                                                                                                | HEMAGGLUTININ                          |
| 2VJ0 | CRYSTAL STRUCTURE OF THE ALPHA-ADAPTIN APPENDAGE DOMAIN,<br>FROM THE AP2 ADAPTOR COMPLEX, IN COMPLEX WITH AN FXDNF<br>PEPTIDE FROM AMPHIPHYSIN1 AND A WVXF PEPTIDE FROM<br>SYNAPTOJANIN P170 | PROTEIN TRANSPORT                      |
| 2VJE | CRYSTAL STRUCTURE OF THE MDM2-MDMX RING DOMAIN HETERODIMER                                                                                                                                   | LIGASE                                 |
| 2VJF | CRYSTAL STRUCTURE OF THE MDM2-MDMX RING DOMAIN HETERODIMER                                                                                                                                   | LIGASE                                 |
| 2VJH | THE STRUCTURE OF PHYCOERYTHRIN FROM GLOEOBACTER VIOLACEUS                                                                                                                                    | PHOTOSYNTHESIS                         |
| 2VJM | FORMYL-COA TRANSFERASE WITH ASPARTYL-FORMYL ANHYDIDE<br>INTERMEDIATE                                                                                                                         | TRANSFERASE                            |
| 2VJR | THE STRUCTURE OF PHYCOCYANIN FROM GLOEOBACTER VIOLACEUS                                                                                                                                      | PHOTOSYNTHESIS                         |
| 2VJT | THE STRUCTURE OF ALLOPHYCOCYANIN FROM GLOEOBACTER VIOLACEUS                                                                                                                                  | PHOTOSYNTHESIS                         |
| 2VJZ | CRYSTAL STRUCTURE FORM ULTALENTE INSULIN MICROCRYSTALS                                                                                                                                       | HORMONE                                |
| 2VK0 | CRYSTAL STRUCTURE FORM ULTALENTE INSULIN MICROCRYSTALS                                                                                                                                       | HORMONE                                |
| 2VL2 | OXIDIZED AND REDUCED FORMS OF HUMAN PEROXIREDOXIN 5                                                                                                                                          | OXIDOREDUCTASE                         |
| 2VL5 | STRUCTURE OF ANTI-COLLAGEN TYPE II FAB CIIC1                                                                                                                                                 | IMMUNE SYSTEM                          |
| 2VLH | QUINONOID INTERMEDIATE OF CITROBACTER FREUNDII TYROSINE<br>PHENOL-LYASE FORMED WITH METHIONINE                                                                                               | LYASE                                  |
| 2VLJ | THE STRUCTURAL DYNAMICS AND ENERGETICS OF AN IMMUNODOMINANT<br>T-CELL RECEPTOR ARE PROGRAMMED BY ITS VBETA DOMAIN                                                                            | IMMUNE SYSTEM                          |
| 2VLK | THE STRUCTURAL DYNAMICS AND ENERGETICS OF AN IMMUNODOMINANT<br>T-CELL RECEPTOR ARE PROGRAMMED BY ITS VBETA DOMAIN                                                                            | IMMUNE SYSTEM                          |
| 2VLL | THE STRUCTURAL DYNAMICS AND ENERGETICS OF AN IMMUNODOMINANT                                                                                                                                  | IMMUNE SYSTEM                          |

|      |                                                                                                                                 |                 |
|------|---------------------------------------------------------------------------------------------------------------------------------|-----------------|
|      | T-CELL RECEPTOR ARE PROGRAMMED BY ITS VBETA DOMAIN                                                                              | IMMUNE SYSTEM   |
| 2VLM | THE STRUCTURAL DYNAMICS AND ENERGETICS OF AN IMMUNODOMINANT T-CELL RECEPTOR ARE PROGRAMMED BY ITS VBETA DOMAIN                  |                 |
| 2VLN | N75A MUTANT OF E9 DNASE DOMAIN IN COMPLEX WITH IM9                                                                              | PROTEIN-BINDING |
| 2VLO | K97A MUTANT OF E9 DNASE DOMAIN IN COMPLEX WITH IM9                                                                              | PROTEIN-BINDING |
| 2VLP | R54A MUTANT OF E9 DNASE DOMAIN IN COMPLEX WITH IM9                                                                              | PROTEIN-BINDING |
| 2VLQ | F86A MUTANT OF E9 DNASE DOMAIN IN COMPLEX WITH IM9                                                                              | PROTEIN-BINDING |
| 2VLR | THE STRUCTURAL DYNAMICS AND ENERGETICS OF AN IMMUNODOMINANT T-CELL RECEPTOR ARE PROGRAMMED BY ITS VBETA DOMAIN                  | IMMUNE SYSTEM   |
| 2VM6 | HUMAN BCL2-A1 IN COMPLEX WITH BIM-BH3 PEPTIDE                                                                                   | IMMUNE SYSTEM   |
| 2VML | THE MONOCLINIC STRUCTURE OF PHYCOCYANIN FROM GLOEOBACTER VIOLACEUS                                                              | PHOTOSYNTHESIS  |
| 2VN5 | THE CLOSTRIDIUM CELLULOLYTICUM DOCKERIN DISPLAYS A DUAL BINDING MODE FOR ITS COHESIN PARTNER                                    | CELL ADHESION   |
| 2VN6 | THE CLOSTRIDIUM CELLULOLYTICUM DOCKERIN DISPLAYS A DUAL BINDING MODE FOR ITS COHESIN PARTNER                                    | CELL ADHESION   |
| 2VNW | STRUCTURE OF PKA-PKB CHIMERA COMPLEXED WITH (1-(9H-PURIN-6-YL)PIPERIDIN-4-YL)METHANAMINE                                        | TRANSFERASE     |
| 2VNY | STRUCTURE OF PKA-PKB CHIMERA COMPLEXED WITH (1-(9H-PURIN-6-YL)PIPERIDIN-4-YL)AMINE                                              | TRANSFERASE     |
| 2VO0 | STRUCTURE OF PKA-PKB CHIMERA COMPLEXED WITH C-(4-(4-CHLOROPHENYL)-1-(7H-PYRROLO(2,3-D)PYRIMIDIN-4-YL)PIPERIDIN-4-YL)METHYLAMINE | TRANSFERASE     |
| 2VO3 | STRUCTURE OF PKA-PKB CHIMERA COMPLEXED WITH C-(4-(4-CHLOROPHENYL)-1-(7H-PYRROLO(2,3-D)PYRIMIDIN-4-YL)PIPERIDIN-4-YL)METHYLAMINE | TRANSFERASE     |
| 2VO6 | STRUCTURE OF PKA-PKB CHIMERA COMPLEXED WITH 4-(4-CHLOROBENZYL)-1-(7H-PYRROLO(2,3-D)PYRIMIDIN-4-YL)PIPERIDIN-4-YLAMINE           | TRANSFERASE     |
| 2VO7 | STRUCTURE OF PKA COMPLEXED WITH 4-(4-CHLOROBENZYL)-1-(7H-PYRROLO(2,3-D)PYRIMIDIN-4-YL)PIPERIDIN-4-YLAMINE                       | TRANSFERASE     |
| 2VOF | STRUCTURE OF MOUSE A1 BOUND TO THE PUMA BH3-DOMAIN                                                                              | APOPTOSIS       |
| 2VOG | STRUCTURE OF MOUSE A1 BOUND TO THE BMF BH3-DOMAIN                                                                               | APOPTOSIS       |
| 2VOH | STRUCTURE OF MOUSE A1 BOUND TO THE BAK BH3-DOMAIN                                                                               | APOPTOSIS       |
| 2VOI | STRUCTURE OF MOUSE A1 BOUND TO THE BID BH3-DOMAIN                                                                               | APOPTOSIS       |
| 2VOL | MURINE TRIM21 IN COMPLEX WITH MURINE IGG FC                                                                                     | IMMUNE SYSTEM   |
| 2VP7 | DECODING OF METHYLATED HISTONE H3 TAIL BY THE PYGO-BCL9 WNT SIGNALING COMPLEX                                                   | GENE REGULATION |
| 2VPB | DECODING OF METHYLATED HISTONE H3 TAIL BY THE PYGO-BCL9 WNT SIGNALING COMPLEX                                                   | GENE REGULATION |
| 2VPD | DECODING OF METHYLATED HISTONE H3 TAIL BY THE PYGO-BCL9 WNT                                                                     | GENE REGULATION |

| SIGNALING COMPLEX |                                                                                                                                                              |                        |
|-------------------|--------------------------------------------------------------------------------------------------------------------------------------------------------------|------------------------|
| 2VPE              | DECODING OF METHYLATED HISTONE H3 TAIL BY THE PYGO-BCL9 WNT SIGNALING COMPLEX                                                                                | GENE REGULATION        |
| 2VPG              | DECODING OF METHYLATED HISTONE H3 TAIL BY THE PYGO-BCL9 WNT SIGNALING COMPLEX                                                                                | GENE REGULATION        |
| 2VQ6              | TORPEDO CALIFORNICA ACETYLCHOLINESTERASE COMPLEXED WITH 2-PAM                                                                                                | HYDROLASE              |
| 2VQE              | MODIFIED URIDINES WITH C5-METHYLENE SUBSTITUENTS AT THE FIRST POSITION OF THE TRNA ANTICODON STABILIZE U-G WOBBLE PAIRING DURING DECODING                    | RIBOSOME               |
| 2VQF              | MODIFIED URIDINES WITH C5-METHYLENE SUBSTITUENTS AT THE FIRST POSITION OF THE TRNA ANTICODON STABILIZE U-G WOBBLE PAIRING DURING DECODING                    | RIBOSOME               |
| 2VR0              | CRYSTAL STRUCTURE OF CYTOCHROME C NITRITE REDUCTASE NRFHA COMPLEX BOUND TO THE HQNO INHIBITOR                                                                | OXIDOREDUCTASE         |
| 2VRC              | CRYSTAL STRUCTURE OF THE CITROBACTER SP. TRIPHENYLMETHANE REDUCTASE COMPLEXED WITH NADP(H)                                                                   | OXIDOREDUCTASE         |
| 2VRP              | STRUCTURE OF RHODOCYTIN                                                                                                                                      | SUGAR-BINDING PROTEIN  |
| 2VRR              | STRUCTURE OF SUMO MODIFIED UBC9                                                                                                                              | CELL CYCLE/LIGASE      |
| 2VRW              | CRITICAL STRUCTURAL ROLE FOR THE PH AND C1 DOMAINS OF THE VAV1 EXCHANGE FACTOR                                                                               | SIGNALING PROTEIN      |
| 2VRX              | STRUCTURE OF AURORA B KINASE IN COMPLEX WITH ZM447439                                                                                                        | CELL CYCLE/TRANSFERASE |
| 2VSK              | HENDRA VIRUS ATTACHMENT GLYCOPROTEIN IN COMPLEX WITH HUMAN CELL SURFACE RECEPTOR EPHRINB2                                                                    | HYDROLASE              |
| 2VSL              | CRYSTAL STRUCTURE OF XIAP BIR3 WITH A BIVALENT SMAC MIMETIC                                                                                                  | LIGASE                 |
| 2VSO              | CRYSTAL STRUCTURE OF A TRANSLATION INITIATION COMPLEX                                                                                                        | HYDROLASE/TRANSLATION  |
| 2VSS              | WILD-TYPE HYDROXYCINNA MOYL-COA HYDRATASE LYASE IN COMPLEX WITH ACETYL-COA AND VANILLIN                                                                      | LYASE                  |
| 2VSU              | TERNARY COMPLEX OF HYDROXYCINNA MOYL-COA HYDRATASE-LYASE (HCHL) WITH ACETYL-COENZYME A AND VANILLIN GIVES INSIGHTS INTO SUBSTRATE SPECIFICITY AND MECHANISM. | LYASE                  |
| 2VSX              | CRYSTAL STRUCTURE OF A TRANSLATION INITIATION COMPLEX                                                                                                        | TRANSLATION/HYDROLASE  |
| 2VT1              | CRYSTAL STRUCTURE OF THE CYTOPLASMIC DOMAIN OF SPA40, THE SPECIFICITY SWITCH FOR THE SHIGELLA FLEXNERI TYPE III SECRETION SYSTEM                             | MEMBRANE PROTEIN       |
| 2VUM              | ALPHA-AMANITIN INHIBITED COMPLETE RNA POLYMERASE II ELONGATION COMPLEX                                                                                       | TRANSFERASE            |
| 2VUS              | CRYSTAL STRUCTURE OF UNLIGANDED NMRA-AREA ZINC FINGER COMPLEX                                                                                                | TRANSCRIPTION          |
| 2VUT              | CRYSTAL STRUCTURE OF NAD-BOUND NMRA-AREA ZINC FINGER COMPLEX                                                                                                 | TRANSCRIPTION          |
| 2VUU              | CRYSTAL STRUCTURE OF NADP-BOUND NMRA-AREA ZINC FINGER COMPLEX                                                                                                | TRANSCRIPTION          |

|      |                                                                                                                            |                                   |
|------|----------------------------------------------------------------------------------------------------------------------------|-----------------------------------|
| 2VV1 | HPPARGAMMA LIGAND BINDING DOMAIN IN COMPLEX WITH 4-HDHA                                                                    | RECEPTOR                          |
| 2VV4 | HPPARGAMMA LIGAND BINDING DOMAIN IN COMPLEX WITH 6-OXOOTE                                                                  | RECEPTOR                          |
| 2VVL | THE STRUCTURE OF MAO-N-D3, A VARIANT OF MONOAMINE OXIDASE FROM ASPERGILLUS NIGER.                                          | OXIDOREDUCTASE                    |
| 2VWE | CRYSTAL STRUCTURE OF VASCULAR ENDOTHELIAL GROWTH FACTOR-B IN COMPLEX WITH A NEUTRALIZING ANTIBODY FAB FRAGMENT             | IMMUNE SYSTEM                     |
| 2VXC | STRUCTURE OF THE CRB2-BRCT2 DOMAIN COMPLEX WITH PHOSPHOPEPTIDE.                                                            | CELL CYCLE                        |
| 2VYN | STRUCTURE OF E.COLI GAPDH RAT SPERM GAPDH HETEROTETRAMER                                                                   | OXIDOREDUCTASE                    |
| 2VYR | STRUCTURE OF HUMAN MDM4 N-TERMINAL DOMAIN BOUND TO A SINGLE DOMAIN ANTIBODY                                                | IMMUNE SYSTEM                     |
| 2VYV | STRUCTURE OF E.COLI GAPDH RAT SPERM GAPDH HETEROTETRAMER                                                                   | OXIDOREDUCTASE                    |
| 2VZD | CRYSTAL STRUCTURE OF THE C-TERMINAL CALPONIN HOMOLOGY DOMAIN OF ALPHA PARVIN IN COMPLEX WITH PAXILLIN LD1 MOTIF            | CELL ADHESION                     |
| 2VZG | CRYSTAL STRUCTURE OF THE C-TERMINAL CALPONIN HOMOLOGY DOMAIN OF ALPHA-PARVIN IN COMPLEX WITH PAXILLIN LD2 MOTIF            | CELL ADHESION                     |
| 2VZI | CRYSTAL STRUCTURE OF THE C-TERMINAL CALPONIN HOMOLOGY DOMAIN OF ALPHA-PARVIN IN COMPLEX WITH PAXILLIN LD4 MOTIF            | CELL ADHESION                     |
| 2VZK | STRUCTURE OF THE ACYL-ENZYME COMPLEX OF AN N-TERMINAL NUCLEOPHILE (NTN) HYDROLASE, OAT2                                    | TRANSFERASE                       |
| 2YRS | HUMAN HEMOGLOBIN D LOS ANGELES: CRYSTAL STRUCTURE                                                                          | TRANSPORT PROTEIN, OXYGEN BINDING |
| 2YSS | CRYSTAL STRUCTURE OF HUMANIZED HYHEL-10 FV MUTANT(HQ39KW47Y)-HEN LYSOZYME COMPLEX                                          | IMMUNE SYSTEM/HYDROLASE           |
| 2YSU | STRUCTURE OF THE COMPLEX BETWEEN BTUB AND COLICIN E2 RECEPTOR BINDING DOMAIN                                               | TRANSPORT PROTEIN/HYDROLASE       |
| 2YU9 | RNA POLYMERASE II ELONGATION COMPLEX IN 150 MM MG+2 WITH UTP                                                               | TRANSCRIPTION/DNA/RNA             |
| 2YVC | CRYSTAL STRUCTURE OF THE RADIXIN FERM DOMAIN COMPLEXED WITH THE NEP CYTOPLASMIC TAIL                                       | CELL ADHESION                     |
| 2YVJ | CRYSTAL STRUCTURE OF THE FERREDOXIN-FERREDOXIN REDUCTASE (BPHA3-BPHA4)COMPLEX                                              | OXIDOREDUCTASE/ELECTRON TRANSPORT |
| 2YXQ | THE PLUG DOMAIN OF THE SECY PROTEIN STABILIZES THE CLOSED STATE OF THE TRANSLOCATION CHANNEL AND MAINTAINS A MEMBRANE SEAL | PROTEIN TRANSPORT                 |
| 2YXR | THE PLUG DOMAIN OF THE SECY PROTEIN STABILIZES THE CLOSED STATE OF THE TRANSLOCATION CHANNEL AND MAINTAINS A MEMBRANE SEAL | PROTEIN TRANSPORT                 |
| 2YYR | STRUCTURAL ANALYSIS OF PHD DOMAIN OF PYGOPUS COMPLEXED WITH TRIMETHYLATED HISTONE H3 PEPTIDE                               | METAL BINDING PROTEIN             |
| 2Z0D | THE CRYSTAL STRUCTURE OF HUMAN ATG4B- LC3(1-120) COMPLEX                                                                   | HYDROLASE/STRUCTURAL PROTEIN      |
| 2Z0E | THE CRYSTAL STRUCTURE OF HUMAN ATG4B- LC3(1-124) COMPLEX                                                                   | HYDROLASE/STRUCTURAL PROTEIN      |
| 2Z23 | CRYSTAL STRUCTURE OF Y.PESTIS OLIGO PEPTIDE BINDING PROTEIN                                                                | PEPTIDE BINDING PROTEIN           |

| OPPA WITH TRI-LYSINE LIGAND |                                                                                                                                                                                                                                                                                                                          |                            |
|-----------------------------|--------------------------------------------------------------------------------------------------------------------------------------------------------------------------------------------------------------------------------------------------------------------------------------------------------------------------|----------------------------|
| 2Z2L                        | PENICILLIN-BINDING PROTEIN 2X (PBP2X) FROM STREPTOCOCCUS PNEUMONIAE                                                                                                                                                                                                                                                      | BIOSYNTHETIC PROTEIN       |
| 2Z2M                        | CEFDITOREN-ACYLATED PENICILLIN-BINDING PROTEIN 2X (PBP2X) FROM STREPTOCOCCUS PNEUMONIAE                                                                                                                                                                                                                                  | BIOSYNTHETIC PROTEIN       |
| 2Z2Q                        | CRYSTAL STRUCTURE OF FLOCK HOUSE VIRUS                                                                                                                                                                                                                                                                                   | VIRUS/RNA                  |
| 2Z2S                        | CRYSTAL STRUCTURE OF RHODOBACTER SPHAEROIDES SIGE IN COMPLEX WITH THE ANTI-SIGMA CHRR                                                                                                                                                                                                                                    | TRANSCRIPTION              |
| 2Z2T                        | CRYSTAL STRUCTURE OF THE COMPLEX BETWEEN GP41 FRAGMENT N36 AND FUSION INHIBITOR SC34EK                                                                                                                                                                                                                                   | VIRAL PROTEIN/INHIBITOR    |
| 2Z2Y                        | CRYSTAL STRUCTURE OF AUTOPROCESSED FORM OF TK-SUBTILISIN                                                                                                                                                                                                                                                                 | HYDROLASE                  |
| 2Z30                        | CRYSTAL STRUCTURE OF COMPLEX FORM BETWEEN MAT-TK-SUBTILISIN AND TK-PROPEPTIDE                                                                                                                                                                                                                                            | HYDROLASE                  |
| 2Z31                        | CRYSTAL STRUCTURE OF IMMUNE RECEPTOR COMPLEX                                                                                                                                                                                                                                                                             | IMMUNE SYSTEM              |
| 2Z3C                        | A MECHANISTIC VIEW OF ENZYME INHIBITION AND PEPTIDE HYDROLYSIS IN THE ACTIVE SITE OF THE SARS-COV 3C-LIKE PEPTIDASE                                                                                                                                                                                                      | HYDROLASE                  |
| 2Z3D                        | A MECHANISTIC VIEW OF ENZYME INHIBITION AND PEPTIDE HYDROLYSIS IN THE ACTIVE SITE OF THE SARS-COV 3C-LIKE PEPTIDASE                                                                                                                                                                                                      | HYDROLASE                  |
| 2Z3F                        | CRYSTAL STRUCTURE OF SPCIA1/ASF1 COMPLEXED WITH CAC2 PEPTIDE                                                                                                                                                                                                                                                             | CHAPERONE                  |
| 2Z3L                        | COMPLEX STRUCTURE OF LF-TRANSFERASE AND PEPTIDE A                                                                                                                                                                                                                                                                        | TRANSFERASE                |
| 2Z3N                        | COMPLEX STRUCTURE OF LF-TRANSFERASE AND PEPTIDE B                                                                                                                                                                                                                                                                        | TRANSFERASE                |
| 2Z3Q                        | CRYSTAL STRUCTURE OF THE IL-15/IL-15RA COMPLEX                                                                                                                                                                                                                                                                           | CYTOKINE/CYTOKINE RECEPTOR |
| 2Z3R                        | CRYSTAL STRUCTURE OF THE IL-15/IL-15RA COMPLEX                                                                                                                                                                                                                                                                           | CYTOKINE/CYTOKINE RECEPTOR |
| 2Z4E                        | CRYSTAL STRUCTURE OF D-DIMER FROM HUMAN FIBRIN COMPLEXED WITH GLY-HIS-ARG-PRO-TYR-AMIDE                                                                                                                                                                                                                                  | BLOOD CLOTING              |
| 2Z4J                        | CRYSTAL STRUCTURE OF AR LBD WITH SHP PEPTIDE NR BOX 2                                                                                                                                                                                                                                                                    | TRANSCRIPTION              |
| 2Z4K                        | CRYSTAL STRUCTURE OF THE BACTERIAL RIBOSOME FROM ESCHERICHIA COLI IN COMPLEX WITH PAROMOMYCIN AND RIBOSOME RECYCLING FACTOR (RRF). THIS FILE CONTAINS THE 30S SUBUNIT OF THE FIRST 70S RIBOSOME, WITH PAROMOMYCIN BOUND. THE ENTIRE CRYSTAL STRUCTURE CONTAINS TWO 70S RIBOSOMES AND IS DESCRIBED IN REMARK 400.         | RIBOSOME                   |
| 2Z4L                        | CRYSTAL STRUCTURE OF THE BACTERIAL RIBOSOME FROM ESCHERICHIA COLI IN COMPLEX WITH PAROMOMYCIN AND RIBOSOME RECYCLING FACTOR (RRF). THIS FILE CONTAINS THE 50S SUBUNIT OF THE FIRST 70S RIBOSOME, WITH PAROMOMYCIN AND RRF BOUND. THE ENTIRE CRYSTAL STRUCTURE CONTAINS TWO 70S RIBOSOMES AND IS DESCRIBED IN REMARK 400. | RIBOSOME                   |
| 2Z4M                        | CRYSTAL STRUCTURE OF THE BACTERIAL RIBOSOME FROM ESCHERICHIA COLI IN COMPLEX WITH PAROMOMYCIN AND RIBOSOME RECYCLING FACTOR (RRF). THIS FILE CONTAINS THE 30S SUBUNIT OF THE SECOND 70S RIBOSOME, WITH PAROMOMYCIN BOUND. THE ENTIRE CRYSTAL STRUCTURE CONTAINS TWO 70S RIBOSOMES AND IS                                 | RIBOSOME                   |

|      | DESCRIBED IN REMARK 400.                                                                                                                                                                                                                                                                                                  |                                       |
|------|---------------------------------------------------------------------------------------------------------------------------------------------------------------------------------------------------------------------------------------------------------------------------------------------------------------------------|---------------------------------------|
| 2Z4N | CRYSTAL STRUCTURE OF THE BACTERIAL RIBOSOME FROM ESCHERICHIA COLI IN COMPLEX WITH PAROMOMYCIN AND RIBOSOME RECYCLING FACTOR (RRF). THIS FILE CONTAINS THE 50S SUBUNIT OF THE SECOND 70S RIBOSOME, WITH PAROMOMYCIN AND RRF BOUND. THE ENTIRE CRYSTAL STRUCTURE CONTAINS TWO 70S RIBOSOMES AND IS DESCRIBED IN REMARK 400. | RIBOSOME                              |
| 2Z4Q | CRYSTAL STRUCTURE OF A MURINE ANTIBODY FAB 528                                                                                                                                                                                                                                                                            | IMMUNE SYSTEM                         |
| 2Z56 | CRYSTAL STRUCTURE OF G56S-PROPEPTIDE:S324A-SUBTILISIN COMPLEX                                                                                                                                                                                                                                                             | HYDROLASE                             |
| 2Z57 | CRYSTAL STRUCTURE OF G56E-PROPEPTIDE:S324A-SUBTILISIN COMPLEX                                                                                                                                                                                                                                                             | HYDROLASE                             |
| 2Z58 | CRYSTAL STRUCTURE OF G56W-PROPEPTIDE:S324A-SUBTILISIN COMPLEX                                                                                                                                                                                                                                                             | HYDROLASE                             |
| 2Z5C | CRYSTAL STRUCTURE OF A NOVEL CHAPERONE COMPLEX FOR YEAST 20S PROTEASOME ASSEMBLY                                                                                                                                                                                                                                          | CHAPERONE/HYDROLASE                   |
| 2Z5H | CRYSTAL STRUCTURE OF THE HEAD-TO-TAIL JUNCTION OF TROPOMYOSIN COMPLEXED WITH A FRAGMENT OF TNT                                                                                                                                                                                                                            | CONTRACTILE PROTEIN                   |
| 2Z5I | CRYSTAL STRUCTURE OF THE HEAD-TO-TAIL JUNCTION OF TROPOMYOSIN                                                                                                                                                                                                                                                             | CONTRACTILE PROTEIN                   |
| 2Z5K | COMPLEX OF TRANSPORTIN 1 WITH TAP NLS                                                                                                                                                                                                                                                                                     | TRANSPORT PROTEIN/RNA BINDING PROTEIN |
| 2Z5N | COMPLEX OF TRANSPORTIN 1 WITH HNRNP D NLS                                                                                                                                                                                                                                                                                 | TRANSPORT PROTEIN/RNA BINDING PROTEIN |
| 2Z5S | MOLECULAR BASIS FOR THE INHIBITION OF P53 BY MDMX                                                                                                                                                                                                                                                                         | CELL CYCLE                            |
| 2Z5T | MOLECULAR BASIS FOR THE INHIBITION OF P53 BY MDMX                                                                                                                                                                                                                                                                         | CELL CYCLE                            |
| 2Z65 | CRYSTAL STRUCTURE OF THE HUMAN TLR4 TV3 HYBRID-MD-2-ERITORAN COMPLEX                                                                                                                                                                                                                                                      | IMMUNE SYSTEM                         |
| 2Z6B | CRYSTAL STRUCTURE ANALYSIS OF (GP27-GP5)3 CONJUGATED WITH FE(III) PROTOPORPHYRIN                                                                                                                                                                                                                                          | HYDROLASE/STRUCTURAL PROTEIN          |
| 2Z6K | CRYSTAL STRUCTURE OF FULL-LENGTH HUMAN RPA14/32 HETERODIMER                                                                                                                                                                                                                                                               | REPLICATION                           |
| 2Z6N | CRYSTAL STRUCTURE OF CARBONMONOXY HEMOGLOBIN D FROM THE ALDABRA GIANT TORTOISE, GEOCHELONE GIGANTEA                                                                                                                                                                                                                       | TRANSPORT PROTEIN                     |
| 2Z6W | CRYSTAL STRUCTURE OF HUMAN CYCLOPHILIN D IN COMPLEX WITH CYCLOSPORIN A                                                                                                                                                                                                                                                    | ISOMERASE                             |
| 2Z7X | CRYSTAL STRUCTURE OF THE TLR1-TLR2 HETERODIMER INDUCED BY BINDING OF A TRI-ACYLATED LIPOPEPTIDE                                                                                                                                                                                                                           | IMMUNE SYSTEM                         |
| 2Z8C | PHOSPHORYLATED INSULIN RECEPTOR TYROSINE KINASE IN COMPLEX WITH (4-{{5-CARBAMOYL-4-(3-METHYLANILINO)PYRIMIDIN-2-YL}AMINO}PHENYL)ACETIC ACID                                                                                                                                                                               | TRANSFERASE                           |
| 2Z8I | CRYSTAL STRUCTURE OF ESCHERICHIA COLI GAMMA-GLUTAMYLTRANSPEPTIDASE IN COMPLEX WITH AZASERINE                                                                                                                                                                                                                              | TRANSFERASE                           |
| 2Z8J | CRYSTAL STRUCTURE OF ESCHERICHIA COLI GAMMA-GLUTAMYLTRANSPEPTIDASE IN COMPLEX WITH AZASERINE PREPARED IN THE DARK                                                                                                                                                                                                         | TRANSFERASE                           |
|      |                                                                                                                                                                                                                                                                                                                           | TRANSFERASE                           |

|      |                                                                                                                                |                                    |
|------|--------------------------------------------------------------------------------------------------------------------------------|------------------------------------|
| 2Z8K | CRYSTAL STRUCTURE OF ESCHERICHIA COLI GAMMA-GLUTAMYLTRANSPEPTIDASE IN COMPLEX WITH ACIVICIN                                    |                                    |
| 2Z8V | STRUCTURE OF AN IGNAR-AMA1 COMPLEX                                                                                             | IMMUNE SYSTEM                      |
| 2Z8W | STRUCTURE OF AN IGNAR-AMA1 COMPLEX                                                                                             | IMMUNE SYSTEM                      |
| 2Z8Y | XENON-BOUND STRUCTURE OF BIFUNCTIONAL CARBON MONOXIDE DEHYDROGENASE/ACETYL-COA SYNTHASE(CODH/ACS) FROM MOORELLA THERMOACETICA  | OXIDOREDUCTASE/TRANSFERASE         |
| 2Z91 | CRYSTAL STRUCTURE OF THE FAB FRAGMENT OF ANTI-CIGUATOXIN ANTIBODY 10C9                                                         | IMMUNE SYSTEM                      |
| 2Z92 | CRYSTAL STRUCTURE OF THE FAB FRAGMENT OF ANTI-CIGUATOXIN ANTIBODY 10C9 IN COMPLEX WITH CTX3C_ABCDE                             | IMMUNE SYSTEM                      |
| 2Z93 | CRYSTAL STRUCTURE OF FAB FRAGMENT OF ANTI-CIGUATOXIN ANTIBODY 10C9 IN COMPLEX WITH CTX3C-ABCD                                  | IMMUNE SYSTEM                      |
| 2Z9I | CRYSTAL STRUCTURE OF RV0983 FROM MYCOBACTERIUM TUBERCULOSIS-PROTEOLYTICALLY ACTIVE FORM                                        | HYDROLASE                          |
| 2ZA4 | CRYSTAL STRUCTURAL ANALYSIS OF BARNASE-BARSTAR COMPLEX                                                                         | HYDROLASE/HYDROLASE INHIBITOR      |
| 2ZAE | CRYSTAL STRUCTURE OF PROTEIN PH1601P IN COMPLEX WITH PROTEIN PH1771P OF ARCHAEAL RIBONUCLEASE P FROM PYROCOCCUS HORIKOSHII OT3 | HYDROLASE                          |
| 2ZAL | CRYSTAL STRUCTURE OF E. COLI ISOASPARTYL AMINOPEPTIDASE/L-ASPARAGINASE IN COMPLEX WITH L-ASPARTATE                             | HYDROLASE                          |
| 2ZBK | CRYSTAL STRUCTURE OF AN INTACT TYPE II DNA TOPOISOMERASE: INSIGHTS INTO DNA TRANSFER MECHANISMS                                | ISOMERASE                          |
| 2ZC3 | PENICILLIN-BINDING PROTEIN 2X (PBP 2X) ACYL-ENZYME COMPLEX (BIAPENEM) FROM STREPTOCOCCUS PNEUMONIAE                            | BIOSYNTHETIC PROTEIN               |
| 2ZC4 | PENICILLIN-BINDING PROTEIN 2X (PBP 2X) ACYL-ENZYME COMPLEX (TEBIPENEM) FROM STREPTOCOCCUS PNEUMONIAE                           | BIOSYNTHETIC PROTEIN               |
| 2ZC5 | PENICILLIN-BINDING PROTEIN 1A (PBP 1A) ACYL-ENZYME COMPLEX (BIAPENEM) FROM STREPTOCOCCUS PNEUMONIAE                            | BIOSYNTHETIC PROTEIN               |
| 2ZC6 | PENICILLIN-BINDING PROTEIN 1A (PBP 1A) ACYL-ENZYME COMPLEX (TEBIPENEM) FROM STREPTOCOCCUS PNEUMONIAE                           | BIOSYNTHETIC PROTEIN               |
| 2ZC9 | THROMBIN IN COMPLEX WITH INHIBITOR                                                                                             | BLOOD CLOTTING/HYDROLASE INHIBITOR |
| 2ZCF | MUTATIONAL STUDY ON ALPHA-GLN90 OF FE-TYPE NITRILE HYDRATASE FROM RHODOCOCCUS SP. N771                                         | LYASE                              |
| 2ZCH | CRYSTAL STRUCTURE OF HUMAN PROSTATE SPECIFIC ANTIGEN COMPLEXED WITH AN ACTIVATING ANTIBODY                                     | IMMUNE SYSTEM                      |
| 2ZCK | CRYSTAL STRUCTURE OF A TERNARY COMPLEX BETWEEN PSA, A SUBSTRAT-ACYL INTERMEDIATE AND AN ACTIVATING ANTIBODY                    | IMMUNE SYSTEM                      |
| 2ZCL | CRYSTAL STRUCTURE OF HUMAN PROSTATE SPECIFIC ANTIGEN COMPLEXED WITH AN ACTIVATING ANTIBODY                                     | IMMUNE SYSTEM                      |
| 2ZCY | YEAST 20S PROTEASOME:SYRINGOLIN A-COMPLEX                                                                                      | HYDROLASE                          |
| 2ZD1 | CRYSTAL STRUCTURE OF HIV-1 REVERSE TRANSCRIPTASE (RT) IN COMPLEX WITH TMC278 (RILPIVIRINE), A NON-NUCLEOSIDE RT                | TRANSFERASE, HYDROLASE             |



|      | INHIBITOR                                                                                                                                    |                                    |
|------|----------------------------------------------------------------------------------------------------------------------------------------------|------------------------------------|
| 2ZD7 | THE STRUCTURE OF VPS75 (VACUOLAR PROTEIN SORTING-ASSOCIATED PROTEIN 75)                                                                      | PROTEIN TRANSPORT                  |
| 2ZDA | EXPLORING THROMBIN S1 POCKET                                                                                                                 | BLOOD CLOTTING/HYDROLASE INHIBITOR |
| 2ZDI | CRYSTAL STRUCTURE OF PREFOLDIN FROM PYROCOCCLUS HORIKOSHII OT3                                                                               | CHAPERONE                          |
| 2ZDV | EXPLORING THROMBIN S1 POCKET                                                                                                                 | BLOOD CLOTTING/HYDROLASE INHIBITOR |
| 2ZE2 | CRYSTAL STRUCTURE OF L100I/K103N MUTANT HIV-1 REVERSE TRANSCRIPTASE (RT) IN COMPLEX WITH TMC278 (RILPIVIRINE), A NON-NUCLEOSIDE RT INHIBITOR | TRANSFERASE, HYDROLASE             |
| 2ZET | CRYSTAL STRUCTURE OF THE SMALL GTPASE RAB27B COMPLEXED WITH THE SLP HOMOLOGY DOMAIN OF SLAC2-A/MELANOPHILIN                                  | SIGNALING PROTEIN                  |
| 2ZF0 | EXPLORING THROMBIN S1 POCKET                                                                                                                 | BLOOD CLOTTING/HYDROLASE INHIBITOR |
| 2ZFB | CRYSTAL STRUCTURE OF PARROT HEMOGLOBIN (PSITTACULA KRAMERI) AT PH 7.5                                                                        | METAL BINDING PROTEIN              |
| 2ZFD | THE CRYSTAL STRUCTURE OF PLANT SPECIFIC CALCIUM BINDING PROTEIN ATCBL2 IN COMPLEX WITH THE REGULATORY DOMAIN OF ATCIPK14                     | SIGNALING PROTEIN/TRANSFERASE      |
| 2ZFO | STRUCTURE OF THE PARTIALLY UNLIGANDED MET STATE OF 400 KDA HEMOGLOBIN: INSIGHTS INTO LIGAND-INDUCED STRUCTURAL CHANGES OF GIANT HEMOGLOBINS  | OXYGEN BINDING, TRANSPORT PROTEIN  |
| 2ZHX | CRYSTAL STRUCTURE OF URACIL-DNA GLYCOSYLASE FROM MYCOBACTERIUM TUBERCULOSIS IN COMPLEX WITH A PROTEINACEOUS INHIBITOR                        | HYDROLASE/HYDROLASE INHIBITOR      |
| 2ZIT | STRUCTURE OF THE EEF2-EXO-A-NAD+ COMPLEX                                                                                                     | BIOSYNTHETIC PROTEIN/TRANSFERASE   |
| 2ZIU | CRYSTAL STRUCTURE OF THE MUS81-EME1 COMPLEX                                                                                                  | HYDROLASE                          |
| 2ZIV | CRYSTAL STRUCTURE OF THE MUS81-EME1 COMPLEX                                                                                                  | HYDROLASE                          |
| 2ZIW | CRYSTAL STRUCTURE OF THE MUS81-EME1 COMPLEX                                                                                                  | HYDROLASE                          |
| 2ZIX | CRYSTAL STRUCTURE OF THE MUS81-EME1 COMPLEX                                                                                                  | HYDROLASE                          |
| 2ZJD | CRYSTAL STRUCTURE OF LC3-P62 COMPLEX                                                                                                         | APOPTOSIS INHIBITOR/APOPTOSIS      |
| 2ZJP | THIOPEPTIDE ANTIBIOTIC NOSIHEPTIDE BOUND TO THE LARGE RIBOSOMAL SUBUNIT OF DEINOCOCCUS RADIODURANS                                           | RIBOSOME                           |
| 2ZJQ | INTERACTION OF L7 WITH L11 INDUCED BY MICROCCOCIN BINDING TO THE DEINOCOCCUS RADIODURANS 50S SUBUNIT                                         | RIBOSOME                           |
| 2ZJR | REFINED NATIVE STRUCTURE OF THE LARGE RIBOSOMAL SUBUNIT (50S) FROM DEINOCOCCUS RADIODURANS                                                   | RIBOSOME                           |
| 2ZJS | CRYSTAL STRUCTURE OF SECYE TRANSLOCON FROM THERMUS THERMOPHILUS WITH A FAB FRAGMENT                                                          | PROTEIN TRANSPORT/IMMUNE SYSTEM    |
| 2ZL1 | MP1-P14 SCAFFOLDING COMPLEX                                                                                                                  | PROTEIN BINDING                    |
| 2ZL2 | CRYSTAL STRUCTURE OF H.PYLORI CLPP IN COMPLEX WITH THE PEPTIDE NVLGFTQ                                                                       | HYDROLASE                          |
|      |                                                                                                                                              | HYDROLASE                          |

|      |                                                                                                                                                             |                                  |
|------|-------------------------------------------------------------------------------------------------------------------------------------------------------------|----------------------------------|
| 2ZL4 | CRYSTAL STRUCTURE OF H.PYLORI CLPP S99A IN COMPLEX WITH THE PEPTIDE AAAAA                                                                                   | HORMONE                          |
| 2ZL9 | 2-SUBSTITUTED-16-ENE-22-THIA-1ALPHA,25-DIHYDROXY-26,27-DIMETHYL-19-NORVITAMIN D3 ANALOGS: SYNTHESIS, BIOLOGICAL EVALUATION AND CRYSTAL STRUCTURE            | HORMONE                          |
| 2ZLA | 2-SUBSTITUTED-16-ENE-22-THIA-1ALPHA,25-DIHYDROXY-26,27-DIMETHYL-19-NORVITAMIN D3 ANALOGS: SYNTHESIS, BIOLOGICAL EVALUATION AND CRYSTAL STRUCTURE            | HORMONE                          |
| 2ZLC | 2-SUBSTITUTED-16-ENE-22-THIA-1ALPHA,25-DIHYDROXY-26,27-DIMETHYL-19-NORVITAMIN D3 ANALOGS: SYNTHESIS, BIOLOGICAL EVALUATION AND CRYSTAL STRUCTURE            | HYDROLASE                        |
| 2ZLE | CRYO-EM STRUCTURE OF DEGP12/OMP                                                                                                                             | OXIDOREDUCTASE                   |
| 2ZLF | THE STRUCTURAL BASIS FOR PEPTIDOMIMETIC INHIBITION OF EUKARYOTIC RIBONUCLEOTIDE REDUCTASE                                                                   |                                  |
| 2ZLT | HORSE METHEMOGLOBIN HIGH SALT, PH 7.0                                                                                                                       | OXYGEN STORAGE, OXYGEN TRANSPORT |
| 2ZLU | HORSE METHEMOGLOBIN HIGH SALT, PH 7.0 (88% RELATIVE HUMIDITY)                                                                                               | OXYGEN STORAGE, OXYGEN TRANSPORT |
| 2ZLV | HORSE METHEMOGLOBIN HIGH SALT, PH 7.0 (79% RELATIVE HUMIDITY)                                                                                               | OXYGEN STORAGE, OXYGEN TRANSPORT |
| 2ZLW | HORSE METHEMOGLOBIN HIGH SALT, PH 7.0 (75% RELATIVE HUMIDITY)                                                                                               | OXYGEN STORAGE, OXYGEN TRANSPORT |
| 2ZLX | HORSE METHEMOGLOBIN HIGH SALT, PH 7.0 (66% RELATIVE HUMIDITY)                                                                                               | OXYGEN STORAGE, OXYGEN TRANSPORT |
| 2ZME | INTEGRATED STRUCTURAL AND FUNCTIONAL MODEL OF THE HUMAN ESCRT-II COMPLEX                                                                                    | PROTEIN TRANSPORT                |
| 2ZMH | CRYSTAL STRUCTURE OF RAT VITAMIN D RECEPTOR BOUND TO ADAMANTYL VITAMIN D ANALOGS: STRUCTURAL BASIS FOR VITAMIN D RECEPTOR ANTAGONISM AND/OR PARTIAL AGONISM | TRANSCRIPTION                    |
| 2ZMI | CRYSTAL STRUCTURE OF RAT VITAMIN D RECEPTOR BOUND TO ADAMANTYL VITAMIN D ANALOGS: STRUCTURAL BASIS FOR VITAMIN D RECEPTOR ANTAGONISM AND/OR PARTIAL AGONISM | TRANSCRIPTION                    |
| 2ZMJ | CRYSTAL STRUCTURE OF RAT VITAMIN D RECEPTOR BOUND TO ADAMANTYL VITAMIN D ANALOGS: STRUCTURAL BASIS FOR VITAMIN D RECEPTOR ANTAGONISM AND/OR PARTIAL AGONISM | TRANSCRIPTION                    |
| 2ZNE | CRYSTAL STRUCTURE OF ZN <sup>2+</sup> -BOUND FORM OF DES3-23ALG-2 COMPLEXED WITH ALIX ABS PEPTIDE                                                           | APOPTOSIS                        |
| 2ZNL | CRYSTAL STRUCTURE OF PA-PB1 COMPLEX FORM INFLUENZA VIRUS RNA POLYMERASE                                                                                     | TRANSCRIPTION                    |
| 2ZNV | CRYSTAL STRUCTURE OF HUMAN AMSH-LP DUB DOMAIN IN COMPLEX WITH LYS63-LINKED UBIQUITIN DIMER                                                                  | HYDROLASE/SIGNALING PROTEIN      |
| 2ZOE | HA3 SUBCOMPONENT OF CLOSTRIDIUM BOTULINUM TYPE C PROGENITOR TOXIN, COMPLEX WITH N-ACETYLNEURAMIC ACID                                                       | TOXIN                            |
| 2ZOK | CRYSTAL STRUCTURE OF H-2DB IN COMPLEX WITH JHMV EPIPOPE S510                                                                                                | IMMUNE SYSTEM                    |
| 2ZOL | CRYSTAL STRUCTURE OF H-2DB IN COMPLEX WITH THE W513S VARIANT OF JHMV EPIPOPE S510                                                                           | IMMUNE SYSTEM                    |

|      |                                                                                                                                                                                      |                                     |
|------|--------------------------------------------------------------------------------------------------------------------------------------------------------------------------------------|-------------------------------------|
| 2ZP0 | HUMAN FACTOR VIIA-TISSUE FACTOR COMPLEXED WITH BENZYL-SULFONAMIDE-D-ILE-GLN-P-AMINOBENZAMIDINE                                                                                       | HYDROLASE/BLOOD CLOTTING            |
| 2ZP6 | CRYSTAL STRUCTURE OF BOVINE INSULIN (HEXAMERIC FORM)                                                                                                                                 | HORMONE                             |
| 2ZPB | NITROSYLATED FE-TYPE NITRILE HYDRATASE                                                                                                                                               | LYASE                               |
| 2ZPE | NITROSYLATED FE-TYPE NITRILE HYDRATASE WITH TERT-BUTYLISONITRILE                                                                                                                     | LYASE                               |
| 2ZPF | COMPLEX OF FE-TYPE NITRILE HYDRATASE WITH TERT-BUTYLISONITRILE, PHOTO-ACTIVATED FOR 18MIN AT 293K                                                                                    | LYASE                               |
| 2ZPG | COMPLEX OF FE-TYPE NITRILE HYDRATASE WITH TERT-BUTYLISONITRILE, PHOTO-ACTIVATED FOR 120MIN AT 293K                                                                                   | LYASE                               |
| 2ZPH | COMPLEX OF FE-TYPE NITRILE HYDRATASE WITH TERT-BUTYLISONITRILE, PHOTO-ACTIVATED FOR 340MIN AT 293K                                                                                   | LYASE                               |
| 2ZPI | COMPLEX OF FE-TYPE NITRILE HYDRATASE WITH TERT-BUTYLISONITRILE, PHOTO-ACTIVATED FOR 440MIN AT 293K                                                                                   | LYASE                               |
| 2ZPP | NEUTRON CRYSTAL STRUCTURE OF CUBIC INSULIN AT PD9                                                                                                                                    | HORMONE                             |
| 2ZPY | CRYSTAL STRUCTURE OF THE MOUSE RADXIN FERM DOMAIN COMPLEXED WITH THE MOUSE CD44 CYTOPLASMIC PEPTIDE                                                                                  | CELL ADHESION                       |
| 2ZS6 | HA3 SUBCOMPONENT OF BOTULINUM TYPE C PROGENITOR TOXIN                                                                                                                                | TOXIN                               |
| 2ZSH | STRUCTURAL BASIS OF GIBBERELLIN(GA3)-INDUCED DELLA RECOGNITION BY THE GIBBERELLIN RECEPTOR                                                                                           | HORMONE RECEPTOR                    |
| 2ZSI | STRUCTURAL BASIS OF GIBBERELLIN(GA4)-INDUCED DELLA RECOGNITION BY THE GIBBERELLIN RECEPTOR                                                                                           | HORMONE RECEPTOR                    |
| 2ZSV | CRYSTAL STRUCTURE OF H-2KB IN COMPLEX WITH JHMV EPITOPE S598                                                                                                                         | IMMUNE SYSTEM                       |
| 2ZSW | CRYSTAL STRUCTURE OF H-2KB IN COMPLEX WITH THE Q600Y VARIANT OF JHMV EPITOPE S598                                                                                                    | IMMUNE SYSTEM                       |
| 32C2 | STRUCTURE OF AN ACTIVITY SUPPRESSING FAB FRAGMENT TO CYTOCHROME P450 AROMATASE                                                                                                       | IMMUNE SYSTEM                       |
| 35C8 | CATALYTIC ANTIBODY 5C8, FAB-INHIBITOR COMPLEX                                                                                                                                        | CATALYTIC ANTIBODY                  |
| 3AIY | R6 HUMAN INSULIN HEXAMER (SYMMETRIC), NMR, REFINED AVERAGE STRUCTURE                                                                                                                 | HORMONE/GROWTH FACTOR               |
| 3AT1 | CRYSTAL STRUCTURES OF PHOSPHONOACETAMIDE LIGATED T AND PHOSPHONOACETAMIDE AND MALONATE LIGATED R STATES OF ASPARTATE CARBAMOYLTRANSFERASE AT 2.8-ANGSTROMS RESOLUTION AND NEUTRAL PH | TRANSFERASE (CARBAMOYL-P,ASPARTATE) |
| 3B2U | CRYSTAL STRUCTURE OF ISOLATED DOMAIN III OF THE EXTRACELLULAR REGION OF THE EPIDERMAL GROWTH FACTOR RECEPTOR IN COMPLEX WITH THE FAB FRAGMENT OF IMC-11F8                            | IMMUNE SYSTEM/TRANSFERASE           |
| 3B2V | CRYSTAL STRUCTURE OF THE EXTRACELLULAR REGION OF THE EPIDERMAL GROWTH FACTOR RECEPTOR IN COMPLEX WITH THE FAB FRAGMENT OF IMC-11F8                                                   | IMMUNE SYSTEM/TRANSFERASE           |
| 3B3I | CITRULLINATION-DEPENDENT DIFFERENTIAL PRESENTATION OF A SELF-PEPTIDE BY HLA-B27 SUBTYPES                                                                                             | IMMUNE SYSTEM                       |
|      |                                                                                                                                                                                      | CELL ADHESION                       |

|      |                                                                                                                                                  |                                     |
|------|--------------------------------------------------------------------------------------------------------------------------------------------------|-------------------------------------|
| 3B3Q | CRYSTAL STRUCTURE OF A SYNAPTIC ADHESION COMPLEX                                                                                                 | HORMONE REGULATOR COMPLEX           |
| 3B4V | X-RAY STRUCTURE OF ACTIVIN IN COMPLEX WITH FSTL3                                                                                                 | MEMBRANE PROTEIN                    |
| 3B5N | STRUCTURE OF THE YEAST PLASMA MEMBRANE SNARE COMPLEX                                                                                             | STRUCTURAL PROTEIN/DNA              |
| 3B6F | NUCLEOSOME CORE PARTICLE TREATED WITH CISPLATIN                                                                                                  | STRUCTURAL PROTEIN/DNA              |
| 3B6G | NUCLEOSOME CORE PARTICLE TREATED WITH OXALIPLATIN                                                                                                | IMMUNE SYSTEM                       |
| 3B6S | CRYSTAL STRUCTURE OF HLA-B*2705 COMPLEXED WITH THE CITRULLINATED VASOACTIVE INTESTINAL PEPTIDE TYPE 1 RECEPTOR (VIPR) PEPTIDE (RESIDUES 400-408) | PROTEIN BINDING                     |
| 3B71 | CD4 ENDOCYTOSIS MOTIF BOUND TO THE FOCAL ADHESION TARGETING (FAT) DOMAIN OF THE FOCAL ADHESION KINASE                                            | TRANSPORT PROTEIN, OXYGEN BINDING   |
| 3B75 | CRYSTAL STRUCTURE OF GLYCATED HUMAN HAEMOGLOBIN                                                                                                  | BIOSYNTHETIC PROTEIN/TRANSFERASE    |
| 3B78 | STRUCTURE OF THE EEF2-EXO(A551H)-NAD <sup>+</sup> COMPLEX                                                                                        | HYDROLASE                           |
| 3B7S | [E296Q]LTA4H IN COMPLEX WITH RSR SUBSTRATE                                                                                                       | HYDROLASE                           |
| 3B7T | [E296Q]LTA4H IN COMPLEX WITH ARG-ALA-ARG SUBSTRATE                                                                                               | HYDROLASE                           |
| 3B7V | HIV-1 PROTEASE COMPLEXED WITH GEM-DIOL-AMINE TETRAHEDRAL INTERMEDIATE NLLTQI                                                                     | HYDROLASE                           |
| 3B80 | HIV-1 PROTEASE MUTANT I54V COMPLEXED WITH GEM-DIOL-AMINE INTERMEDIATE NLLTQI                                                                     | BIOSYNTHETIC PROTEIN/TRANSFERASE    |
| 3B82 | STRUCTURE OF THE EEF2-EXO(A546H)-NAD <sup>+</sup> COMPLEX                                                                                        | HYDROLASE/TRANSPORT PROTEIN         |
| 3B8E | CRYSTAL STRUCTURE OF THE SODIUM-POTASSIUM PUMP                                                                                                   | BIOSYNTHETIC PROTEIN/TRANSFERASE    |
| 3B8H | STRUCTURE OF THE EEF2-EXO(A546A)-NAD <sup>+</sup> COMPLEX                                                                                        | TRANSFERASE/STRUCTURAL PROTEIN      |
| 3B95 | EUHMT1 (GLP) ANKYRIN REPEAT DOMAIN (STRUCTURE 2)                                                                                                 | HYDROLASE/HYDROLASE INHIBITOR       |
| 3B9F | 1.6 A STRUCTURE OF THE PCI-THROMBIN-HEPARIN COMPLEX                                                                                              | OXIDOREDUCTASE                      |
| 3B9J | STRUCTURE OF XANTHINE OXIDASE WITH 2-HYDROXY-6-METHYLPURINE                                                                                      | IMMUNE SYSTEM                       |
| 3B9K | CRYSTAL STRUCTURE OF CD8ALPHA-BETA IN COMPLEX WITH YTS 156.7 FAB                                                                                 | IMMUNE SYSTEM                       |
| 3BAE | CRYSTAL STRUCTURE OF FAB WO2 BOUND TO THE N TERMINAL DOMAIN OF AMYLOID BETA PEPTIDE (1-28)                                                       | RIBOSOME                            |
| 3BBN | HOMOLOGY MODEL FOR THE SPINACH CHLOROPLAST 30S SUBUNIT FITTED TO 9.4A CRYO-EM MAP OF THE 70S CHLORORIBOSOME.                                     | RIBOSOME                            |
| 3BBO | HOMOLOGY MODEL FOR THE SPINACH CHLOROPLAST 50S SUBUNIT FITTED TO 9.4A CRYO-EM MAP OF THE 70S CHLORORIBOSOME                                      | PROTEIN TRANSPORT/SPLICING          |
| 3BBP | RAB6-GTP:GCC185 RAB BINDING DOMAIN COMPLEX                                                                                                       | SIGNALING PROTEIN/TRANSPORT PROTEIN |
| 3BC1 | CRYSTAL STRUCTURE OF THE COMPLEX RAB27A-SLP2A                                                                                                    | OXIDOREDUCTASE                      |
| 3BCC | STIGMATELLIN AND ANTIMYCIN BOUND CYTOCHROME BC1 COMPLEX FROM CHICKEN                                                                             | TRANSPORT PROTEIN/OXYGEN BINDING    |
| 3BCQ | CRYSTAL STRUCTURE OF OXY-HEMOGLOBIN FROM BRYCON CEPHALUS                                                                                         | HYDROLASE                           |
| 3BDG | CRYSTAL STRUCTURE OF WILD-TYPE/T155V MIXED DIMER OF E. COLI                                                                                      |                                     |

|      | ALKALINE PHOSPHATASE                                                                                                                         |                               |
|------|----------------------------------------------------------------------------------------------------------------------------------------------|-------------------------------|
| 3BDM | YEAST 20S PROTEASOME:GLIDOBACTIN A-COMPLEX                                                                                                   | HYDROLASE                     |
| 3BDW | HUMAN CD94/NKG2A                                                                                                                             | IMMUNE SYSTEM RECEPTOR        |
| 3BDY | FAB COMPLEX STRUCTURE                                                                                                                        | HORMONE                       |
| 3BE1 | FAB/RECEPTOR COMPLEX                                                                                                                         | TRANSFERASE                   |
| 3BEF | CRYSTAL STRUCTURE OF THROMBIN BOUND TO THE EXTRACELLULAR FRAGMENT OF PAR1                                                                    | HYDROLASE                     |
| 3BEG | CRYSTAL STRUCTURE OF SR PROTEIN KINASE 1 COMPLEXED TO ITS SUBSTRATE ASF/SF2                                                                  | TRANSFERASE/SPLICING          |
| 3BEI | CRYSTAL STRUCTURE OF THE SLOW FORM OF THROMBIN IN A SELF_INHIBITED CONFORMATION                                                              | HYDROLASE                     |
| 3BEJ | STRUCTURE OF HUMAN FXR IN COMPLEX WITH MFA-1 AND CO-ACTIVATOR PEPTIDE                                                                        | TRANSCRIPTION REGULATOR       |
| 3BES | STRUCTURE OF A POXVIRUS IFNGBP/IFNG COMPLEX                                                                                                  | IMMUNE SYSTEM                 |
| 3BEV | 11MER STRUCTURE OF AN MHC CLASS I MOLECULE FROM B21 CHICKENS ILLUSTRATE PROMISCUOUS PEPTIDE BINDING                                          | IMMUNE SYSTEM                 |
| 3BEW | 10MER CRYSTAL STRUCTURE OF CHICKEN MHC CLASS I HAPLOTYPE B21                                                                                 | IMMUNE SYSTEM                 |
| 3BF6 | THROMBIN:SURAMIN COMPLEX                                                                                                                     | HYDROLASE                     |
| 3BG0 | ARCHITECTURE OF A COAT FOR THE NUCLEAR PORE MEMBRANE                                                                                         | PROTEIN TRANSPORT, HYDROLASE  |
| 3BG1 | ARCHITECTURE OF A COAT FOR THE NUCLEAR PORE MEMBRANE                                                                                         | PROTEIN TRANSPORT, HYDROLASE  |
| 3BG4 | THE CRYSTAL STRUCTURE OF GUAMERIN IN COMPLEX WITH CHYMOTRYPSIN AND THE DEVELOPMENT OF AN ELASTASE-SPECIFIC INHIBITOR                         | HYDROLASE/HYDROLASE INHIBITOR |
| 3BGF | X-RAY CRYSTAL STRUCTURE OF THE SARS CORONAVIRUS SPIKE RECEPTOR BINDING DOMAIN IN COMPLEX WITH F26G19 FAB                                     | VIRAL PROTEIN/IMMUNE SYSTEM   |
| 3BGM | CRYSTAL STRUCTURE OF PKD2 PHOSHOPEPTIDE BOUND TO HUMAN CLASS I MHC HLA-A2                                                                    | IMMUNE SYSTEM                 |
| 3BGO | AZIDE COMPLEX OF ENGINEERED SUBTILISIN SUBT_BACAM                                                                                            | HYDROLASE                     |
| 3BGR | CRYSTAL STRUCTURE OF K103N/Y181C MUTANT HIV-1 REVERSE TRANSCRIPTASE (RT) IN COMPLEX WITH TMC278 (RILPIVIRINE), A NON-NUCLEOSIDE RT INHIBITOR | TRANSFERASE, HYDROLASE        |
| 3BH6 | CRYSTAL STRUCTURE OF THE RP2-ARL3 COMPLEX BOUND TO GPPNHP                                                                                    | SIGNALING PROTEIN             |
| 3BH7 | CRYSTAL STRUCTURE OF THE RP2-ARL3 COMPLEX BOUND TO GDP-ALF4                                                                                  | SIGNALING PROTEIN             |
| 3BH8 | CRYSTAL STRUCTURE OF RQA_M PHOSHOPEPTIDE BOUND TO HUMAN CLASS I MHC HLA-A2                                                                   | IMMUNE SYSTEM                 |
| 3BH9 | CRYSTAL STRUCTURE OF RTY PHOSHOPEPTIDE BOUND TO HUMAN CLASS I MHC HLA-A2                                                                     | IMMUNE SYSTEM                 |
| 3BHB | CRYSTAL STRUCTURE OF KMD PHOSHOPEPTIDE BOUND TO HUMAN CLASS I MHC HLA-A2                                                                     | IMMUNE SYSTEM                 |
| 3BHT | STRUCTURE OF PHOSPHORYLATED THR160 CDK2/CYCLIN A IN COMPLEX                                                                                  | TRANSFERASE                   |

|      | WITH THE INHIBITOR MERIOLIN 3                                                                                               |                               |
|------|-----------------------------------------------------------------------------------------------------------------------------|-------------------------------|
| 3BHU | STRUCTURE OF PHOSPHORYLATED THR160 CDK2/CYCLIN A IN COMPLEX WITH THE INHIBITOR MERIOLIN 5                                   | TRANSFERASE                   |
| 3BHV | STRUCTURE OF PHOSPHORYLATED THR160 CDK2/CYCLIN A IN COMPLEX WITH THE INHIBITOR VARIOLIN B                                   | TRANSFERASE                   |
| 3BII | CRYSTAL STRUCTURE OF ACTIVATED MPT SYNTHASE                                                                                 | TRANSFERASE                   |
| 3BIM | CRYSTAL STRUCTURE OF THE BCL6 BTB DOMAIN DIMER IN COMPLEX WITH THE BCOR BBD COREPRESSOR PEPTIDE                             | TRANSCRIPTION REPRESSOR       |
| 3BIN | STRUCTURE OF THE DAL-1 AND TSLC1 (372-383) COMPLEX                                                                          | CELL ADHESION                 |
| 3BIU | HUMAN THROMBIN-IN COMPLEX WITH UB-THR10                                                                                     | HYDROLASE/HYDROLASE INHIBITOR |
| 3BIV | HUMAN THROMBIN-IN COMPLEX WITH UB-THR11                                                                                     | HYDROLASE/HYDROLASE INHIBITOR |
| 3BIW | CRYSTAL STRUCTURE OF THE NEUROLIGIN-1/NEUREXIN-1BETA SYNAPTIC ADHESION COMPLEX                                              | CELL ADHESION/CELL ADHESION   |
| 3BJ1 | MET-PERCH HEMOGLOBIN AT PH 5.7                                                                                              | OXYGEN BINDING                |
| 3BJ2 | MET-PERCH HEMOGLOBIN AT PH 6.3                                                                                              | OXYGEN BINDING                |
| 3BJ3 | MET-PERCH HEMOGLOBIN AT PH 8.0                                                                                              | OXYGEN BINDING                |
| 3BJI | STRUCTURAL BASIS OF PROMISCUOUS GUANINE NUCLEOTIDE EXCHANGE BY THE T-CELL ESSENTIAL VAV1                                    | SIGNALING PROTEIN             |
| 3BK3 | CRYSTAL STRUCTURE OF THE COMPLEX OF BMP-2 AND THE FIRST VON WILLEBRAND DOMAIN TYPE C OF CROSSVEINLESS-2                     | HORMONE/GROWTH FACTOR         |
| 3BKC | CRYSTAL STRUCTURE OF ANTI-AMYLOID BETA FAB WO2 (P21, FORMB)                                                                 | IMMUNE SYSTEM                 |
| 3BKJ | CRYSTAL STRUCTURE OF FAB WO2 BOUND TO THE N TERMINAL DOMAIN OF AMYLOID BETA PEPTIDE (1-16)                                  | IMMUNE SYSTEM                 |
| 3BKM | STRUCTURE OF ANTI-AMYLOID-BETA FAB WO2 (FORM A, P212121)                                                                    | IMMUNE SYSTEM                 |
| 3BKY | CRYSTAL STRUCTURE OF CHIMERIC ANTIBODY C2H7 FAB IN COMPLEX WITH A CD20 PEPTIDE                                              | IMMUNE SYSTEM                 |
| 3BL2 | CRYSTAL STRUCTURE OF M11, THE BCL-2 HOMOLOG OF MURINE GAMMA-HERPESVIRUS 68, COMPLEXED WITH MOUSE BECLIN1 (RESIDUES 106-124) | VIRAL PROTEIN/APOPTOSIS       |
| 3BLH | CRYSTAL STRUCTURE OF HUMAN CDK9/CYCLINT1                                                                                    | TRANSCRIPTION                 |
| 3BLQ | CRYSTAL STRUCTURE OF HUMAN CDK9/CYCLINT1 IN COMPLEX WITH ATP                                                                | TRANSCRIPTION                 |
| 3BLR | CRYSTAL STRUCTURE OF HUMAN CDK9/CYCLINT1 IN COMPLEX WITH FLAVOPIRIDOL                                                       | TRANSCRIPTION                 |
| 3BLV | YEAST ISOCITRATE DEHYDROGENASE WITH CITRATE BOUND IN THE REGULATORY SUBUNITS                                                | OXIDOREDUCTASE                |
| 3BLW | YEAST ISOCITRATE DEHYDROGENASE WITH CITRATE AND AMP BOUND IN THE REGULATORY SUBUNITS                                        | OXIDOREDUCTASE                |
| 3BLX | YEAST ISOCITRATE DEHYDROGENASE (APO FORM)                                                                                   | OXIDOREDUCTASE                |
| 3BMC | STRUCTURE OF PTERIDINE REDUCTASE 1 (PTR1) FROM TRYPANOSOMA BRUCEI IN TERNARY COMPLEX WITH COFACTOR (NADP+) AND              | OXIDOREDUCTASE                |

| SUBSTRATE (FOLATE) |                                                                                                                                         |                               |
|--------------------|-----------------------------------------------------------------------------------------------------------------------------------------|-------------------------------|
| 3BME               | STRUCTURE OF PTERIDINE REDUCTASE 1 (PTR1) FROM TRYPANOSOMA BRUCEI IN TERNARY COMPLEX WITH COFACTOR (NADP+) AND INHIBITOR (COMPOUND DX2) | OXIDOREDUCTASE                |
| 3BMF               | STRUCTURE OF PTERIDINE REDUCTASE 1 (PTR1) FROM TRYPANOSOMA BRUCEI IN TERNARY COMPLEX WITH COFACTOR (NADP+) AND INHIBITOR DX3            | OXIDOREDUCTASE                |
| 3BMG               | STRUCTURE OF PTERIDINE REDUCTASE 1 (PTR1) FROM TRYPANOSOMA BRUCEI IN TERNARY COMPLEX WITH COFACTOR (NADP+) AND INHIBITOR (COMPOUND DX4) | OXIDOREDUCTASE                |
| 3BMH               | STRUCTURE OF PTERIDINE REDUCTASE 1 (PTR1) FROM TRYPANOSOMA BRUCEI IN TERNARY COMPLEX WITH COFACTOR (NADP+) AND INHIBITOR (COMPOUND DX6) | OXIDOREDUCTASE                |
| 3BML               | STRUCTURE OF PTERIDINE REDUCTASE 1 (PTR1) FROM TRYPANOSOMA BRUCEI IN TERNARY COMPLEX WITH COFACTOR (NADP+) AND INHIBITOR (COMPOUND AX1) | OXIDOREDUCTASE                |
| 3BMM               | STRUCTURE OF PTERIDINE REDUCTASE 1 (PTR1) FROM TRYPANOSOMA BRUCEI IN TERNARY COMPLEX WITH COFACTOR (NADP+) AND INHIBITOR (COMPOUND AX2) | OXIDOREDUCTASE                |
| 3BMN               | STRUCTURE OF PTERIDINE REDUCTASE 1 (PTR1) FROM TRYPANOSOMA BRUCEI IN TERNARY COMPLEX WITH COFACTOR (NADP+) AND INHIBITOR (COMPOUND AX3) | OXIDOREDUCTASE                |
| 3BMO               | STRUCTURE OF PTERIDINE REDUCTASE 1 (PTR1) FROM TRYPANOSOMA BRUCEI IN TERNARY COMPLEX WITH COFACTOR (NADP+) AND INHIBITOR (COMPOUND AX4) | OXIDOREDUCTASE                |
| 3BMQ               | STRUCTURE OF PTERIDINE REDUCTASE 1 (PTR1) FROM TRYPANOSOMA BRUCEI IN TERNARY COMPLEX WITH COFACTOR (NADP+) AND INHIBITOR (COMPOUND AX5) | OXIDOREDUCTASE                |
| 3BMR               | STRUCTURE OF PTERIDINE REDUCTASE 1 (PTR1) FROM TRYPANOSOMA BRUCEI IN TERNARY COMPLEX WITH COFACTOR (NADP+) AND INHIBITOR (COMPOUND AX6) | OXIDOREDUCTASE                |
| 3BN3               | CRYSTAL STRUCTURE OF ICAM-5 IN COMPLEX WITH AL I DOMAIN                                                                                 | CELL ADHESION, IMMUNE SYSTEM  |
| 3BN9               | CRYSTAL STRUCTURE OF MT-SP1 IN COMPLEX WITH FAB INHIBITOR E2                                                                            | HYDROLASE                     |
| 3BO0               | RIBOSOME-SECY COMPLEX                                                                                                                   | RIBOSOME                      |
| 3BO1               | RIBOSOME-SECY COMPLEX                                                                                                                   | RIBOSOME                      |
| 3BO8               | THE HIGH RESOLUTION CRYSTAL STRUCTURE OF HLA-A1 COMPLEXED WITH THE MAGE-A1 PEPTIDE                                                      | IMMUNE SYSTEM                 |
| 3BOM               | CRYSTAL STRUCTURE OF TROUT HEMOGLOBIN AT 1.35 ANGSTROM RESOLUTION                                                                       | OXYGEN STORAGE/TRANSPORT      |
| 3BOO               | STRUCTURE OF THE C. BOTULINUM NEUROTOXIN SEROTYPE A WITH AN INHIBITORY PEPTIDE BOUND                                                    | TOXIN/TOXIN INHIBITOR         |
| 3BOW               | STRUCTURE OF M-CALPAIN IN COMPLEX WITH CALPASTATIN                                                                                      | HYDROLASE/HYDROLASE INHIBITOR |
| 3BP4               | THE HIGH RESOLUTION CRYSTAL STRUCTURE OF HLA-B*2705 IN COMPLEX WITH A CATHEPSIN A SIGNAL SEQUENCE PEPTIDE PCATA                         | IMMUNE SYSTEM                 |
| 3BP7               | THE HIGH RESOLUTION CRYSTAL STRUCTURE OF HLA-B*2709 IN                                                                                  | IMMUNE SYSTEM                 |

|      |                                                                                                                                                                                                |                                       |
|------|------------------------------------------------------------------------------------------------------------------------------------------------------------------------------------------------|---------------------------------------|
|      | COMPLEX WITH A CATHEPSIN A SIGNAL SEQUENCE PEPTIDE, PCATA                                                                                                                                      | TRANSCRIPTION                         |
| 3BP8 | CRYSTAL STRUCTURE OF MLC/EIIB COMPLEX                                                                                                                                                          | CYTOKINE/CYTOKINE RECEPTOR            |
| 3BPL | CRYSTAL STRUCTURE OF THE IL4-IL4R-COMMON GAMMA TERNARY COMPLEX                                                                                                                                 | CYTOKINE/CYTOKINE RECEPTOR            |
| 3BPN | CRYSTAL STRUCTURE OF THE IL4-IL4R-IL13RA TERNARY COMPLEX                                                                                                                                       | CYTOKINE/CYTOKINE RECEPTOR            |
| 3BPO | CRYSTAL STRUCTURE OF THE IL13-IL4R-IL13RA TERNARY COMPLEX                                                                                                                                      | TOXIN                                 |
| 3BPQ | CRYSTAL STRUCTURE OF RELB-RELE ANTITOXIN-TOXIN COMPLEX FROM METHANOCOCCUS JANNASCHII                                                                                                           | HYDROLASE/LIPID TRANSPORT             |
| 3BPS | PCSK9:EGF-A COMPLEX                                                                                                                                                                            | PROTEIN BINDING                       |
| 3BQD | DOUBLING THE SIZE OF THE GLUCOCORTICOID RECEPTOR LIGAND BINDING POCKET BY DEACYLCORTIVAZOL                                                                                                     | DNA BINDING PROTEIN                   |
| 3BQO | CRYSTAL STRUCTURE OF TRF1 TRFH DOMAIN AND TIN2 PEPTIDE COMPLEX                                                                                                                                 | IMMUNE SYSTEM                         |
| 3BQU | CRYSTAL STRUCTURE OF THE 2F5 FAB'-3H6 FAB COMPLEX                                                                                                                                              | HORMONE                               |
| 3BRR | CRYSTAL STRUCTURE OF INSULIN IN COMPLEX WITH SULFATIDE                                                                                                                                         | TRANSFERASE/TRANSCRIPTION             |
| 3BRT | NEMO/IKK ASSOCIATION DOMAIN STRUCTURE                                                                                                                                                          | TRANSFERASE/TRANSCRIPTION             |
| 3BRV | NEMO/IKKB ASSOCIATION DOMAIN STRUCTURE                                                                                                                                                         | GTP BINDING PROTEIN                   |
| 3BRW | STRUCTURE OF THE RAP-RAPGAP COMPLEX                                                                                                                                                            | STRUCTURAL GENOMICS, UNKNOWN FUNCTION |
| 3BS4 | CRYSTAL STRUCTURE OF UNCHARACTERIZED PROTEIN PH0321 FROM PYROCOCCUS HORIKOSHII IN COMPLEX WITH AN UNKNOWN PEPTIDE                                                                              | SIGNALING PROTEIN/MEMBRANE PROTEIN    |
| 3BS5 | CRYSTAL STRUCTURE OF HCNK2-SAM/DHYP-SAM COMPLEX                                                                                                                                                | TRANSPORT PROTEIN/IMMUNE SYSTEM       |
| 3BSZ | CRYSTAL STRUCTURE OF THE TRANSTHYRETIN-RETINOL BINDING PROTEIN-FAB COMPLEX                                                                                                                     | IMMUNE SYSTEM                         |
| 3BT1 | STRUCTURE OF UROKINASE RECEPTOR, UROKINASE AND VITRONECTIN COMPLEX                                                                                                                             | IMMUNE SYSTEM                         |
| 3BT2 | STRUCTURE OF UROKINASE RECEPTOR, UROKINASE AND VITRONECTIN COMPLEX                                                                                                                             | VIRAL PROTEIN                         |
| 3BT6 | CRYSTAL STRUCTURE OF INFLUENZA B VIRUS HEMAGGLUTININ                                                                                                                                           | DNA BINDING PROTEIN, CHAPERONE        |
| 3BTP | CRYSTAL STRUCTURE OF AGROBACTERIUM TUMEFACIENS VIRE2 IN COMPLEX WITH ITS CHAPERONE VIRE1: A NOVEL FOLD AND IMPLICATIONS FOR DNA BINDING                                                        | TRANSCRIPTION                         |
| 3BTS | CRYSTAL STRUCTURE OF A TERNARY COMPLEX OF THE TRANSCRIPTIONAL REPRESSOR GAL80P (GAL80S0 [G301R]) AND THE ACIDIC ACTIVATION DOMAIN OF GAL4P (AA 854-874) FROM SACCHAROMYCES CEREVISIAE WITH NAD | TRANSFERASE                           |
| 3BU3 | CRYSTAL STRUCTURE OF THE INSULIN RECEPTOR KINASE IN COMPLEX WITH IRS2 KRLB PEPTIDE                                                                                                             | TRANSFERASE                           |
| 3BU5 | CRYSTAL STRUCTURE OF THE INSULIN RECEPTOR KINASE IN COMPLEX WITH IRS2 KRLB PEPTIDE AND ATP                                                                                                     | TRANSFERASE                           |
| 3BU6 | CRYSTAL STRUCTURE OF THE INSULIN RECEPTOR KINASE IN COMPLEX WITH IRS2 KRLB PHOSPHOPEPTIDE                                                                                                      | TRANSFERASE                           |



|      |                                                                                                                                                 |                                         |
|------|-------------------------------------------------------------------------------------------------------------------------------------------------|-----------------------------------------|
| 3BU8 | CRYSTAL STRUCTURE OF TRF2 TRFH DOMAIN AND TIN2 PEPTIDE COMPLEX                                                                                  | DNA BINDING PROTEIN                     |
| 3BUA | CRYSTAL STRUCTURE OF TRF2 TRFH DOMAIN AND APOLLO PEPTIDE COMPLEX                                                                                | DNA BINDING PROTEIN                     |
| 3BUM | CRYSTAL STRUCTURE OF C-CBL-TKB DOMAIN COMPLEXED WITH ITS BINDING MOTIF IN SPROUTY2                                                              | LIGASE                                  |
| 3BUN | CRYSTAL STRUCTURE OF C-CBL-TKB DOMAIN COMPLEXED WITH ITS BINDING MOTIF IN SPROUTY4                                                              | LIGASE/SIGNALING PROTEIN                |
| 3BUO | CRYSTAL STRUCTURE OF C-CBL-TKB DOMAIN COMPLEXED WITH ITS BINDING MOTIF IN EGF RECEPTOR'                                                         | LIGASE/SIGNALING PROTEIN                |
| 3BUW | CRYSTAL STRUCTURE OF C-CBL-TKB DOMAIN COMPLEXED WITH ITS BINDING MOTIF IN SYK                                                                   | LIGASE/SIGNALING PROTEIN                |
| 3BUX | CRYSTAL STRUCTURE OF C-CBL-TKB DOMAIN COMPLEXED WITH ITS BINDING MOTIF IN C-MET                                                                 | LIGASE/SIGNALING PROTEIN                |
| 3BUY | MHC-I IN COMPLEX WITH PEPTIDE                                                                                                                   | IMMUNE SYSTEM                           |
| 3BUZ | CRYSTAL STRUCTURE OF IA-BTAD-ACTIN COMPLEX                                                                                                      | TOXIN/STRUCTURAL PROTEIN                |
| 3BV9 | STRUCTURE OF THROMBIN BOUND TO THE INHIBITOR FM19                                                                                               | HYDROLASE                               |
| 3BVD | STRUCTURE OF SURFACE-ENGINEERED CYTOCHROME BA3 OXIDASE FROM THERMUS THERMOPHILUS UNDER XENON PRESSURE, 100PSI 5MIN                              | OXIDOREDUCTASE                          |
| 3BVH | CRYSTAL STRUCTURE OF RECOMBINANT GAMMAD364A FIBRINOGEN FRAGMENT D WITH THE PEPTIDE LIGAND GLY-PRO-ARG-PRO-AMIDE                                 | BLOOD CLOTTING                          |
| 3BW9 | CRYSTAL STRUCTURE OF HLA B*3508 IN COMPLEX WITH A HCMV 12-MER PEPTIDE FROM THE PP65 PROTEIN                                                     | IMMUNE SYSTEM                           |
| 3BWA | CRYSTAL STRUCTURE OF HLA B*3508 IN COMPLEX WITH A HCMV 8-MER PEPTIDE FROM THE PP65 PROTEIN                                                      | IMMUNE SYSTEM                           |
| 3BWN | L-TRYPTOPHAN AMINOTRANSFERASE                                                                                                                   | TRANSFERASE                             |
| 3BWU | CRYSTAL STRUCTURE OF THE TERNARY COMPLEX OF FIMD (N-TERMINAL DOMAIN, FIMDN) WITH FIMC AND THE N-TERMINALLY TRUNCATED PILUS SUBUNIT FIMF (FIMFT) | CHAPERONE, STRUCTURAL, MEMBRANE PROTEIN |
| 3BX1 | COMPLEX BETWEEN THE BARLEY ALPHA-AMYLASE/SUBTILISIN INHIBITOR AND THE SUBTILISIN SAVINASE                                                       | HYDROLASE/HYDROLASE INHIBITOR           |
| 3BX4 | CRYSTAL STRUCTURE OF THE SNAKE VENOM TOXIN AGGRETIN                                                                                             | TOXIN                                   |
| 3BXK | CRYSTAL STRUCTURE OF THE P/Q-TYPE CALCIUM CHANNEL (CAV2.1) IQ DOMAIN AND CA2+CALMODULIN COMPLEX                                                 | MEMBRANE PROTEIN, SIGNALING PROTEIN     |
| 3BXL | CRYSTAL STRUCTURE OF THE R-TYPE CALCIUM CHANNEL (CAV2.3) IQ DOMAIN AND CA2+CALMODULIN COMPLEX                                                   | MEMBRANE PROTEIN, SIGNALING PROTEIN     |
| 3BXQ | THE STRUCTURE OF A MUTANT INSULIN UNCOUPLES RECEPTOR BINDING FROM PROTEIN ALLOSTERY. AN ELECTROSTATIC BLOCK TO THE TR TRANSITION                | HORMONE                                 |
| 3BY4 | STRUCTURE OF OVARIAN TUMOR (OTU) DOMAIN IN COMPLEX WITH UBIQUITIN                                                                               | CELL CYCLE, HYDROLASE                   |
| 3BYH | MODEL OF ACTIN-FIMBRIN ABD2 COMPLEX                                                                                                             | STRUCTURAL PROTEIN                      |

|      |                                                                                                                           |                                     |
|------|---------------------------------------------------------------------------------------------------------------------------|-------------------------------------|
| 3BZ4 | CRYSTAL STRUCTURE OF FAB F22-4 IN COMPLEX WITH A SHIGELLA FLEXNERI 2A O-AG DECASACCHARIDE                                 | IMMUNE SYSTEM                       |
| 3BZE | THE HUMAN NON-CLASSICAL MAJOR HISTOCOMPATIBILITY COMPLEX MOLECULE HLA-E                                                   | IMMUNE SYSTEM                       |
| 3BZF | THE HUMAN NON-CLASSICAL MAJOR HISTOCOMPATIBILITY COMPLEX MOLECULE HLA-E                                                   | IMMUNE SYSTEM                       |
| 3BZI | MOLECULAR AND STRUCTURAL BASIS OF POLO-LIKE KINASE 1 SUBSTRATE RECOGNITION: IMPLICATIONS IN CENTROSOMAL LOCALIZATION      | TRANSFERASE                         |
| 3BZL | CRYSTAL STRUCTURAL OF NATIVE ESCU C-TERMINAL DOMAIN                                                                       | MEMBRANE PROTEIN, PROTEIN TRANSPORT |
| 3BZO | CRYSTAL STRUCTURAL OF NATIVE ESCU C-TERMINAL DOMAIN                                                                       | MEMBRANE PROTEIN, PROTEIN TRANSPORT |
| 3BZV | CRYSTAL STRUCTURAL OF THE MUTATED T264A ESCU C-TERMINAL DOMAIN                                                            | MEMBRANE PROTEIN, PROTEIN TRANSPORT |
| 3BZX | CRYSTAL STRUCTURE OF THE MUTATED H265A ESCU C-TERMINAL DOMAIN                                                             | MEMBRANE PROTEIN, PROTEIN TRANSPORT |
| 3BZY | CRYSTAL STRUCTURE OF THE MUTATED Y316D ESCU C-TERMINAL DOMAIN                                                             | MEMBRANE PROTEIN, PROTEIN TRANSPORT |
| 3BZZ | CRYSTAL STRUCTURAL OF THE MUTATED R313T ESCU/SPAS C-TERMINAL DOMAIN                                                       | MEMBRANE PROTEIN, PROTEIN TRANSPORT |
| 3C00 | CRYSTAL STRUCTURAL OF THE MUTATED G247T ESCU/SPAS C-TERMINAL DOMAIN                                                       | MEMBRANE PROTEIN, PROTEIN TRANSPORT |
| 3C01 | CRYSTAL STRUCTURAL OF NATIVE SPAS C-TERMINAL DOMAIN                                                                       | MEMBRANE PROTEIN, PROTEIN TRANSPORT |
| 3C03 | CRYSTAL STRUCTURE OF THE ESCU C-TERMINAL DOMAIN WITH P263A MUTATION,SPACE GROUP P 1 21 1                                  | MEMBRANE PROTEIN, PROTEIN TRANSPORT |
| 3C08 | CRYSTAL STRUCTURE THE FAB FRAGMENT OF MATUZUMAB/EMD72000 (FAB72000)                                                       | IMMUNE SYSTEM                       |
| 3C09 | CRYSTAL STRUCTURE THE FAB FRAGMENT OF MATUZUMAB (FAB72000) IN COMPLEX WITH DOMAIN III OF THE EXTRACELLULAR REGION OF EGFR | IMMUNE SYSTEM/TRANSFERASE           |
| 3C0R | STRUCTURE OF OVARIAN TUMOR (OTU) DOMAIN IN COMPLEX WITH UBIQUITIN                                                         | CELL CYCLE, HYDROLASE               |
| 3C0T | STRUCTURE OF THE SCHIZOSACCHAROMYCES POMBE MEDIATOR SUBCOMPLEX MED8C/18                                                   | TRANSCRIPTION                       |
| 3C1B | THE EFFECT OF H3 K79 DIMETHYLATION AND H4 K20 TRIMETHYLATION ON NUCLEOSOME AND CHROMATIN STRUCTURE                        | STRUCTURAL PROTEIN/DNA              |
| 3C1C | THE EFFECT OF H3 K79 DIMETHYLATION AND H4 K20 TRIMETHYLATION ON NUCLEOSOME AND CHROMATIN STRUCTURE                        | STRUCTURAL PROTEIN/DNA              |
| 3C2A | ANTIBODY FAB FRAGMENT 447-52D IN COMPLEX WITH UG1033 PEPTIDE                                                              | IMMUNE SYSTEM                       |
| 3C2G | CRYSTAL COMPLEX OF SYS-1/POP-1 AT 2.5A RESOLUTION                                                                         | CELL ADHESION/TRANSCRIPTION         |
| 3C30 | ALIX BRO1-DOMAIN:CHMIP4A CO-CRYSTAL STRUCTURE                                                                             | TRANSPORT PROTEIN                   |
| 3C3Q | ALIX BRO1-DOMAIN:CHMIP4B CO-CRYSTAL STRUCTURE                                                                             | TRANSPORT PROTEIN                   |

|      |                                                                                                                           |                                     |
|------|---------------------------------------------------------------------------------------------------------------------------|-------------------------------------|
| 3C3R | ALIX BRO1 CHMP4C COMPLEX                                                                                                  | MEMBRANE PROTEIN                    |
| 3C4M | STRUCTURE OF HUMAN PARATHYROID HORMONE IN COMPLEX WITH THE EXTRACELLULAR DOMAIN OF ITS G-PROTEIN-COUPLED RECEPTOR (PTH1R) | HYDROLASE/HYDROLASE INHIBITOR       |
| 3C4O | CRYSTAL STRUCTURE OF THE SHV-1 BETA-LACTAMASE/BETA-LACTAMASE INHIBITOR PROTEIN (BLIP) E73M/S130K/S146M COMPLEX            | HYDROLASE/HYDROLASE INHIBITOR       |
| 3C4P | CRYSTAL STRUCTURE OF THE SHV-1 BETA-LACTAMASE/BETA-LACTAMASE INHIBITOR PROTEIN (BLIP) E73M COMPLEX                        | SIGNALING PROTEIN/SIGNALING PROTEIN |
| 3C59 | CRYSTAL STRUCTURE OF THE LIGAND-BOUND GLUCAGON-LIKE PEPTIDE-1 RECEPTOR EXTRACELLULAR DOMAIN                               | TRANSFERASE                         |
| 3C5I | CRYSTAL STRUCTURE OF PLASMODIUM KNOWLESI CHOLINE KINASE, PKH_134520                                                       | MEMBRANE PROTEIN                    |
| 3C5J | CRYSTAL STRUCTURE OF HLA DR52C                                                                                            | IMMUNE SYSTEM                       |
| 3C5S | CRYSTAL STRUCTURE OF MONOCLONAL FAB F22-4 SPECIFIC FOR SHIGELLA FLEXNERI 2A O-AG                                          | SIGNALING PROTEIN/SIGNALING PROTEIN |
| 3C5T | CRYSTAL STRUCTURE OF THE LIGAND-BOUND GLUCAGON-LIKE PEPTIDE-1 RECEPTOR EXTRACELLULAR DOMAIN                               | HYDROLASE                           |
| 3C5W | COMPLEX BETWEEN PP2A-SPECIFIC METHYLESTERASE PME-1 AND PP2A CORE ENZYME                                                   | VIRAL PROTEIN                       |
| 3C5X | CRYSTAL STRUCTURE OF THE PRECURSOR MEMBRANE PROTEIN-ENVELOPE PROTEIN HETERODIMER FROM THE DENGUE 2 VIRUS AT LOW PH        | SUGAR BINDING PROTEIN/IMMUNE SYSTEM |
| 3C5Z | CRYSTAL STRUCTURE OF MOUSE MHC CLASS II I-AB/3K PEPTIDE COMPLEXED WITH MOUSE TCR B3K506                                   | SUGAR BINDING PROTEIN/IMMUNE SYSTEM |
| 3C60 | CRYSTAL STRUCTURE OF MOUSE MHC CLASS II I-AB/3K PEPTIDE COMPLEXED WITH MOUSE TCR YAE62                                    | TRANSFERASE                         |
| 3C66 | YEAST POLY(A) POLYMERASE IN COMPLEX WITH FIP1 RESIDUES 80-105                                                             | SUGAR BINDING PROTEIN/IMMUNE SYSTEM |
| 3C6L | CRYSTAL STRUCTURE OF MOUSE MHC CLASS II I-AB/3K PEPTIDE COMPLEXED WITH MOUSE TCR 2W20                                     | SIGNALING PROTEIN                   |
| 3C6N | SMALL MOLECULE AGONISTS AND ANTAGONISTS OF F-BOX PROTEIN-SUBSTRATE INTERACTIONS IN AUXIN PERCEPTION AND SIGNALING         | SIGNALING PROTEIN                   |
| 3C6O | SMALL MOLECULE AGONISTS AND ANTAGONISTS OF F-BOX PROTEIN-SUBSTRATE INTERACTIONS IN AUXIN PERCEPTION AND SIGNALING         | SIGNALING PROTEIN                   |
| 3C6P | SMALL MOLECULE AGONISTS AND ANTAGONISTS OF F-BOX PROTEIN-SUBSTRATE INTERACTIONS IN AUXIN PERCEPTION AND SIGNALING         | IMMUNE SYSTEM                       |
| 3C6S | CRYSTAL STRUCTURE OF FAB F22-4 IN COMPLEX WITH A SHIGELLA FLEXNERI 2A O-AG PENTADECASACCHARIDE                            | TRANSFERASE                         |
| 3C6T | CRYSTAL STRUCTURE OF HIV REVERSE TRANSCRIPTASE IN COMPLEX WITH INHIBITOR 14                                               | TRANSFERASE                         |
| 3C6U | CRYSTAL STRUCTURE OF HIV REVERSE TRANSCRIPTASE IN COMPLEX WITH INHIBITOR 22                                               | TRANSFERASE                         |
| 3C72 | ENGINEERED RABGGTASE IN COMPLEX WITH A PEPTIDOMIMETIC INHIBITOR                                                           | TRANSFERASE                         |

|      |                                                                                                                                          |                                       |
|------|------------------------------------------------------------------------------------------------------------------------------------------|---------------------------------------|
| 3C7B | STRUCTURE OF THE DISSIMILATORY SULFITE REDUCTASE FROM ARCHAEoglobus fulgidus                                                             | OXIDOREDUCTASE                        |
| 3C7K | MOLECULAR ARCHITECTURE OF GALPHAO AND THE STRUCTURAL BASIS FOR RGS16-MEDIATED DEACTIVATION                                               | SIGNALING PROTEIN                     |
| 3C7N | STRUCTURE OF THE HSP110:HSC70 NUCLEOTIDE EXCHANGE COMPLEX                                                                                | CHAPERONE/CHAPERONE                   |
| 3C7U | STRUCTURAL INSIGHT INTO THE KINETICS AND CP OF INTERACTIONS BETWEEN TEM-1-LACTAMASE AND BLIP                                             | HYDROLASE/HYDROLASE INHIBITOR         |
| 3C7V | STRUCTURAL INSIGHT INTO THE KINETICS AND DELTA-CP OF INTERACTIONS BETWEEN TEM-1 BETA-LACTAMASE AND BLIP                                  | HYDROLASE/HYDROLASE INHIBITOR         |
| 3C88 | CRYSTAL STRUCTURE OF THE CATALYTIC DOMAIN OF BOTULINUM NEUROTOXIN SEROTYPE A WITH INHIBITORY PEPTIDE RRG C                               | HYDROLASE                             |
| 3C89 | CRYSTAL STRUCTURE OF THE CATALYTIC DOMAIN OF BOTULINUM NEUROTOXIN SEROTYPE A WITH INHIBITORY PEPTIDE RRG M                               | HYDROLASE                             |
| 3C8A | CRYSTAL STRUCTURE OF THE CATALYTIC DOMAIN OF BOTULINUM NEUROTOXIN SEROTYPE A WITH INHIBITORY PEPTIDE RRG L                               | HYDROLASE                             |
| 3C8B | CRYSTAL STRUCTURE OF THE CATALYTIC DOMAIN OF BOTULINUM NEUROTOXIN SEROTYPE A WITH INHIBITORY PEPTIDE RRG I                               | HYDROLASE                             |
| 3C8G | CRYSTAL STRUCTURE OF A POSSIBLE TRANSCRIPTIONAL REGULATOR YGGD FROM SHIGELLA FLEXNERI 2A STR. 2457T                                      | TRANSCRIPTION REGULATOR               |
| 3C8K | THE CRYSTAL STRUCTURE OF LY49C BOUND TO H-2KB                                                                                            | IMMUNE SYSTEM                         |
| 3C91 | THERMOPLASMA ACIDOPHILUM 20S PROTEASOME WITH AN OPEN GATE                                                                                | HYDROLASE                             |
| 3C92 | THERMOPLASMA ACIDOPHILUM 20S PROTEASOME WITH A CLOSED GATE                                                                               | HYDROLASE                             |
| 3C94 | EXO1/SSB-CT COMPLEX                                                                                                                      | HYDROLASE                             |
| 3C98 | REVISED STRUCTURE OF THE MUNC18A-SYNTAXIN1 COMPLEX                                                                                       | ENDOCYTOSIS/EXOCYTOSIS                |
| 3C9A | HIGH RESOLUTION CRYSTAL STRUCTURE OF ARGOS BOUND TO THE EGF DOMAIN OF SPITZ                                                              | HORMONE/SIGNALING PROTEIN             |
| 3C9C | STRUCTURAL BASIS OF HISTONE H4 RECOGNITION BY P55                                                                                        | TRANSCRIPTION REPRESSOR               |
| 3C9N | CRYSTAL STRUCTURE OF A SARS CORONA VIRUS DERIVED PEPTIDE BOUND TO THE HUMAN MAJOR HISTOCOMPATIBILITY COMPLEX CLASS I MOLECULE HLA-B*1501 | IMMUNE SYSTEM                         |
| 3C9Q | CRYSTAL STRUCTURE OF THE UNCHARACTERIZED HUMAN PROTEIN C8ORF32 WITH BOUND PEPTIDE                                                        | STRUCTURAL GENOMICS, UNKNOWN FUNCTION |
| 3CAA | CLEAVED ANTICHYMOTRYPSIN A347R                                                                                                           | SERPIN                                |
| 3CB8 | 4FE-4S-PYRUVATE FORMATE-LYASE ACTIVATING ENZYME IN COMPLEX WITH ADOMET AND A PEPTIDE SUBSTRATE                                           | OXIDOREDUCTASE                        |
| 3CBJ | CHAGASIN-CATHEPSIN B COMPLEX                                                                                                             | HYDROLASE/HYDROLASE INHIBITOR         |
| 3CBK | CHAGASIN-CATHEPSIN B                                                                                                                     | HYDROLASE/HYDROLASE INHIBITOR         |
| 3CBL | CRYSTAL STRUCTURE OF HUMAN FELINE SARCOMA VIRAL ONCOGENE HOMOLOGUE (V-FES) IN COMPLEX WITH STAUROSPORINE AND A CONSENSUS PEPTIDE         | TRANSFERASE                           |
|      |                                                                                                                                          | TRANSFERASE/TRANSFERASE RECEPTOR      |

|      |                                                                                                                                                                                               |                                  |
|------|-----------------------------------------------------------------------------------------------------------------------------------------------------------------------------------------------|----------------------------------|
| 3CBM | SET7/9-ER-ADOMET COMPLEX                                                                                                                                                                      | TRANSFERASE/TRANSFERASE RECEPTOR |
| 3CBO | SET7/9-ER-ADOHCY COMPLEX                                                                                                                                                                      | TRANSFERASE/TRANSFERASE RECEPTOR |
| 3CBP | SET7/9-ER-SINEFUNGIN COMPLEX                                                                                                                                                                  | RIBOSOME                         |
| 3CC2 | THE REFINED CRYSTAL STRUCTURE OF THE HALOARCUA MARISMORTUI LARGE RIBOSOMAL SUBUNIT AT 2.4 ANGSTROM RESOLUTION WITH RRNA SEQUENCE FOR THE 23S RRNA AND GENOME-DERIVED SEQUENCES FOR R-PROTEINS | RIBOSOME                         |
| 3CC4 | CO-CRYSTAL STRUCTURE OF ANISOMYCIN BOUND TO THE 50S RIBOSOMAL SUBUNIT                                                                                                                         | RIBOSOME                         |
| 3CC7 | STRUCTURE OF ANISOMYCIN RESISTANT 50S RIBOSOMAL SUBUNIT: 23S RRNA MUTATION C2487U                                                                                                             | RIBOSOME                         |
| 3CCE | STRUCTURE OF ANISOMYCIN RESISTANT 50S RIBOSOMAL SUBUNIT: 23S RRNA MUTATION U2535A                                                                                                             | RIBOSOME                         |
| 3CCJ | STRUCTURE OF ANISOMYCIN RESISTANT 50S RIBOSOMAL SUBUNIT: 23S RRNA MUTATION C2534U                                                                                                             | RIBOSOME                         |
| 3CCL | STRUCTURE OF ANISOMYCIN RESISTANT 50S RIBOSOMAL SUBUNIT: 23S RRNA MUTATION U2535C. DENSITY FOR ANISOMYCIN IS VISIBLE BUT NOT INCLUDED IN MODEL.                                               | RIBOSOME                         |
| 3CCM | STRUCTURE OF ANISOMYCIN RESISTANT 50S RIBOSOMAL SUBUNIT: 23S RRNA MUTATION G2611U                                                                                                             | RIBOSOME                         |
| 3CCQ | STRUCTURE OF ANISOMYCIN RESISTANT 50S RIBOSOMAL SUBUNIT: 23S RRNA MUTATION A2488U                                                                                                             | RIBOSOME                         |
| 3CCR | STRUCTURE OF ANISOMYCIN RESISTANT 50S RIBOSOMAL SUBUNIT: 23S RRNA MUTATION A2488C. DENSITY FOR ANISOMYCIN IS VISIBLE BUT NOT INCLUDED IN THE MODEL.                                           | RIBOSOME                         |
| 3CCS | STRUCTURE OF ANISOMYCIN RESISTANT 50S RIBOSOMAL SUBUNIT: 23S RRNA MUTATION G2482A                                                                                                             | RIBOSOME                         |
| 3CCU | STRUCTURE OF ANISOMYCIN RESISTANT 50S RIBOSOMAL SUBUNIT: 23S RRNA MUTATION G2482C                                                                                                             | RIBOSOME                         |
| 3CCV | STRUCTURE OF ANISOMYCIN RESISTANT 50S RIBOSOMAL SUBUNIT: 23S RRNA MUTATION G2616A                                                                                                             | RIBOSOME                         |
| 3CD3 | CRYSTAL STRUCTURE OF PHOSPHORYLATED HUMAN FELINE SARCOMA VIRAL ONCOGENE HOMOLOGUE (V-FES) IN COMPLEX WITH STAUROSPORINE AND A CONSENSUS PEPTIDE                                               | TRANSFERASE                      |
| 3CD6 | CO-CRYSTAL OF LARGE RIBOSOMAL SUBUNIT MUTANT G2616A WITH CC-PUROMYCIN                                                                                                                         | RIBOSOME                         |
| 3CDG | HUMAN CD94/NKG2A IN COMPLEX WITH HLA-E                                                                                                                                                        | IMMUNE SYSTEM                    |
| 3CDK | CRYSTAL STRUCTURE OF THE CO-EXPRESSED SUCCINYL-COA TRANSFERASE A AND B COMPLEX FROM BACILLUS SUBTILIS                                                                                         | TRANSFERASE                      |
| 3CDW | CRYSTAL STRUCTURE OF COXSACKIEVIRUS B3 RNA-DEPENDENT RNA POLYMERASE (3DPOL) IN COMPLEX WITH PROTEIN PRIMER VPG AND A PYROPHOSPHATE                                                            | TRANSFERASE/VIRAL PROTEIN        |
| 3CDZ | CRYSTAL STRUCTURE OF HUMAN FACTOR VIII                                                                                                                                                        | BLOOD CLOTTING                   |
| 3CEN | FACTOR XA IN COMPLEX WITH THE INHIBITOR N-(2-((5-CHLORO-2-                                                                                                                                    | HYDROLASE                        |

|      | PYRIDINYL) AMINO)SULFONYL)PHENYL)-4-(2-OXO-1(2H)-<br>PYRIDINYL)BENZAMIDE                                                                     |                                       |
|------|----------------------------------------------------------------------------------------------------------------------------------------------|---------------------------------------|
| 3CEP | STRUCTURE OF A TRYPTOPHAN SYNTHASE QUINONOID INTERMEDIATE                                                                                    | LYASE                                 |
| 3CF4 | STRUCTURE OF THE CODH COMPONENT OF THE M. BARKERI ACDS<br>COMPLEX                                                                            | OXIDOREDUCTASE                        |
| 3CF5 | THIOPEPTIDE ANTIBIOTIC THIOSTREPTON BOUND TO THE LARGE<br>RIBOSOMAL SUBUNIT OF DEINOCOCCUS RADIODURANS                                       | RIBOSOME                              |
| 3CF6 | STRUCTURE OF EPAC2 IN COMPLEX WITH CYCLIC-AMP AND RAP                                                                                        | SIGNALING PROTEIN/GTP-BINDING PROTEIN |
| 3CFB | HIGH-RESOLUTION STRUCTURE OF BLUE FLUORESCENT ANTIBODY EP2-<br>19G2 IN COMPLEX WITH STILBENE HAPTEN AT 100K                                  | IMMUNE SYSTEM                         |
| 3CFC | HIGH-RESOLUTION STRUCTURE OF BLUE FLUORESCENT ANTIBODY EP2-<br>19G2                                                                          | IMMUNE SYSTEM                         |
| 3CFD | PURPLE-FLUORESCENT ANTIBODY EP2-25C10 IN COMPLEX WITH ITS<br>STILBENE HAPTEN                                                                 | IMMUNE SYSTEM                         |
| 3CFE | CRYSTAL STRUCTURE OF PURPLE-FLUORESCENT ANTIBODY EP2-25C10                                                                                   | IMMUNE SYSTEM                         |
| 3CFJ | CRYSTAL STRUCTURE OF CATALYTIC ELIMINATION ANTIBODY 34E4,<br>ORTHORHOMBIC CRYSTAL FORM                                                       | IMMUNE SYSTEM                         |
| 3CFK | CRYSTAL STRUCTURE OF CATALYTIC ELIMINATION ANTIBODY 34E4,<br>TRICLINIC CRYSTAL FORM                                                          | IMMUNE SYSTEM                         |
| 3CFS | STRUCTURAL BASIS OF THE INTERACTION OF RBAP46/RBAP48 WITH<br>HISTONE H4                                                                      | HISTONE/CHAPERONE                     |
| 3CFV | STRUCTURAL BASIS OF THE INTERACTION OF RBAP46/RBAP48 WITH<br>HISTONE H4                                                                      | HISTONE/CHAPERONE                     |
| 3CH5 | THE CRYSTAL STRUCTURE OF THE RANGDP-NUP153ZNF2 COMPLEX                                                                                       | TRANSPORT PROTEIN                     |
| 3CHW | COMPLEX OF DICTYOSTELIUM DISCOIDEUM ACTIN WITH PROFILIN AND<br>THE LAST POLY-PRO OF HUMAN VASP                                               | STRUCTURAL PROTEIN                    |
| 3CHX | CRYSTAL STRUCTURE OF METHYLOSINUS TRICHOSPORIUM OB3B<br>PARTICULATE METHANE MONOOXYGENASE (PMMO)                                             | MEMBRANE PROTEIN                      |
| 3CI0 | THE CRYSTAL STRUCTURE OF THE GSPK-GSPI-GSPJ COMPLEX FROM<br>ENTEROTOXIGENIC ESCHERICHIA COLI TYPE 2 SECRETION SYSTEM                         | PROTEIN TRANSPORT                     |
| 3CI5 | COMPLEX OF PHOSPHORYLATED DICTYOSTELIUM DISCOIDEUM ACTIN<br>WITH GELSOLIN                                                                    | STRUCTURAL PROTEIN                    |
| 3CII | STRUCTURE OF NKG2A/CD94 BOUND TO HLA-E                                                                                                       | IMMUNE SYSTEM                         |
| 3CIP | COMPLEX OF DICTYOSTELIUM DISCOIDEUM ACTIN WITH GELSOLIN                                                                                      | STRUCTURAL PROTEIN                    |
| 3CIR | E. COLI QUINOL FUMARATE REDUCTASE FRDA T234A MUTATION                                                                                        | OXIDOREDUCTASE                        |
| 3CIU | SITE-SELECTIVE GLYCOSYLATION OF CYSTEINE-93 BETA ON THE<br>SURFACE OF BOVINE HEMOGLOBIN AND ITS APPLICATION AS A<br>NOVEL OXYGEN THERAPEUTIC | OXYGEN BINDING                        |
| 3CJB | ACTIN DIMER CROSS-LINKED BY V. CHOLERAE MARTX TOXIN AND<br>COMPLEXED WITH GELSOLIN-SEGMENT 1                                                 | STRUCTURAL PROTEIN                    |
| 3CJC | ACTIN DIMER CROSS-LINKED BY V. CHOLERAE MARTX TOXIN AND<br>COMPLEXED WITH DNASE I AND GELSOLIN-SEGMENT 1                                     | STRUCTURAL PROTEIN/HYDROLASE          |

|      |                                                                                                                          |                                 |
|------|--------------------------------------------------------------------------------------------------------------------------|---------------------------------|
| 3CJH | TIM8-TIM13 COMPLEX                                                                                                       | PROTEIN TRANSPORT               |
| 3CJI | STRUCTURE OF SENECA VALLEY VIRUS-001                                                                                     | VIRUS                           |
| 3CJQ | RIBOSOMAL PROTEIN L11 METHYLTRANSFERASE (PRMA) IN COMPLEX WITH DIMETHYLATED RIBOSOMAL PROTEIN L11 IN SPACE GROUP P212121 | TRANSFERASE/RIBOSOMAL PROTEIN   |
| 3CJR | RIBOSOMAL PROTEIN L11 METHYLTRANSFERASE (PRMA) IN COMPLEX WITH RIBOSOMAL PROTEIN L11 (K39A) AND INHIBITOR SINEFUNGIN.    | TRANSFERASE/RIBOSOMAL PROTEIN   |
| 3CJS | MINIMAL RECOGNITION COMPLEX BETWEEN PRMA AND RIBOSOMAL PROTEIN L11                                                       | TRANSFERASE/RIBOSOMAL PROTEIN   |
| 3CJT | RIBOSOMAL PROTEIN L11 METHYLTRANSFERASE (PRMA) IN COMPLEX WITH DIMETHYLATED RIBOSOMAL PROTEIN L11                        | TRANSFERASE/RIBOSOMAL PROTEIN   |
| 3CK0 | ANTI-ANTI-IDIOTYPIC ANTIBODY AGAINST HUMAN ANGIOTENSIN II, COMPLEX WITH HUMAN ANGIOTENSIN II                             | IMMUNE SYSTEM                   |
| 3CK4 | A HETEROSPECIFIC LEUCINE ZIPPER TETRAMER                                                                                 | PROTEIN BINDING                 |
| 3CKI | CRYSTAL STRUCTURE OF THE TACE-N-TIMP-3 COMPLEX                                                                           | HYDROLASE, HYDROLASE INHIBITOR  |
| 3CL3 | CRYSTAL STRUCTURE OF A VFLIP-IKKGAMMA COMPLEX: INSIGHTS INTO VIRAL ACTIVATION OF THE IKK SIGNALOSOME                     | VIRAL PROTEIN/SIGNALING PROTEIN |
| 3CLD | LIGAND BINDING DOMAIN OF THE GLUCOCORTICOID RECEPTOR COMPLEXED WITH FLUTICAZONE FUROATE                                  | TRANSCRIPTION                   |
| 3CLE | HIV NEUTRALIZING MONOCLONAL ANTIBODY YZ23                                                                                | IMMUNE SYSTEM                   |
| 3CLF | HIV NEUTRALIZING MONOCLONAL ANTIBODY YZ23                                                                                | IMMUNE SYSTEM                   |
| 3CLR | CRYSTAL STRUCTURE OF THE R236A ETF MUTANT FROM M. METHYLOTROPHUS                                                         | ELECTRON TRANSPORT              |
| 3CLS | CRYSTAL STRUCTURE OF THE R236C MUTANT OF ETF FROM METHYLOPHILUS METHYLOTROPHUS                                           | ELECTRON TRANSPORT              |
| 3CLT | CRYSTAL STRUCTURE OF THE R236E MUTANT OF METHYLOPHILUS METHYLOTROPHUS ETF                                                | ELECTRON TRANSPORT              |
| 3CLU | CRYSTAL STRUCTURE OF THE R236K MUTANT FROM METHYLOPHILUS METHYLOTROPHUS ETF                                              | ELECTRON TRANSPORT              |
| 3CM8 | A RNA POLYMERASE SUBUNIT STRUCTURE FROM VIRUS                                                                            | RNA BINDING PROTEIN/TRANSFERASE |
| 3CMA | THE STRUCTURE OF CCA AND CCA-PHE-CAP-BIO BOUND TO THE LARGE RIBOSOMAL SUBUNIT OF HALOARCUA MARISMORTUI                   | RIBOSOME                        |
| 3CME | THE STRUCTURE OF CA AND CCA-PHE-CAP-BIO BOUND TO THE LARGE RIBOSOMAL SUBUNIT OF HALOARCUA MARISMORTUI                    | RIBOSOME                        |
| 3CMM | CRYSTAL STRUCTURE OF THE UBA1-UBIQUITIN COMPLEX                                                                          | LIGASE/PROTEIN BINDING          |
| 3CMO | HIV NEUTRALIZING MONOCLONAL ANTIBODY YZ18                                                                                | IMMUNE SYSTEM                   |
| 3CNQ | PROSUBTILISIN SUBSTRATE COMPLEX OF SUBTILISIN SUBT_BACAM                                                                 | HYDROLASE                       |
| 3CO0 | SUBSTRATE COMPLEX OF FLUORIDE-SENSITIVE ENGINEERED SUBTILISIN SUBT_BACAM                                                 | HYDROLASE                       |
| 3COJ | CRYSTAL STRUCTURE OF THE BRCT DOMAINS OF HUMAN BRCA1 IN                                                                  | ANTITUMOR PROTEIN/LIGASE        |

| COMPLEX WITH A PHOSPHORYLATED PEPTIDE FROM HUMAN ACETYL-COA CARBOXYLASE 1 |                                                                                                                                                                                    | HYDROLASE (C-TERMINAL PEPTIDASE) |
|---------------------------------------------------------------------------|------------------------------------------------------------------------------------------------------------------------------------------------------------------------------------|----------------------------------|
| 3CPA                                                                      | X-RAY CRYSTALLOGRAPHIC INVESTIGATION OF SUBSTRATE BINDING TO CARBOXYPEPTIDASE A AT SUBZERO TEMPERATURE                                                                             | PROTEIN TRANSPORT                |
| 3CPH                                                                      | CRYSTAL STRUCTURE OF SEC4 IN COMPLEX WITH RAB-GDI                                                                                                                                  | PROTEIN TRANSPORT                |
| 3CPJ                                                                      | CRYSTAL STRUCTURE OF YPT31 IN COMPLEX WITH YEAST RAB-GDI                                                                                                                           | IMMUNE SYSTEM                    |
| 3CPL                                                                      | CRYSTAL STRUCTURE OF H-2DB IN COMPLEX WITH A VARIANT M6A OF THE NP366 PEPTIDE FROM INFLUENZA A VIRUS                                                                               | PROTEIN BINDING                  |
| 3CPT                                                                      | MP1-P14 SCAFFOLDING COMPLEX                                                                                                                                                        | PROTEIN TRANSPORT                |
| 3CQC                                                                      | NUCLEOPORIN NUP107/NUP133 INTERACTION COMPLEX                                                                                                                                      | PROTEIN TRANSPORT                |
| 3CQG                                                                      | NUCLEOPORIN NUP107/NUP133 INTERACTION COMPLEX, DELTA FINGER MUTANT                                                                                                                 | TRANSFERASE                      |
| 3CQU                                                                      | CRYSTAL STRUCTURE OF AKT-1 COMPLEXED WITH SUBSTRATE PEPTIDE AND INHIBITOR                                                                                                          | TRANSFERASE                      |
| 3CQW                                                                      | CRYSTAL STRUCTURE OF AKT-1 COMPLEXED WITH SUBSTRATE PEPTIDE AND INHIBITOR                                                                                                          | CHAPERONE                        |
| 3CQX                                                                      | CHAPERONE COMPLEX                                                                                                                                                                  | TRANSCRIPTION                    |
| 3CQZ                                                                      | CRYSTAL STRUCTURE OF 10 SUBUNIT RNA POLYMERASE II IN COMPLEX WITH THE INHIBITOR ALPHA-AMANITIN                                                                                     | TRANSFERASE                      |
| 3CR3                                                                      | STRUCTURE OF A TRANSIENT COMPLEX BETWEEN DHA-KINASE SUBUNITS DHAM AND DHAL FROM LACTOCOCCUS LACTIS                                                                                 | TRANSFERASE                      |
| 3CRK                                                                      | CRYSTAL STRUCTURE OF THE PDHK2-L2 COMPLEX.                                                                                                                                         | TRANSFERASE                      |
| 3CRL                                                                      | CRYSTAL STRUCTURE OF THE PDHK2-L2 COMPLEX.                                                                                                                                         | PROTEIN BINDING                  |
| 3CRP                                                                      | A HETEROSPECIFIC LEUCINE ZIPPER TETRAMER                                                                                                                                           | HYDROLASE                        |
| 3CS7                                                                      | FACTOR XA IN COMPLEX WITH THE INHIBITOR 1-(4-METHOXYPHENYL)-6-(4-(1-(PYRROLIDIN-1-YLMETHYL)CYCLOPROPYL)PHENYL)-3-(TRIFLUOROMETHYL)-5,6-DIHYDRO-1H-PYRAZOLO[3,4-C]PYRIDIN-7(4H)-ONE | NUCLEAR PROTEIN                  |
| 3CS8                                                                      | STRUCTURAL AND BIOCHEMICAL BASIS FOR THE BINDING SELECTIVITY OF PPARG TO PGC-1A                                                                                                    | IMMUNE SYSTEM/VIRAL PROTEIN      |
| 3CSY                                                                      | CRYSTAL STRUCTURE OF THE TRIMERIC PREFUSION EBOLA VIRUS GLYCOPROTEIN IN COMPLEX WITH A NEUTRALIZING ANTIBODY FROM A HUMAN SURVIVOR                                                 | PROTEIN TRANSPORT                |
| 3CUE                                                                      | CRYSTAL STRUCTURE OF A TRAPP SUBASSEMBLY ACTIVATING THE RAB YPT1P                                                                                                                  | PROTEIN TRANSPORT                |
| 3CUQ                                                                      | INTEGRATED STRUCTURAL AND FUNCTIONAL MODEL OF THE HUMAN ESCRT-II COMPLEX                                                                                                           | OXIDOREDUCTASE                   |
| 3CUR                                                                      | STRUCTURE OF A DOUBLE METHIONINE MUTANT OF NI-FE HYDROGENASE                                                                                                                       | OXIDOREDUCTASE                   |
| 3CUS                                                                      | STRUCTURE OF A DOUBLE ILE/PHE MUTANT OF NI-FE HYDROGENASE REFINED AT 2.2 ANGSTROM RESOLUTION                                                                                       | TRANSPORT PROTEIN                |
| 3CV0                                                                      | STRUCTURE OF PEROXISOMAL TARGETING SIGNAL 1 (PTS1) BINDING DOMAIN OF TRYPANOSOMA BRUCEI PEROXIN 5 (TBPEX5) COMPLEXED                                                               |                                  |



|      |                                                                                                                                                                                                 |                   |
|------|-------------------------------------------------------------------------------------------------------------------------------------------------------------------------------------------------|-------------------|
|      | TO T. BRUCEI PHOSPHOGLUCOISOMERASE (PGI) PTS1 PEPTIDE                                                                                                                                           | IMMUNE SYSTEM     |
| 3CVH | HOW TCR-LIKE ANTIBODY RECOGNIZES MHC-BOUND PEPTIDE                                                                                                                                              | IMMUNE SYSTEM     |
| 3CVI | HOW TCR-LIKE ANTIBODY RECOGNIZES MHC-BOUND PEPTIDE                                                                                                                                              | TRANSPORT PROTEIN |
| 3CVL | STRUCTURE OF PEROXISOMAL TARGETING SIGNAL 1 (PTS1) BINDING DOMAIN OF TRYPANOSOMA BRUCEI PEROXIN 5 (TBPEX5) COMPLEXED TO T. BRUCEI PHOSPHOFRUCTOKINASE (PFK) PTS1 PEPTIDE                        | TRANSPORT PROTEIN |
| 3CVN | STRUCTURE OF PEROXISOMAL TARGETING SIGNAL 1 (PTS1) BINDING DOMAIN OF TRYPANOSOMA BRUCEI PEROXIN 5 (TBPEX5) COMPLEXED TO T. BRUCEI GLYCERALDEHYDE-3-PHOSPHATE DEHYDROGENASE (GAPDH) PTS1 PEPTIDE | TRANSPORT PROTEIN |
| 3CVP | STRUCTURE OF PEROXISOMAL TARGETING SIGNAL 1 (PTS1) BINDING DOMAIN OF TRYPANOSOMA BRUCEI PEROXIN 5 (TBPEX5) COMPLEXED TO PTS1 PEPTIDE (10-SKL)                                                   | TRANSPORT PROTEIN |
| 3CVQ | STRUCTURE OF PEROXISOMAL TARGETING SIGNAL 1 (PTS1) BINDING DOMAIN OF TRYPANOSOMA BRUCEI PEROXIN 5 (TBPEX5) COMPLEXED TO PTS1 PEPTIDE (7-SKL)                                                    | OXIDOREDUCTASE    |
| 3CWB | CHICKEN CYTOCHROME BC1 COMPLEX INHIBITED BY AN IODINATED ANALOGUE OF THE POLYKETIDE CROCACIN-D                                                                                                  | TRANSCRIPTION     |
| 3CWD | MOLECULAR RECOGNITION OF NITRO-FATTY ACIDS BY PPAR GAMMA                                                                                                                                        | HYDROLASE         |
| 3CWW | CRYSTAL STRUCTURE OF IDE-BRADYKININ COMPLEX                                                                                                                                                     | TRANSPORT PROTEIN |
| 3CWZ | STRUCTURE OF RAB6(GTP)-R6IP1 COMPLEX                                                                                                                                                            | OXIDOREDUCTASE    |
| 3CX5 | STRUCTURE OF COMPLEX III WITH BOUND CYTOCHROME C IN REDUCED STATE AND DEFINITION OF A MINIMAL CORE INTERFACE FOR ELECTRON TRANSFER.                                                             | SIGNALING PROTEIN |
| 3CX6 | CRYSTAL STRUCTURE OF PDZRHOGEF RGRGS DOMAIN IN A COMPLEX WITH GALPHA-13 BOUND TO GDP                                                                                                            | SIGNALING PROTEIN |
| 3CX7 | CRYSTAL STRUCTURE OF PDZRHOGEF RGRGS DOMAIN IN A COMPLEX WITH GALPHA-13 BOUND TO GDP-ALF4                                                                                                       | SIGNALING PROTEIN |
| 3CX8 | CRYSTAL STRUCTURE OF PDZRHOGEF RGRGS DOMAIN IN A COMPLEX WITH GALPHA-13 BOUND TO GTP-GAMMA-S                                                                                                    | SIGNALING PROTEIN |
| 3CXB | CRYSTAL STRUCTURE OF SIFA AND SKIP                                                                                                                                                              | IMMUNE SYSTEM     |
| 3CXD | CRYSTAL STRUCTURE OF ANTI-OSTEOPONTIN ANTIBODY 23C3 IN COMPLEX WITH ITS EPI TOPE PEPTIDE                                                                                                        | CYTOKINE          |
| 3CXE | STRUCTURE OF THE GM-CSF RECEPTOR COMPLEX                                                                                                                                                        | OXIDOREDUCTASE    |
| 3CXH | STRUCTURE OF YEAST COMPLEX III WITH ISOFORM-2 CYTOCHROME C BOUND AND DEFINITION OF A MINIMAL CORE INTERFACE FOR ELECTRON TRANSFER.                                                              | TRANSFERASE       |
| 3CXW | CRYSTAL STRUCTURE OF HUMAN PROTO-ONCOGENE SERINE THREONINE KINASE (PIM1) IN COMPLEX WITH A CONSENSUS PEPTIDE AND A BETA CARBOLINE LIGAND I                                                      | TRANSFERASE       |
| 3CY2 | CRYSTAL STRUCTURE OF HUMAN PROTO-ONCOGENE SERINE THREONINE KINASE (PIM1) IN COMPLEX WITH A CONSENSUS PEPTIDE AND A BETA CARBOLINE LIGAND II                                                     | TRANSFERASE       |
| 3CY3 | CRYSTAL STRUCTURE OF HUMAN PROTO-ONCOGENE SERINE THREONINE                                                                                                                                      | TRANSFERASE       |

|      |                                                                                                                                                                                                       |                                   |
|------|-------------------------------------------------------------------------------------------------------------------------------------------------------------------------------------------------------|-----------------------------------|
|      | KINASE (PIM1) IN COMPLEX WITH A CONSENSUS PEPTIDE AND THE JNK INHIBITOR V                                                                                                                             |                                   |
| 3CYY | THE CRYSTAL STRUCTURE OF ZO-1 PDZ2 IN COMPLEX WITH THE CX43 PEPTIDE                                                                                                                                   | PEPTIDE BINDING PROTEIN           |
| 3CZU | CRYSTAL STRUCTURE OF THE HUMAN EPHRIN A2- EPHRIN A1 COMPLEX                                                                                                                                           | TRANSFERASE/SIGNALING PROTEIN     |
| 3D0G | CRYSTAL STRUCTURE OF SPIKE PROTEIN RECEPTOR-BINDING DOMAIN FROM THE 2002-2003 SARS CORONAVIRUS HUMAN STRAIN COMPLEXED WITH HUMAN-CIVET CHIMERIC RECEPTOR ACE2                                         | HYDROLASE                         |
| 3D0H | CRYSTAL STRUCTURE OF SPIKE PROTEIN RECEPTOR-BINDING DOMAIN FROM THE 2002-2003 SARS CORONAVIRUS CIVET STRAIN COMPLEXED WITH HUMAN-CIVET CHIMERIC RECEPTOR ACE2                                         | HYDROLASE                         |
| 3D0I | CRYSTAL STRUCTURE OF SPIKE PROTEIN RECEPTOR-BINDING DOMAIN FROM THE 2005-2006 SARS CORONAVIRUS CIVET STRAIN COMPLEXED WITH HUMAN-CIVET CHIMERIC RECEPTOR ACE2                                         | HYDROLASE                         |
| 3D0L | CRYSTAL STRUCTURE OF THE HIV-1 BROADLY NEUTRALIZING ANTIBODY 2F5 IN COMPLEX WITH THE GP41 FP-MPER HYB3K CONSTRUCT 514GIGALFLGFLGAAGS528KK-AHX-655KNEQELLELDKWASLWN671                                 | IMMUNE SYSTEM                     |
| 3D0V | CRYSTAL STRUCTURE OF THE HIV-1 CROSS NEUTRALIZING MONOCLONAL ANTIBODY 2F5 IN COMPLEX WITH GP41 PEPTIDE LLELDKWASLW                                                                                    | IMMUNE SYSTEM                     |
| 3D17 | A TRIPLY LIGATED CRYSTAL STRUCTURE OF RELAXED STATE HUMAN HEMOGLOBIN                                                                                                                                  | OXYGEN BINDING                    |
| 3D1E | CRYSTAL STRUCTURE OF E. COLI SLIDING CLAMP (BETA) BOUND TO A POLYMERASE II PEPTIDE                                                                                                                    | TRANSFERASE, TRANSCRIPTION        |
| 3D1F | CRYSTAL STRUCTURE OF E. COLI SLIDING CLAMP (BETA) BOUND TO A POLYMERASE III PEPTIDE                                                                                                                   | TRANSFERASE, TRANSCRIPTION        |
| 3D1K | R/T INTERMEDIATE QUATERNARY STRUCTURE OF AN ANTARCTIC FISH HEMOGLOBIN IN AN ALPHA(CO)-BETA(PENTACOORDINATE) STATE                                                                                     | OXYGEN BINDING                    |
| 3D1M | CRYSTAL STRUCTURE OF SONIC HEDGEHOG BOUND TO THE THIRD FNIII DOMAIN OF CDO                                                                                                                            | SIGNALING PROTEIN / CELL ADHESION |
| 3D24 | CRYSTAL STRUCTURE OF LIGAND-BINDING DOMAIN OF ESTROGEN-RELATED RECEPTOR ALPHA (ERRALPHA) IN COMPLEX WITH THE PEROXISOME PROLIFERATORS-ACTIVATED RECEPTOR COACTIVATOR-1ALPHA BOX3 PEPTIDE (PGC-1ALPHA) | TRANSCRIPTION                     |
| 3D29 | PROTEASOME INHIBITION BY FELLUTAMIDE B                                                                                                                                                                | HYDROLASE                         |
| 3D2E | CRYSTAL STRUCTURE OF A COMPLEX OF SSE1P AND HSP70, SELENOMETHIONINE-LABELED CRYSTALS                                                                                                                  | CHAPERONE                         |
| 3D2F | CRYSTAL STRUCTURE OF A COMPLEX OF SSE1P AND HSP70                                                                                                                                                     | CHAPERONE                         |
| 3D2U | STRUCTURE OF UL18, A PEPTIDE-BINDING VIRAL MHC MIMIC, BOUND TO A HOST INHIBITORY RECEPTOR                                                                                                             | IMMUNE SYSTEM                     |
| 3D31 | MODBC FROM METHANOSARCINA ACETIVORANS                                                                                                                                                                 | TRANSPORT PROTEIN                 |
| 3D32 | COMPLEX OF GABA(A) RECEPTOR-ASSOCIATED PROTEIN (GABARAP) WITH A SYNTHETIC PEPTIDE                                                                                                                     | TRANSPORT PROTEIN                 |
| 3D38 | CRYSTAL STRUCTURE OF NEW TRIGONAL FORM OF PHOTOSYNTHETIC                                                                                                                                              | PHOTOSYNTHESIS                    |

|      |                                                                                                                                                                                                                                                                            |                               |
|------|----------------------------------------------------------------------------------------------------------------------------------------------------------------------------------------------------------------------------------------------------------------------------|-------------------------------|
|      | REACTION CENTER FROM BLASTOCHLORIS VIRIDIS. CRYSTALS GROWN IN MICROFLUIDICS BY DETERGENT CAPTURE                                                                                                                                                                           |                               |
| 3D3T | CRYSTAL STRUCTURE OF HIV-1 CRF01_AE IN COMPLEX WITH THE SUBSTRATE P1-P6                                                                                                                                                                                                    | HYDROLASE                     |
| 3D3X | CRYSTAL STRUCTURE OF BOTULINUM NEUROTOXIN SEROTYPE E CATALYTIC DOMAIN IN COMPLEX WITH SNAP-25 SUBSTRATE PEPTIDE                                                                                                                                                            | HYDROLASE                     |
| 3D48 | CRYSTAL STRUCTURE OF A PROLACTIN RECEPTOR ANTAGONIST BOUND TO THE EXTRACELLULAR DOMAIN OF THE PROLACTIN RECEPTOR                                                                                                                                                           | HORMONE/HORMONE RECEPTOR      |
| 3D4B | CRYSTAL STRUCTURE OF SIR2TM IN COMPLEX WITH ACETYL P53 PEPTIDE AND DADME-NAD+                                                                                                                                                                                              | HYDROLASE                     |
| 3D4U | BOVINE THROMBIN-ACTIVATABLE FIBRINOLYSIS INHIBITOR (TAFIA) IN COMPLEX WITH TICK-DERIVED CARBOXYPEPTIDASE INHIBITOR.                                                                                                                                                        | HYDROLASE/HYDROLASE INHIBITOR |
| 3D54 | STRUCTURE OF PURLQS FROM THERMOTOGA MARITIMA                                                                                                                                                                                                                               | LIGASE                        |
| 3D5A | STRUCTURAL BASIS FOR TRANSLATION TERMINATION ON THE 70S RIBOSOME. THIS FILE CONTAINS THE 30S SUBUNIT, RELEASE FACTOR 1 (RF1), TWO TRNA, AND MRNA MOLECULES OF ONE 70S RIBOSOME. THE ENTIRE CRYSTAL STRUCTURE CONTAINS TWO 70S RIBOSOMES AS DESCRIBED IN REMARK 400.        | RIBOSOME                      |
| 3D5B | STRUCTURAL BASIS FOR TRANSLATION TERMINATION ON THE 70S RIBOSOME. THIS FILE CONTAINS THE 50S SUBUNIT OF ONE 70S RIBOSOME. THE ENTIRE CRYSTAL STRUCTURE CONTAINS TWO 70S RIBOSOMES AS DESCRIBED IN REMARK 400.                                                              | RIBOSOME                      |
| 3D5C | STRUCTURAL BASIS FOR TRANSLATION TERMINATION ON THE 70S RIBOSOME. THIS FILE CONTAINS THE 30S SUBUNIT, RELEASE FACTOR 1 (RF1), TWO TRNA, AND MRNA MOLECULES OF THE SECOND 70S RIBOSOME. THE ENTIRE CRYSTAL STRUCTURE CONTAINS TWO 70S RIBOSOMES AS DESCRIBED IN REMARK 400. | RIBOSOME                      |
| 3D5D | STRUCTURAL BASIS FOR TRANSLATION TERMINATION ON THE 70S RIBOSOME. THIS FILE CONTAINS THE 50S SUBUNIT OF THE SECOND 70S RIBOSOME. THE ENTIRE CRYSTAL STRUCTURE CONTAINS TWO 70S RIBOSOMES AS DESCRIBED IN REMARK 400.                                                       | RIBOSOME                      |
| 3D5O | STRUCTURAL RECOGNITION AND FUNCTIONAL ACTIVATION OF FCRR BY INNATE PENTRAXINS                                                                                                                                                                                              | IMMUNE SYSTEM                 |
| 3D5R | CRYSTAL STRUCTURE OF EFB-C (N138A) / C3D COMPLEX                                                                                                                                                                                                                           | CELL ADHESION/TOXIN           |
| 3D5S | CRYSTAL STRUCTURE OF EFB-C (R131A) / C3D COMPLEX                                                                                                                                                                                                                           | CELL ADHESION/TOXIN           |
| 3D7S | CRYSTAL STRUCTURE OF WILD-TYPE E. COLI ASPARATE TRANSCARBAMOYLASE AT PH 8.5 AT 2.80 A RESOLUTION                                                                                                                                                                           | TRANSFERASE                   |
| 3D7T | STRUCTURAL BASIS FOR THE RECOGNITION OF C-SRC BY ITS INACTIVATOR CSK                                                                                                                                                                                                       | TRANSFERASE                   |
| 3D7V | CRYSTAL STRUCTURE OF MCL-1 IN COMPLEX WITH AN MCL-1 SELECTIVE BH3 LIGAND                                                                                                                                                                                                   | APOPTOSIS                     |
| 3D7W | MISTLETOE LECTIN I IN COMPLEX WITH ZEATIN                                                                                                                                                                                                                                  | HYDROLASE                     |
| 3D81 | SIR2-S-ALKYLAMIDATE COMPLEX CRYSTAL STRUCTURE                                                                                                                                                                                                                              | HYDROLASE                     |
| 3D85 | CRYSTAL STRUCTURE OF IL-23 IN COMPLEX WITH NEUTRALIZING FAB                                                                                                                                                                                                                | IMMUNE SYSTEM/CYTOKINE        |
| 3D87 | CRYSTAL STRUCTURE OF INTERLEUKIN-23                                                                                                                                                                                                                                        | CYTOKINE                      |

|      |                                                                                                                                          |                                          |
|------|------------------------------------------------------------------------------------------------------------------------------------------|------------------------------------------|
| 3D8A | CO-CRYSTAL STRUCTURE OF TRAM-TRAD COMPLEX.                                                                                               | DNA BINDING PROTEIN                      |
| 3D8C | FACTOR INHIBITING HIF-1 ALPHA D201G MUTANT IN COMPLEX WITH ZN(II), ALPHA-KETOGLUTARATE AND HIF-1 ALPHA 19MER                             | TRANSCRIPTION REGULATOR, OXIDOREDUCTASE  |
| 3D9A | HIGH RESOLUTION CRYSTAL STRUCTURE OF HYHEL10 FAB COMPLEXED TO HEN EGG LYSOZYME                                                           | HYDROLASE/IMMUNE SYSTEM                  |
| 3D9K | SNAPSHOTS OF THE RNA PROCESSING FACTOR SCAF8 BOUND TO DIFFERENT PHOSPHORYLATED FORMS OF THE CARBOXY-TERMINAL DOMAIN OF RNA-POLYMERASE II | TRANSCRIPTION                            |
| 3D9L | SNAPSHOTS OF THE RNA PROCESSING FACTOR SCAF8 BOUND TO DIFFERENT PHOSPHORYLATED FORMS OF THE CARBOXY-TERMINAL DOMAIN OF RNA-POLYMERASE II | TRANSCRIPTION                            |
| 3D9M | SNAPSHOTS OF THE RNA PROCESSING FACTOR SCAF8 BOUND TO DIFFERENT PHOSPHORYLATED FORMS OF THE CARBOXY-TERMINAL DOMAIN OF RNA-POLYMERASE II | TRANSCRIPTION                            |
| 3D9N | SNAPSHOTS OF THE RNA PROCESSING FACTOR SCAF8 BOUND TO DIFFERENT PHOSPHORYLATED FORMS OF THE CARBOXY-TERMINAL DOMAIN OF RNA-POLYMERASE II | TRANSCRIPTION                            |
| 3D9O | SNAPSHOTS OF THE RNA PROCESSING FACTOR SCAF8 BOUND TO DIFFERENT PHOSPHORYLATED FORMS OF THE CARBOXY-TERMINAL DOMAIN OF RNA-POLYMERASE II | TRANSCRIPTION                            |
| 3D9P | SNAPSHOTS OF THE RNA PROCESSING FACTOR SCAF8 BOUND TO DIFFERENT PHOSPHORYLATED FORMS OF THE CARBOXY-TERMINAL DOMAIN OF RNA-POLYMERASE II | TRANSCRIPTION                            |
| 3D9T | CIAP1-BIR3 IN COMPLEX WITH N-TERMINAL PEPTIDE FROM CASPASE-9 (ATPFQE)                                                                    | APOPTOSIS                                |
| 3D9U | THE BIR3 DOMAIN OF CIAP1 IN COMPLEX WITH THE N TERMINAL PEPTIDE FROM SMAC/DIABLO (AVPIAQ).                                               | APOPTOSIS                                |
| 3DAB | STRUCTURE OF THE HUMAN MDMX PROTEIN BOUND TO THE P53 TUMOR SUPPRESSOR TRANSACTIVATION DOMAIN                                             | CELL CYCLE                               |
| 3DAC | STRUCTURE OF THE HUMAN MDMX PROTEIN BOUND TO THE P53 TUMOR SUPPRESSOR TRANSACTIVATION DOMAIN                                             | CELL CYCLE                               |
| 3DAW | STRUCTURE OF THE ACTIN-DEPOLYMERIZING FACTOR HOMOLOGY DOMAIN IN COMPLEX WITH ACTIN                                                       | STRUCTURAL PROTEIN/STRUCTURAL PROTEIN RE |
| 3DBH | STRUCTURAL DISSECTION OF A GATING MECHANISM PREVENTING MISACTIVATION OF UBIQUITIN BY NEDD8'S E1 (APPBP1-UBA3ARG190ALA-NEDD8ALA72ARG)     | CELL CYCLE                               |
| 3DBJ | ALLOPHYCOCYANIN FROM THERMOSYNECHOCOCCUS VULCANUS                                                                                        | PHOTOSYNTHESIS                           |
| 3DBL | STRUCTURAL DISSECTION OF A GATING MECHANISM PREVENTING MISACTIVATION OF UBIQUITIN BY NEDD8'S E1 (APPBP1-UBA3ARG190WT-NEDD8ALA72GLN)      | CELL CYCLE                               |
| 3DBO | CRYSTAL STRUCTURE OF A MEMBER OF THE VAPBC FAMILY OF TOXIN-ANTITOXIN SYSTEMS, VAPBC-5, FROM MYCOBACTERIUM TUBERCULOSIS                   | TOXIN/ANTITOXIN                          |
| 3DBR | STRUCTURAL DISSECTION OF A GATING MECHANISM PREVENTING MISACTIVATION OF UBIQUITIN BY NEDD8'S E1 (APPBP1-UBA3ARG190GLN-NEDD8ALA72ARG)     | CELL CYCLE                               |
|      |                                                                                                                                          | LIGASE/VIRAL PROTEIN                     |

|      |                                                                                                                    |                                        |
|------|--------------------------------------------------------------------------------------------------------------------|----------------------------------------|
| 3DCG | CRYSTAL STRUCTURE OF THE HIV VIF BC-BOX IN COMPLEX WITH HUMAN ELONGINB AND ELONGINC                                | HYDROLASE                              |
| 3DCK | X-RAY STRUCTURE OF D25N CHEMICAL ANALOGUE OF HIV-1 PROTEASE COMPLEXED WITH KETOMETHYLENE ISOSTERE INHIBITOR        | HYDROLASE                              |
| 3DCR | X-RAY STRUCTURE OF HIV-1 PROTEASE AND HYDRATED FORM OF KETOMETHYLENE ISOSTERE INHIBITOR                            | TRANSCRIPTION/TRANSCRIPTION ACTIVATOR  |
| 3DCT | FXR WITH SRC1 AND GW4064                                                                                           | TRANSCRIPTION/TRANSCRIPTION ACTIVATOR  |
| 3DCU | FXR WITH SRC1 AND GSK8062                                                                                          | HYDROLASE/RNA                          |
| 3DD2 | CRYSTAL STRUCTURE OF AN RNA APTAMER BOUND TO HUMAN THROMBIN                                                        | RIBOSOME INHIBITOR                     |
| 3DD7 | STRUCTURE OF DOCH66Y IN COMPLEX WITH THE C-TERMINAL DOMAIN OF PHD                                                  | HYDROLASE                              |
| 3DDA | CRYSTAL STRUCTURE OF THE CATALYTIC DOMAIN OF BOTULINUM NEUROTOXIN SEROTYPE A WITH A SNAP-25 PEPTIDE                | HYDROLASE                              |
| 3DDB | CRYSTAL STRUCTURE OF THE CATALYTIC DOMAIN OF BOTULINUM NEUROTOXIN SEROTYPE A WITH A SUBSTRATE ANALOG PEPTIDE       | HYDROLASE/APOPTOSIS                    |
| 3DDC | CRYSTAL STRUCTURE OF NORE1A IN COMPLEX WITH RAS                                                                    | TRANSFERASE/CELL CYCLE                 |
| 3DDP | STRUCTURE OF PHOSPHORYLATED THR160 CDK2/CYCLIN A IN COMPLEX WITH THE INHIBITOR CR8                                 | TRANSFERASE/CELL CYCLE                 |
| 3DDQ | STRUCTURE OF PHOSPHORYLATED THR160 CDK2/CYCLIN A IN COMPLEX WITH THE INHIBITOR ROSCOVITINE                         | HYDROLASE                              |
| 3DF0 | CALCIUM-DEPENDENT COMPLEX BETWEEN M-CALPAIN AND CALPASTATIN                                                        | RIBOSOME                               |
| 3DEG | COMPLEX OF ELONGATING ESCHERICHIA COLI 70S RIBOSOME AND EF4(LEPA)-GMPPNP                                           | PROTEIN TRANSPORT, MEMBRANE PROTEIN    |
| 3DEP | STRUCTURAL BASIS FOR SPECIFIC SUBSTRATE RECOGNITION BY THE CHLOROPLAST SIGNAL RECOGNITION PARTICLE PROTEIN CPSRP43 | MEMBRANE PROTEIN                       |
| 3DET | STRUCTURE OF THE E418A, Y445A DOUBLY UNGATED MUTANT OF E.COLI CLC_EC1, CL-/H+ ANTIporter                           | CYTOKINE/SIGNALING PROTEIN             |
| 3DGC | STRUCTURE OF IL-22/IL-22R1                                                                                         | IMMUNE SYSTEM                          |
| 3DGG | CRYSTAL STRUCTURE OF FABOX108                                                                                      | TRANSCRIPTION                          |
| 3DGP | CRYSTAL STRUCTURE OF THE COMPLEX BETWEEN TFB5 AND THE C-TERMINAL DOMAIN OF TFB2                                    | MEMBRANE PROTEIN/HYDROLASE             |
| 3DHW | CRYSTAL STRUCTURE OF METHIONINE IMPORTER METNI                                                                     | TRANSFERASE                            |
| 3DI6 | HIV-1 RT WITH PYRIDAZINONE NON-NUCLEOSIDE INHIBITOR                                                                | IMMUNE SYSTEM                          |
| 3DIF | CRYSTAL STRUCTURE OF FABOX117                                                                                      | MEMBRANE PROTEIN, PROTEIN TRANSPORT    |
| 3DIN | CRYSTAL STRUCTURE OF THE PROTEIN-TRANSLOCATION COMPLEX FORMED BY THE SECY CHANNEL AND THE SECA ATPASE              | SIGNALING PROTEIN/CELL ADHESION        |
| 3DIW | C-TERMINAL BETA-CATENIN BOUND TIP-1 STRUCTURE                                                                      | STRUCTURAL PROTEIN/VIRUS LIKE PARTICLE |
| 3DKT | CRYSTAL STRUCTURE OF THERMOTOGA MARITIMA ENCAPSULIN                                                                | PROTEIN TRANSPORT                      |
| 3DL8 | STRUCTURE OF THE COMPLEX OF AQUIFEX AEOLICUS SECYEG AND BACILLUS SUBTILIS SECA                                     |                                        |

|      |                                                                                                                                                                                                         |                            |
|------|---------------------------------------------------------------------------------------------------------------------------------------------------------------------------------------------------------|----------------------------|
| 3DLE | CRYSTAL STRUCTURE OF HIV-1 REVERSE TRANSCRIPTASE IN COMPLEX WITH GF128590.                                                                                                                              | TRANSFERASE                |
| 3DLG | CRYSTAL STRUCTURE OF HIV-1 REVERSE TRANSCRIPTASE IN COMPLEX WITH GW564511.                                                                                                                              | TRANSFERASE                |
| 3DLK | CRYSTAL STRUCTURE OF AN ENGINEERED FORM OF THE HIV-1 REVERSE TRANSCRIPTASE, RT69A                                                                                                                       | TRANSFERASE                |
| 3DLL | THE OXAZOLIDINONE ANTIBIOTICS PERTURB THE RIBOSOMAL PEPTIDYL-TRANSFERASE CENTER AND EFFECT TRNA POSITIONING                                                                                             | RIBOSOME                   |
| 3DLQ | CRYSTAL STRUCTURE OF THE IL-22/IL-22R1 COMPLEX                                                                                                                                                          | CYTOKINE/CYTOKINE RECEPTOR |
| 3DM1 | CRYSTAL STRUCTURE OF THE COMPLEX OF HUMAN CHROMOX3 HOMOLOG 3 (CBX3) WITH PEPTIDE                                                                                                                        | TRANSCRIPTION              |
| 3DM2 | CRYSTAL STRUCTURE OF HIV-1 K103N MUTANT REVERSE TRANSCRIPTASE IN COMPLEX WITH GW564511.                                                                                                                 | TRANSFERASE                |
| 3DMJ | CRYSTAL STRUCTURE OF HIV-1 V106A AND Y181C MUTANT REVERSE TRANSCRIPTASE IN COMPLEX WITH GW564511.                                                                                                       | TRANSFERASE                |
| 3DMT | STRUCTURE OF GLYCOSOMAL GLYCERALDEHYDE-3-PHOSPHATE DEHYDROGENASE FROM TRYPANOSOMA CRUZI IN COMPLEX WITH THE IRREVERSIBLE IODOACETATE INHIBITOR                                                          | OXIDOREDUCTASE             |
| 3DNJ | THE STRUCTURE OF THE CAULOBACTER CRESCENTUS CLPS PROTEASE ADAPTOR PROTEIN IN COMPLEX WITH A N-END RULE PEPTIDE                                                                                          | PEPTIDE BINDING PROTEIN    |
| 3DOG | STRUCTURE OF THR 160 PHOSPHORYLATED CDK2/CYCLIN A IN COMPLEX WITH THE INHIBITOR N-&-N1                                                                                                                  | TRANSFERASE, CELL CYCLE    |
| 3DOK | CRYSTAL STRUCTURE OF K103N MUTANT HIV-1 REVERSE TRANSCRIPTASE IN COMPLEX WITH GW678248.                                                                                                                 | TRANSFERASE                |
| 3DOL | CRYSTAL STRUCTURE OF L100I MUTANT HIV-1 REVERSE TRANSCRIPTASE IN COMPLEX WITH GW695634.                                                                                                                 | TRANSFERASE                |
| 3DOM | CRYSTAL STRUCTURE OF THE COMPLEX BETWEEN TFB5 AND THE C-TERMINAL DOMAIN OF TFB2                                                                                                                         | TRANSCRIPTION              |
| 3DPL | STRUCTURAL INSIGHTS INTO NEDD8 ACTIVATION OF CULLIN-RING LIGASES: CONFORMATIONAL CONTROL OF CONJUGATION.                                                                                                | LIGASE                     |
| 3DPY | PROTEIN FARNESYLTRANSFERASE COMPLEXED WITH FPP AND CAGED TKCVIM SUBSTRATE                                                                                                                               | TRANSFERASE                |
| 3DQB | CRYSTAL STRUCTURE OF THE ACTIVE G-PROTEIN-COUPLED RECEPTOR OPSIN IN COMPLEX WITH A C-TERMINAL PEPTIDE DERIVED FROM THE GALPHA SUBUNIT OF TRANSDUCIN                                                     | SIGNALING PROTEIN          |
| 3DQV | STRUCTURAL INSIGHTS INTO NEDD8 ACTIVATION OF CULLIN-RING LIGASES: CONFORMATIONAL CONTROL OF CONJUGATION                                                                                                 | LIGASE                     |
| 3DRA | CANDIDA ALBICANS PROTEIN GERANYLGERANYLTRANSFERASE-I COMPLEXED WITH GGPP                                                                                                                                | TRANSFERASE                |
| 3DRP | HIV REVERSE TRANSCRIPTASE IN COMPLEX WITH INHIBITOR R8E                                                                                                                                                 | TRANSFERASE                |
| 3DRQ | CRYSTAL STRUCTURE OF THE HIV-1 BROADLY NEUTRALIZING ANTIBODY 2F5 IN COMPLEX WITH THE GP41 FP-MPER HYB3K CONSTRUCT 514GIGALFLGFLGAAGS528KK-AHX-655KNEQELLELDKWASLWN671 SOAKED IN PEG/2-PROPANOL SOLUTION | IMMUNE SYSTEM              |

|      |                                                                                                                                       |                        |
|------|---------------------------------------------------------------------------------------------------------------------------------------|------------------------|
| 3DRR | HIV REVERSE TRANSCRIPTASE Y181C MUTANT IN COMPLEX WITH INHIBITOR R8E                                                                  | TRANSFERASE            |
| 3DRS | HIV REVERSE TRANSCRIPTASE K103N MUTANT IN COMPLEX WITH INHIBITOR R8D                                                                  | TRANSFERASE            |
| 3DS0 | HIV-1 CAPSID C-TERMINAL DOMAIN MUTANT (N183A) IN COMPLEX WITH AN INHIBITOR OF PARTICLE ASSEMBLY (CAI)                                 | VIRAL PROTEIN          |
| 3DS1 | HIV-1 CAPSID C-TERMINAL DOMAIN MUTANT (E187A) IN COMPLEX WITH AN INHIBITOR OF PARTICLE ASSEMBLY (CAI)                                 | VIRAL PROTEIN          |
| 3DS3 | HIV-1 CAPSID C-TERMINAL DOMAIN MUTANT (Y169A) IN COMPLEX WITH AN INHIBITOR OF PARTICLE ASSEMBLY (CAI)                                 | VIRAL PROTEIN          |
| 3DS4 | HIV-1 CAPSID C-TERMINAL DOMAIN MUTANT (L211S) IN COMPLEX WITH AN INHIBITOR OF PARTICLE ASSEMBLY (CAI)                                 | VIRAL PROTEIN          |
| 3DSF | CRYSTAL STRUCTURE OF ANTI-OSTEOPONTIN ANTIBODY 23C3 IN COMPLEX WITH W43A MUTATED EPI TOPE PEPTIDE                                     | IMMUNE SYSTEM          |
| 3DSS | CRYSTAL STRUCTURE OF RABGGTASE(Delta LRR; Delta IG)                                                                                   | TRANSFERASE            |
| 3DST | CRYSTAL STRUCTURE OF RABGGTASE(Delta LRR; Delta IG) IN COMPLEX WITH GERANYLGERANYL PYROPHOSPHATE                                      | TRANSFERASE            |
| 3DSU | CRYSTAL STRUCTURE OF RABGGTASE(Delta LRR; Delta IG) IN COMPLEX WITH FARNESYL PYROPHOSPHATE                                            | TRANSFERASE            |
| 3DSV | CRYSTAL STRUCTURE OF RABGGTASE(Delta LRR; Delta IG) IN COMPLEX WITH MONO-PRENYLATED PEPTIDE SER-CYS-SER-CYS(GG) DERIVATED FROM RAB7   | TRANSFERASE            |
| 3DSW | CRYSTAL STRUCTURE OF RABGGTASE(Delta LRR; Delta IG) IN COMPLEX WITH MONO-PRENYLATED PEPTIDE SER-CYS(GG)-SER-CYS DERIVATED FROM RAB7   | TRANSFERASE            |
| 3DSX | CRYSTAL STRUCTURE OF RABGGTASE(Delta LRR; Delta IG) IN COMPLEX WITH DI-PRENYLATED PEPTIDE SER-CYS(GG)-SER-CYS(GG) DERIVATED FROM RAB7 | TRANSFERASE            |
| 3DTP | TARANTULA HEAVY MEROMYOSIN OBTAINED BY FLEXIBLE DOCKING TO TARANTULA MUSCLE THICK FILAMENT CRYO-EM 3D-MAP                             | CONTRACTILE PROTEIN    |
| 3DTU | CATALYTIC CORE SUBUNITS (I AND II) OF CYTOCHROME C OXIDASE FROM RHODOBACTER SPHAEROIDES COMPLEXED WITH DEOXYCHOLIC ACID               | OXIDOREDUCTASE         |
| 3DU7 | TUBULIN-COLCHICINE-PHOMOPSIN A: STATHMIN-LIKE DOMAIN COMPLEX                                                                          | CELL CYCLE             |
| 3DUH | STRUCTURE OF INTERLEUKIN-23                                                                                                           | IMMUNE SYSTEM/CYTOKINE |
| 3DVE | CRYSTAL STRUCTURE OF CA2+/CAM-CAV2.2 IQ DOMAIN COMPLEX                                                                                | MEMBRANE PROTEIN       |
| 3DVG | CRYSTAL STRUCTURE OF K63-SPECIFIC FAB APU.3A8 BOUND TO K63-LINKED DI-UBIQUITIN                                                        | IMMUNE SYSTEM          |
| 3DVJ | CRYSTAL STRUCTURE OF CA2+/CAM-CAV2.2 IQ DOMAIN (WITHOUT CLONING ARTIFACT, HM TO TV) COMPLEX                                           | MEMBRANE PROTEIN       |
| 3DVK | CRYSTAL STRUCTURE OF CA2+/CAM-CAV2.3 IQ DOMAIN COMPLEX                                                                                | MEMBRANE PROTEIN       |
| 3DVM | CRYSTAL STRUCTURE OF CA2+/CAM-CAV2.1 IQ DOMAIN COMPLEX                                                                                | MEMBRANE PROTEIN       |
|      |                                                                                                                                       | IMMUNE SYSTEM          |

|          |                                                                                                                                |                                     |
|----------|--------------------------------------------------------------------------------------------------------------------------------|-------------------------------------|
| 3DVN     | CRYSTAL STRUCTURE OF K63-SPECIFIC FAB APU2.16 BOUND TO K63-LINKED DI-UBIQUITIN                                                 | VIRAL PROTEIN/APOPTOSIS             |
| 3DVU     | CRYSTAL STRUCTURE OF THE COMPLEX OF MURINE GAMMA-HERPESVIRUS 68 BCL-2 HOMOLOG M11 AND THE BECLIN 1 BH3 DOMAIN                  | HYDROLASE                           |
| 3DW8     | STRUCTURE OF A PROTEIN PHOSPHATASE 2A HOLOENZYME WITH B55 SUBUNIT                                                              | TRANSFERASE                         |
| 3DWG     | CRYSTAL STRUCTURE OF A SULFUR CARRIER PROTEIN COMPLEX FOUND IN THE CYSTEINE BIOSYNTHETIC PATHWAY OF MYCOBACTERIUM TUBERCULOSIS | STRUCTURAL PROTEIN                  |
| 3DWL     | CRYSTAL STRUCTURE OF FISSION YEAST ARP2/3 COMPLEX LACKING THE ARP2 SUBUNIT                                                     | PROTEIN BINDING                     |
| 3DXC     | CRYSTAL STRUCTURE OF THE INTRACELLULAR DOMAIN OF HUMAN APP IN COMPLEX WITH FE65-PTB2                                           | PROTEIN BINDING                     |
| 3DXD     | CRYSTAL STRUCTURE OF THE INTRACELLULAR DOMAIN OF HUMAN APP (T668E MUTANT) IN COMPLEX WITH FE65-PTB2                            | PROTEIN BINDING                     |
| 3DXE     | CRYSTAL STRUCTURE OF THE INTRACELLULAR DOMAIN OF HUMAN APP (T668A MUTANT) IN COMPLEX WITH FE65-PTB2                            | TRANSCRIPTION,TRANSFERASE           |
| 3DXJ     | CRYSTAL STRUCTURE OF THERMUS THERMOPHILUS RNA POLYMERASE HOLOENZYME IN COMPLEX WITH THE ANTIBIOTIC MYXOPYRONIN                 | PROTEIN TRANSPORT                   |
| 3DXR     | CRYSTAL STRUCTURE OF THE YEAST INTER-MEMBRANE SPACE CHAPERONE ASSEMBLY TIM9.10                                                 | BLOOD CLOTTING, HYDROLASE INHIBITOR |
| 3DY0     | CRYSTAL STRUCTURE OF CLEAVED PCI BOUND TO HEPARIN                                                                              | HYDROLASE                           |
| 3DY3     | CRYSTAL STRUCTURE OF YEAST 20S PROTEASOME IN COMPLEX WITH THE EPIMER FORM OF SPIROLACTACYSTIN                                  | HYDROLASE                           |
| 3DY4     | CRYSTAL STRUCTURE OF YEAST 20S PROTEASOME IN COMPLEX WITH SPIROLACTACYSTIN                                                     | TRANSFERASE                         |
| 3DYA     | HIV-1 RT WITH NON-NUCLEOSIDE INHIBITOR ANNULATED PYRAZOLE 1                                                                    | TRANSCRIPTION/DNA                   |
| 3DZU     | INTACT PPAR GAMMA - RXR ALPHA NUCLEAR RECEPTOR COMPLEX ON DNA BOUND WITH BVT.13, 9-CIS RETINOIC ACID AND NCOA2 PEPTIDE         | TRANSCRIPTION/DNA                   |
| 3DZY     | INTACT PPAR GAMMA - RXR ALPHA NUCLEAR RECEPTOR COMPLEX ON DNA BOUND WITH ROSIGLITAZONE, 9-CIS RETINOIC ACID AND NCOA2 PEPTIDE  | TRANSCRIPTION/DNA                   |
| 3.00E+00 | INTACT PPAR GAMMA - RXR ALPHA NUCLEAR RECEPTOR COMPLEX ON DNA BOUND WITH GW9662, 9-CIS RETINOIC ACID AND NCOA2 PEPTIDE         | TRANSFERASE                         |
| 3.00E+01 | HIV-RT WITH NON-NUCLEOSIDE INHIBITOR ANNULATED PYRAZOLE 2                                                                      | TRANSFERASE                         |
| 3E0J     | X-RAY STRUCTURE OF THE COMPLEX OF REGULATORY SUBUNITS OF HUMAN DNA POLYMERASE DELTA                                            | TRANSCRIPTION                       |
| 3E1K     | CRYSTAL STRUCTURE OF KLUYVEROMYCES LACTIS GAL80P IN COMPLEX WITH THE ACIDIC ACTIVATION DOMAIN OF GAL4P                         | CELL CYCLE/TRANSPORT PROTEIN        |
| 3E1R     | MIDBODY TARGETING OF THE ESCRT MACHINERY BY A NON-CANONICAL COILED-COIL IN CEP55                                               | CELL CYCLE                          |



|          |                                                                                                                                                  |                                         |
|----------|--------------------------------------------------------------------------------------------------------------------------------------------------|-----------------------------------------|
| 3.00E+22 | TUBULIN-COLCHICINE-SOBLIDOTIN: STATHMIN-LIKE DOMAIN COMPLEX                                                                                      |                                         |
| 3E2H     | STRUCTURE OF THE M67 HIGH-AFFINITY MUTANT OF THE 2C TCR IN COMPLEX WITH LD/QL9                                                                   | IMMUNE SYSTEM                           |
| 3E3Q     | STRUCTURE OF THE 3ALPHAM13 HIGH-AFFINITY MUTANT OF THE 2C TCR IN COMPLEX WITH LD/QL9                                                             | IMMUNE SYSTEM                           |
| 3.00E+47 | CRYSTAL STRUCTURE OF THE YEAST 20S PROTEASOME IN COMPLEX WITH HOMOBELACTOSIN C                                                                   | HYDROLASE                               |
| 3E5A     | CRYSTAL STRUCTURE OF AURORA A IN COMPLEX WITH VX-680 AND TPX2                                                                                    | TRANSFERASE                             |
| 3E6P     | CRYSTAL STRUCTURE OF HUMAN MEIZOTHROMBIN DESF1                                                                                                   | HYDROLASE                               |
| 3E7C     | GLUCOCORTICOID RECEPTOR LBD BOUND TO GSK866                                                                                                      | TRANSCRIPTION                           |
| 3E7S     | STRUCTURE OF BOVINE INOS OXYGENASE DOMAIN WITH INHIBITOR AR-C95791                                                                               | OXIDOREDUCTASE                          |
| 3.00E+87 | CRYSTAL STRUCTURES OF THE KINASE DOMAIN OF AKT2 IN COMPLEX WITH ATP-COMPETITIVE INHIBITORS                                                       | TRANSFERASE                             |
| 3.00E+88 | CRYSTAL STRUCTURES OF THE KINASE DOMAIN OF AKT2 IN COMPLEX WITH ATP-COMPETITIVE INHIBITORS                                                       | TRANSFERASE                             |
| 3E8C     | CRYSTAL STRUCTURES OF THE KINASE DOMAIN OF PKA IN COMPLEX WITH ATP-COMPETITIVE INHIBITORS                                                        | TRANSFERASE                             |
| 3E8D     | CRYSTAL STRUCTURES OF THE KINASE DOMAIN OF AKT2 IN COMPLEX WITH ATP-COMPETITIVE INHIBITORS                                                       | TRANSFERASE                             |
| 3E8E     | CRYSTAL STRUCTURES OF THE KINASE DOMAIN OF PKA IN COMPLEX WITH ATP-COMPETITIVE INHIBITORS                                                        | TRANSFERASE                             |
| 3.00E+95 | CRYSTAL STRUCTURE OF THE PLASMODIUM FALCIPARUM UBIQUITIN CONJUGATING ENZYME COMPLEX, PFUBC13-PFUEV1A                                             | LIGASE                                  |
| 3E9J     | STRUCTURE OF THE CHARGE-TRANSFER INTERMEDIATE OF THE TRANSMEMBRANE REDOX CATALYST DSBB                                                           | OXIDOREDUCTASE                          |
| 3EA5     | KAP95P BINDING INDUCES THE SWITCH LOOPS OF RANGDP TO ADOPT THE GTP-BOUND CONFORMATION: IMPLICATIONS FOR NUCLEAR IMPORT COMPLEX ASSEMBLY DYNAMICS | TRANSPORT PROTEIN                       |
| 3EAB     | CRYSTAL STRUCTURE OF SPASTIN MIT IN COMPLEX WITH ESCRT III                                                                                       | CELL CYCLE                              |
| 3EB6     | STRUCTURE OF THE CIAP2 RING DOMAIN BOUND TO UBCH5B                                                                                               | APOPTOSIS, LIGASE                       |
| 3EBA     | CABHUL6 FGLW MUTANT (HUMANIZED) IN COMPLEX WITH HUMAN LYSOZYME                                                                                   | IMMUNE SYSTEM/HYDROLASE                 |
| 3ECH     | THE MARR-FAMILY REPRESSOR MEXR IN COMPLEX WITH ITS ANTIREPRESSOR ARM                                                                             | TRANSCRIPTION, TRANSCRIPTION REGULATION |
| 3EDQ     | CRYSTAL STRUCTURE OF CASPASE-3 WITH INHIBITOR AC-LDESD-CHO                                                                                       | HYDROLASE                               |
| 3EDR     | THE CRYSTAL STRUCTURE OF CASPASE-7 IN COMPLEX WITH ACETYL-LDESD-CHO                                                                              | HYDROLASE                               |
| 3EFO     | CRYSTAL STRUCTURE OF THE MAMMALIAN COPII-COAT PROTEIN SEC23/24 BOUND TO THE TRANSPORT SIGNAL SEQUENCE OF SYNTAXIN 5                              | PROTEIN TRANSPORT                       |
|          |                                                                                                                                                  | SIGNALING PROTEIN                       |

|      |                                                                                                                                                                                               |                                    |
|------|-----------------------------------------------------------------------------------------------------------------------------------------------------------------------------------------------|------------------------------------|
| 3EG5 | CRYSTAL STRUCTURE OF MDIA1-TSH GBD-FH3 IN COMPLEX WITH CDC42-GMPPNP                                                                                                                           | PROTEIN TRANSPORT                  |
| 3EG9 | CRYSTAL STRUCTURE OF THE MAMMALIAN COPII-COAT PROTEIN SEC23/24 BOUND TO THE TRANSPORT SIGNAL SEQUENCE OF MEMBRIN                                                                              | PROTEIN TRANSPORT                  |
| 3EGD | CRYSTAL STRUCTURE OF THE MAMMALIAN COPII-COAT PROTEIN SEC23A/24A COMPLEXED WITH THE SNARE PROTEIN SEC22 AND BOUND TO THE TRANSPORT SIGNAL SEQUENCE OF VESICULAR STOMATITIS VIRUS GLYCOPROTEIN | BLOOD CLOTTING/HYDROLASE INHIBITOR |
| 3EGK | KNOBLE INHIBITOR                                                                                                                                                                              | TRANSFERASE/RIBOSOMAL PROTEIN      |
| 3EGV | RIBOSOMAL PROTEIN L11 METHYLTRANSFERASE (PRMA) IN COMPLEX WITH TRIMETHYLATED RIBOSOMAL PROTEIN L11                                                                                            | PROTEIN TRANSPORT                  |
| 3EGX | CRYSTAL STRUCTURE OF THE MAMMALIAN COPII-COAT PROTEIN SEC23A/24A COMPLEXED WITH THE SNARE PROTEIN SEC22B AND BOUND TO THE TRANSPORT SIGNAL SEQUENCE OF THE SNARE PROTEIN BET1                 | MEMBRANE PROTEIN                   |
| 3EHT | CRYSTAL STRUCTURE OF THE EXTRACELLULAR DOMAIN OF HUMAN CORTICOTROPIN RELEASING FACTOR RECEPTOR TYPE 1 (CRFR1) IN COMPLEX WITH CRF                                                             | MEMBRANE PROTEIN                   |
| 3EHU | CRYSTAL STRUCTURE OF THE EXTRACELLULAR DOMAIN OF HUMAN CORTICOTROPIN RELEASING FACTOR RECEPTOR TYPE 1 (CRFR1) IN COMPLEX WITH CRF                                                             | TRANSFERASE/CELL CYCLE             |
| 3EID | CDK2/CYCLINA COMPLEXED WITH A PYRAZOLOPYRIDAZINE INHIBITOR                                                                                                                                    | TRANSFERASE/CELL CYCLE             |
| 3EJ1 | CDK2/CYCLINA COMPLEXED WITH A PYRAZOLOPYRIDAZINE INHIBITOR                                                                                                                                    | HYDROLASE                          |
| 3EJ3 | STRUCTURAL AND MECHANISTIC ANALYSIS OF TRANS-3-CHLOROACRYLIC ACID DEHALOGENASE ACTIVITY                                                                                                       | HYDROLASE                          |
| 3EJ7 | STRUCTURAL AND MECHANISTIC ANALYSIS OF TRANS-3-CHLOROACRYLIC ACID DEHALOGENASE ACTIVITY                                                                                                       | HYDROLASE                          |
| 3EJ9 | STRUCTURAL AND MECHANISTIC ANALYSIS OF TRANS-3-CHLOROACRYLIC ACID DEHALOGENASE ACTIVITY                                                                                                       | OXIDOREDUCTASE/LIPID TRANSPORT     |
| 3EJB | CRYSTAL STRUCTURE OF P450BIOI IN COMPLEX WITH TETRADECANOIC ACID LIGATED ACYL CARRIER PROTEIN                                                                                                 | OXIDOREDUCTASE/LIPID TRANSPORT     |
| 3EJD | CRYSTAL STRUCTURE OF P450BIOI IN COMPLEX WITH HEXADEC-9Z-ENOIC ACID LIGATED ACYL CARRIER PROTEIN                                                                                              | OXIDOREDUCTASE/LIPID TRANSPORT     |
| 3EJE | CRYSTAL STRUCTURE OF P450BIOI IN COMPLEX WITH OCTADEC-9Z-ENOIC ACID LIGATED ACYL CARRIER PROTEIN                                                                                              | CYTOKINE/SIGNALING PROTEIN         |
| 3EJJ | STRUCTURE OF M-CSF BOUND TO THE FIRST THREE DOMAINS OF FMS                                                                                                                                    | BLOOD CLOTTING                     |
| 3ELA | CRYSTAL STRUCTURE OF ACTIVE SITE INHIBITED COAGULATION FACTOR VIIIA MUTANT IN COMPLEX WITH SOLUBLE TISSUE FACTOR                                                                              | HYDROLASE/UNKNOWN FUNCTION         |
| 3ENH | CRYSTAL STRUCTURE OF CG1121/BUD32/KAЕ1 COMPLEX                                                                                                                                                | HYDROLASE/UNKNOWN FUNCTION         |
| 3ENO | CRYSTAL STRUCTURE OF PYROCOCCLUS FURIOSUS PCC1 IN COMPLEX WITH THERMOPLASMA ACIDOPHILUM KAE1                                                                                                  | IMMUNE SYSTEM                      |
| 3EO0 | STRUCTURE OF THE TRANSFORMING GROWTH FACTOR-BETA NEUTRALIZING ANTIBODY GC-1008                                                                                                                | IMMUNE SYSTEM/CYTOKINE             |
| 3EO1 | STRUCTURE OF THE FAB FRAGMENT OF GC-1008 IN COMPLEX WITH                                                                                                                                      |                                    |

| TRANSFORMING GROWTH FACTOR-BETA 3 |                                                                                                                                                                                                           |                                      |
|-----------------------------------|-----------------------------------------------------------------------------------------------------------------------------------------------------------------------------------------------------------|--------------------------------------|
| 3EOC                              | CDK2/CYCLINA COMPLEXED WITH A IMIDAZO TRIAZIN-2-AMINE                                                                                                                                                     | TRANSFERASE/CELL CYCLE               |
| 3EOY                              | STRUCTURE OF REOVIRUS SIGMA1 IN COMPLEX WITH ITS RECEPTOR JUNCTIONAL ADHESION MOLECULE-A                                                                                                                  | VIRAL PROTEIN/CELL ADHESION          |
| 3EP3                              | HUMAN ADO METDC D174N MUTANT WITH NO PUTRESCINE BOUND                                                                                                                                                     | LYASE                                |
| 3EP4                              | HUMAN ADO METDC E256Q MUTANT WITH NO PUTRESCINE BOUND                                                                                                                                                     | LYASE                                |
| 3EP5                              | HUMAN ADO METDC E178Q MUTANT WITH NO PUTRESCINE BOUND                                                                                                                                                     | LYASE                                |
| 3EP6                              | HUMAN ADO METDC D174N MUTANT COMPLEXED WITH S-ADENOSYLMETHIONINE METHYL ESTER AND NO PUTRESCINE BOUND                                                                                                     | LYASE                                |
| 3EP7                              | HUMAN ADO METDC E256Q MUTANT COMPLEXED WITH S-ADENOSYLMETHIONINE METHYL ESTER AND NO PUTRESCINE BOUND                                                                                                     | LYASE                                |
| 3EP8                              | HUMAN ADO METDC E178Q MUTANT COMPLEXED WITH S-ADENOSYLMETHIONINE METHYL ESTER AND NO PUTRESCINE BOUND                                                                                                     | LYASE                                |
| 3EP9                              | HUMAN ADO METDC WITH NO PUTRESCINE BOUND                                                                                                                                                                  | LYASE                                |
| 3EPA                              | HUMAN ADO METDC E178Q MUTANT COMPLEXED WITH PUTRESCINE                                                                                                                                                    | LYASE                                |
| 3EPB                              | HUMAN ADO METDC E256Q MUTANT COMPLEXED WITH PUTRESCINE                                                                                                                                                    | LYASE                                |
| 3EQL                              | CRYSTAL STRUCTURE OF THE T. THERMOPHILUS RNA POLYMERASE HOLOENZYME IN COMPLEX WITH ANTIBIOTIC MYXOPYRONIN                                                                                                 | TRANSFERASE                          |
| 3ER3                              | THE ACTIVE SITE OF ASPARTIC PROTEINASES                                                                                                                                                                   | HYDROLASE (ACID PROTEINASE)          |
| 3ER5                              | THE ACTIVE SITE OF ASPARTIC PROTEINASES                                                                                                                                                                   | HYDROLASE (ACID PROTEINASE)          |
| 3ERY                              | DIFFERENT THERMODYNAMIC BINDING MECHANISMS AND PEPTIDE FINE SPECIFICITIES ASSOCIATED WITH A PANEL OF STRUCTURALLY SIMILAR HIGH-AFFINITY T CELL RECEPTORS                                                  | IMMUNE SYSTEM                        |
| 3ESW                              | COMPLEX OF YEAST PNGASE WITH GLCNAC2-IAC.                                                                                                                                                                 | HYDROLASE                            |
| 3ET6                              | THE CRYSTAL STRUCTURE OF THE CATALYTIC DOMAIN OF A EUKARYOTIC GUANYLATE CYCLASE                                                                                                                           | LYASE                                |
| 3EWE                              | CRYSTAL STRUCTURE OF THE NUP85/SEH1 COMPLEX                                                                                                                                                               | PROTEIN TRANSPORT,STRUCTURAL PROTEIN |
| 3EX7                              | THE CRYSTAL STRUCTURE OF EJC IN ITS TRANSITION STATE                                                                                                                                                      | HYDROLASE/RNA BINDING PROTEIN/RNA    |
| 3EXE                              | CRYSTAL STRUCTURE OF THE PYRUVATE DEHYDROGENASE (E1P) COMPONENT OF HUMAN PYRUVATE DEHYDROGENASE COMPLEX                                                                                                   | OXIDOREDUCTASE                       |
| 3EXF                              | CRYSTAL STRUCTURE OF THE PYRUVATE DEHYDROGENASE (E1P) COMPONENT OF HUMAN PYRUVATE DEHYDROGENASE COMPLEX                                                                                                   | OXIDOREDUCTASE                       |
| 3EXG                              | CRYSTAL STRUCTURE OF THE PYRUVATE DEHYDROGENASE (E1P) COMPONENT OF HUMAN PYRUVATE DEHYDROGENASE COMPLEX                                                                                                   | OXIDOREDUCTASE                       |
| 3EXH                              | CRYSTAL STRUCTURE OF THE PYRUVATE DEHYDROGENASE (E1P) COMPONENT OF HUMAN PYRUVATE DEHYDROGENASE COMPLEX                                                                                                   | OXIDOREDUCTASE                       |
| 3EXI                              | CRYSTAL STRUCTURE OF THE PYRUVATE DEHYDROGENASE (E1P) COMPONENT OF HUMAN PYRUVATE DEHYDROGENASE COMPLEX WITH THE SUBUNIT-BINDING DOMAIN (SBD) OF E2P, BUT SBD CANNOT BE MODELED INTO THE ELECTRON DENSITY | OXIDOREDUCTASE                       |
|                                   |                                                                                                                                                                                                           | IMMUNE SYSTEM                        |

|      |                                                                                                                                                                                                                                                                              |                                      |
|------|------------------------------------------------------------------------------------------------------------------------------------------------------------------------------------------------------------------------------------------------------------------------------|--------------------------------------|
| 3EYF | CRYSTAL STRUCTURE OF ANTI-HUMAN CYTOMEGALOVIRUS ANTIBODY 8F9 PLUS GB PEPTIDE                                                                                                                                                                                                 |                                      |
|      |                                                                                                                                                                                                                                                                              | IMMUNE SYSTEM                        |
| 3EYO | CRYSTAL STRUCTURE OF ANTI-HUMAN CYTOMEGALOVIRUS ANTIBODY 8F9                                                                                                                                                                                                                 |                                      |
|      |                                                                                                                                                                                                                                                                              | IMMUNE SYSTEM                        |
| 3EYQ | CRYSTAL STRUCTURE OF MJ5 FAB, A GERMLINE ANTIBODY VARIANT OF ANTI-HUMAN CYTOMEGALOVIRUS ANTIBODY 8F9                                                                                                                                                                         |                                      |
|      |                                                                                                                                                                                                                                                                              | COMPLEX (TRANSFERASE/PHOSPHOCARRIER) |
| 3EZA | COMPLEX OF THE AMINO TERMINAL DOMAIN OF ENZYME I AND THE HISTIDINE-CONTAINING PHOSPHOCARRIER PROTEIN HPR FROM ESCHERICHIA COLI NMR, RESTRAINED REGULARIZED MEAN STRUCTURE                                                                                                    |                                      |
|      |                                                                                                                                                                                                                                                                              | TRANSFERASE                          |
| 3EZE | COMPLEX OF THE AMINO TERMINAL DOMAIN OF ENZYME I AND THE HISTIDINE-CONTAINING PHOSPHOCARRIER PROTEIN HPR FROM ESCHERICHIA COLI NMR, RESTRAINED REGULARIZED MEAN STRUCTURE                                                                                                    |                                      |
|      |                                                                                                                                                                                                                                                                              | APOPTOSIS                            |
| 3EZQ | CRYSTAL STRUCTURE OF THE FAS/FADD DEATH DOMAIN COMPLEX                                                                                                                                                                                                                       |                                      |
|      |                                                                                                                                                                                                                                                                              | RIBOSOME                             |
| 3F1E | CRYSTAL STRUCTURE OF A TRANSLATION TERMINATION COMPLEX FORMED WITH RELEASE FACTOR RF2. THIS FILE CONTAINS THE 30S SUBUNIT, RF2, TWO TRNA, AND MRNA MOLECULES OF ONE 70S RIBOSOME. THE ENTIRE CRYSTAL STRUCTURE CONTAINS TWO 70S RIBOSOMES AS DESCRIBED IN REMARK 400.        |                                      |
|      |                                                                                                                                                                                                                                                                              | RIBOSOME                             |
| 3F1F | CRYSTAL STRUCTURE OF A TRANSLATION TERMINATION COMPLEX FORMED WITH RELEASE FACTOR RF2. THIS FILE CONTAINS THE 50S SUBUNIT OF ONE 70S RIBOSOME. THE ENTIRE CRYSTAL STRUCTURE CONTAINS TWO 70S RIBOSOMES AS DESCRIBED IN REMARK 400.                                           |                                      |
|      |                                                                                                                                                                                                                                                                              | RIBOSOME                             |
| 3F1G | CRYSTAL STRUCTURE OF A TRANSLATION TERMINATION COMPLEX FORMED WITH RELEASE FACTOR RF2. THIS FILE CONTAINS THE 30S SUBUNIT, RF2, TWO TRNA, AND MRNA MOLECULES OF THE SECOND 70S RIBOSOME. THE ENTIRE CRYSTAL STRUCTURE CONTAINS TWO 70S RIBOSOMES AS DESCRIBED IN REMARK 400. |                                      |
|      |                                                                                                                                                                                                                                                                              | RIBOSOME                             |
| 3F1H | CRYSTAL STRUCTURE OF A TRANSLATION TERMINATION COMPLEX FORMED WITH RELEASE FACTOR RF2. THIS FILE CONTAINS THE 50S SUBUNIT OF THE SECOND 70S RIBOSOME. THE ENTIRE CRYSTAL STRUCTURE CONTAINS TWO 70S RIBOSOMES AS DESCRIBED IN REMARK 400.                                    |                                      |
|      |                                                                                                                                                                                                                                                                              | TRANSFERASE                          |
| 3F2K | STRUCTURE OF THE TRANSPOSASE DOMAIN OF HUMAN HISTONE-LYSINE N-METHYLTRANSFERASE SETMAR                                                                                                                                                                                       |                                      |
|      |                                                                                                                                                                                                                                                                              | APOPTOSIS/HYDROLASE                  |
| 3F2O | CRYSTAL STRUCTURE OF HUMAN SPLA/RYANODINE RECEPTOR DOMAIN AND SOCS BOX CONTAINING 1 (SPSB1) IN COMPLEX WITH A 20-RESIDUE VASA PEPTIDE                                                                                                                                        |                                      |
|      |                                                                                                                                                                                                                                                                              | IMMUNE SYSTEM                        |
| 3F58 | IGG1 FAB FRAGMENT (58.2) COMPLEX WITH 12-RESIDUE CYCLIC PEPTIDE (INCLUDING RESIDUES 315-324 OF HIV-1 GP120 (MN ISOLATE); H315S MUTATION                                                                                                                                      |                                      |
|      |                                                                                                                                                                                                                                                                              | TRANSCRIPTION                        |
| 3F5C | STRUCTURE OF DAX-1:LRH-1 COMPLEX                                                                                                                                                                                                                                             |                                      |
|      |                                                                                                                                                                                                                                                                              | SIGNALING PROTEIN/SIGNALING PROTEIN  |
| 3F6Q | CRYSTAL STRUCTURE OF INTEGRIN-LINKED KINASE ANKYRIN REPEAT DOMAIN IN COMPLEX WITH PINCH1 LIM1 DOMAIN                                                                                                                                                                         |                                      |
|      |                                                                                                                                                                                                                                                                              | HYDROLASE                            |
| 3F6U | CRYSTAL STRUCTURE OF HUMAN ACTIVATED PROTEIN C (APC) COMPLEXED WITH PPACK                                                                                                                                                                                                    |                                      |
|      |                                                                                                                                                                                                                                                                              | HYDROLASE                            |
| 3F6Z | CRYSTAL STRUCTURE OF PSEUDOMONAS AERUGINOSA MLIC IN COMPLEX WITH HEN EGG WHITE LYSOZYME                                                                                                                                                                                      |                                      |
|      |                                                                                                                                                                                                                                                                              | HYDROLASE                            |
| 3F75 | ACTIVATED TOXOPLASMA GONDII CATHEPSIN L (TGCP L) IN COMPLEX WITH ITS PROPEPTIDE                                                                                                                                                                                              |                                      |

|      |                                                                                                                                                             |                                          |
|------|-------------------------------------------------------------------------------------------------------------------------------------------------------------|------------------------------------------|
| 3F7D | SF-1 LBD BOUND BY PHOSPHATIDYLCHOLINE                                                                                                                       | TRANSCRIPTION                            |
| 3F9W | STRUCTURAL INSIGHTS INTO LYSINE MULTIPLE METHYLATION BY SET DOMAIN METHYLTRANSFERASES, SET8-Y334F / H4-LYS20 / ADOHCY                                       | TRANSFERASE                              |
| 3F9X | STRUCTURAL INSIGHTS INTO LYSINE MULTIPLE METHYLATION BY SET DOMAIN METHYLTRANSFERASES, SET8-Y334F / H4-LYS20ME2 / ADOHCY                                    | TRANSFERASE                              |
| 3F9Y | STRUCTURAL INSIGHTS INTO LYSINE MULTIPLE METHYLATION BY SET DOMAIN METHYLTRANSFERASES, SET8-Y334F / H4-LYS20ME1 / ADOHCY                                    | TRANSFERASE                              |
| 3F9Z | STRUCTURAL INSIGHTS INTO LYSINE MULTIPLE METHYLATION BY SET DOMAIN METHYLTRANSFERASES, SET8-Y245F / H4-LYS20 / ADOHCY                                       | TRANSFERASE                              |
| 3FAP | ATOMIC STRUCTURES OF THE RAPAMYCIN ANALOGS IN COMPLEX WITH BOTH HUMAN FKBP12 AND FRB DOMAIN OF FRAP                                                         | CELL CYCLE                               |
| 3FBI | STRUCTURE OF THE MEDIATOR SUBMODULE MED7N/31                                                                                                                | TRANSCRIPTION                            |
| 3FBN | STRUCTURE OF THE MEDIATOR SUBMODULE MED7N/31                                                                                                                | TRANSCRIPTION                            |
| 3FCT | MATURE METAL CHELATASE CATALYTIC ANTIBODY WITH HAPTEN                                                                                                       | IMMUNE SYSTEM                            |
| 3FDO | STRUCTURE OF HUMAN MDMX IN COMPLEX WITH HIGH AFFINITY PEPTIDE                                                                                               | CELL CYCLE                               |
| 3FG5 | CRYSTAL STRUCTURE DETERMINATION OF A TERNARY COMPLEX OF PHOSPHOLIPASE A2 WITH A PENTAPEPTIDE FLSYK AND AJMALINE AT 2.5 Å RESOLUTION                         | HYDROLASE                                |
| 3FIV | CRYSTAL STRUCTURE OF FELINE IMMUNODEFICIENCY VIRUS PROTEASE COMPLEXED WITH A SUBSTRATE                                                                      | COMPLEX (ACID PROTEINASE/SUBSTRATE)      |
| 3FRU | NEONATAL FC RECEPTOR, PH 6.5                                                                                                                                | COMPLEX (IMMUNOGLOBULIN/BINDING PROTEIN) |
| 3GCT | STRUCTURE OF GAMMA- $\kappa$ -CHYMOTRYPSIN IN THE RANGE $pH$ 2.0 TO $pH$ 10.5 SUGGESTS THAT GAMMA-CHYMOTRYPSIN IS A COVALENT ACYL-ENZYME ADDUCT AT LOW $pH$ | HYDROLASE (SERINE PROTEINASE)            |
| 3GTU | LIGAND-FREE HETERODIMERIC HUMAN GLUTATHIONE S-TRANSFERASE M2-3 (EC 2.5.1.18), MONOCLINIC CRYSTAL FORM                                                       | TRANSFERASE                              |
| 3HAT | ACTIVE SITE MIMETIC INHIBITION OF THROMBIN                                                                                                                  | COMPLEX (SERINE PROTEASE/INHIBITOR)      |
| 3HFM | STRUCTURE OF AN ANTIBODY-ANTIGEN COMPLEX. CRYSTAL STRUCTURE OF THE HY/HEL-10 FAB-LYSOZYME COMPLEX                                                           | COMPLEX (ANTIBODY-ANTIGEN)               |
| 3HHB | THE CRYSTAL STRUCTURE OF HUMAN DEOXYHAEMOGLOBIN AT 1.74 Å RESOLUTION                                                                                        | OXYGEN TRANSPORT                         |
| 3HHR | HUMAN GROWTH HORMONE AND EXTRACELLULAR DOMAIN OF ITS RECEPTOR: CRYSTAL STRUCTURE OF THE COMPLEX                                                             | HORMONE/RECEPTOR                         |
| 3HMG | REFINEMENT OF THE INFLUENZA VIRUS HEMAGGLUTININ BY SIMULATED ANNEALING                                                                                      | VIRAL PROTEIN                            |
| 3HVT | STRUCTURAL BASIS OF ASYMMETRY IN THE HUMAN IMMUNODEFICIENCY VIRUS TYPE 1 REVERSE TRANSCRIPTASE HETERODIMER                                                  | NUCLEOTIDYLTRANSFERASE                   |
| 3INS | STRUCTURE OF INSULIN. RESULTS OF JOINT NEUTRON AND X-RAY REFINEMENT                                                                                         | HORMONE                                  |
|      |                                                                                                                                                             | MOTOR PROTEIN                            |

|      |                                                                                                                                         |                                    |
|------|-----------------------------------------------------------------------------------------------------------------------------------------|------------------------------------|
| 3KIN | KINESIN (DIMERIC) FROM RATTUS NORVEGICUS                                                                                                | NITROGEN FIXATION                  |
| 3MIN | NITROGENASE MOFE PROTEIN FROM AZOTOBACTER VINELANDII, OXIDIZED STATE                                                                    | SWEET-TASTING PROTEIN              |
| 3MON | CRYSTAL STRUCTURES OF TWO INTENSELY SWEET PROTEINS                                                                                      | HORMONE                            |
| 3MTH | X-RAY CRYSTALLOGRAPHIC STUDIES ON HEXAMERIC INSULINS IN THE PRESENCE OF HELIX-STABILIZING AGENTS, THIOCYANATE, METHYLPARABEN AND PHENOL | DIOXYGENASE                        |
| 3PCA | STRUCTURE OF PROTOCATECHUATE 3,4-DIOXYGENASE COMPLEXED WITH 3,4-DIHYDROXYBENZOATE                                                       | DIOXYGENASE                        |
| 3PCB | STRUCTURE OF PROTOCATECHUATE 3,4-DIOXYGENASE COMPLEXED WITH 3-HYDROXYBENZOATE                                                           | DIOXYGENASE                        |
| 3PCC | STRUCTURE OF PROTOCATECHUATE 3,4-DIOXYGENASE COMPLEXED WITH 4-HYDROXYBENZOATE                                                           | DIOXYGENASE                        |
| 3PCD | PROTOCATECHUATE 3,4-DIOXYGENASE Y447H MUTANT                                                                                            | DIOXYGENASE                        |
| 3PCE | STRUCTURE OF PROTOCATECHUATE 3,4-DIOXYGENASE COMPLEXED WITH 3-HYDROXYPHENYLACETATE                                                      | DIOXYGENASE                        |
| 3PCF | STRUCTURE OF PROTOCATECHUATE 3,4-DIOXYGENASE COMPLEXED WITH 3-FLURO-4-HYDROXYBENZOATE                                                   | DIOXYGENASE                        |
| 3PCG | STRUCTURE OF PROTOCATECHUATE 3,4-DIOXYGENASE COMPLEXED WITH THE INHIBITOR 4-HYDROXYPHENYLACETATE                                        | DIOXYGENASE                        |
| 3PCH | STRUCTURE OF PROTOCATECHUATE 3,4-DIOXYGENASE COMPLEXED WITH 3-CHLORO-4-HYDROXYBENZOATE                                                  | DIOXYGENASE                        |
| 3PCI | STRUCTURE OF PROTOCATECHUATE 3,4-DIOXYGENASE COMPLEXED WITH 3-IODO-4-HYDROXYBENZOATE                                                    | DIOXYGENASE                        |
| 3PCJ | STRUCTURE OF PROTOCATECHUATE 3,4-DIOXYGENASE COMPLEXED WITH 2-HYDROXYISONICOTINIC ACID N-OXIDE                                          | DIOXYGENASE                        |
| 3PCK | STRUCTURE OF PROTOCATECHUATE 3,4-DIOXYGENASE COMPLEXED WITH 6-HYDROXYNICOTINIC ACID N-OXIDE                                             | DIOXYGENASE                        |
| 3PCL | STRUCTURE OF PROTOCATECHUATE 3,4-DIOXYGENASE COMPLEXED WITH 2-HYDROXYISONICOTINIC ACID N-OXIDE AND CYANIDE                              | DIOXYGENASE                        |
| 3PCM | STRUCTURE OF PROTOCATECHUATE 3,4-DIOXYGENASE COMPLEXED WITH 6-HYDROXYNICOTINIC ACID N-OXIDE AND CYANIDE                                 | DIOXYGENASE                        |
| 3PCN | STRUCTURE OF PROTOCATECHUATE 3,4-DIOXYGENASE COMPLEXED WITH 3,4-DIHYDROXYPHENYLACETATE                                                  | PHOTOSYNTHETIC REACTION CENTER     |
| 3PRC | PHOTOSYNTHETIC REACTION CENTER FROM RHODOPSEUDOMONAS VIRIDIS (QB-DEPLETED)                                                              | HYDROLASE(SERINE PROTEINASE)       |
| 3PRK | INHIBITION OF PROTEINASE K BY METHOXYSUCCINYL-ALA-ALA-PRO-ALA-CHLOROMETHYL KETONE. AN X-RAY STUDY AT 2.2-ANGSTROMS RESOLUTION           | PRO REGION                         |
| 3PRO | ALPHA-LYTIC PROTEASE COMPLEXED WITH C-TERMINAL TRUNCATED PRO REGION                                                                     | COMPLEX (OXIDOREDUCTASE/PEPTIDE)   |
| 3R1R | RIBONUCLEOTIDE REDUCTASE R1 PROTEIN WITH AMPPNP OCCUPYING THE ACTIVITY SITE FROM ESCHERICHIA COLI                                       | COMPLEX (ISOMERASE/DEOXYADENOSINE) |

|      |                                                                                                                                                                                                   |                                      |
|------|---------------------------------------------------------------------------------------------------------------------------------------------------------------------------------------------------|--------------------------------------|
| 3REQ | METHYLMALONYL-COA MUTASE, SUBSTRATE-FREE STATE (POOR QUALITY STRUCTURE)                                                                                                                           | LYASE(CARBON-CARBON)                 |
| 3RUB | CRYSTAL STRUCTURE OF THE UNACTIVATED FORM OF RIBULOSE-1,5-BISPHOSPHATE CARBOXYLASE(SLASH)OXYGENASE FROM TOBACCO REFINED AT 2.0-ANGSTROMS RESOLUTION                                               | HYDROLASE(CARBOXYPEPTIDASE)          |
| 3SC2 | REFINED ATOMIC MODEL OF WHEAT SERINE CARBOXYPEPTIDASE II AT 2.2-ANGSTROMS RESOLUTION                                                                                                              | HYDROLASE (SERINE PROTEINASE)        |
| 3SGA | STRUCTURES OF PRODUCT AND INHIBITOR COMPLEXES OF STREPTOMYCES GRISEUS PROTEASE A AT 1.8 ANGSTROMS RESOLUTION. A MODEL FOR SERINE PROTEASE CATALYSIS                                               | COMPLEX(SERINE PROTEINASE-INHIBITOR) |
| 3SGB | STRUCTURE OF THE COMPLEX OF STREPTOMYCES GRISEUS PROTEASE B AND THE THIRD DOMAIN OF THE TURKEY OVOMUCOID INHIBITOR AT 1.8 ANGSTROMS RESOLUTION                                                    | HYDROLASE/HYDROLASE INHIBITOR        |
| 3SGQ | GLN 18 VARIANT OF TURKEY OVOMUCOID INHIBITOR THIRD DOMAIN COMPLEXED WITH STREPTOMYCES GRISEUS PROTEINASE B AT PH 10.7                                                                             | COMPLEX(PROTEINASE/INHIBITOR)        |
| 3SIC | MOLECULAR RECOGNITION AT THE ACTIVE SITE OF SUBTILISIN BPN': CRYSTALLOGRAPHIC STUDIES USING GENETICALLY ENGINEERED PROTEINACEOUS INHIBITOR SSI (STREPTOMYCES SUBTILISIN INHIBITOR)                | HYDROLASE(NUCLEIC ACID,RNA)          |
| 3SRN | STRUCTURAL CHANGES THAT ACCOMPANY THE REDUCED CATALYTIC EFFICIENCY OF TWO SEMISYNTHETIC RIBONUCLEASE ANALOGS                                                                                      | COMPLEX(SERINE PROTEINASE-INHIBITOR) |
| 3TEC | CALCIUM BINDING TO THERMITASE. CRYSTALLOGRAPHIC STUDIES OF THERMITASE AT 0, 5 AND 100 MM CALCIUM                                                                                                  | HYDROLASE (METALLOPROTEINASE)        |
| 3TMN | THE BINDING OF L-VALYL-L-TRYPTOPHAN TO CRYSTALLINE THERMOLYSIN ILLUSTRATES THE MODE OF INTERACTION OF A PRODUCT OF PEPTIDE HYDROLYSIS                                                             | HYDROLASE                            |
| 3UBP | DIAMIDOPHOSPHATE INHIBITED BACILLUS PASTEURII UREASE                                                                                                                                              | SERINE PROTEASE                      |
| 3VGC | GAMMA-CHYMOTRYPSIN L-NAPHTHYL-1-ACETAMIDO BORONIC ACID ACID INHIBITOR COMPLEX                                                                                                                     | APOPTOSIS                            |
| 3YGS | APAF-1 CARD IN COMPLEX WITH PRODOMAIN OF PROCASPASE-9                                                                                                                                             | IMMUNOGLOBULIN                       |
| 43C9 | CRYSTALLOGRAPHIC STRUCTURE OF THE ESTEROLYTIC AND AMIDOLYTIC 43C9 ANTIBODY                                                                                                                        | OXIDOREDUCTASE (PQQ(A)-CHOH(D))      |
| 4AAH | METHANOL DEHYDROGENASE FROM METHYLOPHILUS W3A1                                                                                                                                                    | HORMONE/GROWTH FACTOR                |
| 4AIY | R6 HUMAN INSULIN HEXAMER (SYMMETRIC), NMR, 'GREEN' SUBSTATE, AVERAGE STRUCTURE                                                                                                                    | TRANSFERASE (CARBAMOYL-P,ASPARTATE)  |
| 4AT1 | STRUCTURAL CONSEQUENCES OF EFFECTOR BINDING TO THE T STATE OF ASPARTATE CARBAMOYLTRANSFERASE. CRYSTAL STRUCTURES OF THE UNLIGATED AND ATP-, AND CTP-COMPLEXED ENZYMES AT 2.6-ANGSTROMS RESOLUTION | IMMUNOGLOBULIN                       |
| 4BJL | LOCW, A LAMBDA 1 TYPE LIGHT-CHAIN DIMER (BENCE-JONES PROTEIN) CRYSTALLIZED IN DISTILLED WATER                                                                                                     | SERPIN                               |
| 4CAA | CLEAVED ANTICHYMOTRYPSIN T345R                                                                                                                                                                    | HYDROLASE (SERINE PROTEINASE)        |
| 4CHA | STRUCTURE OF ALPHA-*CHYMOTRYPSIN REFINED AT 1.68 ANGSTROMS RESOLUTION                                                                                                                             | HYDROLASE (C-TERMINAL PEPTIDASE)     |
| 4CPA | REFINED CRYSTAL STRUCTURE OF THE POTATO INHIBITOR COMPLEX                                                                                                                                         |                                      |

| OF CARBOXYPEPTIDASE A AT 2.5 ANGSTROMS RESOLUTION |                                                                                                                                                                                              |                                      |
|---------------------------------------------------|----------------------------------------------------------------------------------------------------------------------------------------------------------------------------------------------|--------------------------------------|
| 4FAB                                              | THREE-DIMENSIONAL STRUCTURE OF A FLUORESCIEIN-FAB COMPLEX CRYSTALLIZED IN 2-METHYL-2,4-PENTANEDIOL                                                                                           | IMMUNOGLOBULIN                       |
| 4FAP                                              | ATOMIC STRUCTURES OF THE RAPAMYCIN ANALOGS IN COMPLEX WITH BOTH HUMAN FKBP12 AND FRB DOMAIN OF FRAP                                                                                          | CELL CYCLE                           |
| 4GCH                                              | STRUCTURE AND ACTIVITY OF TWO PHOTOREVERSIBLE CINNAMATES BOUND TO CHYMOTRYPSIN                                                                                                               | HYDROLASE (SERINE PROTEINASE)        |
| 4HHB                                              | THE CRYSTAL STRUCTURE OF HUMAN DEOXYHAEMOGLOBIN AT 1.74 ANGSTROMS RESOLUTION                                                                                                                 | OXYGEN TRANSPORT                     |
| 4HMG                                              | REFINEMENT OF THE INFLUENZA VIRUS HEMAGGLUTININ BY SIMULATED ANNEALING                                                                                                                       | VIRAL PROTEIN                        |
| 4HTC                                              | THE REFINED STRUCTURE OF THE HIRUDIN-THROMBIN COMPLEX                                                                                                                                        | HYDROLASE(SERINE PROTEASE)           |
| 4HVP                                              | STRUCTURE OF COMPLEX OF SYNTHETIC HIV-1 PROTEASE WITH A SUBSTRATE-BASED INHIBITOR AT 2.3 ANGSTROMS RESOLUTION                                                                                | HYDROLASE(ACID PROTEINASE)           |
| 4INS                                              | THE STRUCTURE OF 2ZN PIG INSULIN CRYSTALS AT 1.5 ANGSTROMS RESOLUTION                                                                                                                        | HORMONE                              |
| 4MON                                              | ORTHORHOMBIC MONELLIN                                                                                                                                                                        | SWEET-TASTING PROTEIN                |
| 4PRO                                              | ALPHA-LYTIC PROTEASE COMPLEXED WITH PRO REGION                                                                                                                                               | SERINE PROTEASE                      |
| 4R1R                                              | RIBONUCLEOTIDE REDUCTASE R1 PROTEIN WITH SUBSTRATE, GDP AND EFFECTOR DTTP FROM ESCHERICHIA COLI                                                                                              | COMPLEX (OXIDOREDUCTASE/PEPTIDE)     |
| 4RCR                                              | STRUCTURE OF THE REACTION CENTER FROM RHODOBACTER SPHAEROIDES R-26 AND 2.4.1: PROTEIN-COFACTOR (BACTERIOCHLOROPHYLL, BACTERIOPHEOPHYTIN, AND CAROTENOID) INTERACTIONS                        | PHOTOSYNTHETIC REACTION CENTER       |
| 4REQ                                              | METHYLMALONYL-COA MUTASE SUBSTRATE COMPLEX                                                                                                                                                   | ISOMERASE                            |
| 4RUB                                              | A CRYSTAL FORM OF RIBULOSE-1,5-BISPHOSPHATE CARBOXYLASE(SLASH)OXYGENASE FROM NICOTIANA TABACUM IN THE ACTIVATED STATE                                                                        | LYASE(CARBON-CARBON)                 |
| 4SGA                                              | STRUCTURES OF PRODUCT AND INHIBITOR COMPLEXES OF STREPTOMYCES GRISEUS PROTEASE A AT 1.8 ANGSTROMS RESOLUTION. A MODEL FOR SERINE PROTEASE CATALYSIS                                          | HYDROLASE (SERINE PROTEINASE)        |
| 4SGB                                              | STRUCTURE OF THE COMPLEX OF STREPTOMYCES GRISEUS PROTEINASE B AND POLYPEPTIDE CHYMOTRYPSIN INHIBITOR-1 FROM RUSSET BURBANK POTATO TUBERS AT 2.1 ANGSTROMS RESOLUTION                         | COMPLEX(SERINE PROTEINASE-INHIBITOR) |
| 4SRN                                              | STRUCTURAL CHANGES THAT ACCOMPANY THE REDUCED CATALYTIC EFFICIENCY OF TWO SEMISYNTHETIC RIBONUCLEASE ANALOGS                                                                                 | HYDROLASE(NUCLEIC ACID,RNA)          |
| 4TMN                                              | SLOW-AND FAST-BINDING INHIBITORS OF THERMOLYSIN DISPLAY DIFFERENT MODES OF BINDING. CRYSTALLOGRAPHIC ANALYSIS OF EXTENDED PHOSPHONAMIDATE TRANSITION-STATE ANALOGUES                         | HYDROLASE (METALLOPROTEINASE)        |
| 4TPI                                              | THE REFINED 2.2-ANGSTROMS (0.22-NM) X-RAY CRYSTAL STRUCTURE OF THE TERNARY COMPLEX FORMED BY BOVINE TRYPSINOGEN, VALINE-VALINE AND THE ARG15 ANALOGUE OF BOVINE PANCREATIC TRYPSIN INHIBITOR | COMPLEX (PROTEINASE/INHIBITOR)       |
| 4UBP                                              | STRUCTURE OF BACILLUS PASTEURII UREASE INHIBITED WITH ACETOHYDROXAMIC ACID AT 1.55 A RESOLUTION                                                                                              | HYDROLASE                            |



|       |                                                                                                                                                                                                         |                                     |
|-------|---------------------------------------------------------------------------------------------------------------------------------------------------------------------------------------------------------|-------------------------------------|
| 4VGC  | GAMMA-CHYMOTRYPSIN D-NAPHTHYL-1-ACETAMIDO BORONIC ACID INHIBITOR COMPLEX                                                                                                                                | SERINE PROTEASE                     |
| 5AIY  | R6 HUMAN INSULIN HEXAMER (SYMMETRIC), NMR, 'RED' SUBSTATE, AVERAGE STRUCTURE                                                                                                                            | HORMONE/GROWTH FACTOR               |
| 5-Apr | STRUCTURES OF COMPLEXES OF RHIZOPUSPEPSIN WITH PEPSTATIN AND OTHER STATINE-CONTAINING INHIBITORS                                                                                                        | HYDROLASE (ACID PROTEINASE)         |
| 5AT1  | STRUCTURAL CONSEQUENCES OF EFFECTOR BINDING TO THE T STATE OF ASPARTATE CARBAMOYLTRANSFERASE. CRYSTAL STRUCTURES OF THE UNLIGATED AND ATP-, AND CTP-COMPLEXED ENZYMES AT 2.6-ANGSTROMS RESOLUTION       | TRANSFERASE (CARBAMOYL-P,ASPARTATE) |
| 5CHA  | THE REFINEMENT AND THE STRUCTURE OF THE DIMER OF ALPHA-<br>*CHYMOTRYPSIN AT 1.67-*ANGSTROMS RESOLUTION                                                                                                  | HYDROLASE (SERINE PROTEINASE)       |
| 5CSC  | STRUCTURE OF AN OPEN FORM OF CHICKEN HEART CITRATE SYNTHASE AT 2.8 ANGSTROMS RESOLUTION                                                                                                                 | OXO-ACID-LYASE                      |
| 5ER2  | HIGH-RESOLUTION X-RAY DIFFRACTION STUDY OF THE COMPLEX BETWEEN ENDOTHAPEPSIN AND AN OLIGOPEPTIDE INHIBITOR. THE ANALYSIS OF THE INHIBITOR BINDING AND DESCRIPTION OF THE RIGID BODY SHIFT IN THE ENZYME | HYDROLASE (ACID PROTEINASE)         |
| 5GCH  | CHEMISTRY OF CAGED ENZYMES /IIS. PHOTOACTIVATION OF INHIBITED CHYMOTRYPSIN                                                                                                                              | HYDROLASE (SERINE PROTEINASE)       |
| 5HMG  | REFINEMENT OF THE INFLUENZA VIRUS HEMAGGLUTININ BY SIMULATED ANNEALING                                                                                                                                  | VIRAL PROTEIN                       |
| 5HVP  | CRYSTALLOGRAPHIC ANALYSIS OF A COMPLEX BETWEEN HUMAN IMMUNODEFICIENCY VIRUS TYPE 1 PROTEASE AND ACETYL-PEPSTATIN AT 2.0-ANGSTROMS RESOLUTION                                                            | HYDROLASE (ACID PROTEINASE)         |
| 5PAD  | BINDING OF CHLOROMETHYL KETONE SUBSTRATE ANALOGUES TO CRYSTALLINE PAPAIN                                                                                                                                | HYDROLASE (SULFHYDRYL PROTEINASE)   |
| 5PRC  | PHOTOSYNTHETIC REACTION CENTER FROM RHODOPSEUDOMONAS VIRIDIS (ATRAZINE COMPLEX)                                                                                                                         | PHOTOSYNTHETIC REACTION CENTER      |
| 5R1R  | RIBONUCLEOTIDE REDUCTASE E441A MUTANT R1 PROTEIN FROM ESCHERICHIA COLI                                                                                                                                  | COMPLEX (OXIDOREDUCTASE/PEPTIDE)    |
| 5REQ  | METHYLMALONYL-COA MUTASE, Y89F MUTANT, SUBSTRATE COMPLEX                                                                                                                                                | ISOMERASE                           |
| 5SGA  | STRUCTURES OF PRODUCT AND INHIBITOR COMPLEXES OF STREPTOMYCES GRISEUS PROTEASE A AT 1.8 ANGSTROMS RESOLUTION. A MODEL FOR SERINE PROTEASE CATALYSIS                                                     | HYDROLASE (SERINE PROTEINASE)       |
| 5SIC  | MOLECULAR RECOGNITION AT THE ACTIVE SITE OF SUBTILISIN BPN': CRYSTALLOGRAPHIC STUDIES USING GENETICALLY ENGINEERED PROTEINACEOUS INHIBITOR SSI (STREPTOMYCES SUBTILISIN INHIBITOR)                      | COMPLEX (PROTEINASE/INHIBITOR)      |
| 5TMN  | SLOW-AND FAST-BINDING INHIBITORS OF THERMOLYSIN DISPLAY DIFFERENT MODES OF BINDING. CRYSTALLOGRAPHIC ANALYSIS OF EXTENDED PHOSPHONAMIDATE TRANSITION-STATE ANALOGUES                                    | HYDROLASE (METALLOPROTEINASE)       |
| 6AT1  | STRUCTURAL CONSEQUENCES OF EFFECTOR BINDING TO THE T STATE OF ASPARTATE CARBAMOYLTRANSFERASE. CRYSTAL STRUCTURES OF THE UNLIGATED AND ATP-, AND CTP-COMPLEXED ENZYMES AT 2.6-ANGSTROMS RESOLUTION       | TRANSFERASE (CARBAMOYL-P,ASPARTATE) |
|       |                                                                                                                                                                                                         | HYDROLASE (SERINE PROTEINASE)       |

|      |                                                                                                                                                                        |                                                  |
|------|------------------------------------------------------------------------------------------------------------------------------------------------------------------------|--------------------------------------------------|
| 6CHA | STRUCTURE OF A TETRAHEDRAL TRANSITION STATE COMPLEX OF ALPHA-*CHYMOTRYPSIN AT 1.8-*ANGSTROMS RESOLUTION                                                                | IMMUNOGLOBULIN                                   |
| 6FAB | THREE-DIMENSIONAL STRUCTURE OF MURINE ANTI-P-AZOPHENYLARSONATE FAB 36-71. 1. X-RAY CRYSTALLOGRAPHY, SITE-DIRECTED MUTAGENESIS, AND MODELING OF THE COMPLEX WITH HAPTEN | HYDROLASE (SERINE PROTEINASE)                    |
| 6GCH | STRUCTURE OF CHYMOTRYPSIN-*TRIFLUOROMETHYL KETONE INHIBITOR COMPLEXES. COMPARISON OF SLOWLY AND RAPIDLY EQUILIBRATING INHIBITORS                                       | OXYGEN STORAGE/TRANSPORT                         |
| 6HBW | CRYSTAL STRUCTURE OF DEOXY-HUMAN HEMOGLOBIN BETA6 GLU->TRP                                                                                                             | HYDROLASE (SULFHYDRYL PROTEINASE)                |
| 6PAD | BINDING OF CHLOROMETHYL KETONE SUBSTRATE ANALOGUES TO CRYSTALLINE PAPAIN                                                                                               | PHOTOSYNTHETIC REACTION CENTER                   |
| 6PRC | PHOTOSYNTHETIC REACTION CENTER FROM RHODOPSEUDOMONAS VIRIDIS (DG-420314 (TRIAZINE) COMPLEX)                                                                            | COMPLEX (OXIDOREDUCTASE/PEPTIDE)                 |
| 6R1R | RIBONUCLEOTIDE REDUCTASE E441D MUTANT R1 PROTEIN FROM ESCHERICHIA COLI                                                                                                 | ISOMERASE                                        |
| 6REQ | METHYLMALONYL-COA MUTASE, 3-CARBOXYPROPYL-COA INHIBITOR COMPLEX                                                                                                        | HORMONE(MUSCLE RELAXANT)                         |
| 6RLX | X-RAY STRUCTURE OF HUMAN RELAXIN AT 1.5 ANGSTROMS. COMPARISON TO INSULIN AND IMPLICATIONS FOR RECEPTOR BINDING DETERMINANTS                                            | HYDROLASE (METALLOPROTEINASE)                    |
| 6TMN | STRUCTURES OF TWO THERMOLYSIN-INHIBITOR COMPLEXES THAT DIFFER BY A SINGLE HYDROGEN BOND                                                                                | PROTEINASE INHIBITOR                             |
| 7API | THE S VARIANT OF HUMAN ALPHA1-ANTITRYPSIN, STRUCTURE AND IMPLICATIONS FOR FUNCTION AND METABOLISM                                                                      | TRANSFERASE (CARBAMOYL-P <sub>i</sub> ASPARTATE) |
| 7AT1 | CRYSTAL STRUCTURES OF ASPARTATE CARBAMOYLTRANSFERASE LIGATED WITH PHOSPHONOACETAMIDE, MALONATE, AND CTP OR ATP AT 2.8-ANGSTROMS RESOLUTION AND NEUTRAL P*H             | IMMUNE SYSTEM                                    |
| 7CEI | THE ENDONUCLEASE DOMAIN OF COLICIN E7 IN COMPLEX WITH ITS INHIBITOR IM7 PROTEIN                                                                                        | IMMUNOGLOBULIN                                   |
| 7FAB | RYSTAL STRUCTURE OF HUMAN IMMUNOGLOBULIN FRAGMENT FAB NEW REFINED AT 2.0 ANGSTROMS RESOLUTION                                                                          | HYDROLASE (SERINE PROTEINASE)                    |
| 7GCH | STRUCTURE OF CHYMOTRYPSIN-*TRIFLUOROMETHYL KETONE INHIBITOR COMPLEXES. COMPARISON OF SLOWLY AND RAPIDLY EQUILIBRATING INHIBITORS                                       | HYDROLASE(ACID PROTEINASE)                       |
| 7HVP | X-RAY CRYSTALLOGRAPHIC STRUCTURE OF A COMPLEX BETWEEN A SYNTHETIC PROTEASE OF HUMAN IMMUNODEFICIENCY VIRUS 1 AND A SUBSTRATE-BASED HYDROXYETHYLAMINE INHIBITOR         | HORMONE                                          |
| 7INS | STRUCTURE OF PORCINE INSULIN COCRYSTALLIZED WITH CLUPEINE Z                                                                                                            | HYDROLASE                                        |
| 7KME | CRYSTAL STRUCTURE OF HUMAN ALPHA-THROMBIN INHIBITED WITH SEL2711.                                                                                                      | PHOTOSYNTHETIC REACTION CENTER                   |
| 7PRC | PHOTOSYNTHETIC REACTION CENTER FROM RHODOPSEUDOMONAS VIRIDIS (DG-420315 (TRIAZINE) COMPLEX)                                                                            | COMPLEX (OXIDOREDUCTASE/PEPTIDE)                 |
| 7R1R | RIBONUCLEOTIDE REDUCTASE E441Q MUTANT R1 PROTEIN FROM ESCHERICHIA COLI                                                                                                 | ISOMERASE                                        |

|      |                                                                                                                                                                                  |                                     |
|------|----------------------------------------------------------------------------------------------------------------------------------------------------------------------------------|-------------------------------------|
| 7REQ | METHYLMALONYL-COA MUTASE, 2-CARBOXYPROPYL-COA INHIBITOR COMPLEX                                                                                                                  | PROTEINASE INHIBITOR                |
| 8API | THE S VARIANT OF HUMAN ALPHA1-ANTITRYPSIN, STRUCTURE AND IMPLICATIONS FOR FUNCTION AND METABOLISM                                                                                | TRANSFERASE (CARBAMOYL-P,ASPARTATE) |
| 8AT1 | CRYSTAL STRUCTURES OF ASPARTATE CARBAMOYLTRANSFERASE LIGATED WITH PHOSPHONOACETAMIDE, MALONATE, AND CTP OR ATP AT 2.8-ANGSTROMS RESOLUTION AND NEUTRAL P*H                       | TRANSFERASE (CARBAMOYL-P,ASPARTATE) |
| 8ATC | COMPLEX OF N-PHOSPHONACETYL-L-ASPARTATE WITH ASPARTATE CARBAMOYLTRANSFERASE. X-RAY REFINEMENT, ANALYSIS OF CONFORMATIONAL CHANGES AND CATALYTIC AND ALLOSTERIC MECHANISMS        | IMMUNOGLOBULIN                      |
| 8FAB | CRYSTAL STRUCTURE OF THE FAB FRAGMENT FROM THE HUMAN MYELOMA IMMUNOGLOBULIN IGG HIL AT 1.8 ANGSTROMS RESOLUTION                                                                  | HYDROLASE (SERINE PROTEINASE)       |
| 8GCH | GAMMA-CHYMOTRYPSIN IS A COMPLEX OF ALPHA-CHYMOTRYPSIN WITH ITS OWN AUTOLYSIS PRODUCTS                                                                                            | HYDROLASE (ACID PROTEINASE)         |
| 8HVP | STRUCTURE AT 2.5-ANGSTROMS RESOLUTION OF CHEMICALLY SYNTHESIZED HUMAN IMMUNODEFICIENCY VIRUS TYPE 1 PROTEASE COMPLEXED WITH A HYDROXYETHYLENE*-BASED INHIBITOR                   | HYDROLASE                           |
| 8PCH | CRYSTAL STRUCTURE OF PORCINE CATHEPSIN H DETERMINED AT 2.1 ANGSTROM RESOLUTION: LOCATION OF THE MINI-CHAIN C-TERMINAL CARBOXYL GROUP DEFINES CATHEPSIN H AMINOPEPTIDASE FUNCTION | LYASE (CARBON-CARBON)               |
| 8RUC | ACTIVATED SPINACH RUBISCO COMPLEXED WITH 2-CARBOXYARABINITOL BISPSPHATE                                                                                                          | HYDROLASE(METALLOPROTEINASE)        |
| 8TLN | STRUCTURAL COMPARISON SUGGESTS THAT THERMOLYSIN AND RELATED NEUTRAL PROTEASES UNDERGO HINGE-BENDING MOTION DURING CATALYSIS                                                      | PROTEINASE INHIBITOR                |
| 9API | THE S VARIANT OF HUMAN ALPHA1-ANTITRYPSIN, STRUCTURE AND IMPLICATIONS FOR FUNCTION AND METABOLISM                                                                                | TRANSFERASE                         |
| 9ATC | ATCASE Y165F MUTANT                                                                                                                                                              | HORMONE                             |
| 9INS | MONOVALENT CATION BINDING IN CUBIC INSULIN CRYSTALS                                                                                                                              |                                     |
